# Supplementary material for: Transcriptome-Wide Gene Expression Plasticity in Stipa grandis in Response to Grazing Intensity Differences
Source: MDPI journal article supplement (doi:10.3390/ijms222111882), 2021-11-02

The following are available online at [www.mdpi.com/xxx/s1](http://www.mdpi.com/xxx/s1), Figure S1: Correlation analysis of the coefficient of variation filtered transcripts, Figure S2: Gene Ontology functional annotation of the filtered transcripts, Figure S3: Kyoto Encyclopedia of Genes and Genomes annotation of the filtered transcripts

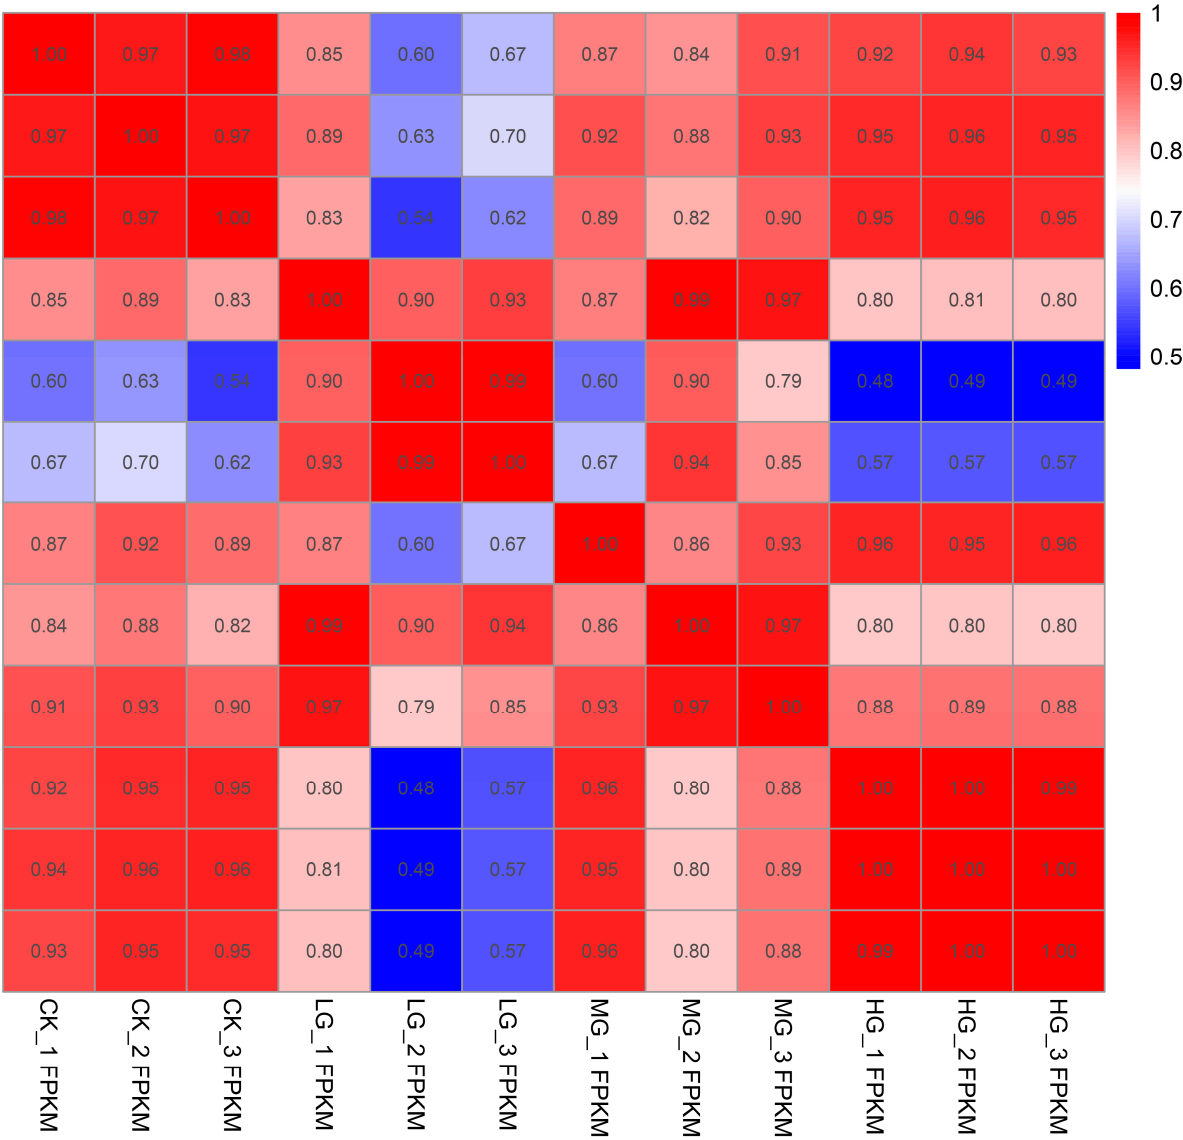

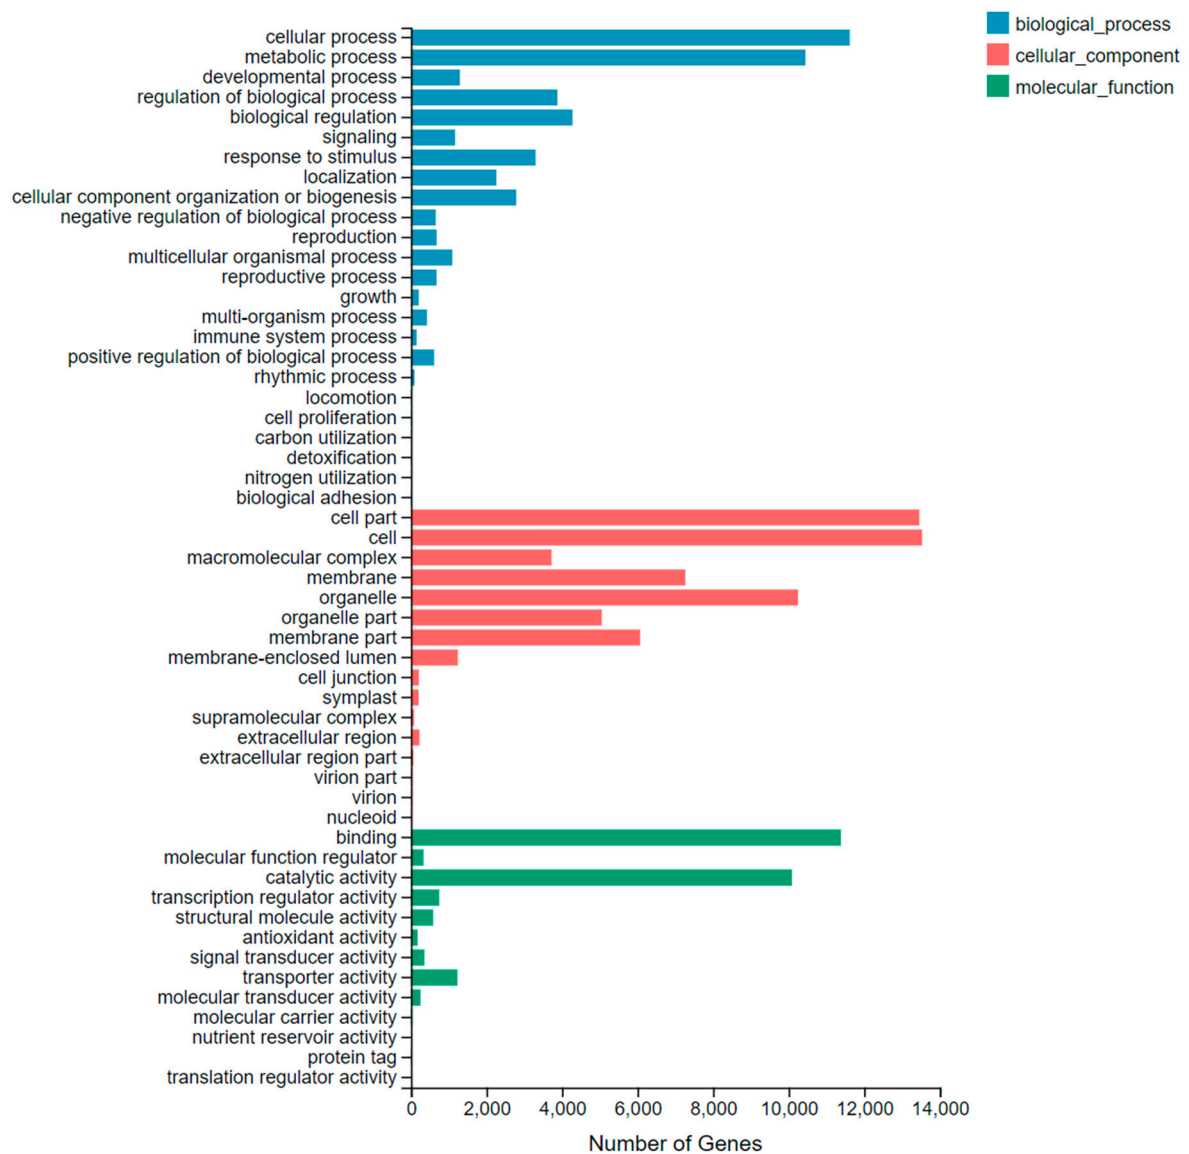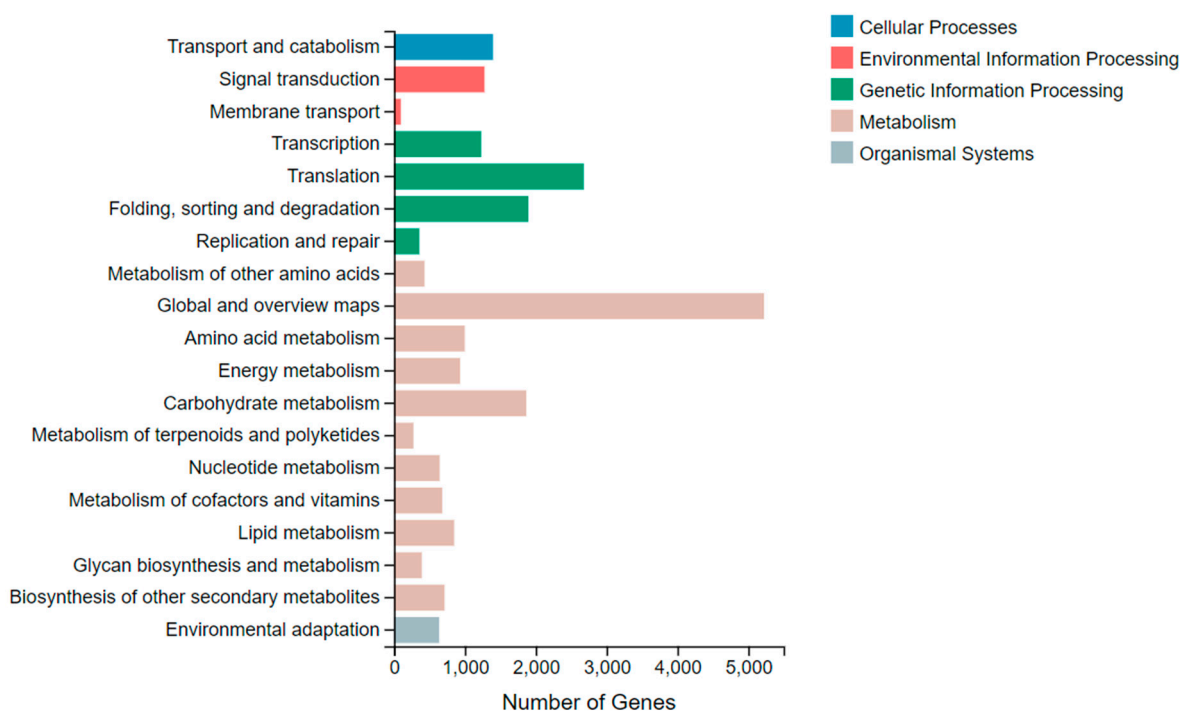

Supplement: s1 [file s1]
