# Supplementary material for: Transcriptome-Wide Gene Expression Plasticity in Stipa grandis in Response to Grazing Intensity Differences
Source: Int J Mol Sci. 2021 Nov 2;22(21):11882. doi: 10.3390/ijms222111882 (PMC8611654; doi:10.3390/ijms222111882)
Supplement: Supplementary file 1 [file ijms-22-11882-s001.zip]

Archive with 9 entries (9 files):
- ijms-1386041-supplementary.pdf
- Table S1. Statistics of BUSCO analysis for the assembled transcriptomes and the coefficient of variation filtered dataset.xlsx
- Table S2. All coefficient of variation filtered genes.xlsx
- Table S3. Functional annotation of all analyzed transcripts.xlsx
- Table S4. Highly expressed differentially expressed genes under different grazing intensities.xlsx
- Table S5. K-means clustering analysis of the differentially expressed genes.xlsx
- Table S6. Transcripts Related to the Calvin¿CBenson cycle.xlsx
- Table S7. Transcripts Related to the photorespiratory pathway.xlsx
- Table S8. Primers used for quantitative real-time PCR.xlsx
