# Supplementary material for: Transcriptome-Wide Gene Expression Plasticity in Stipa grandis in Response to Grazing Intensity Differences
Source: Int J Mol Sci. 2021 Nov 2;22(21):11882. doi: 10.3390/ijms222111882 (PMC8611654; doi:10.3390/ijms222111882)
Supplement: Supplementary file 1 [file ijms-22-11882-s001.zip › Table S1. Statistics of BUSCO analysis for the assembled transcriptomes and the coefficient of variation filtered dataset.xlsx]

## Sheet: Sheet1
Statistics of BUSCO for the transcriptome assembly quality assessment of the 12 Stipa grandis samples
Sample	CS	CD	F	M	T
CK_1	83 (27%)	200 (66%)	10 (3%)	10 (3%)	303 (100%)
CK_2	86 (28%)	190 (63%)	15 (5%)	12 (4%)	303 (100%)
CK_3	89 (29%)	192 (63%)	10 (3%)	12 (4%)	303 (100%)
LG_1	75 (25%)	209 (69%)	11 (4%)	8 (3%)	303 (100%)
LG_2	72 (24%)	213 (70%)	9 (3%)	9 (3%)	303 (100%)
LG_3	72 (24%)	212 (70%)	9 (3%)	10 (3%)	303 (100%)
MG_1	89 (29%)	119 (39%)	70 (23%)	25 (8%)	303 (100%)
MG_2	84 (28%)	200 (66%)	11 (4%)	8 (3%)	303 (100%)
MG_3	89 (29%)	193 (64%)	12 (4%)	9 (3%)	303 (100%)
HG_1	105 (35%)	141 (47%)	38 (13%)	19 (6%)	303 (100%)
HG_2	93 (31%)	174 (57%)	20 (7%)	16 (5%)	303 (100%)
HG_3	99 (33%)	158 (52%)	29 (10%)	17 (6%)	303 (100%)
All-Unigene	28 (9%)	269 (89%)	2 (1%)	4 (1%)	303 (100%)
Statistics of BUSCO for the quality assessment of the filtered dataset (33241 All-unigenes)
Gene number	CS	CD	F	M	T
33241	77 (25%)	184 (61%)	11 (4%)	31 (10%)	303 (100%)
CS: complete and single-copys BUSCOs;
CD: complete and duplicated BUSCOs;
F: fragmented BUSCOs
T: total BUSCO groups searched
Note that complete BUSCOs include single-copy and duplicate BUSCOs. Percentages of the total number of BUSCO groups searched are shown in parentheses (right).
