# Supplementary material for: Transcriptome-Wide Gene Expression Plasticity in Stipa grandis in Response to Grazing Intensity Differences
Source: Int J Mol Sci. 2021 Nov 2;22(21):11882. doi: 10.3390/ijms222111882 (PMC8611654; doi:10.3390/ijms222111882)
Supplement: Supplementary file 1 [file ijms-22-11882-s001.zip › Table S2. All coefficient of variation filtered genes.xlsx]

## Sheet: Sheet1
Gene ID	CK_1 FPKM	CK_2 FPKM	CK_3 FPKM	LG_1 FPKM	LG_2 FPKM	LG_3 FPKM	MG_1 FPKM	MG_2 FPKM	MG_3 FPKM	HG_1 FPKM	HG_2 FPKM	HG_3 FPKM	log2(HG/CK)	Qvalue(CK-vs-HG)	log2(LG/CK)	Qvalue(CK-vs-LG)	log2(MG/CK)	Qvalue(CK-vs-MG)	log2(HG/LG)	Qvalue(LG-vs-HG)	log2(MG/LG)	Qvalue(LG-vs-MG)	log2(HG/MG)	Qvalue(MG-vs-HG)
Unigene20442_All	0.77	0.56	0.49	0.34	0.63	0.68	0.18	0.57	0.7	0.27	0.21	0.23	-1.37117	1.97122e-12	-0.134944	0.108963	-0.322209	0.0175096	-1.23623	2.67552e-10	-0.187265	0.0764858	-1.04896	2.4226e-07
CL2610.Contig28_All	2.99	1.99	2.16	2.6	2.96	3.51	0.73	2.52	2.51	0.64	1.6	0.93	-1.16795	6.20434e-39	0.346834	2.6128e-07	-0.297452	5.51239e-05	-1.51478	2.20206e-72	-0.644286	7.94338e-19	-0.870498	2.31283e-20
CL418.Contig15_All	1.73	1.45	1.52	1.85	1.09	1.38	0.97	2.48	2.28	1.6	2.44	1.03	0.113829	0.0732346	-0.119841	0.0803415	0.298866	0.00161978	0.233669	0.00605399	0.418706	3.6918e-05	-0.185037	0.0203279
CL5775.Contig6_All	6.88	4.6	8.04	5.81	4.16	6.49	3.26	5.28	3.93	2.94	6.08	5.47	-0.426407	2.23076e-31	-0.244079	4.56202e-12	-0.638884	1.09925e-62	-0.182328	4.70721e-07	-0.394805	3.75005e-23	0.212477	1.05527e-07
CL8022.Contig6_All	0.41	0.61	0.24	0.58	1.22	1.25	0.65	0.42	0.77	0.35	0.21	0.44	-0.330624	0.0443238	1.27625	1.44881e-12	0.547586	0.00308926	-1.60687	2.02035e-17	-0.728663	5.29823e-06	-0.87821	2.34285e-05
CL7685.Contig7_All	7.64	12.89	7.61	12.39	9.21	6.02	18.39	9.58	11.87	7.07	12.88	15.98	0.369876	4.90366e-09	-0.0198737	0.194256	0.51785	2.02741e-16	0.38975	5.24748e-10	0.537723	2.01291e-17	-0.147974	0.00405441
Unigene49519_All	0.76	0.36	0.36	0.36	0.48	0.82	0.27	0.58	0.6	0.19	0.24	0.08	-1.5607	1.81856e-13	0.160374	0.087964	-0.0247654	0.232996	-1.72108	5.0848e-17	-0.18514	0.0714076	-1.53594	6.26799e-13
CL4714.Contig10_All	0.56	0.54	0.75	0.79	0.66	0.33	1.24	0.82	0.91	0.35	0.9	1.15	0.383629	0.0106952	-0.0590091	0.192533	0.68724	3.99442e-05	0.442638	0.00329416	0.746249	1.1596e-05	-0.30361	0.0186696
CL3141.Contig7_All	28.21	15.73	22.86	19.45	28.46	30.1	9.99	19.27	18.96	9.07	16.84	13.17	-0.769577	2.07639e-207	0.224594	2.1395e-26	-0.461313	3.1645e-83	-0.994171	0	-0.685907	4.1397e-196	-0.308264	7.35944e-30
Unigene27361_All	0.19	0.66	0.43	0.27	0.29	0.42	0.88	0.43	0.27	0.27	0.23	0.24	-0.791144	1.45731e-07	-0.383665	0.00293056	0.298661	0.00747502	-0.407478	0.00270516	0.682326	3.83328e-07	-1.0898	8.89127e-14
CL8044.Contig9_All	7.43	6.79	7.87	2.96	1.25	2.82	5.36	5.56	5.02	16.28	40.92	30.78	1.99891	0	-1.65084	1.20762e-156	-0.463202	3.59998e-20	3.64975	0	1.18764	1.15018e-69	2.46211	0
CL10484.Contig4_All	2.6	2.92	2.11	4.72	5.37	5.21	3.09	3.29	3.64	0.85	2.12	2.44	-0.491147	1.13796e-08	1.00483	4.04873e-49	0.399598	7.43731e-08	-1.49598	4.1783e-91	-0.605232	1.91629e-21	-0.890745	2.39037e-27
CL1314.Contig32_All	16.48	20.55	8.35	14.7	18	12.24	23.33	22.53	28.36	8.57	20.68	33.09	0.470188	5.83147e-35	-0.0106446	0.199403	0.720086	1.47691e-85	0.480832	1.29125e-36	0.730731	1.51651e-87	-0.249898	8.03575e-14
CL17161.Contig3_All	1.07	2.01	0.63	1.62	1.67	1.46	2.03	0.94	1.21	0.37	0.46	1.02	-0.994886	8.49127e-11	0.356174	0.00148772	0.171506	0.0564352	-1.35106	1.0135e-20	-0.184668	0.0379206	-1.16639	8.52869e-15
Unigene37509_All	0.67	0.93	0.41	0.72	0.68	0.99	0.19	0.66	0.45	0.26	0.24	0.58	-0.884153	7.17162e-05	0.257301	0.0550419	-0.609185	0.00282589	-1.14145	1.26784e-07	-0.866487	3.05355e-05	-0.274968	0.0792609
Unigene46384_All	0.81	1.3	0.69	0.71	0.78	0.64	0.54	0.87	0.84	0.36	0.87	0.86	-0.403645	0.0139083	-0.387689	0.0186846	-0.297202	0.0453742	-0.0159566	0.144578	0.0904871	0.173123	-0.106444	0.153268
CL8357.Contig8_All	5.59	3.47	3.81	1.42	3.6	2.49	0.37	1.02	1.06	1.13	1.49	1.36	-1.68779	1.02036e-114	-0.776897	2.01713e-34	-2.37592	1.87163e-176	-0.91089	2.67187e-27	-1.59902	4.43903e-62	0.688129	4.42853e-10
CL15592.Contig24_All	2.38	4.52	7.41	3.6	2.14	3.1	6.16	7.42	9.25	4.12	9.67	4.79	0.384626	1.15764e-08	-0.689675	9.61128e-17	0.68523	1.94947e-25	1.0743	1.02137e-43	1.3749	1.84237e-76	-0.300603	4.47355e-07
CL15409.Contig3_All	0.15	0.13	0.06	0.72	0.88	0.4	0.16	0.54	0.48	0	0	0	-4.55596	0.00019201	2.55276	2.09261e-11	1.79576	2.09983e-05	-7.10871	1.47735e-17	-0.756998	0.00273784	-6.35172	2.73322e-11
CL11782.Contig6_All	1.26	1.2	0.89	1.39	1.5	1.08	1.3	1.97	1.47	0.66	1.9	1.02	0.0964571	0.0790965	0.24759	0.00295097	0.507757	8.25304e-09	-0.151133	0.0175819	0.260167	0.000955652	-0.4113	1.26788e-06
CL9452.Contig5_All	3.95	8.16	4.99	10.92	11.31	6.04	17.64	11.15	8.35	4.38	7.73	10.71	0.431409	5.47113e-09	0.730507	3.03619e-24	1.13408	1.05127e-63	-0.299097	1.75737e-06	0.403569	6.5257e-12	-0.702667	1.31213e-29
CL4783.Contig3_All	1.61	2.33	1.58	2.46	4.19	3.66	2.15	2.82	2.94	0.26	0.8	1.03	-1.40015	3.57523e-60	0.898123	1.10411e-54	0.523979	1.3532e-17	-2.29827	1.62894e-216	-0.374144	8.78724e-13	-1.92413	2.6915e-133
Unigene15498_All	5.16	2.02	4.49	2.65	2.35	1.83	0.51	1.97	1.34	2.66	3.06	3.49	-0.333201	1.0399e-08	-0.768378	8.74413e-33	-1.59719	7.65944e-102	0.435177	4.76278e-11	-0.828812	1.9728e-22	1.26399	6.13072e-58
CL8018.Contig2_All	16.77	9.91	12.61	13.99	10.95	10.18	6.51	9.78	12.16	5.31	17.21	18.24	0.0588231	0.0141139	-0.158747	1.87875e-07	-0.458062	6.24536e-44	0.21757	5.12249e-13	-0.299315	8.03494e-19	0.516885	7.60997e-57
CL7317.Contig1_All	116.35	80.95	142.91	90.82	59.09	67.52	90.38	93.21	116.24	88.21	160.43	137.61	0.190249	4.49833e-49	-0.641918	0	-0.173447	4.45218e-36	0.832167	0	0.468472	1.44506e-201	0.363696	1.52915e-163
CL3122.Contig7_All	1.54	1.41	1.66	3.24	2.49	2.16	4.54	2.99	4.61	1.37	1.7	2.44	0.266303	0.00658962	0.779805	1.79271e-13	1.40497	1.5674e-48	-0.513502	1.1242e-07	0.62516	6.21526e-14	-1.13866	1.09585e-35
CL8863.Contig4_All	3.01	2.62	2.29	3.3	2.92	3.14	1.19	2.98	2.3	1.01	1.97	1.86	-0.704601	3.86737e-20	0.242366	9.29173e-05	-0.280515	4.39909e-05	-0.946967	5.83045e-38	-0.522881	2.4762e-14	-0.424087	7.91102e-08
Unigene38190_All	0.45	0.18	0.25	0.34	0.37	0.45	0.43	0.31	0.3	0.18	0.43	0.42	0.244138	0.114221	0.39776	0.065272	0.262812	0.126026	-0.153622	0.0992419	-0.134948	0.17133	-0.0186743	0.223327
CL2170.Contig2_All	3.96	4.1	3.84	5.48	4.13	5.58	3.47	4.41	4.65	1.14	2.42	2.08	-1.07351	2.64223e-49	0.354884	2.72882e-10	0.0824761	0.0530673	-1.4284	4.72773e-97	-0.272408	6.5908e-07	-1.15599	3.56389e-58
CL1085.Contig8_All	3.37	3.64	3.7	4.75	2.37	2.08	1.46	2.88	2.57	2.69	3.29	3.01	-0.249629	4.98784e-05	-0.215711	0.000373092	-0.621769	5.22814e-19	-0.0339187	0.0981353	-0.406058	1.31673e-08	0.37214	1.55728e-07
CL443.Contig20_All	1.06	2.29	1.95	1.71	0.55	1.08	0.54	0.63	0.87	0.9	4.14	4.13	0.79712	2.4801e-20	-0.659663	2.12082e-09	-1.371	2.78916e-27	1.45678	4.42524e-51	-0.711338	2.96651e-07	2.16812	3.79011e-86
CL7947.Contig3_All	1.38	1.12	0.88	2.91	1.8	1.99	0.66	1.26	1.27	0.43	0.83	0.82	-0.688874	5.31886e-07	0.987771	1.52533e-20	-0.0760048	0.156544	-1.67665	7.39874e-45	-1.06378	7.61935e-23	-0.612869	9.04251e-06
CL12893.Contig1_All	3.81	4.8	4.09	7.73	7.47	7.23	5.12	6.53	5.47	1.34	2.76	2.77	-0.87026	1.48039e-15	0.826023	8.06228e-24	0.449798	1.65681e-07	-1.69628	4.14734e-71	-0.376225	4.09829e-07	-1.32006	2.29491e-38
CL4518.Contig9_All	13.29	10.73	12.5	12.92	11.76	15.32	8.32	12.19	14.33	8.62	19.08	11.51	0.105676	0.00036978	0.133314	1.5913e-05	-0.0606934	0.0232482	-0.027638	0.0627832	-0.194008	1.63738e-09	0.16637	1.68439e-07
CL6871.Contig7_All	0.78	0.38	0.5	0.8	0.31	0.48	0.87	0.37	0.43	0.65	1.22	0.71	0.637967	6.75758e-05	-0.0656583	0.185631	0.00860406	0.25239	0.703625	1.057e-05	0.0742624	0.178636	0.629363	8.72199e-05
Unigene30086_All	2.09	1.29	2.93	0.4	0.78	0.37	0.33	0.45	0.67	2.58	2.99	3.05	0.456125	8.2706e-10	-2.02381	2.89431e-67	-2.11716	6.02409e-71	2.47993	6.0877e-118	-0.0933547	0.1517	2.57329	4.51928e-122
Unigene31185_All	7.01	7.68	3.65	11.25	22.4	12.78	25.81	23.29	23.12	2.06	3.31	5.19	-0.787308	2.70543e-29	1.34192	3.26362e-167	1.98628	0	-2.12923	0	0.644355	2.79304e-77	-2.77359	0
CL16636.Contig3_All	4.02	2.73	1.51	2.82	3.14	5.15	2.11	2.38	3.89	1.09	1.99	2.25	-0.622792	3.2993e-23	0.430595	2.02894e-16	0.026077	0.178142	-1.05339	7.77259e-73	-0.404518	9.57857e-15	-0.648869	4.25076e-25
CL8543.Contig42_All	30.45	52.68	27.04	96.81	40.18	65.15	85.21	107.67	119.15	9.56	27	26.97	-0.780763	6.65873e-107	0.881062	1.74542e-238	1.51718	0	-1.66183	0	0.636122	1.80402e-209	-2.29795	0
Unigene29489_All	3.41	5.68	4.14	4.1	3.57	6.13	2.08	2.44	3.17	0.61	2.36	1.95	-1.42079	1.35447e-83	0.0611361	0.0800939	-0.777478	3.91505e-32	-1.48193	6.00366e-93	-0.838614	9.38016e-38	-0.643315	1.23687e-14
Unigene45789_All	0	0	0	0.3	0.31	0.7	0.07	0.2	0.28	0	0	0			7.26942	6.539e-19	6.04599	1.6094e-09	-7.28312	2.49394e-19	-1.22343	1.05376e-05	-6.05969	1.29503e-09
Unigene1606_All	1.25	0.83	1.22	0.7	1.24	0.71	0.61	0.41	0.38	1.55	1.64	1.67	0.575925	0.000529594	-0.309203	0.0438506	-1.21494	5.68629e-07	0.885128	9.9572e-07	-0.905739	0.000240664	1.79087	1.11727e-15
CL2187.Contig3_All	2.91	4.26	3.43	6.49	5.92	5.37	3.51	4.39	5.91	2.4	3.95	4.29	0.01095	0.194077	0.74793	1.58249e-47	0.38725	1.30494e-12	-0.73698	5.41664e-47	-0.36068	6.22998e-14	-0.3763	3.71916e-12
Unigene30907_All	0.28	0.29	0.2	0.31	0.4	0.21	0.19	0.48	0.35	0.24	0.32	0.28	0.129318	0.135114	0.268074	0.0647393	0.43394	0.0148851	-0.138756	0.0836853	0.165866	0.113686	-0.304622	0.0407691
CL3493.Contig11_All	4.76	6.6	2.27	3.64	12.99	10.75	3.62	4.49	6.79	1.13	1.67	2.43	-1.37475	1.23174e-88	1.00571	3.80744e-107	0.135702	0.00407703	-2.38046	0	-0.870011	5.5519e-84	-1.51045	3.61209e-111
CL9695.Contig5_All	1.32	1.06	0.96	1.2	1.77	2.2	0.42	1.15	1.09	0.4	0.68	0.35	-1.2188	3.17531e-28	0.637549	1.83207e-15	-0.311576	0.000447647	-1.85635	2.9792e-78	-0.949126	9.081e-29	-0.907227	6.43577e-15
CL3806.Contig3_All	0.49	1	0.52	0.91	1.1	1.04	0.47	0.87	0.86	0.43	0.63	0.64	-0.230757	0.0375695	0.608001	3.45514e-06	0.139006	0.102353	-0.838759	7.08827e-10	-0.468996	0.000172159	-0.369763	0.00502771
CL589.Contig4_All	5.56	4.5	4.5	5.77	7.1	6.48	4.39	5.84	5.63	2.16	4.41	4.2	-0.431	1.04022e-15	0.411605	1.38784e-18	0.131129	0.00302753	-0.842605	6.37833e-63	-0.280476	6.40016e-10	-0.562129	2.56087e-26
Unigene54511_All	7.16	11.29	3.92	8.58	23.5	21.3	7.78	18.3	20.15	8.04	7.42	9.53	0.172714	0.00399426	1.25727	5.49731e-105	1.06447	9.18562e-71	-1.08456	3.8578e-84	-0.192808	2.79977e-05	-0.891753	1.74706e-53
CL500.Contig2_All	0.63	0.35	0.33	0.93	1.32	0.97	0.91	1.13	1.74	0.4	0.45	0.33	-0.139093	0.145222	1.29986	8.70173e-10	1.54166	5.95903e-14	-1.43896	1.72549e-11	0.241797	0.043098	-1.68075	1.10049e-15
CL7917.Contig4_All	0.48	0.43	0.62	1.17	1.54	1.16	1.26	1.6	1.28	0.31	0.58	0.62	-0.0135729	0.212781	1.33753	8.26682e-19	1.44361	2.87447e-22	-1.3511	1.64417e-19	0.106078	0.101918	-1.45718	1.04189e-22
Unigene5520_All	0.97	1.4	1.55	2.51	2.38	1.7	1.95	2.4	2.03	0.83	1.81	1.7	0.15401	0.0545757	0.752149	7.56564e-12	0.714556	1.0447e-10	-0.598139	7.68474e-09	-0.0375931	0.178897	-0.560546	1.16682e-07
Unigene1564_All	0.96	0.9	0.58	0.94	0.85	0.92	1.24	0.76	1.03	0.27	0.87	0.67	-0.419721	0.00515676	0.162055	0.0866759	0.323106	0.0131068	-0.581776	0.000145191	0.161051	0.0811118	-0.742827	3.52561e-06
CL3551.Contig24_All	0.48	0.43	0.82	0.39	0.34	0.7	0.22	0.43	0.45	0.17	0.28	0.33	-1.1364	1.36975e-14	-0.264257	0.0130407	-0.649037	1.21083e-06	-0.87214	6.14797e-09	-0.384779	0.00278269	-0.487361	0.00122872
CL4931.Contig35_All	6.14	3.83	6.43	8.06	7.04	7.49	6.18	11.63	7.72	1.72	5.02	2.66	-0.797053	9.56726e-32	0.465293	1.69105e-17	0.651636	1.82851e-34	-1.26235	4.8018e-90	0.186344	6.53722e-05	-1.44869	7.89176e-125
CL1459.Contig1_All	9.05	5.64	7.69	7.16	7.86	9.33	2.16	5.88	6.27	2.89	8.26	5.38	-0.431137	8.65461e-21	0.124268	0.00122621	-0.633491	1.92437e-39	-0.555405	7.26813e-35	-0.757758	7.12032e-58	0.202353	3.75104e-05
CL1830.Contig16_All	14.84	15.64	16.53	10.49	7.25	8.42	7.05	8.75	7.53	11.75	18.28	17.3	0.0147074	0.146068	-0.842882	8.61931e-134	-1.00307	4.21956e-178	0.857589	3.06218e-140	-0.160184	3.90497e-05	1.01777	3.69619e-185
Unigene9435_All	1.28	0.94	0.7	0.97	1.45	1.83	0.31	1.24	0.95	0.29	0.58	0.34	-1.27317	1.29417e-19	0.541964	8.37347e-08	-0.21034	0.0250427	-1.81513	1.48464e-45	-0.752304	1.73611e-12	-1.06283	2.66368e-13
Unigene54585_All	0.94	1.63	1.31	0.54	2.09	1.96	0.47	0.71	1.09	0.82	0.25	0.39	-1.39761	1.23542e-08	0.249476	0.0551421	-0.752061	0.000366503	-1.64709	2.34613e-12	-1.00154	1.8045e-06	-0.645553	0.00764375
CL9015.Contig1_All	1.17	0.81	1.04	0.9	1.18	0.87	0.55	0.78	0.78	1.14	1.86	2.56	0.891726	3.1873e-13	-0.0313934	0.206127	-0.508596	0.000555226	0.923119	3.7819e-14	-0.477202	0.00107227	1.40032	3.74371e-25
CL7845.Contig3_All	12.72	12.85	18.17	6.38	3.8	3.82	5.71	5.46	5.37	9.14	14.81	16.76	-0.10009	1.78271e-05	-1.64157	0	-1.39829	0	1.54148	0	0.243279	1.88174e-09	1.2982	0
CL5075.Contig1_All	5.33	10.98	4.01	6.64	5.71	10.36	5.81	1.98	4.57	1	2.68	3.53	-1.48522	1.08168e-86	0.163511	0.00148138	-0.71245	4.1051e-27	-1.64873	9.52879e-113	-0.875961	3.59715e-42	-0.772766	9.42946e-20
Unigene26777_All	23.02	12.4	24.46	13.68	6.97	12.98	14.28	19.46	14.93	18.45	27.39	24.62	0.237771	1.43009e-35	-0.829779	1.7303e-283	-0.292293	9.26033e-44	1.06755	0	0.537486	5.79327e-108	0.530065	2.18765e-152
CL8779.Contig3_All	5.21	1.97	3.43	2.11	3.7	2.13	0.89	3.11	2.44	2.43	2.1	3.4	-0.408777	1.22947e-05	-0.414414	1.19257e-05	-0.700691	9.30148e-12	0.00563681	0.14676	-0.286277	0.00371309	0.291914	0.0028625
CL13669.Contig3_All	4.24	3.01	8.15	2.19	0.7	2.1	0.58	1.53	2.05	3.9	5.12	6.36	0.00510166	0.211542	-1.6221	2.95464e-79	-1.87843	1.52339e-96	1.6272	1.08629e-80	-0.25633	0.010625	1.88353	9.88428e-98
CL3252.Contig11_All	1.02	1.54	0.7	1.22	2.23	1.44	0.68	1.46	1.54	0.66	0.59	0.7	-0.738337	3.87408e-08	0.583116	6.01973e-08	0.180378	0.0409627	-1.32145	1.1591e-26	-0.402738	7.16541e-05	-0.918715	3.92269e-12
CL7169.Contig1_All	4.37	6.29	3.94	4.96	5.36	4.71	4.07	5.55	3.77	2.55	3.6	3.97	-0.51828	1.31075e-11	0.0451215	0.138871	-0.111771	0.0402133	-0.563401	8.43789e-14	-0.156892	0.0100081	-0.406509	1.40977e-07
CL16033.Contig5_All	20.86	15.24	28.68	15.77	8.39	11.03	22.6	17.12	16.99	23.77	37.79	43.37	0.70076	2.35893e-261	-0.876854	1.21724e-235	-0.188058	1.93742e-15	1.57761	0	0.688796	3.14088e-136	0.888819	0
CL1176.Contig9_All	5.02	6.78	2.37	9.66	11.08	9.19	2.01	4.77	7.69	1.49	3.2	2.68	-0.938001	3.72827e-55	1.08036	3.22427e-143	0.0377411	0.132082	-2.01836	0	-1.04262	1.51475e-134	-0.975742	5.38166e-60
CL11318.Contig4_All	2.33	0.59	1.65	0.24	0.45	0.58	0.17	0.52	0.64	1.07	2.82	1.82	0.32636	6.97759e-05	-1.85103	1.87203e-47	-1.7643	2.07153e-44	2.17739	2.75316e-73	0.0867319	0.160449	2.09066	3.84811e-69
CL7279.Contig1_All	0.73	0.29	0.8	1.03	0.58	0.7	1.38	1.24	0.99	1.04	1.25	0.98	0.862425	0.000374378	0.349205	0.0656662	1.00887	4.33546e-05	0.51322	0.00718839	0.659665	0.00248342	-0.146445	0.128623
Unigene87504_All	2.71	1.93	3.88	1.89	4.41	3.13	0.88	3.07	2.75	0.97	2.41	2.12	-0.618346	8.04136e-09	0.151303	0.0353845	-0.329137	0.000695993	-0.76965	1.84125e-13	-0.48044	1.27672e-06	-0.289209	0.00420776
Unigene13640_All	0.58	0.42	0.37	0.57	0.41	0.4	0.13	0.39	0.42	0.11	0.19	0.17	-1.52191	4.86387e-07	0.0274454	0.223273	-0.516145	0.0172817	-1.54936	1.66386e-07	-0.54359	0.0127952	-1.00577	0.00116467
Unigene54282_All	0.88	1.6	0.7	2.2	3.65	2.94	2.02	2.97	1.68	0.43	0.74	0.95	-0.563896	0.00175887	1.4776	3.85456e-25	1.09198	6.27209e-13	-2.04149	5.57593e-39	-0.385616	0.00045868	-1.65588	5.60639e-23
CL3697.Contig21_All	38.1	19.61	38.85	3.37	2.42	5.33	1.06	2.02	2.98	27.29	54.1	40.53	0.339981	9.80149e-85	-3.11593	0	-3.98827	0	3.45591	0	-0.872342	1.0994e-42	4.32825	0
CL3677.Contig1_All	1.73	1.35	0.68	0.59	0.88	0.93	1.09	1.1	0.4	0.44	1.7	1.02	-0.242874	0.0395897	-0.644836	0.000148127	-0.525041	0.00122123	0.401962	0.00603031	0.119795	0.144274	0.282167	0.0356374
CL15581.Contig12_All	1.12	1.35	1.03	1.38	1.51	1.85	1.36	1.75	2.48	1.08	1.23	1.29	0.0452124	0.139308	0.441575	7.23653e-09	0.681087	5.8844e-20	-0.396362	6.59474e-08	0.239512	0.000224517	-0.635875	5.16367e-18
CL15142.Contig3_All	5.39	1.83	4.65	4.16	4.44	7.68	2.24	4.96	5.34	0.63	2.66	1.79	-1.22042	3.52114e-79	0.45702	4.03963e-21	0.08834	0.0292853	-1.67744	3.15343e-173	-0.36868	1.05487e-14	-1.30876	4.02094e-93
CL7887.Contig10_All	0.36	0.5	0.71	0.65	0.92	1	0.29	0.36	0.56	0.09	0.12	0.12	-2.23829	7.9953e-10	0.709951	0.000583494	-0.36544	0.0551034	-2.94824	9.5467e-20	-1.07539	3.1677e-06	-1.87285	1.01919e-06
Unigene33445_All	1.03	0.37	0.59	0.42	0.45	0.37	0.46	0.63	0.34	1.01	1.12	1.31	0.796871	5.91833e-10	-0.677055	2.9345e-05	-0.471857	0.00159684	1.47393	5.91287e-24	0.205198	0.0758768	1.26873	3.91179e-19
Unigene33821_All	6.87	7.04	5.99	8.05	11.06	10.73	3.34	7.46	6.65	2.72	4.71	3.96	-0.800422	2.01572e-71	0.585748	1.16041e-61	-0.179646	4.30197e-06	-1.38617	1.19711e-257	-0.765394	2.48234e-97	-0.620776	5.30515e-41
CL16339.Contig13_All	1.73	2.19	1.63	2.1	1.46	1.62	1.09	1.46	1.45	0.49	1.26	0.98	-1.01366	3.27492e-15	-0.0982373	0.103475	-0.460936	4.56617e-05	-0.91542	1.23869e-12	-0.362698	0.00102091	-0.552722	3.4857e-05
CL2153.Contig7_All	3239.67	4866.91	4841.86	4367.38	2374.78	3186.83	8625.72	5643.46	4390.57	8872.28	9303.44	8909.96	1.07223	0	-0.378868	0	0.535467	0	1.45109	0	0.914335	0	0.536759	0
CL16575.Contig73_All	0.23	0.27	0.2	0.23	0.49	0.72	0.21	0.15	0.2	0.05	0.08	0.11	-1.57744	1.29813e-13	1.03106	4.12379e-14	-0.315623	0.0233242	-2.6085	7.08197e-48	-1.34669	1.72431e-20	-1.26181	1.49952e-08
CL12621.Contig2_All	12.24	5.92	12.26	5.69	10.93	5.94	10.62	10.89	9.13	15.32	18.89	16.7	0.751536	1.34325e-69	-0.427899	2.37721e-16	0.0220461	0.179164	1.17944	6.42454e-146	0.449945	6.54132e-18	0.72949	7.21834e-66
CL6758.Contig2_All	9.57	4.48	6.81	4.92	6.01	7.12	2.42	5.22	5.38	2.15	3.78	2.96	-1.22841	0	-0.207616	4.85452e-19	-0.672442	7.1174e-155	-1.02079	2.92824e-275	-0.464826	1.07637e-69	-0.555968	1.62249e-70
CL617.Contig3_All	1.16	1.29	0.76	1.23	1.55	1.51	1.41	1.51	1.65	0.65	0.67	1	-0.460352	1.86072e-05	0.42447	6.1565e-06	0.516585	4.16748e-08	-0.884822	1.43044e-17	0.0921155	0.0852643	-0.976937	3.53524e-21
Unigene64628_All	0.93	0.89	0.96	0.65	0.69	0.98	0.82	0.97	0.89	0.19	0.78	0.88	-0.575745	2.61243e-06	-0.255262	0.0115694	-0.0436848	0.193034	-0.320483	0.00313883	0.211577	0.0261734	-0.53206	1.49065e-05
Unigene13288_All	0.39	0.28	0.21	0.71	0.25	0.57	0.25	0.7	0.48	0	0	0	-7.47624	3.01897e-21	0.803219	1.03663e-05	0.713585	9.64729e-05	-8.27946	1.74211e-33	-0.0896335	0.154771	-8.18983	1.94142e-31
CL14128.Contig2_All	1.29	1	1.97	1.4	1.13	1.96	2.61	4.35	2.87	1.46	2.16	2.59	0.549915	7.29699e-11	0.0767411	0.11194	1.21667	1.65685e-56	0.473173	6.18295e-09	1.13993	5.22025e-51	-0.666757	7.34934e-22
CL1815.Contig2_All	60.83	44.55	75.6	58.91	37.12	39.24	62.15	64.22	69.3	60.94	107.05	99.86	0.57529	1.8511e-201	-0.41522	4.12437e-75	0.124337	1.01078e-09	0.99051	0	0.539556	2.14706e-130	0.450954	2.49176e-129
Unigene46252_All	1.54	1.52	1.37	1.66	1.39	1.52	0.55	1.18	0.93	1.08	1.05	0.86	-0.567091	3.84238e-08	0.0431658	0.167842	-0.731237	1.50119e-11	-0.610257	1.77122e-09	-0.774403	6.9907e-13	0.164146	0.0477673
Unigene10277_All	1.09	1.87	1.04	0.85	1.46	1.19	1.14	1.64	1.22	0.77	1.4	1.23	-0.219658	0.0504758	-0.184451	0.0774838	0.0195946	0.238398	-0.0352067	0.130051	0.204046	0.0649482	-0.239253	0.0434051
CL10105.Contig6_All	10.05	10.46	6.21	16.28	13.76	15.83	2.75	8.49	10.86	1.96	3.2	3.86	-1.54959	1.3416e-57	0.78547	8.60407e-34	-0.252829	0.000479872	-2.33506	3.37253e-168	-1.0383	1.07444e-52	-1.29676	1.86031e-37
CL207.Contig2_All	0.68	0.62	0.3	0.64	0.68	0.6	0.24	0.59	0.45	0.11	0.24	0.23	-1.45543	4.92946e-18	0.271014	0.0104118	-0.307167	0.00979358	-1.72644	4.39529e-27	-0.578181	6.55898e-06	-1.14826	7.36948e-11
CL10367.Contig2_All	0.42	0.33	0.12	0.2	0.15	0.25	0.53	0.3	0.43	0.19	0.24	0.42	-0.0347932	0.201208	-0.547656	0.0132411	0.539855	0.00549841	0.512863	0.0100762	1.08751	3.94236e-06	-0.574648	0.00322988
Unigene61526_All	0.2	0.42	0.21	0.44	0.43	0.55	0.42	0.62	0.32	0.18	0.44	0.43	0.348358	0.0597337	0.786977	0.001353	0.735553	0.00271881	-0.438619	0.0149399	-0.0514235	0.206248	-0.387196	0.0370386
CL8837.Contig1_All	1.32	0.69	0.71	1.31	1.77	1.87	0.35	1.17	0.89	0.2	0.22	0.35	-1.81674	1.57235e-14	0.866847	4.56676e-09	-0.159694	0.110299	-2.68359	2.50928e-39	-1.02654	2.22264e-11	-1.65705	9.09239e-12
CL5453.Contig3_All	18	11.68	22.13	4.58	4.62	9.05	4.18	7.7	5.33	6.06	25.78	17.24	-0.0685327	0.0244517	-1.50302	3.18741e-185	-1.57432	1.65189e-197	1.43448	3.62574e-166	-0.071307	0.0835331	1.50579	1.66557e-177
CL3168.Contig9_All	11.08	7.29	8.56	12.51	8.5	10.44	12.59	12.58	9.05	4.71	11.91	12.28	0.105216	0.000100818	0.2266	1.06905e-15	0.350828	2.27493e-36	-0.121384	3.0984e-06	0.124228	1.75463e-06	-0.245612	1.55231e-19
CL10247.Contig1_All	2.26	4.47	1.64	5.42	8.52	7.6	3.71	3.31	6.1	0.81	1.99	1.61	-0.909635	3.55382e-12	1.36954	9.80204e-53	0.662887	3.89066e-11	-2.27918	1.2042e-105	-0.706656	8.28133e-19	-1.57252	2.84309e-40
CL7987.Contig6_All	13.48	21.83	13.27	36.55	25.73	28.37	25.97	28.45	30.66	5.75	13.85	18.26	-0.341015	4.44272e-10	0.905947	4.21974e-90	0.82717	3.3325e-73	-1.24696	1.22832e-151	-0.0787775	0.0143167	-1.16818	5.26553e-129
CL45.Contig9_All	13.64	25.33	21.78	40.65	31.48	22.23	34.55	37.66	36.7	10.29	21.08	24.35	-0.11553	0.000268152	0.639287	2.31591e-99	0.852506	4.45584e-188	-0.754817	1.45902e-133	0.213219	2.40767e-16	-0.968037	9.57399e-234
CL8161.Contig2_All	1.21	1.33	0.59	0.48	1.33	0.93	0.26	0.7	0.96	0.51	1.01	0.3	-0.782289	4.69761e-09	-0.18804	0.038729	-0.689994	1.69452e-07	-0.594249	5.9843e-06	-0.501954	0.000136661	-0.0922949	0.137556
Unigene65546_All	1.23	1.01	1.28	1.37	0.84	0.96	1.83	1.55	1.24	1.07	1.6	1.68	0.318283	0.0138581	-0.146386	0.110425	0.406844	0.00409327	0.464669	0.00102334	0.55323	0.000304517	-0.088561	0.138959
Unigene80096_All	3.75	2	2.39	2.77	3.55	4.32	1.33	2.69	3.16	0.76	1.12	1.41	-1.29555	3.46842e-30	0.387404	2.58343e-06	-0.16938	0.0240101	-1.68296	1.02043e-56	-0.556784	1.48031e-10	-1.12617	6.08903e-22
Unigene31659_All	0.4	0.67	0.38	0.38	0.98	0.55	0.23	0.37	0.67	0.64	1.24	0.75	0.862716	3.52499e-05	0.396071	0.0304872	-0.181625	0.141374	0.466644	0.0044714	-0.577697	0.00692965	1.04434	2.08295e-06
CL2621.Contig61_All	2.03	1.1	1.81	1.13	0.7	1.79	1.34	2.32	1.46	0.91	2.04	1.81	-0.0514955	0.0776637	-0.445627	1.32146e-16	0.0612079	0.0674052	0.394132	1.43044e-13	0.506835	3.13038e-21	-0.112703	0.0075642
CL4851.Contig2_All	1.82	3.45	2.2	0.25	0.1	0.17	0.11	0.06	0.07	0.77	1.31	0.9	-1.3245	1.11473e-49	-3.86768	1.25033e-169	-4.95933	3.14419e-190	2.54318	2.78854e-48	-1.09164	0.000380246	3.63483	4.33503e-66
Unigene46287_All	1.19	0.97	0.72	1.22	1.51	1.29	0.42	0.81	1.36	0.22	0.51	0.28	-1.50469	1.513e-16	0.486693	8.10166e-05	-0.141419	0.0985439	-1.99138	1.681e-32	-0.628112	1.36455e-06	-1.36327	2.86262e-13
CL8683.Contig46_All	10.39	9.74	15.16	9.51	10.19	11.76	2	9.47	7.92	8.77	5.45	4.01	-0.949455	3.27448e-130	-0.164379	7.72328e-07	-0.851678	1.1359e-107	-0.785076	4.94104e-85	-0.687298	8.84082e-67	-0.0977777	0.00966021
CL2642.Contig1_All	2.02	1.34	1.81	1.81	1.39	1.92	1.21	1.25	2.16	0.44	1.18	1.61	-0.675995	2.32951e-17	-0.0122201	0.213796	-0.158893	0.011032	-0.663775	5.39332e-17	-0.146672	0.0154032	-0.517103	2.15568e-10
CL1058.Contig42_All	42.85	53.74	56.45	98.67	85.53	60.62	153.08	159.69	134.17	258.7	468.95	484.54	2.99356	0	0.681443	0	1.55607	0	2.31211	0	0.874628	0	1.43749	0
CL1136.Contig38_All	25.28	46.2	31.8	47.27	29.91	28.25	71.22	60.4	59.07	42.66	53.58	63.83	0.637728	9.57448e-272	0.0330215	0.031285	0.890287	0	0.604707	1.7861e-247	0.857266	0	-0.252559	3.28557e-59
CL1800.Contig1_All	0.7	0.63	0.46	0.38	0.45	0.21	0.14	0.18	0.36	0.2	0.27	0.4	-1.03057	0.000177148	-0.775683	0.00231056	-1.39269	5.29165e-06	-0.254882	0.073543	-0.617005	0.0276046	0.362123	0.0884008
CL16820.Contig18_All	1.61	1.65	1.48	3.46	4	2.64	2.84	5.32	4.97	0.51	1.05	0.37	-1.29042	2.92784e-23	1.09467	1.04439e-36	1.4819	1.11662e-74	-2.38509	1.21866e-108	0.387232	4.39166e-09	-2.77233	9.20543e-166
Unigene6034_All	0.31	0.52	0.62	0.95	0.65	0.77	0.69	1	1.16	0.26	0.55	0.26	-0.436591	0.0273156	0.709203	0.000459682	0.99131	9.81787e-07	-1.14579	2.68538e-07	0.282107	0.0382197	-1.4279	9.86275e-11
Unigene58186_All	0.3	0.61	0.25	0.49	0.36	0.55	0.84	0.48	0.97	0.36	1.19	0.64	0.947827	0.00517236	0.277892	0.141436	1.01213	0.00390136	0.669935	0.0137483	0.734234	0.0164851	-0.0642994	0.200915
Unigene22990_All	0.78	0.7	0.74	1.83	1.15	0.83	1.19	0.96	0.65	0.61	1.04	1.62	0.577225	0.00132578	0.786634	2.27817e-05	0.347475	0.0321057	-0.209409	0.0394203	-0.439159	0.00581106	0.22975	0.0611849
CL497.Contig11_All	0.47	0.3	0.59	0.27	0.43	0.38	0.42	0.49	0.55	0.09	0.2	0.27	-1.2788	1.46464e-09	-0.336456	0.0212301	0.0977131	0.158868	-0.942349	8.88562e-06	0.434169	0.00578243	-1.37652	5.08704e-11
Unigene54467_All	4.17	7.3	2.52	13.8	19.37	16.34	7.48	16.2	17.28	1.23	0.82	2.01	-1.77011	7.12899e-44	1.82737	1.50326e-156	1.56834	1.20795e-105	-3.59748	0	-0.259031	3.87044e-07	-3.33845	5.38343e-258
Unigene26620_All	0.98	0.49	0.7	0.56	0.32	0.82	0.12	0.46	0.38	0.22	0.47	0.16	-1.34157	2.42468e-21	-0.343482	0.00156109	-1.1611	3.53709e-17	-0.998088	1.07645e-11	-0.817615	1.45425e-08	-0.180473	0.0795055
Unigene61729_All	4.81	4.01	3.67	9.49	7.3	7.41	7.24	7.29	4.38	1.49	3.42	3.33	-0.583902	1.47993e-07	0.958964	9.07257e-28	0.617954	2.29841e-11	-1.54287	2.56618e-57	-0.341011	7.72192e-06	-1.20186	1.7417e-31
CL4085.Contig4_All	5.51	5.27	4.63	5	6.88	5.88	2.66	5.48	5.5	2.02	5.86	4.95	-0.258758	5.50881e-06	0.206519	7.54605e-05	-0.164618	0.00201205	-0.465276	1.80454e-16	-0.371137	3.98166e-11	-0.0941395	0.0354346
CL2088.Contig7_All	4.21	3.58	3.79	5.01	4.53	4.07	2.2	3.53	3.97	1.89	3.37	2.97	-0.482014	3.35944e-07	0.23732	0.00221187	-0.240056	0.00401589	-0.719335	5.09092e-15	-0.477376	6.62119e-08	-0.241958	0.00563081
Unigene19573_All	2.74	1.5	1.38	2.01	4.56	3.06	0.52	1.46	1.26	0.43	0.88	0.68	-1.49253	2.43959e-45	0.778486	1.20285e-27	-0.781933	5.98627e-17	-2.27102	7.81545e-134	-1.56042	1.87541e-80	-0.710601	2.35466e-09
Unigene32444_All	12.42	6.77	14.68	15.25	19.04	18.15	9.16	14.27	11.62	4.78	6.19	6.12	-0.981647	3.32268e-130	0.632213	2.20085e-94	0.0583902	0.028308	-1.61386	0	-0.573823	3.29023e-79	-1.04004	2.98025e-148
CL12035.Contig4_All	5.12	4.25	4.63	5.63	6.03	7.8	4.08	5.76	6.66	2.74	4.02	4.94	-0.247576	0.000598279	0.477479	5.65227e-12	0.249655	0.000266723	-0.725055	9.51121e-24	-0.227825	0.000287888	-0.49723	3.23903e-11
CL16476.Contig55_All	0.69	0.52	0.6	0.71	0.45	0.48	0.26	0.73	0.58	0.5	0.72	0.71	0.0911469	0.0939335	-0.135349	0.0608417	-0.196536	0.0240759	0.226496	0.00602771	-0.0611869	0.152621	0.287683	0.00243452
CL8850.Contig6_All	7.3	5.85	7.21	7.68	10.79	8.78	5.85	7.95	8.35	4.11	9.15	7.54	0.0382516	0.11922	0.423069	3.31952e-16	0.131849	0.00600561	-0.384817	2.82268e-14	-0.29122	6.56215e-09	-0.0935973	0.0247662
CL8920.Contig9_All	4.87	3.69	3.42	6.5	4.16	4.25	1.76	3.36	4.8	2.53	6.77	6.18	0.375186	5.2122e-10	0.319276	1.52263e-07	-0.262395	6.4969e-05	0.0559099	0.055843	-0.581672	4.43825e-19	0.637582	3.73373e-23
CL1890.Contig26_All	3.05	2.53	2.66	2.51	1.89	1.01	1.41	1.87	0.54	1.06	2.8	3.05	-0.250887	5.55477e-07	-0.602908	9.67198e-28	-1.10067	3.18119e-74	0.352021	2.75024e-10	-0.497758	7.8546e-14	0.849779	1.25632e-41
Unigene49198_All	2.89	3.81	1.29	5.11	2.54	2.55	1.6	5.21	3.2	2.31	2.81	3.12	0.0502736	0.0783307	0.357885	2.02478e-14	0.338846	5.43672e-13	-0.307612	1.16195e-11	-0.0190391	0.171568	-0.288573	3.7029e-10
CL13427.Contig10_All	0.24	0.41	0.19	0.41	0.42	0.4	0.21	0.44	0.2	0.18	0.25	0.25	-0.316711	0.00709807	0.549264	2.66338e-06	0.0246338	0.226466	-0.865975	3.24379e-12	-0.52463	6.58588e-06	-0.341345	0.00472999
Unigene38841_All	0.68	0.57	0.62	0.69	0.6	1.09	0.25	0.74	0.54	0.12	0.32	0.16	-1.64048	2.79318e-10	0.354102	0.0189315	-0.275854	0.0590382	-1.99458	3.65392e-16	-0.629956	0.000568764	-1.36463	4.21287e-07
CL1725.Contig9_All	0.21	0.66	0.49	1.13	0.38	1.24	3.35	1.52	1.87	0.2	0.23	0.4	-0.686729	0.015161	1.02797	4.60191e-05	2.33212	3.26263e-28	-1.7147	2.35718e-09	1.30415	1.35496e-13	-3.01885	6.98945e-37
Unigene71656_All	8.97	4.04	8.7	7.1	5.51	4.82	13.08	11.45	4.64	6.78	4.74	8.93	-0.0752821	0.0560661	-0.311451	4.70152e-07	0.438819	2.87641e-15	0.236169	5.24368e-05	0.75027	5.44533e-37	-0.514101	6.13648e-20
Unigene30149_All	1.16	0.72	0.72	0.96	0.88	1.41	0.18	0.72	0.74	0.2	0.33	0.14	-1.94749	2.4845e-48	0.330892	0.000101949	-0.653404	6.21264e-10	-2.27838	1.99967e-73	-0.984296	1.96003e-22	-1.29409	3.60742e-18
Unigene21505_All	10.13	13.42	13.69	12.97	12.97	11.43	21.93	23	17.3	15.32	18.11	21.21	0.563279	4.37707e-40	0.00905655	0.209976	0.753665	3.78107e-74	0.554222	2.94795e-39	0.744608	1.75528e-72	-0.190386	1.66929e-07
Unigene38722_All	20.32	18.38	18.1	20.43	22.43	21.16	17.72	24.31	19.36	10.38	16.78	21.42	-0.218787	1.27298e-13	0.174911	2.31599e-10	0.121642	8.13328e-06	-0.393698	1.97207e-42	-0.053269	0.0168327	-0.340429	2.6882e-31
Unigene40692_All	10.16	7.31	5.97	5.84	7.59	4.85	6.99	4.83	7	5.09	3.59	5.27	-0.739162	1.15003e-27	-0.355816	1.32025e-08	-0.308067	6.04739e-07	-0.383346	3.04599e-08	0.047749	0.128495	-0.431095	1.02499e-09
CL2431.Contig9_All	2.26	2.76	2	2.33	2.58	2.11	2.87	2.27	2.14	1.29	2.54	2.57	-0.128551	0.00754085	0.00311283	0.233443	0.0569894	0.0924594	-0.131664	0.00418046	0.0538765	0.0933134	-0.18554	0.000419553
CL10810.Contig4_All	0.84	0.31	0.84	0.29	0.19	0.4	0.22	0.45	0.34	0.38	0.36	0.62	-0.537522	0.000177379	-1.17017	7.72995e-12	-0.971251	3.60044e-09	0.632648	0.000177368	0.198919	0.0922609	0.43373	0.00568632
CL15986.Contig44_All	2.68	6.61	4.23	3.12	4.03	3.6	1.75	4.32	2.66	2.25	3.38	5.05	-0.332984	1.21351e-06	-0.33021	1.78394e-06	-0.619211	1.29108e-16	-0.00277401	0.148621	-0.289001	0.000121735	0.286227	0.000120302
CL1505.Contig29_All	2.89	4.73	2.01	0.94	2.27	1.58	0.27	0.93	0.47	0.56	1.31	1.41	-1.55084	1.09351e-79	-1.00645	3.64357e-41	-2.51257	7.27739e-147	-0.544389	6.78616e-09	-1.50612	1.6718e-38	0.961734	2.29478e-14
CL6345.Contig7_All	1.47	1.74	1.17	3.34	3.5	3.31	1.22	2.05	2.73	0.58	0.8	0.84	-0.971361	1.13458e-20	1.21442	6.29789e-64	0.462088	1.00651e-08	-2.18578	1.06654e-146	-0.752327	1.16191e-29	-1.43345	1.46212e-49
CL5895.Contig3_All	5.03	4.09	3.79	5.83	5.53	1.71	3.83	5.1	4.13	2.16	4.18	2.61	-0.523839	5.50482e-18	0.0217069	0.177612	0.0254093	0.17875	-0.545546	9.89135e-20	0.00370241	0.231622	-0.549249	1.26436e-19
CL15641.Contig5_All	4.83	5.3	5.08	7.03	8.59	6.72	1.82	6.14	5.53	1.85	3.28	2.51	-0.990314	1.13038e-58	0.55593	3.11176e-32	-0.160521	0.00106267	-1.54624	5.70402e-170	-0.716452	2.59544e-49	-0.829792	2.04088e-39
CL16595.Contig1_All	1.4	2.58	0.78	1.42	1.84	0.88	2.55	0.95	1.89	0.78	1.47	2.54	0.0261023	0.198239	-0.196453	0.070289	0.190161	0.0706966	0.222556	0.0316132	0.386614	0.00634302	-0.164059	0.0788034
CL9143.Contig1_All	7.57	7.39	5.13	12.07	10.88	13.96	3.55	8.29	7.09	1.48	3.99	2.08	-1.40569	8.97932e-70	0.880961	2.31887e-60	-0.0709063	0.0803332	-2.28665	6.14377e-246	-0.951867	3.82403e-68	-1.33478	2.51459e-61
CL6463.Contig6_All	0.7	0.94	0.77	1.55	1.53	1.86	0.56	1.26	0.95	0.21	0.85	0.53	-0.599697	5.06433e-06	1.03735	1.27427e-23	0.210402	0.0264709	-1.63705	1.70131e-46	-0.826947	1.20016e-16	-0.810099	5.39004e-10
CL9480.Contig3_All	1.67	3.1	1.24	2.38	3.56	5.13	0.89	2.18	2.06	0.53	0.24	0.77	-1.95567	2.71276e-48	0.882649	5.79988e-27	-0.213554	0.0112611	-2.83831	8.15372e-135	-1.0962	1.298e-37	-1.74211	6.49273e-36
CL6820.Contig4_All	25.51	40.07	24.07	60.67	41.91	46.57	36.12	44.73	52.03	10.7	26.25	36.97	-0.26358	2.50127e-14	0.739364	3.3894e-139	0.582283	3.13939e-82	-1.00294	3.47973e-234	-0.15708	2.24735e-09	-0.845863	1.55449e-157
CL12332.Contig4_All	6.95	6.91	7.84	6.76	6.71	8.33	9.49	7.32	7.25	4.06	5.69	3.71	-0.679638	7.28736e-21	0.0103208	0.215672	0.160395	0.00423409	-0.689959	9.0218e-22	0.150074	0.00614613	-0.840033	2.50169e-32
CL1744.Contig3_All	2.52	1.11	2.37	1.86	3.37	4.41	1	1.54	1.95	0.54	1.37	0.56	-1.27762	1.42871e-28	0.685004	6.9559e-17	-0.41039	1.85743e-05	-1.96263	6.97864e-82	-1.09539	5.42115e-35	-0.867234	1.70458e-12
CL3599.Contig25_All	12.26	7.72	8.07	11.28	19.41	14.81	5.92	10.32	11.48	6.72	10.95	10.07	-0.00968025	0.187589	0.699517	9.04302e-77	-0.00651023	0.232538	-0.709197	2.10087e-79	-0.706027	1.36407e-77	-0.00317002	0.220618
CL16495.Contig8_All	0.56	0.18	0.26	0.15	0.1	0.09	1.09	0.61	0.51	1.01	1.55	1.34	1.96127	1.12755e-75	-1.53928	2.78441e-15	1.13638	2.78166e-20	3.50056	5.0765e-140	2.67566	1.1812e-61	0.824895	3.6668e-21
CL14811.Contig5_All	1.02	1	1.03	1.89	1.45	1.47	1.16	1.61	2.96	0.81	1.48	1.5	0.312879	0.00111718	0.653842	5.56558e-11	0.91186	3.29807e-21	-0.340963	7.74212e-05	0.258017	0.00109082	-0.598981	3.01227e-11
CL120.Contig8_All	2.04	1.85	2.73	2.14	3.53	3.06	1.46	2.92	3.05	1.79	2.34	1.74	-0.166418	0.033606	0.400479	2.12125e-05	0.178731	0.0270486	-0.566897	5.51343e-09	-0.221748	0.00708154	-0.345149	0.000379791
CL8410.Contig14_All	1.38	1.24	2.33	2.41	0.89	1.79	0.92	2.17	3.37	3.25	4.66	3.83	1.24973	1.68047e-71	0.0457833	0.155023	0.390172	8.63872e-07	1.20395	8.34835e-68	0.344389	9.69952e-06	0.859559	2.06983e-39
CL15077.Contig1_All	3.74	3.93	2.94	4.83	3.7	5.11	4.87	3.32	3.18	1.47	4.7	4.08	-0.0325696	0.175553	0.369313	9.36859e-05	0.117901	0.0791827	-0.401883	1.42493e-05	-0.251413	0.00376863	-0.15047	0.042418
CL16790.Contig8_All	0.52	0.46	0.62	0.58	0.43	0.56	0.39	0.54	0.72	0.26	0.21	0.22	-1.21337	3.64826e-13	-0.0168129	0.221957	0.0548918	0.187926	-1.19656	4.93915e-13	0.0717047	0.156245	-1.26826	2.33316e-14
CL7001.Contig4_All	1.23	1.16	1.07	1.89	1.6	1.67	0.41	1.11	1.59	0.29	1.07	0.91	-0.59929	4.44098e-09	0.580043	6.67317e-12	-0.143426	0.0445778	-1.17933	3.69368e-36	-0.72347	1.20252e-16	-0.455864	8.90806e-06
CL1446.Contig7_All	0.54	0.4	0.23	0.93	1.39	1.24	0.53	1.41	0.73	0.04	0.13	0.18	-1.73236	9.2106e-12	1.6012	2.198e-28	1.1977	1.04274e-14	-3.33356	1.17453e-65	-0.403504	0.000262565	-2.93006	2.46602e-44
CL5384.Contig3_All	15.11	8.09	12.54	7.89	9.58	7.88	9.42	10.5	12.46	6.26	14.75	12.56	-0.0841926	0.00687075	-0.493422	3.67909e-35	-0.134762	0.000145397	0.409229	1.3716e-24	0.35866	1.47308e-18	0.0505693	0.0504343
CL12779.Contig1_All	0.76	1.18	1.19	1.23	1.67	1.83	0.34	0.67	0.8	0.42	0.73	0.74	-0.722639	1.09068e-06	0.594558	6.29199e-07	-0.776659	3.32712e-07	-1.3172	8.10515e-22	-1.37122	1.74883e-22	0.0540205	0.182299
CL1688.Contig6_All	0.57	0.98	0.79	1.85	1.23	1.18	1.21	1.24	1.62	0.81	1.41	0.72	0.326788	0.00501626	0.861183	2.99133e-12	0.800497	1.33936e-10	-0.534395	1.30728e-06	-0.0606856	0.150835	-0.473709	2.72238e-05
CL9991.Contig4_All	0.38	0.83	0.49	0.63	0.81	0.85	0.19	0.84	0.6	0.29	0.4	0.39	-0.635187	0.0039001	0.435217	0.0132117	-0.043015	0.22636	-1.0704	1.43774e-06	-0.478232	0.00870986	-0.592172	0.00671983
Unigene42601_All	0.96	1.66	0.61	2.1	3.03	2.66	1.28	2.3	1.38	0.32	0.41	0.31	-1.62752	7.21177e-10	1.27478	4.01332e-15	0.639317	0.000200812	-2.9023	1.48731e-41	-0.635466	6.80308e-06	-2.26683	4.44947e-21
CL527.Contig1_All	32.17	12.96	34.4	10.08	6.63	11.32	11.19	16.54	15.3	18.42	28.72	15.21	-0.349439	1.36802e-81	-1.50259	0	-0.879552	0	1.15315	0	0.623035	1.04291e-125	0.530112	1.5262e-136
Unigene41637_All	2.25	1.22	1.63	0.67	1.32	1.86	0.68	1.07	1.23	0.75	1.18	0.52	-1.05429	3.27548e-14	-0.399501	0.000581378	-0.761582	7.54935e-09	-0.654785	3.23928e-06	-0.362082	0.00420437	-0.292703	0.0200524
CL3122.Contig2_All	3.2	1.62	2.13	1.25	3.07	4.39	2.32	1.29	2.3	0.71	1.56	2.41	-0.561157	3.93077e-12	0.325105	1.90186e-06	-0.230659	0.00120734	-0.886262	1.05782e-30	-0.555763	2.84638e-14	-0.330499	4.37262e-05
CL9846.Contig2_All	16.83	12.63	15.05	11.18	8.89	9.34	7.2	9.3	8.13	8.93	18.51	18.56	0.0573183	0.0411978	-0.593925	2.13656e-39	-0.841383	8.55724e-71	0.651243	1.57315e-48	-0.247458	1.17593e-06	0.898702	1.59957e-82
Unigene54430_All	3.28	7.03	6.56	13.92	9.48	7.08	16.44	13.69	12.06	2.44	3.35	5.71	-0.541758	6.4608e-14	0.857692	2.39478e-50	1.33218	2.05793e-139	-1.39945	7.33638e-110	0.474488	2.8099e-25	-1.87394	1.08945e-228
CL9043.Contig6_All	0.83	0.66	0.37	0.33	0.44	0.98	0.66	0.66	0.28	0.26	0.86	0.58	-0.12262	0.0897262	-0.0891229	0.134348	-0.207254	0.0415686	-0.0334973	0.125156	-0.118131	0.108092	0.0846338	0.1363
CL3847.Contig4_All	9.12	9.61	8.3	6.01	6.57	7.52	6.72	5.9	5.39	5.16	10.38	9.53	-0.10356	0.00267527	-0.426352	1.39772e-24	-0.579646	1.50575e-41	0.322792	8.06491e-15	-0.153294	0.000372713	0.476086	7.29051e-28
CL10107.Contig2_All	19.11	18	15.78	11.62	13.1	14.35	6.8	10.95	11.34	9.51	16.73	14.97	-0.354441	1.7732e-30	-0.43487	2.22799e-43	-0.853328	8.19998e-140	0.0804294	0.00308301	-0.418457	2.64819e-30	0.498887	8.96772e-44
CL15549.Contig2_All	0.95	0.41	0.56	0.31	0.6	0.66	0.08	0.17	0.3	0.15	0.25	0.25	-1.55818	3.91248e-15	-0.284307	0.0242454	-1.792	8.39984e-18	-1.27387	3.83292e-10	-1.50769	4.6843e-12	0.233819	0.101604
CL1984.Contig79_All	9.5	4.94	8.29	12.89	5.53	11.86	5.36	9.52	9.09	5.26	9.34	8.13	0.00285537	0.210501	0.416656	1.40821e-40	0.0840146	0.00421952	-0.4138	1.13218e-40	-0.332641	3.9768e-27	-0.0811592	0.00454361
CL7242.Contig4_All	3.61	3.81	3.4	5.06	5.27	4.64	4.89	5.23	5.34	2.07	2.47	3.77	-0.370652	1.63557e-05	0.471772	1.03084e-09	0.527007	8.18161e-12	-0.842424	2.11891e-24	0.0552345	0.119442	-0.897658	1.75582e-27
Unigene15561_All	0.24	0.11	0.11	0.19	0.47	0.41	0.14	0.23	0.1	0.16	0.09	0.08	-0.439876	0.0138175	1.22824	1.48876e-13	0.0821565	0.188241	-1.66811	7.82024e-21	-1.14608	2.87262e-12	-0.522032	0.00569117
CL1137.Contig4_All	6.79	4.47	6.96	3.46	4.05	4.27	1.88	3.48	4.2	1.72	3.75	2.41	-1.20305	1.40145e-63	-0.625991	3.97812e-22	-0.919948	2.96288e-41	-0.577064	1.36366e-13	-0.293957	5.11154e-05	-0.283106	0.000278845
Unigene59910_All	3.68	1.8	3.9	2.32	1.53	1.65	0.97	1.87	1.43	1.5	5.3	5.28	0.371427	3.31622e-09	-0.765407	1.24694e-22	-1.12171	3.757e-41	1.13683	1.24091e-54	-0.356306	8.12158e-05	1.49314	1.70158e-81
CL3249.Contig21_All	1.38	0.87	0.8	1.29	1.02	1.48	0.52	0.83	0.88	0.23	0.8	0.41	-1.09012	4.56492e-19	0.313144	0.000473436	-0.448686	2.27601e-05	-1.40326	7.64956e-34	-0.76183	2.31717e-13	-0.641434	6.45384e-07
Unigene11643_All	8.88	6.72	8.69	7.07	7.4	9.45	3.63	5.55	8.17	5.32	9.65	8.06	-0.0659628	0.0733052	-0.0181857	0.192861	-0.471963	1.1187e-12	-0.0477771	0.0722136	-0.453778	8.86015e-12	0.406	9.18926e-10
CL4043.Contig9_All	1.93	0.7	1.57	0.45	0.25	0.33	0.07	0.24	0.26	0.91	2.26	2.08	0.326665	0.000126199	-2.03231	4.05934e-49	-2.87995	2.15344e-72	2.35898	5.982e-74	-0.847632	8.5246e-05	3.20661	2.53258e-100
CL1172.Contig14_All	1.43	2.48	0.87	3.07	1.69	2.2	1.83	2.53	1.72	1.04	1.33	1.5	-0.300184	0.000127719	0.542884	5.94023e-14	0.352758	1.45195e-06	-0.843068	1.19083e-28	-0.190126	0.00209718	-0.652942	1.08727e-16
CL2289.Contig2_All	38.27	39.38	41.86	62.57	47.66	45.63	47.9	49.19	50.95	16.84	41.45	48.89	-0.139356	1.4554e-05	0.389475	2.38647e-36	0.327253	1.30573e-25	-0.528831	3.62864e-63	-0.0622213	0.0112264	-0.46661	3.84304e-48
CL3611.Contig2_All	2.63	1.53	1.97	0.88	2.06	1.89	0.47	1.38	1.29	0.87	1.3	0.84	-1.02521	2.91649e-26	-0.342641	3.22396e-05	-0.955576	2.67932e-23	-0.682569	9.80491e-12	-0.612935	1.17747e-09	-0.0696346	0.136464
CL581.Contig7_All	30.17	20.9	27.02	14.26	22.61	5.48	9.06	12.51	15.92	20.74	37.3	34.54	0.251317	3.31014e-27	-0.880941	1.66586e-210	-1.05089	5.64773e-281	1.13226	0	-0.169951	3.52675e-07	1.30221	0
CL2631.Contig2_All	17.76	18.65	11.28	9.39	13.64	5.57	34.25	36.85	35.61	17.9	19.61	18.57	0.249888	1.6485e-06	-0.730086	8.08992e-30	1.18315	5.19555e-144	0.979974	1.80252e-57	1.91324	3.21846e-290	-0.933263	8.86091e-99
CL3191.Contig27_All	0.19	0.2	0.24	0.27	0.28	0.16	0.67	0.22	0.39	0.2	0.16	0.35	0.173753	0.103532	0.197215	0.0995163	1.03567	1.63107e-08	-0.023462	0.140092	0.838455	1.68797e-06	-0.861917	8.24957e-07
Unigene35120_All	3.45	5.01	3.17	5.5	5.6	6.15	2.96	5.85	5.84	1.43	2.24	0.78	-1.38264	4.96595e-39	0.571088	3.07018e-14	0.347735	5.02845e-06	-1.95372	1.77555e-92	-0.223353	0.000700027	-1.73037	3.7313e-67
Unigene31722_All	12.56	14.36	18.8	8.18	5.69	8.01	4.92	9.02	9.61	14.44	27.29	18.58	0.402937	5.86905e-50	-1.06159	1.56144e-201	-0.948906	3.52464e-167	1.46453	0	0.112683	0.00241258	1.35184	0
Unigene65457_All	0.22	0.21	0.21	0.39	0.83	0.51	0.62	0.71	0.99	0.18	0.5	0.26	0.553138	0.0193173	1.43972	2.03271e-08	1.86814	1.169e-14	-0.886579	4.19356e-05	0.428419	0.00819624	-1.315	1.29729e-09
CL3906.Contig34_All	82.67	31.03	83.78	92.14	52.15	64.58	67.09	67.93	54.83	70.48	50.86	87.73	0.0891496	4.95142e-10	0.0846005	4.27735e-09	-0.049296	0.000434098	0.00454912	0.1175	-0.133896	1.27643e-19	0.138446	4.61001e-21
CL16253.Contig36_All	5.31	3.01	2.68	2.64	6.15	6.3	0.88	3.08	3.65	1.68	2.07	0.53	-1.35916	2.35919e-70	0.456675	2.86965e-16	-0.521845	3.31667e-15	-1.81583	2.66972e-145	-0.97852	9.38753e-57	-0.837313	1.75446e-23
Unigene37737_All	0.61	0.5	1	1.36	1.35	0.37	2.09	3.03	3.58	1.19	2.11	2.2	1.39177	8.30144e-26	0.548101	0.000158332	2.05587	8.21826e-67	0.843665	8.99085e-13	1.50776	5.34667e-44	-0.6641	6.23729e-13
CL6058.Contig1_All	1.13	1.21	0.81	2.96	3.22	2.46	1.91	1.5	2.55	0.27	0.74	0.76	-0.820186	3.58886e-08	1.45768	3.29958e-45	0.92703	2.16563e-16	-2.27786	2.33162e-82	-0.530647	1.02109e-09	-1.74722	5.80517e-41
CL7136.Contig4_All	7.13	12.33	5.79	3.59	2.93	3.32	2.72	2.39	3.06	2.24	4.78	4.22	-1.16682	0	-1.35654	0	-1.62672	0	0.189718	3.69506e-07	-0.270184	1.79413e-10	0.459902	8.40752e-29
Unigene20328_All	0.92	0.55	0.4	0.92	1.4	0.85	0.41	1.15	0.51	0.17	0.36	0.24	-1.28786	3.68978e-09	0.758674	6.60081e-07	0.157436	0.108149	-2.04653	5.08205e-26	-0.601238	3.83378e-05	-1.44529	1.70121e-11
CL5393.Contig2_All	6.71	4.54	8.59	11.04	16.32	14.12	13.67	4.84	18.87	2.15	5.02	6.93	-0.487614	6.36411e-25	1.06494	1.17167e-188	0.913409	8.85434e-132	-1.55255	0	-0.151528	5.65006e-07	-1.40102	1.83692e-261
CL14071.Contig2_All	0.75	0.67	0.23	1.97	1.1	1.44	0.64	1	1.58	0.13	0.35	0.28	-1.11496	1.65266e-10	1.44653	8.9701e-37	0.964569	6.08238e-15	-2.56149	4.70781e-77	-0.481964	3.31642e-07	-2.07953	1.85372e-43
Unigene24403_All	1.08	1.29	1.62	1.48	0.91	1.31	1.2	1.31	1.14	0.64	1.4	1.4	-0.206583	0.0246249	-0.106815	0.102647	-0.123454	0.091752	-0.0997675	0.0688185	-0.0166389	0.219785	-0.0831286	0.127568
CL6665.Contig9_All	1.64	2.26	1.71	2.95	1.73	2.22	0.72	2.52	3.25	0.58	0.78	0.92	-1.29359	1.12531e-57	0.299959	5.3249e-07	0.218839	0.000199856	-1.59355	4.55168e-96	-0.08112	0.0507434	-1.51243	9.22985e-84
CL164.Contig10_All	6.18	4.8	4.32	7.3	5.57	8.06	10.84	9.65	9.39	3.04	4.63	7.69	0.0171459	0.179724	0.456438	1.25053e-15	0.975603	6.25112e-77	-0.439292	4.34668e-15	0.519165	1.0686e-26	-0.958457	3.84852e-75
CL2219.Contig2_All	1.71	2.48	1.57	3.2	2.72	3.07	2.47	2.85	3.55	0.36	1.21	0.85	-1.2533	1.35302e-79	0.645737	1.9726e-41	0.627869	6.38142e-39	-1.89903	2.53733e-225	-0.0178679	0.173648	-1.88117	1.0886e-218
CL13587.Contig23_All	0.7	0.6	0.64	1.33	0.65	0.46	0.43	1.09	0.8	0.52	0.41	0.88	-0.0867121	0.121479	0.339605	0.00174226	0.272264	0.00903838	-0.426317	9.94778e-05	-0.067341	0.14672	-0.358976	0.00123907
CL2558.Contig2_All	0.54	0.76	0.7	1.94	1.28	1.18	0.29	0.68	1.07	0.26	0.52	0.64	-0.485812	0.0101504	1.14254	3.20734e-11	0.0419182	0.224112	-1.62835	2.27144e-18	-1.10062	1.29368e-10	-0.52773	0.0066976
CL7176.Contig2_All	1.96	3.66	1.03	2.4	3.68	2.57	2.59	2.29	2	1.36	3.87	2.35	0.198645	0.0258227	0.384732	0.000340751	0.0626552	0.168977	-0.186087	0.0166057	-0.322077	0.00182175	0.135989	0.0668171
CL5168.Contig11_All	7.01	5.44	4.93	7.46	8.52	7.08	4.74	6.61	6.39	3.37	5.53	4.86	-0.333952	2.92498e-16	0.409781	1.33291e-29	0.036776	0.101655	-0.743733	4.28961e-84	-0.373005	5.19932e-25	-0.370728	1.04586e-19
CL12748.Contig100_All	0.92	0.73	0.52	1.02	0.84	0.76	1.2	1.64	1.43	0.46	1.69	1.56	0.771412	6.71736e-18	0.269504	0.00229074	0.977747	3.84314e-29	0.501909	1.46524e-09	0.708243	1.53905e-17	-0.206335	0.0022786
CL9139.Contig1_All	11.22	21.49	9.39	22.67	20.58	14.41	13.63	16.5	32.92	8.22	18.97	24.86	0.327908	6.73518e-09	0.461495	2.81483e-16	0.601849	1.64058e-27	-0.133586	0.00241931	0.140355	0.00226976	-0.273941	7.40048e-08
CL8761.Contig10_All	8.28	7.21	8.17	9.67	8.99	7.63	9.22	8.85	8.39	4.18	8.84	8.13	-0.155367	0.000200049	0.154374	0.000130484	0.168452	3.79557e-05	-0.309741	5.0454e-13	0.0140775	0.18611	-0.323819	9.04487e-14
Unigene12568_All	0.65	0.58	0.44	1.02	1.28	1.59	0.45	0.94	1.01	0.17	0.44	0.18	-1.06955	1.05281e-11	1.21357	1.80114e-29	0.528525	6.61884e-06	-2.28312	4.52446e-70	-0.685048	2.34002e-12	-1.59808	5.17013e-28
CL7937.Contig10_All	7.12	4.73	6.45	3.72	2.34	4.44	2.02	4.05	3.15	3.11	4.98	5.78	-0.395232	6.79556e-22	-0.799394	2.17419e-72	-0.980102	3.69327e-101	0.404161	5.23806e-18	-0.180708	0.00025356	0.584869	7.11454e-33
CL16834.Contig11_All	4.49	3.33	3.94	2.28	2.48	3.46	1.01	2.12	2	1.71	3.88	2.8	-0.483907	5.40087e-23	-0.515426	2.41433e-25	-1.18828	1.98734e-100	0.0315188	0.0894195	-0.672852	3.212e-28	0.704371	2.54445e-31
CL16531.Contig3_All	1.53	1.44	3.48	2.17	2.69	2.23	1.99	1.56	2.07	0.76	1.72	1.42	-0.718075	2.90008e-10	0.138477	0.0494332	-0.18984	0.024819	-0.856551	1.21977e-14	-0.328316	0.000623019	-0.528235	4.61502e-06
CL15838.Contig2_All	4.18	5.87	3.5	8.86	9.17	7.1	5.56	7.38	7.33	1.93	5.11	4.43	-0.232253	0.000423321	0.894334	2.29989e-51	0.591798	2.59816e-21	-1.12659	3.91648e-75	-0.302537	9.45305e-09	-0.824051	7.00068e-37
Unigene26532_All	1.18	0.97	0.94	2.04	1.19	1.57	0.66	1.08	0.89	0.32	0.42	0.43	-1.41155	1.9488e-19	0.635757	5.16211e-09	-0.225889	0.0264988	-2.04731	4.36971e-48	-0.861646	5.7476e-14	-1.18567	2.89137e-13
CL3597.Contig1_All	0.21	0.11	0.2	0.22	0.17	0.08	0.14	0.48	0.52	0.03	0.06	0.1	-1.38054	7.91015e-05	-0.124795	0.173483	1.14778	1.05455e-06	-1.25575	0.000212683	1.27258	1.39469e-07	-2.52833	1.01692e-16
CL2953.Contig4_All	2.39	2.11	2.22	2.31	2.06	1.65	1.65	1.8	1.16	1.14	2.43	1.66	-0.35291	0.000134133	-0.154089	0.0332719	-0.534117	1.09286e-07	-0.198822	0.00924791	-0.380028	0.000136667	0.181207	0.0277167
CL8727.Contig3_All	0.43	0.5	0.18	1.34	0.52	0.77	0.25	0.61	0.62	0.22	0.47	0.43	0.0306175	0.204286	1.25581	2.26628e-10	0.433739	0.0207344	-1.2252	2.12509e-10	-0.822075	5.01154e-06	-0.403121	0.0232158
CL1547.Contig12_All	4.84	8.31	4.2	11.98	8.4	6.29	21.03	10.49	9.64	8.34	12.45	15.4	1.06905	5.20092e-109	0.624616	5.33517e-33	1.25186	5.89102e-157	0.444433	3.51098e-25	0.627241	4.72014e-50	-0.182807	1.13849e-06
CL9532.Contig2_All	1.86	1.12	1.02	0.72	1.12	1.08	0.3	0.32	0.37	0.87	1.18	0.59	-0.600855	9.44952e-06	-0.456669	0.000411707	-2.0031	3.75625e-28	-0.144186	0.0577734	-1.54643	3.34978e-15	1.40224	2.05499e-12
Unigene65744_All	61.52	64.21	82.54	74.22	50.4	59.91	88.64	104.47	91.71	65.65	75.85	87.24	0.140943	2.52579e-23	-0.171719	3.62207e-30	0.459551	1.00737e-253	0.312662	2.36334e-101	0.63127	0	-0.318608	1.51905e-129
CL1082.Contig37_All	2.97	2.79	2.35	2.12	5.5	6.03	0.97	3.75	2.99	1.21	1.16	0.95	-1.2821	1.8361e-51	0.751488	4.43015e-36	-0.0596851	0.113699	-2.03359	6.37585e-164	-0.811173	1.06239e-40	-1.22242	8.2805e-46
CL4559.Contig6_All	0.5	0.58	0.71	0.78	0.47	0.65	0.49	0.45	0.38	0.59	0.63	0.66	0.0628721	0.135638	0.0831943	0.121455	-0.439141	0.000123984	-0.0203223	0.131749	-0.522335	5.62909e-06	0.502013	1.06683e-05
CL9346.Contig9_All	1.41	1.06	0.48	1.08	2.44	2.05	0.23	0.75	0.83	0.22	0.39	0.24	-1.78167	2.45219e-47	0.915134	3.55888e-32	-0.696706	7.40252e-12	-2.6968	4.48947e-145	-1.61184	2.41885e-75	-1.08496	4.52908e-15
CL2100.Contig7_All	0.77	0.86	0.77	0.84	1.14	1.18	0.82	0.74	1.6	0.44	0.63	0.79	-0.364616	1.77667e-05	0.396011	2.41967e-07	0.397276	2.41627e-07	-0.760628	3.09802e-20	0.00126499	0.239851	-0.761893	6.22096e-20
Unigene54425_All	0.89	0.45	0.4	0.35	0.34	0.7	0.25	0.87	0.99	0.69	1.17	0.33	0.348871	0.072094	-0.31967	0.104897	0.309108	0.102687	0.668542	0.00933845	0.628778	0.0222696	0.0397631	0.211531
Unigene41959_All	2.24	1.64	2.2	2.57	2.55	3.05	0.8	1.64	2.29	0.52	1.34	1.12	-1.02793	1.54664e-30	0.42877	4.85401e-10	-0.353471	5.05407e-06	-1.4567	7.86402e-69	-0.782241	7.52094e-26	-0.674462	9.62582e-13
CL12901.Contig5_All	2.93	3.71	1.88	3.96	8.33	6.79	2.65	2.76	5.92	1.57	2.76	3.02	-0.20992	6.70717e-06	1.16334	5.14928e-200	0.413163	4.83985e-21	-1.37325	2.43488e-260	-0.750173	2.30973e-96	-0.623082	1.12641e-42
CL9455.Contig8_All	3	2.51	2.69	2.42	3.86	3.91	1.83	3.55	2.48	1.49	3.09	2.62	-0.18256	0.000786181	0.313168	7.71523e-09	-0.0528309	0.108994	-0.495729	9.36517e-19	-0.365999	3.52881e-11	-0.129729	0.00999517
Unigene1740_All	28.82	23.09	22.11	19.91	36.37	26.65	10.04	25.12	22.36	7.28	21.73	15.29	-0.731136	2.76649e-83	0.166875	1.39998e-07	-0.348365	9.51122e-23	-0.89801	2.97881e-132	-0.51524	3.57959e-50	-0.38277	1.40312e-21
CL2448.Contig12_All	2.62	2.02	2.93	1.54	1.56	3.07	0.47	1.99	1.63	0.84	0.92	1.07	-1.41356	1.15472e-91	-0.294028	1.61853e-07	-0.879384	2.92943e-43	-1.11953	4.87828e-53	-0.585356	2.18587e-18	-0.534177	2.66872e-11
CL1136.Contig27_All	0.24	0.22	0.22	0.26	0.3	0.15	0.36	0.43	0.32	0.09	0.35	0.41	0.302881	0.0402739	0.0581371	0.19811	0.698175	0.000181429	0.244744	0.040856	0.640038	0.000440573	-0.395294	0.0106447
CL6498.Contig3_All	0.55	0.55	0.5	1.03	0.5	0.72	0.53	0.44	0.41	0.18	0.47	0.18	-0.934964	0.00117052	0.499382	0.0150811	-0.195693	0.140185	-1.43435	2.74522e-07	-0.695075	0.00276529	-0.739271	0.00815397
CL6718.Contig10_All	5.16	4.24	5.35	5.93	5.83	6.19	0.88	2.98	4.04	1.53	1.71	0.58	-1.94477	2.57334e-88	0.285555	8.09493e-06	-0.888006	1.3638e-27	-2.23033	1.20354e-127	-1.17356	2.2819e-51	-1.05677	1.42614e-20
Unigene13425_All	1.98	2.87	1.19	4.67	6.71	5.15	1.56	2.71	4.2	0.52	1.54	2.24	-0.476916	9.1754e-05	1.45698	9.31669e-55	0.500078	2.97282e-06	-1.9339	1.09139e-81	-0.956907	7.60687e-29	-0.976994	2.11218e-16
CL14485.Contig2_All	12.73	7.89	15.2	9.72	8.72	8.76	10.58	11.55	11.08	13.1	20.28	18.9	0.554822	4.91447e-39	-0.393103	3.45555e-15	-0.096841	0.0147817	0.947925	1.05909e-96	0.296262	4.0883e-09	0.651663	3.60805e-51
CL5958.Contig1_All	3.18	4.97	1.68	6.26	10.69	8.66	2.93	5.92	1.74	2.52	0.7	3.19	-0.6062	2.50424e-14	1.38354	7.83511e-130	0.122228	0.0284364	-1.98974	5.55436e-218	-1.26131	3.20379e-112	-0.728428	1.70371e-20
Unigene9972_All	3.49	3.27	2.23	3.93	2.79	2.24	4.58	3.06	3.3	1.8	3.08	2.55	-0.269229	0.000321718	-0.00139408	0.239817	0.289966	4.17694e-05	-0.267835	0.000212008	0.29136	3.81449e-05	-0.559195	3.03562e-13
Unigene36989_All	1.21	0.7	1.41	1.92	1.08	1.24	0.54	0.91	1.38	0.62	1.47	1.28	0.0332469	0.191351	0.358634	0.00694696	-0.220097	0.0617617	-0.325387	0.00625287	-0.578731	0.000135933	0.253344	0.0381328
CL16445.Contig26_All	2.01	1.23	2.88	2.01	2.08	2.71	0.75	1.49	1.45	1.3	2.24	1.83	-0.180674	0.0353913	0.15421	0.0512222	-0.718503	2.95051e-08	-0.334883	0.00083716	-0.872713	7.61407e-12	0.53783	3.0591e-05
CL7737.Contig10_All	0.76	1.47	1.56	1.9	2.04	1.5	2.46	2.11	2.4	1.1	2.63	3.44	0.93078	1.32578e-13	0.52545	5.25512e-05	0.890439	2.80964e-12	0.40533	0.000105	0.364989	0.000743364	0.0403411	0.172304
CL13534.Contig1_All	9.85	7.36	9.75	8.83	6.37	4.9	7.39	7.54	7.75	2.41	6.4	6.6	-0.793752	2.08407e-29	-0.41865	1.69084e-10	-0.23456	0.000120141	-0.375102	2.02546e-07	0.18409	0.00289589	-0.559191	2.0481e-14
CL1714.Contig1_All	0.48	0.35	0.53	0.58	0.7	0.42	0.39	1	0.93	0.26	0.7	0.72	0.301138	0.0451079	0.318889	0.0441422	0.771186	6.9251e-05	-0.0177513	0.143161	0.452297	0.00661531	-0.470048	0.00478004
CL1698.Contig11_All	1.29	1.46	1.06	2.61	1.6	2.06	1.62	2.2	1.79	0.77	1.34	2.11	0.167227	0.0669311	0.725686	4.43457e-08	0.575721	1.68e-05	-0.558459	4.95927e-06	-0.149965	0.0643919	-0.408494	0.000870942
CL238.Contig14_All	20.41	19.99	20.42	23.41	19.96	19.62	25.06	28.2	26.17	16.08	29.13	36.95	0.442484	9.46364e-52	0.0539179	0.0267216	0.394903	1.58157e-40	0.388566	2.37442e-41	0.340985	3.6422e-31	0.0475805	0.0239152
CL5146.Contig8_All	16.31	10.8	15.54	11.03	8.73	9.26	5.12	9.12	10.38	8.67	14.32	10.01	-0.363465	9.4358e-20	-0.552062	4.09852e-40	-0.781164	2.14661e-72	0.188597	4.76326e-06	-0.229102	8.16305e-07	0.417699	9.0383e-20
CL465.Contig59_All	4.11	4	3.72	5.42	1.97	2.66	8.94	5.06	6.16	4.75	10.6	5.69	0.834691	4.12076e-55	-0.229026	0.000156006	0.773484	3.75312e-46	1.06372	5.55387e-82	1.00251	1.91506e-70	0.0612073	0.0524121
CL1970.Contig11_All	1.12	1.69	0.64	1.54	1.93	1.13	0.43	1.33	1.57	0.49	0.84	0.6	-0.831637	3.21162e-10	0.416471	5.55222e-05	-0.0412932	0.197088	-1.24811	8.27169e-24	-0.457765	1.41267e-05	-0.790344	3.03785e-09
CL6427.Contig6_All	2.2	1.68	1.46	4.1	1.97	2.65	3.01	4.19	3.81	0.66	2.12	2.32	-0.0602723	0.115321	0.713925	2.78276e-22	1.05295	1.1855e-51	-0.774197	7.26071e-26	0.339028	1.99033e-08	-1.11323	1.12613e-56
CL16214.Contig17_All	2.97	2.07	2.43	2.83	2.48	5.85	0.87	2.62	3.84	0.93	1.33	1.13	-1.13762	1.0623e-43	0.579688	2.07766e-21	-0.0207873	0.204794	-1.7173	1.45923e-118	-0.600475	1.44655e-22	-1.11683	1.09863e-41
Unigene2794_All	1.25	1.45	1.09	2.05	0.83	1.09	2.84	1.23	2.6	1.49	4.56	2.45	1.17876	9.78595e-17	0.0705916	0.174865	0.827327	3.27088e-08	1.10817	1.37992e-15	0.756735	2.72548e-07	0.351433	0.00158999
CL16529.Contig1_All	0.36	0.88	0.38	1.05	0.8	0.74	0.54	0.86	1.39	1.42	1.15	2.39	1.62704	1.47621e-14	0.682378	0.00250315	0.796918	0.000542096	0.944664	1.65751e-07	0.11454	0.156976	0.830124	3.63915e-06
CL6402.Contig9_All	1.65	0.51	1.92	1.11	0.75	1.13	0.43	0.67	0.95	2.69	6.95	6.29	1.97088	2.5538e-277	-0.441688	8.75115e-08	-0.983581	3.06883e-26	2.41256	0	-0.541893	3.63487e-08	2.95446	0
Unigene17167_All	0.55	0.24	0.33	0.63	0.52	0.59	0.26	0.43	0.45	0.1	0.11	0.07	-2.03444	2.48005e-18	0.639466	7.08841e-06	0.0328569	0.223924	-2.67391	1.49392e-37	-0.606609	1.77481e-05	-2.0673	5.96394e-19
CL5247.Contig31_All	10.87	4.59	7.45	3.81	4.07	2.71	1.75	3.45	3.1	5.06	6.34	4.77	-0.499701	3.25146e-45	-1.11149	3.43672e-174	-1.45693	8.00482e-264	0.611787	2.42326e-46	-0.345446	7.89573e-12	0.957233	2.31153e-97
CL1699.Contig17_All	6.53	6.06	6.17	6.39	7.86	6.95	3.39	6.24	6.4	3.61	5.58	4.22	-0.479322	1.12508e-16	0.178748	0.000246567	-0.215881	5.12652e-05	-0.658069	9.15758e-32	-0.394629	2.31695e-13	-0.26344	5.80596e-06
CL5607.Contig12_All	0.51	0.47	0.28	0.46	0.42	0.43	0.19	0.54	0.51	0.22	0.39	0.34	-0.404323	0.00342141	0.0595851	0.175113	-0.0219296	0.233605	-0.463908	0.000661542	-0.0815147	0.152088	-0.382393	0.00538912
CL14730.Contig2_All	12.96	11.32	11.58	13.55	14.54	10.84	15.91	17.64	18.16	5.48	12.06	12.32	-0.257215	2.2111e-10	0.121026	0.000695667	0.536718	6.14882e-50	-0.378241	2.75061e-21	0.415692	7.26777e-32	-0.793933	1.22689e-98
CL1128.Contig1_All	0.53	0.17	0.49	0.77	0.53	0.39	2.15	0.53	1.59	0.17	0.6	0.35	-0.0738197	0.184095	0.516831	0.0170554	1.84863	2.62995e-18	-0.590651	0.0053783	1.3318	4.86208e-12	-1.92245	2.45625e-19
CL11480.Contig9_All	1.93	0.77	2.01	2.66	1.35	1.32	0.52	2.31	1.78	1.42	2.5	3.26	0.613811	5.55891e-16	0.185657	0.00829381	-0.021102	0.215488	0.428154	1.98037e-09	-0.206759	0.00454434	0.634913	9.27957e-17
CL8981.Contig4_All	4.61	5.11	2.11	7.3	8.41	5.77	3.19	3.49	5	1.81	2.41	2.73	-0.763101	7.00492e-34	0.861631	6.06728e-73	-0.013851	0.214972	-1.62473	1.90093e-197	-0.875482	1.66592e-74	-0.74925	2.06091e-32
CL1222.Contig9_All	1.01	0.88	1.23	1.06	0.97	0.84	0.82	0.96	1.54	0.39	0.62	1.05	-0.588911	1.94902e-05	-0.120651	0.101678	0.0969762	0.131083	-0.46826	0.000339374	0.217627	0.0309596	-0.685887	7.4518e-07
CL11028.Contig2_All	2.98	2.79	3.63	0.6	0.78	1.17	0.34	0.67	0.28	1.33	2.87	2.33	-0.516196	3.24878e-06	-1.8785	1.81344e-37	-2.84711	3.76997e-60	1.3623	6.00587e-18	-0.968615	2.64907e-05	2.33092	9.91167e-35
Unigene54835_All	0.22	0.47	0.38	0.34	0.9	0.57	0.26	0.37	0.21	0.23	0.18	0.27	-0.631604	0.0120317	0.773866	0.000594929	-0.325501	0.0823287	-1.40547	5.84876e-08	-1.09937	1.00137e-05	-0.306103	0.0919639
Unigene7487_All	1.47	1.69	2.04	2.84	2.68	2.27	1.37	2.61	2.21	0.84	1.87	1.54	-0.286334	0.0011806	0.585501	3.10317e-12	0.265247	0.00125242	-0.871836	3.62312e-23	-0.320254	3.55177e-05	-0.551582	2.31726e-09
CL164.Contig15_All	6.82	5.87	5.16	9.25	7.73	7.68	4.27	4.42	8.93	3.56	8.06	6.05	-0.00705135	0.20547	0.47022	3.13893e-17	-0.0105001	0.228895	-0.477271	4.41746e-18	-0.48072	9.00112e-18	0.00344875	0.223533
CL15663.Contig3_All	10.95	11.52	11.4	7.45	10.63	21.74	5.57	7.1	11.25	3.07	5.16	5.21	-1.32602	5.07539e-149	0.234779	1.02653e-09	-0.493917	7.99153e-29	-1.56079	2.85613e-223	-0.728696	2.14539e-65	-0.832099	1.78581e-50
Unigene4460_All	0.49	0.56	0.33	0.85	0.7	0.9	0.53	1.04	1.02	0.38	0.66	0.49	0.159956	0.0877769	0.833363	2.76146e-08	0.913087	9.2116e-10	-0.673407	1.4094e-06	0.0797244	0.1436	-0.753131	1.32743e-07
CL15518.Contig2_All	4.7	3.99	4.04	2.25	2.85	4.76	3.09	5.07	2.14	2.23	3.61	3.48	-0.447902	3.65155e-29	-0.36635	1.74977e-20	-0.295763	3.04808e-14	-0.0815526	0.0101369	0.070587	0.0282604	-0.15214	0.000121021
CL1751.Contig7_All	2.71	3.46	1.83	5.13	7.06	4.7	6.34	6.83	4.31	3.03	3.22	3.58	0.303743	3.91402e-05	1.08104	6.95723e-56	1.13806	9.70891e-63	-0.7773	1.9697e-33	0.0570199	0.0874368	-0.83432	1.99332e-38
Unigene29954_All	1.47	0.65	0.74	0.78	1.53	1.4	0.32	1.06	0.94	0.28	0.44	0.22	-1.59064	7.34636e-42	0.378353	2.94359e-06	-0.284387	0.0010147	-1.969	5.95441e-72	-0.66274	3.90152e-14	-1.30626	3.39008e-26
Unigene57663_All	1.45	2.51	1.1	0.7	1.97	1.43	0.98	0.82	1.2	0.74	1.32	0.61	-0.920106	6.27785e-14	-0.302369	0.00247655	-0.749546	3.36511e-10	-0.617737	5.62146e-07	-0.447176	0.000189076	-0.17056	0.0618039
CL10617.Contig10_All	3.02	3.56	4.98	4.3	4.4	2.31	5.78	4.34	4.19	2.07	5.02	5.02	0.0766664	0.0869594	-0.0653259	0.11798	0.317925	2.45998e-05	0.141992	0.015215	0.383251	7.37615e-07	-0.241259	0.00065283
CL14623.Contig2_All	3.16	4.92	3.91	4.58	4.85	3.6	4.09	4.92	4.45	2.94	5.65	4.72	0.156506	0.00900334	0.123149	0.0284046	0.176299	0.00556292	0.0333565	0.101242	0.0531496	0.122555	-0.0197932	0.186407
CL8737.Contig2_All	3.61	2.58	2.55	2.74	2.71	3.24	1.02	1.94	2.56	1.18	2.1	1.29	-0.936606	6.26638e-48	-0.00633205	0.223155	-0.655789	1.76501e-26	-0.930274	1.74193e-47	-0.649457	6.69087e-26	-0.280817	4.11373e-05
CL738.Contig23_All	0.18	0.29	0.2	0.28	0.08	0.2	0.23	0.3	0.37	0.49	0.45	0.55	1.14943	1.14965e-09	-0.268952	0.0784105	0.436178	0.0159496	1.41838	6.34389e-13	0.70513	0.000831924	0.71325	2.70745e-05
CL6421.Contig29_All	55.95	80.18	61.4	68.64	42.81	23.96	77.31	50.37	64.01	62.9	136.48	116.33	0.683047	0	-0.540181	8.78018e-187	-0.0374456	0.00989608	1.22323	0	0.502735	3.9679e-159	0.720492	0
CL10736.Contig4_All	3.96	3.05	3.09	3.63	3.32	6.54	1.76	3.54	4.12	1.38	2.27	2.7	-0.664485	1.30875e-21	0.419257	3.45742e-13	-0.0920713	0.0471715	-1.08374	1.05298e-62	-0.511328	4.31698e-18	-0.572414	5.57934e-16
CL8373.Contig2_All	1.19	0.6	0.89	1.75	1.37	1.24	1.01	1.42	1.79	0.37	0.68	0.36	-0.918418	6.727e-10	0.702965	5.30171e-10	0.661377	6.47099e-09	-1.62138	5.87283e-34	-0.0415878	0.175269	-1.5798	1.7601e-31
CL13594.Contig4_All	0.66	0.58	0.52	0.4	0.52	0.41	0.26	0.51	0.27	0.37	0.36	0.33	-0.734128	8.37835e-06	-0.396481	0.00531013	-0.759612	6.32655e-06	-0.337647	0.0122153	-0.363131	0.0167026	0.0254844	0.211501
CL13719.Contig2_All	21.84	12.58	22.41	4.35	11.11	13.91	7.17	8.67	10.12	4.36	17.75	12.75	-0.698481	8.69673e-85	-0.951345	6.49271e-142	-1.1211	1.04232e-184	0.252864	5.90639e-10	-0.169755	8.70452e-05	0.42262	2.21372e-22
Unigene37901_All	1.52	1.37	0.48	1.73	1.91	1.58	5.06	2.39	2.19	1.25	2.44	4.26	1.24389	2.5823e-50	0.632982	6.23706e-12	1.51765	2.47111e-80	0.610907	1.01473e-16	0.884665	5.60535e-35	-0.273758	8.5487e-06
CL10081.Contig3_All	0.88	0.71	0.65	1.42	0.8	1.57	0.58	1.42	0.65	0.18	0.24	0.48	-1.31592	1.16313e-08	0.759946	2.0456e-06	0.261768	0.0469922	-2.07586	4.43566e-24	-0.498178	0.000655689	-1.57769	1.74756e-12
CL13254.Contig2_All	2.01	2.35	2.05	2.99	2.31	1.01	7.51	4.56	4.8	2.56	6.04	5.78	1.17554	2.92823e-36	-0.0170797	0.217569	1.40595	1.53772e-54	1.19262	2.51604e-37	1.42303	2.19613e-55	-0.230403	0.000617872
CL14454.Contig28_All	0.24	0.26	0.33	0.3	0.32	0.16	0.11	0.15	0.15	0.09	0.17	0.09	-1.24829	5.61193e-09	-0.0835952	0.165526	-1.03455	5.50605e-07	-1.1647	4.20264e-08	-0.950959	4.76476e-06	-0.213737	0.107013
CL14556.Contig5_All	10.25	8.39	8.87	31.6	15.41	14.24	5.1	7.05	7.98	3.1	7.52	5.61	-0.748978	7.50042e-26	1.16127	1.13223e-112	-0.434883	9.72083e-11	-1.91025	6.80479e-235	-1.59615	4.23744e-181	-0.314094	1.93143e-05
CL2073.Contig9_All	5.05	4.86	5.84	6.72	6.4	6.59	5.37	6.29	5.42	2.35	6.47	4.71	-0.215491	6.33073e-06	0.325522	6.03094e-13	0.124009	0.00333179	-0.541013	8.3054e-31	-0.201513	3.20996e-06	-0.3395	2.35552e-12
CL6972.Contig9_All	0.43	0.73	0.43	0.55	0.62	0.79	0.51	0.69	0.77	0.1	0.25	0.18	-1.59031	3.27566e-13	0.301331	0.0188142	0.318858	0.0156608	-1.89164	6.46621e-20	0.0175272	0.223134	-1.90917	5.50885e-20
CL3285.Contig3_All	0.42	0.43	0.21	0.78	1.07	1.5	0.5	1.09	0.72	0.14	0.18	0.35	-0.652888	0.00788264	1.6606	3.44399e-17	1.13169	1.01512e-07	-2.31349	4.47838e-26	-0.528906	0.000473082	-1.78458	1.12874e-13
Unigene54884_All	0.27	0.18	0.23	0.32	0.41	0.92	0.23	0.45	0.41	0.54	0.36	0.31	0.834298	0.0188226	1.26529	0.00109592	0.690198	0.0454193	-0.430994	0.0405629	-0.575094	0.038738	0.1441	0.174523
Unigene31202_All	1.63	0.65	0.89	0.87	0.76	1.69	0.4	0.93	0.85	0.35	0.41	0.37	-1.48939	7.43913e-54	0.0632523	0.107401	-0.538314	3.51909e-11	-1.55265	6.94902e-60	-0.601567	9.42626e-14	-0.951079	2.12947e-19
CL9071.Contig1_All	30.23	37.91	34.93	23.75	44.75	34.21	14.15	24.78	28.55	31.84	52.29	56.21	0.453662	9.53191e-85	-0.00325681	0.220809	-0.599571	2.20464e-101	0.456919	4.0731e-86	-0.596314	5.5179e-100	1.05323	0
CL664.Contig33_All	0.5	0.26	0.21	0.47	0.63	0.49	0.31	0.63	0.44	0.14	0.19	0.15	-1.03499	5.63615e-05	0.733395	0.000116024	0.528469	0.00433877	-1.76838	6.21607e-14	-0.204927	0.0759109	-1.56346	2.05802e-10
CL16441.Contig10_All	1.03	0.95	2.07	2.7	0.76	1.63	1.01	1.01	1.78	0.38	0.78	1.06	-0.859014	1.19514e-11	0.335289	0.000542381	-0.082717	0.133483	-1.1943	2.56405e-23	-0.418006	3.89412e-05	-0.776297	1.43429e-09
CL16127.Contig2_All	20.45	25.28	21.32	23.46	30.37	19.88	28.12	24.58	21.05	16.58	25.27	23.99	-0.010239	0.188223	0.143215	0.000534728	0.157039	0.000190501	-0.153454	0.000128688	0.0138245	0.189452	-0.167278	6.96387e-05
Unigene66230_All	0.52	0.33	0.13	0.39	0.46	0.73	0.39	0.71	0.79	0.2	0.19	0.38	-0.335627	0.131778	0.68033	0.0442241	0.963217	0.0111354	-1.01596	0.00748669	0.282887	0.128152	-1.29884	0.00206079
CL9466.Contig1_All	10.46	21.68	11.12	14.18	20.94	27.58	8.96	13.46	21.22	4.99	6.11	8.24	-1.15111	1.45211e-108	0.53762	2.32607e-43	0.0239992	0.160473	-1.68873	8.33712e-279	-0.51362	7.63993e-40	-1.17511	1.70485e-113
Unigene38165_All	0.37	0.57	0.5	0.23	0.3	0.27	0.13	0.2	0.37	0.16	0.33	0.26	-0.917958	0.00363318	-0.848551	0.00646179	-1.01488	0.00246983	-0.0694072	0.134256	-0.166327	0.178382	0.0969203	0.195927
CL4824.Contig4_All	9.27	11.7	10.33	16.29	9.12	12.27	16.04	18.87	20.84	6.67	9.91	14.72	0.00745911	0.193238	0.270621	2.12059e-13	0.840702	3.0504e-137	-0.263162	3.51455e-13	0.570082	4.88799e-70	-0.833243	7.0977e-136
CL6980.Contig4_All	0.49	0.34	0.9	0.34	0.24	0.4	0.83	0.58	0.43	0.58	0.89	0.94	0.478753	0.000538891	-0.813832	8.53826e-06	0.0925633	0.159506	1.29259	4.02487e-14	0.906395	6.76805e-07	0.38619	0.0032221
Unigene33686_All	2.77	3.3	2.6	4.43	3.99	3.68	3.22	3.08	2.76	1.56	3.68	3.09	-0.0545011	0.0869012	0.482873	6.23488e-20	0.0689	0.0700532	-0.537374	2.69172e-24	-0.413973	2.21914e-15	-0.123401	0.00973865
CL1942.Contig8_All	1.78	1.42	1.51	1.59	1.95	2.16	0.5	1.3	1.53	0.67	1.08	0.93	-0.808075	5.61432e-20	0.278793	6.69656e-05	-0.488239	4.10951e-09	-1.08687	3.7889e-38	-0.767031	1.26221e-21	-0.319836	0.000350055
CL155.Contig3_All	0.7	2.96	2.6	7.31	4.03	3.09	4.54	4.89	6.11	1.92	1.55	2.84	0.0129907	0.186319	1.20707	4.79236e-159	1.31433	1.05402e-194	-1.19408	1.47146e-157	0.107256	0.00107692	-1.30134	1.02866e-192
CL7781.Contig5_All	1.22	1	0.5	1.93	1.3	0.44	3.65	1.6	1.65	1.21	1.68	1.79	0.790631	1.22161e-07	0.438986	0.00270882	1.35335	4.05848e-22	0.351646	0.00266124	0.914365	1.35445e-12	-0.56272	1.7313e-06
CL17229.Contig11_All	14.92	12.57	16.23	37.68	18.26	22	40.03	41.85	26.42	7.94	21.72	13.55	-0.0124852	0.161516	0.838311	4.96183e-208	1.31672	0	-0.850796	9.227e-215	0.478413	3.3325e-107	-1.32921	0
CL1101.Contig2_All	15.24	25.33	17.28	22.39	18.08	13.13	23.63	22.47	26.08	16.4	32.21	30.36	0.456378	7.95688e-53	-0.106571	0.000490775	0.327686	1.02225e-26	0.562949	7.79829e-77	0.434257	7.74332e-44	0.128692	2.27455e-06
CL1871.Contig18_All	3.19	2.55	2.5	6.45	4.52	4.7	4.69	4.7	5.44	1.55	4.33	2.68	0.0604231	0.0920772	0.930447	1.26074e-57	0.854354	1.65307e-47	-0.870024	2.63365e-52	-0.0760938	0.0393483	-0.79393	2.37297e-42
CL1093.Contig2_All	5.78	3.54	2.5	7.12	5.19	7.36	8.61	7.88	9.72	3.12	8.08	10.58	0.896037	1.47736e-32	0.739407	1.72351e-21	1.16256	7.30775e-58	0.156631	0.00354218	0.423153	2.06996e-11	-0.266523	6.96864e-06
CL3706.Contig3_All	0.3	0.7	0.36	1.95	1.24	1.14	0.64	1.62	2.32	0.8	2.07	1.73	1.75773	5.065e-48	1.66692	8.86806e-42	1.75346	3.12801e-47	0.09081	0.0525103	0.086539	0.0948476	0.00427099	0.224961
CL7733.Contig3_All	0.09	0.19	0.29	0.38	0.74	0.47	0.64	0.55	1.4	0.28	0.36	0.53	1.10178	0.029752	1.50476	0.0066843	2.23452	3.86533e-05	-0.40298	0.0729185	0.729761	0.0296159	-1.13274	0.0050069
Unigene65492_All	8.25	22.36	31.54	35.23	22.23	13.87	9.49	18.6	17.2	5.87	11.28	7.96	-1.30179	7.73841e-249	0.203025	6.67041e-12	-0.444519	3.23909e-40	-1.50482	0	-0.647544	4.97889e-89	-0.857275	3.1034e-93
CL1432.Contig7_All	12.74	9.44	13.65	16.13	22.08	17.67	5.03	11.29	12.02	6.96	14.05	11.42	-0.135419	0.0011789	0.644046	2.99867e-56	-0.32467	1.09516e-11	-0.779465	1.09723e-78	-0.968716	2.71497e-111	0.189251	4.86117e-05
Unigene13735_All	3.92	1.21	4.33	2.45	2.25	5.96	2.57	5.76	4.85	1.06	4.42	3.96	0.000423874	0.220981	0.1733	0.00197645	0.488079	9.59872e-17	-0.172876	0.00107842	0.314778	2.14749e-08	-0.487655	7.54131e-17
CL403.Contig10_All	0.26	0.15	0.36	0.28	0.2	0.31	0.14	0.31	0.16	0.18	0.18	0.23	-0.388494	0.031728	0.052178	0.20426	-0.312176	0.0634608	-0.440672	0.0130697	-0.364354	0.0407722	-0.0763182	0.184756
Unigene65387_All	0.59	0.98	0.48	0.94	2.12	2.2	0.7	0.7	0.78	0.14	0.21	0.32	-1.60359	2.03127e-11	1.36082	7.48722e-21	0.097176	0.165232	-2.96441	3.25757e-54	-1.26364	1.06506e-18	-1.70076	6.72198e-13
Unigene19324_All	0.91	0.98	1.19	0.37	0.76	0.62	0.25	0.23	0.54	0.52	1.15	1.15	-0.115321	0.133418	-0.811929	0.000110203	-1.58536	2.9335e-10	0.696608	0.000436212	-0.773436	0.00306252	1.47004	7.05992e-09
CL3089.Contig17_All	1.43	0.61	1.11	1.36	2.11	1.68	0.56	1.03	1.31	0.43	0.18	0.16	-2.02529	1.64148e-26	0.710007	1.36944e-09	-0.110611	0.122219	-2.73529	1.59173e-59	-0.820618	9.49549e-12	-1.91468	6.03466e-23
CL10089.Contig2_All	0.7	0.64	0.79	1.28	1.34	1.22	0.84	1.34	1.1	0.52	0.76	0.82	-0.0171991	0.199285	0.850051	6.47859e-19	0.626366	2.26017e-10	-0.86725	6.02082e-20	-0.223686	0.00346903	-0.643565	6.72915e-11
Unigene38646_All	0.37	0.75	0.47	1.47	1.86	1.1	1.11	1.73	1.68	0.1	0.22	0.24	-1.48318	2.45428e-09	1.49054	9.3441e-23	1.5287	4.72693e-24	-2.97373	3.01449e-52	0.0381577	0.188047	-3.01189	1.1e-53
Unigene16331_All	4.19	4.39	4.39	5.54	2.79	1.88	4.53	5.9	4.41	8.73	14.25	14.55	1.53548	0	-0.341555	4.45011e-14	0.200283	7.4197e-07	1.87703	0	0.541838	1.23742e-34	1.3352	0
Unigene49818_All	3.13	3.24	3.25	3.75	4.6	4.59	4.49	5.69	5.73	2.41	3.95	3.58	0.0521721	0.103039	0.429921	8.24041e-13	0.734257	3.01333e-37	-0.377749	8.10094e-11	0.304336	7.10554e-09	-0.682085	3.76391e-33
Unigene15801_All	0.15	0.31	0.26	0	0	0	0	0	0	0	0	0	-6.80108	1.41406e-14	-6.78512	1.94923e-14	-6.77525	2.17821e-14
CL2116.Contig1_All	1.24	0.51	0.82	0.54	0.89	0.72	0.21	0.49	0.63	0.52	0.6	0.36	-0.789413	6.47663e-09	-0.259696	0.0134794	-0.93874	3.69848e-11	-0.529717	6.09793e-05	-0.679044	2.94925e-06	0.149326	0.0944924
CL9736.Contig1_All	1.72	1.64	1.91	1.96	2.69	3.2	1.35	2.33	1.92	0.57	1.27	1.47	-0.666633	2.07418e-11	0.575257	1.17889e-12	0.0981491	0.0818553	-1.24189	2.13388e-42	-0.477108	1.76354e-09	-0.764782	9.16526e-15
Unigene91543_All	3.48	6.49	5.77	9.63	7.38	5.14	11.79	11.99	10.39	2.83	3.6	7.87	-0.125795	0.0229026	0.496757	1.84901e-14	1.13005	7.98221e-83	-0.622552	2.93541e-21	0.633296	5.51101e-32	-1.25585	4.18502e-98
Unigene39072_All	5.57	2.48	7.41	9.31	11.15	6.92	8.25	4.57	4.4	5.65	9.16	10.06	0.695081	3.43569e-30	0.828246	1.32085e-43	0.16292	0.00566927	-0.133165	0.00229994	-0.665326	3.3167e-30	0.532161	2.38384e-19
CL11972.Contig3_All	23.93	11.25	11.52	20.73	19.59	17.84	25.03	32.58	33.1	17.25	28.15	26.42	0.631105	1.15725e-62	0.321145	6.69006e-16	0.971137	2.65104e-162	0.30996	1.43929e-18	0.649991	5.78638e-82	-0.340031	1.75142e-26
CL7322.Contig8_All	0.88	1.49	1.27	1.88	2.49	2.47	2.36	0.97	1.23	0.67	0.93	0.92	-0.530561	1.71863e-06	0.908679	5.37486e-24	0.323814	0.00049571	-1.43924	1.08879e-48	-0.584864	4.74786e-12	-0.854375	3.2119e-15
CL16932.Contig2_All	1.84	1.7	2.35	1.45	2.23	0.9	0.73	1.74	0.91	1.3	2.73	2.59	0.177919	0.0232966	-0.359625	0.000598152	-0.784044	8.86659e-11	0.537544	2.42378e-07	-0.424419	0.000451832	0.961963	2.69138e-16
Unigene13447_All	1.48	1.34	1.96	1.65	2.02	2.1	0.44	1.94	1.87	0.91	1.8	1.36	-0.219076	0.0441821	0.274962	0.0189943	-0.150239	0.1008	-0.494037	0.000232658	-0.425201	0.00174822	-0.0688364	0.163936
Unigene64253_All	1.53	2.21	2.83	2.53	4.19	3.11	2.85	2.89	3.47	1.28	2.91	2.92	0.11556	0.0110033	0.57997	1.96677e-29	0.491967	4.91164e-21	-0.464411	1.03414e-20	-0.0880038	0.0202386	-0.376407	1.20146e-13
Unigene49004_All	3.64	3.78	3.22	1.53	3.26	2.65	1.35	3.8	2.9	2.09	4.1	3.48	-0.132061	0.0255324	-0.515965	5.40001e-10	-0.389431	1.2381e-06	0.383904	1.97249e-06	0.126534	0.0481944	0.25737	0.000805112
Unigene57912_All	198.37	106.76	250.98	169.29	96.49	136.52	225.12	195.46	198.77	131.52	215.01	193.58	-0.0338174	0.000872431	-0.462798	0	0.165153	8.74276e-52	0.428981	1.23544e-272	0.627951	0	-0.198971	6.96899e-74
Unigene8561_All	2.67	5.64	6.52	8.65	5.43	6.58	11.04	11.8	12.58	5.36	3.4	10.77	0.402278	2.99001e-26	0.480949	2.3919e-37	1.26011	0	-0.0786716	0.00466417	0.779156	2.20518e-145	-0.857828	2.26238e-172
Unigene1839_All	1.18	1.55	1.57	2.48	1.97	1.79	6.59	3.08	3.98	1.65	1.03	2.21	0.242641	0.111734	0.560253	0.0221865	1.73702	4.15574e-12	-0.317612	0.0475538	1.17677	1.56039e-07	-1.49438	3.38789e-10
CL14.Contig1_All	3.33	3.67	2.82	6.35	5.11	4.09	6.96	6.47	5.4	3.5	4.48	6.11	0.532669	6.59345e-10	0.668146	5.83109e-15	0.95228	3.98205e-31	-0.135477	0.0149057	0.284134	4.57924e-05	-0.419611	9.48387e-09
CL17010.Contig2_All	0.66	0.77	1.04	0.47	0.93	1.09	0.51	0.72	0.67	0.4	0.59	0.28	-0.949862	2.90797e-10	0.00700021	0.233706	-0.368662	0.00311218	-0.956862	1.21135e-10	-0.375662	0.00257253	-0.581199	0.000147934
CL8978.Contig4_All	0.51	0.66	0.29	1.08	1.59	1.35	0.58	0.82	0.7	0.29	0.45	0.42	-0.327572	0.0298353	1.46403	2.00288e-22	0.53645	0.000997767	-1.79161	7.29426e-30	-0.927585	9.85424e-12	-0.864022	1.6801e-06
CL2819.Contig3_All	40.31	59.86	42.17	69.41	73.94	65.47	59.16	70.07	74.15	24.95	45.79	52.87	-0.192562	7.22325e-15	0.556638	3.10545e-141	0.527385	2.69024e-125	-0.749199	9.44241e-240	-0.0292522	0.0439539	-0.719947	3.04098e-218
CL2073.Contig3_All	4.41	2.39	3.32	2.32	2.78	3.73	0.92	3.16	2.25	1.11	2.69	1.37	-0.958737	1.90257e-22	-0.193934	0.00859076	-0.6614	1.47066e-12	-0.764802	2.22666e-14	-0.467466	8.23075e-07	-0.297337	0.00247447
CL15500.Contig17_All	0.62	0.61	0.43	0.6	0.6	0.89	0.59	1.22	0.85	0.44	1.32	0.57	0.492828	0.000359706	0.330979	0.0108515	0.687483	1.24772e-06	0.16185	0.0428917	0.356504	0.00351605	-0.194654	0.04073
CL11424.Contig1_All	1.42	2.97	2.69	8.88	4.67	2.77	8.76	8.08	6.9	1.83	5.67	6.31	0.975073	2.93296e-29	1.20966	3.49736e-47	1.7566	4.38483e-117	-0.234583	0.000191637	0.546944	8.48232e-19	-0.781527	5.1031e-34
CL9827.Contig2_All	2.37	3.39	1.72	3.54	3.8	3.14	4.71	3.45	3.37	1.99	2.32	3.76	0.123237	0.0744756	0.490926	3.94653e-06	0.637231	1.87396e-09	-0.36769	0.000137752	0.146305	0.0419849	-0.513995	4.54637e-07
Unigene38499_All	4.35	3.27	3.96	8.99	8.83	7.68	5.91	9.65	9.32	0.84	2.42	1.99	-1.13789	3.76155e-51	1.1411	2.72161e-110	1.11282	1.19812e-103	-2.27899	1.4421e-295	-0.0282773	0.134274	-2.25071	3.14879e-284
CL9194.Contig3_All	12.79	21.75	17.54	38.48	31.7	32.11	37.72	51.9	53.47	10.38	13.76	21.5	-0.176484	3.24746e-05	0.978567	4.37874e-155	1.47314	0	-1.15505	3.88994e-204	0.494574	1.13951e-66	-1.64963	0
CL3169.Contig7_All	11.36	10.9	10.44	11.34	20.8	12.15	6.57	6.97	9.52	4.69	7.19	5.15	-0.933439	2.14381e-60	0.440504	1.06791e-22	-0.494146	9.33976e-21	-1.37394	8.65295e-150	-0.93465	1.75862e-80	-0.439293	9.20351e-13
CL15162.Contig2_All	2	1.65	1.82	2.73	2.84	2.32	1.18	1.9	2.61	0.59	1.37	1.12	-0.823024	5.30682e-19	0.530955	3.84363e-13	0.0665826	0.118322	-1.35398	1.03403e-57	-0.464373	1.25609e-10	-0.889607	3.24716e-22
CL1525.Contig8_All	13.27	22.13	8.08	11.25	22.32	16.82	3.06	6.04	4.03	3.62	3.37	2.04	-2.25794	3.56376e-208	0.216546	2.94554e-06	-1.70836	2.17978e-143	-2.47448	3.66723e-269	-1.92491	2.96338e-195	-0.549577	1.32446e-08
CL10497.Contig4_All	3.64	7.8	2.76	14.26	8.89	7.74	7.96	12.48	10.02	2.85	4.24	8.1	0.119734	0.0645197	1.12794	9.27321e-38	1.12412	2.34821e-37	-1.00821	2.72122e-32	-0.00381554	0.234015	-1.00439	1.37816e-31
CL712.Contig3_All	7.98	7.43	7.54	7.84	6.83	10.7	5.93	6.58	6.45	3.67	5.85	5.21	-0.638229	8.05844e-86	0.145591	1.59879e-07	-0.271876	5.63292e-19	-0.78382	2.71901e-135	-0.417468	3.20765e-44	-0.366352	5.98155e-27
CL1686.Contig4_All	0.71	0.4	0.49	0.75	0.33	1.04	0.58	0.7	0.71	0.21	0.16	0.12	-1.69821	1.2505e-18	0.404692	0.00104867	0.317587	0.00754658	-2.1029	1.18044e-31	-0.0871054	0.132678	-2.01579	4.84036e-28
Unigene41061_All	2.49	3.12	2.89	3.24	6.07	3.65	1.58	3.02	1.76	0.78	1.27	1.2	-1.37873	1.3427e-33	0.611605	3.34125e-14	-0.402181	1.58631e-05	-1.99033	9.32074e-84	-1.01379	3.39685e-31	-0.976544	1.16487e-15
Unigene37489_All	0.42	0.42	0.53	1.24	1.24	0.38	0.55	0.76	0.57	0.37	0.79	0.83	0.54711	0.00224833	1.07247	4.44855e-09	0.4802	0.00728526	-0.525356	0.000387734	-0.592266	0.000230422	0.0669095	0.174225
Unigene61412_All	0.48	0.48	0.36	1.06	0.39	0.52	1.03	1.25	0.71	0.18	0.7	0.71	0.278067	0.0705402	0.58722	0.00542434	1.19854	2.35612e-08	-0.309153	0.0309432	0.611319	0.000779662	-0.920472	4.06224e-06
Unigene66203_All	0.37	0.61	0.63	0.34	0.26	0.2	0.38	0.27	0.23	0.39	1.07	0.95	0.588677	0.000330129	-1.01892	7.26665e-06	-0.860031	8.25383e-05	1.6076	1.2323e-14	0.158888	0.147982	1.44871	1.53525e-12
CL15175.Contig21_All	7.26	8.18	11.39	29.98	12.31	15.19	29.28	23.88	32.38	7.91	7.18	13.82	0.114754	0.00127242	1.1036	3.2665e-237	1.67776	0	-0.98885	8.00116e-200	0.574154	4.14229e-115	-1.563	0
Unigene57259_All	0.99	1.34	0.93	1.42	0.99	1.52	0.99	1.24	1.14	0.59	1.31	1.42	0.0326118	0.157839	0.275518	9.48042e-05	0.0538477	0.139775	-0.242906	0.000222064	-0.22167	0.00108022	-0.0212359	0.187293
Unigene1222_All	1.24	0.89	0.85	2.03	2.61	1.77	0.6	1.47	0.62	0.18	0.62	0.37	-1.34992	1.05638e-17	1.10994	1.0445e-26	-0.136375	0.0878982	-2.45986	4.17398e-79	-1.24631	1.42188e-31	-1.21354	5.31904e-14
CL11733.Contig2_All	0.98	1	1.22	3.73	3.87	3.13	2.71	5.07	5.36	0.3	0.42	0.69	-1.17104	8.01915e-11	1.74783	4.60839e-56	2.049	2.61627e-84	-2.91887	1.44078e-103	0.301168	4.8152e-05	-3.22004	2.601e-138
CL15929.Contig2_All	28.72	37.6	28.46	51.97	48.8	40.94	45.35	46.07	52.26	21.92	40.97	45.19	0.206137	4.53204e-09	0.586307	1.48773e-67	0.618258	1.69453e-75	-0.380171	4.67986e-32	0.0319505	0.0827958	-0.412121	3.29048e-37
CL5556.Contig2_All	2.05	1.72	1.36	1.21	2.97	2.02	0.78	1.47	1.05	0.61	1.09	0.93	-0.955023	5.41648e-11	0.272849	0.00778105	-0.61987	4.81346e-06	-1.22787	1.12037e-18	-0.892718	1.60921e-11	-0.335153	0.0127856
Unigene4875_All	0.58	0.37	0.6	0.7	0.21	0.56	0.21	0.4	0.62	0.17	0.12	0.13	-1.89169	2.87715e-12	-0.0688088	0.185116	-0.338977	0.0350758	-1.82288	1.54732e-11	-0.270168	0.0598084	-1.55272	4.82702e-08
CL7452.Contig1_All	5	2.85	4.32	3.21	4.34	4.84	1.27	2.8	2.95	1.27	3.14	2.21	-0.87389	5.26516e-52	0.0261237	0.155291	-0.784346	4.42002e-43	-0.900014	8.39813e-56	-0.81047	3.60397e-46	-0.0895445	0.0485001
CL9599.Contig2_All	14.93	16.12	13.34	23.7	26.85	24.94	9.9	18.15	18.24	6.56	13.57	11.28	-0.48745	1.88548e-21	0.77021	9.88863e-77	0.0767022	0.0333531	-1.25766	7.4574e-172	-0.693508	7.48081e-64	-0.564152	1.26777e-28
CL3948.Contig3_All	1.73	0.76	1.25	2.21	1.58	2.81	1.18	1.95	1.32	0.21	0.31	0.57	-1.77228	8.52468e-15	0.827855	1.04193e-08	0.268471	0.0323644	-2.60013	4.28834e-39	-0.559385	3.25118e-05	-2.04075	1.53551e-20
Unigene11627_All	0.87	1.02	0.85	1.83	1.26	1.53	2.74	2.84	1.68	0.89	1.77	1.82	0.716411	3.62513e-08	0.755846	7.20445e-09	1.4194	5.99967e-33	-0.0394348	0.115296	0.663549	1.18478e-10	-0.702984	1.015e-11
Unigene1121_All	0.28	0.44	0.26	0.72	1.09	0.92	0.91	0.86	0.9	0.09	0.17	0.18	-1.14423	2.09767e-07	1.48718	6.72209e-25	1.45769	1.0848e-23	-2.63141	5.13919e-51	-0.029484	0.198501	-2.60193	6.33684e-49
CL6140.Contig1_All	59.16	25.91	66.99	35.26	13.31	25.73	37.72	31.54	36.01	34.33	75.93	55.04	0.127177	3.65758e-11	-1.02868	0	-0.522392	2.81793e-125	1.15586	0	0.506292	8.2744e-83	0.649569	2.19408e-202
CL12449.Contig3_All	0.73	1.4	0.51	1.42	1.91	2.32	0.82	1.88	1.88	0.29	0.37	0.55	-1.12246	3.70457e-12	1.09969	5.99951e-23	0.80667	4.67574e-12	-2.22215	6.53696e-61	-0.293021	0.0010156	-1.92913	1.07854e-41
CL1686.Contig8_All	0.67	0.56	0.29	0.52	0.58	0.57	0.4	0.66	0.63	0.24	0.5	0.34	-0.475417	0.00013841	0.134205	0.0759417	0.151554	0.0649174	-0.609622	7.87578e-07	0.0173485	0.217811	-0.626971	7.19117e-07
CL2372.Contig13_All	0.38	0.22	0.3	0.24	0.33	0.62	0.06	0.17	0.14	0.03	0.08	0.06	-2.34798	7.56706e-28	0.409237	0.00086179	-1.26021	1.27826e-12	-2.75722	2.24396e-43	-1.66945	1.31364e-23	-1.08777	2.0429e-05
Unigene65327_All	0.52	0.72	0.35	0.75	0.34	0.75	0.71	0.72	1.04	0.36	0.68	0.37	-0.167369	0.125488	0.219664	0.101157	0.646513	0.00170794	-0.387033	0.0213128	0.426849	0.0163181	-0.813882	0.000177031
CL1605.Contig3_All	2.25	4.4	1.82	3.33	3.83	2.97	0.74	1.67	1.46	0.46	1.43	0.81	-1.65411	5.55733e-89	0.259742	5.94905e-06	-1.11781	2.75379e-49	-1.91385	1.00344e-129	-1.37756	1.61338e-80	-0.536295	4.64972e-08
Unigene46956_All	0.62	0.28	0.42	0.45	0.17	0.28	0.1	0.34	0.35	0.38	0.78	0.3	0.164639	0.144245	-0.54523	0.0407422	-0.712239	0.0197885	0.709868	0.00818406	-0.167009	0.175537	0.876878	0.00520427
CL9891.Contig5_All	2.12	0.68	2.36	1.08	0.86	0.96	0.48	0.66	0.92	1.01	1.13	0.81	-0.806037	6.74237e-15	-0.830328	2.02255e-15	-1.31326	1.86859e-30	0.024291	0.130137	-0.482936	0.000113024	0.507227	4.49416e-05
CL12932.Contig2_All	1.01	0.32	1.29	0.29	0.38	0.27	0.07	0.19	0.22	0.2	0.85	0.81	-0.491844	0.000204548	-1.48188	2.25542e-18	-2.43723	7.97223e-34	0.990037	2.2188e-08	-0.95535	0.000103212	1.94539	3.63537e-19
CL17028.Contig21_All	0.5	0.38	0.26	0.38	0.3	0.64	0.79	0.71	0.43	0.47	0.59	0.27	0.237415	0.0480488	0.229168	0.0584801	0.768797	1.27148e-06	0.00824672	0.147358	0.539629	0.000245088	-0.531382	0.000251933
CL9009.Contig13_All	5.41	4.97	3.83	4.13	4.3	4.06	5.87	3.98	6.63	5.91	17.03	25.39	1.78136	2.18777e-188	-0.181059	0.0115148	0.225363	0.00191943	1.96241	1.11024e-214	0.406422	4.52566e-07	1.55599	4.50238e-155
CL1745.Contig26_All	2.47	0.72	2.49	1.8	1.27	2.03	0.25	0.87	1.16	0.89	1.34	1.76	-0.501843	1.11374e-07	-0.153463	0.0293084	-1.29769	6.19423e-31	-0.348381	0.00010837	-1.14422	3.02455e-23	0.795842	3.95383e-11
CL13948.Contig1_All	0.48	0.52	0.38	0.46	0.46	0.61	0.23	0.47	0.61	0.25	0.4	0.48	-0.276733	0.0697386	0.154261	0.135999	-0.049274	0.223441	-0.430994	0.0141905	-0.203535	0.107297	-0.227459	0.0968433
CL2704.Contig11_All	0.8	0.46	0.34	0.53	0.75	0.72	0.6	0.54	0.76	0.25	0.4	0.28	-0.781544	5.8972e-05	0.322148	0.0191626	0.262089	0.0421563	-1.10369	4.64968e-09	-0.0600584	0.181495	-1.04363	6.57301e-08
CL16583.Contig9_All	0.68	0.19	0.43	0.27	0.43	0.51	0.17	0.36	0.21	0.12	0.29	0.12	-1.31217	6.05951e-15	-0.105515	0.120051	-0.801606	1.4918e-07	-1.20665	8.93497e-13	-0.696091	5.71776e-06	-0.510562	0.00297777
CL3194.Contig24_All	104.01	169.85	172	149.55	71.79	59.5	183.81	129.93	150.63	252.66	330.82	219.2	0.857081	0	-0.660685	0	0.0700789	4.06944e-07	1.51777	0	0.730764	0	0.787003	0
CL13665.Contig6_All	0.52	1.33	1.05	1.78	2.38	1.09	1.65	2.25	1.32	0.67	2.1	2.07	0.740998	1.16907e-25	0.855278	1.56639e-34	0.853015	3.15627e-34	-0.11428	0.0111668	-0.00226308	0.236592	-0.112017	0.0199696
Unigene39042_All	4.37	2.93	3.26	1.08	0.71	0.76	0.79	0.88	0.79	1.46	3.36	3.82	-0.281624	6.46039e-05	-2.04672	3.53662e-89	-2.09169	2.30394e-91	1.7651	1.88077e-61	-0.0449706	0.191334	1.81007	5.66659e-63
Unigene29574_All	2.41	0.87	1.26	2.37	1.69	2.05	1.27	1.23	0.98	0.86	1.01	0.71	-0.805097	9.75626e-19	0.434721	2.52472e-09	-0.371998	6.4432e-06	-1.23982	1.60653e-48	-0.806718	2.22549e-24	-0.433099	4.17063e-06
CL7237.Contig3_All	0.91	0.97	0.25	0.77	1.14	0.74	0.64	0.43	0.29	0.43	0.33	0.67	-0.566206	0.000341736	0.318729	0.0103449	-0.636724	0.000118711	-0.884935	1.40788e-08	-0.955453	4.38004e-09	0.0705176	0.172774
Unigene48808_All	1.03	1.32	0.97	1.7	2.18	3.74	2.75	1.97	1.46	0.74	1.49	2.31	0.45855	5.80108e-09	1.19893	8.09369e-64	0.900423	2.87726e-33	-0.740381	4.47874e-30	-0.298508	4.88503e-07	-0.441873	8.37732e-11
Unigene39521_All	0.3	0.27	0.3	0.24	0.58	0.43	0.12	0.39	0.52	0.12	0.3	0.12	-0.701755	0.0275674	0.501829	0.044819	0.241608	0.14494	-1.20358	0.000451902	-0.260221	0.11835	-0.943363	0.00687346
CL936.Contig28_All	4.92	1.81	2.52	6.26	3.93	4.11	3.89	4.47	4.66	1.37	2.32	2.88	-0.482073	7.6709e-07	0.633121	2.29959e-14	0.506054	1.90128e-09	-1.11519	3.08292e-35	-0.127067	0.0301208	-0.988127	1.30644e-26
CL3434.Contig9_All	14.87	13.98	16.77	26.12	21	27	18.93	19.25	21.12	7.15	8.93	19.88	-0.335712	1.38687e-28	0.702345	4.14412e-168	0.384347	2.90898e-46	-1.03806	0	-0.317999	1.52563e-40	-0.720059	2.07266e-141
CL14924.Contig5_All	4.59	6.3	4.92	10.02	8.3	6.84	5.4	8.57	5.86	3.27	6.76	2.77	-0.289897	0.00144813	0.677668	3.05934e-15	0.351438	5.66045e-05	-0.967564	5.02503e-27	-0.32623	2.82382e-05	-0.641335	1.36621e-11
CL2751.Contig1_All	16.29	10.05	13.16	12.7	14.73	15.14	6.38	10.8	12.83	5.62	9.47	8.88	-0.713383	2.89138e-58	0.110211	0.00159343	-0.386158	3.58921e-20	-0.823594	3.24867e-80	-0.496369	3.13947e-33	-0.327225	3.20456e-12
Unigene14561_All	0.2	0.1	0.1	0.16	0.15	0.22	0.46	0.14	0.24	0.14	0.31	0.13	0.534916	0.00323841	0.40494	0.0186573	1.04098	3.27051e-08	0.129976	0.0815157	0.63604	0.000162345	-0.506064	0.00129796
CL8491.Contig15_All	3.91	4.16	3.81	4.52	4.47	4.07	4.02	4.22	4.38	2.58	4.93	4.58	0.0326448	0.149105	0.139292	0.0123848	0.0959661	0.0495687	-0.106648	0.0190699	-0.0433262	0.136303	-0.0633213	0.0902719
CL1307.Contig17_All	0.91	0.58	0.6	1.14	1.08	0.88	0.96	0.72	1.16	0.28	0.66	0.56	-0.469674	0.0143187	0.571683	0.00167175	0.451456	0.010014	-1.04136	4.2641e-07	-0.120226	0.138028	-0.92113	1.43734e-05
CL5718.Contig2_All	5.16	4.23	4.53	2.36	3.51	3.97	1.55	2.75	1.64	2.22	4.07	2.92	-0.58627	2.3528e-11	-0.498058	8.12235e-09	-1.21004	6.31722e-34	-0.0882121	0.0600211	-0.711984	3.63222e-11	0.623772	7.17458e-09
CL7177.Contig9_All	1.35	1.24	0.92	2.71	0.99	2.94	2.31	2.61	2.46	1.27	1.8	1.79	0.467101	3.97124e-06	0.918428	5.72024e-21	1.07525	2.03872e-29	-0.451327	1.41882e-07	0.156818	0.017503	-0.608145	2.57952e-12
CL15113.Contig1_All	3.43	1.69	4.3	8.02	6.87	6.71	11.57	8.04	12.57	0.88	2.59	1.69	-0.852081	3.25931e-11	1.20406	1.83385e-39	1.78822	3.87289e-103	-2.05614	2.51874e-84	0.584161	3.22617e-18	-2.6403	4.14013e-167
CL14906.Contig1_All	1.94	1.86	1.71	3.54	3.59	2.4	3.99	2.93	2.97	1.05	4.09	4.8	0.862197	1.45963e-19	0.794327	2.20692e-16	0.853255	6.7414e-19	0.0678698	0.0681598	0.0589285	0.129526	0.00894134	0.215039
Unigene49086_All	2.85	2.26	2.05	1.46	5.93	4.99	2.76	3.19	3.35	1.48	1.44	2.28	-0.454571	4.72467e-09	0.788845	9.29898e-35	0.382891	1.56236e-08	-1.24342	1.85475e-72	-0.405954	9.65318e-12	-0.837462	1.80919e-29
CL1972.Contig4_All	1.48	0.69	0.68	0.87	1.06	1.41	0.76	0.81	1.13	0.32	0.94	0.61	-0.600127	3.0527e-06	0.233918	0.0144065	-0.0675501	0.162617	-0.834046	2.66571e-11	-0.301469	0.00381568	-0.532577	3.54329e-05
Unigene53881_All	1.82	3.95	2.56	6.89	4.9	3.33	7.28	5.08	5.37	2.74	3.87	3.59	0.304476	0.00158638	0.865468	1.11441e-18	1.10362	1.85694e-31	-0.560992	4.78047e-10	0.238155	0.00132877	-0.799147	3.07142e-19
CL11129.Contig2_All	2.2	2.76	2	5.62	4.44	2.48	5.28	3.14	6.93	1.74	4.34	4.91	0.668591	2.04567e-15	0.854437	3.3485e-25	1.14791	2.41567e-48	-0.185847	0.00219637	0.29347	7.03339e-06	-0.479316	3.63344e-12
CL350.Contig8_All	2.69	2.21	3.37	4.19	4.15	3.69	2.42	3.34	3.69	1.33	1.89	1.93	-0.67487	8.91379e-11	0.543375	1.48533e-10	0.203448	0.00923614	-1.21824	4.75059e-37	-0.339927	1.97465e-05	-0.878317	6.22733e-18
CL2754.Contig12_All	7.07	4.73	3.08	12.47	6.89	6.55	4.43	7.75	10.32	3.99	7.31	4.22	0.0669176	0.0728068	0.805263	5.60382e-48	0.607363	2.82467e-26	-0.738345	3.89031e-42	-0.197899	3.27835e-05	-0.540446	8.61025e-22
CL7228.Contig6_All	4.83	3.74	3.51	3.46	3.94	6.16	1.82	3	3.38	1.69	2.64	2.38	-0.84257	2.36235e-36	0.167132	0.00115982	-0.55018	6.12038e-18	-1.0097	1.41733e-54	-0.717312	9.08374e-31	-0.29239	3.02731e-05
Unigene87434_All	4.03	4.59	3.35	10.59	10.64	4.71	9.02	7.13	9.05	5.43	7.23	10.17	0.947283	4.95112e-30	1.1224	1.66283e-43	1.08901	1.72685e-40	-0.175117	0.00211081	-0.0333941	0.160857	-0.141723	0.0122747
CL5920.Contig5_All	1.39	0.69	1.52	1.67	1.3	0.98	0.78	0.63	0.78	1.64	1.23	0.52	-0.0862812	0.0985228	0.138233	0.0476852	-0.708248	3.32257e-10	-0.224514	0.00458167	-0.84648	2.26307e-14	0.621966	3.5667e-08
CL11131.Contig6_All	3.98	3.91	3.13	4.05	5.18	5.05	2.64	3.31	4.1	1.8	2.52	2.89	-0.60519	8.65719e-15	0.374452	1.0409e-08	-0.124755	0.0286955	-0.979642	1.45971e-40	-0.499208	1.76741e-13	-0.480434	1.30597e-09
Unigene6051_All	57	38.7	51.09	49.14	78.87	51.4	58.55	75.98	76.98	48.79	87.9	85.82	0.606758	6.31943e-282	0.291315	2.60847e-59	0.536309	2.06182e-213	0.315443	7.66864e-86	0.244994	1.59353e-50	0.0704486	2.23374e-06
CL10393.Contig3_All	1.7	1.32	1.66	2.59	3.1	3.22	1.74	2.13	2.32	0.46	1.15	0.8	-0.955901	4.74106e-25	0.928515	1.69399e-43	0.408268	1.60431e-08	-1.88442	4.10612e-126	-0.520247	7.82517e-17	-1.36417	7.04844e-56
CL15005.Contig1_All	8.57	10.29	9.05	21.44	12.67	14.72	10.36	14.74	17.06	1.61	1.21	1.52	-2.67667	1.21339e-241	0.811276	4.02138e-75	0.606808	6.49767e-40	-3.48795	0	-0.204468	1.55566e-07	-3.28348	0
CL7204.Contig7_All	0.92	1.22	1.03	1.34	1.28	1.86	0.41	1.38	1.56	0.46	0.79	0.75	-0.662846	7.31993e-07	0.500035	5.04972e-06	0.0891847	0.134039	-1.16288	2.07216e-20	-0.410851	0.000107217	-0.75203	1.86677e-08
CL4164.Contig4_All	6.25	5.62	6.78	8.79	8.95	8.75	6.99	9.89	9.21	2.48	4.2	3.67	-0.843396	5.339e-46	0.508573	2.63761e-27	0.493731	1.23218e-25	-1.35197	2.82803e-137	-0.0148418	0.185218	-1.33713	7.93199e-133
CL15290.Contig2_All	3.73	2.6	2.88	2.5	3.66	4.16	0.99	2.53	2.35	0.81	1.36	1.65	-1.26021	1.96382e-37	0.16631	0.0104551	-0.637781	5.11793e-13	-1.42652	2.17991e-50	-0.804091	1.24154e-20	-0.622429	8.60181e-09
Unigene38768_All	1.93	3.94	3.23	5.45	4.91	3.19	3.14	5.16	3.66	2.82	2.98	3.18	-0.00215708	0.22097	0.581415	3.56126e-07	0.418447	0.000230421	-0.583572	1.56054e-07	-0.162968	0.0410962	-0.420604	0.000183112
CL7892.Contig2_All	1.07	1.25	1.14	2.42	3.24	1.9	3.74	1.95	2.44	1.17	2.48	2.74	0.893717	2.7262e-11	1.13032	4.96033e-18	1.24161	4.5896e-22	-0.236606	0.00644015	0.111287	0.0829785	-0.347893	0.000566385
CL3699.Contig25_All	0.6	0.66	0.26	0.45	0.31	0.22	0.2	0.35	0.2	0.3	0.54	0.52	-0.154429	0.0787368	-0.62812	6.87807e-05	-1.00758	8.62535e-09	0.47369	0.00110667	-0.379459	0.0180135	0.85315	1.28273e-06
CL7358.Contig1_All	16.06	16.14	14.74	14.66	16.05	13.08	9.41	16.86	17.24	7.5	8.8	10.43	-0.804213	4.14868e-81	-0.0972721	0.0033485	-0.0977725	0.00345384	-0.706941	2.33076e-61	-0.000500349	0.239876	-0.70644	1.06165e-60
CL8485.Contig6_All	8.83	6.95	6.06	5.88	11.91	10.7	5.74	5.78	8.71	2.69	3.9	4.8	-0.926182	1.01057e-28	0.386306	3.85673e-09	-0.0964311	0.0577814	-1.31249	1.09136e-63	-0.482737	8.23549e-13	-0.829751	1.33281e-22
CL10588.Contig2_All	1.3	1.11	1.17	1.43	1.7	1.14	1.05	1.55	1.09	0.44	0.55	0.66	-1.11215	8.14482e-21	0.252324	0.0027663	0.0498718	0.169796	-1.36448	3.23899e-33	-0.202452	0.0104383	-1.16203	8.89033e-23
CL15100.Contig6_All	8.89	6.71	9.47	9.46	10.25	7.56	4.5	9.13	9.15	4.11	10.94	6.4	-0.221862	1.42381e-08	0.123846	0.000426937	-0.128661	0.000487419	-0.345708	4.27743e-19	-0.252507	4.75065e-11	-0.0932005	0.00729677
CL1699.Contig10_All	2.51	2.48	2.06	1.63	1.3	2.08	1.44	2.02	0.9	0.86	1.94	1.34	-0.760829	9.76346e-14	-0.488854	3.77499e-07	-0.679046	2.01546e-11	-0.271975	0.00301154	-0.190191	0.0274406	-0.0817834	0.122501
CL1314.Contig31_All	1.09	0.66	0.63	1	0.54	0.74	0.47	0.94	0.91	0.35	0.51	0.81	-0.502206	0.00133057	-0.0569323	0.18379	-0.0273673	0.229461	-0.445274	0.00228259	0.0295651	0.212055	-0.474839	0.00234209
CL6854.Contig2_All	0.15	0.26	0.12	0.19	0.21	0.19	0.75	0.82	0.92	0.48	0.71	0.59	1.75252	1.01363e-14	0.142177	0.164979	2.23478	3.33753e-26	1.61034	1.62762e-13	2.0926	3.10796e-24	-0.48226	0.000688617
CL5347.Contig16_All	1.21	1.05	0.85	0.53	0.55	0.53	0.3	0.8	0.66	0.31	0.65	0.65	-0.949037	2.09923e-11	-0.948441	2.87904e-11	-0.809617	5.34001e-09	-0.000596481	0.15147	0.138824	0.110414	-0.139421	0.103337
CL3986.Contig3_All	1.21	1.47	1	2.01	2.1	1.69	1.42	1.59	1.91	0.61	1.4	1.15	-0.216476	0.00232508	0.653438	4.94834e-21	0.419329	4.43284e-09	-0.869914	6.41334e-34	-0.234109	0.000131422	-0.635805	1.86354e-17
CL6429.Contig1_All	0.5	0.74	0.79	1.54	0.88	1.06	0.74	0.76	0.8	0.21	0.17	0.14	-1.94953	9.46159e-09	0.784439	0.000126559	0.199088	0.119033	-2.73397	7.33436e-20	-0.58535	0.00200707	-2.14862	9.25596e-11
CL3683.Contig2_All	16.43	10.53	14.53	13.23	11.17	16	5.62	10.33	9.35	5.56	8.45	5.28	-1.09937	9.24277e-131	-0.0356823	0.095326	-0.701889	1.47452e-61	-1.06369	2.65351e-121	-0.666207	7.44476e-55	-0.39748	4.78855e-15
CL14608.Contig2_All	5	1.82	3.56	1.08	1.31	1.7	1.14	1.25	1.25	1.77	3.58	3.86	-0.166978	0.00256202	-1.33979	6.87789e-67	-1.50285	5.93383e-79	1.17282	1.5958e-49	-0.163059	0.0324845	1.33588	1.16974e-59
CL6586.Contig5_All	0.74	0.78	0.52	1.31	1.25	1.17	0.42	1.13	1	0.16	0.32	0.28	-1.39937	1.54851e-14	0.879504	9.30185e-13	0.337081	0.00508714	-2.27887	1.52184e-47	-0.542424	1.90665e-06	-1.73645	1.27504e-23
CL16231.Contig11_All	0.74	0.68	0.6	1.31	1.62	1.66	0.72	1.87	1.48	0.18	0.34	0.16	-1.57866	9.95124e-21	1.18632	2.36068e-29	1.02253	4.33289e-21	-2.76499	3.80546e-89	-0.163789	0.0205495	-2.6012	2.72361e-74
CL10089.Contig6_All	0.71	0.74	0.71	1.19	1.07	1.32	1.1	1.31	1.04	0.69	0.8	1.02	0.219664	0.020221	0.731775	4.26334e-11	0.682908	1.01667e-09	-0.512111	5.04839e-07	-0.0488676	0.162038	-0.463244	8.76595e-06
Unigene18597_All	4.33	2.63	3.48	6.5	3.54	3.94	2.22	4.19	5.8	2.01	4.1	3.11	-0.175749	9.24909e-05	0.425274	9.47969e-23	0.233822	1.05748e-07	-0.601023	1.063e-41	-0.191453	2.24118e-06	-0.40957	5.42496e-19
CL5061.Contig1_All	5.68	4.23	6.52	5.11	5.51	6.85	2.77	4.29	4.39	2.06	3.78	3.04	-0.884617	1.26484e-52	0.0901197	0.0210331	-0.513179	4.45874e-21	-0.974737	1.0526e-65	-0.603299	3.31558e-29	-0.371438	2.47688e-09
CL7511.Contig8_All	68.04	37.11	92.9	57.38	19.36	32.82	62.36	49.08	56.7	68.25	129.27	123.98	0.71092	3.77787e-296	-0.847826	2.951e-244	-0.223544	1.10993e-22	1.55875	0	0.624282	9.35962e-123	0.934464	0
CL17084.Contig5_All	11.12	5.79	9.08	3.69	4.43	4.05	2.64	3.98	3.06	2.78	5.41	3.79	-1.11254	2.90284e-117	-1.09249	3.32119e-113	-1.41613	1.23792e-168	-0.0200412	0.114583	-0.32364	9.0063e-08	0.303599	4.24367e-07
Unigene1750_All	0.83	1.5	0.54	1.96	2	2.08	1.28	0.94	1.16	0.44	0.62	0.34	-1.01387	5.42506e-05	1.07913	3.81984e-09	0.256365	0.0719124	-2.093	1.19913e-21	-0.822761	2.00176e-06	-1.27024	3.14225e-07
CL5225.Contig1_All	1.58	1.64	1.73	1.96	1.81	1.87	1.38	1.58	2.4	0.86	2.49	1.61	0.0113564	0.208733	0.191267	0.0294278	0.121195	0.0897091	-0.179911	0.0201964	-0.0700724	0.141484	-0.109838	0.0897184
CL12170.Contig3_All	2.01	2.36	2.1	2.58	3.53	3.5	2.08	4.2	2.13	0.54	1.16	1.26	-1.12105	1.02584e-21	0.573728	4.09473e-11	0.39337	7.26265e-06	-1.69478	2.42925e-57	-0.180358	0.00959465	-1.51442	4.50477e-43
Unigene45752_All	2.47	2.65	1.9	4.87	4.41	2.95	4.11	4.55	4.14	1.15	2.09	2.6	-0.259847	7.82996e-05	0.802876	8.68101e-43	0.873047	2.74062e-51	-1.06272	3.84972e-68	0.0701706	0.0488721	-1.13289	2.37083e-78
CL1431.Contig47_All	3.22	1.88	3.21	1.35	1.33	1.21	1.52	2.53	3.01	1.42	2.4	3.95	-0.0870147	0.0786957	-1.08943	2.52755e-26	-0.223327	0.00437845	1.00241	2.02863e-22	0.866099	4.36927e-16	0.136313	0.0363733
Unigene35385_All	0.21	0.38	0.11	0.56	0.36	0.7	0.81	1.32	0.55	0.42	0.47	0.77	1.24753	3.16523e-07	1.21269	8.98633e-07	1.94146	3.90932e-18	0.0348361	0.133565	0.728767	2.81252e-05	-0.69393	4.72559e-05
Unigene13403_All	8.71	5.76	4.99	4.88	8.1	8.81	6.02	6.54	7.17	1.65	5.1	4.84	-0.743063	3.0778e-60	0.164096	1.12079e-05	0.02671	0.143668	-0.907159	3.38514e-94	-0.137386	0.000169084	-0.769773	8.76514e-65
CL6054.Contig16_All	3.57	8.64	3.35	11.33	12.94	8.33	16.71	15.52	8.96	4.38	7.74	9.88	0.518371	1.27093e-09	1.07359	1.06406e-41	1.42546	5.6638e-81	-0.555217	5.18143e-15	0.351873	8.24942e-09	-0.90709	2.03161e-40
Unigene14990_All	14.16	14.46	13.09	15.43	17.53	15.19	10.86	11.82	14.43	8.37	18	18.32	0.106973	0.000928236	0.209569	1.54142e-09	-0.160213	9.94881e-06	-0.102596	0.000609073	-0.369782	2.151e-24	0.267186	2.45158e-13
CL9438.Contig1_All	0.62	1.03	0.83	1.84	1.72	1.29	1.84	3.03	2.15	0.83	2.52	2.08	1.15356	1.01801e-09	0.977702	4.54655e-07	1.52864	2.57394e-17	0.175859	0.0469523	0.550943	0.000136883	-0.375083	0.00370748
CL11492.Contig1_All	18.29	20.53	11.67	36.79	23.92	24.13	14.14	16.21	5.49	2.6	4.28	6.69	-1.88342	1.66432e-258	0.753589	1.22236e-103	-0.479651	1.19016e-28	-2.63701	0	-1.23324	9.51188e-232	-1.40377	4.96711e-122
CL17028.Contig9_All	3.08	2.58	2.69	1.78	3.54	3.63	0.73	1.62	1.35	1.01	1.97	0.91	-1.09859	1.57031e-40	0.099961	0.0412744	-1.16317	8.98847e-44	-1.19855	9.16369e-50	-1.26313	6.53226e-53	0.0645799	0.131768
CL10881.Contig2_All	11.06	15.27	11.7	25.46	19.21	13.99	17.48	22.2	21.92	6.27	10.02	18.04	-0.135108	0.00143702	0.62987	1.49741e-51	0.708502	2.83593e-66	-0.764978	1.40289e-72	0.0786321	0.0111134	-0.84361	1.73461e-89
CL16594.Contig3_All	0.17	0.29	0.08	0.84	0.72	0.85	0.61	0.21	0.39	0.14	0.18	0.2	-0.090792	0.182018	2.15545	2.8821e-20	1.16001	1.51701e-05	-2.24624	1.09935e-21	-0.995438	1.16462e-07	-1.2508	4.1117e-06
CL3739.Contig5_All	1.93	0.94	1.24	1.29	0.93	1.56	0.85	0.78	0.61	0.58	0.98	1.04	-0.653962	6.33997e-12	-0.119555	0.0516515	-0.870446	3.90368e-18	-0.534407	1.54807e-08	-0.750891	1.89061e-13	0.216484	0.0160944
CL1408.Contig5_All	3.81	5.83	2.33	4.69	6.57	4.35	0.82	2.19	1.6	0.99	1.81	1.25	-1.55671	6.39074e-73	0.384971	2.62873e-10	-1.36443	1.28578e-59	-1.94168	1.99472e-128	-1.7494	3.47785e-110	-0.192277	0.0230118
Unigene11697_All	0.83	0.85	0.58	0.84	1.59	1.7	0.31	0.59	0.89	0.25	0.53	0.34	-1.02073	1.28491e-12	0.870975	9.1425e-17	-0.324436	0.00461676	-1.89171	7.27803e-52	-1.19541	8.30272e-27	-0.696296	2.79138e-06
Unigene65468_All	12.44	11.63	12.2	9.82	20.2	16.97	7.65	11.5	11.02	4.91	11.77	9.57	-0.456271	1.91941e-18	0.376781	8.58486e-17	-0.251306	3.92926e-07	-0.833052	6.80128e-65	-0.628087	1.12655e-39	-0.204965	7.24925e-05
CL10484.Contig5_All	14.93	9.93	10.54	21.86	14.24	17.08	6.6	9.78	11.09	4.65	6.66	7.09	-0.93682	3.14516e-96	0.590635	4.14549e-65	-0.356625	2.09575e-18	-1.52745	0	-0.94726	5.30843e-145	-0.580195	1.01016e-33
CL1256.Contig5_All	0.23	0.26	0.21	0.22	0.4	0.29	0.04	0.1	0.15	0.07	0.11	0.13	-1.18915	0.000125	0.369578	0.0438938	-1.30008	6.04311e-05	-1.55872	1.47137e-07	-1.66966	9.13487e-08	0.110935	0.188809
Unigene58446_All	0.42	0.36	0.17	0.45	0.75	0.89	0.18	0.6	0.52	0.17	0.31	0.14	-0.599779	0.00594448	1.14248	1.18785e-09	0.469814	0.0101695	-1.74226	5.0248e-17	-0.67267	5.93576e-05	-1.06959	2.90145e-06
Unigene49663_All	2.13	1.94	1.87	1.88	2.29	1.58	1.43	2.18	2.08	0.8	1.97	2.08	-0.288576	0.000229424	-0.0435842	0.154136	-0.0561116	0.140722	-0.244992	0.00083252	-0.0125274	0.216936	-0.232464	0.00223352
CL1861.Contig1_All	1.17	1.08	1.03	1.09	1.79	1.67	1.3	1.27	1.23	0.55	0.93	0.89	-0.463651	0.000161177	0.468879	1.44376e-05	0.216175	0.0225492	-0.93253	6.23125e-15	-0.252704	0.00701227	-0.679826	4.6795e-08
CL4571.Contig7_All	8.15	7.38	9.46	22.27	11.56	17.71	23.79	15.37	16.91	5.23	15.55	14.06	0.488133	8.20372e-25	1.04821	3.21248e-129	1.17336	4.89556e-168	-0.560077	1.6567e-45	0.125151	0.000174584	-0.685228	2.71753e-69
Unigene57227_All	3.8	2.7	3.11	4.84	2.74	3.48	0.99	2.31	1.88	1.13	2.12	1.18	-1.11268	8.64034e-55	0.205492	0.000129952	-0.882134	1.63951e-37	-1.31817	7.24298e-82	-1.08763	6.27323e-60	-0.230545	0.00192809
CL17227.Contig28_All	1.87	1.34	0.89	0.5	0.42	0.98	0.2	0.54	0.45	0.34	0.62	0.55	-1.43441	1.4015e-33	-1.10712	7.56581e-23	-1.7661	3.22869e-44	-0.327291	0.0043891	-0.65898	8.23352e-06	0.331689	0.0122654
CL10491.Contig1_All	122.54	100.29	118.04	64.07	60.99	75.02	50.46	77.78	52.55	68.52	141.71	157.12	0.117245	1.93325e-17	-0.765549	0	-0.901558	0	0.882794	0	-0.136009	5.84508e-13	1.0188	0
CL12550.Contig2_All	1.41	1.03	0.78	1	1.6	1.3	0.32	0.63	0.63	0.35	0.43	0.88	-0.947218	3.88922e-12	0.281636	0.00424183	-1.01825	3.00531e-13	-1.22885	3.80627e-21	-1.29989	2.63467e-22	0.0710313	0.162948
CL6072.Contig26_All	0.34	0.17	0.18	0.24	0.13	0.3	0.07	0.13	0.21	0.03	0.06	0.09	-1.94637	1.47595e-14	-0.0492452	0.197535	-0.753512	0.000135305	-1.89713	5.75891e-14	-0.704267	0.000339718	-1.19286	1.77888e-05
CL343.Contig2_All	2.14	4.03	1.86	1.74	1.87	2.52	1.84	1.79	1.89	1.3	2.86	3.47	-0.0684945	0.0781532	-0.388291	2.89416e-08	-0.533788	2.33925e-13	0.319797	2.22011e-06	-0.145497	0.0203815	0.465294	1.77896e-10
Unigene65686_All	18.13	29.31	34.69	19.37	19.08	17.45	28.67	28.48	18.16	32.26	22.05	37.88	0.181471	3.52232e-07	-0.549357	2.96278e-39	-0.10657	0.00236872	0.730828	4.07085e-73	0.442787	3.82303e-25	0.288041	1.09013e-14
CL5127.Contig3_All	25.71	49.88	27.74	46.65	47.91	44.73	47.76	59.45	57.43	16.64	19.05	40.13	-0.434521	1.06295e-48	0.434209	1.38976e-64	0.684365	2.09461e-171	-0.868729	1.41387e-219	0.250156	4.19113e-28	-1.11889	0
Unigene15056_All	0.72	2.08	1.29	4.46	3.49	1.64	7.57	2.36	3.76	2.33	4.15	5.6	1.56684	5.43578e-106	1.23091	1.14918e-58	1.73894	9.88642e-137	0.335932	1.80835e-09	0.508035	1.92853e-19	-0.172102	0.000435737
CL7798.Contig10_All	1.35	1.87	1.62	2.05	1.8	2.22	1.08	2.34	2.73	0.97	0.82	1.29	-0.645891	2.23043e-08	0.326995	0.000444507	0.353572	0.000178238	-0.972886	1.20043e-18	0.0265773	0.195407	-0.999463	2.35509e-19
CL5167.Contig6_All	0.81	0.3	0.39	0.44	0.47	0.61	0.16	0.23	0.44	0.24	0.99	0.79	0.434821	0.00466622	0.020774	0.224458	-0.857541	6.36593e-05	0.414047	0.00390219	-0.878315	4.09977e-05	1.29236	2.94644e-10
CL9442.Contig1_All	0.65	1.22	0.76	0.77	1.54	1.29	0.96	1.81	2.11	1.11	1.41	1.14	0.49037	0.00359973	0.460336	0.00648003	0.910307	2.79003e-07	0.0300341	0.133927	0.449972	0.00268318	-0.419938	0.00378143
Unigene65449_All	0.61	1.46	0.83	1.4	1.44	0.83	4.32	3.15	1.62	4.32	1.92	1.8	1.4776	2.91661e-35	0.345463	0.00614096	1.65895	3.59579e-46	1.13214	2.96634e-24	1.31348	4.25534e-33	-0.181343	0.01307
CL675.Contig7_All	3.59	7.63	5.81	14.57	6.47	6.14	11.02	11.27	8.71	4.03	7.45	9.74	0.32396	1.81852e-11	0.678817	5.91794e-49	0.871584	1.25773e-84	-0.354857	1.12401e-16	0.192767	6.3003e-07	-0.547624	1.26254e-38
CL4170.Contig5_All	4.46	3.32	4.18	6.18	9.1	9.22	2.41	4.81	5.6	1.79	2.49	2.27	-0.863726	1.35284e-36	1.03602	1.25689e-97	0.109864	0.0198555	-1.89975	2.1947e-242	-0.926159	6.37534e-81	-0.97359	1.93686e-47
Unigene22792_All	0.55	1.45	0.94	2.79	2.15	0.74	3.68	1.57	2.36	1.46	2.37	1.38	0.827592	6.2016e-09	0.950831	1.78659e-11	1.37816	3.2287e-25	-0.123239	0.0529662	0.427327	6.69872e-05	-0.550565	7.45653e-07
CL5608.Contig1_All	1.05	1.72	0.72	1.17	1.49	1.6	1.02	1.37	1.41	0.6	0.84	1.24	-0.377837	0.000543036	0.291159	0.00236173	0.132327	0.0706868	-0.668995	1.14624e-09	-0.158832	0.0391851	-0.510163	5.67524e-06
Unigene64126_All	3.05	3.33	2.72	3.56	9.69	5.28	7.61	3.45	4.39	3.07	4.76	2.51	0.18659	0.000774947	1.02505	6.11796e-83	0.76489	5.69072e-43	-0.83846	2.02097e-60	-0.260161	1.33098e-08	-0.5783	4.22878e-27
CL4523.Contig3_All	1.73	1.08	0.8	0.78	1.71	0.97	0.67	1.15	1.14	0.39	0.98	0.42	-1.00434	2.22004e-23	-0.0621765	0.126377	-0.276465	0.000831391	-0.94216	1.16023e-20	-0.214288	0.00629364	-0.727872	4.39269e-12
Unigene50522_All	0.87	0.52	0.78	0.3	0.45	0.93	0.13	0.43	0.37	0.15	0.3	0.13	-1.90678	1.08812e-14	-0.361898	0.0185853	-1.20289	3.08779e-08	-1.54489	1.57628e-09	-0.840988	0.000154507	-0.703897	0.00693463
CL5121.Contig4_All	0.37	0.51	0.42	0.43	0.2	0.58	0.61	0.46	0.83	0.17	0.39	0.22	-0.742925	4.83184e-07	-0.0947433	0.130557	0.545021	4.36916e-06	-0.648181	7.01068e-06	0.639764	1.54945e-07	-1.28795	1.56272e-20
CL14617.Contig2_All	6.65	10.66	10.12	8.71	3.77	3.03	4.99	6.78	4.28	16.63	16.55	12.08	0.729159	1.95405e-57	-0.816767	2.2928e-42	-0.759696	1.72945e-37	1.54593	3.02532e-190	0.0570717	0.110543	1.48886	3.98405e-179
CL5377.Contig1_All	8.06	3.76	5.04	3.18	5.88	5.69	1.51	2.81	3.43	1.6	2.44	1.91	-1.49594	4.93214e-106	-0.190244	0.000207984	-1.10951	1.00406e-66	-1.30569	1.92676e-76	-0.91927	1.92269e-43	-0.386422	1.4463e-06
CL279.Contig3_All	9.53	17.38	9.89	29.7	16.33	10.08	25.36	25.34	29.63	19.66	32.7	36.36	1.29081	8.84408e-121	0.61765	2.81167e-23	1.14944	8.92727e-91	0.67316	3.06929e-42	0.53179	2.26386e-25	0.14137	0.000653352
CL12100.Contig3_All	2.37	3.07	2.09	2.86	4.6	5.05	2.39	5.22	2.77	1.63	1.02	1.64	-0.803122	1.69706e-14	0.734274	1.19932e-19	0.478248	1.05468e-08	-1.5374	1.38363e-61	-0.256027	0.000261968	-1.28137	1.7639e-39
CL11692.Contig3_All	1.02	1.51	1.32	5.63	2.92	3.11	3.71	4.95	4.3	0.59	1.67	1.49	-0.0247162	0.195345	1.60589	1.82167e-53	1.76571	1.32964e-67	-1.63061	2.75321e-55	0.159822	0.0125294	-1.79043	3.01338e-69
CL5162.Contig2_All	1.07	1.2	0.9	2.11	2.69	1.68	1.2	1.49	1.28	0.77	1.31	0.5	-0.282608	0.0426733	1.04235	5.08206e-11	0.349469	0.0183757	-1.32496	1.06856e-15	-0.692882	2.33501e-06	-0.632077	0.000323631
CL16615.Contig7_All	0.85	0.75	0.23	0.43	0.77	0.34	0.48	0.76	0.28	0.22	0.3	0.24	-1.26539	4.57379e-08	-0.24014	0.0661147	-0.258327	0.0616707	-1.02525	8.30798e-06	-0.0181867	0.228134	-1.00706	2.14825e-05
CL14147.Contig1_All	1.88	1.78	1.65	3.84	3.59	3.42	3.38	1.76	4.05	0.4	1.23	0.71	-1.17407	9.55738e-19	1.03432	9.89126e-30	0.79675	4.93917e-17	-2.20839	2.6603e-87	-0.237568	0.00112297	-1.97082	4.79449e-64
Unigene24776_All	11.31	5.78	12.89	2.6	3.43	4.48	0.73	2.05	2.3	4.04	5.93	4.6	-1.03651	3.34606e-118	-1.51245	1.01959e-210	-2.55015	0	0.475948	1.06467e-16	-1.0377	3.28762e-42	1.51365	6.32438e-104
CL4249.Contig2_All	0.55	0.63	0.4	0.45	0.65	0.54	1.16	0.89	0.59	0.5	0.83	0.73	0.394974	0.0524967	0.0584038	0.212496	0.767477	0.00318613	0.33657	0.0456233	0.709074	0.00491948	-0.372503	0.0468925
CL2756.Contig8_All	33.22	34.94	27.54	48.92	25.39	27.47	14.82	21.98	16.96	10.08	22.13	13.03	-1.0776	0	0.0927457	1.89578e-06	-0.823119	6.55124e-267	-1.17034	0	-0.915865	0	-0.25448	2.09729e-19
CL9113.Contig7_All	0.76	1.09	0.81	0.3	0.54	0.55	0.39	0.43	0.5	0.2	0.35	0.45	-1.39547	1.53219e-14	-0.947646	1.37433e-08	-1.00521	3.02382e-09	-0.447828	0.00708293	-0.0575626	0.194958	-0.390265	0.0217537
CL8611.Contig11_All	3.94	7.44	4.52	1.07	3.18	2.23	1.41	1.24	1.44	2.69	1.97	3.49	-0.956306	1.30741e-39	-1.29609	5.35619e-63	-1.94967	7.26067e-112	0.339782	4.25756e-05	-0.653587	1.04854e-09	0.993369	1.69684e-22
Unigene2840_All	0.33	0.19	0.29	0.27	0.62	0.41	0.55	0.76	0.25	0.17	0.55	0.51	0.607971	0.013534	0.690161	0.00778753	0.969009	0.000347226	-0.0821903	0.119087	0.278848	0.0789186	-0.361038	0.0457356
CL16702.Contig2_All	0.75	1.4	0.43	0.98	2.65	1.38	0.33	0.63	0.19	0	0	0	-8.17135	2.76054e-31	0.955743	2.74504e-11	-1.1435	2.5358e-08	-9.12709	3.408e-53	-2.09924	2.59107e-32	-7.02785	1.91161e-16
CL5198.Contig22_All	21.43	10.59	20.59	9.78	7.44	11.83	5.97	16.75	10.31	10.27	17.12	12.87	-0.379709	2.08113e-28	-0.853689	9.63287e-115	-0.65655	4.28059e-73	0.473981	6.90645e-33	0.197139	1.40391e-06	0.276842	4.67588e-13
CL12748.Contig102_All	0.62	0.5	0.55	0.43	0.55	0.32	0.38	0.58	0.39	0.41	1.04	0.78	0.424292	0.00753183	-0.348995	0.0333032	-0.2866	0.0576546	0.773287	2.87355e-05	0.0623954	0.196902	0.710891	0.000143161
CL16445.Contig19_All	2.06	1.18	0.71	1.02	0.84	1.29	0.57	1.52	1.12	0.58	0.88	0.48	-1.02397	2.09226e-11	-0.327892	0.00602913	-0.288059	0.0125366	-0.696073	5.34212e-06	0.0398334	0.196564	-0.735906	2.87588e-06
CL8681.Contig3_All	1.55	1.84	1.1	2.73	4.44	4.14	0.53	2.19	2.13	0.43	0.47	0.62	-1.55423	7.44e-40	1.33348	2.42859e-77	0.124306	0.0507521	-2.88771	4.56885e-210	-1.20918	2.66242e-66	-1.67853	7.23597e-48
CL5618.Contig2_All	7.65	8.01	6.46	7.36	12	9.71	3.96	8.19	5.51	2.23	5.49	3.55	-0.969578	1.24391e-84	0.394709	1.01501e-23	-0.314544	1.16118e-12	-1.36429	5.36053e-190	-0.709253	8.39548e-65	-0.655034	1.3427e-35
CL1988.Contig57_All	3.11	4.21	4	12.88	12.81	8.99	6.2	15.06	15.39	1.52	2.51	2.34	-0.825264	3.82358e-26	1.61647	3.01968e-217	1.70525	2.75416e-248	-2.44173	0	0.0887861	0.00711619	-2.53052	0
CL1945.Contig2_All	4.03	3.5	7.58	2.32	2.96	4.59	1.63	2.79	3.12	1.97	3.72	3.86	-0.657123	1.73393e-39	-0.614136	6.03554e-35	-0.99653	6.14621e-78	-0.0429879	0.0717503	-0.382395	7.08831e-11	0.339407	6.07805e-09
Unigene56613_All	0.51	0.88	0.36	0.44	0.86	0.42	1.43	1.23	0.87	0.76	0.64	0.75	0.310449	0.0815543	-0.0181844	0.233591	1.03662	9.10485e-05	0.328633	0.0499967	1.0548	7.26068e-05	-0.726171	0.00200351
CL5020.Contig1_All	14.03	10.05	11.55	11.78	11.98	15.25	7	10.71	11.64	5.1	8.63	7.87	-0.719431	1.83376e-277	0.13178	3.43644e-14	-0.274732	2.94769e-48	-0.851211	0	-0.406512	5.05596e-108	-0.444699	3.90189e-97
Unigene93085_All	0	0	0	0.24	0.12	0.12	0	0	0	0	0	0
CL4466.Contig6_All	2.52	1.36	2.5	3.74	1.98	1.92	4.72	4.13	3.66	1.84	4	4.7	0.730707	2.58226e-25	0.265651	0.000216757	0.977274	5.65286e-47	0.465056	1.50959e-12	0.711623	5.01575e-28	-0.246567	1.46779e-05
CL17121.Contig23_All	3.78	4.62	6.47	7.1	13.74	12.85	1.85	7.32	7.54	2.52	3.11	2.94	-0.77479	1.34977e-10	1.18829	6.46361e-42	0.194703	0.0208671	-1.96308	2.69085e-86	-0.993588	1.17885e-31	-0.969493	2.23703e-16
CL5686.Contig9_All	5.98	4.72	6.08	4.37	4.18	4.02	1.84	3.52	3.46	3.43	5.69	4.01	-0.351463	1.74716e-15	-0.414775	3.26785e-20	-0.920702	1.67415e-77	0.0633125	0.031897	-0.505927	1.36469e-21	0.56924	1.26457e-27
Unigene37311_All	1.19	0.74	1.34	1.47	0.62	1.87	0.26	0.99	1.08	0.29	0.88	0.65	-0.847489	1.9408e-13	0.276253	0.00153196	-0.486926	4.67942e-06	-1.12374	1.79868e-24	-0.763179	2.35549e-13	-0.360563	0.00156157
Unigene49895_All	0.31	0.23	0.18	0.48	0.19	0.32	0.18	0.32	0.49	0.16	0.1	0.17	-0.751209	0.0034325	0.458802	0.0179875	0.471049	0.0170696	-1.21001	2.26617e-06	0.0122468	0.233592	-1.22226	3.24098e-06
CL2121.Contig8_All	1.09	0.63	0.87	1.43	1.29	1.08	0.39	1.12	0.57	0.17	0.32	0.57	-1.28073	2.42052e-17	0.559679	2.31691e-07	-0.296523	0.00778216	-1.8404	7.90712e-41	-0.856202	1.79734e-13	-0.984202	4.62791e-10
CL8570.Contig4_All	1.01	0.64	0.82	1.55	1.41	2.15	0.41	0.68	1.15	0.3	0.68	0.57	-0.667787	2.27862e-08	1.04472	2.46343e-30	-0.138598	0.067205	-1.71251	2.80441e-63	-1.18332	1.75362e-36	-0.529188	1.06826e-05
Unigene33831_All	1.05	1.48	0.82	2.28	2.41	2.22	0.59	1.05	0.94	0.31	0.8	0.81	-0.806182	2.8158e-17	1.04453	1.84463e-50	-0.365079	2.06666e-05	-1.85071	2.6182e-118	-1.40961	1.88682e-79	-0.441103	7.07562e-06
CL10205.Contig5_All	1.19	1.4	0.32	3.98	2.31	2.55	1.17	1.51	2.74	1	1.67	1.23	0.433961	0.00977005	1.60759	5.04682e-22	0.915289	6.27313e-07	-1.17363	9.58391e-15	-0.692301	6.34384e-07	-0.481328	0.00197055
Unigene34899_All	1.98	1.16	1.61	1.03	2.85	2.44	1	2.56	0.97	0.78	1.82	1.72	-0.131507	0.0382037	0.412583	2.33907e-07	-0.0560858	0.150043	-0.54409	2.10657e-11	-0.468669	8.58449e-09	-0.0754211	0.104673
CL5830.Contig6_All	2.53	1.88	1.26	1.7	2.32	2.96	0.7	1.67	1.33	0.32	0.69	0.91	-1.56457	1.24534e-89	0.297454	7.70436e-08	-0.605709	5.22378e-20	-1.86203	6.36228e-140	-0.903163	1.67668e-46	-0.958863	1.72946e-28
CL5748.Contig6_All	1.66	0.8	0.71	1.49	1.32	1.77	0.53	0.74	0.78	0.24	0.1	0.3	-2.31372	1.03072e-46	0.530482	4.18568e-08	-0.619275	1.57683e-07	-2.8442	1.57506e-83	-1.14976	1.7197e-25	-1.69445	3.3758e-21
CL8870.Contig1_All	27.99	10.87	36.58	9.89	4.5	11.64	3.62	10.25	12.88	16.41	28.81	20.55	-0.192687	3.10791e-13	-1.532	0	-1.48447	0	1.33932	0	0.0475276	0.0789864	1.29179	9.67982e-305
CL10812.Contig3_All	5.28	4.67	2.71	2.51	8.68	5.62	1.69	3.75	3.57	1.74	2.06	1.16	-1.34932	5.655e-60	0.410531	1.10647e-11	-0.478341	1.30275e-11	-1.75985	4.79594e-116	-0.888871	1.12126e-40	-0.870982	2.63466e-22
CL14755.Contig3_All	1.86	2.31	0.86	4.04	5.52	4.45	1.22	2.52	2.38	0.43	1.05	0.49	-1.34459	4.47999e-18	1.47992	1.44251e-53	0.294241	0.00474515	-2.82451	3.91512e-121	-1.18568	2.07191e-38	-1.63883	2.4784e-28
CL8003.Contig3_All	0.75	0.98	0.27	1.02	0.8	0.83	0.64	0.85	0.86	0.13	0.17	0.35	-1.60697	1.01158e-14	0.409642	0.00210823	0.240836	0.0374212	-2.01661	2.04311e-25	-0.168806	0.0681168	-1.84781	3.32294e-20
CL10830.Contig5_All	9.23	9.12	7.73	5.62	5.3	5.14	3.12	3.8	4.2	3.48	8	7.52	-0.449584	8.13643e-21	-0.697316	2.83272e-43	-1.21985	2.53553e-107	0.247732	1.33624e-06	-0.522535	5.19038e-17	0.770267	4.83582e-38
CL9924.Contig3_All	4.61	2.58	2.82	2.92	3.35	3.94	1.62	2.97	2.94	1.38	2.34	1.95	-0.81913	2.11463e-64	0.0292431	0.129586	-0.406168	2.06194e-19	-0.848373	6.72307e-70	-0.435411	3.38703e-22	-0.412962	1.22744e-15
CL12808.Contig3_All	0.17	0.48	0.6	1.16	0.75	0.61	0.57	0.46	0.56	0.1	0.31	0.25	-0.89388	0.000163171	1.02383	1.28585e-08	0.3611	0.0265977	-1.91771	9.53483e-20	-0.662727	5.48332e-05	-1.25498	8.05299e-08
CL10948.Contig4_All	3.68	0.92	2.38	1.25	2.56	2.11	2.42	1.76	2.99	1.36	2.48	1.53	-0.371991	7.49909e-05	-0.234993	0.00575627	0.0483783	0.168306	-0.136998	0.0324098	0.283371	0.00139315	-0.420369	9.96927e-06
CL15935.Contig3_All	0.83	0.71	0.56	1.1	1.18	1.96	0.75	1.51	1.55	0.54	1.02	1.55	0.57396	7.86131e-09	1.01708	4.64682e-27	0.87128	2.24042e-19	-0.443124	5.39599e-08	-0.145804	0.0232065	-0.297319	0.00025898
CL8264.Contig15_All	0.62	1.42	0.83	1.04	0.9	0.59	0.81	1.05	1.21	0.91	1.14	1.15	0.164557	0.0402382	-0.179399	0.0424488	0.106171	0.10653	0.343956	0.000741034	0.28557	0.00603986	0.0583862	0.149228
CL7881.Contig4_All	3.51	5.57	3.29	4.79	3.1	3.32	3.95	3.62	5.81	2.7	4.65	6.33	0.160515	0.0258857	-0.136286	0.0525992	0.127658	0.0588964	0.296801	0.0005288	0.263944	0.00289479	0.0328566	0.175402
CL10700.Contig1_All	0.79	0.55	0.74	0.95	0.4	0.83	0.76	0.85	1.11	0.45	0.64	0.31	-0.574323	0.00112967	0.0711054	0.175254	0.392672	0.00676833	-0.645429	0.000187839	0.321567	0.0164694	-0.966995	6.67298e-08
CL15742.Contig22_All	14.21	12.53	14.75	6.91	4.93	8.17	2.21	6.24	7.15	11.48	17.73	8.6	-0.130002	0.000130419	-1.04934	2.55701e-132	-1.39966	7.14285e-207	0.919341	1.88312e-98	-0.350321	9.69408e-11	1.26966	6.70934e-164
CL14535.Contig1_All	6.2	8.71	8.47	26.98	13.03	18.26	26.76	18.94	24.25	3.57	7.84	9.93	-0.114263	0.0325028	1.32347	2.35155e-117	1.59649	4.18545e-186	-1.43773	5.87397e-134	0.273023	2.44718e-10	-1.71075	3.01469e-206
CL740.Contig11_All	1.39	0.92	1	1.22	1.41	0.9	1.27	1.27	1.44	0.33	1.17	1.48	-0.146356	0.0448298	0.0977179	0.0945116	0.271098	0.00251968	-0.244074	0.00381868	0.17338	0.0242664	-0.417454	1.73273e-05
CL4921.Contig16_All	1.31	0.72	0.67	0.83	1.75	1.31	0.99	0.86	0.91	0.24	0.72	0.98	-0.476371	1.41453e-07	0.518995	2.57387e-11	0.0306224	0.195849	-0.995365	6.73049e-32	-0.488372	2.90503e-10	-0.506993	2.3677e-08
Unigene63995_All	13.85	16.32	20	52.29	38.77	14.47	22.49	23.29	16.44	5.2	13.89	13.4	-0.607602	6.11142e-24	1.08182	2.03211e-126	0.332927	6.70452e-11	-1.68942	9.5192e-250	-0.748889	1.88934e-68	-0.940528	8.4651e-61
CL2983.Contig4_All	0.62	0.56	0.57	0.31	0.14	0.22	0.38	0.22	0.59	0.31	0.48	0.36	-0.600328	4.21589e-05	-1.37591	8.13937e-15	-0.548403	0.00017213	0.775586	1.9507e-05	0.827511	1.18347e-05	-0.0519243	0.182786
CL16602.Contig2_All	0.55	0.55	0.46	0.88	0.49	0.28	0.34	0.75	0.55	0.18	0.15	0.29	-1.31369	2.75929e-08	0.0794096	0.173325	0.0791937	0.186023	-1.3931	1.60499e-09	-0.000215871	0.240459	-1.39288	3.15618e-09
Unigene27291_All	3.84	7.28	3.67	3.63	4.89	5.13	1.86	2.59	2.26	1.4	2.67	1.95	-1.29387	8.80836e-94	-0.115099	0.00859298	-1.13243	1.37559e-75	-1.17877	1.86896e-75	-1.01733	6.8001e-59	-0.161444	0.0108745
Unigene848_All	1.96	2.86	1.71	3.08	4.09	4.55	2.35	3.55	4.65	1.07	2.29	2.56	-0.133244	0.0433799	0.844362	1.66294e-25	0.701561	2.45818e-17	-0.977606	1.16953e-32	-0.142801	0.015304	-0.834805	6.06167e-23
CL8685.Contig2_All	5.59	1.87	5.57	3.77	5.13	5.38	3.07	3.05	2.57	1.89	4.96	3.52	-0.32411	2.47951e-06	0.13384	0.0142316	-0.574347	1.49631e-14	-0.45795	1.78987e-11	-0.708186	4.79246e-22	0.250237	0.000576438
CL16220.Contig3_All	1.07	0.4	1.02	0.86	0.65	0.8	0.31	0.93	0.7	0.22	0.26	0.15	-1.97612	8.94281e-21	-0.107333	0.129923	-0.351683	0.0102863	-1.86879	2.01885e-18	-0.244349	0.0412774	-1.62444	4.0662e-13
CL16365.Contig8_All	1.55	2.81	1.36	3.25	2.66	2.71	1.5	2.61	2.53	0.63	1.86	2.58	-0.161967	0.0242628	0.595442	6.57484e-13	0.225639	0.0042907	-0.757409	3.33455e-19	-0.369803	2.14386e-06	-0.387605	9.53745e-06
CL13066.Contig4_All	1.04	0.97	1.66	0.65	1.26	1.22	0.24	0.99	0.92	0.37	0.64	0.36	-1.42479	6.45886e-17	-0.23154	0.0302813	-0.757468	4.30968e-07	-1.19325	7.3766e-12	-0.525928	0.000412891	-0.667324	0.00025037
Unigene65681_All	0.44	0.45	0.2	0.6	0.87	0.84	0.43	0.56	0.99	0.17	0.16	0.14	-1.20545	5.29183e-08	1.08768	8.61498e-13	0.86857	2.92803e-08	-2.29313	2.07781e-34	-0.219112	0.0301773	-2.07402	3.2658e-26
Unigene61206_All	0.44	0.32	0.47	1.43	2.14	1.03	0.61	0.86	1.37	0.59	1.4	0.52	1.03391	1.3358e-08	1.90988	1.26793e-32	1.21692	1.25006e-11	-0.875976	1.77544e-11	-0.692966	5.72454e-08	-0.18301	0.0614462
CL4243.Contig17_All	7.48	8.98	7.5	15.05	15.94	15.51	9.71	14.96	13.31	2.67	5.24	5.94	-0.782809	1.23203e-45	0.959595	2.55975e-121	0.675869	2.28336e-55	-1.7424	2.59362e-304	-0.283726	5.66344e-15	-1.45868	4.88886e-193
Unigene50565_All	88.76	60.75	89.17	141.75	71.88	80.62	64.97	128.07	136.72	60.55	99.72	118.53	0.235697	3.5367e-38	0.307529	1.00127e-64	0.48128	5.15482e-165	-0.071832	7.92359e-06	0.17375	1.94151e-25	-0.245582	3.52926e-48
CL7501.Contig4_All	1.59	2.73	1.87	2.13	2.04	2.7	0.69	1.58	1.6	0.59	0.82	0.54	-1.6677	4.2095e-65	0.151629	0.0113447	-0.668491	4.56289e-16	-1.81933	1.91433e-81	-0.820121	2.31678e-24	-0.999209	8.15256e-20
Unigene13111_All	1.92	0.94	1.22	1.24	1.74	1.65	0.38	0.85	1.05	0.3	0.92	0.47	-1.27186	8.07357e-37	0.183393	0.00660626	-0.830552	5.03462e-19	-1.45525	7.19406e-51	-1.01394	4.56778e-29	-0.441307	5.78008e-05
CL5738.Contig6_All	0.93	0.77	0.91	1.18	1.19	1.07	0.78	1.04	0.97	0.67	0.83	1.01	-0.0450771	0.167297	0.403153	0.000229126	0.104343	0.116283	-0.44823	3.07872e-05	-0.29881	0.00340208	-0.149421	0.0618364
Unigene42397_All	0.29	0.68	0.41	0.43	0.43	0.35	0.54	0.53	0.72	0.47	0.83	0.92	0.701357	0.000509362	-0.181404	0.128892	0.388766	0.0317639	0.88276	2.44823e-05	0.570169	0.00638598	0.312591	0.0369321
CL5399.Contig1_All	3.95	3.1	4.86	5.1	4.08	4.77	2.68	4.25	2.55	2.52	3.05	2.88	-0.491092	1.45866e-15	0.229714	1.30789e-05	-0.32093	6.23831e-08	-0.720806	5.31294e-34	-0.550644	2.60041e-21	-0.170161	0.00318993
CL11911.Contig4_All	1.46	0.9	0.89	1.26	1.82	1.51	0.68	0.78	0.93	0.29	0.43	0.29	-1.67568	2.95252e-24	0.502321	4.72517e-06	-0.43309	0.000515142	-2.178	4.47072e-47	-0.935411	1.95006e-14	-1.24259	2.06047e-12
CL6988.Contig7_All	2.83	2.85	4.14	2.76	3.09	2.51	1.36	1.93	2.12	2.28	5.5	3.47	0.202069	0.00125255	-0.228863	0.00093519	-0.850634	4.67426e-24	0.430932	8.508e-10	-0.621771	8.79402e-13	1.0527	1.50805e-38
Unigene40476_All	0	0	0	0.15	0.54	0.69	0	0	0	0	0	0			5.80961	2.10838e-08			-5.82331	9.74579e-09	-5.79749	2.32657e-08
CL6630.Contig4_All	16.94	28.89	22.51	47.73	38.38	29.18	31.24	38.21	32.81	10.75	11.8	20.19	-0.665229	5.11034e-66	0.759043	8.00281e-138	0.594479	2.40423e-80	-1.42427	0	-0.164564	1.21228e-09	-1.25971	1.90172e-283
CL4788.Contig36_All	1.82	1.1	1.63	2.32	1.54	1.88	1.13	1.07	1.02	0.52	0.89	0.66	-1.13434	3.22049e-26	0.337347	2.35716e-05	-0.492704	1.77112e-07	-1.47169	3.86018e-48	-0.830052	6.74011e-20	-0.641637	2.13395e-08
CL3422.Contig5_All	16.08	25.75	9.74	16.1	27.17	27.25	5.85	12.37	19.69	5.04	6.45	7.45	-1.43609	9.16984e-208	0.453564	4.08645e-41	-0.433075	4.29109e-28	-1.88965	0	-0.886639	2.21521e-130	-1.00301	6.72569e-88
CL870.Contig20_All	5.58	6.82	6.09	9.8	7.42	8.15	11.28	11.52	9.87	4.8	6.86	8.1	0.102827	0.0150003	0.459253	3.92033e-20	0.830395	1.39422e-69	-0.356426	1.2001e-13	0.371142	1.11092e-17	-0.727569	4.95656e-56
CL15641.Contig30_All	1.47	1.03	1.67	1.29	1.98	1.96	0.94	1.29	1.81	0.86	0.7	0.78	-0.83429	7.49751e-22	0.326797	2.33932e-06	-0.0386589	0.17016	-1.16109	2.14086e-45	-0.365456	2.14792e-07	-0.795632	1.07829e-19
CL9412.Contig4_All	4.67	7.53	3.23	4.54	4.46	6.29	1.72	3.59	4.11	2.88	4.15	5.11	-0.337907	5.64476e-08	-0.00987989	0.21501	-0.701692	9.75372e-25	-0.328027	7.93964e-08	-0.691812	5.65029e-24	0.363786	2.29564e-07
Unigene53111_All	0.96	0.69	0.38	0.74	1.2	1.11	0.68	0.93	0.65	0.21	0.59	0.54	-0.58578	0.000974402	0.594767	9.30204e-05	0.167984	0.0989724	-1.18055	8.94377e-12	-0.426782	0.00238853	-0.753764	3.36289e-05
CL7450.Contig7_All	6.87	3.73	6.03	3.16	6.29	4.29	3.02	3.22	4.38	2.02	3.23	2.77	-1.042	6.37658e-39	-0.272694	4.41525e-05	-0.636638	1.36087e-17	-0.769309	1.54022e-20	-0.363944	1.75705e-06	-0.405365	2.52394e-06
CL6681.Contig23_All	1.26	2.04	0.88	1.14	2.29	2.05	2.29	2.38	1.38	2.02	4.93	6.71	1.7216	5.18677e-52	0.392138	0.00228003	0.547713	4.0675e-05	1.32947	2.02048e-36	0.155574	0.0674433	1.17389	6.24805e-30
CL7286.Contig9_All	2.71	2.38	1.64	2.85	5.03	3.6	1.09	3.21	2.29	1.01	0.96	0.68	-1.33413	4.02478e-23	0.773684	1.46236e-16	-0.0117322	0.240608	-2.10782	2.47915e-71	-0.785416	7.35783e-17	-1.3224	1.53825e-22
CL3360.Contig7_All	0.7	1.04	0.32	1.37	0.81	0.87	0.43	0.56	0.96	0.21	0.23	0.27	-1.52357	1.42398e-12	0.564418	8.80498e-05	-0.0763365	0.18012	-2.08799	1.60408e-26	-0.640755	1.55374e-05	-1.44723	3.30106e-11
Unigene26116_All	0.29	0.17	0.23	0.3	0.35	0.29	0.37	0.35	0.33	0.28	0.43	0.29	0.53489	0.0220213	0.447881	0.0446256	0.621177	0.0137839	0.0870093	0.118363	0.173296	0.141769	-0.0862869	0.181037
CL1587.Contig15_All	3.19	1.8	3.17	2.14	1.6	0.57	1.61	2.61	2.47	1.55	3	1.34	-0.470123	4.70525e-14	-0.917827	3.52836e-41	-0.278014	2.76886e-06	0.447704	3.80367e-10	0.639814	4.08575e-19	-0.192109	0.00129107
CL3107.Contig13_All	3.4	1.69	4.09	2.73	3.53	2.95	1.25	4.15	3.67	1.32	2.5	1.75	-0.717455	9.45168e-17	0.00723437	0.226751	-0.00245272	0.254769	-0.724689	2.42327e-17	-0.00968709	0.221446	-0.715002	1.53179e-16
CL11325.Contig1_All	4.38	3.48	1.62	2.99	7.38	3.63	3.79	4.52	3.46	1.26	1.07	1.66	-1.23498	3.86306e-20	0.566577	5.98254e-09	0.329691	0.000597318	-1.80156	2.44683e-49	-0.236886	0.00414478	-1.56467	1.66333e-34
Unigene36175_All	20.79	16.29	20.24	3.68	4.96	9.42	8.5	15	15.39	22.43	27.58	25.6	0.404125	4.52684e-59	-1.66525	0	-0.550557	2.40129e-77	2.06938	0	1.1147	2.03139e-175	0.954681	1.41174e-264
Unigene57937_All	0.44	0.57	0.46	0.44	0.89	0.91	0.34	0.96	0.51	0.27	0.57	0.58	-0.0418152	0.188456	0.606899	0.000134889	0.317373	0.0248433	-0.648714	2.96006e-05	-0.289526	0.0223498	-0.359188	0.0133311
CL37.Contig6_All	4.49	5.69	5.14	7	5.96	7.45	2.12	5.56	4.78	2.04	3.24	2.81	-0.918827	2.06029e-60	0.41628	8.15684e-21	-0.287346	7.08292e-09	-1.33511	7.19657e-145	-0.703626	1.33511e-50	-0.631481	8.41213e-27
CL2833.Contig10_All	28.67	55.59	31.01	50.05	42.3	38.51	47.17	48.66	58.03	28.37	46.52	54.89	0.181296	4.82614e-13	0.186906	1.27057e-13	0.42756	1.4367e-68	-0.00561078	0.127149	0.240654	2.36719e-24	-0.246265	1.3874e-25
Unigene39721_All	0.41	0.18	0.24	0.82	0.29	0.71	0.12	0.23	0.18	0.23	0.46	0.23	0.178946	0.170301	1.1491	0.00370034	-0.625303	0.0918133	-0.970153	0.00474441	-1.7744	0.000166316	0.80425	0.0478241
CL6385.Contig3_All	25.01	13.41	23.73	21.55	27.04	20.22	26.73	18.08	21.55	8.39	22.93	18.54	-0.307892	2.05601e-16	0.150793	7.43082e-06	0.104353	0.00125097	-0.458685	4.5936e-36	-0.0464401	0.0522664	-0.412245	1.07246e-28
CL10823.Contig4_All	0.9	0.9	0.6	1.45	0.49	1.46	0.46	0.9	1	0.32	0.84	0.37	-0.633726	0.00021517	0.509981	0.000321725	-0.00671876	0.253249	-1.14371	4.1762e-12	-0.5167	0.000291779	-0.627007	0.000268425
CL3907.Contig1_All	0.85	1.09	0.88	0.97	0.51	0.6	0.49	0.46	0.49	0.42	0.95	0.43	-0.642988	0.000574489	-0.430324	0.00991729	-0.949106	5.9059e-06	-0.212664	0.0555736	-0.518782	0.00898384	0.306118	0.0561702
CL3306.Contig3_All	18.66	21.04	21.45	26.72	29.22	18.9	25.89	24.33	26.62	11.69	16.32	19.09	-0.362218	2.91715e-15	0.297253	4.54157e-13	0.345716	3.17981e-17	-0.659472	3.52837e-51	0.0484624	0.0624407	-0.707934	4.90858e-59
CL14559.Contig2_All	0.69	0.63	0.31	0.78	0.44	0.45	0.14	0.19	0.42	0.28	0.54	0.69	-0.093964	0.18141	0.0423922	0.22181	-1.1001	0.00340607	-0.136356	0.10953	-1.14249	0.00232554	1.00614	0.00585894
CL14080.Contig2_All	0.84	2.1	1.23	4.26	5.66	3.77	4.06	3.33	4.6	0.88	1.41	0.89	-0.382665	0.00883031	1.71705	2.85208e-44	1.53452	1.48749e-33	-2.09971	4.28763e-58	-0.18253	0.0171758	-1.91718	1.91987e-45
CL83.Contig7_All	3.05	2.19	2.71	2.36	3.1	2.89	3.46	3.25	2.75	1.7	2.95	3.95	0.123368	0.0531945	0.0722234	0.124361	0.260824	0.00239086	0.0511443	0.0946653	0.1886	0.0147222	-0.137456	0.0392441
Unigene29385_All	1.03	0.85	0.75	0.52	0.36	0.59	0.6	1.24	0.89	1.07	1.96	0.87	0.570789	1.08728e-09	-0.834595	5.2149e-12	0.0675221	0.147651	1.40538	1.63359e-37	0.902118	6.26448e-14	0.503267	4.89552e-08
CL6558.Contig6_All	4.08	3.05	4.69	3.9	4.65	2.59	2.51	4.17	3.75	2.43	2.4	3.36	-0.521834	7.55358e-15	-0.0824256	0.055832	-0.170195	0.00300835	-0.439409	4.68482e-11	-0.0877699	0.0521559	-0.351639	2.26073e-07
Unigene1160_All	1.33	0.75	1.23	1.15	1.45	0.95	0.55	1	0.84	0.43	0.91	0.93	-0.540327	2.65341e-06	0.104335	0.0922316	-0.461582	4.63896e-05	-0.644662	1.16006e-08	-0.565918	6.26215e-07	-0.0787446	0.136715
CL13624.Contig6_All	0.52	0.76	0.37	0.58	1.16	0.36	0.74	0.97	0.62	0.41	0.55	0.51	-0.168064	0.0703182	0.343564	0.00527119	0.499468	0.000128055	-0.511628	9.3534e-05	0.155904	0.0665148	-0.667533	1.06407e-06
CL3007.Contig1_All	1.35	0.73	1.34	1.13	1.43	1.62	0.26	1.03	1.06	0.47	0.64	0.51	-1.08016	1.37944e-26	0.284435	0.000166274	-0.536404	4.2833e-09	-1.3646	1.28687e-45	-0.820839	1.328e-20	-0.543757	4.99895e-07
CL337.Contig8_All	2.09	2.91	3.11	2.15	2.73	2.28	0.88	2.3	1.66	1.68	2.51	1.8	-0.435894	3.12937e-11	-0.179846	0.00182844	-0.735401	1.6156e-25	-0.256048	4.43324e-05	-0.555554	1.63871e-14	0.299507	3.16225e-05
Unigene61533_All	12.48	8.95	17.62	10.74	12.55	15.85	9.77	9.77	4.39	8.72	12.86	13.77	-0.130781	0.00344927	0.00735852	0.217896	-0.689785	9.89789e-34	-0.138139	0.00144738	-0.697143	2.0119e-34	0.559004	5.21071e-22
Unigene53859_All	0.89	0.3	1.19	0.49	0.45	0.56	0.34	0.52	0.64	0.15	0.29	0.12	-2.09345	9.65685e-31	-0.661017	1.65495e-06	-0.6515	2.37357e-06	-1.43243	6.82421e-13	0.00951679	0.232848	-1.44195	9.39383e-13
CL8785.Contig14_All	1.69	3.11	1.26	6.92	10.51	8.07	11.46	9.03	7.95	0.6	1.05	0.83	-1.27412	2.36434e-20	2.0763	3.3994e-157	2.24126	6.1279e-193	-3.35042	8.95834e-264	0.164967	0.000709571	-3.51538	9.11466e-306
CL14719.Contig1_All	3.14	3.86	3.42	7.07	8.12	9.65	3.83	5.31	7.18	2.05	3.68	3.96	-0.102069	0.0261565	1.25359	5.92519e-147	0.653272	9.92148e-34	-1.35566	6.73942e-167	-0.600321	2.53214e-43	-0.755341	3.13069e-43
CL3599.Contig9_All	4.15	4.25	2.59	3.53	5.32	4.21	1.15	2.14	2.39	1.33	1.85	2.8	-0.870484	6.56019e-29	0.250523	4.54837e-05	-0.943078	1.94453e-32	-1.12101	5.45074e-51	-1.1936	3.63551e-55	0.0725942	0.11059
CL8810.Contig4_All	5.53	4.83	5.06	9.6	9.29	10.15	8.84	8.98	9.02	1.41	3.03	4.23	-0.82187	1.48005e-34	0.915465	2.58768e-75	0.807246	1.08905e-56	-1.73734	1.95345e-202	-0.108219	0.00452202	-1.62912	7.90264e-171
CL14426.Contig2_All	0.98	0.59	0.55	0.93	0.85	1.4	0.32	0.94	0.74	0.13	0.35	0.4	-1.26098	1.39079e-16	0.593621	5.71762e-08	-0.0709018	0.16027	-1.8546	3.96145e-41	-0.664523	2.68742e-09	-1.19008	1.41371e-14
CL1043.Contig24_All	0.8	1.34	0.93	0.57	0.6	1.12	0.67	0.86	1.16	0.89	1.12	0.79	-0.13487	0.0604305	-0.419336	0.000181543	-0.189234	0.0325518	0.284466	0.0037354	0.230102	0.0199606	0.0543636	0.157498
CL16927.Contig15_All	1.12	1.51	0.94	1.02	0.3	1.1	0.29	0.79	1.21	2.39	3.02	3.06	1.25574	3.73114e-31	-0.560643	7.1205e-05	-0.627079	1.53339e-05	1.81638	1.55069e-52	-0.0664368	0.176256	1.88282	1.63775e-54
CL8314.Contig7_All	3.74	4.21	3.05	4.73	5.47	4.48	1.56	4.12	3.72	1.41	2.71	2.74	-0.670465	5.34291e-12	0.420013	1.45411e-07	-0.210857	0.00764882	-1.09048	4.93897e-33	-0.63087	8.24532e-14	-0.459608	3.10226e-06
CL1832.Contig10_All	1.73	1.79	1.9	1.34	2.94	3.37	1.44	1.7	1.83	0.78	1.63	2.63	-0.0982431	0.0912869	0.497346	2.17862e-07	-0.116602	0.0869517	-0.595589	6.71896e-10	-0.613948	6.22736e-10	0.0183589	0.205486
CL16102.Contig1_All	9.71	6.78	9.5	9.86	7.14	9.14	12.6	9.11	9.33	5.3	8.8	8.49	-0.200216	2.37709e-12	0.00989846	0.183267	0.257039	8.46022e-22	-0.210114	1.07782e-13	0.247141	2.56359e-20	-0.457255	4.47358e-61
CL4558.Contig1_All	6.26	6.89	6.11	5.38	9.58	7.31	3.5	7.4	4.97	2.87	5.99	5.23	-0.440355	1.50844e-10	0.213171	0.000269915	-0.262083	5.42395e-05	-0.653526	1.15118e-22	-0.475254	3.13632e-13	-0.178272	0.00485298
CL4514.Contig3_All	1.28	0.56	1.12	1.31	1.88	2.07	0.77	1.06	1.42	0.25	0.54	0.64	-1.03994	2.52257e-19	0.82889	7.66861e-23	0.136501	0.0485324	-1.86883	4.99858e-77	-0.692389	4.05077e-17	-1.17644	3.96233e-25
CL5956.Contig4_All	0.82	0.79	0.59	1.62	2.29	1.69	1.4	1.85	1.73	0.53	1.26	0.78	0.228354	0.0369902	1.34933	2.1338e-26	1.18555	1.08498e-19	-1.12098	1.22561e-20	-0.163786	0.0349369	-0.957195	1.4991e-14
CL2306.Contig5_All	1.52	1.13	2.94	2.93	3.16	1.98	6.52	3.97	3.97	1.67	1.35	2.24	-0.0828138	0.0699763	0.53162	4.48033e-15	1.3738	1.06947e-119	-0.614434	1.8818e-19	0.842177	5.99838e-55	-1.45661	2.93779e-131
CL12257.Contig6_All	0.93	1.22	0.94	1.45	1.44	1.68	0.91	1.1	2.27	0.2	0.43	0.41	-1.55113	7.70251e-08	0.571802	0.0020446	0.488994	0.00712578	-2.12293	9.3763e-16	-0.0828082	0.170106	-2.04012	5.01151e-14
Unigene53451_All	5.23	2.59	5.38	4.03	5.31	5.77	1.62	3.58	4.34	1.28	2.18	1.88	-1.30091	2.52611e-101	0.195211	1.53841e-05	-0.460078	2.46872e-18	-1.49612	7.14311e-143	-0.655288	1.50439e-37	-0.840831	3.83077e-37
CL1858.Contig9_All	0.48	0.37	0.8	0.76	0.37	0.76	0.55	0.57	1.08	0.21	0.68	0.7	-0.0503241	0.17774	0.190119	0.0725567	0.41328	0.00380721	-0.240443	0.0262854	0.223161	0.0453522	-0.463604	0.00142032
Unigene54508_All	0.89	0.91	1.17	1.08	1.91	1.89	0.64	1.38	0.98	0.38	0.5	0.93	-0.700038	0.000117419	0.718465	1.23245e-06	0.0325906	0.225842	-1.4185	5.26562e-17	-0.685874	3.19483e-06	-0.732629	6.24271e-05
Unigene64229_All	0.51	0.32	0.24	0.48	0.46	0.63	0.24	0.26	0.56	0.24	0.4	0.43	0.00785316	0.219435	0.562434	0.00750528	0.00122863	0.25687	-0.55458	0.0044249	-0.561205	0.00774008	0.00662453	0.22818
CL6147.Contig7_All	9.18	4.74	6.8	3.66	5.24	5.19	1.02	3.5	3.24	1.22	3.45	2.27	-1.5749	8.56158e-217	-0.555363	1.21258e-39	-1.40577	9.12541e-182	-1.01954	1.96552e-76	-0.850408	5.47667e-56	-0.169133	0.00277417
Unigene26056_All	0.94	1.09	0.7	1.13	1.69	1.22	1.13	1.17	1.68	0.69	0.58	0.74	-0.430332	0.00136937	0.570794	3.13769e-06	0.552577	6.91094e-06	-1.00113	6.02707e-14	-0.018217	0.215971	-0.982909	3.98654e-13
CL69.Contig8_All	6.43	2.73	8.09	1.84	0.74	1.13	0.56	1.1	0.91	6.36	10.7	9.1	0.603808	5.88379e-67	-2.21488	0	-2.73515	0	2.81869	0	-0.520261	8.51005e-09	3.33895	0
CL3701.Contig1_All	8.8	4.49	6.94	2.97	4.2	6.12	1.23	3.9	5.02	2	3.03	2.04	-1.51059	1.08685e-119	-0.605368	1.39802e-27	-0.98432	2.6686e-61	-0.905225	1.73451e-36	-0.378952	5.82942e-09	-0.526273	5.17909e-12
CL14946.Contig20_All	6.55	4.98	2.75	5.95	3.04	4.83	6.81	8.55	3.71	3.18	2.39	5.51	-0.357308	1.56838e-13	-0.0428372	0.098612	0.426964	2.16149e-23	-0.31447	5.20672e-11	0.469801	1.72417e-27	-0.784272	2.00831e-66
Unigene32106_All	0.36	0.48	0.13	0.48	0.65	0.57	0.21	0.58	0.52	0.1	0.07	0.1	-1.84885	4.03924e-11	0.801089	4.10147e-06	0.4346	0.00857368	-2.64994	3.76062e-27	-0.366489	0.00965911	-2.28345	3.80221e-18
CL1570.Contig2_All	1892.9	1949.1	3800.74	1907.19	856.23	1595.83	778.26	1921.63	1711.06	1778.28	2197.21	1549	-0.459158	0	-0.804914	0	-0.776177	0	0.345756	0	0.0287368	1.33001e-10	0.31702	0
CL4016.Contig11_All	3.25	1.29	3.25	1.38	1.62	1.71	0.33	1.24	0.91	0.69	1.61	0.79	-1.32943	1.09686e-44	-0.726291	1.71103e-17	-1.63991	9.79434e-60	-0.603136	5.61434e-09	-0.913615	8.677e-16	0.310478	0.00451719
CL11890.Contig5_All	1.69	1.06	1.13	1.84	2.04	1.71	0.55	1.49	1.67	0.61	1.08	0.97	-0.539591	7.59638e-07	0.528021	1.12809e-08	-0.0582848	0.161297	-1.06761	1.6025e-25	-0.586306	4.71306e-10	-0.481306	1.07458e-05
Unigene22290_All	8.73	10.78	9.36	14.42	18.25	16.18	11.44	18.71	21.31	7.8	7.59	5.56	-0.445839	5.96121e-08	0.766579	6.22168e-29	0.858876	7.84026e-37	-1.21242	1.39291e-60	0.0922968	0.0365748	-1.30472	2.11243e-71
Unigene31699_All	0.39	0.24	0.42	0.62	0.41	0.22	0.21	0.62	0.71	0.19	0.31	0.1	-0.822304	0.00208214	0.244638	0.0922023	0.549508	0.00784526	-1.06694	5.18194e-05	0.30487	0.0541686	-1.37181	2.87681e-07
CL17158.Contig15_All	0.5	0.71	0.46	1.33	2.9	1.4	1.5	3.23	1.3	1.01	1.44	2.39	1.54477	3.2394e-56	1.75541	8.10232e-77	1.86613	1.27611e-89	-0.210635	0.000723274	0.110719	0.0327386	-0.321354	2.54462e-06
CL9.Contig6_All	1.09	1.03	1.52	2.17	1.58	1.19	1.68	1.94	1.21	1.1	1.87	1.88	0.418493	0.00023221	0.442356	0.000130429	0.414857	0.000332258	-0.0238637	0.129223	-0.0274994	0.202129	0.00363565	0.227352
CL16447.Contig11_All	2.01	1.15	1.93	3.11	1.87	2.74	2.94	1.46	3.5	1.67	1.38	1.26	-0.233824	0.0139225	0.60726	2.06929e-09	0.642452	2.2323e-10	-0.841084	1.19011e-15	0.0351921	0.179125	-0.876276	1.22646e-16
CL10120.Contig3_All	2.57	1.35	2.3	1.33	1.8	1.68	0.37	1.14	1.62	0.5	1.55	1.3	-0.885538	3.79493e-27	-0.371027	4.41083e-07	-0.978618	2.19243e-31	-0.514511	1.26215e-09	-0.607591	7.81323e-12	0.0930801	0.0892149
CL3969.Contig6_All	1.26	0.99	0.44	1.03	2.98	1.95	1.37	1.38	1.64	0.32	0.5	0.31	-1.24	1.36272e-27	1.14697	9.64834e-52	0.710715	2.88648e-18	-2.38696	1.14792e-143	-0.436252	5.01102e-11	-1.95071	9.06853e-83
CL2616.Contig20_All	4.47	4.7	8.28	6.64	5.79	4.74	4.34	7.09	7.38	5.99	5.4	1.89	-0.391005	1.55099e-10	-0.020097	0.18494	0.118874	0.0131185	-0.370908	7.59909e-10	0.138971	0.00543434	-0.509879	4.1487e-17
Unigene56709_All	2.94	3.31	2.79	2.46	7.3	3.58	6.45	6.78	2.66	0.68	1.71	2.71	-0.823263	5.75497e-42	0.560236	1.27614e-31	0.8205	1.65164e-71	-1.3835	1.68989e-139	0.260264	2.48869e-10	-1.64376	2.84628e-213
CL8479.Contig4_All	2.04	1.64	2.03	2.81	2.24	2.09	1.34	2	1.95	0.73	1.77	1.29	-0.5837	2.16436e-08	0.326313	0.000152299	-0.0995259	0.0936377	-0.910012	7.46073e-20	-0.425838	2.48952e-06	-0.484174	3.80305e-06
CL14506.Contig15_All	1	1.09	0.78	1.51	0.69	1.04	0.95	1.85	0.75	0.63	0.73	1.38	-0.0520453	0.169683	0.178376	0.0646451	0.325311	0.00828866	-0.230421	0.0207208	0.146935	0.0819654	-0.377357	0.00291905
CL4655.Contig4_All	12.47	9.13	8.93	6.25	10.24	8.77	4.53	6.21	4.43	4.62	7.22	7.66	-0.638299	2.28038e-36	-0.271201	7.41095e-09	-0.996683	2.51975e-75	-0.367098	1.56094e-12	-0.725481	3.3521e-37	0.358384	1.55305e-09
CL17162.Contig15_All	1.85	2.06	1.63	1.55	3.13	3.33	0.79	2.82	1.87	0.77	0.99	0.69	-1.1727	2.03691e-26	0.53173	7.0151e-11	-0.00105354	0.256619	-1.70443	2.27001e-64	-0.532784	7.42551e-11	-1.17165	3.19809e-26
CL2601.Contig10_All	2.02	1.68	1.98	1.45	2.73	1.89	1.01	1.87	1.64	0.43	1.06	0.49	-1.51992	6.9235e-48	0.0978174	0.0629599	-0.321138	7.58051e-05	-1.61773	4.63414e-56	-0.418955	3.13596e-07	-1.19878	2.28087e-27
CL11651.Contig4_All	2.06	2.9	2.33	7.44	6.21	6.49	7.63	6.71	6.85	0.64	1.01	1.56	-1.16271	3.73784e-10	1.47371	1.17236e-34	1.5632	8.41508e-40	-2.63642	8.66123e-73	0.08949	0.091694	-2.72591	2.0911e-79
CL7031.Contig4_All	9.33	5.53	6.61	3.79	5.75	5.65	0.97	4.34	3.42	3.01	4.24	3.56	-0.985904	7.1118e-120	-0.497817	3.01363e-37	-1.28563	4.17912e-181	-0.488087	1.57963e-26	-0.787818	2.59123e-58	0.299731	7.86411e-09
CL16340.Contig22_All	5.4	7.59	8.06	8.03	6.8	8.4	2.89	6.11	6.34	4.13	8.62	6.79	-0.105798	0.000893554	0.142781	1.11789e-05	-0.449535	5.18351e-33	-0.248579	1.48372e-13	-0.592316	1.45503e-58	0.343737	1.49254e-19
CL7500.Contig1_All	0.66	0.41	0.59	0.65	1.04	0.62	0.49	0.62	0.68	0.3	0.25	0.53	-0.605499	0.0110416	0.485837	0.0146149	0.127769	0.172242	-1.09134	1.11727e-05	-0.358067	0.0399064	-0.733269	0.00341569
Unigene37967_All	14.35	12.13	14.03	18.06	17.44	14.22	19.42	16.97	16.5	7	12.44	13.24	-0.300819	4.72912e-12	0.299478	3.83985e-14	0.394645	7.9207e-24	-0.600297	6.06572e-47	0.0951674	0.00386631	-0.695464	1.0963e-63
CL11029.Contig2_All	0.53	0.53	0.19	2.27	1.34	1.09	0.23	0.89	0.6	0.14	0.22	0.31	-0.894364	1.2031e-05	1.90664	6.29994e-47	0.469972	0.00223867	-2.80101	5.48278e-74	-1.43667	8.26513e-32	-1.36434	3.33231e-12
CL5547.Contig1_All	0.45	0.61	0.17	0.65	0.58	0.6	0.52	0.4	0.57	0.19	0.27	0.29	-0.712784	0.00213522	0.583602	0.00206253	0.275067	0.0670062	-1.29639	1.29819e-08	-0.308534	0.0380661	-0.987851	3.34673e-05
CL4721.Contig3_All	0.51	0.68	0.73	0.68	0.8	0.89	1.3	0.75	1.21	0.39	0.69	0.94	0.0827099	0.161215	0.307778	0.0377318	0.77271	1.40805e-05	-0.225068	0.0427069	0.464932	0.00295497	-0.69	5.8624e-05
CL6897.Contig3_All	1.01	0.36	0.43	0.9	1.89	1.7	1.59	1.75	0.84	0.29	0.85	0.4	-0.218647	0.0454341	1.3183	8.38059e-27	1.2226	1.53766e-22	-1.53695	7.90533e-34	-0.0957072	0.0938596	-1.44124	1.10578e-28
Unigene86689_All	0.56	0.33	0.58	0.56	0.15	0.31	0.2	0.32	0.49	0.93	1.22	0.55	0.876118	7.02365e-05	-0.535491	0.023577	-0.539966	0.0245624	1.41161	1.14905e-08	-0.00447538	0.239876	1.41608	2.04975e-08
Unigene57223_All	2.86	2.38	3.8	4.77	2.23	3.67	1.56	2.82	2.62	1.95	2.38	1.32	-0.676516	2.76365e-22	0.241054	2.50375e-05	-0.360843	3.24942e-08	-0.91757	6.79529e-43	-0.601896	3.65449e-21	-0.315674	9.75813e-06
CL8407.Contig1_All	1.42	0.99	1.43	1.94	1.67	1.37	1.58	1.58	1.39	0.74	1.53	1.03	-0.223516	0.00529332	0.374153	5.034e-06	0.246582	0.00182096	-0.597669	3.56983e-12	-0.127571	0.0360865	-0.470098	9.03323e-08
CL2616.Contig12_All	9.95	6.49	5.46	6.68	3.02	4.95	4.16	5.9	5.77	6.89	13.47	11.8	0.558092	3.34887e-87	-0.575461	1.08382e-62	-0.461698	1.84978e-42	1.13355	1.61062e-290	0.113762	0.00090955	1.01979	9.8265e-244
CL822.Contig13_All	4.13	5.09	2.77	6.26	3.37	3.17	4.12	4.22	5.77	4.8	7.61	10.05	0.912423	1.14814e-79	0.0986247	0.0241516	0.241991	4.36887e-06	0.813798	3.41601e-66	0.143367	0.00274161	0.670432	2.44178e-47
CL7428.Contig2_All	2.17	3.5	1.89	3.14	3.17	2.21	2.5	3.13	5.63	5.28	5.68	4.63	1.05191	7.15253e-36	0.177048	0.022613	0.584609	1.1522e-10	0.874859	3.65423e-27	0.407561	2.30446e-06	0.467297	4.71556e-10
CL16268.Contig2_All	1.88	4.42	1.85	2.67	3.5	2.8	3.49	2.21	1.35	1.37	0.52	1.36	-1.31671	9.00241e-21	0.14251	0.057342	-0.197596	0.0301492	-1.45922	1.66436e-26	-0.340106	0.0011338	-1.11911	1.50173e-14
CL5770.Contig3_All	10.55	5.12	5.79	5.29	6.64	7.72	1.45	3.25	3.92	1.79	2.88	1.81	-1.71999	1.84134e-142	-0.124232	0.00551807	-1.30365	2.92504e-94	-1.59576	4.8644e-118	-1.17942	3.99003e-74	-0.416342	4.4191e-07
CL12304.Contig3_All	0.84	1.27	0.65	1.3	2.38	2.13	0.64	1.28	1.32	0.26	0.51	0.74	-0.85508	2.21317e-08	1.07622	8.76635e-22	0.24719	0.0194746	-1.9313	3.38706e-50	-0.829033	1.16549e-14	-1.10227	1.40701e-13
CL6689.Contig3_All	0.88	1.18	0.37	0.93	0.63	0.61	0.15	0.37	0.21	0.36	0.3	0.67	-0.868111	1.11769e-07	-0.161561	0.0793491	-1.73413	8.75676e-19	-0.70655	1.05957e-05	-1.57257	5.4673e-15	0.86602	5.70182e-05
CL14159.Contig3_All	0.54	0.47	0.31	0.73	0.56	0.42	0.54	0.59	0.51	0.57	0.41	0.91	0.52758	0.00282753	0.383572	0.0205296	0.326128	0.039068	0.144008	0.0727129	-0.057444	0.193653	0.201452	0.0778211
Unigene37666_All	0.39	0.32	0.32	0.34	0.52	1.08	0.18	0.37	0.24	0.15	0.12	0.06	-1.61886	0.000176321	0.919695	0.000843985	-0.33347	0.109494	-2.53856	4.32438e-11	-1.25317	3.77108e-05	-1.28539	0.00303931
CL7377.Contig6_All	3.86	2.05	2.79	3.16	4.07	5.05	0.99	2.01	2.26	0.6	1.11	0.91	-1.72772	6.55272e-108	0.499216	6.8838e-21	-0.718256	1.33879e-27	-2.22693	1.42054e-211	-1.21747	1.24446e-89	-1.00946	5.5566e-30
Unigene28320_All	7.23	3.43	7.11	7.21	1.88	6.06	2.3	6.95	9.91	4.02	3.85	0.92	-1.01199	7.88973e-37	-0.225797	0.0004934	0.122392	0.0214618	-0.786188	1.1333e-21	0.348189	2.04171e-07	-1.13438	1.94839e-47
Unigene65672_All	7.3	4.66	3.79	5.42	5.56	3.9	8.41	6.05	6.33	7.53	11.19	10.17	0.88506	1.93484e-45	-0.0777765	0.0831767	0.410767	1.04893e-09	0.962837	2.5142e-52	0.488543	1.13748e-12	0.474293	3.01491e-16
CL731.Contig3_All	14.48	7.94	10.3	4.19	5.33	7.07	1.31	4.03	3.81	1.52	3.6	2.24	-2.14825	1.60207e-296	-0.97827	7.05813e-93	-1.82521	1.39508e-237	-1.16998	2.1408e-64	-0.84694	6.92996e-38	-0.323038	2.33723e-05
CL11532.Contig3_All	0.81	0.59	1.24	0.41	1.64	1.12	0.8	1.76	1.03	0.36	0.24	0.68	-1.03405	2.31156e-10	0.258863	0.016604	0.456041	0.000174272	-1.29292	1.25011e-16	0.197178	0.033598	-1.4901	2.35184e-22
CL7115.Contig4_All	1.92	1.34	1.51	1.75	2.35	2.84	0.76	1.78	1.19	0.6	1.28	0.92	-0.762504	4.74272e-10	0.545498	2.38757e-08	-0.33853	0.00144749	-1.308	3.97078e-31	-0.884028	5.5724e-17	-0.423974	0.000498857
Unigene61553_All	3.4	1.8	3.46	3.01	3.36	3.13	2.09	2.25	2.4	1.43	2.86	2.9	-0.257967	0.00340547	0.138873	0.0430947	-0.348584	0.000321328	-0.39684	1.41757e-05	-0.487457	7.12497e-07	0.0906167	0.103519
CL5294.Contig1_All	0.83	0.66	0.9	0.53	0.65	0.62	0.62	0.24	0.46	0.3	0.53	0.99	-0.380825	0.0226695	-0.405768	0.0208132	-0.84893	0.000161981	0.0249427	0.140804	-0.443162	0.0261375	0.468104	0.0192721
CL4944.Contig3_All	0.95	0.54	0.84	1.06	1.08	1.08	0.7	1.39	0.91	0.33	0.6	0.65	-0.560348	1.3229e-06	0.465284	1.95368e-06	0.370424	0.000138995	-1.02563	8.6975e-21	-0.0948596	0.0887948	-0.930773	1.17893e-16
Unigene61039_All	7.03	6.68	11.04	8.86	10.24	8.14	6.64	8.19	4.4	4.51	4.64	6.45	-0.655924	4.05555e-25	0.14185	0.00378778	-0.34937	4.54373e-09	-0.797774	3.19476e-38	-0.49122	7.26424e-17	-0.306553	2.54665e-06
Unigene4141_All	1.67	0.7	1.12	1.89	1.67	1.35	1.45	1.61	1.62	1.18	1.9	1.84	0.504079	4.18499e-05	0.49371	7.0653e-05	0.435268	0.000433543	0.0103694	0.143012	-0.0584422	0.163471	0.0688117	0.141791
CL8224.Contig1_All	4.63	6.22	4	8.48	10.61	8.95	5.54	8.83	6.28	1.76	2.31	3.25	-1.01319	2.69666e-42	0.919578	1.98681e-66	0.488171	1.80262e-17	-1.93276	2.89023e-204	-0.431408	1.35198e-18	-1.50136	1.93904e-106
CL1176.Contig19_All	27.22	16.51	22.44	18.27	29.1	34.73	7.03	12.08	11.89	5.79	12.9	11.19	-1.13973	1.14559e-210	0.313169	9.21839e-28	-1.08182	4.85825e-192	-1.4529	0	-1.39499	0	-0.0579059	0.0529558
CL6579.Contig6_All	3.77	3.33	3.47	5.37	5.26	3.98	1.78	3.52	4.9	1.88	3.29	3.73	-0.2416	0.000172175	0.469077	1.43731e-14	-0.0444735	0.14494	-0.710677	3.36304e-29	-0.51355	8.9783e-17	-0.197126	0.0016441
CL1725.Contig7_All	12.12	21.08	5.85	18.58	25.94	19.58	11.46	16.31	21.84	3.36	5.1	7.22	-1.30306	6.25273e-92	0.718963	9.78486e-57	0.359757	6.14605e-14	-2.02202	2.29114e-280	-0.359207	2.7373e-17	-1.66281	2.56952e-167
CL802.Contig5_All	0.61	1.29	0.74	0.41	0.89	1.23	0.24	0.55	0.62	0.27	0.42	0.12	-1.70739	1.04111e-29	-0.0589427	0.157114	-0.885791	1.10829e-11	-1.64844	1.44467e-27	-0.826848	3.16738e-10	-0.821596	1.44035e-06
CL15598.Contig5_All	11.52	6.21	8.64	7.1	12.35	8.99	15.13	7.23	12.48	2.71	8.18	3.91	-0.82527	1.81899e-34	0.112383	0.0163316	0.410857	4.19203e-14	-0.937653	7.25437e-46	0.298474	1.52425e-08	-1.23613	1.08134e-85
CL4810.Contig5_All	22.89	12.41	25.35	29.76	19.06	24.51	15.24	31.01	30.2	4.31	8.53	6.63	-1.63289	0	0.277811	6.12135e-22	0.345716	1.38516e-33	-1.9107	0	0.0679053	0.00458288	-1.97861	0
CL2468.Contig31_All	0.85	0.9	0.72	1.67	1.43	1.29	1.48	1.73	1.48	0.66	1.25	1.46	0.45355	1.21233e-05	0.834458	2.32009e-16	0.930919	1.8863e-20	-0.380908	1.23426e-05	0.096461	0.0764461	-0.477369	1.2726e-07
CL3130.Contig4_All	4.71	8.94	4.73	10.93	8.3	7.24	8.49	20.39	11.61	5.36	5.26	8.25	0.043753	0.082335	0.528858	1.1657e-37	1.15139	5.31973e-212	-0.485105	5.57079e-33	0.62253	2.08203e-75	-1.10763	2.80697e-200
CL13164.Contig24_All	1.07	3.29	3.02	9.71	8.72	2.78	13.99	11.58	13.34	4.41	5.31	7.86	1.26233	7.34598e-61	1.52759	6.30433e-96	2.40734	0	-0.265261	1.61989e-06	0.879753	2.57972e-73	-1.14501	3.8964e-113
CL2992.Contig10_All	6.34	10.28	7.83	9.47	6.1	5.79	4.27	5.37	6.4	4.82	11.73	10.94	0.176508	6.69734e-05	-0.190489	6.70364e-05	-0.598977	1.86071e-28	0.366997	1.59533e-14	-0.408488	2.09247e-13	0.775485	1.5672e-49
CL15478.Contig2_All	4.84	4.72	4.43	5.94	6.01	4.92	1.7	3.93	4.11	1.73	3.12	2.53	-0.918423	6.47904e-44	0.272488	2.231e-07	-0.511581	1.04175e-16	-1.19091	8.84459e-80	-0.784069	3.96945e-40	-0.406842	9.48313e-09
CL7304.Contig5_All	6.26	5.79	5.67	7.22	6.7	4.83	6.66	5.77	7.22	3.54	7.44	7.27	0.0483286	0.0854157	0.0841764	0.0296367	0.154996	0.000801615	-0.0358478	0.0768844	0.0708193	0.0453946	-0.106667	0.00961523
Unigene28013_All	1.27	0.9	0.47	0.67	1.39	1.68	0.27	0.9	1.15	0.28	0.35	0.51	-1.21172	1.63278e-32	0.499771	3.30387e-11	-0.181045	0.0123191	-1.71149	9.86915e-75	-0.680817	4.5097e-18	-1.03068	1.37461e-22
CL225.Contig31_All	2.18	3.56	2.99	4.86	4.94	3.99	3.61	4.98	5.69	2.06	4.07	3.85	0.196724	0.000282154	0.661071	4.42003e-34	0.716351	2.65161e-40	-0.464348	2.5538e-19	0.0552797	0.0717319	-0.519627	1.14306e-23
CL13106.Contig62_All	0.43	0.37	0.18	0.32	0.46	0.45	0.38	0.6	0.21	0.06	0.09	0.17	-1.55981	9.73727e-15	0.34119	0.00688741	0.29524	0.0159231	-1.901	1.30993e-23	-0.0459499	0.187596	-1.85505	7.04548e-22
Unigene50610_All	0.66	0.28	0.41	0.36	0.64	0.52	0.29	0.7	0.97	0.21	0.45	0.31	-0.47484	0.0103961	0.16961	0.110091	0.553774	0.00142283	-0.64445	0.000688133	0.384165	0.0124289	-1.02861	2.66835e-07
CL5491.Contig6_All	0.81	0.63	1.1	1.5	2.18	0.69	1.76	1.52	0.9	0.61	1.3	1.12	0.260223	0.026062	0.787201	1.87664e-08	0.729071	2.36716e-07	-0.526979	2.47016e-05	-0.0581302	0.166571	-0.468848	0.000247412
CL7792.Contig2_All	4	4.44	3.02	5.16	7.15	7.89	3.41	4.81	7.01	2.42	2.47	2.12	-0.698311	7.22128e-12	0.82149	5.0563e-25	0.423858	3.67204e-07	-1.5198	8.16387e-65	-0.397632	4.43933e-08	-1.12217	1.6398e-31
CL15543.Contig12_All	0.45	0.95	0.66	0.87	0.54	0.67	1.33	1.07	0.61	0.54	0.38	0.74	-0.304675	0.028627	0.0165084	0.227012	0.557102	0.000263893	-0.321183	0.0154265	0.540593	0.000353325	-0.861776	2.16207e-07
CL1238.Contig12_All	7.44	5.65	5.78	8.08	8.06	11	2.71	7.21	6.08	4.89	3.32	2.39	-0.826065	5.15446e-39	0.526453	8.84617e-26	-0.223573	4.34276e-05	-1.35252	1.68094e-121	-0.750026	1.55151e-46	-0.602491	4.45189e-20
CL6035.Contig7_All	1.12	0.47	0.69	1.4	0.94	0.78	1.53	1.66	2.29	0.89	1.84	1.67	0.950867	7.7659e-15	0.453278	0.00031759	1.2669	3.55655e-27	0.49759	3.16043e-06	0.813626	4.82094e-14	-0.316037	0.000530167
CL7858.Contig2_All	34.22	33.84	44.1	24.42	17.71	18.46	15.58	25.23	30.02	22.77	24.71	19.76	-0.731082	3.45111e-148	-0.884403	9.47109e-204	-0.651291	4.14397e-120	0.153322	7.75127e-07	0.233112	5.73586e-13	-0.0797906	0.0038157
Unigene33176_All	1.3	0.79	0.49	1.47	1.43	1.49	1.25	1.49	0.92	0.53	0.52	0.52	-0.710219	1.29966e-10	0.770309	7.62625e-19	0.509363	1.39529e-08	-1.48053	1.50519e-51	-0.260947	0.000447989	-1.21958	2.36266e-32
CL3782.Contig1_All	10.15	11.4	11.35	11.72	13.18	11.47	6.71	12.01	12.47	5.69	9.87	8.45	-0.452911	2.31629e-77	0.144839	2.75917e-11	-0.0713012	0.000750435	-0.59775	2.2292e-140	-0.216141	3.07315e-22	-0.38161	6.50837e-54
CL6766.Contig10_All	0.23	0.1	0.1	0.24	0.28	0.21	0.19	0.28	0.36	0.14	0.4	0.28	0.914196	0.000440486	0.752197	0.00364883	0.939416	0.00039609	0.161999	0.0832517	0.18722	0.122197	-0.0252207	0.215639
Unigene10942_All	17.07	20.15	7.12	18.87	14.32	18.44	15.68	19.32	10.06	6.76	13.89	9.44	-0.553031	2.0616e-42	0.222998	2.07623e-10	0.0351669	0.100603	-0.77603	2.61518e-88	-0.187832	6.09681e-08	-0.588198	4.81875e-48
CL17068.Contig8_All	2	2.62	3.77	2.41	3.16	3.78	1.66	1.71	2.06	0.94	1.81	1.3	-1.04573	1.49125e-32	0.156228	0.00987415	-0.623339	2.54421e-14	-1.20196	6.68507e-45	-0.779566	2.07751e-22	-0.422393	7.45291e-06
CL10780.Contig6_All	3.46	2.44	3.17	3.19	2.58	2.62	1.53	2.29	3.06	1.19	2.31	2.07	-0.702669	3.82235e-50	-0.109623	0.00367813	-0.391879	2.12887e-18	-0.593046	2.85508e-35	-0.282256	4.37697e-10	-0.31079	4.36759e-10
CL5425.Contig10_All	0.83	1.52	1.12	0.58	0.62	0.57	0.17	0.53	0.58	0.86	1.01	0.8	-0.3744	0.000103713	-0.972694	1.73795e-17	-1.43355	1.08612e-30	0.598293	2.45428e-07	-0.460861	0.000703369	1.05915	8.502e-16
CL9967.Contig1_All	1.38	2.08	1.58	2.81	3.28	2.59	1.23	2.14	2.13	0.74	1.57	1.39	-0.445955	4.30045e-06	0.78411	1.02518e-21	0.132669	0.047725	-1.23007	2.52915e-44	-0.651441	4.00363e-16	-0.578624	2.75053e-09
Unigene33919_All	0.09	0.25	0.26	0.67	0.48	0.41	0.26	0.25	0.42	0.12	0.3	0.17	-0.0525977	0.19834	1.36548	5.70803e-08	0.618495	0.0122511	-1.41808	1.13884e-08	-0.746983	0.000503486	-0.671093	0.00720981
CL15328.Contig2_All	2.53	1.82	2.97	1.26	1.41	1.98	5.14	1.28	3.39	9.07	12.43	14.88	2.32148	2.74287e-271	-0.653532	2.10191e-09	0.42501	1.98456e-06	2.97501	0	1.07854	1.38747e-25	1.89646	2.63307e-209
CL373.Contig8_All	4.04	2.16	3.24	3.16	4.06	5.29	0.73	3.27	2.29	0.75	1.91	1.21	-1.28133	1.06658e-51	0.408686	6.85379e-11	-0.571895	2.09222e-14	-1.69002	5.88281e-102	-0.980581	2.65842e-44	-0.709437	2.32054e-14
Unigene15474_All	28.09	31.37	27.11	42.71	36.38	38.46	27.88	42.2	46.43	17.8	30.52	24.81	-0.234936	6.10463e-15	0.445027	1.42206e-60	0.440811	3.35459e-59	-0.679963	2.4204e-129	-0.0042152	0.214321	-0.675747	8.66825e-127
CL6072.Contig7_All	1.27	0.75	1.25	0.5	0.59	0.99	0.15	0.57	0.55	0.26	0.27	0.33	-1.91165	2.17852e-50	-0.645282	2.3243e-10	-1.35055	5.82782e-31	-1.26637	3.37972e-19	-0.705266	3.67421e-08	-0.561106	0.000203758
CL16584.Contig3_All	5.02	2.68	1.79	3.66	6.75	6.6	1.03	3.3	3.53	1.1	0.86	1.44	-1.47422	6.66094e-62	0.842043	2.94863e-45	-0.260579	0.000137611	-2.31626	1.73138e-200	-1.10262	1.73252e-69	-1.21364	7.16117e-39
CL6890.Contig1_All	3.73	3.99	3.97	3.27	5.52	6.25	3.58	4.18	4.17	1.47	4.71	4.51	-0.119493	0.0458092	0.364902	3.16336e-06	0.0418508	0.173464	-0.484395	1.19992e-09	-0.323051	2.78586e-05	-0.161344	0.0191473
Unigene49854_All	2.94	6.32	2.35	9.41	8.33	7.67	5.17	4.81	5.27	3.44	3.26	4.95	0.0126231	0.194276	1.13295	9.64698e-91	0.4007	1.98496e-10	-1.12033	5.25108e-90	-0.732248	2.86414e-44	-0.388077	5.01269e-10
CL4687.Contig7_All	2.95	3.91	4.52	2.3	1.07	1.02	3.04	1.82	2.19	5.69	14.59	12.58	1.53807	9.97595e-166	-1.36934	6.04091e-49	-0.683781	1.07944e-16	2.90741	0	0.685561	4.16896e-11	2.22185	1.21369e-270
CL7796.Contig6_All	0.42	0.57	0.29	0.32	0.71	0.28	0.21	0.39	0.36	0.35	0.72	0.5	0.303616	0.0315549	0.0390608	0.210051	-0.386881	0.0258068	0.264556	0.029027	-0.425942	0.016256	0.690497	0.000317721
CL7540.Contig4_All	7.14	6.85	7.82	6.92	8.86	7.46	4.32	5.67	5.62	3.81	5.06	5.38	-0.606129	1.26519e-24	0.0938644	0.0236236	-0.472044	3.97567e-16	-0.699993	1.83955e-33	-0.565908	5.20923e-23	-0.134085	0.0115411
CL10012.Contig10_All	0.24	0.18	0.15	0.1	0.05	0.18	0.04	0.12	0.16	0.08	0.13	0.05	-1.13808	1.99799e-06	-0.754097	0.000494702	-0.800851	0.000294359	-0.383988	0.0302594	-0.046754	0.213245	-0.337234	0.0647437
CL14793.Contig1_All	5.76	7.6	7.7	12.83	12.71	12.28	17.2	14.38	18.98	5.35	6.15	7.96	-0.102427	0.0340448	0.848249	4.26482e-50	1.27477	7.63085e-128	-0.950675	4.81331e-61	0.426526	9.99312e-21	-1.3772	1.61743e-144
Unigene32069_All	1.45	1.22	1.08	1.13	1.38	1.64	0.59	1.12	0.98	0.48	0.59	0.36	-1.39387	5.52351e-68	0.145161	0.00627944	-0.466204	6.16859e-12	-1.53903	6.87357e-87	-0.611365	4.46736e-20	-0.927662	1.08847e-26
CL10481.Contig5_All	24.97	25.52	24.37	32.41	26.84	19.6	28.61	30.24	22.56	23.67	41.11	33.21	0.399972	3.98402e-31	0.0803573	0.00944504	0.136901	7.35198e-05	0.319615	2.31856e-21	0.0565434	0.0350412	0.263071	4.38907e-15
CL1323.Contig3_All	1	0.96	1.2	1.62	1.32	1.34	0.84	0.87	1.05	0.69	1.56	0.83	-0.0335271	0.171458	0.440806	1.18261e-06	-0.190689	0.0229139	-0.474333	1.10313e-07	-0.631495	4.44974e-11	0.157162	0.0377894
Unigene15644_All	1.94	1.79	0.52	0.45	0.53	0.43	0.31	0.42	0.55	1.18	1.99	3.92	0.752616	8.63584e-08	-1.59328	1.68203e-13	-1.71363	1.00886e-14	2.34589	3.59897e-35	-0.120347	0.174567	2.46624	1.0918e-36
CL97.Contig13_All	1.63	5.25	3.44	9.44	9.06	5.88	11.15	6.01	6.6	3.48	7.3	8.56	0.918648	1.58541e-29	1.24474	3.24057e-58	1.21325	1.18847e-54	-0.326091	1.82201e-07	-0.0314927	0.159989	-0.294598	3.74169e-06
CL6386.Contig3_All	0.91	0.41	0.89	1.13	0.8	0.85	0.74	0.61	1.16	0.44	0.52	0.54	-0.557572	1.13387e-06	0.330627	0.000482249	0.185294	0.0259148	-0.888199	8.23394e-16	-0.145334	0.0430623	-0.742866	6.45417e-11
Unigene19209_All	4.33	2.29	3.17	2.03	1.92	2.14	1.13	1.36	2.05	1.82	2.7	2.35	-0.505509	1.32611e-13	-0.682401	9.48181e-22	-1.09967	2.11069e-46	0.176892	0.00432145	-0.417272	7.21179e-07	0.594164	7.22331e-13
CL5056.Contig1_All	4.44	5.68	5.04	7.36	6.31	4.8	6.82	7.51	6.02	3.1	5.87	6.97	0.0800195	0.0447287	0.288412	1.55215e-07	0.434147	2.1047e-15	-0.208392	3.81172e-05	0.145735	0.00201385	-0.354127	3.27098e-11
CL8578.Contig6_All	1.05	1.27	0.82	1.68	1.41	1.01	1.57	1.65	1.21	0.98	1.62	1.56	0.408338	1.62927e-08	0.385681	1.20253e-07	0.498996	6.2465e-12	0.0226577	0.11637	0.113315	0.0304073	-0.0906571	0.0503944
CL5275.Contig4_All	0.99	0.61	0.95	0.8	1.33	0.91	0.54	0.81	0.69	0.11	0.21	0.25	-2.16538	6.65577e-40	0.256952	0.00602863	-0.303386	0.00412747	-2.42234	3.82362e-54	-0.560338	4.67635e-07	-1.862	4.58056e-27
CL15107.Contig2_All	0.17	0.49	0.41	0.24	0.2	0.15	0.27	0.35	0.35	0.22	0.28	0.39	-0.260551	0.0568787	-0.839975	0.000146761	-0.116796	0.160558	0.579424	0.00348489	0.723179	0.00102133	-0.143754	0.12819
CL2822.Contig21_All	0	0	0	0.49	0.54	0.33	0.1	0.1	0.11	0	0	0			4.66104	0.000127376			-4.67474	6.47573e-05	-2.0496	0.00453399
CL16958.Contig3_All	0.9	0.7	0.37	0.48	1.71	1.61	0.41	1.04	0.87	0.18	0.42	0.38	-0.997599	8.72979e-10	0.954839	5.80328e-16	0.2514	0.0206565	-1.95244	3.46343e-44	-0.703438	3.81752e-10	-1.249	2.62631e-15
CL518.Contig1_All	3.03	2.93	1.78	3.52	1.82	2.93	1.43	2.12	2.19	1.79	3.08	1.89	-0.192031	0.00130747	0.098228	0.037253	-0.421694	8.68583e-10	-0.290259	2.3313e-06	-0.519922	2.43155e-14	0.229663	0.000507815
Unigene37145_All	8.35	4.8	7.35	6.01	7.43	9.05	2.49	6.32	5.85	2.43	4.39	3.8	-0.943574	3.3941e-67	0.135461	0.001072	-0.473168	5.41048e-21	-1.07903	1.17021e-91	-0.608629	5.7167e-35	-0.470406	1.30116e-15
CL10828.Contig3_All	3.74	2.78	1.26	3.07	5	5.56	2.51	6.22	4.37	1.16	1.4	1.18	-1.04184	1.90586e-12	0.813125	5.66635e-14	0.773221	1.30874e-12	-1.85496	2.05685e-46	-0.0399034	0.173215	-1.81506	1.86133e-43
CL16660.Contig7_All	5.45	8.17	5.12	5.86	6.37	6.79	3.27	6	5.63	3.27	6.97	6.14	-0.187429	0.000723732	0.0238839	0.175187	-0.318789	2.01592e-07	-0.211313	0.000112689	-0.342673	2.35609e-08	0.13136	0.0127842
CL7808.Contig2_All	9.49	5.8	6.28	17.09	18.28	11.47	9.84	11.98	17.23	4.16	5.64	5.79	-0.453713	1.37719e-08	1.12456	2.24931e-72	0.872787	1.17777e-40	-1.57827	1.29693e-121	-0.25177	1.43553e-06	-1.3265	7.19015e-79
CL1894.Contig1_All	0.52	0.44	0.4	0.85	0.66	1.27	0.24	0.79	0.44	0.18	0.14	0.11	-1.65369	1.21449e-09	1.03475	1.75933e-09	0.123793	0.154447	-2.68844	1.89636e-31	-0.910957	5.68017e-08	-1.77748	3.56913e-11
Unigene39981_All	4.08	7.87	4.68	5.03	5.34	3.35	6.6	4.21	4.4	3.47	9.59	11.18	0.556136	4.84052e-18	-0.27333	0.000109965	-0.11829	0.0343405	0.829466	8.59877e-35	0.155041	0.0140565	0.674425	1.55292e-24
CL6383.Contig2_All	9.66	8.25	8.59	8.93	11.58	12.85	5.6	8.22	6.82	4.14	6.63	6.74	-0.588676	5.57346e-26	0.334704	1.71069e-12	-0.347702	7.23447e-11	-0.92338	1.26817e-68	-0.682406	7.74866e-41	-0.240974	2.1499e-05
Unigene843_All	0.76	0.64	0.49	0.68	0.69	1.01	0.26	0.95	0.8	0.26	0.51	0.29	-0.842588	1.11196e-08	0.329146	0.00281615	0.0926205	0.135817	-1.17173	7.14518e-17	-0.236525	0.016885	-0.935208	1.80259e-10
Unigene18999_All	14.76	23.82	10.23	9.74	3.08	8.58	17.85	14.72	14.62	12.79	9.08	5.27	-0.842266	7.28916e-99	-1.18562	1.71855e-171	-0.0410611	0.07356	0.343351	7.55048e-13	1.14456	6.76906e-157	-0.801205	5.25953e-88
CL351.Contig1_All	5.13	5.36	3.15	6.35	7.69	9.32	2.05	4.36	4.64	1.02	1.53	1.57	-1.72516	2.67856e-194	0.77712	3.47371e-94	-0.294539	5.96541e-11	-2.50228	0	-1.07166	1.13662e-159	-1.43062	8.14575e-121
CL7245.Contig7_All	17.35	17.67	8.52	8.41	11.82	10.48	5.94	8.44	10.28	5.38	8.86	9.57	-0.8635	1.78998e-103	-0.501583	1.85644e-40	-0.811218	2.71483e-92	-0.361917	3.52481e-17	-0.309636	6.8018e-13	-0.0522813	0.0690664
CL8683.Contig19_All	10.97	14.97	6.92	2.96	2.26	3.59	12.76	16.09	5.32	1.95	2.25	1.08	-2.63365	0	-1.89597	0	0.0659758	0.0183731	-0.737682	6.13788e-23	1.96194	0	-2.69962	0
CL9339.Contig3_All	0.93	0.46	0.66	0.72	0.43	0.69	0.52	0.79	0.63	0.69	1.08	0.64	0.240401	0.0204093	-0.154553	0.0803442	-0.0685535	0.174409	0.394955	0.000853449	0.0859997	0.146683	0.308955	0.00728072
CL9509.Contig3_All	0.47	0.51	0.6	1.5	0.93	0.37	1.39	0.87	1.27	0.12	0.06	0.12	-2.41491	7.88452e-11	0.828749	5.29522e-05	1.17073	5.17754e-09	-3.24366	1.26118e-23	0.34198	0.0169836	-3.58564	3.03103e-31
CL5845.Contig7_All	0.68	1.97	1.26	1.98	1.68	1.46	2.46	2.57	2.49	0.96	1.81	1.18	0.0187372	0.192194	0.390565	4.8885e-06	0.949534	4.51945e-32	-0.371828	5.78054e-06	0.558969	8.18892e-14	-0.930796	2.86193e-31
CL15875.Contig2_All	1.04	1.72	1.31	3.23	5.2	2.24	3.58	7.62	6.77	0.27	0.09	0.39	-2.43482	1.85982e-23	1.39738	1.91391e-28	2.16109	1.83599e-84	-3.8322	1.04165e-88	0.763713	1.47498e-18	-4.59592	1.93643e-163
Unigene53984_All	1.3	0.74	1.05	2.18	1.41	1.59	1.1	1.64	1.42	0.46	0.93	1	-0.364535	0.00109827	0.748261	2.07065e-13	0.436665	2.68336e-05	-1.1128	7.35488e-25	-0.311596	0.000441933	-0.8012	2.15021e-12
Unigene61834_All	0.77	0.31	0.39	0.92	1.14	0.39	1.43	0.82	1.22	0.46	0.97	1.1	0.825837	0.0120267	0.75433	0.0212355	1.28776	0.000266092	0.0715063	0.130198	0.533431	0.0326828	-0.461924	0.0434338
Unigene51142_All	0.77	0.32	0.45	0.38	0.13	0.32	0.32	0.63	0.64	0.13	0.5	0.31	-0.691771	0.0377474	-0.882265	0.0220733	0.0710202	0.228988	0.190494	0.114033	0.953285	0.0155778	-0.762791	0.0289042
CL7653.Contig21_All	15.6	23.03	25.81	16.07	13.5	12.85	20.45	18.91	25.23	30.29	49.69	66.75	1.19836	0	-0.599178	9.25296e-52	0.0139694	0.189921	1.79754	0	0.613148	4.42551e-54	1.18439	0
CL474.Contig3_All	0.49	0.32	0.25	0.37	0.71	0.38	0.4	0.15	0.4	0.26	0.73	0.88	0.825647	2.91863e-05	0.451084	0.0141644	-0.158452	0.149023	0.374564	0.00951188	-0.609536	0.00296273	0.9841	2.06324e-06
Unigene11902_All	8.33	6	3.68	7.69	5.92	5.5	2.5	5.51	5.49	3.13	3.98	3.86	-0.708586	1.36578e-33	0.0890216	0.025888	-0.405164	3.1236e-13	-0.797607	1.43753e-43	-0.494186	2.71661e-19	-0.303421	6.9577e-07
CL652.Contig14_All	32.63	61.71	27.6	107.99	99.92	63.68	93.84	158.42	130.85	9.42	5.31	10.41	-2.27151	0	1.15809	0	1.66164	0	-3.4296	0	0.50355	0	-3.93315	0
CL7501.Contig5_All	0.88	0.6	0.22	1.92	2.43	1.42	2.09	1.65	1.19	0.57	2.44	1.91	1.55546	4.52751e-12	1.77042	6.17757e-16	1.55814	6.19934e-12	-0.214964	0.0341401	-0.212282	0.0604131	-0.00268128	0.228556
CL16909.Contig7_All	0.63	0.79	0.62	1.06	0.95	0.89	0.36	0.79	0.84	0.52	0.57	0.48	-0.373976	0.000396594	0.511216	1.22462e-07	-0.0231663	0.221446	-0.885192	1.40162e-17	-0.534382	4.33481e-08	-0.35081	0.000859359
CL13348.Contig1_All	0.38	0.31	0.21	0.65	0.28	0.42	0.35	0.41	0.42	0.1	0.37	0.23	-0.321821	0.109507	0.58722	0.0322712	0.39915	0.0869436	-0.909041	0.00334817	-0.188071	0.151419	-0.720971	0.0201249
Unigene30194_All	2.8	2.07	1.59	3.04	2.87	2.69	1.45	1.73	1.79	1.1	1.88	1.16	-0.633584	1.35977e-13	0.417577	4.32565e-09	-0.370776	3.9755e-06	-1.05116	2.60934e-39	-0.788352	1.87667e-24	-0.262808	0.00154285
CL12331.Contig1_All	0.24	0.06	0.21	0.66	1.13	0.87	1.05	1.03	0.66	0.06	0.12	0.09	-0.93975	0.0113639	2.36689	3.28542e-20	2.42499	1.93012e-21	-3.30664	3.21709e-28	0.0580953	0.185316	-3.36474	2.8921e-29
CL4358.Contig2_All	3.74	2.49	4.81	6.53	5.13	3.82	8.36	5.42	5.86	1.33	3.35	3.88	-0.357713	2.30236e-06	0.491745	3.63054e-13	0.837442	1.03523e-38	-0.849458	3.33998e-32	0.345697	2.88504e-09	-1.19516	1.52856e-68
Unigene15868_All	3.46	4.83	2.62	4.33	5.86	4.61	2.12	6.13	5.03	1.01	1.39	1.43	-1.49722	2.64441e-39	0.443809	3.13214e-08	0.301785	0.000144786	-1.94102	1.89398e-75	-0.142024	0.0216433	-1.799	1.55841e-61
CL383.Contig13_All	2.29	1.84	2.48	5.61	4.25	2.49	7.57	3.44	5.54	2.2	4.24	4.19	0.694348	1.03495e-14	0.906028	3.91981e-25	1.33005	9.1909e-60	-0.21168	0.0012623	0.424026	7.06881e-10	-0.635706	8.16559e-19
CL1396.Contig3_All	2.64	1.3	1.51	1.48	0.76	1.2	1.04	0.8	2.33	0.44	1.02	1.04	-1.12149	5.21932e-47	-0.659048	5.03282e-20	-0.386404	1.16206e-08	-0.46244	3.17004e-08	0.272644	0.00017718	-0.735083	9.05273e-19
Unigene23204_All	41.85	44.46	52.56	24.98	43.92	31.2	20.85	41.27	33.01	20.48	24.68	33.05	-0.81927	7.71063e-231	-0.470169	2.18727e-86	-0.532236	1.48146e-107	-0.349101	1.69942e-37	-0.0620674	0.00624975	-0.287034	3.76713e-25
CL8847.Contig7_All	3.7	1.97	3.68	2.96	3.61	3.43	1.03	3.17	2.87	0.77	2.64	1.8	-0.837598	1.27429e-22	0.100171	0.050592	-0.38879	5.81157e-07	-0.93777	4.79189e-29	-0.488961	2.87708e-10	-0.448809	4.96291e-07
CL11446.Contig2_All	1.21	0.64	0.8	0.67	0.9	1.34	0.5	0.34	0.72	0.25	0.77	0.54	-0.754355	2.49916e-07	0.135978	0.083209	-0.760559	2.84925e-07	-0.890333	4.36354e-10	-0.896537	8.85677e-10	0.00620405	0.226763
CL13136.Contig5_All	0.39	0.61	0.19	1.02	1.43	0.72	0.75	0.5	0.97	0.18	0.23	0.13	-1.13545	5.69059e-07	1.42485	3.46057e-21	0.911558	2.03326e-08	-2.5603	1.46322e-44	-0.513296	3.26948e-05	-2.047	1.81901e-24
CL1441.Contig11_All	4.01	7.2	5.97	9.51	6.8	5.98	8.05	7.77	8.21	5.11	8.64	5.69	0.182403	0.000148939	0.378812	2.61527e-14	0.490934	1.60062e-23	-0.196408	1.14979e-05	0.112123	0.0052928	-0.308531	4.70013e-11
CL5650.Contig2_All	3.46	1.71	2.63	1.05	4.34	3.63	0.55	1.43	1.46	0.7	1.18	0.48	-1.70486	5.65732e-15	0.217987	0.0497615	-1.15547	5.28919e-09	-1.92285	4.36919e-20	-1.37346	9.17231e-13	-0.549387	0.0125878
Unigene60255_All	2.78	4.57	2.09	8.32	6.68	3	10.19	7.73	7.89	4.48	8.06	8.91	1.19294	1.29201e-65	0.936231	1.58564e-37	1.45956	1.66909e-105	0.25671	3.59477e-06	0.523332	3.06718e-20	-0.266622	4.05758e-07
CL9210.Contig2_All	2.32	1.46	1.88	1.38	2.06	2.15	0.44	1.27	1.17	0.35	0.63	0.86	-1.6096	3.31341e-24	-0.0135989	0.223638	-0.961597	1.07934e-11	-1.596	5.44195e-24	-0.947998	2.34069e-11	-0.648004	0.000217914
CL9303.Contig2_All	2.7	2.25	1.72	1.71	3.05	2.39	1.54	1.66	2.18	1.15	2.14	1.74	-0.399194	8.09897e-05	0.103056	0.0844963	-0.298067	0.00203426	-0.502251	5.57883e-07	-0.401123	5.73341e-05	-0.101127	0.0975021
Unigene46079_All	0.51	0.68	0.33	0.85	0.79	1.07	0.57	1	0.53	0.16	0.17	0.33	-1.21285	3.3193e-09	0.828052	1.0712e-08	0.475954	0.000989591	-2.0409	9.84008e-30	-0.352098	0.00351047	-1.6888	1.62774e-18
CL222.Contig92_All	14.95	18.85	14.39	10.86	3.09	14.11	6.16	14.65	10.29	10.59	28.88	22.62	0.368517	4.82219e-63	-0.777512	8.31277e-184	-0.621706	3.34981e-124	1.14603	0	0.155805	1.12123e-07	0.990223	0
CL16584.Contig2_All	2.9	5.42	3.6	5.81	3.91	3.91	1.88	4.5	5.29	2.15	6.19	3.4	-0.017611	0.178627	0.196791	0.000401431	-0.0208362	0.199748	-0.214402	7.55529e-05	-0.217627	0.000127572	0.00322525	0.224319
CL16361.Contig3_All	2.26	3.12	2.01	5.55	4.4	4.57	5.05	3.92	3.48	2.12	4.33	4.72	0.604252	2.90165e-17	0.977463	3.20747e-47	0.759644	3.50758e-27	-0.373211	2.35545e-10	-0.217819	0.00010752	-0.155392	0.00453956
Unigene42643_All	0.31	0.38	0.24	0.75	0.78	0.78	0.52	0.65	0.9	0.19	0.28	0.32	-0.211638	0.128399	1.33157	1.57955e-07	1.18616	4.45654e-06	-1.5432	2.69647e-09	-0.14541	0.131879	-1.39779	1.99513e-07
CL16239.Contig9_All	5.13	10.83	4.98	11.95	14.07	13.54	10.14	10.25	14.48	4.48	7.04	7.85	-0.104375	0.0181459	0.919983	1.26027e-83	0.744157	5.05851e-52	-1.02436	1.48435e-100	-0.175826	1.21235e-05	-0.848533	4.05674e-65
Unigene23800_All	0.24	0.35	0.22	0.57	0.62	0.81	0.24	0.48	0.32	0.08	0.03	0.12	-1.86632	6.86188e-05	1.30166	3.19881e-06	0.385164	0.0783169	-3.16798	6.14383e-16	-0.916498	0.000298591	-2.25148	6.7518e-07
CL16075.Contig4_All	52.4	49.97	45.51	78.03	76.59	71.2	70.4	61.8	67.3	33.87	56.92	56.38	0.00678552	0.184802	0.615958	1.59641e-134	0.447407	1.24441e-67	-0.609173	5.49022e-133	-0.168551	2.22368e-13	-0.440622	3.7436e-66
CL10517.Contig2_All	22.72	21.12	14.97	20.6	21.15	18.61	10.53	18.51	22.21	10.93	19.77	18.65	-0.247052	1.75407e-16	0.0403033	0.0481954	-0.188723	2.05336e-10	-0.287355	3.71472e-22	-0.229026	1.22196e-14	-0.0583289	0.0184004
CL8578.Contig3_All	8.72	8.17	7.58	10.27	7.78	7.06	6.79	7.77	9.12	4.76	8.12	7.77	-0.242141	1.34467e-16	0.0399777	0.0465008	-0.0429751	0.0429058	-0.282118	2.21689e-22	-0.0829529	0.0013563	-0.199166	1.26373e-11
CL8459.Contig4_All	1.16	1.34	1.02	1.95	2.12	2.05	0.6	1.6	1.49	0.33	0.74	0.75	-0.950604	1.64301e-16	0.800843	9.94938e-21	0.0813881	0.118162	-1.75145	1.66095e-67	-0.719455	1.97147e-17	-1.03199	1.69789e-19
CL5659.Contig13_All	2.55	2.04	1.86	2.33	2.72	2.73	0.89	1.64	2.16	1.11	2.12	2.17	-0.248509	0.0022472	0.273043	0.000489348	-0.451531	1.29167e-06	-0.521552	8.59127e-10	-0.724573	1.8763e-15	0.203021	0.0127793
CL13760.Contig2_All	1.77	1.07	2.16	0.56	1.11	1.23	0.41	1.01	0.61	0.34	0.68	0.85	-1.41331	8.41602e-18	-0.782013	7.69119e-08	-1.28386	2.06234e-15	-0.631293	0.000187616	-0.501845	0.00260656	-0.129448	0.133859
Unigene49582_All	0.71	0.42	0.31	0.26	0.58	0.45	0.38	0.44	0.13	0.38	0.46	0.35	-0.272804	0.0427084	-0.156531	0.112222	-0.586313	0.00176619	-0.116272	0.0898355	-0.429782	0.013996	0.31351	0.0409828
CL11201.Contig8_All	1.78	1.32	0.9	1.39	1.37	1.06	0.79	2.1	1.82	1.11	0.98	0.97	-0.379133	1.11048e-06	-0.0654686	0.107744	0.245774	0.00031339	-0.313664	2.81041e-05	0.311243	1.1134e-05	-0.624907	4.91404e-16
CL16502.Contig6_All	9.31	4.94	5.94	2.71	9.98	6.82	2.37	4.17	4.23	2.28	2.42	1.24	-1.75779	6.32305e-143	-0.0499323	0.0924492	-0.896654	7.88365e-51	-1.70785	5.4411e-133	-0.846722	1.11954e-44	-0.861131	1.37314e-26
CL9770.Contig1_All	0.4	0.68	0.49	0.64	0.72	0.45	0.8	0.58	0.28	0.29	0.38	0.55	-0.334222	0.111918	0.223132	0.152762	0.12794	0.204634	-0.557354	0.0338519	-0.095192	0.202683	-0.462162	0.0784429
CL10521.Contig2_All	3.26	2.36	1.7	2.72	4.22	4.39	1.4	3.25	3.18	0.23	0.77	0.56	-2.22531	1.6656e-124	0.631861	2.69407e-28	0.107051	0.029331	-2.85717	8.56973e-254	-0.524811	1.11371e-20	-2.33236	4.35599e-141
CL5356.Contig2_All	0.43	0.2	0.27	0.35	0.27	0.63	0.11	0.24	0.41	0.09	0.12	0.17	-1.25406	3.46407e-10	0.470247	0.000734119	-0.234606	0.0537646	-1.7243	1.33406e-20	-0.704853	3.90272e-06	-1.01945	7.03146e-07
CL9007.Contig9_All	2.15	2.86	2.49	4.41	3.94	2.7	4.72	4.11	3.89	1.91	3.77	3.9	0.372847	0.00172275	0.568324	5.48221e-06	0.782494	2.48181e-10	-0.195477	0.0188285	0.21417	0.0189546	-0.409647	0.000176287
CL3206.Contig26_All	0	0	0	0	0	0	0	0	0	0.23	0.13	0.09	6.68508	8.90425e-14					6.68282	5.05264e-14			6.67295	1.05726e-13
CL11925.Contig1_All	11.6	16.65	11.06	21.3	23.4	21.12	16.84	21.25	17.87	8.43	13.51	14.32	-0.102338	0.0170522	0.748751	1.39171e-56	0.526965	7.0756e-27	-0.85109	7.26829e-71	-0.221786	1.48047e-07	-0.629304	1.64877e-36
CL10683.Contig3_All	2.12	1.68	1.78	1.83	2.63	2.55	1.24	2.16	1.41	0.71	1.29	1.11	-0.839166	1.65457e-27	0.328635	1.13163e-07	-0.207843	0.00115708	-1.1678	1.08723e-57	-0.536478	2.92192e-16	-0.631323	2.61327e-15
CL10578.Contig2_All	0.73	0.92	0.4	0.84	1.19	0.71	0.52	0.58	0.94	0.63	0.65	0.59	-0.130034	0.118794	0.424213	0.00466769	0.00567516	0.254949	-0.554248	0.000320431	-0.418538	0.00517829	-0.13571	0.119755
Unigene527_All	9.44	6.73	7.23	4.42	6.77	7.84	1.52	3.88	4	2.77	5.4	2.9	-1.07654	7.03826e-101	-0.297477	1.08551e-11	-1.30596	3.51732e-135	-0.779061	6.02692e-49	-1.00848	2.26258e-73	0.229422	0.000114708
CL1759.Contig10_All	4.47	1.95	2.65	2.03	1.68	3.75	0.71	2.07	2.36	0.92	1.81	0.78	-1.36728	3.30781e-119	-0.280155	5.66484e-09	-0.808848	3.41242e-51	-1.08713	1.80049e-69	-0.528693	6.08824e-21	-0.558433	1.28218e-16
CL12459.Contig2_All	0	0	0	0.18	0.26	0.09	0	0	0	0	0	0			3.58722	0.00718911			-3.60092	0.00390219	-3.57509	0.00738075
CL7943.Contig2_All	1.62	2.16	1.02	8.07	7.28	4.95	0.85	2.17	1.31	0.61	0.5	1.11	-1.09911	3.59907e-16	2.08622	9.94298e-156	-0.129948	0.0793096	-3.18532	1.12018e-248	-2.21616	5.15704e-167	-0.96916	1.96783e-12
CL2929.Contig3_All	2.34	1.11	1.3	1.4	1.83	3.42	1.84	1.06	1.5	0.7	1.34	0.9	-0.692486	1.84578e-15	0.484512	9.45914e-12	-0.112521	0.0503838	-1.177	1.99586e-48	-0.597034	3.15471e-16	-0.579964	5.61218e-11
CL8794.Contig13_All	0.64	1.03	1.1	0.67	0.58	0.54	0.37	0.69	0.71	0.63	0.17	0.77	-0.811601	4.86996e-10	-0.633281	4.69922e-07	-0.6437	3.57723e-07	-0.17832	0.0389249	-0.0104183	0.230704	-0.167902	0.0696467
CL14121.Contig3_All	3.22	2.42	4.95	0.89	0.45	0.67	0.09	0.26	0.34	4.16	7.05	8.37	0.899887	2.76186e-29	-2.39159	3.31427e-63	-3.91937	1.29177e-98	3.29147	6.21692e-162	-1.52779	3.13245e-08	4.81926	7.77938e-203
Unigene14034_All	1.47	2.23	1.13	1.22	1.26	1.7	0.7	0.62	1.05	0.96	1.13	0.68	-0.795682	1.46102e-30	-0.2002	0.000560894	-1.02112	4.78185e-45	-0.595482	3.81549e-17	-0.820915	7.69324e-28	0.225434	0.0022226
Unigene965_All	0.79	0.84	1.12	0.52	0.88	1.1	0.25	0.88	0.48	0.25	0.62	0.55	-0.947182	3.5201e-09	-0.132929	0.0973213	-0.752712	1.14685e-06	-0.814252	3.04634e-07	-0.619782	6.27385e-05	-0.19447	0.0793904
CL15310.Contig7_All	1.64	2.7	1.79	3.5	2.1	1.49	4.55	2.17	2.69	2.33	4.41	6	1.077	3.03658e-16	0.21813	0.0471422	0.637618	4.65828e-06	0.858874	5.60965e-12	0.419488	0.000971775	0.439386	8.79137e-05
CL11360.Contig1_All	2.36	2.11	2.51	4.24	6.7	4.82	1.46	4.62	5.44	0.54	1.18	0.71	-1.51883	1.48291e-29	1.17859	6.00025e-44	0.738824	5.25905e-16	-2.69742	2.92816e-133	-0.43977	2.29467e-09	-2.25765	2.18654e-80
CL4935.Contig4_All	0.45	0.51	0.24	0.47	0.43	0.45	0.82	0.46	0.82	0.2	0.3	0.27	-0.611275	0.0135855	0.161006	0.14565	0.811174	0.000347778	-0.772281	0.00199844	0.650168	0.00217416	-1.42245	5.76262e-08
CL4306.Contig2_All	1.22	1.91	3.11	5.21	2.51	1.88	6.37	2.31	2.96	2.2	6.09	6	1.20888	2.62994e-30	0.62821	4.63831e-08	0.909648	3.41104e-16	0.580669	2.75547e-10	0.281437	0.00192362	0.299232	0.000353052
CL16428.Contig26_All	3.15	5.76	3.66	9.3	3.98	4.89	26.35	9.05	19.82	5.11	11.04	15.92	1.36109	7.48147e-128	0.536538	1.79115e-16	2.1386	0	0.82455	7.5293e-58	1.60206	2.81391e-274	-0.777508	9.54899e-88
CL6669.Contig11_All	2.22	1.59	2.34	3.3	2.88	2.54	6.11	3.03	2.84	2.68	1.46	5.16	0.606701	4.44231e-11	0.505704	6.117e-08	0.966267	6.34189e-28	0.100997	0.0404459	0.460564	7.10397e-09	-0.359566	2.48311e-06
CL3837.Contig6_All	1.29	1.82	1.37	2.37	3.73	1.97	2.09	2.08	2.24	0.86	1.49	1.44	-0.233526	0.0213159	0.850693	5.86091e-15	0.526516	2.89707e-06	-1.08422	6.09699e-22	-0.324177	0.000494743	-0.760043	1.59907e-10
CL8337.Contig4_All	5.78	3.89	2.6	7.86	11.86	5.01	4.31	3.96	5.64	3.41	6.88	3.02	0.124625	0.0318015	1.01497	9.22574e-50	0.191409	0.00569847	-0.890348	6.18943e-41	-0.823565	2.24593e-35	-0.0667834	0.100237
CL14646.Contig1_All	1.44	0.81	1.36	0.75	0.51	0.47	0.25	0.46	0.64	0.8	0.87	1.43	-0.194271	0.0981259	-1.05558	3.28799e-05	-1.39726	4.22524e-07	0.861304	0.000364867	-0.341689	0.0881979	1.20299	1.57779e-05
CL1083.Contig27_All	5	2.07	5.36	1.21	1.95	2.42	0.91	1.48	0.71	0.84	0.71	0.33	-2.72219	0	-1.15232	1.74962e-139	-1.98918	0	-1.56987	3.54038e-102	-0.83686	4.65477e-38	-0.733009	3.84147e-18
CL782.Contig11_All	79.13	38.59	93.62	58.61	18.24	43.94	31.98	80.96	62.24	73.21	58.12	44.44	-0.263919	1.67503e-151	-0.803455	0	-0.261615	1.20516e-147	0.539535	0	0.54184	0	-0.00230454	0.196657
Unigene53951_All	1.99	3.12	2.1	4.77	3.32	2.51	3.08	2.99	3.48	1.2	3.36	2.34	-0.0549534	0.143248	0.561377	2.30815e-09	0.416432	1.04366e-05	-0.616331	4.19158e-11	-0.144945	0.0318789	-0.471385	8.11098e-07
Unigene69416_All	0	0	0	0.26	0.25	0.39	0	0	0	0	0	0			3.80961	0.00386494			-3.82331	0.00207349	-3.79749	0.003991
CL14690.Contig3_All	0.22	0.78	0.66	1.66	1.37	1.67	0.57	0.6	1.31	0.17	0.11	0.24	-1.6686	1.00001e-13	1.49525	4.80817e-30	0.577729	8.09257e-05	-3.16385	2.08097e-73	-0.917522	9.55009e-15	-2.24633	6.59941e-28
CL2073.Contig13_All	1.66	1.58	0.67	1.09	0.94	0.83	1.2	2.3	2.49	1.85	1.22	3.36	0.726983	1.45172e-12	-0.450472	0.000176889	0.625593	2.31797e-09	1.17746	4.45519e-26	1.07607	6.94308e-21	0.10139	0.0743074
CL424.Contig2_All	0.7	0.79	0.64	1.62	0.95	1.69	2.16	1.99	1.53	0.66	1.26	1.2	0.569286	0.00101725	1.00841	9.07343e-09	1.4338	4.95312e-18	-0.43912	0.00131205	0.425391	0.000908115	-0.864512	4.39988e-09
Unigene46481_All	1.35	1.09	0.91	1.67	2.14	1.94	1.98	3.81	2.33	0.73	1.19	1.17	-0.105122	0.140018	0.784078	1.34638e-06	1.29818	1.88693e-17	-0.889199	4.38369e-08	0.5141	5.45726e-05	-1.4033	1.44114e-19
CL4041.Contig6_All	0.68	0.54	0.56	1.1	0.84	0.94	0.55	0.82	0.81	0.29	0.3	0.11	-1.37156	1.58389e-09	0.693628	9.09853e-06	0.305355	0.0265615	-2.06519	3.69155e-24	-0.388273	0.00428716	-1.67692	1.68177e-14
Unigene10076_All	8.87	9.2	9.5	8.89	9.85	10.1	9.12	8.99	8.2	5.28	9.21	9.62	-0.188654	4.71648e-07	0.0664367	0.0232337	-0.0615623	0.034527	-0.255091	7.98764e-12	-0.127999	0.000277971	-0.127092	0.000434989
CL3757.Contig1_All	1.17	0.57	0.89	1.89	0.68	1.44	1.78	1.87	1.93	0.95	0.44	0.84	-0.232058	0.0146318	0.611356	1.85219e-09	1.09041	2.31253e-30	-0.843414	1.22771e-15	0.479057	1.28413e-08	-1.32247	8.87759e-41
CL979.Contig46_All	2.48	2.12	4.06	1.55	1.92	3.53	0.86	2.27	1.69	1.07	1.56	1.36	-1.11547	9.57488e-54	-0.307339	5.35205e-07	-0.83442	1.60819e-33	-0.808135	1.18034e-26	-0.52708	3.49995e-13	-0.281055	0.000291277
CL6044.Contig5_All	9.34	5.28	5.93	10.17	18.87	16.52	3.08	6.01	4.62	1.79	4.06	2.11	-1.36281	3.38361e-74	1.15068	2.68902e-124	-0.569879	2.48016e-18	-2.51349	0	-1.72056	1.41801e-225	-0.792934	6.75162e-22
CL3582.Contig4_All	2.69	2.7	2.59	3.76	3.83	3.79	4.11	2.44	3.21	2.54	5.26	4.88	0.683529	2.77141e-09	0.516601	9.28903e-06	0.306364	0.00554245	0.166928	0.0210534	-0.210237	0.0216124	0.377164	0.000269371
CL11340.Contig1_All	0.48	0.51	0.55	1.66	3.57	1.94	0.26	0.53	0.21	0	0	0	-6.659	1.8147e-13	2.23139	6.53703e-30	-0.594033	0.0217335	-8.89038	8.96027e-47	-2.82542	2.92594e-38	-6.06496	1.21482e-09
Unigene10001_All	2.18	2.88	1.28	1.81	3.43	2.34	0.74	1.98	1.45	0.78	0.85	1.03	-1.25058	2.34077e-52	0.256585	2.34022e-05	-0.594925	4.86545e-16	-1.50716	2.96275e-82	-0.85151	1.47509e-33	-0.65565	3.9607e-13
CL4464.Contig8_All	0.77	0.72	0.39	0.66	0.82	1.04	0.17	0.62	0.49	0.07	0.26	0.18	-1.89384	1.3858e-52	0.414967	3.30521e-07	-0.550454	1.41976e-08	-2.3088	3.94184e-89	-0.965421	8.64222e-26	-1.34338	7.12781e-23
CL4521.Contig6_All	0.59	0.63	0.68	0.82	0.8	0.79	0.25	0.48	0.42	0.44	0.8	0.43	-0.190365	0.00758044	0.352345	2.83608e-06	-0.717181	1.48433e-14	-0.542711	3.9822e-12	-1.06953	1.02082e-33	0.526815	2.50064e-08
CL11178.Contig5_All	1.45	3.13	2.47	2.2	4.45	3.8	2.08	4.28	6.37	1.37	0.44	1.57	-1.05599	4.74028e-32	0.566598	5.55736e-17	0.859026	3.41718e-40	-1.62258	1.01958e-88	0.292427	3.24854e-07	-1.91501	9.3623e-135
Unigene51204_All	0.42	0.72	0.47	0.42	0.42	0.47	0.3	0.42	0.21	0.29	0.25	0.25	-1.0137	0.00319048	-0.291473	0.110316	-0.776369	0.0143293	-0.722225	0.0146121	-0.484896	0.0653633	-0.237329	0.148199
CL11820.Contig2_All	0.85	0.83	0.54	1.14	1.17	1.4	0.48	1.13	1.03	0.11	0.26	0.19	-1.97289	5.91764e-28	0.746369	2.38392e-11	0.261842	0.011755	-2.71925	3.2821e-66	-0.484527	3.63818e-06	-2.23473	2.76566e-38
CL10601.Contig2_All	0.8	0.68	0.88	2.45	2.52	2.04	1.17	2.2	1.9	0.25	0.37	0.46	-1.11137	1.19853e-08	1.57732	3.93152e-36	1.17492	2.42747e-18	-2.68869	2.26096e-70	-0.402396	4.01196e-05	-2.28629	1.38862e-44
CL2789.Contig3_All	0.12	0.39	0.28	0.57	0.87	0.34	1.31	1.02	0.63	0.53	0.31	0.41	0.683364	0.00476883	1.19042	2.16433e-06	1.92595	3.00083e-17	-0.507059	0.00516012	0.735522	3.55548e-05	-1.24258	4.7402e-10
CL10446.Contig1_All	59.5	21.35	67.92	43.6	20.82	21.42	28.66	29.3	28.26	28.05	26.63	32.53	-0.766797	0	-0.789564	0	-0.782574	0	0.0227671	0.029042	0.00699003	0.17293	0.0157771	0.0891277
CL10455.Contig1_All	0.32	0.55	0.14	0.5	0.64	0.97	0.23	0.32	0.37	0.09	0.09	0.13	-1.66578	0.00134786	1.06639	0.00124415	-0.125377	0.209307	-2.73216	4.13315e-09	-1.19177	0.000535933	-1.5404	0.00316996
CL6760.Contig3_All	2.26	2.32	2.53	2.99	2.7	3.65	0.96	2.78	3.33	1.3	2.1	1.71	-0.471432	1.04627e-07	0.39502	2.6545e-07	0.0036024	0.252832	-0.866452	1.03687e-24	-0.391417	3.5793e-07	-0.475035	9.41125e-08
CL17076.Contig9_All	0.78	1.01	0.46	0.8	1.44	0.59	0.45	1.2	1.32	1.13	1.36	0.93	0.613356	1.32062e-05	0.336069	0.0102859	0.414184	0.00273176	0.277287	0.00857071	0.0781157	0.154104	0.199171	0.041699
CL3939.Contig32_All	2.4	4.33	1.55	1.29	2	3.57	0.53	1.08	0.99	0.91	0.3	1.18	-1.781	1.55359e-66	-0.272187	0.00026408	-1.65646	1.13157e-59	-1.50881	2.1073e-44	-1.38428	1.64405e-38	-0.124536	0.0955154
CL6646.Contig4_All	0.29	0.2	0.47	0.34	0.23	0.38	0.18	0.13	0.11	0.13	0.11	0.21	-1.03502	0.000631692	0.00947336	0.237082	-1.17987	0.000248043	-1.04449	0.000351932	-1.18934	0.000214179	0.144848	0.174587
CL7668.Contig3_All	5.15	5.41	5.67	6.13	6.77	6.47	5.67	5.96	7.63	3.26	5.84	4.49	-0.250117	9.27709e-06	0.257346	1.05769e-06	0.254518	1.48993e-06	-0.507462	1.05211e-19	-0.00282814	0.233746	-0.504634	3.97598e-19
CL15019.Contig1_All	42.86	22.87	24.8	26.56	51.98	50.1	13	33.19	24.7	7.26	12.22	10.4	-1.5919	0	0.508645	6.40034e-111	-0.338754	8.69607e-38	-2.10055	0	-0.847399	5.63123e-270	-1.25315	7.0916e-287
CL1338.Contig27_All	0.71	0.58	0.57	0.49	0.51	0.48	0.54	0.55	0.72	0.55	1.02	0.6	0.232413	0.0369112	-0.330675	0.0178909	-0.0306999	0.226301	0.563088	0.000147758	0.299975	0.0267064	0.263113	0.0273499
CL2353.Contig53_All	0.8	0.35	0.75	1.1	0.7	1.63	0.77	0.53	0.82	0.16	0.39	0.21	-1.30984	8.57699e-12	0.856991	9.50153e-11	0.164163	0.0843592	-2.16683	1.48098e-38	-0.692828	5.9814e-08	-1.47401	4.48778e-15
Unigene50631_All	2.04	3.94	2.82	3.15	4.97	4.35	4.67	2.65	5.61	2.08	3.46	4.52	0.220767	0.0377643	0.513736	0.000135249	0.581489	1.85521e-05	-0.292969	0.00608665	0.0677529	0.15648	-0.360722	0.00263859
CL2969.Contig8_All	3.59	3.21	2.86	2.27	2.33	2.17	1.09	2.11	1.43	1.04	2.22	1.73	-0.947674	8.60508e-38	-0.51018	7.05376e-14	-1.0495	6.53259e-44	-0.437494	1.56159e-08	-0.539315	3.95567e-11	0.101821	0.0676622
CL5572.Contig1_All	2.21	2.18	1.26	2.76	2.19	2.56	4.41	2.22	2.56	1.24	2.98	3.26	0.411997	8.22084e-07	0.411936	1.02353e-06	0.704151	1.25567e-17	6.08278e-05	0.151773	0.292215	6.52732e-05	-0.292154	5.60907e-05
CL68.Contig25_All	5.57	4.22	4.08	3.02	4.16	5.2	0.51	2.09	1.82	1.94	3.47	2.05	-0.893385	6.09771e-74	-0.163431	7.10747e-05	-1.6391	1.61485e-187	-0.729954	1.23216e-47	-1.47567	9.8499e-144	0.745716	3.30273e-30
CL9001.Contig5_All	1.03	0.38	0.41	0.43	0.16	0.41	0.73	0.24	0.54	0.3	0.57	1.07	0.104243	0.142194	-0.877329	8.42744e-05	-0.26382	0.0663509	0.981572	5.06891e-06	0.613509	0.00467021	0.368063	0.0224562
CL11157.Contig2_All	1.35	0.98	1.95	1.51	0.9	1.39	1.45	0.89	1.19	1.51	1.67	2.02	0.283094	0.000268639	-0.171462	0.0192048	-0.274393	0.00128038	0.454555	4.11238e-08	-0.102932	0.0803081	0.557487	1.52417e-10
CL2017.Contig12_All	4.67	4.25	4.23	8.91	9.76	7.95	7.83	8.47	8.52	2.14	4.78	4.88	-0.149338	0.00658819	1.01974	3.78666e-81	0.925282	7.88892e-65	-1.16908	9.44966e-102	-0.0944571	0.0126984	-1.07462	5.86805e-83
Unigene60281_All	9.85	5.99	6.64	2.32	1.9	1.33	0.56	1.55	1.25	2.19	3.99	2.5	-1.36828	1.21551e-123	-2.01773	4.11281e-212	-2.72968	1.1536e-301	0.649451	8.29607e-16	-0.71195	6.06659e-12	1.3614	1.82128e-48
CL8026.Contig1_All	2.75	4.44	3.3	6.57	6.34	5.26	5.75	4.86	5.75	2.63	4.85	5.63	0.327636	2.55356e-06	0.794659	2.17751e-32	0.647909	4.43026e-21	-0.467023	4.62902e-14	-0.146749	0.0051605	-0.320273	3.72924e-07
Unigene29868_All	0.48	0.63	0.65	1.62	1.32	0.86	0.97	1.29	0.95	0.1	0.11	0.21	-2.03784	2.79887e-11	1.10755	5.09435e-10	0.877032	1.63046e-06	-3.14539	6.21259e-35	-0.230519	0.0417911	-2.91487	9.77245e-28
Unigene57224_All	2.9	2.22	1.56	2.11	2.4	3.21	1.2	1.67	1.2	0.46	0.59	0.92	-1.75512	2.35514e-61	0.210557	0.00202025	-0.705659	1.53464e-15	-1.96567	2.19765e-82	-0.916215	1.24945e-26	-1.04946	1.80608e-18
Unigene57756_All	0.7	0.78	0.35	1.78	1.9	1.99	0.43	0.64	1.26	0.14	0.5	0.41	-0.782456	0.000109387	1.63547	2.12038e-30	0.362347	0.0145936	-2.41792	4.60154e-50	-1.27312	2.32965e-21	-1.1448	9.45777e-09
CL11493.Contig3_All	0.48	0.44	0.34	0.95	1.11	0.51	0.13	0.55	0.43	0.11	0.27	0.2	-1.11966	9.56674e-05	1.02877	6.01217e-07	-0.175347	0.143531	-2.14843	1.93523e-17	-1.20412	2.12408e-08	-0.944315	0.00100998
CL2743.Contig2_All	0.42	0.53	0.18	1.99	1.42	1.74	0.47	1.2	1.01	0.2	0.64	0.51	0.258337	0.0397109	2.17932	2.35227e-64	1.24308	1.67869e-16	-1.92098	1.22974e-55	-0.936235	1.66283e-19	-0.984744	5.2975e-12
CL1085.Contig9_All	1.43	1.73	1.29	1.85	2.02	1.23	3.44	2.15	2.32	1.05	1.83	2.76	0.35211	0.000133862	0.199133	0.016272	0.835255	4.9799e-20	0.152977	0.0192493	0.636122	4.03585e-13	-0.483145	8.73054e-09
CL12942.Contig2_All	13.49	11.07	14.93	12.92	13.72	12.25	12.79	15.2	11.8	7.23	15.38	12.21	-0.175401	2.19442e-06	-0.0194481	0.157205	0.0207337	0.161988	-0.155953	1.29043e-05	0.0401817	0.0807307	-0.196135	1.60948e-07
CL5423.Contig14_All	4.41	2.5	3.88	5.39	6.98	4.37	6.72	8.51	4.87	1.87	1.33	1.21	-1.28355	4.00789e-43	0.635742	2.14233e-21	0.909251	1.21259e-45	-1.91929	5.25925e-117	0.273509	9.63618e-07	-2.1928	4.70288e-166
Unigene4190_All	1.37	2.48	0.9	4.08	4.64	1.64	3.78	4.33	5.02	1.51	2.26	3.34	0.593797	7.58387e-08	1.1297	1.247e-27	1.47701	2.20535e-51	-0.535903	2.62327e-09	0.347313	7.62734e-06	-0.883216	9.09667e-24
CL6579.Contig2_All	6.66	6.88	6.3	10.7	9.41	5.94	6.47	7.94	7.96	4.34	9.13	8.5	0.15587	0.00142206	0.397029	2.91243e-14	0.183483	0.000335394	-0.241159	5.7597e-07	-0.213547	1.3341e-05	-0.0276122	0.148893
CL4286.Contig12_All	2.82	1.77	1.97	2.74	4.31	3.29	0.76	1.58	2.37	1.09	0.93	1.46	-0.91045	2.72323e-46	0.657536	1.87354e-41	-0.469257	1.88313e-15	-1.56799	1.77104e-167	-1.12679	3.34951e-100	-0.441193	1.04951e-10
Unigene50435_All	0.19	0.16	0.29	1.48	0.7	0.64	1.17	1.24	1.68	0.2	0.32	0.36	0.457607	0.0292219	2.14274	6.4892e-24	2.67682	3.89235e-43	-1.68513	2.84386e-18	0.534077	3.08609e-05	-2.21921	2.59968e-35
Unigene22315_All	0.29	0.22	0.38	0.11	0.32	0.48	0.61	0.25	0.49	0.1	0.32	0.24	-0.419223	0.0412751	0.037234	0.219543	0.623911	0.00434377	-0.456457	0.0208967	0.586677	0.00593193	-1.04313	3.33747e-05
CL12096.Contig3_All	4.18	4.98	3.43	4.62	4.98	5.56	3.67	3.62	3.42	2.49	3.72	4.92	-0.165223	0.0227326	0.272238	0.000797725	-0.21868	0.00836771	-0.43746	3.52476e-07	-0.490918	5.06035e-08	0.0534576	0.145748
Unigene41676_All	0.19	0.47	0.19	0.38	0.42	0.38	0.52	0.32	0.52	0.38	0.84	0.59	1.10178	0.00179197	0.476189	0.0803742	0.700183	0.0333125	0.625589	0.0155147	0.223993	0.149332	0.401596	0.0685849
CL11939.Contig3_All	1.24	0.55	1.3	1.54	1.25	0.66	0.47	1.35	0.72	0.24	0.34	0.41	-1.63747	2.24233e-35	0.162308	0.0290918	-0.269885	0.00376703	-1.79977	6.12365e-45	-0.432193	1.03124e-05	-1.36758	4.72215e-23
CL6910.Contig14_All	2.8	1.9	2.46	1.44	1.71	2.47	2.05	1.22	2.07	1.19	2.71	2.24	-0.216612	0.00238912	-0.346426	1.39413e-05	-0.418564	3.61733e-07	0.129814	0.0229678	-0.0721381	0.114319	0.201952	0.00656123
CL4022.Contig2_All	1.38	1.63	1.23	1.97	2.2	1.8	1.14	1.26	1.33	0.53	1.66	1.5	-0.196504	0.0104262	0.497443	1.30348e-09	-0.174904	0.0209578	-0.693948	2.16473e-16	-0.672348	3.92055e-15	-0.0216004	0.195846
Unigene28132_All	0.61	0.46	0.16	1.7	0.72	1.56	0.6	1.07	0.73	0.09	0.09	0.13	-1.96108	7.61749e-09	1.69159	4.66117e-20	0.970655	1.89489e-06	-3.65267	1.82739e-45	-0.720936	2.06109e-06	-2.93174	1.62693e-23
Unigene37487_All	2.66	2.76	3.13	5.42	5.27	4.84	2.58	6.64	5.96	1.99	2.93	3.44	-0.0275162	0.154085	0.863117	2.10423e-59	0.837629	2.08425e-55	-0.890633	2.88148e-63	-0.0254885	0.151515	-0.865145	9.2623e-59
CL2196.Contig8_All	1.02	0.56	0.81	0.47	0.5	0.35	0.19	0.34	0.44	0.37	0.48	0.55	-0.764964	1.66667e-10	-0.854342	3.55006e-12	-1.27845	9.66477e-22	0.0893773	0.0849615	-0.424112	0.0023235	0.513489	0.00027748
Unigene22732_All	0.89	0.63	0.76	0.93	0.87	1.41	1.61	0.82	1.35	0.56	1.15	0.97	0.235713	0.0369278	0.492439	0.000483191	0.731944	2.96864e-07	-0.256726	0.0139816	0.239505	0.0236133	-0.496231	0.000150863
Unigene38963_All	2.48	3.51	2.91	3.02	3.46	2.68	1.71	2.39	1.96	0.5	0.48	0.27	-2.82152	1.03492e-54	0.0456951	0.1737	-0.539331	5.27396e-06	-2.86722	1.39883e-57	-0.585026	7.65573e-07	-2.28219	2.01769e-30
CL501.Contig29_All	100.64	106.95	93.72	44.19	59.33	72.25	18.64	44.56	38.98	48.71	55	64.67	-0.828677	0	-0.774473	0	-1.54368	0	-0.0542034	0.00324723	-0.76921	2.54008e-195	0.715007	5.17862e-167
CL4421.Contig4_All	2.04	1.65	1.1	1.01	2	1.47	0.67	0.75	0.84	0.44	0.63	0.47	-1.62622	1.1251e-29	-0.0914818	0.111512	-1.07512	2.18735e-16	-1.53473	3.88877e-26	-0.98364	1.29773e-13	-0.551094	0.000551373
Unigene32107_All	1.78	1.71	1.72	2.84	2.35	2.64	2.67	1.76	3.34	1.67	3.41	2.81	0.60546	6.62568e-11	0.590783	2.61889e-10	0.581422	5.69424e-10	0.0146773	0.133349	-0.00936063	0.224308	0.0240379	0.186342
CL3755.Contig7_All	0.44	0.29	0.64	0.74	0.49	0.43	0.36	0.75	0.33	0.18	0.39	0.15	-0.93744	4.35469e-08	0.28484	0.0148898	0.0796979	0.164675	-1.22228	8.74757e-14	-0.205142	0.0438734	-1.01714	2.43743e-09
CL6708.Contig3_All	1.41	2.05	0.88	2.77	1.77	2.12	1.29	2.16	1.06	0.86	0.88	0.79	-0.78066	2.01015e-14	0.620377	1.33492e-14	0.0622173	0.13933	-1.40104	4.35313e-52	-0.55816	2.49824e-12	-0.842877	1.01965e-16
Unigene32543_All	0.6	0.73	0.61	0.86	0.65	1.05	0.94	0.7	1.17	0.79	0.43	0.33	-0.31085	0.0252309	0.401457	0.00494446	0.541606	0.00030158	-0.712307	8.24595e-06	0.140149	0.096375	-0.852456	1.89335e-07
Unigene41838_All	4.67	4.65	4.77	6.73	5.35	5.91	4.23	4.87	5.51	1.25	3.94	4.25	-0.569208	9.40075e-18	0.356094	2.51135e-10	0.0614773	0.0920495	-0.925301	1.72736e-49	-0.294616	1.01197e-07	-0.630685	1.18873e-21
CL6208.Contig5_All	2.11	2.09	1.87	3.24	3.51	3.86	1.08	2.96	2.92	0.67	1.68	1.29	-0.730867	4.48203e-11	0.809276	6.91434e-21	0.212945	0.00954454	-1.54014	5.1316e-56	-0.596331	6.56083e-13	-0.943812	2.87571e-18
CL8133.Contig7_All	12.94	16.03	14.47	5.28	8.01	8.97	9.2	5.24	6.64	4.09	13	8.77	-0.740208	7.82642e-54	-0.962182	1.38009e-82	-1.03464	1.31072e-92	0.221974	2.0434e-05	-0.0724564	0.0655194	0.29443	1.3923e-07
Unigene61531_All	3.02	1.86	1.87	0.93	2.94	3.22	0.76	1.1	0.28	0.27	0.77	0.73	-1.92524	2.53963e-57	0.0733522	0.107291	-1.64555	4.97436e-46	-1.99859	1.96111e-63	-1.7189	3.49365e-51	-0.279692	0.0238898
CL2206.Contig36_All	0.58	0.55	0.46	1.15	0.52	1.31	0.17	0.61	0.63	0.35	0.27	0.41	-0.635045	0.000457534	0.909461	1.19794e-09	-0.159841	0.112371	-1.54451	2.29834e-20	-1.0693	5.36761e-12	-0.475203	0.00627948
CL5768.Contig7_All	2.88	2.11	2.5	2.56	3.69	3.75	0.91	2.57	2.18	1	1.42	1.32	-0.997546	1.88217e-38	0.418262	2.80976e-12	-0.393735	9.04519e-09	-1.41581	3.13457e-87	-0.811997	6.16387e-36	-0.603811	1.60227e-13
CL3261.Contig18_All	9.49	11.96	9.66	15.61	12.67	12.58	14.07	12.17	13.54	9.14	16.31	13.77	0.343706	1.31928e-13	0.397733	1.07158e-17	0.365413	5.07069e-15	-0.0540271	0.0370206	-0.0323197	0.124247	-0.0217074	0.153335
CL491.Contig1_All	0.76	0.32	0.82	1.19	1.15	0.84	0.5	0.86	0.67	0.19	0.55	0.48	-0.614878	0.0118575	0.748438	0.000664687	0.111002	0.185607	-1.36332	6.68655e-08	-0.637436	0.0024258	-0.72588	0.00459818
CL1202.Contig4_All	0.69	0.59	0.92	0.48	0.48	0.42	0.47	0.53	0.57	0.75	0.87	0.43	-0.0996749	0.0861221	-0.666613	5.83521e-09	-0.48138	9.88304e-06	0.566938	4.09659e-07	0.185234	0.0435348	0.381705	0.000323554
CL1318.Contig1_All	5.03	6.13	3.83	2.93	2.11	2.4	1.36	2.06	2.79	2.23	3.62	4.87	-0.475483	1.6504e-11	-1.00834	1.76917e-37	-1.2628	7.57419e-53	0.532855	1.21762e-10	-0.254461	0.00349031	0.787315	8.49263e-19
Unigene46710_All	0.6	0.36	0.64	1.35	0.59	0.56	0.44	0.39	0.72	0.91	0.66	0.92	0.664373	0.00626217	0.65761	0.00774136	-0.0243994	0.246849	0.00676351	0.149769	-0.682009	0.00658265	0.688773	0.00553817
CL16046.Contig6_All	9.5	7.77	8.94	7.67	7.45	8.45	6.28	10.15	10.06	5.55	10.47	9.41	-0.0346875	0.122384	-0.14947	0.00185953	0.0280164	0.164052	0.114783	0.00590727	0.177487	0.000340557	-0.0627039	0.061615
Unigene38336_All	0.47	0.53	0.52	0.36	0.67	0.7	0.41	0.45	0.56	0.26	0.45	0.46	-0.369476	0.0197515	0.18605	0.0886704	-0.0969078	0.172264	-0.555526	0.00102182	-0.282958	0.0411209	-0.272568	0.0524069
CL3640.Contig4_All	3.77	3.81	3.5	4.67	6.17	7.69	2.94	4.8	5.47	1.69	3.24	3.28	-0.427005	5.14333e-13	0.743053	6.54007e-52	0.260928	5.19193e-07	-1.17006	6.63404e-110	-0.482125	8.4546e-25	-0.687933	2.91044e-33
Unigene35543_All	0.24	0.25	0.17	0.31	0.15	0.45	0.1	0.36	0.21	0.1	0.22	0.14	-0.49058	0.00569708	0.472593	0.00279088	0.0522476	0.210573	-0.963174	1.44378e-07	-0.420346	0.00594165	-0.542828	0.0029462
Unigene42814_All	0.64	1.1	0.64	1.32	1.23	1.51	0.55	0.72	0.73	0.32	0.45	0.4	-1.0137	0.000886964	0.777552	0.00067177	-0.228882	0.127054	-1.79125	3.49528e-10	-1.00643	4.4364e-05	-0.784817	0.00800154
CL8499.Contig25_All	1.37	1.04	0.97	1.36	2.3	2.01	0.34	1.31	1.33	0.39	0.46	0.37	-1.46326	1.01699e-25	0.748093	3.73259e-15	-0.167743	0.0435287	-2.21135	1.39402e-72	-0.915836	1.49147e-20	-1.29552	2.0515e-19
CL1204.Contig2_All	3.74	4.87	3.53	9.08	6.15	4.36	10.52	7.13	6.7	2.45	5.88	5.98	0.250316	0.00252508	0.69597	1.34866e-15	1.01815	1.28481e-34	-0.445654	2.62844e-08	0.322182	5.70029e-06	-0.767835	2.51213e-22
Unigene37651_All	5.49	7.29	3.24	5.88	6.46	7.2	1.03	3.33	2.6	1.02	2.68	2.09	-1.46752	1.83111e-166	0.288159	1.93545e-13	-1.19045	5.96608e-120	-1.75568	1.97889e-262	-1.47861	6.35303e-203	-0.277074	1.04194e-05
Unigene12268_All	0.37	0.21	0.29	0.75	0.76	0.87	0.44	0.45	0.58	0.24	0.35	0.33	0.0791553	0.175558	1.45797	7.67567e-13	0.776332	0.000335997	-1.37881	2.52261e-12	-0.681638	6.55377e-05	-0.697176	0.00077631
CL17092.Contig68_All	0.43	0.2	0.42	0.24	0.4	0.38	0.21	0.27	0.27	0.2	0.24	0.55	-0.081078	0.152682	-0.0528364	0.192457	-0.482341	0.00448562	-0.0282416	0.135093	-0.429505	0.00904578	0.401263	0.0118219
Unigene11239_All	2.37	1.85	2.64	2.65	2.74	3.9	2.52	3.06	1.91	0.44	1.47	0.75	-1.36581	2.20236e-27	0.438396	1.08776e-06	0.135963	0.0520597	-1.80421	6.89459e-54	-0.302433	0.000350278	-1.50178	5.29398e-34
Unigene21762_All	0.48	0.19	0.38	0.74	0.91	0.44	0.26	0.51	0.37	0.11	0.4	0.5	-0.0485513	0.177489	0.983794	1.06807e-12	0.12892	0.123559	-1.03235	5.50541e-14	-0.854873	2.35345e-10	-0.177472	0.0737399
Unigene19331_All	1.87	1.72	1.49	1.65	2.65	1.56	0.98	2.32	2.25	1.41	2.97	1.95	0.319694	9.77173e-06	0.206658	0.00279785	0.138345	0.0261848	0.113036	0.0214329	-0.0683131	0.101486	0.181349	0.00468431
CL1983.Contig4_All	1.76	2.63	2.22	3.99	2.94	2.85	2.87	3.31	3.14	1.81	2.83	2.84	0.182553	0.000475818	0.567914	2.54775e-26	0.501775	1.87161e-20	-0.385361	3.01174e-14	-0.0661382	0.0527418	-0.319223	6.01227e-10
CL17081.Contig15_All	1.69	2.35	2.42	2.41	0.67	1.52	2.79	3.54	1.1	1.49	1.83	1.2	-0.513139	6.27591e-09	-0.486382	3.65467e-08	0.212114	0.00307636	-0.0267571	0.122298	0.698496	7.98428e-16	-0.725253	6.19466e-17
Unigene49618_All	0.94	0.99	0.71	2.5	1.32	1.3	1.46	1.4	1.38	0.87	0.98	1.33	0.283892	0.0205227	0.962273	6.50874e-12	0.695569	1.41593e-06	-0.678381	1.14513e-07	-0.266704	0.0113058	-0.411677	0.00121629
Unigene57534_All	0.71	0.52	0.94	0.43	0.75	0.69	0.15	0.43	0.27	0.39	0.78	0.38	-0.476384	0.0283901	-0.213251	0.120782	-1.32248	4.806e-05	-0.263133	0.063706	-1.10923	0.000685078	0.846095	0.00692986
CL7963.Contig7_All	5.88	3.83	4.71	3.87	5.63	5.66	1.39	4.12	4.57	2.21	4.79	1.87	-0.695637	1.96951e-22	0.0747403	0.0677064	-0.50327	3.35453e-13	-0.770378	5.35927e-28	-0.578011	3.38513e-17	-0.192367	0.0045697
CL3770.Contig6_All	4.34	1.21	4.11	4.07	4.16	2.47	6.33	5.92	6.36	2.04	1.2	1.23	-1.10792	4.68528e-49	0.149199	0.00491645	0.951207	4.0177e-72	-1.25712	4.30024e-66	0.802008	2.49956e-54	-2.05913	1.68416e-227
CL2298.Contig15_All	0.74	0.6	0.95	0.74	0.7	0.78	0.55	0.93	0.96	0.85	1.87	1.41	0.852949	2.04041e-14	-0.0384061	0.19343	0.101981	0.124315	0.891355	1.22995e-15	0.140387	0.0792946	0.750968	7.05882e-12
Unigene25573_All	2.54	2.24	1.08	2.01	4.76	5.59	0.74	1.67	2.77	0.54	0.51	0.28	-2.14168	2.23145e-70	1.0773	2.19948e-54	-0.170903	0.0163046	-3.21898	6.59735e-227	-1.2482	5.80128e-68	-1.97078	2.75297e-56
Unigene65627_All	1.69	2.58	0.65	1.53	2.22	2.41	0.49	1.67	1.68	0.51	0.7	0.67	-1.37534	1.69082e-15	0.328097	0.00412876	-0.341148	0.00718532	-1.70343	1.61466e-25	-0.669245	6.58756e-07	-1.03419	1.15443e-08
Unigene29601_All	6.47	7.08	4.33	7.8	20.57	18.03	6.97	8.09	11.39	2.61	3.21	4.73	-0.753862	1.49437e-35	1.37602	4.93594e-235	0.572349	2.98277e-32	-2.12988	0	-0.803673	3.03114e-98	-1.32621	2.90782e-128
CL12820.Contig1_All	34	48.32	31.73	99.6	44.08	39.95	66.41	51.81	58.9	15.49	24.09	7.33	-1.27175	1.01537e-197	0.694431	1.51875e-116	0.652234	3.12982e-101	-1.96618	0	-0.0421974	0.0363636	-1.92398	0
CL1946.Contig55_All	2.18	1.86	2.22	2.77	1.72	1.25	2.15	1.72	2.35	1.11	2.3	1.36	-0.387355	5.74087e-05	-0.123622	0.0603587	-0.00476635	0.25155	-0.263733	0.00228741	0.118856	0.0656846	-0.382588	7.56444e-05
CL15522.Contig14_All	14.09	12.06	21.4	12.63	10.33	5.15	8.34	12.29	6.05	9.41	9.17	13.52	-0.559707	1.43917e-54	-0.754792	8.26719e-91	-0.8218	1.43567e-104	0.195085	4.96106e-07	-0.0670075	0.0367144	0.262093	1.55798e-10
CL2696.Contig6_All	3.33	0.94	2.72	5.12	2.93	1.59	3.19	3.34	5.3	0.76	1.52	0.87	-1.14039	1.42908e-27	0.471516	1.85511e-09	0.767725	3.77465e-24	-1.61191	1.6847e-62	0.296209	1.06387e-05	-1.90811	3.83103e-95
Unigene64534_All	0.92	0.95	0.36	0.57	0.94	0.59	0.27	0.49	0.37	0.63	0.79	0.73	-0.0415933	0.191753	-0.086496	0.173469	-0.971104	3.0898e-05	0.0449027	0.128714	-0.884608	0.000147814	0.929511	5.71243e-05
CL8722.Contig5_All	91.6	70.81	96.33	78.83	29.49	45.52	78.76	68.97	81.63	102.44	139.38	192.68	0.757552	0	-0.744803	0	-0.16461	8.95689e-23	1.50236	0	0.580194	1.74803e-202	0.922162	0
CL967.Contig4_All	3.92	3.58	4.9	3.1	4.18	3.99	1.13	1.97	1.63	0.96	2.17	2.72	-1.07987	1.68843e-60	-0.137897	0.00488479	-1.38123	2.10059e-87	-0.941971	1.07411e-44	-1.24334	8.87148e-68	0.301366	0.000123495
CL10697.Contig3_All	0.95	0.82	1.32	0.31	0.36	0.22	0.41	0.63	0.68	0.49	0.81	0.4	-0.862649	6.37435e-18	-1.78933	1.98296e-51	-0.843356	4.35779e-17	0.926681	4.38444e-12	0.945974	3.90116e-12	-0.0192928	0.205462
CL8602.Contig3_All	3.11	2.55	3.21	2.55	4.39	3.29	2.73	3.04	3.09	1.79	3.55	2.98	-0.0832636	0.0856723	0.208991	0.00437388	0.0101604	0.238996	-0.292255	0.000119558	-0.198831	0.00607137	-0.093424	0.0764176
Unigene45266_All	0.83	0.84	0.58	0.92	0.39	0.61	0.52	0.49	0.63	0.48	0.99	0.52	-0.170173	0.0785391	-0.22204	0.0561083	-0.450569	0.00412971	0.0518671	0.119611	-0.228529	0.0623704	0.280396	0.0349889
CL3918.Contig5_All	18.4	12.14	13.05	8.39	6.44	7.47	4.48	6.26	5.39	6.55	13.43	13.71	-0.365197	1.34902e-25	-0.963834	4.92098e-135	-1.42436	3.60812e-249	0.598637	1.01583e-47	-0.460531	2.65647e-20	1.05917	7.01051e-123
Unigene38555_All	0.31	0.17	0.41	0.62	0.31	0.41	0.52	0.51	0.62	0.11	0.37	0.33	-0.117203	0.178301	0.58722	0.0322712	0.896649	0.00349066	-0.704424	0.0101736	0.309429	0.0892924	-1.01385	0.00131752
Unigene18966_All	1.15	1.01	1.17	1.8	1.17	1.47	1.04	1.48	1.11	0.82	1.73	1.77	0.387836	0.000227773	0.416412	0.000102003	0.135181	0.078447	-0.0285755	0.122524	-0.281231	0.00405864	0.252656	0.00727013
CL12980.Contig3_All	12.83	15.14	9.68	15.04	17.34	19.95	3.27	9.94	11.23	1.68	3.91	3.2	-2.09311	0	0.476782	2.15982e-46	-0.612315	4.66355e-52	-2.5699	0	-1.0891	4.65075e-189	-1.4808	7.92441e-145
CL7562.Contig6_All	2.79	5.57	3.97	7.85	7.32	8.28	7.7	7.61	8.44	2.07	3.72	4.54	-0.248669	1.34777e-05	0.929817	6.97323e-80	0.951247	7.09773e-84	-1.17849	6.95365e-118	0.0214295	0.158018	-1.19992	3.05144e-122
Unigene21800_All	4.51	14.51	7.99	27.02	14.79	8.58	28.77	20.48	26.26	8.94	16.23	18.85	0.712137	2.46825e-66	0.904375	2.89086e-112	1.48936	0	-0.192237	1.49722e-08	0.58499	8.01985e-79	-0.777227	5.88051e-130
CL3549.Contig31_All	17.2	13.15	18.5	15.3	11.85	14.47	13.41	21.04	17.74	8.7	16.91	12	-0.371228	2.49569e-26	-0.227743	1.92621e-11	0.106536	0.000429117	-0.143484	1.93622e-05	0.33428	3.56243e-23	-0.477764	1.25658e-43
Unigene64560_All	0.18	0.57	0.53	0.75	0.66	0.98	1.32	2.89	1.34	0.65	0.84	0.28	0.467703	0.000289429	0.896568	3.62846e-12	2.1246	3.19505e-90	-0.428866	7.60329e-05	1.22803	4.96789e-42	-1.6569	2.1631e-65
CL9153.Contig9_All	13.71	5.22	13.41	4.07	5.72	9.72	3	10.37	8.32	5.56	8.6	3.7	-0.855754	1.64506e-177	-0.729291	2.62003e-134	-0.566463	4.22597e-86	-0.126463	4.89377e-05	0.162828	3.26362e-07	-0.289291	2.58721e-18
Unigene57951_All	50.66	35.24	32.25	20.2	49.22	32.13	16.76	19.15	30.16	25.12	56.91	55.87	0.237485	1.39558e-15	-0.214149	2.76816e-11	-0.823403	1.90392e-114	0.451634	4.9371e-48	-0.609254	6.27184e-59	1.06089	6.18482e-206
Unigene36347_All	0.6	0.4	0.51	0.44	0.6	0.35	2.12	1.01	0.83	1.18	1.39	1.07	1.28698	1.35889e-07	-0.113904	0.183198	1.41072	6.65243e-09	1.40089	1.27403e-08	1.52463	9.03435e-10	-0.123739	0.133519
CL9016.Contig9_All	1.36	0.53	0.75	1.43	1.03	1.4	0.94	1.12	1.08	0.2	0.48	0.42	-1.24798	3.38418e-21	0.552201	7.81642e-09	0.260818	0.00414916	-1.80019	1.00377e-50	-0.291383	0.000708087	-1.5088	1.41961e-32
CL2731.Contig8_All	0.59	0.37	0.73	0.81	0.67	0.63	0.5	0.8	0.66	0.55	0.71	1.03	0.452514	0.00167882	0.319335	0.0174845	0.227767	0.0558977	0.133179	0.0633222	-0.0915681	0.148688	0.224747	0.041856
CL16232.Contig9_All	0.64	0.31	0.48	2.67	1.06	1.6	4.51	2.84	4.23	0.73	1.53	1.38	1.35142	3.37477e-17	1.90265	2.99893e-38	3.02189	7.8955e-137	-0.551224	5.12348e-07	1.11925	1.50108e-37	-1.67047	4.59883e-68
Unigene22113_All	1.6	1.07	1.22	1.38	1.45	2.36	0.49	0.86	1.2	0.33	0.49	1.05	-1.04217	2.38377e-12	0.41772	0.000153103	-0.602484	8.31992e-06	-1.45989	7.61482e-26	-1.0202	3.83313e-15	-0.43969	0.00288056
CL6613.Contig2_All	32.89	26.4	16.05	19.3	25.82	22.98	20.18	18.18	25.01	15.23	22.37	27.91	-0.183362	2.92886e-05	-0.140399	0.000909441	-0.230821	4.65793e-07	-0.0429635	0.0604082	-0.0904223	0.0193326	0.0474588	0.0857647
CL437.Contig2_All	2.38	2.72	2.47	3.61	3.54	3.42	2.51	3.51	2.78	1.56	3.44	2.55	0.00102035	0.22097	0.483587	2.01774e-10	0.229711	0.00173168	-0.482566	9.57503e-11	-0.253876	0.000258005	-0.22869	0.00153416
Unigene16496_All	0	0	0	3.64	4.28	2.4	7.63	8.55	6.64	0	0	0			11.957	2.6841e-236	13.1066	0	-11.9707	2.80218e-237	1.14959	2.50853e-204	-13.1203	0
CL6861.Contig7_All	0.54	0.32	0.51	0.98	0.68	0.67	0.42	0.61	0.71	0.21	0.56	0.76	0.172961	0.0845243	0.778003	8.55255e-07	0.362165	0.0135194	-0.605042	2.79558e-05	-0.415838	0.00245372	-0.189204	0.0709492
Unigene1438_All	1.79	1.64	1.77	1.31	2.65	1.65	3.38	2.92	3.5	1.05	1.83	1.79	-0.143536	0.072376	0.11044	0.10697	0.92374	1.06814e-16	-0.253976	0.00965316	0.8133	8.77247e-14	-1.06728	7.41059e-21
Unigene95483_All	6.06	6.02	4.54	4.6	4.19	3.04	3.43	3.55	2.11	2.7	9.53	11.88	0.54487	4.5733e-25	-0.486976	1.06299e-14	-0.861343	5.03063e-37	1.03185	2.95504e-72	-0.374367	2.01845e-07	1.40621	1.00596e-115
Unigene191_All	0.57	0.93	0.84	1.01	1.27	0.55	0.38	0.98	0.44	0.2	0.66	0.32	-0.978338	3.68244e-13	0.275964	0.00425994	-0.366211	0.00117361	-1.2543	1.62705e-22	-0.642176	2.44667e-08	-0.612127	1.0614e-05
CL1767.Contig3_All	13.9	16.31	7.55	6.72	6.46	5.39	4.22	4.27	3.66	3.52	7.01	9.51	-0.90739	3.66405e-117	-1.02117	2.19261e-141	-1.62905	8.65646e-289	0.113782	0.00302404	-0.607882	8.54842e-30	0.721663	3.75539e-43
CL2601.Contig4_All	4.91	4.42	4.15	3.4	6.36	4.96	2.82	4.31	4	1.22	3.36	1.58	-1.12864	9.31836e-83	0.127583	0.0025287	-0.26773	6.90761e-08	-1.25622	7.2321e-107	-0.395313	1.16406e-15	-0.860906	1.43495e-44
CL616.Contig22_All	24.71	10.76	28.11	13.02	5.21	6.66	8.3	6.38	5.81	15.67	33.47	39.75	0.492586	1.56228e-64	-1.34746	2.86449e-248	-1.62509	0	1.84004	0	-0.277631	9.66741e-08	2.11767	0
Unigene2500_All	0.21	0.16	0.37	0.47	0.88	0.58	0.26	0.36	0.52	0.21	0.15	0.45	0.178946	0.170301	1.40436	0.000421579	0.664203	0.0546574	-1.22541	0.000644076	-0.740153	0.0171707	-0.485257	0.080451
CL5494.Contig2_All	4.6	4.57	3.22	3.3	5.88	5.7	1.5	3.51	3.38	1.38	1.34	1.57	-1.52471	3.60062e-181	0.26433	8.37725e-12	-0.554472	1.0387e-34	-1.78904	1.21942e-272	-0.818802	3.20759e-80	-0.970238	1.69779e-61
CL4973.Contig3_All	2.63	2.41	1.65	2.52	4.34	3.79	1.14	2.26	1.41	0.77	1.04	1.13	-1.1829	1.48487e-47	0.672117	1.05191e-29	-0.468281	6.56747e-11	-1.85502	7.54523e-144	-1.1404	1.20518e-69	-0.714621	5.3401e-16
Unigene35725_All	0.99	1.18	0.89	1.73	1.28	0.9	1.02	1.07	1.22	0.26	0.26	0.13	-2.24668	6.87864e-60	0.360367	1.84526e-05	0.122173	0.0573775	-2.60705	1.24824e-90	-0.238194	0.00214134	-2.36885	7.83871e-69
CL291.Contig6_All	28.82	79.81	65.19	5.99	2.58	8.57	0.6	1.89	1.02	41.88	26.05	50.72	-0.543424	3.26967e-175	-3.33978	0	-5.61468	0	2.79635	0	-2.27491	1.13147e-164	5.07126	0
CL814.Contig18_All	8.98	6.15	7.84	7.21	4.3	5.91	2.96	6.67	6.62	3.55	8.43	4.34	-0.490856	4.43754e-33	-0.395463	1.25536e-22	-0.48955	1.47794e-32	-0.0953934	0.00560654	-0.0940876	0.011061	-0.00130572	0.227699
CL10956.Contig1_All	2.6	7.56	5.68	11.36	7.68	5.38	24.29	11.67	10.53	10.21	13.71	17.42	1.39786	5.7032e-104	0.630901	1.06728e-17	1.56559	2.43377e-136	0.766961	1.97856e-40	0.934687	2.48126e-61	-0.167725	0.000250377
Unigene21212_All	0.13	0.38	0.2	0.55	0.4	0.26	0.22	0.55	0.34	0.15	0.45	0.21	0.188554	0.0953986	0.766955	4.1749e-05	0.662734	0.000401005	-0.5784	0.000481538	-0.104221	0.146039	-0.47418	0.00462815
CL1129.Contig21_All	0.25	0.27	0.22	0.51	0.91	0.38	0.29	0.43	0.81	0.27	0.41	0.16	0.182836	0.0934716	1.29282	2.55758e-14	1.05644	1.815e-09	-1.10998	5.23059e-12	-0.236371	0.0300916	-0.873608	1.83408e-07
CL2861.Contig7_All	1.36	1.75	1.72	4.39	2.83	1.51	6.79	4.4	2.04	1.55	2.38	2.78	0.48192	1.37582e-06	0.857595	9.82774e-19	1.45993	6.55185e-62	-0.375675	6.1876e-06	0.602331	1.39546e-15	-0.978006	6.65836e-34
CL16745.Contig2_All	0.15	0.05	0.15	0.11	0.38	0.25	0.26	0.4	0.12	0.04	0.04	0.06	-1.37316	0.00906848	1.05574	0.00416039	1.15359	0.00202625	-2.4289	1.1323e-06	0.0978502	0.19479	-2.52675	5.86059e-07
CL3728.Contig15_All	1.57	0.75	1.01	0.69	0.58	0.69	0.22	0.67	0.5	0.41	1.01	0.9	-0.519543	9.55919e-10	-0.764115	2.47181e-17	-1.25102	8.94226e-37	0.244572	0.00260171	-0.486906	7.48582e-06	0.731478	6.45951e-12
CL6727.Contig21_All	3.93	2.81	3.36	1.83	2.98	1.9	1.51	0.69	1.58	6.4	22.61	17.49	2.21064	0	-0.588225	7.50037e-11	-1.409	1.37735e-40	2.79887	0	-0.820776	1.52437e-12	3.61965	0
CL73.Contig9_All	0.8	0.67	1.27	0.3	0.97	0.87	0.62	0.64	0.26	0.81	1.26	0.78	0.0676983	0.144217	-0.355323	0.00450954	-0.833936	4.33601e-08	0.423021	0.000548743	-0.478613	0.00144142	0.901635	1.98567e-09
Unigene20774_All	1.39	0.7	1.28	0.99	1.24	1.35	0.49	1.29	1.23	0.25	0.61	0.37	-1.45287	3.79384e-29	0.0893775	0.101929	-0.15078	0.047208	-1.54225	7.87413e-34	-0.240157	0.00669435	-1.30209	1.48822e-22
CL663.Contig7_All	13.18	5.46	8.8	20.31	12.99	17.66	21.22	25.94	34.93	4.16	8.17	10.74	-0.244804	2.26453e-14	0.896481	1.95072e-248	1.5866	0	-1.14129	0	0.69012	7.33043e-254	-1.83141	0
CL4159.Contig6_All	3.19	4.33	1.36	2.47	1.86	0.79	0.41	0.86	0.59	0.93	1.14	1	-1.52493	8.82863e-60	-0.791145	8.03429e-22	-2.24096	1.79627e-98	-0.73379	2.3857e-12	-1.44981	1.62726e-32	0.716021	1.0337e-07
Unigene27647_All	0.66	0.62	0.6	0.74	0.68	0.45	1.69	0.75	0.8	0.44	0.75	0.54	-0.109969	0.149852	-0.00347352	0.240283	0.795354	2.9316e-05	-0.106496	0.102271	0.798827	2.70832e-05	-0.905323	3.22059e-06
CL15918.Contig9_All	1.61	1.15	1.23	1.57	1.04	1.21	0.42	1.25	1.1	0.6	0.88	0.49	-1.01355	9.738e-21	-0.0586951	0.139628	-0.516556	1.47557e-07	-0.954859	1.53604e-18	-0.457861	3.19572e-06	-0.496998	1.32248e-05
CL1268.Contig14_All	2.61	2.73	2.55	1.19	1.56	1.63	1.47	1.78	2.16	0.96	0.95	1.88	-1.05147	6.47876e-95	-0.846508	3.63235e-66	-0.539628	7.90582e-31	-0.204958	0.000110549	0.30688	8.33817e-09	-0.511838	4.23896e-20
CL2969.Contig7_All	0.32	0.63	1.16	1.82	1.81	1.19	1.38	1.42	0.34	0.58	1.29	1.83	0.818894	1.96246e-08	1.19079	1.78569e-17	0.586251	7.95496e-05	-0.371896	0.000467003	-0.604539	1.0185e-06	0.232643	0.0248491
Unigene39944_All	0.18	0.09	0.23	0.23	0.5	0.51	0.23	0.32	0.18	0.09	0.14	0.22	-0.151202	0.185753	1.29771	0.00305591	0.552695	0.0967369	-1.44892	0.000834621	-0.745019	0.0299585	-0.703897	0.0600692
CL1342.Contig9_All	1.62	1.41	1.37	1.88	2.38	3.34	0.6	1.26	1.54	0.54	0.91	0.89	-0.906095	1.6183e-17	0.789088	5.37923e-23	-0.360008	0.00010434	-1.69518	6.95494e-74	-1.1491	3.39309e-41	-0.546087	7.78488e-07
CL6466.Contig5_All	0.76	0.29	0.56	0.51	0.58	1.02	0.18	0.39	0.32	0.22	0.15	0.22	-1.42937	1.09089e-13	0.391561	0.00217502	-0.840188	9.73047e-07	-1.82094	4.6463e-24	-1.23175	5.62098e-14	-0.589187	0.00296936
CL4032.Contig7_All	0.54	0.38	0.58	1.03	0.8	0.52	0.58	0.79	0.84	0.22	0.65	0.55	-0.0615288	0.175292	0.648492	0.000113897	0.567754	0.000699316	-0.710021	1.76293e-05	-0.0807379	0.160355	-0.629283	0.000209822
CL497.Contig16_All	1	1.5	1.14	1.52	1.06	0.76	2.36	1.98	1.19	0.65	2.24	1.55	0.290987	0.00252491	-0.119661	0.0871047	0.610716	2.70548e-09	0.410648	5.50674e-05	0.730377	4.51416e-12	-0.319729	0.000444264
Unigene57848_All	0.93	1.77	0.99	3.07	2.91	2.62	2.24	3.02	3.79	0.35	0.63	0.76	-1.07295	5.82808e-08	1.22273	3.34734e-19	1.30759	3.29289e-22	-2.29568	1.32708e-44	0.0848623	0.1186	-2.38054	1.22338e-48
CL7791.Contig3_All	4.78	5.12	3.5	3.29	4.39	3.05	1.35	3.13	2.44	0.78	2.22	1.27	-1.64615	1.31362e-74	-0.318439	4.27347e-06	-0.941052	6.68062e-32	-1.32771	1.50695e-44	-0.622613	1.33053e-13	-0.705097	1.78028e-11
Unigene29445_All	1.4	0.72	1.65	2.08	1.74	1.7	1.08	1.64	2.47	0.5	1.23	1.13	-0.391203	4.38444e-05	0.550862	1.12839e-10	0.46787	5.57594e-08	-0.942065	7.08952e-25	-0.082992	0.0844316	-0.859073	3.83112e-20
CL668.Contig26_All	2	2.99	3.05	2.01	1.39	2.27	1.36	2.01	1.6	1.15	1.45	1.54	-0.954896	4.06254e-27	-0.501184	6.495e-10	-0.684787	6.18643e-16	-0.453712	6.98123e-07	-0.183603	0.0156317	-0.270109	0.00235308
CL13714.Contig1_All	3.18	5.06	2.29	10.32	9.95	5.26	2.39	5.05	4.22	1.48	1.82	0.56	-1.43871	4.01268e-25	1.28416	5.07489e-49	0.167683	0.036958	-2.72287	8.48971e-132	-1.11648	1.96169e-39	-1.60639	2.13731e-32
CL9820.Contig2_All	1.26	2.22	2.49	3.63	1.74	1.19	2.56	3.1	2.61	1.02	2.61	2.14	-0.0481053	0.123421	0.13874	0.0161638	0.473001	1.07877e-12	-0.186845	0.00173426	0.334261	1.69641e-07	-0.521106	6.38637e-15
Unigene73271_All	5.37	14.92	9.34	25.85	11.76	10.3	32.52	15.1	23.44	28.03	45.1	52.09	2.09826	0	0.701378	1.22249e-28	1.27947	1.91741e-110	1.39688	2.01228e-223	0.578097	4.79796e-30	0.818785	2.37595e-94
CL348.Contig8_All	1.72	1.64	0.74	1.1	3.24	2.07	2.65	2.14	1.22	0.5	0.56	0.96	-1.00985	4.80297e-21	0.64275	1.68118e-15	0.555054	1.13056e-11	-1.6526	3.93773e-66	-0.0876956	0.0678968	-1.5649	2.91424e-57
CL14742.Contig1_All	4.04	3.52	2.41	2.33	8.5	5.47	2.27	4.79	4.25	1.63	1.79	3.06	-0.610989	1.72344e-10	0.709459	5.11791e-20	0.195462	0.00779116	-1.32045	2.09899e-53	-0.513996	5.47046e-12	-0.806451	8.13905e-18
CL1498.Contig7_All	2.42	1.19	1.75	1.86	2.51	2.86	0.37	1.17	1.21	0.33	0.82	0.57	-1.6412	1.02575e-106	0.429843	1.66486e-16	-0.954278	2.20213e-46	-2.07104	6.69296e-196	-1.38412	2.07789e-110	-0.686919	4.96043e-15
Unigene21371_All	4.55	5.62	4.25	4.04	5.4	8.79	2.7	3.8	3.44	1.66	2.82	2.39	-1.05955	5.48524e-29	0.340842	2.45672e-06	-0.523264	1.0656e-09	-1.40039	2.23715e-55	-0.864106	5.89717e-26	-0.536288	1.2631e-07
CL10052.Contig7_All	19.2	19.22	17.28	14.57	22.11	20.07	7.74	12.45	12.85	8.77	14.42	8.99	-0.785861	9.41506e-96	0.0292243	0.103177	-0.742353	4.40789e-86	-0.815086	3.70509e-104	-0.771578	1.40751e-93	-0.0435082	0.0826802
Unigene54417_All	0.41	0.62	0.32	0.39	1.28	0.9	0.26	0.61	0.72	0.16	0.47	0.22	-0.656542	0.0021554	0.927404	2.60174e-07	0.250639	0.0704461	-1.58395	5.34154e-15	-0.676765	5.9304e-05	-0.907181	3.82144e-05
CL11879.Contig17_All	1.86	1.79	1.44	2.61	2.24	1.96	1.59	1.99	1.44	0.88	2.07	1.8	-0.0927349	0.0875464	0.424948	1.44762e-06	-0.00930779	0.243212	-0.517683	5.3433e-09	-0.434256	9.95564e-07	-0.0834271	0.103787
CL691.Contig2_All	39.78	20.82	39.59	32.31	18.12	21.82	31.52	36.89	29.38	32.42	65.7	56.87	0.636856	1.06054e-185	-0.467283	6.82978e-69	-0.0241345	0.0976539	1.10414	0	0.443149	2.56753e-61	0.66099	1.94137e-197
CL4921.Contig21_All	1.07	1.19	0.54	1.24	0.97	0.63	2.42	1.15	1.05	1.12	1.11	1.57	0.45266	1.19189e-05	0.0279647	0.202219	0.728211	1.63055e-12	0.424695	1.95382e-05	0.700246	8.64112e-12	-0.275551	0.00140078
CL4827.Contig6_All	2.13	0.51	1.72	1.29	0.92	0.91	1.2	1.16	2.26	0.69	1.43	1.05	-0.456884	2.20433e-10	-0.482512	3.73378e-11	0.0837258	0.0656082	0.0256282	0.116947	0.566238	5.73097e-15	-0.54061	4.74026e-14
CL8540.Contig9_All	0.34	0.3	0.5	0.36	0.36	0.61	0.72	0.3	0.61	0.1	0.43	0.34	-0.378945	0.0220325	0.229745	0.0687252	0.522014	0.00193248	-0.60869	0.000694663	0.292268	0.0313104	-0.900958	2.26047e-06
CL14698.Contig2_All	1.39	1.05	1.02	2.73	2.65	3.14	1.62	2.14	2	0.46	1.12	0.93	-0.457682	0.000354196	1.30032	1.66429e-36	0.74424	3.6295e-11	-1.758	1.40474e-56	-0.556081	5.36948e-10	-1.20192	8.97711e-23
CL1640.Contig6_All	0.74	0.77	1.64	3.84	7.96	2.49	0.93	2.37	3.17	0.66	0.3	1.12	-0.589867	0.00019189	2.18254	1.40611e-94	1.05091	2.5444e-16	-2.77241	7.20956e-125	-1.13163	1.58788e-37	-1.64077	8.48429e-31
CL12192.Contig23_All	0.76	0.93	1.14	2.36	1.79	0.74	0.55	1.14	1.65	1.62	0.88	1.9	0.645141	1.45323e-09	0.793359	5.74948e-14	0.246194	0.0124777	-0.148218	0.0207156	-0.547165	4.57254e-08	0.398947	5.29019e-05
Unigene50458_All	2.54	3.08	3.25	3.49	3.49	3.15	3.59	4.22	3.28	2.55	3.82	4.44	0.290274	5.00641e-06	0.192236	0.00170447	0.329735	3.43817e-07	0.0980372	0.0222431	0.137499	0.0107349	-0.0394614	0.133425
CL982.Contig6_All	0.43	0.24	0.4	0.28	0.35	0.55	0.91	0.7	0.77	0.59	0.58	0.53	0.677165	3.82573e-05	0.149653	0.117554	1.16024	3.79731e-13	0.527513	0.000397709	1.01059	7.41638e-11	-0.483076	0.00026637
CL700.Contig10_All	1.63	0.92	1.14	0.28	0.45	0.26	0.23	0.43	0.43	0.91	0.97	0.99	-0.357873	3.87171e-05	-1.90468	6.37397e-56	-1.76072	2.88318e-50	1.54681	6.70683e-34	0.143966	0.104692	1.40285	3.49454e-29
Unigene16724_All	2.04	3.08	1.6	3.99	3.92	3.89	2.5	3.7	2.71	0.95	2.56	1.79	-0.341368	1.527e-05	0.814528	6.29336e-33	0.415642	7.59647e-09	-1.1559	3.93098e-58	-0.398886	2.11951e-10	-0.75701	1.05391e-22
CL1507.Contig17_All	1.87	2.31	1.73	0.67	0.42	0.58	0.46	0.83	0.85	1.18	3.03	2.64	0.219077	0.00109366	-1.82075	2.00721e-65	-1.45862	5.85742e-48	2.03982	8.35997e-89	0.362126	0.00307749	1.6777	4.98113e-68
CL7349.Contig4_All	0.76	0.73	0.98	0.9	1.46	1.53	0.84	1.25	1.03	0.28	0.6	0.59	-0.735458	1.14896e-06	0.659354	4.96966e-08	0.348938	0.00289358	-1.39481	8.00965e-24	-0.310416	0.00283962	-1.0844	1.3862e-13
CL6012.Contig2_All	3.58	3.57	2.44	2.37	3.61	4.03	1.3	2.78	2.55	1.61	2.52	1.83	-0.68041	1.58164e-21	0.0639323	0.0873479	-0.520859	7.31928e-14	-0.744342	3.58997e-26	-0.584791	2.6118e-17	-0.159551	0.0128559
CL5472.Contig17_All	0.44	0.76	0.57	1.21	1.24	1.07	1.14	0.84	0.96	0.42	0.65	0.9	0.159921	0.101927	0.993137	2.67821e-09	0.736617	1.59945e-05	-0.833217	1.06445e-07	-0.25652	0.0270599	-0.576697	0.000303488
Unigene50709_All	1.53	0.73	1.76	1.32	0.7	0.98	1.65	1.31	1.09	0.7	0.75	1.17	-0.604787	0.000265684	-0.4178	0.00574641	0.0277097	0.229065	-0.186988	0.0552047	0.445509	0.00375175	-0.632497	0.000156269
CL6972.Contig10_All	0.66	1.01	0.76	0.74	1.35	1.48	0.71	0.87	0.57	0.07	0.29	0.29	-1.90386	3.28212e-56	0.554785	1.34602e-12	-0.164931	0.0221379	-2.45864	6.33758e-112	-0.719716	7.77404e-19	-1.73893	1.77607e-44
CL1723.Contig5_All	4.17	7.31	2.94	10.65	15.92	14.1	3.12	8.84	9.89	1.78	2.08	3.2	-1.02256	4.28744e-51	1.4968	6.66227e-253	0.610048	2.20787e-32	-2.51936	0	-0.886752	4.83374e-110	-1.63261	3.66675e-156
CL85.Contig7_All	4.28	5.38	6.47	1.59	2.45	1.22	3.05	1.86	4.32	3.37	3.4	5.64	-0.373568	3.01378e-12	-1.61613	9.37502e-127	-0.804384	1.08012e-42	1.24256	2.00864e-67	0.811745	1.48311e-25	0.430816	3.06764e-12
CL10259.Contig8_All	125.08	141.59	103.35	46.95	89.57	67.71	69.1	109.34	83.43	95.09	99.61	127.6	-0.190761	2.52752e-44	-0.855557	0	-0.486178	1.9854e-248	0.664795	0	0.369379	2.38777e-107	0.295416	1.96076e-87
CL326.Contig24_All	7.42	5.09	5.28	35.91	47.42	54.46	26.99	99.88	75.58	3.43	3.83	4.42	-0.602524	2.11248e-32	2.95429	0	3.52088	0	-3.55682	0	0.566588	0	-4.12341	0
CL6234.Contig2_All	25.57	29.35	30.87	34.89	31.66	31.7	31.36	37.91	33.5	18.53	31.52	28.41	-0.122746	4.70314e-07	0.198436	7.34703e-17	0.269889	3.33533e-30	-0.321183	4.29843e-40	0.0714529	0.00070144	-0.392635	1.11562e-59
CL5959.Contig3_All	28.21	28.24	13.44	36.59	61.51	45.37	27.43	33.06	39.28	9.91	14.07	25.47	-0.48881	2.43091e-50	1.03971	0	0.5234	5.68011e-80	-1.52852	0	-0.516309	1.19776e-110	-1.01221	5.58624e-250
CL5873.Contig3_All	1.04	0.66	0.49	0.57	0.87	0.96	0.37	0.65	0.25	0.4	0.52	0.19	-0.985884	6.33782e-08	0.130501	0.109235	-0.778838	8.6412e-06	-1.11638	3.11101e-10	-0.909339	1.60887e-07	-0.207046	0.0878817
CL2291.Contig7_All	0.36	0.67	0.5	0.95	0.36	0.48	0.43	0.85	1.19	0.49	1	0.96	0.680375	1.67648e-05	0.227146	0.0605621	0.693307	1.5282e-05	0.453228	0.000941276	0.466161	0.00139983	-0.0129321	0.21843
CL8537.Contig8_All	16.58	12.44	16.76	25.47	15.43	16.08	10.77	16.8	26.1	5.94	21.91	19.11	0.0533219	0.077142	0.322668	5.20979e-11	0.246782	5.25099e-07	-0.269346	1.13418e-08	-0.075886	0.034316	-0.19346	4.19032e-05
CL5183.Contig14_All	5.28	6.67	8.47	2.34	1.96	1.56	0.58	0.62	0.73	1.5	4.37	2.97	-1.20302	1.26351e-74	-1.80028	1.67866e-133	-3.39994	6.64311e-271	0.597255	9.19461e-12	-1.59967	1.19208e-33	2.19692	3.35037e-76
Unigene48952_All	0.76	0.32	0.61	0.49	0.17	0.5	0.17	0.24	0.17	0.3	0.57	0.46	-0.33991	0.0676286	-0.547359	0.0261121	-1.52792	2.21506e-05	0.207449	0.086235	-0.980565	0.00615066	1.18801	0.000980565
CL160.Contig71_All	1.63	1.41	0.78	1.56	1.81	1.1	0.87	1.41	0.93	0.6	0.63	1.37	-0.515803	0.0292	0.239054	0.108459	-0.20799	0.141592	-0.754857	0.00272476	-0.447043	0.0385318	-0.307813	0.0926055
Unigene64971_All	0.45	0.37	0.51	0.57	0.24	0.46	0.17	0.26	0.25	0.18	0.32	0.45	-0.479819	0.0039424	-0.0620161	0.184761	-0.981568	1.68719e-06	-0.417803	0.00596554	-0.919552	7.85843e-06	0.501749	0.00879551
CL11378.Contig6_All	0	0	0	3.97	3.18	2.44	1.2	2.83	1.79	1.27	2.44	2.44	9.10228	1.09686e-52	9.73673	8.71884e-74	9.0281	4.53129e-50	-0.634449	2.41784e-09	-0.708631	1.6886e-10	0.0741823	0.137966
CL6237.Contig6_All	0.93	0.43	0.74	0.22	0.61	0.58	0.8	1.55	0.91	0.86	0.81	0.82	0.240378	0.00860343	-0.575396	2.96978e-06	0.643722	2.79116e-10	0.815775	6.41803e-12	1.21912	1.26126e-26	-0.403344	1.833e-05
Unigene24620_All	0.1	0.17	0.09	0.09	0.05	0.1	0.03	0.08	0.04	0	0	0	-5.80603	1.97873e-08	-0.571296	0.0538249	-1.26167	0.00350666	-5.23474	1.89171e-06	-0.690377	0.0577143	-4.54436	0.000219882
CL10455.Contig2_All	0.69	0.6	0.36	0.93	1.12	0.93	0.27	0.72	0.61	0.26	0.29	0.34	-0.910681	1.67834e-07	0.848528	9.39694e-11	-0.0462115	0.206281	-1.75921	2.74863e-30	-0.894739	1.55688e-11	-0.864469	8.19972e-07
CL13147.Contig3_All	0.52	0.72	0.63	0.93	0.55	0.26	0.46	0.41	0.77	0.61	0.48	1.02	0.181348	0.080448	-0.0989587	0.157358	-0.185251	0.101463	0.280307	0.0228003	-0.0862923	0.170404	0.366599	0.0154525
CL6944.Contig9_All	3.59	2.02	2.64	2.4	2.73	3.54	0.41	1.65	1.77	0.64	1.53	0.78	-1.47873	1.66568e-65	0.0713759	0.0798981	-1.09576	2.36255e-41	-1.55011	8.14011e-74	-1.16713	1.10732e-47	-0.382972	9.97661e-05
CL2297.Contig5_All	48.63	66.86	63.79	21.48	23.91	26.04	14.83	17.35	20.92	24.96	29.88	61.62	-0.612245	1.61738e-195	-1.32505	0	-1.74593	0	0.712805	6.46983e-168	-0.420877	2.12212e-40	1.13368	0
CL12300.Contig1_All	2.82	1.98	1.82	2.61	3.7	3.41	2.09	2.83	2.46	1.02	1.58	1.34	-0.7487	3.60413e-23	0.554224	5.03674e-20	0.163246	0.00450914	-1.30292	4.16132e-80	-0.390977	2.34054e-11	-0.911946	4.40683e-35
CL10970.Contig5_All	0.68	0.38	0.29	0	0	0	0	0	0	0	0	0	-7.05766	8.09947e-17	-7.0417	1.14432e-16	-7.03183	1.28772e-16
CL14866.Contig11_All	0.78	0.65	0.77	0.76	0.83	0.6	0.87	0.57	0.93	0.2	0.68	0.88	-0.320558	0.00334094	-0.0110172	0.227067	0.107748	0.105693	-0.309541	0.00270882	0.118765	0.0873361	-0.428306	0.000198642
CL4395.Contig1_All	3.12	2.11	2.46	2.59	1.82	2.11	2.12	1.78	2.25	0.52	2.12	2.42	-0.599039	2.80267e-20	-0.233961	6.02077e-05	-0.317735	1.91259e-07	-0.365078	2.07676e-08	-0.0837746	0.057862	-0.281303	1.90639e-05
CL9316.Contig3_All	11.73	24.21	10.98	3.62	7.19	6.67	2.13	4.7	1.65	2.31	3.61	5.99	-1.97144	0	-1.42457	0	-2.45595	0	-0.546873	3.22686e-27	-1.03138	3.21891e-76	0.484506	1.41503e-15
CL6276.Contig1_All	4.03	3.37	4.52	4.11	2.45	3.14	1.45	4.56	3.75	3.71	8.43	5.63	0.580442	2.07985e-23	-0.294948	7.06854e-06	-0.275934	2.37465e-05	0.87539	2.72592e-46	0.0190141	0.198053	0.856376	3.53341e-44
CL2447.Contig1_All	1.17	0.83	1.2	0.7	1.37	1.53	0.38	0.76	1.14	0.59	1.59	0.93	-0.037307	0.181644	0.174678	0.0579411	-0.474407	0.000751325	-0.211985	0.0210189	-0.649085	5.3394e-06	0.4371	0.00145865
Unigene44528_All	3.19	3.07	3.48	3.4	3.64	2.89	1.38	2.28	2.44	1.16	2.03	1.13	-1.16994	3.56015e-85	0.0273054	0.150259	-0.667311	8.58822e-34	-1.19724	3.32115e-90	-0.694617	1.04273e-36	-0.502626	4.8536e-14
CL13799.Contig3_All	1.33	2.52	1.23	4.01	3.28	2.22	4.78	8.42	5.7	0.4	0.68	0.6	-1.59519	9.75437e-68	0.905306	5.70133e-52	1.90331	0	-2.5005	1.39522e-223	0.998008	4.23741e-119	-3.49851	0
CL9669.Contig1_All	1.6	0.67	1.08	3.5	3.77	2.93	4.42	2.68	3.52	0.78	1.56	0.83	-0.059909	0.176585	1.61454	8.13297e-27	1.68418	1.38905e-29	-1.67445	1.17262e-28	0.0696366	0.142292	-1.74408	3.60035e-31
CL16786.Contig13_All	1.8	0.88	1.7	4.45	2.36	2.91	2.43	4.36	3.43	1.07	2.7	2.24	0.460838	1.76098e-09	1.15354	8.72964e-62	1.23035	1.16939e-71	-0.692699	1.0299e-27	0.0768096	0.0509395	-0.769509	4.37714e-34
CL3588.Contig10_All	2.01	2.25	3.6	3.62	3.43	3.48	2.76	2.73	3.03	1.06	2.45	2.12	-0.478601	1.13576e-11	0.424352	2.85521e-12	0.12001	0.0215727	-0.902952	2.11731e-42	-0.304342	2.24014e-07	-0.59861	9.87869e-18
CL2132.Contig9_All	0.92	2.23	1.95	2.5	1.03	1.62	1.68	1.58	2.61	1.76	3.24	3.05	0.662765	1.55248e-19	0.0152487	0.211415	0.204641	0.00402498	0.647516	4.45075e-19	0.189393	0.00624578	0.458123	7.06355e-11
Unigene65601_All	0.75	0.96	0.61	0.79	1.06	1.39	0.7	1	0.96	0.26	0.47	0.28	-1.17124	4.97394e-06	0.490052	0.00525649	0.213039	0.0939111	-1.66129	4.49584e-12	-0.277013	0.0463009	-1.38428	4.24525e-08
CL4042.Contig14_All	4.22	4.61	1.96	5.19	4.22	4.2	2.87	2.83	4.85	2.18	3.23	4.03	-0.187702	4.79588e-05	0.339239	2.6758e-14	-0.0291176	0.153858	-0.526941	1.67717e-30	-0.368357	2.70431e-16	-0.158584	0.000476851
CL768.Contig30_All	1.88	2.08	1.82	3.14	3.47	1.43	1.79	3.09	2.08	0.74	2.47	1.32	-0.348443	1.52639e-05	0.477576	5.3737e-11	0.279122	0.000113972	-0.826019	1.34287e-26	-0.198454	0.00180344	-0.627565	5.46157e-15
Unigene7927_All	3.62	2.68	3.66	2.87	4.2	1.63	1.32	2	3.86	1.51	4.6	3.81	0.00608056	0.214497	-0.189735	0.0218146	-0.458846	1.32994e-05	0.195816	0.0107673	-0.269111	0.00610596	0.464926	8.53297e-06
CL4636.Contig6_All	0.68	0.94	0.77	1.1	0.66	1.13	1.25	0.45	0.91	0.52	0.92	1.04	0.0635663	0.135114	0.279334	0.00323671	0.125644	0.0774191	-0.215768	0.00749391	-0.15369	0.0430008	-0.0620777	0.141286
CL5788.Contig10_All	2.86	1.68	2.56	2.59	2.18	2.55	0.81	2.94	2.44	0.81	1.16	0.86	-1.32407	2.86727e-65	0.0459556	0.122349	-0.184144	0.001587	-1.37002	4.1659e-71	-0.2301	0.000124678	-1.13992	9.48856e-46
CL10923.Contig6_All	3.81	3.3	3.87	4.7	5.71	6.3	2.63	3.51	3.35	1.66	2.89	2.88	-0.560606	8.39011e-28	0.607221	4.66887e-47	-0.203882	1.2822e-05	-1.16783	9.84522e-141	-0.811103	1.29207e-76	-0.356724	1.30945e-11
Unigene42202_All	5.06	2.66	4.46	3.91	2.06	2.75	4.09	3.96	6.74	1.95	2.42	2.76	-0.767319	1.44904e-50	-0.479117	1.0911e-22	0.283069	2.84039e-11	-0.288202	6.21075e-08	0.762185	1.12129e-59	-1.05039	5.07874e-102
CL13730.Contig1_All	2.66	4.07	1.79	6.87	4.98	6.29	7.17	5.38	4.75	3.05	4.79	4.74	0.573908	3.38484e-10	1.09427	1.08473e-37	1.03446	4.01716e-33	-0.520358	4.1253e-12	-0.0598102	0.110096	-0.460547	1.75016e-09
Unigene89241_All	0.65	0.26	0.27	0	0	0	0	0	0	0.26	0.38	0.24	-0.376269	0.14328	-4.16767	0.00114411	-4.1578	0.00123297	3.7914	0.00219735			3.78153	0.0037432
Unigene25708_All	10.12	9.01	7.47	9.13	13.27	14.82	5.5	9.46	10.91	4.18	6.92	7.2	-0.53194	6.84701e-29	0.48656	9.35457e-34	-0.0301885	0.140955	-1.0185	3.70113e-119	-0.516749	2.89705e-37	-0.501751	1.5745e-25
CL9774.Contig2_All	0.63	1.25	0.84	1.18	2.59	1.98	2.21	1.11	1.08	0.23	0.15	0.4	-1.79027	2.36066e-10	1.07882	4.45294e-10	0.706737	7.30949e-05	-2.86909	1.06277e-33	-0.372079	0.00586647	-2.49701	8.84266e-23
CL12756.Contig5_All	0.66	0.55	0.92	0.72	1.14	1.26	0.72	0.77	0.96	0.7	1.15	0.81	0.330896	0.00918466	0.558346	7.0613e-05	0.207455	0.0589985	-0.227451	0.0181832	-0.350891	0.0050714	0.123441	0.104744
CL822.Contig21_All	3.8	3.38	3.56	2.93	3.07	2.69	0.81	2.5	1.84	2.14	2.46	2.25	-0.643858	6.30929e-37	-0.302716	1.67829e-10	-1.04807	1.01343e-81	-0.341142	5.32519e-11	-0.74535	3.93966e-38	0.404208	1.92455e-11
CL3646.Contig9_All	1.65	2.04	1.29	0.76	1	1.49	0.79	1.03	1.01	0.83	1.42	1.5	-0.400367	1.11342e-05	-0.616158	3.54482e-10	-0.805078	4.01807e-15	0.215791	0.00781689	-0.188919	0.0307728	0.40471	9.28592e-05
CL13248.Contig2_All	0.82	0.76	0.47	1.38	1.67	1.37	0.73	1.32	1.05	0.08	0.3	0.21	-1.77156	1.31283e-12	1.11466	2.75781e-13	0.613896	0.000114494	-2.88622	6.28883e-44	-0.500765	0.000129011	-2.38545	9.30053e-26
CL16925.Contig30_All	1.94	1.18	1.8	2.06	1.9	1.83	0.52	1.04	0.93	0.22	0.9	0.6	-1.51428	8.78483e-39	0.237377	0.00215961	-0.968432	6.82108e-20	-1.75166	9.76776e-56	-1.20581	3.75211e-32	-0.545848	3.04378e-05
Unigene24336_All	12.77	11.88	5.8	9.7	13.67	10.85	2.46	6.79	8.76	1.61	4.56	3.41	-1.66439	2.10968e-267	0.17045	4.77697e-07	-0.748319	7.68125e-75	-1.83484	0	-0.91877	2.25883e-118	-0.91607	1.26877e-63
CL1438.Contig2_All	2.35	1.38	1.8	1.99	1.35	2.1	3.89	1.89	3.64	3.82	3.84	4.21	1.11163	7.805e-30	-0.0205074	0.21363	0.776436	7.57005e-14	1.13213	6.18872e-31	0.796944	2.22212e-14	0.335189	3.87955e-05
CL1988.Contig100_All	0.35	0.1	0.23	0.32	0.27	0.14	0.23	0.12	0.33	0.15	0.15	0.22	-0.365143	0.0316113	0.0986385	0.166799	0.0122918	0.250334	-0.463781	0.00781819	-0.0863467	0.175987	-0.377434	0.0299979
CL1630.Contig2_All	3.17	2.88	3.35	2.14	1.22	1.33	1.11	2.14	1.25	0.66	1.52	1.7	-1.27216	2.37049e-89	-0.998317	1.08589e-60	-1.05345	6.24502e-66	-0.273846	6.36418e-05	-0.0551368	0.121565	-0.218709	0.00143879
CL16447.Contig2_All	2.28	1.63	1.81	3.49	1.82	2.13	1.58	2.53	3.14	1.4	2.18	3.02	0.211956	0.00206115	0.381261	2.45668e-07	0.348772	2.44085e-06	-0.169304	0.00384872	-0.0324886	0.167363	-0.136816	0.018405
CL14778.Contig1_All	4.69	5.34	3.23	4.83	4.57	6.81	0.79	3	3.66	1.28	3.46	3.29	-0.721543	9.59664e-47	0.291201	3.68133e-12	-0.822599	1.41207e-57	-1.01274	7.34482e-100	-1.1138	1.12001e-114	0.101057	0.0238878
CL3351.Contig12_All	2.05	1.96	1.37	2.12	1.91	1.79	0.9	2.15	1.76	0.75	1.37	1.05	-0.756165	5.43147e-29	0.116514	0.0150184	-0.150261	0.00530412	-0.872678	1.00792e-39	-0.266775	4.41662e-06	-0.605903	2.5498e-18
CL1707.Contig4_All	4.04	2.74	3.66	3.31	3.38	4.53	4.83	4.73	5.93	1.28	3.02	4.28	-0.275803	1.70087e-05	0.105463	0.0296377	0.57642	5.66518e-23	-0.381266	2.4368e-09	0.470957	1.91207e-16	-0.852223	4.64277e-44
Unigene38645_All	0.95	1.71	0.76	2.26	1.83	3.2	1.94	3.39	3.48	0.92	1.28	2.07	0.332752	0.0117936	1.09698	1.1679e-14	1.38269	3.11501e-24	-0.764225	3.75591e-09	0.285713	0.0040541	-1.04994	1.85822e-16
CL16513.Contig3_All	1.16	0.88	0.74	0.71	1.31	1.29	0.43	0.62	0.36	0.25	0.53	0.52	-1.08509	1.56481e-21	0.255182	0.00186263	-0.957002	1.23605e-17	-1.34028	7.32206e-35	-1.21218	1.85884e-29	-0.128091	0.089946
CL5056.Contig3_All	3.37	2.39	2.59	2.36	2.29	3.22	1.02	2.47	2.44	1.17	2.33	1.74	-0.669958	9.47473e-41	-0.0836997	0.020779	-0.485512	2.20725e-23	-0.586258	4.43382e-31	-0.401813	3.80397e-16	-0.184445	0.000276064
CL1556.Contig14_All	3.81	1.79	3.95	1.8	0.73	1.67	1.9	1.68	3.02	2.08	1.32	2.64	-0.654173	6.57955e-16	-1.18074	1.48525e-39	-0.526975	3.17731e-11	0.526567	3.8764e-08	0.653765	2.0216e-11	-0.127198	0.0435162
CL9320.Contig6_All	2.26	1.86	1.06	1.79	1.48	1.45	2.11	2.16	1.28	0.93	2.34	1.81	-0.015472	0.205834	-0.127387	0.0989393	0.115547	0.113083	0.111915	0.0685618	0.242934	0.0234834	-0.131019	0.0854363
CL5789.Contig3_All	3.93	2.97	2.69	6.81	4.37	6.08	3.68	5.93	5.92	1.67	2.97	4	-0.142833	0.0198177	0.851612	3.12694e-37	0.706371	6.35445e-25	-0.994444	2.14926e-48	-0.145241	0.00502179	-0.849204	8.69668e-34
CL9523.Contig2_All	2.35	1.27	1.11	0.78	0.68	1.25	0.57	1.6	1.33	0.43	1.29	1.62	-0.498305	8.19549e-09	-0.800213	8.3332e-18	-0.426683	6.01432e-07	0.301908	0.000615292	0.37353	9.23226e-05	-0.0716219	0.115717
Unigene15519_All	1.09	1.21	0.74	1.92	2.04	1.89	1.69	0.69	1.39	0.61	0.57	0.6	-0.767956	2.41982e-05	0.947462	2.11677e-11	0.317126	0.0162212	-1.71542	2.45665e-26	-0.630336	1.67262e-06	-1.08508	1.30234e-09
CL7400.Contig7_All	3.27	2.05	2.5	2.25	2.98	4.25	1.02	2.62	2.91	0.79	2.05	1.18	-0.957441	3.77644e-54	0.280931	1.05414e-08	-0.244706	4.0504e-06	-1.23837	1.68957e-98	-0.525637	8.20592e-24	-0.712735	2.26181e-28
Unigene10656_All	0.58	0.28	0.36	0.39	0.33	0.33	0.32	0.27	0.47	0.33	0.27	0.36	-0.347199	0.00877959	-0.208907	0.0535203	-0.204322	0.060104	-0.138292	0.066293	0.00458538	0.238144	-0.142877	0.100873
CL6547.Contig13_All	0.55	0.74	0.8	0.54	0.54	0.54	0.76	0.53	0.61	0.67	1.85	1.45	0.934393	1.02604e-08	-0.364806	0.0256808	-0.12136	0.154797	1.2992	8.93842e-14	0.243446	0.0734063	1.05575	3.45936e-10
CL3615.Contig9_All	9.86	7.59	11.96	11.81	7.54	8.21	10.46	8.5	13	8.88	14.32	14.86	0.38363	3.69539e-13	-0.0887433	0.0384236	0.13172	0.00685549	0.472373	1.05279e-18	0.220463	4.79594e-05	0.25191	6.56688e-07
CL12531.Contig1_All	6.45	3.3	5.25	3.75	3.58	4.66	0.75	2.93	2.46	1.31	1.73	1.49	-1.72532	1.6294e-206	-0.320911	2.69189e-13	-1.27615	1.97145e-131	-1.40441	2.007e-123	-0.95524	1.23985e-66	-0.449168	9.32485e-11
CL8051.Contig3_All	473.22	700.56	646.82	641.72	429.4	466.19	372.93	577.28	486.67	540.31	680.01	694.39	0.0795056	1.07175e-46	-0.240456	0	-0.33038	0	0.319962	0	-0.0899239	4.99712e-47	0.409885	0
Unigene7526_All	4.34	5.46	4.83	4.53	4.58	3.27	2.06	3.55	2.57	3.54	5.47	4.37	-0.124354	0.0131441	-0.238191	7.96055e-05	-0.82821	1.09849e-31	0.113837	0.0142472	-0.590019	9.21092e-16	0.703856	1.21392e-22
CL2547.Contig5_All	0.46	0.66	0.49	0.73	0.73	1.09	0.46	0.52	0.37	0.12	0.47	0.29	-0.864265	1.73257e-07	0.667287	1.82892e-07	-0.250341	0.0339755	-1.53155	2.43116e-24	-0.917628	1.45373e-11	-0.613924	0.000216806
CL13522.Contig10_All	2.5	2.52	2.12	2.59	4.02	3.76	1.82	2.05	2.8	0.71	1.41	1.49	-0.982656	1.55639e-62	0.53853	1.64522e-32	-0.094008	0.0215411	-1.52119	2.76629e-177	-0.632538	1.4602e-42	-0.888648	1.15941e-49
CL2028.Contig4_All	2.53	4.86	1.63	3.6	3.62	2.35	2.37	3.71	1.49	2.24	1.2	2.75	-0.536346	4.41541e-13	0.0873059	0.0571698	-0.240116	0.000333729	-0.623651	9.83762e-18	-0.327422	1.66565e-06	-0.29623	6.03822e-05
CL2213.Contig5_All	0.02	0.09	0.07	0.28	0.32	0.16	0.17	0.11	0.22	0.13	0.25	0.23	1.68476	2.78211e-05	2.03742	1.88391e-07	1.41407	0.000648651	-0.352661	0.0402591	-0.623343	0.0154206	0.270683	0.107232
CL11589.Contig1_All	0.34	0.34	0.09	0.48	0.75	0.52	0.46	0.23	0.61	0.42	0.55	0.33	0.773138	0.00724761	1.1924	8.37055e-05	0.766717	0.00943692	-0.419259	0.0232797	-0.42568	0.039375	0.00642037	0.228464
CL7226.Contig5_All	2.09	0.81	2.28	2.76	3.73	3.41	1.39	1.87	1.08	0.79	1.59	0.59	-0.794358	6.61844e-10	0.937134	5.24256e-22	-0.242757	0.0147123	-1.73149	9.60514e-55	-1.17989	4.73633e-31	-0.551601	2.29836e-05
CL1306.Contig44_All	2.92	2.68	2.91	1.31	0.75	1.09	0.55	1.26	1.69	3.15	4.56	3.78	0.435677	2.99214e-17	-1.43	9.08979e-88	-1.27487	1.12709e-73	1.86568	2.64057e-173	0.155133	0.0265166	1.71055	4.37784e-153
CL398.Contig10_All	0.6	0.82	0.2	0.47	1.24	1.13	0.1	0.36	0.42	0.07	0.05	0.04	-3.32864	1.03175e-98	0.806407	1.59005e-25	-0.884398	1.21686e-17	-4.13505	9.23249e-200	-1.69081	5.03592e-78	-2.44425	3.90105e-40
CL7262.Contig5_All	5.15	5.8	5.9	9.26	9.71	7.77	7.27	7.06	7.83	3.92	6.9	6.06	0.0110207	0.195823	0.669807	4.54736e-33	0.404624	3.39377e-12	-0.658787	1.05868e-32	-0.265183	2.02406e-07	-0.393604	8.80982e-12
CL2939.Contig7_All	0.29	0.6	0.41	0.56	0.56	0.21	0.12	0.22	0.32	0.4	0.68	0.34	0.135235	0.0942533	0.0437345	0.195494	-0.972328	1.10371e-07	0.0915009	0.0882699	-1.01606	2.52232e-08	1.10756	6.55049e-10
Unigene69172_All	1.13	1.58	1.86	2.94	1.86	0.97	4.13	2.1	2.16	1.65	3.28	3.08	0.815496	3.13411e-19	0.340407	0.000258065	0.880434	2.82511e-22	0.475089	9.78672e-09	0.540027	1.81588e-10	-0.064938	0.105495
Unigene56448_All	4.02	4.85	4.84	3.49	2.18	4.53	1.69	2.22	3	2.57	2.17	2.47	-0.922444	7.0517e-50	-0.424582	7.41699e-14	-0.983545	9.92474e-55	-0.497863	3.11997e-14	-0.558963	1.46163e-16	0.0611006	0.105181
CL11244.Contig1_All	24.58	32.54	22.93	51.03	40.42	44.2	38.51	44.8	41.58	8	19.83	30.68	-0.439036	6.24239e-35	0.765153	3.59648e-153	0.655096	3.05253e-108	-1.20419	0	-0.110057	1.05314e-05	-1.09413	3.16287e-258
Unigene38547_All	4.31	4.57	3.34	5.42	5.7	5.72	4.21	5.66	4.68	2.18	4.09	3.44	-0.321912	7.71485e-05	0.466186	4.85824e-10	0.2652	0.000325224	-0.788098	2.85124e-23	-0.200986	0.00213143	-0.587112	9.3024e-13
CL1595.Contig47_All	4.5	5.22	5.03	6.29	4.04	5.48	4.6	4.6	8.53	4.35	9.44	7.16	0.510306	4.89814e-26	0.103698	0.0152012	0.270739	5.33243e-08	0.406608	4.76116e-18	0.16704	0.000334972	0.239567	1.11723e-07
Unigene35187_All	0.44	0.23	0.25	0.64	0.58	0.75	0.5	0.51	0.51	0.1	0.16	0.21	-0.964456	2.81756e-05	1.09767	7.64461e-11	0.729183	2.94161e-05	-2.06213	4.62006e-25	-0.368492	0.00514203	-1.69364	2.05285e-15
CL6425.Contig4_All	2.25	2.13	2.36	2.95	3.06	2.5	3.17	3.04	2.75	1.07	2.64	1.93	-0.249434	0.00375111	0.337455	7.6686e-05	0.421339	1.10135e-06	-0.586889	1.1294e-10	0.0838842	0.0887758	-0.670773	2.61691e-13
Unigene21045_All	41.03	29.37	41.42	4.75	2.1	3.39	1.66	2.36	3.38	32.51	64.01	50.74	0.40357	2.76886e-84	-3.4438	0	-3.90909	0	3.84737	0	-0.465284	3.41012e-09	4.31266	0
CL2472.Contig2_All	4.51	10.53	4.09	4.23	7.26	5.97	2.18	6.99	7.5	1.9	2.68	3.49	-1.23865	3.92734e-102	-0.131167	0.00222423	-0.187857	4.65198e-05	-1.10748	9.69736e-79	-0.0566902	0.0721576	-1.05079	3.60597e-69
CL1033.Contig15_All	0.27	0.37	0.41	0.31	0.63	0.54	0.57	0.43	0.45	0.15	0.21	0.19	-0.953085	2.27663e-09	0.490275	4.99058e-05	0.456577	0.000159874	-1.44336	1.7882e-22	-0.0336978	0.194514	-1.40966	6.20022e-21
CL15087.Contig2_All	5.09	4.35	3.52	6.15	6.64	4.76	2.89	3.79	4.29	2.12	4.21	5.17	-0.163549	0.00602081	0.441121	2.31199e-12	-0.229676	0.00054236	-0.60467	5.76616e-21	-0.670797	3.587e-24	0.0661268	0.0955233
CL4468.Contig21_All	5.31	7.37	6.64	9.95	6.66	9.73	8.83	11.52	11.91	5.83	10.49	11.73	0.54295	4.37724e-46	0.449704	5.24465e-31	0.746842	1.03545e-90	0.093246	0.00163093	0.297138	2.98613e-18	-0.203892	6.43769e-10
Unigene38329_All	1.48	1.03	1.19	1.52	1.76	1.72	0.39	1.14	0.74	0.43	0.52	0.66	-1.1926	4.79294e-22	0.436684	1.56665e-06	-0.688124	9.98647e-10	-1.62929	7.30507e-46	-1.12481	2.36474e-26	-0.504481	0.000121231
CL984.Contig60_All	5.97	11.1	6.67	7.82	6.69	7.08	7.85	10.98	11.28	4.67	7.25	12.14	0.0227872	0.0975702	-0.135771	4.0668e-07	0.347481	1.054e-42	0.158559	1.84828e-09	0.483252	4.46724e-77	-0.324693	5.05192e-38
CL6053.Contig1_All	9.29	9.73	8.33	13.31	17.04	20.43	6.48	10.01	8.21	4.49	8.21	7.22	-0.445078	1.22187e-11	0.896349	3.30954e-64	-0.130392	0.0138138	-1.34143	1.27488e-122	-1.02674	1.21234e-79	-0.314686	1.7659e-06
Unigene1293_All	3.14	2.4	3.74	2.1	3.02	3.1	4.51	3.69	2.37	1.77	3.98	3.23	-0.04007	0.148095	-0.173487	0.0131873	0.196785	0.00492981	0.133417	0.0203788	0.370272	2.98725e-06	-0.236855	0.00104624
CL12031.Contig1_All	3.94	3.58	3.09	3.25	4.96	4.78	1.87	3.05	2.65	1.22	2	1.79	-1.07912	4.90294e-80	0.292364	5.11266e-11	-0.479939	1.08217e-20	-1.37148	7.77919e-142	-0.772303	1.01945e-55	-0.59918	3.31933e-22
CL4338.Contig20_All	2.26	2.28	1.61	2.98	3.41	5.06	1.13	3.39	3.5	0.79	1.24	0.67	-1.18068	2.81356e-62	0.89823	3.18852e-73	0.392482	3.07016e-13	-2.07891	9.5649e-258	-0.505748	1.2393e-27	-1.57316	3.56851e-124
CL11957.Contig2_All	1	0.57	0.52	0.59	0.92	1.08	0.66	1.22	1.13	0.21	0.32	0.42	-1.12189	4.61966e-10	0.311464	0.00998707	0.542696	3.88719e-05	-1.43335	5.30636e-17	0.231232	0.0243472	-1.66459	1.86859e-23
Unigene1039_All	9.66	3.28	10.61	2.77	4.42	6.78	1.28	4.32	4.41	2.41	4.77	2.05	-1.34898	3.03142e-145	-0.752389	2.50138e-56	-1.22288	8.68812e-124	-0.596587	8.59454e-24	-0.470495	1.01489e-15	-0.126092	0.0157272
CL4596.Contig1_All	0.83	1.24	0.37	1.1	1.34	1.56	0.61	2.08	1.25	0.78	1.04	1.24	0.345328	0.0147486	0.723908	6.73618e-06	0.711901	1.0384e-05	-0.37858	0.00305086	-0.0120068	0.229121	-0.366573	0.00633383
Unigene23094_All	3.81	2.71	4.15	3.33	2.69	2.88	2.45	2.78	1.91	2.59	3.31	3.59	-0.162238	0.00589618	-0.258521	0.00011092	-0.569472	2.00564e-14	0.0962823	0.031777	-0.310952	3.26613e-05	0.407234	5.51598e-08
CL1574.Contig1_All	7	7.25	5.03	4.81	7.85	5.34	3.14	4.89	6.53	3.01	3.55	2.67	-1.05754	8.9068e-51	-0.0980148	0.0313716	-0.395086	2.4964e-10	-0.95953	4.47318e-41	-0.297072	1.91369e-06	-0.662458	1.51566e-18
CL8509.Contig2_All	1.76	1.63	2.14	3.3	2.49	2.63	2.99	2.41	1.67	1.11	2.21	1.93	-0.0674334	0.139038	0.610148	1.57189e-08	0.366005	0.000604038	-0.677582	2.92411e-10	-0.244143	0.00637996	-0.433439	7.29932e-05
Unigene50460_All	1698.98	398.95	1185.83	169.24	396.72	563.02	150.13	337.54	331.26	274.97	591.23	338.8	-1.43663	0	-1.53783	0	-1.9869	0	0.101193	4.85618e-30	-0.449071	0	0.550264	0
CL9536.Contig3_All	2.05	2.68	1.86	4.29	3.94	2.98	2.91	3.48	3.43	1.22	2.12	2.24	-0.23588	0.00165675	0.769398	2.02335e-27	0.582627	1.52922e-15	-1.00528	1.15987e-42	-0.186771	0.00140575	-0.818507	6.2238e-27
CL16031.Contig3_All	0.11	0.33	0.16	0.85	0.81	1.03	0.37	0.96	0.66	0.25	0.27	0.43	0.647622	0.00412075	2.13649	5.58372e-26	1.71195	3.59043e-15	-1.48886	6.14938e-17	-0.424538	0.00187336	-1.06433	2.35329e-08
Unigene26846_All	0.53	0.3	0.14	0.24	0.16	0.2	0.17	0.14	0.05	0.31	0.34	0.08	-0.405549	0.0192217	-0.701793	0.00109175	-1.44596	3.81223e-08	0.296245	0.0405584	-0.744167	0.00497031	1.04041	0.000110573
CL2990.Contig13_All	0.68	0.43	0.79	0.2	0.23	0.09	0.19	0.22	0.22	0.8	1.72	0.97	0.877435	1.21972e-11	-1.88689	5.35868e-19	-1.58847	2.85686e-15	2.76432	2.34829e-52	0.298421	0.0814194	2.4659	5.89333e-46
CL16482.Contig5_All	0.91	0.92	0.8	1.18	1.3	1.44	1.4	1.22	1.05	0.53	1.82	0.97	0.349024	1.70498e-06	0.584552	8.0871e-16	0.491977	2.22007e-11	-0.235528	0.000128139	-0.0925747	0.0498894	-0.142953	0.0122492
Unigene54237_All	18.64	21.95	20.51	16.4	13.98	14.99	22.65	22.48	19.18	25.23	27.27	30.33	0.447487	2.77124e-45	-0.426097	1.01447e-30	0.0847812	0.00464588	0.873584	9.44507e-145	0.510879	2.40364e-44	0.362705	4.20878e-31
CL11817.Contig3_All	2.95	2.55	5.01	1.28	2.02	2.16	0.76	2.63	1.35	1.57	1.34	2.51	-0.949756	3.26106e-46	-0.944645	1.7986e-45	-1.13681	9.10631e-61	-0.00511086	0.145442	-0.192163	0.00636672	0.187052	0.00673278
CL7866.Contig2_All	0.46	0.59	0.27	1.04	1.11	0.97	0.68	0.86	0.84	0.12	0.26	0.4	-0.744284	0.000636956	1.24857	1.36503e-13	0.862083	1.1191e-06	-1.99285	1.92855e-25	-0.386486	0.00308485	-1.60637	4.7474e-15
Unigene12641_All	0.26	0.46	0.63	0.27	0.42	0.32	0.44	0.45	0.4	0.32	1.31	1	0.952857	6.73842e-21	-0.419982	0.000484886	-0.0660184	0.164443	1.37284	3.14319e-36	0.353964	0.00264715	1.01888	5.36752e-23
CL7223.Contig3_All	7.68	2.86	7.65	4.83	4.64	5.66	5.29	3.37	2.51	2.5	5.38	4.07	-0.60057	1.19049e-23	-0.263764	1.69964e-06	-0.697138	6.97086e-30	-0.336806	2.3304e-08	-0.433374	1.04084e-11	0.0965685	0.0434276
CL9170.Contig1_All	0.32	0.1	0.29	0.19	0.32	0.13	0.13	0.22	0.42	0.16	0.22	0.19	-0.303205	0.12313	-0.135246	0.191539	0.137657	0.20197	-0.16796	0.113015	0.272903	0.141228	-0.440863	0.0856296
CL1294.Contig5_All	4.14	3.81	2.63	5.46	8.46	7.1	1.09	3.15	2.57	1.1	2.26	1.43	-1.13268	4.69202e-20	0.996024	5.65765e-31	-0.614322	3.90539e-08	-2.12871	1.4683e-92	-1.61035	4.91271e-63	-0.518362	7.02076e-05
CL2204.Contig70_All	0.13	0.24	0.09	0.11	0.05	0.08	0.29	0.13	0.23	0.36	0.64	0.25	1.44898	5.92438e-10	-0.900855	0.00430236	0.519327	0.0219083	2.34984	1.15695e-17	1.42018	7.51922e-06	0.929655	8.62292e-06
CL4242.Contig7_All	8.33	8.45	5.57	7.35	7.09	6.72	5.34	4	5.24	3.77	4.97	4.07	-0.797076	1.2178e-46	-0.0753798	0.0380934	-0.610248	1.48255e-29	-0.721696	6.47019e-38	-0.534868	1.53064e-22	-0.186828	0.000902773
CL2538.Contig14_All	172.75	98.09	195.72	55.15	25.67	40.57	15.64	28.66	31.97	100.3	233.05	161.11	0.0880352	1.45833e-21	-1.93862	0	-2.60379	0	2.02666	0	-0.665166	1.13075e-224	2.69182	0
CL6221.Contig4_All	29.29	18.24	27.28	42.16	32.22	32.8	45.32	38.6	52.31	18.26	36.39	21.3	0.0304372	0.091107	0.523183	6.47786e-64	0.875779	6.15087e-198	-0.492746	3.56013e-58	0.352596	7.91779e-40	-0.845342	2.13232e-187
CL13319.Contig2_All	224.18	163.87	202.43	411.1	491.32	466.58	204.22	332.75	391.27	97.01	167.04	128.19	-0.57754	0	1.21805	0	0.66973	0	-1.79559	0	-0.548316	0	-1.24727	0
CL4003.Contig23_All	0.81	0.42	0.44	0.57	0.48	0.74	0.24	0.43	0.42	0.2	0.39	0.31	-0.89057	5.43815e-12	0.105866	0.0938678	-0.619527	4.15495e-07	-0.996435	2.96758e-15	-0.725392	2.32977e-09	-0.271043	0.0187558
Unigene77954_All	4.31	2.39	2.9	3.44	5.94	5.89	1.72	5.38	6.4	0.67	2.21	1.56	-1.10191	3.06657e-19	0.672938	1.0115e-13	0.50816	3.47187e-08	-1.77485	7.08779e-59	-0.164778	0.015828	-1.61007	9.4464e-46
CL785.Contig12_All	18.43	22.85	14.89	37.31	34.05	22.06	27.48	32.23	25.87	10.49	25.2	34.69	0.339812	1.86068e-17	0.73904	1.15832e-85	0.623257	6.38911e-59	-0.399228	7.00425e-30	-0.115783	0.000261746	-0.283445	3.02517e-15
CL964.Contig2_All	0.42	1.07	0.86	1.26	1.69	0.6	1.28	0.82	1.37	0.82	1.34	1.38	0.597284	8.77292e-06	0.598445	1.02856e-05	0.567546	3.05001e-05	-0.00116128	0.150996	-0.0308995	0.202024	0.0297383	0.19432
CL6295.Contig4_All	4.28	2	4.74	2.69	3.2	3.98	3.33	3.92	3.84	2.65	4.46	4.6	0.0953992	0.0454089	-0.157999	0.010322	0.0172607	0.216193	0.253398	9.28566e-05	0.17526	0.00583122	0.0781384	0.070581
Unigene7021_All	3.21	3.42	7.14	9.23	5.84	3.75	4.8	7.5	6.99	2.76	1.87	2.58	-0.924857	3.64738e-27	0.456687	1.01174e-11	0.499943	8.27584e-14	-1.38154	3.88018e-68	0.0432553	0.130477	-1.4248	8.79033e-73
Unigene33540_All	1.6	1.56	1.72	3.27	1.63	2.33	2.46	2.77	2.32	0.91	1.35	2.13	-0.142231	0.0592669	0.572437	2.44221e-08	0.641176	3.70277e-10	-0.714668	7.21543e-12	0.0687388	0.125003	-0.783407	8.58158e-14
CL11873.Contig1_All	1.05	2.12	1.06	2.24	0.99	2.04	3.07	3.51	3.79	0.75	1.39	1.59	-0.170515	0.0794658	0.31907	0.0135263	1.30756	3.53351e-23	-0.489585	0.000485107	0.988492	1.95626e-15	-1.47808	1.02403e-27
CL2346.Contig31_All	0.3	0.9	0.46	0.39	0.45	0.25	0.8	0.63	0.66	0.12	0.21	0.06	-2.07559	1.20227e-19	-0.604991	0.000291109	0.331873	0.0104051	-1.4706	2.39306e-09	0.936864	1.71796e-08	-2.40746	1.64202e-28
Unigene61968_All	0.31	0.31	0.36	0.59	0.28	0.54	0.31	0.46	0.41	0.23	0.23	0.28	-0.403645	0.0656052	0.53569	0.0240788	0.287761	0.107102	-0.939335	0.000759983	-0.247929	0.10703	-0.691406	0.0124357
CL3223.Contig5_All	1.71	2.77	1.42	2.8	3.5	2.21	2.6	2.86	3.79	1.24	2.17	3.03	0.133534	0.016923	0.528702	1.34833e-15	0.653726	1.03144e-23	-0.395168	3.10145e-10	0.125024	0.0118899	-0.520192	1.79268e-16
CL10968.Contig2_All	6.93	3.86	7.42	6.97	11.1	15.25	4.84	5.74	4.26	1.34	3.49	2	-1.39852	6.17668e-40	0.877287	1.45848e-34	-0.2743	0.000708245	-2.27581	1.33899e-138	-1.15159	8.08923e-53	-1.12422	3.90244e-24
CL1479.Contig9_All	4.68	2.09	5.58	2.4	2.55	1.79	0.7	2.45	2.55	2.19	4.76	3.64	-0.217449	7.07828e-05	-0.87245	1.87095e-40	-1.10396	1.03413e-58	0.655001	1.68447e-22	-0.231511	0.00137033	0.886511	4.56663e-36
CL9820.Contig11_All	0.86	0.46	0.66	0.99	0.52	0.49	0.53	0.8	0.73	0.37	0.52	0.6	-0.409244	0.000584458	0.0116549	0.226462	0.0682035	0.160171	-0.420899	0.000264008	0.0565486	0.165243	-0.477448	8.59225e-05
Unigene3823_All	2.33	1.78	2.83	2.3	2.78	2.28	2.06	2.26	3.22	1.36	2.93	2.2	-0.0941	0.0654723	0.0869256	0.0792122	0.124301	0.0388749	-0.181026	0.00492927	0.0373751	0.16436	-0.218401	0.00236351
CL11342.Contig5_All	0.97	0.67	0.59	1.06	2.02	0.84	0.9	1.14	1.34	0.87	2.17	1.61	1.07488	4.25305e-13	0.821674	8.95775e-08	0.617657	6.91298e-05	0.253201	0.0093855	-0.204018	0.0449136	0.457219	0.000265034
CL5633.Contig2_All	2.67	2.18	1.98	2.21	2.88	2.82	2.31	2.53	2.24	1.02	2.69	2.03	-0.24838	8.73904e-06	0.215274	3.12955e-05	0.0585492	0.0887255	-0.463654	6.84012e-17	-0.156725	0.00135902	-0.306929	5.98033e-08
Unigene66532_All	0.82	1.07	0.39	1.83	1.33	1.52	0.56	1.35	1.39	0.37	0.75	0.77	-0.269908	0.0174352	1.04006	1.81591e-19	0.547697	6.84211e-06	-1.30997	8.55442e-28	-0.492361	1.47883e-06	-0.817605	2.95019e-10
Unigene40111_All	0.23	0.58	0.24	0.93	0.57	0.82	0.33	0.45	0.23	0.23	0.33	0.33	-0.183624	0.18229	1.15426	0.0127453	0.0121265	0.256619	-1.33788	0.00382458	-1.14213	0.0134675	-0.19575	0.18676
CL11014.Contig2_All	4.27	4.57	4.04	4.95	3.57	3.83	3.66	5.61	5.39	2.34	3.44	4.63	-0.300954	7.02274e-07	-0.0576152	0.094428	0.196006	0.00030417	-0.243339	2.87499e-05	0.253622	6.93553e-06	-0.49696	2.05048e-16
CL3997.Contig2_All	3.43	2.77	3.38	6.57	3.98	3.72	2.01	2.78	3.31	1.35	2.41	1.73	-0.800449	5.61296e-36	0.576534	3.81048e-30	-0.237681	2.15427e-05	-1.37698	3.19019e-125	-0.814215	1.58954e-53	-0.562768	2.47692e-17
CL4680.Contig6_All	1.23	0.46	0.81	0.28	0.46	0.32	0.31	0.33	0.48	0.52	0.8	0.8	-0.23054	0.034813	-1.24178	4.93158e-12	-1.14258	1.0068e-10	1.01124	2.13177e-08	0.0992024	0.168571	0.912038	4.03661e-07
CL906.Contig34_All	16.19	12.14	7.25	12.74	28.82	11.35	3.88	11.63	12.83	4	8.93	6.29	-0.885718	4.16773e-165	0.572743	2.71674e-114	-0.318806	2.4523e-27	-1.45846	0	-0.891549	8.47183e-245	-0.566912	1.81557e-61
Unigene24114_All	1.42	1.48	2.28	0.54	0.57	0.35	1.34	0.78	0.8	1.1	1.44	3.28	0.177378	0.0131158	-1.82676	1.69918e-47	-0.827782	4.70179e-15	2.00414	5.58621e-61	0.998975	4.89732e-12	1.00516	1.02848e-22
Unigene63942_All	2.56	1.39	1.92	2.33	2.72	2.41	0.87	1.55	0.99	0.78	1.45	0.42	-1.14074	8.24286e-25	0.348657	2.33577e-05	-0.772162	1.22285e-13	-1.4894	3.3601e-46	-1.12082	7.73592e-30	-0.368578	0.00132711
Unigene1758_All	6.18	5.55	3.81	7.17	11.15	8.82	1.85	7.44	5.47	1.73	3.94	2	-1.00563	2.73118e-18	0.810806	1.08703e-21	-0.0484987	0.172848	-1.81643	7.37346e-73	-0.859305	1.22778e-23	-0.957127	2.09049e-16
CL17236.Contig12_All	2.58	1.42	2.1	1.82	2.29	2.68	0.95	2.41	1.52	0.7	1.15	0.8	-1.20074	4.79523e-44	0.154896	0.00802326	-0.310926	1.36524e-05	-1.35564	7.66304e-59	-0.465822	7.66964e-11	-0.889817	1.40998e-22
CL437.Contig11_All	1.47	2.22	2.09	4.5	1.81	2.22	2.76	2.6	2.9	1.34	0.62	1.5	-0.737242	4.70455e-12	0.563354	4.45131e-11	0.520223	1.48905e-09	-1.3006	1.58071e-40	-0.0431307	0.153058	-1.25747	4.9425e-37
CL6956.Contig4_All	38.63	46.9	35.71	82.09	60.15	59.38	53.13	62.85	53.09	15.42	35.59	55.17	-0.172443	1.308e-07	0.739858	2.1107e-145	0.498962	1.11159e-61	-0.912301	5.81307e-209	-0.240896	7.783e-20	-0.671405	1.82475e-104
Unigene36775_All	29.23	22.88	48.14	20.79	12.54	17.37	22.57	19.81	29.7	23.69	31.84	45.9	0.0257772	0.0759462	-0.979835	2.84287e-240	-0.468069	1.55243e-66	1.00561	6.72192e-257	0.511766	8.86244e-57	0.493846	6.68791e-75
CL13013.Contig3_All	30.45	31.59	16.65	39.84	25.69	30.41	25.51	31.38	35.52	16.8	31.46	29.86	-0.000845687	0.219837	0.290276	1.18256e-21	0.243766	1.54404e-15	-0.291122	3.19386e-22	-0.0465104	0.0342119	-0.244612	9.41071e-16
CL4690.Contig3_All	1.89	3.56	3.18	3.94	3.23	2.67	1.84	3.38	3.81	1.69	5.11	3.58	0.275627	0.00096221	0.192208	0.013458	0.0784587	0.120745	0.0834189	0.058125	-0.113749	0.064249	0.197168	0.00958801
CL15386.Contig10_All	2.1	1.2	1.92	1.37	2.14	1.22	0.74	1.43	1.21	0.4	0.89	0.7	-1.38101	4.78136e-29	-0.138833	0.0490786	-0.614319	9.39613e-09	-1.24217	4.21426e-23	-0.475486	9.49059e-06	-0.766687	1.33173e-08
Unigene37150_All	1.64	1.56	0.96	1.34	1.54	1.28	0.4	1.46	1.7	0.35	0.73	0.81	-1.12035	1.25875e-14	0.00256123	0.239272	-0.209685	0.0314259	-1.12291	6.07139e-15	-0.212246	0.0284563	-0.910661	1.1914e-09
Unigene25076_All	7.86	4.49	5.18	8.03	5.93	7.39	4.78	5.19	7.14	1.42	4.46	3.88	-0.841623	7.47095e-82	0.287151	1.55056e-15	-0.0304359	0.123916	-1.12877	4.85456e-161	-0.317587	2.56279e-18	-0.811187	4.70586e-75
CL9115.Contig1_All	2.74	6.82	4.99	8.59	8.55	3.43	15.14	8.17	8.85	4.6	11.08	13.85	1.03304	2.69935e-61	0.504476	1.41947e-13	1.15367	2.31565e-78	0.528561	1.04195e-20	0.649191	1.22681e-30	-0.120631	0.00597141
CL2053.Contig3_All	1.9	2.44	1.52	1.6	2.53	4.11	1.49	2.33	1.18	1.66	1.05	1.61	-0.427977	0.000742374	0.494958	1.55246e-05	-0.211084	0.0385049	-0.922935	1.98976e-13	-0.706042	7.46785e-09	-0.216893	0.0382354
CL992.Contig5_All	2.17	2.19	1.76	3.22	3.38	2.36	1.81	2.46	2.24	0.64	1.42	1.56	-0.75087	3.6231e-14	0.550035	4.24723e-12	0.0992459	0.0773381	-1.3009	1.20206e-46	-0.450789	6.46122e-09	-0.850116	4.57414e-18
Unigene57936_All	15.43	11.11	13.26	20.12	19.36	16.35	25.91	25.1	24.15	6.57	4.45	7.57	-1.08874	1.38299e-108	0.491899	2.82414e-39	0.927064	4.86774e-156	-1.58064	7.08825e-269	0.435165	5.13705e-42	-2.01581	0
Unigene57868_All	7.73	13.34	3.98	9.14	9.93	12.29	3.7	6.25	5.73	2.65	3.08	3.65	-1.40717	2.12381e-84	0.327599	5.95219e-10	-0.661698	3.01558e-25	-1.73477	1.25803e-142	-0.989298	2.65901e-60	-0.745474	3.16451e-20
CL10666.Contig6_All	2.33	1.81	1.98	3.18	2.49	2.64	3.7	2.63	2.63	1.33	3.13	2.74	0.24506	0.00922721	0.446157	2.35091e-05	0.561757	1.16521e-07	-0.201096	0.0102396	0.1156	0.071521	-0.316697	0.000792338
CL9601.Contig1_All	0.54	0.81	0.38	0.63	0.45	0.81	0.63	0.88	0.91	0.37	0.64	0.51	-0.164772	0.116843	0.140296	0.139815	0.506587	0.00561647	-0.305067	0.0309925	0.366291	0.0228644	-0.671358	0.000616537
CL4892.Contig5_All	1.77	2	1.91	6.17	3.36	3.17	5.46	6.59	5.63	0.57	1.25	0.64	-1.2067	1.7409e-34	1.16479	1.98916e-70	1.64508	5.0506e-163	-2.37149	1.77041e-190	0.480285	2.31495e-22	-2.85178	0
Unigene1602_All	4.07	3.13	1.17	6.52	6.24	5.02	3.26	4.45	6.46	1.61	3.56	2.92	-0.0361665	0.174597	1.09086	6.11234e-30	0.774033	1.79279e-14	-1.12702	5.45833e-32	-0.316824	7.27994e-05	-0.8102	1.23729e-15
CL3562.Contig5_All	4.84	3.09	2.9	3.19	2.47	4.3	0.72	1.93	2.49	0.8	1.72	1.12	-1.57101	1.8443e-284	-0.118602	0.000200973	-1.06875	5.08196e-156	-1.45241	7.81267e-234	-0.950149	1.60685e-118	-0.502264	9.74877e-22
Unigene16106_All	1.32	0.99	0.94	1.68	1.34	3.07	0.47	0.97	1.08	0.72	0.21	0.44	-1.23826	3.48668e-29	0.90483	3.02239e-32	-0.366797	5.66026e-05	-2.14309	7.17647e-114	-1.27163	2.03005e-54	-0.87146	9.86649e-14
CL7447.Contig1_All	14.52	12.22	15.87	14.45	16.27	14.07	8.77	14.19	18.7	11.89	9.67	19.65	-0.0326071	0.127713	0.0773515	0.0391199	-0.015809	0.205044	-0.109959	0.00589243	-0.0931605	0.0219364	-0.0167981	0.179713
Unigene46551_All	0.38	0.46	0.51	0.71	0.48	0.61	0.43	0.83	0.72	0.16	0.47	0.32	-0.495232	0.0156237	0.407514	0.0209159	0.557561	0.00377203	-0.902746	4.0374e-05	0.150046	0.123237	-1.05279	3.25077e-06
CL105.Contig22_All	0.75	0.85	0.29	0.73	0.78	1.06	0.68	0.96	1.17	0.29	0.7	0.43	-0.400952	0.00222288	0.446673	0.000212615	0.57819	2.22481e-06	-0.847625	2.04002e-10	0.131517	0.0740957	-0.979142	2.14769e-13
CL9090.Contig11_All	6.9	6.66	3.27	13.84	10.08	8.36	12.16	8.97	12.55	6.25	13.32	12.7	0.947198	6.51373e-75	0.943416	9.8402e-74	1.00778	1.80021e-85	0.00378193	0.143065	0.0643601	0.0424433	-0.0605782	0.0455134
CL751.Contig7_All	22.29	28.15	23.07	13.21	20.69	25.06	8.02	15.32	6.61	2.43	7.96	6.44	-2.12158	0	-0.317442	1.33713e-38	-1.28335	0	-1.80414	0	-0.965907	4.35348e-219	-0.838236	6.05815e-90
Unigene41810_All	0.82	0.84	0.6	0.59	0.97	0.75	0.35	0.72	0.84	0.32	0.93	0.56	-0.316937	0.00910341	0.0309427	0.204849	-0.231536	0.0362817	-0.347879	0.00333843	-0.262479	0.0221536	-0.0854006	0.143224
CL1050.Contig1_All	0.34	0.25	0.13	0.33	0.42	0.55	0.17	0.49	0.42	0.21	0.33	0.24	0.146766	0.175628	0.868991	0.0136347	0.625103	0.0511597	-0.722225	0.0146121	-0.243888	0.13951	-0.478337	0.0723346
Unigene17466_All	0.54	0.47	0.57	3.33	2.12	4.99	1.8	2.28	2.19	0.37	0.61	0.9	0.24962	0.0208816	2.72455	1.32079e-194	1.99376	1.18218e-81	-2.47493	1.57273e-176	-0.730797	2.38329e-29	-1.74413	8.46445e-69
CL13126.Contig3_All	6.51	3.16	7.33	1.88	3.7	3.31	0.5	1.45	1.83	1.38	3.6	2.54	-1.16994	2.33203e-70	-0.933789	7.0353e-49	-2.15773	9.10557e-166	-0.236148	0.000487627	-1.22394	6.85666e-40	0.987796	6.74895e-25
Unigene61683_All	0.45	0.6	0.25	0.78	0.87	0.76	0.56	0.84	0.65	0.2	0.11	0.33	-1.0137	0.000515074	0.899164	4.02229e-05	0.677707	0.00182352	-1.91286	7.91068e-13	-0.221457	0.0794151	-1.69141	1.43302e-09
CL6662.Contig8_All	3.67	2.61	2.65	3.74	3.87	4.25	1.78	3.76	3.35	0.77	2.52	2.08	-0.728802	2.46758e-18	0.413581	1.2141e-09	0.0067658	0.243875	-1.14238	1.06715e-48	-0.406815	2.34298e-09	-0.735567	1.42644e-18
CL12202.Contig4_All	8.48	8.49	7.27	11.23	10.53	8.72	10.94	10.98	10.53	2.86	5.13	7.13	-0.673943	6.40821e-47	0.332884	2.51176e-17	0.42763	3.83473e-28	-1.00683	6.85162e-115	0.0947455	0.00358939	-1.10157	9.14101e-141
CL2383.Contig4_All	2.9	3.32	2.61	3.49	2.42	2.57	1.68	3.2	3.03	1.46	2.99	2.1	-0.426474	2.66022e-13	-0.0562146	0.0871132	-0.150017	0.00303176	-0.370259	1.47177e-10	-0.0938023	0.0309523	-0.276457	2.25856e-06
CL15766.Contig5_All	0.67	0.85	0.21	0.76	2.63	1.87	1.08	0.74	0.85	0.31	0.77	1.18	0.381256	0.00201525	1.59816	4.15617e-45	0.621824	1.88694e-06	-1.21691	5.29704e-31	-0.97634	8.98607e-22	-0.240568	0.0164432
CL10250.Contig4_All	6.41	8.26	5.47	8.3	7.08	3.03	12.64	10.48	11.15	3.68	6.93	6.7	-0.21087	9.50716e-05	-0.125976	0.00916321	0.77523	1.48445e-56	-0.0848943	0.0261021	0.901206	1.81438e-72	-0.9861	1.39651e-84
Unigene42488_All	2.21	3.25	1.39	4.16	5.84	4.43	2.8	2.19	4.07	0.71	1.88	1.49	-0.735634	2.31201e-08	1.07762	1.09022e-27	0.413726	8.82943e-05	-1.81325	3.20005e-59	-0.663894	4.20601e-13	-1.14936	5.02566e-20
CL15349.Contig1_All	8.63	12.09	4.85	6.11	24.4	16.55	2.92	5	7.98	1.42	3.51	3.48	-1.59455	1.02661e-108	0.880881	3.04354e-78	-0.67496	6.35688e-28	-2.47544	0	-1.55584	1.14918e-189	-0.919595	6.96319e-30
Unigene6250_All	0.92	0.59	0.74	1.92	0.77	1.46	0.41	0.72	0.52	0.48	1.08	0.94	0.155689	0.0467801	0.887175	2.6935e-18	-0.438642	0.000278999	-0.731486	4.87148e-14	-1.32582	3.30441e-33	0.594332	8.71508e-07
CL9273.Contig6_All	27.92	23.02	21.32	30.66	21.38	36.98	12.33	20.49	19.09	6.31	9.89	9.58	-1.4793	0	0.303825	1.38355e-28	-0.465685	8.66165e-50	-1.78312	0	-0.76951	4.23167e-147	-1.01361	1.19926e-138
CL3708.Contig10_All	1.79	1.38	1.37	1.65	0.89	1.04	0.39	1.14	1.52	1.12	1.48	1.55	-0.123369	0.0423814	-0.337969	9.03483e-05	-0.563171	1.82873e-09	0.214601	0.00399865	-0.225201	0.00868859	0.439802	2.43488e-06
CL11520.Contig1_All	5.5	2.12	4.63	0.85	2	2.83	0.52	1.57	1	1.26	1.18	1.12	-1.7794	1.49171e-102	-1.11016	6.09448e-51	-1.97745	7.35135e-117	-0.66924	7.53779e-12	-0.867289	7.18847e-17	0.198049	0.0260149
CL14141.Contig1_All	1.59	0.5	0.76	2.33	1.91	2.41	4.17	5.5	4.82	0.96	2.49	3.3	1.26082	1.84135e-15	1.22894	1.71193e-14	2.36443	5.8606e-71	0.0318879	0.125118	1.13549	3.38745e-26	-1.10361	2.54971e-25
CL7661.Contig11_All	1.97	2.19	4.28	1.58	3.23	2.56	0.93	2.13	1.33	0.58	1.04	1.6	-1.38367	4.37531e-53	-0.195785	0.00285545	-0.932776	8.76718e-29	-1.18789	1.94313e-37	-0.73699	1.58048e-17	-0.450897	9.24977e-06
Unigene27459_All	1.62	1.82	1.41	1.89	2.77	2.11	1.72	2.41	1.16	0.86	1.53	1.05	-0.490383	4.24787e-07	0.483046	7.01662e-09	0.137493	0.0412825	-0.973429	1.79364e-26	-0.345552	1.48299e-05	-0.627877	8.26577e-11
CL11051.Contig1_All	1.47	5.19	3.01	1.94	4.7	4.19	3.94	5.29	3.9	2.7	5.69	7.93	0.75996	3.33012e-43	0.162673	0.0029149	0.448163	1.31068e-14	0.597288	3.53207e-29	0.28549	2.7427e-07	0.311797	5.75506e-10
CL8977.Contig5_All	0.39	0.78	0.75	0.85	0.71	0.92	1.09	0.87	0.62	0.62	1.05	1.15	0.579145	0.012474	0.370434	0.0622259	0.450936	0.040707	0.208711	0.0714662	0.0805023	0.193821	0.128208	0.154857
Unigene46586_All	0.66	0.17	0.46	1.18	0.9	0.49	0.73	1.16	0.6	0.37	0.7	0.53	0.336521	0.0722567	1.00589	0.000137509	0.971736	0.000247732	-0.669371	0.00217426	-0.0341554	0.218344	-0.635216	0.00537481
CL10682.Contig7_All	8.39	7.06	7.47	7.7	9.6	7.07	5.43	7.55	7.06	4.33	8.17	6.52	-0.262349	4.7908e-07	0.0919311	0.0222503	-0.182248	0.000275035	-0.35428	7.14735e-12	-0.274179	9.78394e-08	-0.0801012	0.0421646
Unigene16220_All	1.05	1.72	1.02	2.59	2.54	2.44	1.25	2.44	1.88	0.35	0.84	0.87	-0.876245	2.74598e-14	0.99621	3.12356e-32	0.563052	3.73375e-10	-1.87246	6.93583e-82	-0.433158	8.94164e-09	-1.4393	3.08718e-42
Unigene35295_All	0.35	1.32	1.03	2.05	1.15	0.83	0.52	1.38	0.87	1.6	3.52	2.82	1.55887	8.20904e-40	0.576246	1.841e-05	0.049663	0.202054	0.98262	1.42402e-20	-0.526583	7.08878e-05	1.5092	7.40408e-38
CL7605.Contig5_All	3.02	2.27	1.99	0.77	2.58	2.3	1.04	1.7	1.22	0.66	1.43	1.33	-1.08563	4.43275e-41	-0.365439	1.73368e-07	-0.871075	9.46281e-29	-0.720194	2.28692e-17	-0.505635	8.345e-10	-0.214558	0.00720546
CL15504.Contig4_All	12.28	9.78	10.53	13.07	11.12	10.47	6.66	10.92	8.34	5.12	7.33	6.95	-0.744035	2.23643e-98	0.0911514	0.00112906	-0.321896	1.48308e-22	-0.835187	1.25013e-127	-0.413047	5.92533e-37	-0.422139	1.50664e-29
CL3917.Contig4_All	1.73	3.27	4.04	3.34	4.49	5.1	2.5	5.37	4.9	1.25	1.28	1.48	-1.15728	4.53437e-16	0.522436	5.9922e-07	0.518698	7.85205e-07	-1.67972	6.75836e-38	-0.00373767	0.236526	-1.67598	3.16205e-37
CL4110.Contig20_All	0.12	0.16	0.09	0.03	0.08	0.09	0.2	0.12	0.08	0.12	0.15	0.12	0.105476	0.184393	-0.832015	0.0300183	0.148565	0.19707	0.937491	0.0102157	0.98058	0.0148542	-0.0430889	0.215743
Unigene44836_All	65.85	48.1	41.73	24.91	57.32	32.46	20.01	29.37	23.07	42.44	107.56	89.42	0.64053	1.26954e-106	-0.433887	9.35467e-35	-1.07886	3.87795e-164	1.07442	1.01729e-255	-0.64497	1.34514e-51	1.71939	0
CL6509.Contig8_All	4.53	2.93	4.37	3.27	3.35	1.98	1.87	3.48	3.41	2.24	4.65	4.21	-0.0898678	0.022527	-0.457658	7.18705e-17	-0.424289	7.45814e-15	0.36779	1.2977e-11	0.0333688	0.150353	0.334421	9.30449e-10
Unigene65503_All	0.92	0.74	0.65	1.55	2.03	1.62	1.31	1.22	1.14	0.08	0.32	0.32	-1.68172	9.89052e-14	1.16882	4.44998e-17	0.672434	5.12045e-06	-2.85053	4.82159e-53	-0.496382	3.08445e-05	-2.35415	5.74856e-31
Unigene50420_All	1.49	0.9	0.92	2.7	2.74	2.5	1.31	1.68	2.1	0.32	0.59	1.06	-0.734983	0.000164916	1.26628	1.27121e-17	0.635978	5.90894e-05	-2.00126	6.59051e-33	-0.630299	1.17853e-06	-1.37096	1.98095e-13
CL16829.Contig2_All	2.37	2.86	1.3	3.83	5.76	4.66	1.4	3.9	2.6	0.72	1.38	1.68	-0.782295	2.33623e-15	1.12899	9.45494e-56	0.289259	0.000216452	-1.91129	1.03856e-120	-0.839735	1.23627e-34	-1.07155	1.26921e-29
CL5175.Contig5_All	0.93	0.51	0.25	1.01	0.61	0.4	0.47	1.83	1.27	0.34	0.56	0.27	-0.533333	0.000413328	0.253022	0.0247885	1.09345	1.45705e-18	-0.786355	1.55415e-07	0.840423	1.33478e-12	-1.62678	8.49025e-33
CL3120.Contig5_All	1.26	1.14	2.65	0.54	0.49	0.69	0.82	1.08	0.5	1.06	0.5	1.04	-0.948286	1.67989e-15	-1.55054	4.05241e-31	-1.06214	4.6208e-18	0.602256	2.89473e-05	0.488403	0.000946999	0.113853	0.110562
Unigene1707_All	1.36	1.25	0.46	2.95	3.34	2.81	0.74	1.71	2.73	0.64	0.64	0.58	-0.704595	0.000400455	1.5701	8.53707e-27	0.769376	2.56527e-06	-2.27469	1.87499e-43	-0.80072	2.91873e-10	-1.47397	5.74525e-15
CL4467.Contig8_All	6.36	6.41	9.3	8.72	4.89	5.53	10.7	9.03	10.06	6.46	9.64	11.12	0.311416	1.16631e-09	-0.200603	0.000187136	0.441901	5.0773e-18	0.512019	9.82e-22	0.642504	1.1432e-33	-0.130485	0.00237452
Unigene7693_All	7.1	6.16	5.95	8.09	9.27	8.45	8.29	7.88	6.79	3.43	7.34	6.83	-0.118982	0.0129502	0.428458	1.89608e-15	0.267362	8.64701e-07	-0.54744	1.2843e-23	-0.161096	0.000749595	-0.386344	6.13027e-12
CL3474.Contig14_All	0.81	0.52	0.79	0.44	0.35	0.66	0.42	0.47	0.56	0.22	0.53	0.21	-1.15537	5.69443e-23	-0.538666	1.86804e-07	-0.543899	1.61599e-07	-0.616704	4.43087e-07	-0.00523284	0.235354	-0.611471	1.02021e-06
Unigene39370_All	1.36	0.69	0.54	0.57	0.56	1.09	0.09	0.34	0.41	0.1	0.17	0.09	-2.84972	3.81596e-14	-0.214978	0.102787	-1.60245	1.04477e-07	-2.63474	7.47779e-12	-1.38748	6.7662e-06	-1.24726	0.00427971
CL6818.Contig1_All	23.13	13.82	32.76	4.96	2.36	2.82	5.87	5.5	4.86	16.01	26.56	19.37	-0.166444	5.37605e-12	-2.77766	0	-2.09613	0	2.61121	0	0.681529	1.6511e-34	1.92968	0
Unigene45736_All	1.75	1.86	1.27	2.45	2.67	2.84	1.56	1.71	2.15	0.57	0.85	0.9	-1.05781	7.03275e-09	0.712304	1.23775e-07	0.170657	0.0794631	-1.77011	3.39134e-27	-0.541647	2.46838e-05	-1.22847	7.90756e-12
Unigene50319_All	3.97	1.93	4.07	1.51	0.51	0.88	0.91	0.84	1.04	2.57	3.69	2.58	-0.167204	0.00418106	-1.77171	1.12568e-86	-1.8248	6.44431e-90	1.6045	3.10294e-68	-0.0530953	0.171121	1.6576	8.61104e-71
Unigene54442_All	20.37	29.57	17.97	38.94	35.02	25.97	14.34	16.56	14.96	8.12	13.42	19.83	-0.700443	2.21513e-57	0.562396	6.75049e-57	-0.551164	1.1141e-37	-1.26284	2.56913e-221	-1.11356	2.14269e-179	-0.149279	0.000722711
Unigene17949_All	5.98	4.2	3.47	11.96	8.85	8.15	2.74	5.36	8.19	1.43	0.84	0.47	-2.31215	2.15112e-161	1.08815	6.16826e-116	0.263408	8.3146e-07	-3.4003	0	-0.82474	3.08029e-73	-2.57556	7.1473e-218
Unigene989_All	3.36	3.01	3.16	3.44	4.29	2.66	2.01	2.38	3.16	1.39	2.9	2.03	-0.587184	1.67025e-11	0.129402	0.0304238	-0.325024	5.91063e-05	-0.716586	4.11529e-17	-0.454426	2.50993e-08	-0.26216	0.00177542
CL8804.Contig1_All	2.52	3.12	1.86	6.93	5.17	3.67	5.14	4.47	3.45	0.96	2.67	3.21	-0.122635	0.0524555	1.07651	3.61323e-43	0.810531	3.83342e-23	-1.19915	1.23129e-51	-0.265981	4.12535e-05	-0.933166	4.42214e-29
CL1587.Contig10_All	2.33	1.7	1.22	1.44	0.75	0.51	1.16	2.36	2.31	1.37	3.97	1.8	0.446401	9.15778e-10	-0.952897	9.35056e-24	0.160775	0.0140501	1.3993	1.188e-57	1.11367	2.66839e-33	0.285626	3.22109e-05
CL7261.Contig2_All	0.52	0.47	0.34	0.33	0.77	0.28	0.14	0.51	0.5	0.19	0.35	0.48	-0.361157	0.0643118	0.0531644	0.211911	-0.189628	0.151855	-0.414321	0.0313954	-0.242792	0.115058	-0.171529	0.147734
CL7138.Contig5_All	1.46	1.46	1.84	3.38	1.38	1.53	3.19	2.46	3.83	2.32	2.49	2.6	0.644739	8.70314e-13	0.404836	1.00831e-05	0.99944	4.32993e-31	0.239902	0.000981235	0.594604	9.91183e-14	-0.354701	1.74652e-06
CL1498.Contig8_All	8.53	4.05	5.74	5.76	7.55	8.21	1.24	4.83	5.59	1.48	3.99	2.62	-1.17498	1.3596e-107	0.233965	1.26643e-08	-0.641146	2.34725e-39	-1.40895	5.58133e-167	-0.875111	1.82138e-77	-0.533837	2.72099e-19
CL16739.Contig3_All	1.01	1.08	1.48	1.55	2.05	1.62	0.6	1.21	1.44	0.92	2.51	1.97	0.605763	4.78433e-07	0.549975	5.89886e-06	-0.118617	0.117727	0.055788	0.0988419	-0.668593	1.13432e-07	0.724381	6.26673e-09
CL5571.Contig18_All	1.02	0.66	0.71	1.19	1.18	1.14	0.29	0.57	0.99	0.55	0.55	0.34	-0.730366	2.14409e-08	0.558511	9.92287e-08	-0.358906	0.0017279	-1.28888	9.66282e-27	-0.917417	7.87577e-16	-0.37146	0.00304473
Unigene27313_All	1.35	0.42	1.34	0.39	0.33	0.66	0.29	0.31	0.32	0.32	0.75	0.81	-0.722168	1.62888e-22	-1.17016	8.00942e-48	-1.75346	6.16481e-86	0.44799	2.16137e-07	-0.583301	5.15018e-08	1.03129	1.1805e-24
CL6435.Contig2_All	3.2	3.06	3.51	4.54	4.76	4.95	1.57	2.81	3.76	1.35	1.85	2.66	-0.735352	1.24385e-29	0.543866	2.57225e-25	-0.257124	9.58492e-06	-1.27922	2.19342e-103	-0.800991	3.88811e-48	-0.478227	1.45247e-12
Unigene46729_All	0.78	0.74	0.82	0.48	0.3	0.56	0.19	0.33	0.3	0.44	1.21	0.68	0.00902137	0.218515	-0.805097	0.00241964	-1.50572	3.50169e-06	0.814118	0.00117269	-0.700625	0.0219773	1.51474	2.47779e-06
CL16029.Contig3_All	9.1	5.98	8.9	12.45	16.54	16.92	5.05	15.07	14.02	2.12	2.94	2.04	-1.75096	3.27264e-195	0.938438	4.93877e-142	0.521636	3.40938e-39	-2.6894	0	-0.416801	8.83839e-35	-2.2726	0
Unigene62901_All	0.86	1.01	0.54	1.37	0.88	1.08	1.46	1.61	1.72	1.62	1.81	2.05	1.19491	7.11812e-19	0.477301	0.000746355	1.00306	6.65416e-13	0.717614	2.39734e-09	0.525756	2.26249e-05	0.191858	0.0267085
CL1980.Contig3_All	24.41	31.85	19.8	35.27	33.68	23.38	32.02	25.65	37.58	16.46	33.78	30.14	0.0924411	0.0039361	0.28511	1.66505e-15	0.338141	2.44777e-21	-0.192669	1.32675e-08	0.0530304	0.0363554	-0.2457	1.42418e-12
CL6918.Contig11_All	5.83	3.88	6.2	1.83	8.65	6.96	3.48	4.84	5.18	1.87	3.05	2.8	-1.03852	2.91303e-54	0.131859	0.00563602	-0.228463	4.27339e-05	-1.17038	8.92503e-72	-0.360321	1.79198e-10	-0.81006	3.44743e-31
CL4789.Contig5_All	2.01	2.83	3.18	6.91	5.21	5.59	6.03	6.04	5.7	2.01	4.62	3.65	0.367761	2.05752e-05	1.14731	7.315e-47	1.15831	9.26365e-48	-0.779549	5.94e-26	0.0110039	0.21421	-0.790553	2.58914e-26
Unigene12814_All	1.07	1.46	1.93	4.33	2.28	2.03	3.15	2.31	3.54	1.32	2.27	2.73	0.514596	5.62e-06	0.962375	1.59044e-18	1.02463	4.32521e-21	-0.447779	1.95845e-06	0.0622571	0.133479	-0.510036	1.35093e-07
Unigene34236_All	5.33	8.07	3.62	2.94	3.13	4.03	1.26	4.3	2.17	1.76	2.2	2.42	-1.41223	4.89779e-144	-0.750997	4.55729e-52	-1.12607	1.03235e-100	-0.661233	3.26527e-26	-0.37507	2.84519e-10	-0.286163	8.89921e-06
CL5170.Contig2_All	1.12	2.72	1.78	0.91	0.79	1.44	0.27	1.04	0.77	2.01	0.74	1.51	-0.392886	9.19443e-05	-0.839359	3.42764e-13	-1.42482	1.97107e-28	0.446473	7.17397e-05	-0.58546	3.8881e-05	1.03193	3.96984e-14
Unigene48052_All	13.8	15.91	17.01	25.12	12.93	10.24	31.71	23.94	23.12	13.77	27.27	28.15	0.579332	1.13703e-43	0.0541998	0.0686134	0.767187	2.88007e-79	0.525132	3.75949e-37	0.712987	8.01022e-70	-0.187855	1.4329e-07
Unigene57732_All	1.02	0.46	1.09	0.42	0.48	0.99	0.2	0.59	0.54	0.24	0.5	0.17	-1.49175	7.12962e-21	-0.439448	0.000403652	-0.941079	7.19958e-11	-1.0523	3.07092e-10	-0.501632	0.000585842	-0.550667	0.00122023
CL4404.Contig5_All	0.56	1.52	0.63	3.22	1.19	1.81	1.98	1.79	4.6	0.93	3.47	1.97	1.24088	5.70296e-22	1.20242	2.621e-20	1.63462	2.51677e-41	0.0384639	0.112161	0.432198	5.56541e-06	-0.393734	2.2397e-05
CL8859.Contig3_All	19.81	13.81	21.97	21.77	14.93	18.99	14.64	22.07	22.62	8.91	14.44	13.19	-0.596341	6.50223e-50	0.00689529	0.210451	0.106636	0.00114183	-0.603236	2.01455e-51	0.0997412	0.00195354	-0.702977	8.68611e-71
Unigene13771_All	0.39	0.82	0.47	0.29	0.73	0.61	0.53	0.57	0.31	0.19	0.42	0.38	-0.766266	9.84627e-05	-0.0411814	0.205111	-0.246494	0.0628387	-0.725085	0.000135739	-0.205313	0.0823986	-0.519772	0.00579033
Unigene608_All	1.56	1.31	0.87	1.89	2.29	1.53	2.13	2.16	2.07	1.16	1.39	0.55	-0.268584	0.0013791	0.610206	2.96368e-14	0.770719	1.08339e-22	-0.87879	9.01843e-26	0.160513	0.00805601	-1.0393	1.36001e-36
CL2600.Contig19_All	8.53	3.51	6.27	2.53	4.72	6.36	1.18	2.61	1.63	1.62	4.59	2.14	-1.12651	2.28469e-46	-0.425867	6.80858e-10	-1.74014	8.343e-87	-0.70064	5.10267e-17	-1.31428	1.48648e-43	0.613637	4.59038e-09
CL4456.Contig7_All	3.52	2.04	2.2	1.48	2.67	3.54	0.98	1.23	1.11	0.54	1.13	0.69	-1.70829	1.16749e-80	-0.0133017	0.209103	-1.21906	6.43713e-49	-1.69499	2.36003e-79	-1.20576	1.40571e-47	-0.489223	4.59131e-06
CL2891.Contig1_All	3.76	7.69	6.95	9.59	8.48	4.28	19.38	8.47	11.61	10.89	26.04	23.81	1.74009	4.89903e-166	0.288507	0.000172552	1.11687	8.35997e-56	1.45158	2.28306e-128	0.828367	1.41343e-34	0.623213	9.44226e-33
CL9825.Contig37_All	1.54	2.04	2.28	2.25	1.56	1.57	3.19	3.55	3.03	4.41	13.19	12.35	2.35924	0	-0.120284	0.0584855	0.744587	3.1508e-20	2.47952	0	0.864871	1.3941e-25	1.61465	8.67609e-199
CL10929.Contig2_All	0.58	0.75	0.18	0.28	1.1	0.92	0.54	0.73	0.27	0.24	0.12	0.12	-1.63806	1.87199e-08	0.616735	0.000899282	0.0540517	0.216354	-2.25479	1.46855e-17	-0.562684	0.00193549	-1.69211	5.67249e-09
CL16311.Contig15_All	0.94	1.03	0.87	0.93	0.75	1.34	0.97	1.11	0.87	0.28	0.58	0.33	-1.24792	3.7347e-46	0.0907521	0.056355	0.0599968	0.114949	-1.33867	1.01715e-54	-0.0307553	0.168882	-1.30792	2.82596e-51
CL14837.Contig3_All	0.32	0.54	0.49	1.44	1.14	0.43	1.31	0.96	1.95	0.5	1.09	0.56	0.669823	5.01312e-07	1.16488	3.36718e-20	1.64655	5.21938e-45	-0.495061	2.69266e-06	0.481671	2.44263e-07	-0.976732	3.75935e-21
CL936.Contig50_All	0.78	0.86	0.84	2.11	2.39	1.19	1.04	1.88	0.95	0.58	0.75	1.08	-0.0375534	0.184764	1.19546	3.85546e-22	0.655158	7.75418e-07	-1.23301	1.26176e-23	-0.5403	5.48155e-07	-0.692711	1.88423e-07
Unigene53887_All	3.54	5.34	3.56	9.19	9.49	5.14	3.25	4.61	4.05	0.89	1.34	2.52	-1.37857	1.61797e-36	0.941156	1.19705e-37	-0.0484396	0.161783	-2.31973	6.87576e-138	-0.989595	1.48718e-40	-1.33013	2.03819e-33
CL4862.Contig8_All	0.13	0.41	0.31	0.21	0.15	0.3	0.16	0.39	0.4	0.07	0.09	0.09	-1.77188	2.98685e-10	-0.362092	0.0328853	0.171855	0.117761	-1.40978	9.32486e-07	0.533947	0.00518382	-1.94373	1.6969e-12
CL8437.Contig4_All	0.8	0.7	0.54	1.11	1.15	1.33	0.71	1.31	1.19	0.19	0.44	0.55	-0.780666	6.00253e-08	0.821633	1.83306e-13	0.666667	4.83827e-09	-1.6023	4.3515e-36	-0.154967	0.0374262	-1.44733	5.49208e-28
CL12629.Contig2_All	0.28	0.27	0.52	0.31	0.84	0.8	0.41	0.29	0.59	0.1	0.36	0.38	-0.339383	0.0433799	0.862062	6.51389e-06	0.28222	0.062105	-1.20144	2.87921e-09	-0.579841	0.000864875	-0.621604	0.00252153
CL3962.Contig2_All	2.71	1.37	3.12	2.22	1.93	1.28	1.08	1.7	2.32	1.02	2.06	1.96	-0.511876	1.13298e-08	-0.408946	2.90095e-06	-0.493981	4.24486e-08	-0.10293	0.0496423	-0.0850344	0.106785	-0.0178954	0.203239
CL8787.Contig4_All	1.19	0.42	1.5	0.74	0.95	0.55	1.27	0.55	0.78	0.68	1.94	1.84	0.532934	0.000920504	-0.470962	0.00897001	-0.249139	0.0691621	1.0039	5.32671e-08	0.221823	0.0890076	0.782072	1.11488e-05
CL15022.Contig2_All	2.88	2.38	5.33	4.43	4.86	3	6.04	8.07	10.74	5.8	16.98	15.5	1.86263	2.62015e-243	0.218298	0.00129996	1.24095	2.17355e-87	1.64433	5.27091e-205	1.02265	2.36184e-64	0.621676	5.06456e-43
Unigene23881_All	2.7	1.32	1.83	1.27	1.31	2.63	0.34	0.94	1.05	0.28	1	0.55	-1.67463	1.07366e-95	-0.164758	0.00295669	-1.32389	2.0019e-67	-1.50987	3.43359e-74	-1.15914	3.24647e-49	-0.350736	0.000211072
CL2860.Contig7_All	9.05	10.28	8.99	3.71	12.3	10.12	1.99	3.17	4.8	2.73	5.33	2.57	-1.41086	3.67457e-231	-0.116353	0.000338884	-1.49923	1.0008e-250	-1.29451	1.80938e-187	-1.38287	8.18497e-205	0.0883658	0.033525
Unigene1425_All	11.02	8.93	17.18	13.68	14.52	10.33	8.49	8.21	9.6	13.35	24.09	15.24	0.518735	5.81759e-22	0.0605022	0.0853792	-0.479371	7.88771e-14	0.458233	3.80906e-18	-0.539873	2.40909e-17	0.998106	2.11769e-64
Unigene41226_All	1.9	1.54	2.87	0.7	0.23	0.45	0.38	0.56	0.43	0.68	2.64	1.52	-0.379579	2.27768e-07	-2.19302	8.26302e-99	-2.19643	1.09208e-98	1.81344	1.16265e-60	-0.00341343	0.23908	1.81685	3.00262e-60
CL15468.Contig11_All	0.76	0.64	0.37	1.74	0.88	1.05	0.77	1.07	1.74	0.84	1.46	1	0.904253	6.07002e-06	1.05044	1.41897e-07	1.02563	3.21435e-07	-0.146185	0.0659689	-0.0248064	0.218232	-0.121379	0.124005
Unigene52613_All	1.21	2.73	0.9	6.18	4.46	2	4.36	2.4	3.22	2.29	3.02	3.48	0.866891	3.60529e-29	1.38907	3.79292e-85	1.04674	1.02239e-43	-0.522175	3.51673e-18	-0.342328	4.59242e-09	-0.179846	0.00186925
CL11829.Contig31_All	0.12	0.29	0.11	0.19	0.15	0.16	0.17	0.07	0.12	0.07	0.18	0.27	-0.0147632	0.21567	-0.0555499	0.209124	-0.525856	0.0281234	0.0407867	0.136395	-0.470306	0.0385411	0.511093	0.0269842
CL9383.Contig5_All	0.29	0.57	0.29	1.53	0.86	1.21	0.38	0.76	0.54	0.07	0.25	0.13	-1.33747	1.02213e-06	1.6521	1.61383e-22	0.556497	0.00259545	-2.98957	5.13497e-45	-1.0956	8.33714e-13	-1.89397	1.32959e-13
CL3740.Contig5_All	2.15	0.83	1.13	0.74	3.15	3.24	0.41	0.55	1.14	0.28	0.33	0.17	-2.39214	4.01882e-54	0.796846	3.01793e-19	-0.959719	1.6013e-15	-3.18898	1.79766e-124	-1.75656	4.23368e-62	-1.43242	2.9005e-15
CL664.Contig29_All	1.46	0.97	0.78	0.6	0.46	0.99	1.11	0.9	1.59	0.56	0.81	0.71	-0.621524	2.93972e-08	-0.639056	1.77702e-08	0.166946	0.0320144	0.0175324	0.137396	0.806002	5.60471e-13	-0.788469	1.08667e-12
CL2481.Contig1_All	0	0	0	0	0	0	0	0	0	0.05	0.04	0.09	6.20508	1.46657e-10					6.20282	8.50763e-11			6.19296	1.69734e-10
CL8083.Contig14_All	11.64	17.15	6.3	3.52	16.41	14.48	0.81	3.77	3.5	1	1.63	0.53	-3.47195	0	-0.02852	0.117855	-2.106	0	-3.44343	0	-2.07748	0	-1.36595	2.72471e-46
Unigene11711_All	9.02	5.36	8.37	7.07	7.77	10.08	7.62	8.14	6.72	3.19	7.69	7.49	-0.30288	1.77101e-11	0.132632	0.000705111	-0.0100918	0.218193	-0.435512	6.90695e-23	-0.142724	0.000338065	-0.292788	9.45842e-11
CL9270.Contig11_All	2.14	3.78	3.57	4.83	2.56	2.99	7.68	6.07	6	4.17	4.95	5.38	0.619317	2.49076e-17	0.134194	0.0292607	1.06531	1.59941e-54	0.485123	4.66221e-12	0.931116	6.61859e-44	-0.445993	2.13342e-13
CL15164.Contig1_All	1.81	3.1	1.58	6.96	5.87	4.86	2.34	4.47	5.03	0.7	1.86	1.22	-0.773367	9.93473e-12	1.44931	8.22248e-76	0.879601	3.86139e-24	-2.22267	4.66054e-136	-0.569704	2.86429e-17	-1.65297	2.15629e-62
CL1199.Contig5_All	0.32	0.14	0.19	0.08	0.11	0.13	0.04	0.06	0.11	0.08	0.11	0.07	-1.33388	2.06135e-08	-0.952003	1.44684e-05	-1.60181	2.62842e-10	-0.381872	0.0316397	-0.649809	0.0106744	0.267937	0.104758
CL10656.Contig3_All	0.53	0.56	0.21	0.93	2.49	2.01	0.32	0.79	0.74	0.12	0.2	0.4	-0.851117	2.58812e-06	2.05461	3.44854e-72	0.509619	0.000281994	-2.90573	1.41985e-107	-1.54499	4.82425e-49	-1.36074	2.26515e-15
CL12821.Contig2_All	0.52	0.89	0.83	0.68	0.74	0.44	0.26	0.46	0.26	0.19	0.15	0.34	-1.73727	1.4533e-24	-0.266617	0.0143445	-1.18186	2.02152e-14	-1.47065	5.71508e-17	-0.915248	1.08013e-08	-0.555402	0.00268287
CL4693.Contig4_All	4.98	4.81	5.83	1.58	3.27	3.64	0.82	1.28	1.93	0.91	2.2	2.36	-1.50252	1.11833e-57	-0.877952	2.36512e-25	-1.94393	3.2487e-81	-0.624566	3.03108e-09	-1.06598	2.04711e-19	0.44141	0.000298449
CL4462.Contig8_All	1.39	1.73	0.93	1.51	1.49	1.61	0.73	1.44	1.48	0.5	0.94	0.88	-0.802689	8.13607e-16	0.189959	0.00853055	-0.144226	0.0356225	-0.992648	7.06536e-25	-0.334185	5.61076e-05	-0.658463	9.73751e-11
CL7952.Contig6_All	15.71	8.05	15.01	7.69	12.23	9.09	3.71	7.25	8.56	8.6	18.15	8.74	-0.12456	2.93088e-05	-0.417352	3.84341e-36	-0.981119	2.4676e-157	0.292792	1.87878e-18	-0.563767	3.88043e-46	0.856558	6.57934e-116
Unigene38561_All	0.69	0.6	0.35	0.52	0.56	0.71	0.17	0.48	0.71	0.1	0.27	0.15	-1.64841	2.18609e-11	0.130842	0.127886	-0.255807	0.0608131	-1.77926	1.03416e-13	-0.386649	0.014727	-1.39261	4.97847e-08
Unigene57583_All	0.76	0.81	0.66	0.71	1.02	0.6	0.56	0.94	0.51	0.49	0.6	0.54	-0.435932	0.00161566	0.0654517	0.166714	-0.131131	0.110389	-0.501383	0.000233428	-0.196582	0.0527897	-0.304801	0.0164636
CL8864.Contig3_All	0.59	0.63	0.36	0.4	0.42	0.37	0.78	0.39	0.63	0.33	1.21	1.08	0.734224	0.00239234	-0.411431	0.0639636	0.201563	0.144265	1.14565	2.37717e-05	0.612993	0.0190413	0.532661	0.0135778
CL5703.Contig2_All	2.13	1.54	1.63	3.57	2.14	2.97	0.79	1.47	1.76	0.66	1.71	1.38	-0.493395	1.57482e-10	0.714702	3.71176e-29	-0.391572	2.24275e-07	-1.2081	2.43863e-68	-1.10627	1.20375e-58	-0.101824	0.0613858
CL11156.Contig9_All	14.8	41.06	21.86	83.2	44.84	24.39	126.15	74.68	82.98	39.69	52.07	80.92	1.1651	0	0.978249	2.64645e-235	1.87991	0	0.186853	5.37298e-15	0.901664	0	-0.71481	1.88838e-257
CL4452.Contig11_All	0.88	0.55	0.68	0.38	1.22	1.44	0.58	0.77	0.34	0.42	0.47	0.47	-0.627621	1.3016e-06	0.530057	7.86155e-07	-0.30632	0.00612045	-1.15768	1.55268e-21	-0.836377	5.30999e-13	-0.321301	0.00749453
Unigene14529_All	1.34	0.31	1.14	0.59	1.08	0.97	0.89	1.04	0.44	0.34	0.61	0.21	-1.25921	1.34112e-06	-0.0763546	0.184668	-0.212179	0.103385	-1.18286	3.82601e-06	-0.135824	0.146388	-1.04703	7.64952e-05
CL394.Contig22_All	0.52	0.31	0.51	1.29	1.73	1.5	1.67	2.57	0.91	0.39	0.94	0.5	0.455853	0.0114692	1.75367	4.07792e-23	1.95557	4.14364e-30	-1.29781	6.70742e-16	0.201907	0.0340302	-1.49972	1.84235e-21
CL6360.Contig9_All	4.06	3.06	3.78	6.17	4.18	3.68	3.53	4.52	5.29	1.25	2.67	2.73	-0.704824	3.7103e-19	0.368732	1.23738e-08	0.301209	3.29421e-06	-1.07356	1.34832e-47	-0.0675238	0.0799671	-1.00603	1.15623e-40
CL5096.Contig4_All	1.43	1.27	1.02	2.75	2.68	2.64	1.11	2.05	2.53	0.41	0.96	0.61	-0.904268	5.97856e-12	1.11915	1.24353e-32	0.622767	7.94123e-10	-2.02342	3.50489e-76	-0.496381	2.62514e-09	-1.52704	3.22134e-37
Unigene45313_All	0.9	0.48	0.38	0.74	1.61	0.53	0.51	0.6	0.53	0.22	0.25	0.12	-1.55534	4.84594e-07	0.709306	0.000420199	-0.0936614	0.192667	-2.26464	3.74303e-16	-0.802967	0.000116551	-1.46168	3.06545e-06
CL6123.Contig9_All	1.57	3.57	3.69	3.31	2.03	1.55	2.35	3.23	3.77	2.67	1.92	3.3	-0.157077	0.0136158	-0.352334	8.62274e-06	0.0908535	0.0721468	0.195257	0.00393887	0.443187	2.68362e-08	-0.247931	0.000555674
Unigene23491_All	1.47	1.11	0.83	1.12	1.5	0.71	0.51	1.3	1.24	0.25	0.93	0.69	-0.863535	3.97149e-13	-0.0282853	0.196875	-0.148704	0.05196	-0.83525	1.52981e-12	-0.120419	0.0748062	-0.714832	3.86356e-09
Unigene61417_All	4.99	7.18	3.46	4.51	5.98	5.32	2.79	3.9	3.99	1.67	4.24	3.32	-0.754396	4.84736e-37	0.0178999	0.185011	-0.540458	4.46802e-21	-0.772296	3.16537e-39	-0.558358	1.86262e-22	-0.213938	0.000389174
CL10334.Contig5_All	0.74	0.54	0.37	1.35	0.75	0.85	0.2	0.81	0.57	0.18	0.23	0.17	-1.49266	3.25416e-21	0.850838	6.95987e-16	-0.042787	0.197844	-2.34349	5.28816e-66	-0.893625	5.17885e-17	-1.44987	9.63088e-20
Unigene50625_All	1.43	1.33	0.9	3.74	1.77	1.18	3.08	1.95	2.62	1.11	1.96	2.29	0.56309	0.000330967	0.874502	3.49891e-08	1.07785	3.7518e-12	-0.311412	0.00623322	0.203348	0.0396711	-0.514761	0.000107376
CL16090.Contig5_All	1.57	1.55	1.01	1.05	1.65	1.67	0.63	0.78	1.17	0.41	0.66	0.69	-1.22414	9.93583e-35	0.0823661	0.085076	-0.672434	1.03424e-13	-1.30651	1.2151e-40	-0.754801	3.30268e-17	-0.551706	4.05863e-07
CL4149.Contig6_All	0.2	0.45	0.6	0.73	0.58	0.54	0.63	1.22	0.88	0.38	0.61	0.42	0.182475	0.0989998	0.563505	0.00207785	1.13631	4.44499e-10	-0.38103	0.00954066	0.572808	0.000259424	-0.953838	4.26229e-08
CL6107.Contig4_All	6.51	4.55	6.58	2.19	1.05	0.78	1.39	1.21	1.08	10.28	13.76	16.85	1.22208	7.51528e-130	-2.12671	1.56324e-122	-2.25237	4.85354e-131	3.34879	0	-0.125654	0.0963306	3.47444	0
Unigene45571_All	0.37	0.38	0.47	0.44	0.22	0.23	0.17	0.37	0.55	0.23	0.45	0.66	0.149914	0.157296	-0.444827	0.0737078	-0.137542	0.19405	0.594741	0.0210092	0.307285	0.120708	0.287456	0.109943
Unigene36256_All	4.41	4.64	5.27	4.12	3.48	3.91	2.79	3.02	3.95	2.02	5.28	2.88	-0.48748	4.76976e-13	-0.313072	1.15655e-06	-0.545619	2.25235e-15	-0.174409	0.00298544	-0.232547	0.000585847	0.0581385	0.112368
CL5513.Contig9_All	0.42	0.44	0.2	0.47	0.39	0.48	0.48	0.52	0.54	0.23	0.43	0.39	-0.00424785	0.220251	0.338991	0.0148526	0.546652	0.000363076	-0.343239	0.00782453	0.207661	0.0528836	-0.550899	0.000283224
CL11485.Contig1_All	7.74	8.71	4.55	9.79	8.49	10.74	1.39	4.54	4.83	2.13	4.6	3.61	-1.00819	1.48658e-29	0.470957	7.4487e-12	-0.945945	1.83052e-26	-1.47915	3.53655e-72	-1.4169	1.01629e-66	-0.0622458	0.138683
CL3530.Contig3_All	20.08	14.75	19.92	18.55	15.23	16.15	21.69	19.16	22	15.57	20.95	30.14	0.293101	2.03352e-20	-0.129261	7.09613e-05	0.207368	9.94431e-11	0.422362	6.76064e-39	0.336629	3.20668e-24	0.0857323	0.00180848
Unigene62192_All	0.52	0.17	0.7	0.26	0.69	0.48	0.39	0.43	0.39	0.34	0.68	0.25	-0.106808	0.177719	0.046652	0.220636	-0.180519	0.174294	-0.15346	0.106292	-0.227171	0.143068	0.0737105	0.200664
Unigene38117_All	0.32	0.34	0.42	0.59	0.69	0.62	0.87	0.95	0.93	0.26	0.52	0.55	0.308204	0.0240046	0.809916	4.95196e-07	1.35911	1.56577e-19	-0.501712	0.000287111	0.549196	1.30065e-05	-1.05091	1.01223e-13
CL2815.Contig6_All	0.63	1.09	0.34	0.56	1.02	0.89	0.75	1.13	0.72	0.16	0.3	0.45	-1.16309	1.45081e-12	0.263561	0.0140314	0.348069	0.00262434	-1.42665	9.88102e-20	0.0845079	0.131508	-1.51116	4.47206e-22
CL1744.Contig1_All	2.92	1.19	2.11	0.78	1.36	1.66	0.36	0.25	0.74	0.68	0.94	1.17	-1.14554	1.5804e-24	-0.709194	7.28803e-12	-2.19754	4.73957e-59	-0.436341	0.000131205	-1.48835	2.50082e-22	1.05201	9.54191e-11
Unigene29789_All	0.36	0.13	0.21	1.34	1.43	1.27	1.22	1.26	1.24	0.18	0.5	0.57	0.872515	0.000267374	2.54624	3.76685e-39	2.43351	1.64676e-34	-1.67372	3.85412e-24	-0.11273	0.10396	-1.56099	3.55975e-20
Unigene54847_All	0.39	0.88	0.36	1.27	1.25	1.06	0.71	0.76	0.8	0.2	0.5	0.49	-0.431867	0.0445055	1.14455	8.4338e-07	0.495667	0.0217989	-1.57642	2.49043e-10	-0.648885	0.00122768	-0.927534	0.000470114
CL1878.Contig20_All	1.13	0.53	1.32	1.06	0.81	0.92	0.73	2.43	1.44	4.16	3.9	5.69	2.20875	7.0205e-121	-0.0941226	0.134532	0.637848	1.64024e-07	2.30287	2.40925e-127	0.731971	4.37805e-09	1.5709	1.27628e-76
CL2990.Contig24_All	8.14	11.1	8.84	5.42	11.09	9.33	5.25	6.44	2.65	8.26	9.1	12.02	0.0748993	0.041623	-0.117704	0.0105525	-0.954633	4.26673e-51	0.192604	7.90963e-05	-0.836929	4.18397e-38	1.02953	5.79515e-61
Unigene80180_All	3.67	4.68	3.63	8.16	6.88	6.31	8.34	5.74	5.6	4.22	10.83	5.81	0.808516	9.84925e-27	0.837715	1.39143e-28	0.727622	3.38978e-21	-0.0291986	0.103763	-0.110093	0.0306446	0.0808943	0.0615386
CL2129.Contig9_All	1.05	0.45	0.81	0.41	0.73	0.74	0.25	0.57	0.51	0.33	0.48	0.24	-1.13367	1.97912e-18	-0.292088	0.00346861	-0.779536	1.44359e-10	-0.841584	2.30701e-10	-0.487448	7.30244e-05	-0.354137	0.00567146
CL2900.Contig43_All	0.37	0.16	0.33	0.31	0.19	0.4	0.09	0.17	0.2	0.18	0.6	0.53	0.623231	0.0034707	0.0684167	0.199962	-0.878034	0.00235614	0.554814	0.00422601	-0.946451	0.00107843	1.50126	7.62799e-08
CL1627.Contig8_All	6.95	9.79	3.92	5.54	2.93	3.45	2.8	3.52	2.57	3	6.81	5.53	-0.42534	1.82258e-18	-0.7899	8.79066e-52	-1.20833	1.22387e-102	0.364559	2.15668e-11	-0.418435	5.20012e-11	0.782994	1.40266e-38
CL989.Contig6_All	2.68	2.21	2.4	1.92	3.77	3.14	1.96	2.45	1.04	1.24	0.87	1.17	-1.14325	1.837e-26	0.276484	0.00042351	-0.40804	8.84967e-06	-1.41973	7.94075e-44	-0.684524	3.43215e-14	-0.735207	1.17619e-10
CL11324.Contig1_All	8.04	7.6	4.79	4.14	4	3.77	1.46	2.44	2.54	2.01	4.48	4.44	-0.894935	5.97749e-47	-0.775192	7.51749e-37	-1.65501	3.9459e-119	-0.119743	0.0163707	-0.879817	4.05179e-27	0.760074	4.0144e-20
CL11489.Contig3_All	3.95	4.16	3.82	6.48	3.5	5.05	3.83	3.65	4.72	2.18	3.88	2.94	-0.397953	3.20207e-07	0.338853	8.82122e-07	0.0425591	0.159522	-0.736806	9.46053e-23	-0.296294	1.26128e-05	-0.440512	1.77302e-08
Unigene65524_All	3.27	3.75	1.59	6.18	2.85	4.75	9.66	5.25	8.9	1.97	1.83	4.04	-0.116524	0.0833225	0.684758	3.94154e-11	1.48139	6.56391e-59	-0.801282	1.8689e-14	0.796627	9.98721e-23	-1.59791	5.76123e-66
CL1793.Contig29_All	1.8	2.15	1.62	5.36	4.25	2.74	4.31	7.47	8.89	1.07	2.21	1.49	-0.221456	0.00195167	1.15094	1.3469e-72	1.89869	7.63633e-251	-1.37239	6.47077e-96	0.747749	3.40222e-59	-2.12014	7.75124e-291
CL9026.Contig3_All	2.53	2	2.34	2.53	2.82	2.88	2.01	2.32	2.74	1.23	2.45	1.39	-0.431508	7.9243e-06	0.262173	0.00134995	0.0496028	0.166032	-0.693682	2.25722e-13	-0.212571	0.00609076	-0.481111	7.60188e-07
CL11443.Contig8_All	19.96	20.58	22.45	37.67	21.68	20.32	40.85	35.02	44.32	13.8	25.67	30.45	0.157342	2.57653e-09	0.342914	3.87209e-39	0.93845	0	-0.185572	8.94244e-14	0.595536	7.38727e-157	-0.781108	9.38987e-254
CL6817.Contig3_All	12.9	13.73	14.06	21.5	19.26	17.95	14.3	19.46	16.23	8.48	15.6	15.23	-0.0361067	0.11913	0.534117	2.85719e-29	0.314256	1.34518e-10	-0.570224	2.99246e-33	-0.219861	5.72749e-07	-0.350363	1.03732e-12
CL464.Contig13_All	14.61	29	22.07	53	22.47	19.96	65.56	35.87	38.66	20.06	43.25	56.95	0.887999	9.86817e-141	0.545914	3.75409e-48	1.10603	3.62636e-232	0.342085	4.35018e-27	0.560119	5.51871e-73	-0.218035	4.02412e-14
CL4976.Contig11_All	90.45	61.11	127.26	39.07	14.24	24.9	9.42	23.69	20.75	99.79	196.56	147.8	0.679969	0	-1.82873	0	-2.35717	0	2.50869	0	-0.528448	4.3917e-55	3.03714	0
CL106.Contig1_All	4.25	9.19	4.2	10.65	6.56	4.05	17.75	10.42	15.28	6.91	10.96	3.08	0.249748	2.67738e-07	0.27209	2.89491e-08	1.30382	1.68996e-212	-0.0223421	0.101569	1.03173	1.86373e-146	-1.05407	1.09408e-152
Unigene26837_All	1.27	1.37	1.05	2.47	2.98	2.69	1.04	2.99	2.76	0.95	0.89	2.36	0.198572	0.0417323	1.14126	1.02169e-21	0.894189	5.40339e-13	-0.942689	8.68889e-17	-0.247072	0.00561765	-0.695617	3.78572e-09
CL3601.Contig10_All	1.72	2.27	2.1	2.05	3.43	3.43	1.14	3.03	3.76	0.94	1.76	2.25	-0.295517	4.27413e-05	0.548988	9.28299e-17	0.390175	6.37534e-09	-0.844505	3.19356e-34	-0.158812	0.00382248	-0.685692	8.60931e-22
Unigene25906_All	187.97	156.15	190.55	90.51	53.85	157.83	126.87	226.21	217.36	208.18	372.63	178.59	0.507508	0	-0.821496	0	0.100904	3.44021e-51	1.329	0	0.9224	0	0.406604	0
CL13955.Contig1_All	0.67	0.66	0.51	1.32	1.15	1.06	1.2	0.48	0.44	0.27	0.43	0.79	-0.3093	0.0430909	0.938588	7.9348e-08	0.203475	0.0946609	-1.24789	9.72123e-12	-0.735113	1.00404e-05	-0.512775	0.0053302
CL3337.Contig2_All	7.43	8.24	13.77	13.8	15.76	25.69	6.51	21.01	18.13	2.79	7.18	5.34	-0.941866	8.51762e-146	0.907929	2.13416e-254	0.642327	1.13353e-116	-1.84979	0	-0.265602	1.13427e-28	-1.58419	0
CL2803.Contig10_All	4.52	1.32	4.46	0.74	2.49	2.89	0.44	1.22	0.84	0.37	1.07	1.07	-2.0308	1.27481e-115	-0.750587	6.48292e-26	-2.02716	2.82347e-114	-1.28021	4.90759e-37	-1.27657	3.96025e-36	-0.00363626	0.227746
Unigene20023_All	1.33	0.72	0.97	1.1	1.62	1.79	0.52	0.69	0.67	0.45	0.78	0.27	-0.996344	1.08481e-10	0.584862	5.0682e-07	-0.666586	3.73709e-06	-1.58121	2.89924e-29	-1.25145	1.22306e-20	-0.329759	0.0182472
CL7065.Contig8_All	4.75	4.86	4.03	6.99	5.45	5.69	4.71	4.76	5.77	3.07	5.63	5.49	0.0652403	0.0837038	0.41402	4.85424e-11	0.169067	0.00417714	-0.348779	7.61481e-09	-0.244953	3.49952e-05	-0.103827	0.0324585
CL8125.Contig6_All	4.27	3.46	2.36	2.57	3.83	5.03	1.25	3.13	2.91	1.05	2.32	1.18	-1.14846	2.51626e-123	0.1795	1.73225e-06	-0.461649	1.65911e-26	-1.32796	6.18401e-175	-0.641149	2.43012e-52	-0.686812	1.00379e-38
CL9620.Contig5_All	0.72	0.62	0.54	0.24	0.51	0.63	0.48	0.32	0.27	0.08	0.09	0.06	-3.01416	1.19834e-22	-0.435458	0.0094012	-0.801848	6.79975e-05	-2.57871	3.24945e-15	-0.366391	0.0332903	-2.21232	2.6619e-10
Unigene1431_All	143.6	71.09	161	52.02	20.74	27.52	52.91	47.76	61.28	139.75	233.25	209.87	0.645041	0	-1.8993	0	-1.20109	0	2.54434	0	0.698214	6.74666e-144	1.84613	0
CL851.Contig4_All	0.99	1.44	1.28	1.43	1.11	1.67	0.94	0.54	1.79	0.41	0.65	0.81	-0.976361	5.79613e-12	0.189956	0.0327159	-0.175227	0.0517899	-1.16632	1.72585e-17	-0.365183	0.00104542	-0.801135	3.29451e-08
Unigene19569_All	2.54	3.05	1.97	1.07	0.89	1.22	0.3	0.78	1.17	1.18	0.66	0.6	-1.62451	1.38487e-45	-1.24703	5.349e-31	-1.73539	2.39016e-49	-0.377487	0.00159889	-0.488364	0.000334106	0.110878	0.120784
CL14.Contig3_All	1.37	1.1	0.75	1.31	0.93	1.67	0.86	1.78	1.12	0.87	1.95	1.97	0.588672	3.31769e-05	0.2891	0.0215719	0.250792	0.0378816	0.299572	0.00666421	-0.0383081	0.200241	0.33788	0.00603602
CL2450.Contig4_All	3.74	2.01	2.71	3.37	3.25	4.62	1.19	2.5	2.77	1.04	2.13	1.89	-0.739471	1.96428e-34	0.411584	8.99124e-17	-0.381716	1.50775e-11	-1.15105	5.24404e-93	-0.7933	4.06516e-50	-0.357755	1.63662e-08
Unigene7908_All	0.84	0.94	0.61	1.97	0.98	2.56	2.34	2.19	1.48	0.45	1.54	1.34	0.483197	3.21203e-05	1.20773	1.07499e-28	1.33621	4.33543e-36	-0.724533	1.16096e-13	0.128477	0.0414702	-0.85301	1.76062e-18
Unigene50091_All	1.4	1.85	0.92	1.85	1.07	1.13	1.07	1.63	1.38	0.91	1.08	1.67	-0.180958	0.0398235	-0.0411863	0.186278	-0.019025	0.232016	-0.139771	0.0452139	0.0221613	0.212308	-0.161933	0.054503
CL322.Contig1_All	1.47	0.98	1.37	0.89	0.96	1.17	0.88	1.2	1.2	1.06	1.83	1.51	0.209506	0.0111414	-0.33402	0.00105041	-0.214954	0.0169252	0.543526	1.0377e-07	0.119067	0.085785	0.424459	2.23838e-05
CL6273.Contig10_All	25.38	21.56	22.47	15.21	13.84	8.92	8.29	14.77	12.3	9.96	19.17	17.23	-0.572058	1.69352e-49	-0.865532	1.18223e-99	-0.957987	1.55737e-117	0.293474	1.96167e-11	-0.0924553	0.0178833	0.385929	2.27378e-17
CL11432.Contig1_All	4.59	3.72	3.45	5.13	6.13	7.49	2.36	3.18	3.01	1.51	1.99	1.9	-1.10955	1.18155e-21	0.676836	2.10782e-15	-0.444591	9.82092e-06	-1.78638	8.2419e-67	-1.12143	1.51495e-33	-0.664957	6.46274e-08
Unigene9300_All	0.32	0.47	0.28	0.43	0.32	0.56	0.37	0.32	0.38	0.31	0.5	0.43	0.217763	0.0462673	0.291483	0.0212623	0.000190915	0.25746	-0.0737205	0.100014	-0.291292	0.0215992	0.217572	0.0488215
Unigene26504_All	8.44	3.5	7.31	3.66	2.32	5.24	3.73	2.7	3.53	3	11.79	10.33	0.393562	3.36745e-12	-0.774365	3.11806e-28	-0.941526	1.5704e-38	1.16793	2.21996e-71	-0.167161	0.0143821	1.33509	7.49529e-87
CL4629.Contig8_All	3.32	4.66	2.31	4.43	4.54	4.28	4.48	5.86	3.94	1.98	5.46	4.55	0.227065	0.000461276	0.367363	6.04272e-08	0.483022	8.36761e-13	-0.140298	0.00646181	0.115659	0.022268	-0.255957	3.51287e-05
CL1174.Contig7_All	0.62	0.42	0.68	1.1	0.51	0.59	0.78	0.52	0.51	0.61	0.97	0.84	0.500632	0.000591414	0.36795	0.00844209	0.0882482	0.169249	0.132682	0.0620412	-0.279702	0.0263732	0.412384	0.00297207
Unigene15013_All	147.66	167.73	170.5	131.72	119.83	143	45.45	117.02	107.2	73.86	136.94	139.6	-0.463253	3.00326e-295	-0.297347	4.89301e-129	-0.83558	0	-0.165906	4.11515e-36	-0.538233	0	0.372327	4.63935e-143
Unigene771_All	0.31	0.23	0.22	0.2	0.35	0.41	0.13	0.24	0.2	0.17	0.24	0.09	-0.607748	0.008613	0.338693	0.0458617	-0.391462	0.0469426	-0.94644	7.12015e-05	-0.730154	0.00156794	-0.216286	0.119457
CL9883.Contig1_All	16.22	12.6	13	10.24	23.83	16.84	5.22	16.16	12.37	3.68	7.38	5.34	-1.34213	3.09909e-139	0.286168	9.20275e-13	-0.293178	3.60184e-11	-1.6283	2.17114e-225	-0.579347	5.1706e-42	-1.04895	2.53589e-77
Unigene13631_All	0.7	0.74	0.45	0.55	1.57	1.47	0.31	1.08	0.88	0.24	0.56	0.41	-0.639952	0.000397296	0.929813	3.6576e-10	0.278115	0.0325002	-1.56976	2.66853e-21	-0.651698	2.77837e-06	-0.918067	4.69939e-07
CL7932.Contig10_All	2.06	1.19	1.47	1.23	0.45	0.78	0.3	0.65	0.3	0.5	1.23	0.54	-1.03022	6.42922e-05	-0.928953	0.00024157	-1.86612	2.73068e-09	-0.101267	0.117726	-0.937167	0.00440072	0.835899	0.00862305
CL3497.Contig11_All	0.85	0.28	0.54	0.52	0.81	0.28	0.5	0.96	0.49	0.54	0.8	0.51	0.13777	0.0541141	-0.0666785	0.146875	0.226263	0.0127871	0.204448	0.0116392	0.292942	0.00274409	-0.0884935	0.103493
CL7593.Contig6_All	1.06	0.85	0.87	1.42	1.31	1.61	0.77	0.85	1.34	0.73	1.74	0.79	0.235387	0.0107287	0.64413	5.6833e-10	0.0953619	0.119948	-0.408744	1.19252e-05	-0.548768	6.87654e-08	0.140025	0.0567623
CL514.Contig3_All	3.7	4.07	4.51	9.6	7.47	5.71	5.63	7.32	6.89	1.99	5.29	4.41	-0.061512	0.0994501	0.896589	7.0739e-47	0.704536	8.79646e-28	-0.958101	7.66425e-53	-0.192053	0.000214333	-0.766048	4.7046e-32
CL15141.Contig2_All	2.08	2.84	1.6	2.17	1.63	2.04	1.33	1.67	1.97	1.24	2.72	3.02	0.10699	0.0648693	-0.153257	0.0359592	-0.380855	8.65565e-05	0.260247	0.00134539	-0.227598	0.0101224	0.487844	4.88427e-07
Unigene20659_All	726.78	303.62	965.65	403.48	102.06	299.34	104.97	364.01	336.06	332.01	528.66	452.72	-0.599391	0	-1.306	0	-1.29838	0	0.706605	0	0.00761465	0.0786374	0.69899	0
CL1867.Contig31_All	0.84	0.98	1.07	1.82	1.67	2.93	0.99	1.03	1.17	0.83	0.74	1.09	-0.117888	0.067846	1.15308	8.1662e-42	0.148358	0.0460012	-1.27097	4.28422e-49	-1.00473	1.28248e-33	-0.266246	0.00328036
Unigene32915_All	1.44	1.14	0.45	0.6	2.23	1.38	0.44	0.45	0.75	0.58	0.54	0.19	-1.20264	2.23317e-16	0.474312	8.42916e-06	-0.877436	2.3409e-10	-1.67695	2.6355e-35	-1.35175	1.19124e-25	-0.325201	0.0174776
Unigene45487_All	0.32	0.2	0.4	0.17	0.24	0.1	0.02	0.04	0.05	0.09	0.04	0.03	-2.49628	5.15658e-08	-0.850275	0.00577842	-3.03656	2.9332e-09	-1.64601	0.000533914	-2.18629	0.000121386	0.540278	0.126212
CL16512.Contig2_All	5.09	3.82	4.85	5.33	4.89	5.86	3.49	5.25	5.48	1.73	3.04	2.95	-0.832867	3.22986e-92	0.225441	2.42864e-11	0.0530666	0.0425057	-1.05831	7.47277e-160	-0.172375	1.92678e-07	-0.885934	1.56608e-105
CL8434.Contig4_All	2.22	2.23	2.56	4.38	3.14	3.05	1.85	2.58	2.04	0.87	2.78	2.09	-0.283991	0.00128738	0.594943	1.45349e-12	-0.105227	0.0827998	-0.878934	1.64154e-23	-0.70017	4.47285e-16	-0.178764	0.0220182
CL1995.Contig3_All	2.62	1.58	2.22	3.69	2.64	2.36	3.24	2.12	1.13	0.58	1.48	1.39	-0.891962	5.42583e-20	0.437793	1.08163e-08	0.0207363	0.215381	-1.32975	6.69563e-49	-0.417056	4.6617e-08	-0.912698	7.38384e-21
CL3524.Contig16_All	16.25	9.49	19.04	13.24	9.02	12.35	7.11	15.83	9.82	9.65	11.2	8.89	-0.587725	3.61198e-92	-0.369437	4.43911e-40	-0.440234	1.19742e-54	-0.218288	4.02086e-13	-0.0707973	0.00655965	-0.147491	1.02006e-06
CL543.Contig30_All	0.1	0.39	0.3	0.67	0.57	0.76	0.6	0.6	0.38	0.16	0.14	0.11	-0.952601	0.000396456	1.33721	8.05452e-12	1.00484	8.41435e-07	-2.28981	2.45916e-23	-0.332366	0.0149268	-1.95744	1.31525e-15
CL1996.Contig4_All	5.32	6.15	6.34	9.55	8.16	5.6	9.5	8.52	8.23	3.66	10.93	10.95	0.526222	1.20502e-29	0.390573	2.46307e-16	0.566118	4.58559e-34	0.135649	0.000391466	0.175545	2.48341e-05	-0.0398956	0.0905994
CL9833.Contig5_All	3.58	2.21	3.03	3.36	4.24	4.12	2	3.43	3.97	1.25	2.52	2.02	-0.602632	5.90643e-17	0.412356	8.64297e-12	0.100536	0.0386476	-1.01499	2.35823e-51	-0.31182	1.12496e-07	-0.703168	5.5289e-23
CL2033.Contig5_All	0.64	1.31	0.42	2.41	2.01	1.64	1.05	1.85	2.16	0.2	0.37	0.44	-1.22361	1.33114e-22	1.35224	4.23585e-63	1.09882	8.93478e-39	-2.57585	1.58281e-148	-0.253427	6.46605e-05	-2.32242	2.14062e-110
CL1473.Contig12_All	0.44	0.23	0.46	0.51	0.27	0.46	0.21	0.61	0.7	0.39	0.39	0.55	0.238628	0.0415486	0.130475	0.120806	0.434865	0.00297411	0.108153	0.0825506	0.304389	0.0182247	-0.196237	0.0571422
Unigene57609_All	0.82	1.53	0.73	1.74	1.18	1.46	2.05	1.64	1.66	0.68	1.66	1.71	0.412696	0.00913812	0.512999	0.00240879	0.815159	2.76417e-06	-0.100303	0.0906694	0.302161	0.0209679	-0.402464	0.00505785
CL5619.Contig1_All	1.6	1.03	1.43	1.18	1.31	1.49	0.39	0.94	1.16	0.88	0.69	1.2	-0.542693	1.0882e-07	-0.0305361	0.189346	-0.696143	8.6439e-11	-0.512157	3.23416e-07	-0.665607	6.3718e-10	0.153449	0.0539353
CL6844.Contig1_All	1.32	0.69	0.88	1.02	1.11	0.56	0.68	1.19	1.47	0.79	1.07	0.74	-0.136941	0.117027	-0.0963337	0.160306	0.227588	0.0664003	-0.0406071	0.129695	0.323922	0.0258285	-0.364529	0.015343
CL6868.Contig3_All	0.8	0.59	0.63	2.14	2.41	1.92	1.22	1.8	1.61	0.35	0.44	0.55	-0.583517	1.4321e-05	1.68773	1.46833e-69	1.2099	3.0451e-31	-2.27125	5.66952e-103	-0.47783	4.76546e-10	-1.79342	6.66029e-55
Unigene49678_All	1.65	3.07	1.15	3.8	4.11	2.75	2.32	3.43	4.33	1.47	3.46	2.89	0.415522	9.69037e-10	0.859931	1.01048e-40	0.784236	3.05006e-33	-0.444409	3.07897e-14	-0.0756953	0.0526706	-0.368714	6.12236e-10
CL10284.Contig3_All	0.45	0.85	0.41	0.32	0.71	0.84	0.5	0.61	0.79	0.36	0.59	0.46	-0.278024	0.0614217	0.123612	0.150078	0.164722	0.130462	-0.401636	0.0145302	0.0411104	0.210264	-0.442747	0.015911
CL14000.Contig1_All	7.04	8.91	6.71	11.54	12.04	10.93	14.52	9.72	13.67	7.88	14.04	13.96	0.677127	3.0882e-26	0.611703	3.96314e-21	0.756475	9.78822e-33	0.0654241	0.0432607	0.144772	0.00404856	-0.079348	0.0442955
CL1742.Contig5_All	3.65	4.06	4.22	6.92	5.61	5.44	5.54	5.48	5.03	1.93	4.94	2.5	-0.340273	1.12256e-05	0.595244	6.93664e-18	0.43846	4.8819e-10	-0.935517	1.34269e-37	-0.156784	0.00527902	-0.778733	4.99105e-25
CL4518.Contig5_All	11.65	12.28	12.27	12.98	12.53	13.99	7.81	13.48	11.96	5.58	10.25	7.62	-0.622316	5.67391e-66	0.12825	2.63484e-05	-0.112928	0.000304258	-0.750566	1.33081e-99	-0.241178	1.03507e-13	-0.509388	5.58783e-43
CL2889.Contig6_All	4.73	3.42	5.46	7.05	10.55	3.78	2.32	6.68	7.75	3.02	3.29	4.08	-0.3814	3.17608e-09	0.653954	1.84955e-32	0.312344	5.36276e-08	-1.03535	8.06875e-70	-0.341609	4.24578e-11	-0.693744	9.38304e-29
CL3729.Contig7_All	2.56	1.65	0.92	3.49	4.57	2.1	0.48	1.67	2.19	0.94	1.02	0.55	-1.03071	7.27201e-44	0.988345	5.10306e-79	-0.231898	0.000156274	-2.01905	6.4522e-229	-1.22024	7.42134e-110	-0.798807	4.81851e-25
CL759.Contig12_All	1.92	3.19	2.3	4.3	1.24	2.97	0.72	3.14	2.99	0.96	1.78	3.31	-0.282908	0.001473	0.204266	0.00880154	-0.0966079	0.0951025	-0.487174	1.05438e-07	-0.300874	0.000524099	-0.1863	0.0195855
CL13254.Contig3_All	3.29	1.76	2.21	1.97	2.45	2.65	0.47	1.89	1.56	0.41	0.83	0.49	-2.07334	1.78038e-160	-0.0361821	0.134244	-0.878157	1.76872e-44	-2.03716	2.54915e-153	-0.841975	1.84332e-40	-1.19519	1.42873e-40
CL3147.Contig10_All	3.69	3.85	0.86	2.52	2.64	1.78	1.75	1.64	1.24	2.2	6.37	4.04	0.605874	6.96345e-06	-0.26878	0.0315317	-0.835479	2.2013e-06	0.874654	9.18844e-10	-0.566699	0.00114653	1.44135	7.85236e-19
CL1092.Contig52_All	4.38	2.23	4.35	2.61	2.57	2.07	1.14	3.04	2.18	2.5	3.62	3.29	-0.212048	0.0047518	-0.592957	1.59657e-10	-0.770107	1.45687e-15	0.380909	2.03396e-05	-0.17715	0.0307341	0.558059	1.32598e-08
CL860.Contig11_All	2.5	2.31	2.82	2.76	0.81	2.78	2.7	3.1	1.37	1.51	3.47	3.41	0.14664	0.0209215	-0.262179	0.0011884	-0.0769327	0.10932	0.408818	5.36653e-07	0.185246	0.01316	0.223572	0.00253001
CL2411.Contig7_All	2.19	0.87	1.71	0.59	0.7	0.65	0.11	0.41	0.37	0.52	0.68	0.86	-1.19471	1.43469e-08	-1.29198	2.46981e-09	-2.40441	1.94043e-19	0.0972639	0.112754	-1.11243	0.000363096	1.20969	8.80665e-05
CL10142.Contig12_All	4.78	3.77	5.54	6.72	6.16	6.62	3.51	4.69	4.6	3.13	5.11	4.28	-0.148715	0.0539979	0.476945	3.28345e-06	-0.112028	0.101184	-0.62566	2.28125e-09	-0.588973	3.05183e-08	-0.0366871	0.18257
Unigene24241_All	0.47	0.42	0.77	0.53	0.34	0.54	0.16	0.35	0.49	0.32	0.47	0.45	-0.409361	0.00852144	-0.232618	0.0588572	-0.730625	0.000107737	-0.176743	0.0602729	-0.498008	0.0057323	0.321265	0.0372439
CL7329.Contig1_All	2.88	2.28	2.56	2.44	3.63	3.57	1.85	2.52	2.3	1.18	2.03	1.78	-0.616341	1.2327e-07	0.324823	0.000585797	-0.195397	0.0270746	-0.941163	3.61654e-17	-0.52022	4.71365e-07	-0.420943	0.000265854
CL15664.Contig18_All	0.37	0.29	0.47	0.71	0.76	0.57	0.33	0.78	0.64	0.39	0.46	0.58	0.32745	0.0237639	0.840255	7.77719e-07	0.63165	0.000221329	-0.512806	0.000394936	-0.208605	0.054299	-0.304201	0.0221817
CL13107.Contig3_All	1.91	0.77	0.9	1.33	0.87	1.49	0.35	0.65	1.05	0.18	0.25	0.11	-2.7557	4.84482e-103	0.0481119	0.143203	-0.804673	1.20342e-18	-2.80381	1.2497e-108	-0.852785	5.41215e-21	-1.95103	4.49361e-40
Unigene4914_All	1.19	1.39	1.49	1.67	1.4	1.05	1.96	2.2	1.64	1.28	2.27	1.63	0.350948	0.00170745	0.0174106	0.220599	0.518733	1.13853e-05	0.333537	0.00156285	0.501323	1.94131e-05	-0.167786	0.0407595
CL321.Contig1_All	2.68	1.48	2.36	2.35	2.02	2.54	0.91	2.23	3.09	0.57	0.9	0.68	-1.59829	1.31257e-40	0.086125	0.0937452	-0.0582557	0.149905	-1.68441	1.83933e-46	-0.144381	0.0343791	-1.54003	6.22935e-37
CL7109.Contig11_All	13.54	4.53	15.45	4.91	4.57	4.82	1.15	1.76	2.13	3.9	4.9	4.09	-1.37191	2.33508e-166	-1.22589	3.66858e-139	-2.72251	0	-0.146021	0.00346531	-1.49662	4.81804e-81	1.3506	1.24621e-63
Unigene14739_All	0.16	0.28	0.08	0.67	0.16	0.68	0.28	0.74	0.4	0.12	0.16	0.23	-0.0136987	0.220174	1.54975	0.000147881	1.48161	0.000321912	-1.56344	6.96587e-05	-0.0681339	0.208466	-1.49531	0.000250754
CL6793.Contig6_All	46.75	71	38.19	96.8	70.15	82.52	61.94	79.62	62.59	16.69	35.3	53.9	-0.545616	1.95333e-100	0.682109	2.51855e-236	0.402647	1.07572e-75	-1.22772	0	-0.279462	8.46678e-47	-0.948263	0
CL4176.Contig4_All	0.74	0.25	0.54	0.31	0.48	0.33	0.33	0.4	0.81	0.15	0.45	0.27	-0.81858	1.28264e-07	-0.46377	0.000800415	0.0124588	0.244126	-0.35481	0.00741395	0.476229	0.000621089	-0.831038	9.04613e-08
Unigene12258_All	0.3	0.5	0.17	0.5	1.93	1.2	0.77	1.02	0.8	0.1	0.45	0.47	0.0957207	0.176351	1.91292	2.0203e-16	1.43791	8.89649e-09	-1.8172	7.5522e-16	-0.475014	0.00338328	-1.34219	3.59354e-08
CL4290.Contig10_All	12.1	9.52	9.7	9.69	7.02	9	7.33	7.34	8.51	6.29	8.2	7.83	-0.482809	5.5401e-29	-0.281434	1.20033e-11	-0.426851	3.32216e-23	-0.201374	2.31303e-06	-0.145416	0.000528359	-0.0559583	0.0626766
Unigene1563_All	11.63	18.31	15.74	31.45	17.73	19.02	59	36.01	38.64	15.61	25.67	33.37	0.722058	1.93576e-69	0.583866	1.11587e-43	1.56097	0	0.138192	4.33488e-05	0.9771	2.8534e-202	-0.838908	7.22205e-158
CL9796.Contig1_All	0.2	0.17	0.1	0.57	0.47	0.54	0.24	0.3	0.34	0.17	0.23	0.16	0.266409	0.14427	1.74949	6.84317e-06	0.905211	0.0181477	-1.48308	2.63908e-05	-0.84428	0.005192	-0.638802	0.0425365
CL16428.Contig55_All	6.08	2.57	4.11	2.23	6.23	8.43	2.66	3.96	5.59	1.73	1.87	2.12	-1.15369	2.09883e-88	0.405251	4.57562e-20	-0.0565525	0.0735964	-1.55894	6.01714e-184	-0.461804	6.55474e-25	-1.09714	2.94185e-78
CL2606.Contig9_All	2.77	1.97	2.59	1.88	2.62	2.64	0.55	2.15	1.93	0.7	1.48	0.99	-1.2048	2.88049e-44	-0.0358569	0.158839	-0.649929	1.21346e-16	-1.16894	1.4453e-41	-0.614072	7.26003e-15	-0.554871	5.10024e-09
Unigene1315_All	0.41	0.4	0.53	1.33	0.93	0.65	0.7	1.05	0.97	0.29	0.74	0.52	0.219113	0.0658559	1.13275	4.56004e-12	1.03893	4.04203e-10	-0.913634	2.3702e-09	-0.0938217	0.132973	-0.819812	1.82528e-07
Unigene32847_All	11.53	12.61	9.32	17.64	19.05	14.09	16.01	12.19	16.87	5.7	10.32	10.25	-0.341944	1.65225e-14	0.60473	3.96229e-56	0.436832	1.72884e-28	-0.946674	4.52408e-121	-0.167898	1.17877e-06	-0.778776	1.81601e-77
Unigene8703_All	3.2	4.67	3.15	3.29	3.12	2.12	3.15	5.46	5.3	4.44	3.53	3.7	0.0853275	0.00814666	-0.369158	1.20527e-18	0.34159	3.54376e-20	0.454485	1.44261e-28	0.710748	1.63379e-71	-0.256263	1.42317e-12
Unigene31715_All	12.99	23.17	12.09	32.49	25.64	26.59	12.49	35.31	41.14	6.72	8.27	10.69	-0.900598	4.6778e-97	0.815852	1.30436e-142	0.895376	1.31038e-175	-1.71645	0	0.0795247	0.00147621	-1.79597	0
Unigene14706_All	5.47	4.17	5.12	4.56	2.45	3	2.18	3.94	5.69	3.48	5.19	2.68	-0.37399	6.12703e-09	-0.55625	2.23833e-16	-0.311281	9.83547e-07	0.182261	0.00232551	0.244969	0.000277761	-0.0627083	0.0956637
Unigene65162_All	0.8	1.03	0.52	1.09	0.69	0.7	0.59	0.96	0.53	0.47	1.24	1.97	0.660483	5.52845e-06	0.0876898	0.156512	-0.158063	0.108704	0.572793	2.9643e-05	-0.245752	0.0467398	0.818545	7.98841e-08
CL3387.Contig10_All	3.65	2.5	2.86	2.88	3.93	2.92	1.26	2.92	2.72	1.5	2.71	1.71	-0.604396	2.84135e-22	0.112053	0.0140239	-0.376501	2.72609e-10	-0.71645	6.55151e-32	-0.488555	1.25007e-16	-0.227895	0.000244556
Unigene64166_All	0.65	0.84	0.22	0.91	1.42	0.42	0.92	2.2	1.55	0.98	1.7	1.63	1.33976	1.49918e-30	0.690828	7.1744e-08	1.46213	4.44965e-37	0.648934	1.11001e-10	0.771299	2.81933e-14	-0.122365	0.0491333
Unigene15449_All	0.62	1.5	1.24	1.94	2.71	1.74	0.95	2.01	1.21	0.62	0.9	1.09	-0.361515	0.00139422	0.926304	5.53023e-20	0.31962	0.00183114	-1.28782	2.6818e-33	-0.606684	1.7716e-10	-0.681136	6.7328e-09
Unigene45617_All	5.51	10.79	6.84	12.49	10.42	7.55	8.24	9.85	12.17	4.43	9.64	10.44	0.0955076	0.0368685	0.401533	3.06475e-11	0.400876	3.68238e-11	-0.306025	8.62338e-08	-0.000657049	0.239876	-0.305368	1.72422e-07
Unigene50933_All	0.11	0.22	0.34	0.78	0.89	0.62	1.33	1.37	0.45	0.33	0.11	0.43	0.401339	0.1136	1.77485	1.9623e-05	2.26005	9.08459e-09	-1.37351	0.00014709	0.485207	0.030626	-1.85872	2.71188e-07
CL594.Contig48_All	0.19	0.37	0.22	0.31	0.17	0.14	0.35	0.17	0.16	0.2	0.45	0.4	0.428514	0.00541316	-0.331892	0.0333099	-0.185999	0.105622	0.760406	1.68172e-05	0.145894	0.132504	0.614513	0.000377429
Unigene42152_All	2.66	3.1	1.99	1.33	1.41	1.21	0.41	1.07	1.12	0.98	1.52	1.11	-1.09305	1.42913e-17	-0.969961	1.25008e-14	-1.5541	1.52681e-28	-0.123086	0.0686513	-0.584139	0.000183976	0.461053	0.00216656
CL4679.Contig6_All	1.18	1.42	1.21	0.56	1.27	0.73	2.4	2.71	1.5	0.67	0.98	0.52	-0.80943	6.20513e-08	-0.568982	5.15117e-05	0.805145	3.4217e-12	-0.240448	0.0270884	1.37413	1.47313e-26	-1.61458	1.67413e-33
CL3428.Contig4_All	2.96	2.49	2.77	2.48	1.72	2.83	0.94	1.29	1.91	1.03	2.01	1.15	-0.968221	2.43282e-31	-0.221949	0.000961133	-0.983446	9.52416e-32	-0.746271	2.29833e-18	-0.761497	2.05029e-18	0.0152251	0.207365
CL1455.Contig11_All	1.81	1.03	2.32	1.8	0.67	1.08	3.24	2.39	1.66	2.08	3.55	3.64	0.852117	2.35733e-18	-0.532895	9.34834e-06	0.506411	6.72021e-07	1.38501	2.91646e-38	1.03931	1.16867e-19	0.345705	4.89201e-05
Unigene65762_All	2.84	2.3	2.85	2.92	3.28	2.49	1.1	2.41	2.67	1.33	2.85	2.33	-0.287807	0.000503673	0.123837	0.0429119	-0.358179	4.54318e-05	-0.411644	8.36276e-07	-0.482016	4.79141e-08	0.0703719	0.118604
CL15540.Contig1_All	1.03	1.67	0.43	0.27	0.82	0.42	1.21	1.05	0.77	0.32	1.28	1.26	-0.106693	0.150661	-1.03154	4.94432e-05	-0.0225549	0.242172	0.924849	0.000143911	1.00899	7.68209e-05	-0.0841384	0.172525
CL16055.Contig14_All	1.89	1.08	2.78	1.21	1.78	0.95	2.19	0.76	1.25	1.26	1.53	2.99	0.0120222	0.197227	-0.548164	3.02119e-12	-0.455418	3.30201e-09	0.560186	3.91537e-13	0.0927463	0.0797103	0.46744	9.81411e-10
CL3490.Contig5_All	1.57	1.43	1	2.72	2.2	2.76	4.72	2.26	2.69	1.03	2.45	1.6	0.360091	0.00815675	0.946686	9.77588e-11	1.28856	2.51583e-20	-0.586595	5.63993e-06	0.341871	0.00151735	-0.928466	8.08778e-13
CL7628.Contig3_All	2.39	1.67	2.08	2.47	2.62	3.63	0.58	1.35	1.09	0.67	1.61	1.24	-0.802892	3.48645e-21	0.504731	9.46058e-14	-1.01564	3.40742e-30	-1.30762	5.29542e-63	-1.52037	2.39715e-77	0.212746	0.0113162
CL8279.Contig1_All	3.9	4.04	3.34	2.84	4.5	4.79	1.69	2.7	3.19	1.64	2.63	2.07	-0.824205	2.34524e-40	0.106176	0.0146003	-0.564709	2.10246e-21	-0.930382	5.34212e-53	-0.670885	2.03371e-30	-0.259497	6.0242e-05
CL15604.Contig3_All	2.42	1.01	1.16	2.65	3.34	3.84	2.12	3	2.03	0.56	1.43	0.89	-0.666698	6.88946e-17	1.099	2.50786e-76	0.645191	1.03323e-23	-1.76569	1.02952e-155	-0.453805	1.20051e-17	-1.31189	5.48474e-74
CL4790.Contig13_All	2.31	3.92	1.43	4.6	6.02	3.97	4.58	4.96	4.9	2.03	2.67	3.53	0.111651	0.0353899	0.931615	2.21815e-47	0.921789	3.92481e-46	-0.819964	4.31482e-39	-0.0098263	0.21246	-0.810137	1.27051e-37
CL12390.Contig1_All	2.85	2.37	2.41	1.99	4.09	2.71	1.02	3.94	3.18	0.52	1.9	1.31	-1.01819	5.76579e-12	0.208731	0.026788	0.114882	0.104505	-1.22692	7.28228e-18	-0.0938483	0.117056	-1.13307	8.73135e-15
CL5879.Contig5_All	0.95	1.07	0.78	1.57	1.03	1	0.94	1.04	1.15	0.54	1.42	1.83	0.442311	4.48323e-08	0.369286	5.54814e-06	0.168992	0.0181744	0.0730257	0.0576847	-0.200294	0.00518839	0.27332	0.00026714
CL1792.Contig11_All	2.53	2.91	3.84	7.01	2.63	3.17	3.57	5.02	4.94	3.69	3.95	3.55	0.276059	5.73453e-05	0.469372	1.98853e-11	0.553309	1.67675e-15	-0.193313	0.000829841	0.0839367	0.0564792	-0.27725	1.23611e-05
CL3532.Contig9_All	6.82	12.13	6.46	13.16	12.87	11.82	14.13	12.61	13.81	3.66	7.52	9.05	-0.323316	3.01427e-14	0.577451	3.31252e-55	0.680004	2.74146e-78	-0.900767	5.63789e-119	0.102553	0.000710506	-1.00332	1.86632e-151
CL4725.Contig13_All	5.34	7.4	5.86	7.8	7.64	6.21	9.76	8.23	8.34	3.71	6	6.32	-0.211081	3.03305e-07	0.22104	1.28644e-08	0.505606	7.19094e-41	-0.43212	1.98114e-26	0.284566	3.64256e-15	-0.716687	3.99709e-75
Unigene19818_All	37.46	21.19	52.15	18.96	11.7	10.07	10.6	11.73	17.17	30.6	43.88	46.9	0.138111	1.41175e-11	-1.43965	0	-1.48083	0	1.57776	0	-0.0411811	0.070413	1.61894	0
CL8658.Contig3_All	1.79	4.16	2.56	4.67	6.56	6.83	7.92	7.66	8.93	0.54	0.94	1.7	-1.41174	9.65906e-38	1.0866	5.73679e-52	1.53472	2.58103e-118	-2.49834	1.21074e-165	0.44812	2.77412e-16	-2.94646	1.50209e-266
CL2974.Contig19_All	4.54	2.37	2.81	4.06	6.98	3.04	1.32	2.74	2.05	1	0.97	1.4	-1.52177	2.64608e-61	0.536971	7.34253e-17	-0.657477	1.15152e-16	-2.05874	4.08017e-133	-1.19445	1.26131e-60	-0.864292	4.34739e-17
CL9402.Contig6_All	1.82	1.4	1.68	2.91	1.66	3.06	1.15	1.44	1.19	0.6	1.26	0.78	-0.889803	2.45957e-16	0.641981	1.57623e-14	-0.368326	0.000108183	-1.53178	1.62631e-55	-1.01031	2.54435e-29	-0.521477	3.46061e-06
CL12480.Contig4_All	1.64	1.01	1.1	0.56	1.13	1.33	1.37	0.74	1.09	0.51	0.99	0.77	-0.712844	4.95147e-05	-0.307645	0.0243812	-0.217644	0.0639188	-0.405199	0.00730214	0.0900011	0.160881	-0.4952	0.00352375
CL2324.Contig6_All	2.25	1.85	2.57	2.1	1.32	1.58	0.74	3.46	2.89	1.37	2.38	0.96	-0.500096	1.70833e-09	-0.414565	3.67739e-07	0.100598	0.0593292	-0.0855309	0.0575255	0.515163	2.52219e-10	-0.600694	3.53481e-13
Unigene61293_All	8.35	7	7.61	7.38	8.68	7.85	3.64	7.18	7.76	4	8.23	6.02	-0.321202	5.70646e-07	0.0627281	0.0879106	-0.289626	6.28456e-06	-0.38393	1.45538e-09	-0.352354	4.48037e-08	-0.0315754	0.159556
Unigene64582_All	0.87	1.09	1.16	2.17	1.87	1.09	0.95	1.67	1.76	0.3	0.83	0.86	-0.652453	2.21843e-18	0.714292	2.60268e-33	0.490974	1.47458e-15	-1.36674	1.29257e-94	-0.223318	2.02527e-05	-1.14343	1.68695e-61
CL16271.Contig7_All	2.76	2.54	3.9	3.5	3	0.89	0.84	3.13	3.45	1.01	0.96	1.25	-1.50931	1.31912e-51	-0.311496	5.61421e-05	-0.296872	0.000116201	-1.19781	2.7146e-30	0.0146239	0.213864	-1.21244	1.07113e-30
CL2530.Contig3_All	4.61	5.46	5.02	7.74	7.01	5.51	4.5	5.78	5.83	1.5	3.46	2.73	-0.964311	2.07258e-39	0.427852	9.75484e-14	0.104527	0.0292357	-1.39216	8.65129e-93	-0.323325	7.8916e-09	-1.06884	2.0125e-49
Unigene53677_All	0.94	0.92	1.27	1.49	0.99	1.38	2.44	1.43	1.18	1	2.26	1.76	0.688118	8.13817e-06	0.30374	0.0249165	0.694255	8.94021e-06	0.384378	0.00237923	0.390515	0.00400918	-0.00613645	0.225736
CL2963.Contig5_All	1.58	0.59	1.26	1.4	1.18	2.94	0.71	2.54	1.99	1.34	1.52	2.51	0.650062	1.19412e-13	0.687041	4.8636e-15	0.621427	2.40487e-12	-0.0369786	0.10127	-0.0656136	0.111579	0.028635	0.173895
Unigene38406_All	2.76	2.76	2.64	5.97	5.75	3.78	0.93	2.36	3.7	1	1.85	2.16	-0.69471	7.64042e-11	0.929977	9.03139e-30	-0.212249	0.0120394	-1.62469	1.43715e-69	-1.14223	9.2765e-41	-0.48246	7.91281e-06
CL11182.Contig1_All	0.48	0.49	0.44	0.81	1.26	0.76	0.54	0.56	0.83	0.14	0.4	0.42	-0.547782	0.00390349	1.01759	7.85786e-10	0.472124	0.00402306	-1.56538	6.48746e-18	-0.545471	0.000184134	-1.01991	2.2791e-07
Unigene32385_All	2.88	3.99	2.5	7.56	8.63	6.46	3.75	7.73	4.17	1.74	2.73	2.38	-0.441734	1.26563e-06	1.27755	2.1615e-73	0.756311	1.03427e-22	-1.71928	4.84286e-114	-0.521239	3.02232e-17	-1.19804	5.0201e-47
CL2290.Contig6_All	8.39	5.29	6.51	7	12.23	12.73	1.7	5.78	6.02	2.27	2.09	1.97	-1.66639	8.32101e-89	0.66535	9.60907e-33	-0.565543	2.28443e-16	-2.33174	1.73751e-216	-1.23089	2.63571e-88	-1.10085	6.27928e-33
Unigene18766_All	0.85	0.5	0.48	0.75	0.99	0.87	1.9	1.15	0.74	0.18	0.18	0.11	-1.95436	4.471e-30	0.5236	1.47662e-06	1.06074	3.34435e-25	-2.47796	1.95369e-56	0.537144	5.36897e-09	-3.01511	3.19623e-98
Unigene69138_All	1.34	2.6	2.01	4.41	3.39	1.67	5.68	2.65	4.01	1.23	2.03	3.17	0.14587	0.111975	0.682334	6.23022e-05	1.08223	7.00425e-11	-0.536464	0.000445309	0.399901	0.00270733	-0.936365	4.84859e-09
CL3822.Contig17_All	0.65	0.54	0.46	0.97	1.42	1.65	0.55	0.93	0.98	0.3	0.34	0.42	-0.631412	2.63731e-05	1.30134	2.76658e-30	0.597299	1.78577e-06	-1.93275	6.82968e-53	-0.704039	5.03129e-12	-1.22871	6.95315e-18
CL11988.Contig2_All	2.64	1.67	1.63	4.19	3.67	3.12	1.97	3.52	3.59	0.67	1.53	1.83	-0.547221	7.29886e-06	0.892465	3.00515e-19	0.627958	1.17512e-09	-1.43969	7.30362e-40	-0.264507	0.00123185	-1.17518	1.07278e-24
CL14177.Contig3_All	2.28	2.9	1.07	3.58	6.84	5.33	4.62	4.83	3.39	2.88	3.26	3.01	0.553746	7.17673e-18	1.33411	2.17815e-122	1.04512	1.56435e-68	-0.780367	1.90056e-52	-0.288997	6.47531e-10	-0.49137	7.57842e-20
CL13014.Contig3_All	0.83	0.88	0.67	0.61	1.12	2.01	0.45	1.32	0.58	0.24	0.11	0.36	-1.73651	4.28134e-32	0.657474	1.05182e-11	0.00118093	0.256619	-2.39399	3.50994e-74	-0.656293	1.30355e-11	-1.73769	5.617e-32
CL10035.Contig2_All	1.23	1.78	1.88	3.18	3.34	3.5	2.07	2.33	2.28	1.12	0.71	0.76	-0.905885	2.05996e-12	1.03869	9.58869e-29	0.459442	4.41832e-06	-1.94458	1.84589e-71	-0.57925	1.34832e-11	-1.36533	1.03257e-29
CL5681.Contig3_All	4.44	2.64	5.05	9.31	8.54	9.04	4.33	9.01	8.85	1.98	4.09	3.36	-0.342179	0.00210087	1.1574	1.36112e-32	0.897596	1.08438e-18	-1.49958	2.60428e-48	-0.259801	0.000738314	-1.23977	1.41749e-30
CL7688.Contig1_All	13.04	24.85	8.93	10.01	30.83	20.57	45.71	29.67	34.28	9.05	10.45	12.63	-0.529549	8.33684e-22	0.395387	4.98598e-17	1.24256	2.41685e-202	-0.924937	1.05096e-71	0.847172	1.90754e-108	-1.77211	0
CL3102.Contig10_All	0.42	0.82	0.57	0.57	1.12	1.02	0.76	0.99	0.78	0.4	0.42	0.58	-0.354388	0.0130782	0.583196	4.99682e-05	0.49736	0.000509802	-0.937584	1.39732e-09	-0.0858353	0.142279	-0.851749	8.34331e-08
Unigene26267_All	0.14	0.18	0.28	0.13	0.43	0.32	0.28	0.14	0.13	0.04	0.09	0.1	-1.38229	0.00848455	0.573134	0.0596131	-0.0772687	0.232544	-1.95542	0.000139354	-0.650403	0.0468032	-1.30502	0.0127559
CL1085.Contig24_All	3.93	1.96	2.6	2.03	2.43	3.47	0.45	1.89	1.78	0.72	0.94	0.56	-1.92911	3.79439e-51	-0.0960221	0.0859747	-1.02714	9.4892e-21	-1.83309	3.42412e-45	-0.93112	7.67362e-17	-0.901966	2.18096e-09
Unigene55080_All	0.32	0.15	0.39	0.33	0.52	0.66	0.14	0.39	0.29	0.17	0.16	0.21	-0.671747	0.0204354	0.803586	0.00214004	-0.0591322	0.228497	-1.47533	1.51534e-06	-0.862718	0.00132124	-0.612615	0.0305243
CL15274.Contig2_All	2.92	3.19	2.52	1.8	2.02	1.76	1.33	1.64	1.84	1.28	2.63	2.21	-0.492952	5.59453e-16	-0.62814	1.72647e-23	-0.838237	1.50041e-37	0.135188	0.00878439	-0.210097	0.00152275	0.345285	5.39653e-07
Unigene57875_All	10.55	6.24	8.71	4.69	6.75	4.81	7.77	7.98	6.29	9.2	7.87	11.68	0.186072	0.000723065	-0.645436	3.07656e-20	-0.194081	0.00114954	0.831508	6.1637e-35	0.451355	3.38882e-10	0.380153	7.50818e-10
Unigene4335_All	3.34	3.16	3.19	3.84	3.38	4.89	1.52	3.29	2.94	1.11	2.28	1.52	-0.979664	3.12304e-70	0.321269	2.56033e-13	-0.315232	1.1799e-10	-1.30093	7.46339e-137	-0.636502	5.81241e-42	-0.664431	6.02547e-30
CL8629.Contig3_All	1.68	1.53	1.07	0.64	0.78	0.95	0.34	0.71	1.21	0.25	0.72	0.64	-1.40307	1.55625e-34	-0.85144	2.63065e-16	-0.915703	3.87387e-18	-0.551625	7.80727e-06	-0.0642624	0.156436	-0.487363	0.000113183
CL5073.Contig23_All	2.27	6.66	5.25	11.61	8.81	6.12	14.29	9.76	9.47	3.79	14.4	15.42	1.25595	1.35313e-105	0.909479	9.14518e-50	1.25062	1.54157e-103	0.346469	5.57233e-13	0.341144	3.44601e-12	0.00532463	0.213931
CL13272.Contig4_All	5.43	5.53	5.3	3.02	3.05	3.3	2.34	3.73	3.1	2.6	6	6.14	-0.135326	0.00237792	-0.79377	3.18933e-44	-0.815956	3.86268e-46	0.658444	3.4039e-30	-0.0221865	0.186092	0.68063	1.90288e-31
Unigene49289_All	5.42	4.03	5.73	5.79	6.79	6.15	5.14	5.24	5.54	2.33	5.2	6.12	-0.141376	0.0167618	0.306488	5.02463e-06	0.0804672	0.081315	-0.447864	8.96693e-11	-0.226021	0.000415764	-0.221843	0.000975915
CL4908.Contig1_All	2.86	2.32	2.33	1.9	2.16	2.73	0.63	1.5	1.46	0.9	1.51	1.73	-0.852366	6.52618e-17	-0.146808	0.0328911	-1.05291	5.6768e-23	-0.705558	6.48824e-12	-0.906107	1.09869e-16	0.200549	0.0299538
CL10204.Contig4_All	1.88	1.84	0.8	0.47	0.8	0.68	0.9	0.49	0.82	0.61	2.41	1.95	0.148437	0.060406	-1.20598	1.55359e-14	-1.02486	1.49113e-11	1.35441	3.96327e-19	0.181116	0.0939704	1.1733	2.243e-15
CL13278.Contig1_All	2.53	4.98	3.23	1.91	3.75	5.14	2.34	2.26	0.72	0.55	0.99	0.61	-2.30937	6.42778e-77	0.00946535	0.223458	-0.999967	8.76465e-24	-2.31884	4.66755e-78	-1.00943	3.15795e-24	-1.30941	7.05498e-19
CL1800.Contig2_All	2.86	1.69	1.88	2.06	2.47	2.5	1.67	2.51	2.09	2.74	5.32	4.65	0.994725	8.05292e-23	0.133912	0.0734725	-0.0220694	0.227249	0.860813	1.42637e-18	-0.155982	0.055686	1.01679	1.84647e-23
Unigene17834_All	0.81	0.36	0.36	0.71	0.8	0.84	0.38	0.37	0.68	0.14	0.12	0.13	-1.9477	2.65411e-11	0.6307	0.000368893	-0.0795243	0.193904	-2.5784	1.17482e-22	-0.710224	0.000103485	-1.86818	3.00961e-10
Unigene46523_All	10.26	9.71	5.85	10.27	9.74	9.38	7.96	10.61	10.88	6.35	13.46	11.21	0.275657	7.29314e-07	0.190805	0.000454605	0.204336	0.000212576	0.084852	0.0224057	0.0135312	0.202445	0.0713209	0.0549352
CL12132.Contig1_All	0.33	0.59	0.43	0.51	0.95	0.47	0.64	0.62	0.59	0.61	0.33	0.36	-0.0552302	0.190703	0.514387	0.0109263	0.463745	0.0193669	-0.569617	0.00364004	-0.0506417	0.20434	-0.518975	0.010561
Unigene42206_All	4.34	3.68	2.52	14.71	7.23	7.29	5.61	8.22	7.54	1.12	2.52	2.84	-0.692072	7.18617e-13	1.47655	7.15563e-107	1.0328	9.45217e-46	-2.16863	1.77867e-181	-0.443753	2.43239e-15	-1.72487	1.00417e-98
CL8541.Contig3_All	13.81	18.35	11.16	7.62	7.74	7.85	5.16	6.81	7.44	5.14	10.63	13.75	-0.540391	8.53908e-26	-0.89607	1.73917e-59	-1.14364	9.23291e-88	0.355679	1.0173e-09	-0.24757	0.000100638	0.603249	8.15128e-22
CL11135.Contig1_All	3.53	3.21	2.83	5.13	5	4.25	3.35	3.9	5.36	1.67	3.08	2.38	-0.42295	8.85567e-14	0.588442	3.19475e-34	0.402656	5.17962e-16	-1.01139	2.79249e-85	-0.185786	1.74183e-05	-0.825606	1.41013e-53
CL13586.Contig1_All	24.19	23.71	30.14	14.68	15.8	15.83	9.31	13.61	15.33	22.37	41.39	44.36	0.479187	1.56954e-70	-0.749892	5.65163e-111	-1.01743	1.89547e-184	1.22908	0	-0.267539	1.50172e-11	1.49662	0
CL4310.Contig22_All	13	3.8	13.34	4.2	7.59	3.52	3.85	5.26	4.61	6.58	10.56	10.16	-0.136844	0.0001969	-0.975658	6.19052e-100	-1.12678	1.25193e-125	0.838814	9.78052e-72	-0.151123	0.00256751	0.989936	2.00581e-93
CL556.Contig5_All	3.95	3.73	2.71	3.67	5.6	3.38	1.74	2.76	3.8	2.27	3.39	3.88	-0.116257	0.0234084	0.285358	2.86578e-06	-0.316643	3.12918e-06	-0.401615	1.11645e-10	-0.602001	1.60226e-19	0.200386	0.00170682
CL10491.Contig3_All	20.62	23.1	11.49	7.66	19.27	16.24	2.52	8.09	8.49	5.9	10.19	8.72	-1.14759	4.93785e-208	-0.353917	1.69598e-27	-1.51856	0	-0.793675	2.38999e-89	-1.16464	3.57178e-165	0.370964	1.4598e-14
CL12492.Contig18_All	1.1	1.52	2.53	6.02	6.29	3.89	0.8	1.83	2.87	0.8	0.82	0.79	-1.09165	1.09935e-20	1.65478	8.28048e-113	0.102397	0.0867094	-2.74643	8.41694e-213	-1.55238	1.74173e-102	-1.19405	4.86536e-25
Unigene28504_All	0.05	0.19	0.12	0.56	0.28	0.23	0.23	0.47	0.5	0.14	0.1	0.11	-0.0537173	0.191115	1.58397	6.95874e-16	1.76286	2.84183e-20	-1.63768	5.43693e-17	0.178897	0.0636423	-1.81658	3.37511e-21
CL11193.Contig3_All	12.26	11.14	12.91	10.48	9.76	11.27	8.66	10.25	10.64	7.83	13.65	11.38	-0.138287	0.00012007	-0.202206	1.16867e-07	-0.288556	2.52968e-13	0.0639191	0.0192088	-0.0863504	0.0119425	0.150269	8.29259e-05
CL11081.Contig2_All	2.58	4.23	1.95	4.48	6.68	5.48	3.04	3.88	3.58	1.15	2.22	2.58	-0.549877	6.70218e-09	0.927198	7.892e-35	0.273417	0.000506831	-1.47707	8.78258e-72	-0.65378	8.81568e-20	-0.823294	4.59813e-19
CL3409.Contig3_All	51.67	51.44	58.41	48.48	35.33	37.32	28.94	60.21	50.81	47.78	82.46	53.49	0.191244	1.26458e-26	-0.411714	3.80157e-94	-0.194407	5.80264e-24	0.602958	5.2789e-215	0.217306	9.41898e-26	0.385652	2.39608e-95
CL7312.Contig10_All	0.93	0.56	0.76	0.82	0.84	0.85	0.37	0.71	0.55	0.3	0.42	0.46	-0.932214	5.54475e-17	0.154188	0.0301512	-0.46966	3.09704e-06	-1.0864	9.2933e-24	-0.623849	4.35082e-10	-0.462554	5.79794e-05
CL15855.Contig18_All	3.23	5.32	5.07	5.4	4.43	4.92	6.17	5.7	6.56	3.24	3.92	4.21	-0.256463	2.61483e-11	0.115759	0.000633425	0.438811	1.67697e-36	-0.372222	8.76105e-23	0.323052	2.33062e-21	-0.695274	6.96907e-82
CL9238.Contig4_All	17.74	20.74	9.21	15.54	9.46	11.32	6.59	14.55	8.05	12.68	19.74	6.27	-0.297909	1.18832e-15	-0.388971	2.20995e-24	-0.693978	3.75947e-66	0.0910625	0.0044155	-0.305006	1.12274e-12	0.396069	6.97153e-21
CL16145.Contig33_All	5.88	4.4	7.3	6.33	1.43	5	1.5	3.26	2.57	1.93	3.51	2.57	-1.13062	1.4181e-114	-0.459034	3.76768e-25	-1.25099	5.65148e-133	-0.671583	4.20683e-36	-0.791961	1.53173e-46	0.120378	0.0153946
CL10135.Contig2_All	3.05	2.68	2.51	3.45	3.11	4.81	8.94	4.92	3.65	2.03	3.5	2.66	-0.00270458	0.218367	0.466658	1.03669e-11	1.09168	1.22306e-68	-0.469363	3.46215e-12	0.625022	1.58156e-27	-1.09438	2.83391e-69
CL14956.Contig6_All	0.35	0.34	0.5	0.5	0.36	0.59	0.23	0.68	0.66	0.32	0.48	0.32	-0.0755197	0.160714	0.279702	0.0350034	0.410688	0.00660188	-0.355222	0.00864577	0.130986	0.116299	-0.486208	0.00190203
CL10349.Contig1_All	0.69	0.87	1.07	0.44	0.96	0.54	1.79	0.97	1.3	0.78	1.59	1.61	0.603072	5.33617e-06	-0.445417	0.00272543	0.631672	2.51874e-06	1.04849	7.40506e-13	1.07709	4.12998e-13	-0.0286	0.194763
Unigene16854_All	6.67	5.23	5.38	6.28	6.86	5.68	3.69	4.72	3.95	2.98	5.57	6.47	-0.194538	0.000120822	0.126465	0.00489435	-0.472845	9.75261e-17	-0.321003	4.07535e-10	-0.59931	8.69613e-27	0.278308	1.04953e-06
CL2020.Contig2_All	0.86	1.13	0.89	0.75	0.53	0.61	0.68	0.73	0.6	0.53	0.61	0.74	-0.618397	8.14496e-05	-0.605903	0.00012553	-0.511435	0.000800467	-0.0124947	0.145215	0.0944673	0.157813	-0.106962	0.139553
Unigene38913_All	5.4	16.39	9.74	14.67	11.84	7.15	16.84	12.34	11.28	11.03	31.09	26.25	1.12529	1.60774e-180	0.0983524	0.0121108	0.369122	1.71988e-16	1.02694	4.80006e-156	0.270769	5.66474e-10	0.756167	4.00775e-93
Unigene25454_All	0.23	0.28	0.4	0.46	0.25	0.67	1.01	0.67	0.68	0.23	0.72	0.81	0.971374	0.00128407	0.604533	0.0287224	1.38644	5.18677e-06	0.366841	0.0384877	0.78191	0.00217233	-0.41507	0.0335006
CL11397.Contig2_All	0.97	0.96	0.57	1.36	2.83	1.82	1.64	1.31	1.32	0.42	0.8	1.35	0.0483248	0.163226	1.26616	2.25784e-35	0.78022	1.46791e-12	-1.21784	6.23722e-34	-0.485943	2.90012e-08	-0.731895	1.55784e-11
CL4435.Contig15_All	0.26	0.18	0.16	0.21	0.27	0.28	0.27	0.67	0.4	0.34	0.62	0.57	1.36934	2.39857e-08	0.354407	0.0687957	1.18928	2.55019e-06	1.01493	4.3113e-06	0.834876	0.000276476	0.180054	0.0987019
CL5910.Contig9_All	24.99	12.61	17.97	19.29	19.62	10.6	11.47	15.42	16.53	18.28	28.38	17.35	0.210223	4.4152e-11	-0.162644	1.30932e-06	-0.345289	4.7465e-22	0.372867	1.9082e-29	-0.182645	3.78066e-07	0.555512	2.11821e-58
CL15491.Contig1_All	1.33	1.25	1.31	2.66	1.52	2.06	0.73	1.33	1.57	0.64	1.32	1.13	-0.325212	0.000613762	0.687966	3.02463e-15	-0.0913956	0.107208	-1.01318	2.66481e-28	-0.779361	2.08406e-18	-0.233817	0.00855789
CL16158.Contig17_All	0.86	0.84	1.1	0.65	1.34	0.69	0.14	0.47	0.52	0.44	0.63	0.33	-0.998608	1.08214e-12	-0.0632972	0.156224	-1.29589	4.70798e-18	-0.935311	2.13067e-11	-1.23259	3.66849e-16	0.297277	0.0273545
Unigene58128_All	0.56	0.42	0.46	0.77	0.7	0.99	0.14	0.62	0.46	0.52	0.31	0.51	-0.0858485	0.181674	0.773989	0.00207853	-0.216142	0.14686	-0.859837	0.000495278	-0.990131	0.000273809	0.130294	0.169419
CL2478.Contig8_All	0.44	0.97	1.41	1.52	1.54	0.76	1.2	1.26	1.59	0.56	0.92	0.73	-0.341118	0.00162567	0.443974	1.36111e-05	0.526559	2.84e-07	-0.785092	9.33885e-13	0.0825844	0.108571	-0.867677	3.74422e-15
CL1101.Contig6_All	16.93	8.71	16.26	9.49	12	10.58	8.28	11.55	10.94	7.24	14.17	9.84	-0.416125	3.50848e-23	-0.382865	6.09159e-20	-0.433752	1.40183e-24	-0.0332598	0.0748409	-0.0508873	0.074759	0.0176274	0.169386
CL9797.Contig2_All	148.86	98.23	186.57	116.12	80.5	80.31	119.65	140.21	132.61	103.18	212.23	193.04	0.24152	5.50551e-64	-0.641584	0	-0.129074	2.70492e-17	0.883104	0	0.51251	1.19569e-196	0.370594	4.29445e-141
Unigene64921_All	0.14	0.24	0.16	0.43	0.26	0.26	0.18	0.39	0.23	0.07	0.21	0.15	-0.327403	0.0813312	0.805818	0.00121137	0.580213	0.014405	-1.13322	1.96603e-05	-0.225606	0.100062	-0.907615	0.000890883
CL11256.Contig2_All	0.48	0.56	0.89	0.41	0.15	0.31	0.78	0.35	0.41	0.56	0.74	0.56	-0.0493856	0.182025	-1.14678	2.36685e-07	-0.315418	0.0358277	1.09739	4.11213e-07	0.83136	0.000232586	0.266032	0.0496953
CL4600.Contig6_All	13.67	16.77	18.82	21.86	17.11	12.8	22.34	21.85	20.05	13.47	21.42	29.13	0.383472	6.74102e-54	0.0742298	0.00175234	0.388539	8.30274e-55	0.309242	6.93265e-37	0.314309	2.50923e-37	-0.00506674	0.196711
CL14996.Contig3_All	0.55	0.25	0.21	0.69	0.65	0.81	0.32	0.5	0.64	0.25	0.4	0.47	0.163139	0.111424	1.09757	2.206e-09	0.542345	0.00318905	-0.934433	6.11644e-08	-0.555227	0.000444447	-0.379206	0.0169655
Unigene42379_All	2.22	3.21	2.36	1.29	1.37	1.9	1.03	1.06	1.48	0.77	2.58	1.71	-0.614817	4.46755e-09	-0.769395	1.97467e-12	-1.11194	2.09444e-21	0.154578	0.0352689	-0.34255	0.00383457	0.497128	5.27937e-05
Unigene1580_All	0.65	0.43	1.01	0.69	0.62	0.7	0.77	0.5	0.51	0.38	0.64	0.4	-0.549752	0.00667184	-0.0483682	0.205584	-0.221364	0.0987525	-0.501383	0.0071937	-0.172995	0.122194	-0.328388	0.0521961
CL1281.Contig2_All	3.72	2.57	2.99	3.07	2.95	2.27	2.15	2.25	1.93	1.28	1.72	1.89	-0.916929	8.48367e-38	-0.16059	0.00378395	-0.546076	3.53401e-16	-0.75634	2.77471e-25	-0.385486	1.43073e-08	-0.370853	1.07835e-06
CL7549.Contig3_All	0.81	0.69	0.45	0.22	0.36	0.6	0.38	0.19	0.13	0.16	0.11	0.17	-2.15017	5.67721e-09	-0.716477	0.00531922	-1.46937	6.29603e-06	-1.43369	0.000172096	-0.752894	0.0157623	-0.680801	0.0452142
Unigene47956_All	0.23	0.23	0.46	0.3	0.15	0.38	0.15	0.22	0.46	0.08	0.15	0.15	-1.27673	0.0228033	-0.123273	0.208032	-0.113404	0.226062	-1.15346	0.0217888	0.00986865	0.239876	-1.16333	0.0344551
CL10051.Contig5_All	0.62	0.65	0.36	0.62	0.69	0.86	0.7	0.47	1.38	1.44	1.24	0.84	1.11822	2.71178e-10	0.421642	0.0127268	0.651119	0.000385469	0.696574	7.60663e-06	0.229477	0.0607793	0.467097	0.00131208
CL17118.Contig17_All	2.54	1.55	2.41	1.25	2.51	3.01	0.71	2.06	1.24	1.13	2.76	1.57	-0.246997	0.000904153	0.0613862	0.117209	-0.683796	1.27382e-14	-0.308383	3.50374e-05	-0.745182	2.55533e-17	0.436799	1.14198e-06
Unigene19846_All	0.36	0.38	0.33	0.36	0.4	0.45	0.61	0.69	0.6	0.34	0.39	0.77	0.507232	0.0137198	0.180329	0.135274	0.844701	0.000223257	0.326903	0.0324023	0.664372	0.0018324	-0.337469	0.036473
CL4725.Contig10_All	1.54	1.23	2.17	2.18	1.59	1.36	1.13	1.28	2.34	1.49	1.75	1.26	-0.129211	0.0649373	0.0599932	0.152306	-0.0450673	0.187936	-0.189204	0.0160525	-0.105061	0.095103	-0.0841438	0.117507
CL13628.Contig2_All	3.89	3.66	3.41	4.03	4.49	5.43	2.18	4.07	3.25	1.52	2.53	2.72	-0.688582	6.90379e-30	0.349698	4.02e-12	-0.198654	0.000172916	-1.03828	6.26963e-74	-0.548353	2.71094e-25	-0.489928	4.73184e-15
CL15664.Contig26_All	3.41	3.16	3.57	3.51	3.69	3.2	2.32	3.92	6.09	2.3	1.96	1.4	-0.837561	3.48383e-22	0.038276	0.158067	0.289398	2.5697e-05	-0.875837	1.23272e-24	0.251122	0.000181317	-1.12696	3.10082e-42
CL16021.Contig15_All	3.28	1.96	0.96	2.35	1.74	4.3	0.58	2.12	1.95	1.44	2.69	1.31	-0.184666	0.00599414	0.440166	4.01126e-10	-0.400209	6.70795e-07	-0.624832	6.28166e-18	-0.840375	5.70091e-28	0.215543	0.00372772
Unigene23804_All	0.71	1.41	0.63	1.45	0.53	1.04	1.66	1.55	1.52	0.4	0.88	0.96	-0.285359	0.0239965	0.138246	0.102747	0.791615	6.9539e-09	-0.423605	0.00183485	0.653369	7.49696e-07	-1.07697	8.46227e-14
Unigene65693_All	19.42	17.08	22.21	27.94	15.78	20.19	31.94	29.39	27.14	14.52	17.55	26.49	0.0132567	0.178498	0.128652	0.00178485	0.609462	1.31741e-47	-0.115395	0.00215722	0.48081	1.46577e-31	-0.596205	4.27521e-46
CL16194.Contig13_All	8.39	7.94	11.11	10.51	8.29	7.02	12.65	12.63	12.02	6.24	15.7	13.86	0.390007	4.55281e-22	-0.0842799	0.0179925	0.45058	4.90304e-29	0.474287	4.06737e-31	0.53486	5.7483e-39	-0.0605736	0.0306135
Unigene4663_All	7.94	3.26	5.62	4.57	2	4.98	0.92	2.53	2.78	1.7	2.14	3.17	-1.25709	4.16359e-103	-0.538691	1.514e-25	-1.42234	4.2279e-123	-0.718402	1.27692e-29	-0.883644	1.43519e-40	0.165241	0.00840998
CL3671.Contig5_All	0.89	1.18	0.46	0.82	1.65	2.06	0.29	0.82	1	0.13	0.49	0.33	-1.4188	9.68017e-17	0.838109	4.40597e-13	-0.249567	0.0257264	-2.25691	2.71832e-52	-1.08768	4.22276e-19	-1.16923	4.49714e-11
CL7544.Contig9_All	2.25	1.4	2.16	1.88	2.76	3.92	0.49	1.64	1.41	0.63	0.74	0.64	-1.52696	5.90344e-68	0.557317	7.24775e-20	-0.704902	2.17461e-20	-2.08428	1.84257e-151	-1.26222	8.35737e-74	-0.82206	7.90403e-17
Unigene45589_All	0.22	0.11	0.31	0.46	0.29	0.43	0.42	0.4	0.18	0.19	0.24	0.28	0.132558	0.145008	0.87544	6.33905e-05	0.637805	0.0030879	-0.742882	0.000204922	-0.237635	0.0719139	-0.505247	0.00966037
CL5305.Contig2_All	1.36	1.18	0.85	1.06	1.33	1.26	1.01	1.37	0.98	0.51	0.79	0.59	-0.82494	0.000272733	0.113144	0.153378	0.011656	0.250607	-0.938084	2.2366e-05	-0.101488	0.162602	-0.836596	0.000243702
CL11292.Contig2_All	1.45	2.45	1.22	2.42	2.09	2.11	2.19	2.73	2.63	0.9	1.45	2.18	-0.170837	0.014393	0.37235	1.49567e-06	0.566805	1.5527e-13	-0.543187	1.03581e-11	0.194456	0.00270132	-0.737643	1.16272e-20
Unigene61646_All	0.48	0.33	0.39	0.75	0.51	0.69	0.45	0.35	0.69	0.15	0.33	0.2	-0.812065	0.00846984	0.702698	0.00496826	0.334055	0.0834442	-1.51476	1.01349e-06	-0.368643	0.0513009	-1.14612	0.00040247
CL2745.Contig5_All	1.31	2.64	2.44	2.56	0.76	2.99	3.05	3.4	1.84	1.5	2.42	0.89	-0.410714	1.54809e-08	-0.0154476	0.205063	0.38189	2.65214e-09	-0.395267	3.09193e-08	0.397337	7.15612e-10	-0.792604	5.65264e-30
CL1988.Contig53_All	1.16	1.73	2.49	3.35	3.37	3.45	8.16	10.3	9.88	2.11	2.26	0.83	-0.0427929	0.165526	0.92317	3.94444e-21	2.409	5.41619e-221	-0.965962	4.10403e-23	1.48583	2.46009e-116	-2.45179	1.26834e-226
CL16020.Contig28_All	0.21	0.34	0.22	0.5	0.63	0.48	0.25	0.28	0.38	0.12	0.4	0.44	0.307701	0.0286328	1.04652	2.44533e-10	0.243246	0.0643762	-0.73882	7.69478e-07	-0.803275	3.11902e-07	0.0644551	0.174713
Unigene26754_All	1.38	1.75	1.4	1.23	1.74	1.07	1.84	1.09	1.28	0.79	0.72	0.35	-1.27819	2.66431e-18	-0.161811	0.054085	-0.102324	0.116197	-1.11638	5.62716e-14	0.0594876	0.163661	-1.17587	3.2888e-15
CL9972.Contig8_All	5.75	5.97	6.66	7.05	7.42	5.79	3.92	6.49	6.48	3.29	5.04	5.06	-0.453452	3.8956e-33	0.141065	1.72415e-05	-0.115623	0.000530923	-0.594517	1.62094e-58	-0.256688	1.62171e-13	-0.337829	1.8147e-18
Unigene22607_All	0.61	0.83	0.56	1.17	1.09	0.86	1.24	1.46	0.67	0.44	1.35	1.04	0.503273	2.68438e-05	0.642085	1.14459e-07	0.760605	2.44463e-10	-0.138812	0.0375207	0.11852	0.0785379	-0.257332	0.00653825
CL468.Contig9_All	5.05	6.25	4.27	6.6	7.78	7.06	6.26	7.45	5.8	2.56	4.36	4.77	-0.404748	3.43574e-10	0.464217	1.75431e-16	0.336199	3.88779e-09	-0.868966	5.28636e-47	-0.128018	0.00588768	-0.740947	6.4103e-33
CL151.Contig35_All	5.14	3.43	5.62	2.07	3.36	2.7	0.74	2	1.28	2.82	8.51	6.81	0.359304	4.60237e-13	-0.802441	9.23008e-39	-1.80857	8.37935e-134	1.16175	2.38352e-90	-1.00613	1.09947e-32	2.16788	9.23213e-218
CL5269.Contig41_All	0.74	1.19	0.77	1.09	1.05	0.69	0.54	1.06	0.7	0.89	0.71	0.79	-0.174587	0.0134014	0.0758639	0.101592	-0.217024	0.00544983	-0.250451	0.000799832	-0.292888	0.000350447	0.0424367	0.157477
CL1293.Contig19_All	0.24	0.07	0.21	0.56	0.43	0.6	0.52	0.66	0.41	0.04	0.04	0.07	-1.85639	0.00192529	1.64052	4.24952e-06	1.65332	3.76517e-06	-3.49691	1.84297e-12	0.0128023	0.235166	-3.50971	2.87157e-12
CL13751.Contig1_All	0.61	0.23	0.55	1.35	0.91	1.16	0.73	1.07	1	0.27	0.51	0.55	-0.0527642	0.163376	1.30384	5.72549e-33	1.01781	5.76004e-19	-1.3566	1.764e-35	-0.28603	0.000709467	-1.07057	1.3772e-20
CL7895.Contig3_All	8.12	9.28	7.89	8.54	4.82	8.27	7.07	9.36	10.42	9.11	15.99	12.64	0.581839	1.02562e-61	-0.222013	2.19264e-08	0.0939304	0.00533101	0.803851	7.12716e-108	0.315943	1.7688e-15	0.487908	3.86886e-45
Unigene71501_All	0.42	0.14	0.21	0.56	0.21	0.35	0.55	0.41	0.14	0.35	0.34	0.13	0.111832	0.194369	0.542826	0.0927736	0.552695	0.0967369	-0.430994	0.0706376	0.00986865	0.239551	-0.440863	0.108567
Unigene25968_All	2.88	3.61	3.16	2.82	3.58	2.42	2.07	2.32	2.03	1.93	2.85	3.36	-0.235311	0.00151583	-0.125394	0.0380283	-0.576052	4.97016e-11	-0.109917	0.0335096	-0.450658	3.39026e-07	0.340741	8.34494e-05
Unigene10537_All	0.34	0.49	0.15	1.11	0.41	0.95	0.73	0.92	0.74	0.56	0.28	0.18	0.0800904	0.165168	1.34759	4.92293e-15	1.3057	5.39897e-14	-1.2675	3.12146e-14	-0.0418999	0.191842	-1.2256	5.84139e-13
CL11821.Contig5_All	0.98	0.94	1.07	1	1.33	1.83	0.69	1.37	1.41	0.4	0.57	0.74	-0.801205	5.63759e-09	0.474484	1.22272e-05	0.223904	0.0197722	-1.27569	2.54138e-23	-0.25058	0.00738598	-1.02511	2.37545e-14
CL6910.Contig47_All	4.05	4.21	3.55	4.51	5.26	5.01	2.2	3.61	3.52	1.5	3.38	3.71	-0.455	3.68181e-15	0.325528	1.13928e-10	-0.332467	3.9976e-09	-0.780528	8.86355e-46	-0.657995	8.62039e-34	-0.122533	0.014353
CL15905.Contig5_All	16.69	11.15	17.75	3.9	2.35	3.21	0.9	2.54	2.16	7.49	14.74	10.26	-0.485328	8.49516e-66	-2.26745	0	-3.01283	0	1.78212	0	-0.745383	4.03773e-30	2.5275	0
Unigene1136_All	0.38	0.57	0.4	0.55	0.54	0.24	0.32	0.88	1.13	0.37	0.79	0.55	0.355375	0.0260621	-0.0161685	0.230747	0.804061	2.27799e-05	0.371543	0.014628	0.82023	1.67252e-05	-0.448687	0.00503711
CL14983.Contig13_All	0.5	0.33	0.24	0.42	0.26	0.24	0.2	0.56	0.39	0.21	0.17	0.07	-1.23381	1.1299e-08	-0.226119	0.0650256	0.0989257	0.160828	-1.00769	2.87807e-06	0.325044	0.0241627	-1.33273	5.0381e-10
CL3794.Contig4_All	8.64	8.94	5.41	13.88	9.86	11.72	5.36	9.39	6.93	3.6	4.87	5.35	-0.726674	1.5223e-39	0.628762	1.28023e-46	-0.0725696	0.0459141	-1.35544	6.17349e-165	-0.701331	7.19652e-56	-0.654105	1.74184e-31
Unigene46442_All	1.44	2.03	1.79	4.2	3.78	1.79	3.35	3.88	4.15	1.99	3.13	3.11	0.656388	1.00604e-09	0.899586	1.00048e-17	1.12541	1.28151e-28	-0.243198	0.0018795	0.225823	0.00339193	-0.469021	9.78021e-08
CL9053.Contig13_All	0.14	0.32	0.11	0.19	0.13	0.21	0.37	0.23	0.19	0.37	0.28	0.69	1.21769	1.60484e-06	-0.125613	0.179636	0.457526	0.0419161	1.34331	1.60179e-07	0.58314	0.0189462	0.760169	0.000659716
Unigene65633_All	10.93	15.46	14.62	19.5	23.87	13.38	15.98	14.47	16.72	6.34	19.64	14.16	-0.0182373	0.16833	0.47419	2.70258e-23	0.217017	6.99874e-06	-0.492427	2.59814e-25	-0.257173	1.36443e-08	-0.235254	1.15759e-06
CL5196.Contig27_All	3.4	3.21	7.04	1.74	1.96	2.18	0.55	1.05	1.75	1.85	1.33	2.76	-1.19109	2.84638e-54	-1.21382	1.84252e-55	-2.02023	7.67193e-114	0.0227309	0.12589	-0.806413	1.55745e-13	0.829144	1.92924e-14
CL1376.Contig4_All	37.9	35.51	45.22	23.13	21.16	22.99	11.91	28.2	32.83	27.2	39.7	26.12	-0.347644	2.86304e-75	-0.816397	0	-0.692522	4.53402e-258	0.468753	1.09587e-102	0.123875	5.5429e-08	0.344878	1.99574e-58
CL15404.Contig3_All	1.42	1.2	0.83	1.2	2.03	2.46	0.6	0.99	1.2	0.46	0.72	0.28	-1.23067	1.17816e-14	0.725317	1.68012e-10	-0.298828	0.0105756	-1.95599	1.57407e-43	-1.02414	2.53467e-17	-0.931844	2.00013e-08
CL6713.Contig5_All	3.15	1.68	2.65	1.65	2.48	2.33	0.98	1.9	1.21	0.74	1.05	0.93	-1.45519	2.16725e-76	-0.211545	0.000353796	-0.863228	9.97699e-34	-1.24365	9.48933e-53	-0.651683	1.06467e-18	-0.591967	5.46449e-11
Unigene65259_All	1.14	0.84	1.32	0.72	0.84	0.96	0.25	0.68	0.98	0.72	0.53	0.41	-0.991841	2.92277e-21	-0.388046	2.00318e-05	-0.781842	1.22725e-14	-0.603794	2.18615e-08	-0.393796	0.000131272	-0.209999	0.0239185
CL804.Contig19_All	1.01	0.4	0.72	0.79	1.4	1.32	0.49	0.6	0.92	0.19	0.47	0.65	-0.704622	1.50145e-05	0.718209	4.57742e-08	-0.0846157	0.163008	-1.42283	1.79082e-21	-0.802825	2.3448e-09	-0.620006	0.000140755
CL5659.Contig9_All	4.28	3.79	2.61	6.18	5.13	4.93	2.27	3.68	3.23	0.81	2.47	1.52	-1.1464	3.57806e-39	0.60688	6.60505e-21	-0.206663	0.00223143	-1.75328	1.0866e-109	-0.813543	1.545e-33	-0.939732	4.2853e-25
CL15719.Contig2_All	1.23	0.62	0.56	0.3	0.85	1.28	0.29	0.29	0.58	0.27	0.4	0.21	-1.43613	1.61621e-15	0.00753738	0.233816	-1.04277	5.81985e-10	-1.44367	6.01969e-16	-1.05031	4.30474e-10	-0.393361	0.0209733
Unigene66067_All	1.28	0.37	0.87	0.59	0.18	0.5	0.41	0.58	0.73	0.63	0.45	0.4	-0.750664	0.00504951	-0.971747	0.00111618	-0.521306	0.0282068	0.221083	0.0885785	0.450441	0.0607181	-0.229359	0.127574
CL8060.Contig2_All	0.99	1.48	0.77	3.22	2.4	2.01	1.4	2.21	2.65	0.29	0.97	1.05	-0.469991	0.00869469	1.24221	8.34513e-15	0.970236	5.48705e-09	-1.7122	3.16839e-23	-0.271973	0.0150648	-1.44023	2.21198e-15
CL7950.Contig8_All	0.42	0.69	0.84	1.34	1.36	1.22	2.02	1.44	1.05	0.65	1.06	1.7	0.810506	3.99757e-13	1.01032	2.15018e-20	1.21377	1.83105e-30	-0.199815	0.00653757	0.203453	0.0075892	-0.403267	4.70631e-06
CL10613.Contig3_All	0.8	0.99	0.55	0.97	1.33	1.17	0.34	1.17	1.02	0.3	0.39	0.25	-1.31819	8.61804e-20	0.56568	4.1177e-08	0.124139	0.0836911	-1.88387	1.45775e-46	-0.441542	9.01054e-06	-1.44233	4.06372e-24
CL12506.Contig6_All	0.76	1	0.84	0.87	0.69	0.71	0.33	0.79	0.59	0.46	0.62	0.85	-0.421437	0.0064524	-0.194219	0.0773687	-0.591792	0.000746863	-0.227218	0.0392418	-0.397573	0.0140521	0.170355	0.103931
CL3075.Contig5_All	2.16	2.3	1.95	3.99	5.02	3.75	1.96	1.6	2.69	1.27	2.23	1.28	-0.419699	2.97397e-05	0.995748	7.08364e-33	-0.0315574	0.202989	-1.41545	9.96493e-57	-1.02731	2.47926e-34	-0.388141	0.000110992
CL11587.Contig10_All	0.32	0.19	0.13	0.41	0.82	0.56	0.11	0.26	0.38	0.06	0.13	0.17	-0.816033	0.00235128	1.47511	4.48775e-13	0.231191	0.107668	-2.29115	1.01522e-22	-1.24392	1.94948e-10	-1.04722	0.000136016
CL5149.Contig2_All	0.86	0.8	0.98	1.13	1.34	1.47	0.89	1.4	1.38	0.44	1.13	1.18	0.0617729	0.133259	0.576325	1.27691e-09	0.478525	5.71138e-07	-0.514552	1.68448e-08	-0.0978002	0.0772206	-0.416752	7.18686e-06
Unigene14974_All	6.87	7.52	7.74	9.34	7.62	5.58	5.35	8.4	8.01	4.39	7.27	7.34	-0.217439	5.47404e-14	0.0282274	0.087951	-0.0181197	0.148659	-0.245667	9.87327e-18	-0.046347	0.0310414	-0.19932	6.40892e-12
CL1451.Contig3_All	0.59	0.64	0.58	1.32	0.71	0.84	0.63	1.83	1.31	0.52	0.75	0.4	-0.117694	0.114638	0.668167	1.32703e-06	1.07049	6.42607e-16	-0.78586	1.60423e-08	0.402321	0.000286977	-1.18818	1.2532e-18
CL7874.Contig3_All	0.54	0.58	0.8	1.42	0.75	0.47	1.22	1.19	1.09	0.42	0.53	1.19	0.182045	0.124036	0.465263	0.0249627	0.891721	0.000134563	-0.283218	0.0453667	0.426457	0.0196137	-0.709676	0.00103279
CL6950.Contig3_All	1.2	0.85	1.09	1.2	1.46	2.41	0.76	0.58	1.24	0.35	0.66	0.19	-1.3804	1.0683e-34	0.691259	1.3261e-18	-0.280694	0.00107483	-2.07166	5.83029e-96	-0.971953	1.01464e-31	-1.09971	1.098e-20
CL13842.Contig2_All	8.28	11.15	5.05	14.75	19.08	17.37	10.32	13.54	16.3	3.46	6.53	5.4	-0.662716	5.52947e-35	1.06593	1.12693e-156	0.723237	6.72572e-65	-1.72864	0	-0.34269	2.74272e-22	-1.38595	5.92833e-187
Unigene41685_All	0.4	0.98	0.41	1.21	1.57	1.91	0.7	0.96	0.72	0.13	0.15	0.34	-1.52152	8.72628e-08	1.38579	3.68672e-15	0.424538	0.0148506	-2.90731	5.7718e-37	-0.961256	3.29795e-09	-1.94605	5.19199e-13
Unigene394_All	1.96	1.83	1.44	2.34	2.2	2.12	0.55	1.74	1.38	0.94	1.13	1.24	-0.66131	1.26404e-21	0.348519	1.48172e-09	-0.502608	9.57461e-14	-1.00983	5.35708e-54	-0.851127	2.80307e-40	-0.158702	0.0112528
Unigene32634_All	0.68	1.1	0.44	1.48	1.8	1.39	2.31	1.52	1.11	0.62	0.88	1.16	0.27042	0.0292424	1.08117	9.98943e-14	1.16711	4.73372e-16	-0.81075	1.6219e-09	0.0859413	0.127146	-0.896691	3.80481e-11
CL3380.Contig1_All	33.75	42.09	45.27	29.09	23.95	27.67	16.99	39.23	28.02	41.28	47.21	39.52	0.082027	8.93433e-11	-0.583955	0	-0.514814	2.75181e-283	0.665982	0	0.069141	6.19434e-06	0.596841	0
CL16513.Contig11_All	0.89	0.45	0.28	0.29	0.27	0.49	0.13	0.32	0.32	0.31	0.25	0.3	-0.918093	8.08724e-08	-0.610095	0.000112153	-1.06798	2.30938e-09	-0.307998	0.020271	-0.457882	0.00796604	0.149884	0.121935
Unigene50267_All	9.96	4.51	8.98	5.86	14.73	5.6	2.67	5.52	5.34	2.1	4.36	3.26	-1.26007	1.45705e-61	0.16348	0.00225255	-0.777412	1.93555e-28	-1.42355	9.44705e-83	-0.940892	5.69641e-43	-0.482658	1.56295e-08
CL8832.Contig3_All	0.37	0.74	0.34	0.68	0.34	0.6	1.16	1.22	0.41	0.32	0.45	0.99	0.291185	0.0766594	0.161102	0.150757	0.956993	6.76343e-05	0.130083	0.100833	0.795891	0.000480666	-0.665808	0.00184234
CL15605.Contig2_All	23.35	18.05	20.18	28.98	26.75	28.88	23.92	30.36	24.82	12.71	30.67	28.54	0.237254	1.39198e-09	0.463066	2.89554e-33	0.37793	4.22652e-22	-0.225812	2.62084e-10	-0.085136	0.00647722	-0.140676	6.89266e-05
CL16450.Contig16_All	2.32	3.63	1.58	3.64	7.47	5.65	2.11	4.27	3.14	2.22	1.87	2.29	-0.232771	1.8019e-06	1.15513	8.51573e-184	0.347513	3.07105e-14	-1.3879	7.93371e-246	-0.807618	1.39201e-101	-0.580284	6.16947e-34
CL2401.Contig10_All	2.2	2.34	1.9	1.01	1.16	0.72	0.27	0.44	0.25	0.88	0.73	0.46	-1.62557	1.24507e-37	-1.15345	6.70172e-23	-2.73018	6.8375e-70	-0.472118	0.000485868	-1.57672	4.94171e-17	1.10461	3.01751e-08
CL5242.Contig2_All	0.17	0.23	0.1	0.33	0.28	0.38	0.72	0.25	0.45	0.3	0.54	0.32	1.22116	6.61575e-05	0.985873	0.0014246	1.50548	6.99895e-07	0.235287	0.0644408	0.519604	0.0156276	-0.284317	0.0694353
CL12424.Contig1_All	0.75	0.35	0.24	0.27	0.2	0.6	0.18	0.22	0.32	0.19	0.21	0.31	-0.920508	1.9041e-05	-0.316112	0.0373323	-0.895169	3.66457e-05	-0.604397	0.00228155	-0.579057	0.00553783	-0.0253393	0.21711
CL3227.Contig1_All	2.14	2.74	3.12	3.15	5.6	4.6	2.19	3.26	0.94	1.77	4.08	2.06	-0.0106139	0.204667	0.740854	5.22303e-22	-0.310198	0.000340471	-0.751468	5.59435e-23	-1.05105	4.53519e-38	0.299584	0.000435178
Unigene8987_All	3.43	2.74	3.68	5.71	5.83	6.09	6.44	7.02	6.17	2.05	3.83	4.32	0.0638533	0.125506	0.843536	2.15326e-22	1.00979	6.37541e-33	-0.779683	3.07476e-20	0.166258	0.00783218	-0.94594	6.52826e-30
CL6044.Contig4_All	4.61	3.31	3.1	2.73	8.92	6.8	0.87	1.26	2.22	0.96	2.32	1.25	-1.27368	2.37131e-35	0.746358	7.90798e-25	-1.33226	2.39604e-37	-2.02004	4.61416e-111	-2.07862	1.40471e-113	0.0585785	0.159476
Unigene296_All	1.67	1.47	1.62	2.1	1.77	2.52	1.36	2.01	1.77	0.61	1.44	0.84	-0.718465	6.25308e-17	0.427901	1.03822e-09	0.122965	0.0333103	-1.14637	1.7632e-46	-0.304936	5.98719e-06	-0.841431	2.85619e-23
CL95.Contig89_All	25.94	14.75	38.56	22.2	7.67	14.64	7.68	23.39	15.45	15.87	19.1	26.56	-0.35925	8.14368e-51	-0.828103	1.41614e-221	-0.755768	7.08341e-189	0.468852	1.08482e-64	0.0723348	0.00534991	0.396517	1.59239e-47
Unigene7370_All	1.4	0.91	1.23	1.09	0.55	1.51	0.68	1.14	1.34	0.46	0.91	0.52	-0.895341	1.73989e-12	-0.169441	0.0410119	-0.151888	0.056771	-0.7259	1.12073e-08	0.0175537	0.217291	-0.743454	9.31197e-09
Unigene57662_All	1.14	1.33	0.88	1.97	3.21	2.6	1.06	2.02	1.66	0.23	0.41	0.38	-1.69994	1.33214e-31	1.21765	1.96344e-43	0.510305	1.65671e-07	-2.91759	1.84466e-135	-0.707342	1.64554e-18	-2.21025	1.76627e-61
CL9951.Contig2_All	0.92	1.24	0.44	0.84	1.51	1.63	1.2	1.07	0.86	0.44	0.77	0.9	-0.293119	0.00235157	0.619265	2.3565e-11	0.274767	0.00226367	-0.912384	6.0685e-21	-0.344498	5.2888e-05	-0.567886	2.70985e-08
CL2009.Contig32_All	3.29	2.13	3.11	2.38	1.97	2.56	0.55	1.98	1.81	1.16	1.73	1.66	-0.902434	1.22226e-59	-0.300358	1.12799e-09	-0.961738	1.75654e-65	-0.602076	2.36137e-25	-0.66138	6.61225e-29	0.0593034	0.0953006
CL16830.Contig5_All	1.63	0.61	1.45	1.89	1.7	2.19	0.53	1.96	1.53	0.47	1.45	0.79	-0.440617	5.03217e-05	0.650241	7.11382e-12	0.137202	0.0596934	-1.09086	1.46765e-26	-0.513039	2.45854e-08	-0.577819	1.44983e-07
CL10067.Contig2_All	16.9	14.44	13.15	15.79	35.27	19.7	9.91	20.72	17.17	4.62	11.25	6.19	-1.00766	2.40399e-153	0.670379	4.91889e-121	0.114943	0.000121658	-1.67804	0	-0.555436	1.63775e-86	-1.1226	1.00286e-196
CL15625.Contig1_All	3.03	1.99	2.96	3.49	4.2	3.75	2.57	3.43	3.59	1.57	2.95	2.42	-0.196646	0.00249113	0.51997	1.47669e-15	0.272614	3.20784e-05	-0.716616	1.1807e-26	-0.247357	3.53218e-05	-0.469259	1.7861e-11
CL2108.Contig7_All	11.93	13.92	12.18	19.17	16.07	13.47	16.37	14.74	19.1	10.57	20.12	26.24	0.590426	1.68701e-62	0.360381	1.42242e-22	0.408918	6.92744e-29	0.230044	1.38309e-12	0.0485369	0.0475489	0.181507	1.91135e-08
Unigene47306_All	0.4	0.36	0.36	0.44	0.48	0.6	1.24	0.75	0.4	0.28	0.28	0.23	-0.499126	0.0608308	0.44283	0.0627529	1.11166	0.000217644	-0.941956	0.00301319	0.668832	0.0081616	-1.61079	1.56344e-06
CL12199.Contig1_All	10.74	12.27	9.06	20.98	22.19	15.24	14.14	16.61	14.86	4.88	9.48	11.15	-0.316156	8.68186e-08	0.869947	9.84356e-69	0.524027	2.62116e-23	-1.1861	2.67982e-114	-0.345921	1.83879e-14	-0.840183	1.44335e-51
CL5247.Contig11_All	1.21	0.85	0.41	1.14	1.2	1.79	1.04	0.67	1.08	0.31	0.68	0.8	-0.450195	0.00173982	0.742771	9.76373e-09	0.183395	0.0645356	-1.19297	1.66898e-17	-0.559376	5.98082e-06	-0.63359	2.21408e-05
CL1444.Contig5_All	29.35	16.23	25.45	8.8	25.48	23.75	2.26	4.86	3.23	6.54	10.68	3.32	-1.78713	0	-0.291353	4.07427e-31	-2.76623	0	-1.49577	0	-2.47488	0	0.979102	1.81693e-77
CL1055.Contig1_All	10.56	23.43	11.85	11.2	13.84	15.61	9.5	7.85	9.91	5.17	12.06	12.97	-0.589232	1.23882e-29	-0.169974	0.000199351	-0.73685	1.27326e-42	-0.419257	2.11974e-15	-0.566876	1.49185e-24	0.147619	0.00424014
CL17104.Contig1_All	0.33	0.36	0.15	0.17	0.36	0.34	0.14	0.28	0.3	0.21	0.23	0.1	-0.655588	0.0400463	0.0467908	0.223066	-0.205598	0.173758	-0.702379	0.0210453	-0.252389	0.144824	-0.44999	0.0893675
CL16357.Contig7_All	1	1.25	1.23	3.13	2.52	1.68	2.08	2.93	2.86	1.07	3	1.64	0.716584	3.0041e-22	1.07672	1.74422e-53	1.18187	3.58406e-66	-0.36014	1.36162e-09	0.105143	0.0208453	-0.465282	9.64748e-15
CL1485.Contig13_All	0.83	0.36	0.49	0.72	0.52	0.53	0.43	0.27	0.35	0.06	0.17	0.22	-1.90402	7.50549e-19	0.0793631	0.157227	-0.683226	4.57305e-05	-1.98338	4.63258e-21	-0.762589	5.16626e-06	-1.22079	2.49184e-07
CL11575.Contig1_All	0.49	0.96	0.79	0.71	0.28	0.43	0.34	1.11	0.57	0.27	0.5	0.56	-0.740527	8.59347e-05	-0.660924	0.000362234	-0.131658	0.135019	-0.0796023	0.113588	0.529267	0.00345573	-0.608869	0.00110712
CL642.Contig30_All	1.74	1	0.57	1.7	0.54	1.66	0.83	0.55	1.6	0.71	0.47	0.88	-0.680304	3.44949e-08	0.240217	0.0088981	-0.145015	0.0654073	-0.920521	1.08666e-14	-0.385233	0.000222209	-0.535288	1.58251e-05
Unigene831_All	3.14	3.4	6.24	12.12	12.45	10.76	10.72	11.54	6.33	4.1	7.72	7.74	0.621355	1.77541e-27	1.47033	8.34159e-193	1.17231	6.48632e-111	-0.848978	1.47786e-81	-0.298025	1.49791e-13	-0.550953	6.55833e-32
CL7402.Contig6_All	0.82	0.7	0.5	2.9	1.68	2.39	2.39	1.9	2.24	0.46	0.75	1.05	0.171283	0.081692	1.79002	6.01209e-42	1.69996	8.60501e-37	-1.61874	3.26669e-37	-0.0900611	0.0995162	-1.52868	5.01224e-32
Unigene66297_All	0.1	0.39	0.3	0.2	0.58	0.39	0.38	0.57	0.58	0.58	0.38	0.28	0.686741	0.0723337	0.58722	0.101592	1.01213	0.031541	0.0995206	0.133404	0.424906	0.118945	-0.325385	0.136843
CL2112.Contig5_All	4.88	6.31	4.31	19.57	10.25	8.26	7.11	12.6	12.72	2.23	6.84	5.48	-0.0761026	0.0991757	1.30351	3.43453e-74	1.08431	4.30391e-48	-1.37962	1.3605e-81	-0.219206	9.63037e-05	-1.16041	1.00055e-53
CL5436.Contig4_All	0.69	0.45	1.26	0.8	1.18	0.74	1.18	1.03	0.78	1.11	0.98	1.05	0.393081	0.00301486	0.179403	0.0731452	0.319119	0.0135587	0.213678	0.0254713	0.139716	0.0972356	0.0739619	0.149904
CL10151.Contig8_All	5.45	4.58	4.39	6.18	7.24	5.05	5.29	4.86	4.66	1.87	3.83	3.44	-0.65197	2.31619e-24	0.359685	1.74549e-11	0.0457036	0.123098	-1.01165	2.36073e-63	-0.313981	2.98714e-09	-0.697674	7.11734e-28
Unigene35680_All	6.62	5.97	4.77	5.72	7.43	7.11	3.6	7.05	4.41	2.84	4.12	3	-0.79488	1.79459e-28	0.225544	8.20937e-05	-0.190557	0.00137121	-1.02042	1.73849e-49	-0.416101	1.99261e-11	-0.604323	3.38176e-16
CL7560.Contig2_All	21.73	26.96	22.1	68.23	38.3	31.32	27.14	30.03	36.22	11.37	24.77	18.72	-0.355936	2.71362e-18	0.967561	4.39341e-192	0.414343	1.57043e-30	-1.3235	0	-0.553218	3.43253e-73	-0.770279	5.97967e-90
CL4310.Contig12_All	0.17	0.1	0.13	0.19	0.3	0.12	0.27	0.27	0.44	0.17	0.38	0.16	0.799254	0.0013306	0.587102	0.0138525	1.28638	2.88579e-07	0.212151	0.0654939	0.699274	0.00100765	-0.487122	0.00896754
CL1962.Contig9_All	1.73	5.92	3.7	10.81	6.54	4.74	13.5	7.42	10.45	4.94	8.09	10.32	1.05592	7.18406e-40	0.967884	1.38408e-32	1.47921	2.72781e-87	0.0880315	0.0330627	0.511325	4.27759e-16	-0.423294	4.96082e-12
CL8886.Contig4_All	1.05	1.52	1.17	2.18	1.32	2.05	1.27	3.14	3.02	1.6	1.33	1.52	0.257699	0.00629361	0.573829	3.26406e-08	1.0051	1.68356e-24	-0.31613	0.000371693	0.431269	6.82681e-07	-0.7474	1.15593e-15
Unigene58550_All	0.67	0.15	0.55	0.42	0.18	0.49	0.12	0.18	0.21	0.06	0.12	0.09	-2.33563	1.32095e-07	-0.31967	0.089624	-1.39226	0.000151135	-2.01596	6.82101e-06	-1.07259	0.00331759	-0.943363	0.0299984
CL16725.Contig73_All	1.24	1.04	1.03	1.96	1.73	1.93	0.8	2.47	1.51	0.48	1.75	1.11	0.0169186	0.202303	0.76647	1.65638e-12	0.543918	9.44114e-07	-0.749551	1.78405e-12	-0.222552	0.00880872	-0.526999	1.48237e-06
CL16718.Contig32_All	0.12	0.08	0.08	0.15	0.11	0.04	0.06	0.12	0.14	0.13	0.38	0.17	1.26675	1.82517e-07	0.0577657	0.211028	0.169308	0.161539	1.20898	2.73346e-07	0.111542	0.180968	1.09744	2.8648e-06
CL10640.Contig3_All	0.89	0.77	0.52	0.53	1.21	1.87	0.1	0.27	0.24	0.1	0.2	0.08	-2.54713	2.29741e-17	0.728693	1.03274e-05	-1.82484	6.47113e-12	-3.27582	4.6705e-35	-2.55354	3.36978e-27	-0.722288	0.0240017
CL2491.Contig18_All	2.5	1.04	1.8	1.12	0.79	1.12	4.66	3.72	3.93	4.55	5.54	6.04	1.60076	2.18336e-91	-0.816407	7.32853e-12	1.21176	3.09277e-46	2.41717	6.23195e-156	2.02816	2.23702e-95	0.389008	6.8329e-10
CL9087.Contig2_All	2.15	3.41	2.63	2.03	4.64	3.7	1.2	4.97	4.48	1.38	3.27	2.8	-0.133357	0.0125927	0.340347	1.4176e-08	0.390687	7.74278e-11	-0.473704	1.02705e-14	0.0503398	0.104362	-0.524044	1.89725e-17
CL14962.Contig3_All	4.5	4.7	7.56	6.27	6.08	6.24	1.95	5.47	4.77	3.24	5.22	4.28	-0.389517	7.52732e-12	0.152037	0.00146336	-0.447374	1.46621e-14	-0.541554	2.00388e-22	-0.599411	7.32643e-26	0.0578573	0.0924609
Unigene65356_All	0.51	0.28	0.28	0.14	0.36	0.51	0.07	0.24	0.28	0.12	0.27	0.09	-1.12775	0.000511802	-0.0695509	0.202918	-0.847444	0.00472097	-1.0582	0.000669137	-0.777893	0.00813238	-0.280304	0.125674
CL16147.Contig20_All	0.12	0.15	0.16	0.26	0.16	0.07	0.4	0.3	0.6	0.23	0.31	0.22	0.842825	0.00516711	0.220428	0.15047	1.62649	8.17218e-08	0.622397	0.0120759	1.40607	1.21102e-06	-0.783669	0.00115948
Unigene38471_All	4.38	4	4.16	7.77	9.12	7.63	2.8	4.23	5.89	2.35	3.98	2.32	-0.527985	2.61225e-09	0.971111	1.10306e-43	0.0562733	0.141164	-1.4991	1.02163e-85	-0.914838	1.68628e-39	-0.584258	4.31455e-11
CL1885.Contig1_All	1.56	1.42	1.08	1.34	1.98	2.1	0.65	1.14	1.58	0.38	0.63	0.69	-1.25012	3.28879e-18	0.418692	4.99387e-05	-0.260198	0.0117773	-1.66881	9.89705e-36	-0.678889	1.44641e-09	-0.989923	3.55784e-11
CL16145.Contig78_All	1.06	0.73	0.5	0.68	0.52	0.79	0.21	0.63	0.76	0.27	0.26	0.36	-1.35774	4.10522e-28	-0.200159	0.0157442	-0.50526	1.26255e-06	-1.15758	6.04525e-20	-0.305101	0.00224673	-0.85248	1.6368e-10
CL15303.Contig6_All	5.78	8.11	9.53	8.92	4.18	4.55	8.11	7.98	8.62	9.88	18.88	18.87	1.02956	9.91852e-182	-0.403646	1.43331e-18	0.0839548	0.0163856	1.4332	3.77096e-305	0.487601	8.09239e-27	0.945603	2.11453e-157
CL869.Contig1_All	11	13.37	10.33	13.76	5.08	8.97	13.51	11.06	5.64	2.92	7.89	7.5	-0.909733	3.57022e-46	-0.313404	2.97595e-08	-0.184517	0.000460851	-0.596329	3.01521e-19	0.128887	0.0103571	-0.725216	3.67636e-28
CL17179.Contig14_All	2.57	3.37	1.51	2.73	3.95	2.53	1.97	2.99	2.61	1.52	2.33	3.09	-0.0951073	0.0238362	0.308176	1.58418e-09	0.0326803	0.155239	-0.403283	5.48742e-15	-0.275496	5.28963e-08	-0.127788	0.00655953
CL2135.Contig35_All	0.84	0.68	0.56	0.49	0.79	1.04	0.21	0.56	0.37	0.2	0.25	0.37	-1.33104	4.94246e-22	0.156514	0.0435006	-0.855325	1.57099e-11	-1.48756	1.06296e-28	-1.01184	3.8305e-16	-0.47572	0.00109252
Unigene18053_All	0.39	0.37	0.28	0.36	0.6	0.41	0.29	0.15	0.49	0.33	0.72	0.48	0.573689	0.0178618	0.414055	0.0568532	-0.151793	0.182962	0.159634	0.0924864	-0.565848	0.026536	0.725482	0.00711928
Unigene30751_All	2.09	6.07	3.8	17.03	16.33	8.36	11.21	16.44	14.9	1.21	2.7	1.98	-1.01167	3.67253e-27	1.80724	1.31836e-214	1.84437	1.34283e-225	-2.81891	0	0.0371325	0.103929	-2.85605	0
CL17221.Contig29_All	0.62	0.4	0.28	0.24	0.5	0.37	0.21	0.27	0.12	0.08	0.05	0.07	-2.75516	9.56424e-41	-0.23175	0.0259038	-1.10087	9.86642e-13	-2.5234	2.98448e-32	-0.869124	4.44252e-08	-1.65428	2.09027e-11
CL6385.Contig10_All	14.16	5.24	8.09	12.82	6.38	11.1	4.57	6.1	5.25	6.19	4.63	8.09	-0.531709	8.57161e-32	0.144785	0.000145665	-0.778829	4.14553e-60	-0.676494	5.1091e-53	-0.923614	7.91146e-88	0.24712	9.19992e-07
CL2298.Contig26_All	0.88	0.74	0.71	1.67	0.61	0.76	3.13	1.13	1.3	1.15	2.63	3.08	1.56664	9.53202e-47	0.390359	0.00137392	1.2618	9.04159e-28	1.17628	3.92979e-31	0.871444	5.65941e-16	0.304833	0.000197601
Unigene46845_All	0.4	0.22	0.34	0.55	0.28	0.26	0.29	0.25	0.54	0.22	0.18	0.45	-0.175097	0.136085	0.191712	0.135603	0.178765	0.153029	-0.366808	0.037369	-0.0129467	0.235198	-0.353862	0.0644403
CL7399.Contig4_All	0.64	0.26	0.4	0.52	0.59	0.63	1.55	1.57	1.45	0.63	2.24	2.08	1.94106	2.57492e-26	0.424017	0.0239912	1.82881	1.79447e-22	1.51705	1.93318e-19	1.4048	6.48906e-16	0.11225	0.103673
Unigene2843_All	0.15	0.22	0.13	0.35	0.83	1.35	0.07	0.16	0.13	0.02	0.02	0.05	-2.44666	1.75935e-05	2.3454	2.9567e-19	-0.420833	0.0957347	-4.79206	1.70377e-33	-2.76624	1.18284e-22	-2.02583	0.000621662
CL9282.Contig8_All	4.7	4.17	4.7	6.5	5.42	5.41	6.54	5.25	6.31	2.05	4.47	3.65	-0.408472	1.26593e-08	0.357133	1.70666e-08	0.424232	2.02821e-11	-0.765605	6.3871e-29	0.0670987	0.0753602	-0.832704	4.19567e-34
CL185.Contig5_All	0.3	0.4	0.44	0.42	0.58	0.59	0.41	0.39	0.27	0.29	0.38	0.73	0.303404	0.0194105	0.474769	0.00133364	-0.0910546	0.17016	-0.171365	0.0447497	-0.565823	0.000264149	0.394458	0.00647011
CL8526.Contig4_All	2.98	1.41	5.21	1.03	1.98	2.9	0.63	1.76	1.16	0.5	0.97	1.1	-1.8945	7.19214e-85	-0.700489	6.55384e-19	-1.42352	1.77546e-56	-1.19402	4.74877e-28	-0.723027	7.05802e-13	-0.470989	6.04799e-05
Unigene42270_All	2.95	2.87	2.24	2.44	3.07	1.9	3.72	4	3.58	1.1	3.62	2.8	-0.0946565	0.0562988	-0.120949	0.0356922	0.494457	7.43918e-13	0.0262923	0.115369	0.615406	3.51866e-18	-0.589114	4.14392e-17
CL4668.Contig4_All	0.23	0.85	0.55	0.97	1.04	0.8	1.28	1.66	0.95	0.36	0.39	0.45	-0.453349	0.00409882	0.783305	6.61988e-08	1.26013	2.47594e-20	-1.23665	3.39867e-15	0.476827	2.95782e-05	-1.71348	3.02388e-31
CL5196.Contig26_All	6.52	6.13	9.82	4.9	3.76	3.35	14.22	7.53	6.4	13.76	26.93	29.99	1.65937	0	-0.900754	4.62784e-68	0.328509	2.75019e-15	2.56012	0	1.22926	2.10165e-139	1.33086	0
CL4049.Contig4_All	1.73	2.8	1.01	0.57	1.18	1.27	0.5	1.02	1.49	0.66	1.54	1.26	-0.673943	1.02079e-19	-0.872135	1.74227e-29	-0.874114	1.69165e-29	0.198192	0.00423444	-0.00197865	0.239155	0.200171	0.00673051
CL2372.Contig14_All	1.61	1.43	1.78	2.73	1.81	1.85	2.07	2.2	2.94	0.86	2.23	1.91	0.056408	0.129425	0.41037	9.48718e-07	0.588847	1.34182e-12	-0.353962	7.6209e-06	0.178478	0.00761502	-0.532439	6.61431e-11
CL16559.Contig46_All	1.18	2.06	1.76	1.61	0.96	1.13	1.29	2.29	2.4	1.38	2.83	2.08	0.331434	3.4769e-05	-0.433492	3.72746e-06	0.266285	0.00081272	0.764926	1.91316e-17	0.699776	3.44027e-14	0.0651497	0.10843
Unigene37073_All	0.66	0.44	0.36	0.32	0.42	0.34	0.16	0.34	0.18	0.1	0.17	0.07	-2.08623	2.10225e-14	-0.437248	0.0116654	-1.08944	1.471e-06	-1.64899	7.88535e-09	-0.652187	0.00344077	-0.996799	0.000985096
CL15496.Contig6_All	1.7	1.73	1.44	3.26	2.95	2.43	1.87	2.83	2.01	0.64	1.14	1.48	-0.569113	2.40421e-10	0.829316	9.65075e-31	0.471562	4.70883e-10	-1.39843	4.87538e-70	-0.357754	4.00855e-08	-1.04068	6.10129e-35
CL7098.Contig8_All	1.96	1.75	1.31	2.88	1.9	2.52	1.17	2.02	1.38	0.5	0.8	0.76	-1.28489	1.2972e-34	0.543749	8.09294e-13	-0.122722	0.0490907	-1.82864	4.15423e-82	-0.66647	1.4953e-17	-1.16217	2.07041e-27
CL9545.Contig1_All	1.36	1.5	1.11	0.94	2.65	1.87	0.4	0.94	1.25	0.35	0.68	0.84	-1.07807	9.77085e-17	0.463137	1.89204e-06	-0.605227	2.9824e-07	-1.54121	1.00992e-37	-1.06836	9.91167e-22	-0.472847	0.000420535
CL14215.Contig2_All	0.99	0.6	0.7	0.62	0.86	0.96	0.52	0.46	1.23	0.54	1.18	0.63	0.0504316	0.186624	0.0974151	0.167453	-0.0379142	0.228898	-0.0469835	0.127919	-0.135329	0.141074	0.0883458	0.166515
Unigene65792_All	6.94	7.25	6.72	7.07	10.36	8.33	5.96	7.23	9.42	2.58	5.95	4.96	-0.622792	9.12824e-21	0.303495	5.85415e-08	0.123618	0.0127882	-0.926287	1.80796e-48	-0.179877	0.000539896	-0.74641	5.29395e-30
Unigene3690_All	2.18	0.95	1.15	1.17	2.15	2.29	0.48	1.27	1.32	0.4	0.59	0.45	-1.55995	1.13249e-37	0.391782	3.20132e-06	-0.46582	2.07446e-06	-1.95174	2.81877e-66	-0.857602	1.00407e-19	-1.09413	8.47638e-17
CL3714.Contig8_All	13.23	26.22	10.96	32.64	30.87	30.17	40.29	21.99	28.58	11.84	20.18	30.16	0.331305	4.23009e-08	0.902517	1.35087e-57	0.877521	6.23855e-54	-0.571212	2.09838e-27	-0.0249964	0.157781	-0.546216	1.20034e-24
Unigene41059_All	0.62	0.53	0.23	0.49	0.33	1.02	0.16	0.62	0.61	0.07	0.18	0.17	-1.75182	5.315e-15	0.422064	0.00243885	0.0305344	0.226943	-2.17389	1.69522e-25	-0.391529	0.00414666	-1.78236	1.62713e-15
CL14857.Contig6_All	0.56	0.54	0.52	0.52	0.72	0.42	0.28	0.53	0.7	0.32	0.65	0.53	-0.117258	0.113542	0.0414529	0.197893	-0.0958562	0.155711	-0.158711	0.0530672	-0.137309	0.106848	-0.0214023	0.211218
Unigene60465_All	4.8	3.41	4.58	4.38	4.32	3.38	1.86	2.49	3.23	2.18	5.3	4.32	-0.110328	0.0185838	-0.0792666	0.0546246	-0.748747	1.11567e-28	-0.0310612	0.0971045	-0.669481	1.12888e-22	0.63842	9.12243e-21
Unigene6933_All	1.05	0.6	0.62	0.69	1.15	1.76	0.5	1	1.11	0.3	0.45	0.36	-1.02889	1.54425e-11	0.664721	5.14279e-09	0.210036	0.0309333	-1.69361	5.22534e-35	-0.454685	2.19666e-05	-1.23892	7.83191e-17
CL14338.Contig1_All	0.81	0.35	0.57	0.49	0.6	0.79	0.5	0.37	0.38	0.35	0.66	0.46	-0.220316	0.0378856	0.122313	0.106274	-0.46579	0.00120777	-0.342629	0.00373032	-0.588103	5.77704e-05	0.245474	0.0371093
CL15218.Contig11_All	0.97	0.54	0.95	0.9	1.42	2.64	0.42	0.96	1.39	0.57	0.63	0.64	-0.404013	0.00550195	1.01279	2.98237e-14	0.184272	0.0723544	-1.41681	2.05639e-23	-0.828521	1.23633e-10	-0.588285	0.000149977
Unigene38041_All	0.88	0.48	0.26	0.65	0.79	1.16	0.16	0.38	0.47	0.14	0.29	0.14	-1.48824	5.11355e-06	0.697934	0.00109957	-0.649155	0.0101	-2.18618	1.45549e-13	-1.34709	1.53155e-07	-0.839089	0.00874849
Unigene50681_All	3.45	3.55	4.22	4.98	4.84	4.37	2.66	4.16	3.67	0.99	3.26	1.94	-0.842744	3.36796e-11	0.346248	0.000404953	-0.0751074	0.144968	-1.18899	5.05369e-23	-0.421355	3.66057e-05	-0.767637	2.37437e-09
CL10760.Contig3_All	17.38	15.35	5.12	13.23	18.94	19.47	11.05	15.83	16.03	10.7	17.64	15.53	0.222779	4.68334e-07	0.45109	1.1848e-24	0.194429	1.20556e-05	-0.228311	1.78558e-08	-0.256661	1.09322e-09	0.0283498	0.131553
CL361.Contig2_All	1.65	2.08	1.26	1.03	1.59	2.45	0.27	0.66	1.08	0.42	1.28	1.39	-0.681371	1.35362e-08	0.0256595	0.202788	-1.30308	2.13857e-21	-0.707031	2.07801e-09	-1.32874	2.5907e-22	0.621711	2.27992e-05
CL3958.Contig14_All	0.33	0.42	0.71	1.07	0.59	0.6	1.43	1.09	0.99	0.6	1.5	1.22	1.20154	2.09611e-12	0.647789	0.00028456	1.28189	5.38804e-14	0.553753	7.70454e-05	0.634104	1.64692e-05	-0.0803509	0.14033
CL7137.Contig1_All	1.95	2.79	1.9	2.87	3.02	3.1	1.76	1.99	2.56	1.34	3.06	2.22	0.00116811	0.22097	0.440663	3.32867e-07	-0.0656606	0.142353	-0.439495	1.68591e-07	-0.506324	9.80623e-09	0.0668287	0.124112
CL2475.Contig37_All	3.44	4.87	4.15	6.5	5.8	3.97	3.68	4.71	4.68	2.91	4.6	5.24	0.0410171	0.135705	0.388809	5.94813e-09	0.0790244	0.0825289	-0.347792	6.28158e-08	-0.309785	2.00081e-06	-0.0380073	0.146758
Unigene10543_All	0.32	0.17	0.44	0.38	0.43	0.51	0.26	0.25	0.26	0.07	0.14	0.15	-1.39203	9.04762e-18	0.502001	9.41726e-06	-0.273158	0.0149052	-1.89403	4.35378e-37	-0.775159	2.36889e-10	-1.11887	3.71259e-11
Unigene53564_All	2.55	1.58	2.31	1.67	1.47	1.93	0.93	2.6	2.4	2.06	3.06	3.01	0.361307	0.012779	-0.337872	0.0299622	-0.085993	0.181569	0.699179	5.56314e-05	0.251879	0.0649294	0.4473	0.00469281
CL1082.Contig24_All	0.79	2.26	1.34	2.07	4.43	2.54	3.96	3.43	3.02	1.12	0.77	1.74	-0.261581	0.0101422	1.04419	5.28314e-26	1.25538	2.7913e-39	-1.30578	6.7018e-37	0.211183	0.00301051	-1.51696	4.7275e-52
CL683.Contig40_All	6.69	4.66	5.44	5.95	5.94	6.76	4.37	5.86	5.49	4.36	8.6	6.07	0.18983	0.00131495	0.155253	0.00677598	-0.0816059	0.0737947	0.0345776	0.0941443	-0.236859	0.000195058	0.271436	2.10185e-05
CL6427.Contig8_All	1.01	0.47	1	1.57	1.59	2.01	0.86	1.9	1.09	0.13	0.45	0.53	-1.161	5.56774e-20	1.058	5.50085e-34	0.6403	5.47357e-12	-2.219	2.70278e-97	-0.417698	4.78824e-08	-1.8013	7.09459e-56
Unigene42340_All	1.54	0.78	1.09	0.6	1.05	0.95	0.59	0.45	0.66	0.36	0.81	0.57	-0.96617	3.32791e-09	-0.392218	0.00345736	-0.994793	2.05857e-09	-0.573952	0.000280002	-0.602575	0.00034329	0.0286226	0.209002
Unigene26792_All	1.08	1.14	0.85	1.08	1.21	0.62	0.57	0.9	0.61	0.56	0.7	0.5	-0.795624	6.71329e-08	-0.0720605	0.153905	-0.54889	7.52522e-05	-0.723564	6.01324e-07	-0.47683	0.000502512	-0.246734	0.0392697
Unigene11763_All	0.89	0.54	0.6	0.79	0.85	1.04	0.65	0.94	1.22	0.77	1.07	0.88	0.427981	0.000210959	0.404473	0.000502584	0.480085	4.98211e-05	0.023508	0.13004	0.0756123	0.136755	-0.0521044	0.159167
CL1092.Contig15_All	0.65	0.89	0.97	0.73	1.07	0.28	0.6	0.49	0.56	0.39	0.89	1	-0.127621	0.0816708	-0.261813	0.0158442	-0.596514	1.15447e-05	0.134192	0.0536114	-0.334701	0.00808122	0.468893	0.000414108
Unigene21620_All	0.55	0.62	0.5	2.34	1.82	0.95	4.16	2.74	1.27	0.77	1.66	2.45	1.56547	1.99934e-16	1.62276	1.19826e-17	2.31052	2.42609e-42	-0.0572837	0.109063	0.687762	4.13818e-08	-0.745046	3.67811e-09
Unigene13785_All	8.72	6.62	7.65	6.27	5.95	7.29	3.84	5.14	4.98	4.26	8.21	7.69	-0.186225	1.4454e-07	-0.235408	1.04696e-10	-0.7132	1.58055e-70	0.0491836	0.0334545	-0.477792	3.42494e-30	0.526976	3.25582e-37
Unigene20679_All	43.94	26.34	49.56	54.08	61.88	62.93	67.63	81.69	70.1	19.93	33.67	31.35	-0.489841	8.76135e-99	0.580217	9.03446e-198	0.882191	0	-1.07006	0	0.301974	1.92095e-73	-1.37203	0
CL3898.Contig2_All	5.39	3.82	5.6	7.37	8.46	6.77	4.39	5.56	6.12	0.89	2	2.73	-1.38319	9.17793e-45	0.615245	1.06588e-18	0.132483	0.0272948	-1.99843	7.33929e-113	-0.482762	1.21352e-12	-1.51567	1.66799e-55
Unigene22947_All	2.32	2.22	2.37	2.82	1.59	2.18	1.55	2.57	2.21	2.19	3.56	3.54	0.429614	9.64901e-19	-0.0656868	0.0634366	-0.120457	0.00922717	0.495301	4.9249e-24	-0.0547706	0.0884952	0.550072	3.30084e-28
CL15098.Contig4_All	23.9	15.71	21.89	19.26	24.68	21.89	10.52	18.98	17.85	8.35	18.12	13.5	-0.61142	1.37066e-46	0.102037	0.00255132	-0.361789	9.62384e-19	-0.713457	3.38076e-65	-0.463826	1.49459e-30	-0.249631	2.04472e-08
CL16338.Contig7_All	4.56	4.94	3.97	2.74	5.79	5.23	1.17	2.41	2.28	1.2	1.83	2.58	-1.25698	4.34434e-63	0.0301957	0.159637	-1.18967	2.02922e-57	-1.28718	5.17849e-67	-1.21987	9.33566e-61	-0.0673096	0.11866
Unigene44878_All	0.72	0.46	0.69	0.31	0.38	0.52	0.2	0.53	0.55	0.14	0.56	0.38	-0.795306	2.38379e-11	-0.638872	3.21876e-08	-0.544902	1.39681e-06	-0.156434	0.0417001	0.0939702	0.126311	-0.250404	0.0177292
Unigene41304_All	2.21	1.86	2.54	2.47	3.64	2.92	1.03	2.83	3.94	0.9	2.32	1.38	-0.522209	3.23416e-11	0.452164	1.45762e-11	0.245201	0.000209898	-0.974373	4.65259e-40	-0.206962	0.000581732	-0.76741	1.15894e-23
CL11374.Contig5_All	4.24	2.67	3.72	2.74	2.57	2.77	1.72	3	2.83	1.28	2.92	3.16	-0.526783	2.98661e-39	-0.39401	1.37563e-23	-0.487349	6.22699e-34	-0.132773	0.000431145	-0.0933383	0.0100567	-0.0394344	0.0959495
Unigene48565_All	2.87	0.92	2.18	2.11	1.21	1.89	0.51	0.95	1.04	0.41	0.84	0.5	-1.77143	2.28512e-81	-0.192833	0.00234818	-1.24825	1.05257e-48	-1.5786	3.28432e-61	-1.05542	4.12983e-33	-0.52318	2.48559e-06
CL9825.Contig40_All	1.04	0.53	0.95	0.92	0.25	0.88	0.86	1.76	1.3	1.18	2.82	2.63	1.3989	1.64648e-45	-0.298276	0.00845547	0.643405	7.4944e-09	1.69718	4.80276e-60	0.94168	2.11776e-15	0.755499	1.01444e-17
CL1996.Contig16_All	5.48	7.03	3.53	10.4	9.19	5.8	5.78	7.12	7	5.86	9.79	8.22	0.579155	8.15986e-34	0.666292	4.48923e-45	0.319795	1.2358e-10	-0.0871369	0.00754223	-0.346497	7.71509e-15	0.259361	5.41835e-09
CL5127.Contig10_All	2.05	5.76	2.99	8	8.32	4.78	13.99	9.95	7.71	1.53	2.13	3.54	-0.574026	3.70814e-12	0.969642	2.11862e-51	1.55873	1.59729e-158	-1.54367	9.40944e-106	0.589089	4.51748e-33	-2.13276	1.49556e-243
Unigene41631_All	0.43	0.49	0.39	0.55	0.59	1.04	0.61	0.77	1.03	0.47	0.65	0.27	0.0907192	0.1642	0.735314	0.000255349	0.888183	1.09622e-05	-0.644595	0.000472669	0.152869	0.111373	-0.797463	4.29393e-05
Unigene31739_All	1.39	2.56	0.95	1.44	2.78	2.22	1.51	1.34	1.95	0.81	0.79	0.9	-0.96554	3.46819e-13	0.393656	9.12959e-05	-0.0241153	0.221905	-1.3592	8.93751e-28	-0.417771	4.2516e-05	-0.941425	1.82662e-12
CL6124.Contig5_All	5.04	2.27	4.92	2.85	4.34	5.41	1.2	1.49	2.46	0.65	1.06	1.08	-2.12444	2.22311e-108	0.0443702	0.133887	-1.2393	1.26339e-50	-2.16881	7.4522e-115	-1.28367	7.22202e-55	-0.885137	7.11962e-14
CL15679.Contig32_All	4.74	4.71	2.9	2.32	2.45	2.39	0.9	2.35	2.33	1.89	2.86	3.67	-0.548813	6.9318e-29	-0.785658	2.05405e-52	-1.13754	2.06246e-95	0.236845	6.59859e-06	-0.351887	1.24041e-08	0.588732	1.02052e-22
CL6969.Contig2_All	3.06	1.8	2.5	1.55	4.08	5.71	1.93	2.79	3.27	1.65	3.63	5.3	0.536974	2.08085e-07	0.624297	1.75661e-09	0.130971	0.0777965	-0.0873226	0.0597282	-0.493326	8.86211e-07	0.406003	4.06399e-05
CL4628.Contig9_All	4.61	5.46	5.43	6.28	6.41	6.22	5.35	4.46	5.02	2.99	6.98	6.24	0.0701836	0.0468587	0.288625	5.37385e-09	-0.0583154	0.083802	-0.218442	2.55616e-06	-0.34694	6.36445e-12	0.128499	0.00479652
CL1121.Contig6_All	0.44	0.29	0.52	0.34	0.09	0.22	0.23	0.75	0.88	0.38	0.59	0.38	0.112548	0.116798	-0.940821	4.62309e-07	0.581307	3.75866e-05	1.05337	5.29066e-09	1.52213	1.57105e-18	-0.468759	0.000424309
Unigene11914_All	0.05	0.05	0.11	0.13	0.09	0.22	0.19	0.15	0.31	0.09	0.06	0.1	0.283824	0.154099	1.08808	0.0161764	1.64689	0.000468781	-0.804253	0.0222864	0.558817	0.0535819	-1.36307	0.00154835
CL8713.Contig15_All	2.72	2.7	0.79	3.06	1.7	1.18	0.62	0.86	1.05	0.49	1.23	0.55	-1.44706	3.45634e-73	-0.0594507	0.0958433	-1.28717	6.65153e-61	-1.38761	2.16153e-66	-1.22772	2.35323e-54	-0.159895	0.031526
CL7868.Contig8_All	8.34	9.4	9.65	13.49	10.06	6.95	12.77	10.31	10.08	8.57	13.89	11.34	0.313958	6.98365e-09	0.160967	0.00179781	0.288827	1.30927e-07	0.152991	0.000930694	0.12786	0.00655647	0.0251312	0.155941
CL5554.Contig12_All	12.33	10.57	10.4	11.38	9.43	9.33	8.21	10.46	5.96	1.89	8.77	7.49	-0.867429	1.38707e-65	-0.140252	0.000688007	-0.42313	2.33989e-19	-0.727176	8.02699e-45	-0.282878	2.85001e-09	-0.444299	2.89861e-16
CL8626.Contig6_All	4.16	2.9	3.21	7.7	5.78	6.85	4.65	9.19	6.03	1.38	3.07	2.94	-0.471141	2.75854e-11	0.988438	8.51125e-70	0.964752	7.5528e-66	-1.45958	8.45723e-129	-0.0236861	0.160314	-1.43589	6.19613e-123
CL1328.Contig7_All	1.65	1.98	1.65	3.33	2.82	2.75	2.16	3.29	2.28	0.37	1.21	1.45	-0.793257	1.86965e-20	0.755965	1.89303e-30	0.558001	2.39867e-16	-1.54922	5.7199e-94	-0.197964	0.000394201	-1.35126	8.43526e-67
CL16483.Contig8_All	7.84	7.17	6.79	7.75	11.65	9.57	6.33	9.02	8.35	2.63	5.91	5.5	-0.629873	4.44117e-40	0.412132	3.75337e-25	0.128991	0.000851111	-1.04201	1.25984e-122	-0.283141	2.77688e-13	-0.758864	1.53623e-59
CL14901.Contig18_All	11.2	21.73	11.63	10.84	14.88	16.37	8.87	14.36	10.46	3.41	10.68	8.98	-0.94314	4.36781e-121	-0.0804649	0.00714314	-0.392473	1.3626e-26	-0.862675	3.88471e-99	-0.312008	5.03229e-17	-0.550667	3.42846e-37
Unigene36432_All	0.08	0.2	0.09	0.07	0.06	0.07	0.05	0.08	0.1	0.07	0.12	0.04	-0.690151	0.000429354	-0.966294	7.99734e-06	-0.688235	0.000561626	0.276143	0.0461818	0.278058	0.0777948	-0.00191537	0.229306
CL16147.Contig16_All	0.58	0.68	0.25	0.73	0.95	0.86	0.8	0.89	1.18	0.28	0.57	0.45	-0.206735	0.0719555	0.754483	1.8025e-06	0.936577	1.94289e-09	-0.961218	3.28075e-09	0.182094	0.0558287	-1.14331	1.65329e-12
CL3860.Contig7_All	1.02	1.13	0.79	1.83	4.61	2.38	1.69	2.24	2.18	0.38	0.45	0.85	-0.808879	1.72889e-08	1.58369	2.40378e-59	1.06216	2.27956e-23	-2.39257	6.04523e-102	-0.521525	8.3868e-11	-1.87104	1.38609e-52
Unigene42045_All	2.44	1.72	2.69	3.5	2.82	2.53	1.87	2.46	2.27	0.84	1.81	1.46	-0.736589	1.50679e-35	0.372039	2.25009e-14	-0.04952	0.1033	-1.10863	8.16449e-89	-0.421559	1.4545e-17	-0.687069	1.60529e-30
Unigene14982_All	16.56	13.67	13.68	11.95	20.71	16.32	6.31	12.37	11.11	6.82	13.76	9.94	-0.516073	1.19426e-30	0.160526	2.73798e-05	-0.545351	2.69163e-33	-0.676599	2.24174e-54	-0.705877	2.03449e-57	0.0292779	0.138286
CL8664.Contig1_All	4.67	3.23	3.06	3.4	3.23	4.63	1.5	2.81	3.25	1.98	3.35	2.87	-0.408522	1.96346e-06	0.042516	0.157782	-0.521945	6.65632e-09	-0.451038	9.41905e-08	-0.564461	3.17082e-10	0.113423	0.0665849
CL2784.Contig7_All	0.4	0.37	0.96	0.21	0.22	0.32	0.32	0.39	0.29	0.78	0.91	1.42	0.847682	2.67901e-13	-1.21626	3.10466e-13	-0.77954	3.15692e-07	2.06394	1.99952e-46	0.436721	0.00807064	1.62722	9.77656e-34
CL3915.Contig1_All	3.33	10.95	5.68	18.26	9.47	6.58	13.63	17.39	10.13	17.11	9.23	18.43	1.18974	1.54561e-44	0.792272	3.1787e-18	1.07665	4.30338e-35	0.397466	2.19357e-08	0.284374	7.92478e-05	0.113092	0.0313396
Unigene38832_All	3.45	8.8	6.2	14.99	12.22	4.42	14.97	15.26	16.48	6.47	13.5	14.12	0.89953	3.02924e-43	0.78376	8.36738e-32	1.35541	9.64406e-111	0.115771	0.00775089	0.571654	3.36496e-27	-0.455884	8.36789e-19
Unigene20074_All	0.22	0.17	0.3	0.33	0.37	0.54	0.25	0.77	0.74	0.17	0.31	0.16	-0.08385	0.172763	0.86387	4.01214e-05	1.37778	6.39527e-12	-0.94772	5.31217e-06	0.51391	0.00123202	-1.46163	5.63875e-13
Unigene42803_All	0.87	0.87	0.83	0.53	1.54	0.97	0.63	0.62	0.87	0.48	0.29	0.14	-1.49369	1.51128e-05	0.251617	0.0968625	-0.256362	0.112683	-1.74531	1.32817e-07	-0.50798	0.0226818	-1.23733	0.000416742
CL14281.Contig2_All	0.93	0.87	0.84	1.97	2.85	1.62	1.01	2	1.66	0.1	0.27	0.15	-2.3296	3.56129e-32	1.28627	6.19119e-34	0.832359	2.77667e-13	-3.61587	5.79884e-116	-0.453908	4.03392e-07	-3.16196	6.58181e-76
CL158.Contig19_All	2.81	1.82	1.56	2.26	5.95	4.01	1.49	2.15	1.69	0.86	1.34	0.94	-0.978416	1.69871e-33	0.982133	3.29539e-64	-0.20707	0.00148479	-1.96055	2.47736e-180	-1.1892	1.66584e-86	-0.771346	4.43047e-20
CL1070.Contig8_All	22.68	27.23	21.29	50.85	31.04	30.11	47.8	40.31	39.13	12.95	27.2	48.91	0.346098	1.70291e-15	0.661138	1.02816e-56	0.858637	1.15056e-100	-0.31504	2.57668e-16	0.197499	2.18584e-08	-0.512539	9.07254e-42
CL1568.Contig5_All	1.9	1.93	0.97	3.36	7.85	5.83	1.06	3.14	2.85	0.39	0.75	0.55	-1.49035	4.33849e-43	1.83238	1.14026e-197	0.56822	6.09793e-14	-3.32274	0	-1.26416	1.1223e-114	-2.05857	4.06126e-97
CL691.Contig46_All	0.57	0.51	0.3	0.54	0.47	0.68	0.34	0.65	1.18	0.62	0.54	0.6	0.347508	0.00573311	0.278507	0.020299	0.651497	1.97074e-06	0.0690011	0.0992961	0.372989	0.00208574	-0.303988	0.00689355
CL4047.Contig24_All	2.38	3.26	1.6	2.83	1.91	2.15	3.87	2.88	2.95	2.13	4.36	3.9	0.528256	1.2083e-14	-0.0649198	0.108914	0.428068	8.12703e-10	0.593175	7.3235e-18	0.492988	3.50084e-12	0.100187	0.0338831
CL628.Contig6_All	4.39	7.22	2.82	1.91	3	6.09	0.53	1.8	2.15	1.29	3.75	2.08	-1.0138	5.57596e-43	-0.389688	2.51056e-09	-1.67621	3.00107e-90	-0.624117	8.95523e-16	-1.28652	3.1504e-47	0.662402	1.18097e-11
CL2548.Contig11_All	16.98	13.27	22.86	27.08	9.27	12.02	8.27	14.77	15.63	12.6	22.27	12.91	-0.146193	2.85929e-05	-0.129336	0.000189732	-0.44569	3.58405e-30	-0.016857	0.103686	-0.316354	1.82931e-15	0.299497	4.06962e-14
CL904.Contig8_All	2.11	4.12	2.4	6.85	6.16	1.67	9.07	6.1	5.05	2.3	4.26	5.08	0.445294	5.02369e-06	0.773542	8.13888e-16	1.24253	4.44013e-44	-0.328249	5.20984e-05	0.468991	1.0991e-09	-0.79724	2.74842e-22
CL14829.Contig3_All	0.99	3.11	2.37	3.07	3.91	2.13	3.44	3.6	3.12	1.35	2.06	2.89	-0.0275825	0.180695	0.495825	5.21697e-08	0.662531	1.73677e-13	-0.523408	5.40799e-09	0.166705	0.0146994	-0.690113	1.77351e-14
CL17046.Contig13_All	27.82	21.93	26.04	22.73	10.6	17.54	12.97	26.6	29.82	23.64	29.73	27.32	0.0944448	2.62206e-06	-0.571409	6.85683e-130	-0.11853	3.07732e-08	0.665853	7.2076e-183	0.452878	1.36021e-78	0.212975	1.98293e-23
Unigene38753_All	3.5	7.4	7.85	15.23	8.62	6.23	19.34	10.82	10.82	4.1	9.24	5.1	0.00553751	0.216658	0.695979	2.1363e-11	1.16582	2.87415e-33	-0.690441	1.2526e-11	0.469844	2.6136e-08	-1.16029	3.15077e-33
CL11143.Contig8_All	3.11	1.69	2.43	1.39	1.3	3.49	0.43	1.61	1.35	0.59	1.03	0.77	-1.59734	7.74399e-130	-0.224321	7.64481e-06	-1.08053	3.24683e-71	-1.37302	1.2855e-89	-0.856211	4.76935e-42	-0.516807	4.66549e-11
Unigene11987_All	8.82	14.85	5.53	12.71	15.61	17.58	9.27	9.12	16.56	2.56	6.44	6.11	-0.940787	2.34415e-57	0.654951	2.83366e-48	0.267693	1.40247e-08	-1.59574	2.31319e-202	-0.387259	1.44629e-19	-1.20848	7.68177e-102
CL5375.Contig12_All	0.66	0.33	0.38	0.22	0.22	0.3	0.18	0.17	0.35	0.18	0.13	0.19	-1.4587	7.43001e-20	-0.897137	4.97372e-10	-0.943776	1.02591e-10	-0.561562	0.000580624	-0.0466383	0.197197	-0.514924	0.00223933
Unigene65383_All	1.09	1.27	0.6	1.49	1.39	1.74	1.47	1.9	1.22	1.01	0.53	0.93	-0.241637	0.0791127	0.6483	0.000654618	0.657347	0.000598767	-0.889937	7.88601e-06	0.00904757	0.234637	-0.898985	1.15883e-05
Unigene56801_All	28.3	17.78	33.51	10.98	11.96	5.6	2.75	2.14	1.01	8.96	11.59	8.72	-1.43959	0	-1.47721	0	-3.74719	0	0.0376197	0.0509015	-2.26998	0	2.3076	0
CL8011.Contig2_All	2.7	1.64	2.05	0.9	1.33	1.12	0.36	1.16	1.01	0.74	0.88	0.92	-1.3301	2.08116e-26	-0.930072	1.6083e-15	-1.32854	4.73371e-26	-0.40003	0.00133467	-0.39847	0.00262888	-0.00156025	0.228996
Unigene19670_All	1.21	1.95	1.69	0.73	0.49	0.71	0.32	0.17	0.52	0.32	0.6	0.46	-1.81468	7.64352e-53	-1.32156	1.06942e-33	-2.26715	3.58776e-69	-0.493128	0.000204285	-0.945589	3.1741e-09	0.452462	0.00336128
CL1619.Contig2_All	16.68	11.95	21.25	14.71	11.64	10.89	14.01	14.48	12.4	14.48	26.31	25.65	0.424102	5.44037e-28	-0.417287	1.37281e-20	-0.273513	2.92329e-10	0.841389	6.30299e-91	0.143774	0.00091829	0.697615	9.90449e-66
Unigene77959_All	26.76	30.2	35.34	43.44	33.14	28.99	43.93	40.34	44.67	22.02	45.11	41.27	0.240077	6.90258e-21	0.197907	1.79982e-14	0.491559	9.61162e-88	0.0421702	0.0159495	0.293652	1.34711e-34	-0.251482	1.89782e-26
CL5089.Contig7_All	5.94	5.02	3.33	3.19	7.8	6.02	2.28	2.92	4.3	3.01	2.94	3.56	-0.580025	9.3553e-16	0.252084	2.92796e-05	-0.579471	1.61911e-15	-0.832109	2.99725e-33	-0.831556	1.6673e-32	-0.000553667	0.229483
CL3864.Contig1_All	1	1.34	1.24	1.72	2.1	1.92	0.87	1.52	1.17	0.61	1.11	1.43	-0.1746	0.0811747	0.681346	3.81009e-06	0.00631761	0.253894	-0.855947	1.32249e-08	-0.675029	4.82018e-06	-0.180918	0.080934
CL16719.Contig1_All	3.59	4.1	2.38	6.19	6.16	4.31	16.06	10.49	10.05	4.31	6.04	8.28	0.896626	1.41286e-42	0.72907	4.61112e-27	1.86824	5.42511e-247	0.167556	0.00077264	1.13917	7.28146e-119	-0.971613	1.03492e-92
CL11628.Contig1_All	1.16	0.51	0.54	0.95	1.04	1.35	0.51	0.76	0.26	0.24	0.41	0.3	-1.21973	2.304e-15	0.59798	7.41318e-08	-0.52546	6.55309e-05	-1.81771	6.66279e-39	-1.12344	1.75669e-19	-0.694269	1.88666e-05
CL13526.Contig1_All	0.52	0.48	0.42	0.39	0.65	1	0.77	0.8	0.92	0.27	0.2	0.52	-0.504656	0.0613806	0.522447	0.0435633	0.825082	0.00571876	-1.0271	0.00168917	0.302635	0.0921881	-1.32974	0.00012939
CL5575.Contig6_All	8.77	6.21	5.46	4.2	7.62	7.92	1.31	4.9	4.55	2.2	2.99	1.85	-1.5337	4.44636e-247	-0.0494303	0.0484855	-0.915096	5.80646e-109	-1.48427	8.32382e-228	-0.865665	7.29547e-96	-0.618605	8.55465e-31
CL2494.Contig3_All	0.82	0.45	0.99	1.06	1.22	0.98	1.08	1.32	0.78	0.51	1.16	0.7	0.0740375	0.139193	0.529143	1.17403e-05	0.50155	3.43057e-05	-0.455105	5.32796e-05	-0.0275929	0.202385	-0.427512	0.000226191
CL7027.Contig1_All	0.7	0.88	0.42	0.52	0.39	0.29	0.74	0.71	1.77	0.36	1.61	1.3	0.721015	1.7386e-05	-0.734615	0.00050559	0.691448	4.86623e-05	1.45563	1.27684e-13	1.42606	1.34309e-12	0.0295668	0.201597
CL2653.Contig1_All	2.91	2.05	1.63	5.16	4.13	5.27	2.68	3.93	4.18	1.07	1.81	1.37	-0.630709	2.53854e-13	1.14428	8.18339e-71	0.716396	4.41532e-25	-1.77499	2.2928e-136	-0.427883	3.83666e-14	-1.3471	3.13728e-68
CL984.Contig55_All	21.3	14.54	16.69	14.38	14.02	19.7	5.95	17.34	16.81	8.01	13.86	8.63	-0.781592	2.30273e-182	-0.125214	1.31968e-07	-0.379092	3.51191e-50	-0.656377	5.35853e-124	-0.253878	1.45492e-22	-0.4025	1.19023e-43
Unigene42122_All	1.53	1.32	1	1.66	2.65	1.81	0.48	1.5	1.35	0.58	1.38	0.82	-0.467728	7.38634e-07	0.674985	3.72608e-17	-0.196513	0.0126752	-1.14271	1.04284e-39	-0.871498	1.5286e-25	-0.271214	0.00251491
CL6179.Contig5_All	1.38	1.4	1.12	1.95	2.53	1.89	1.4	1.72	2.22	0.51	0.66	0.54	-1.18403	8.05691e-33	0.707819	5.4105e-23	0.4583	6.28078e-10	-1.89185	5.82675e-103	-0.249519	7.62301e-05	-1.64233	3.0643e-71
Unigene8645_All	1.52	1.52	1.42	4.8	4.16	4.61	3.64	4.98	4.73	0.33	1	1.26	-0.767541	3.20715e-07	1.60848	7.3599e-55	1.59541	1.33526e-53	-2.37602	2.17688e-91	-0.0130766	0.214432	-2.36295	2.41596e-89
CL3045.Contig3_All	1.55	0.72	1.1	0.97	0.8	1.07	0.66	0.65	0.57	0.56	0.96	0.34	-0.842119	8.02325e-05	-0.240167	0.0699726	-0.825382	0.000131233	-0.601952	0.00220597	-0.585215	0.00494157	-0.0167366	0.2224
CL12524.Contig3_All	1.59	0.77	1.11	2.2	3.56	1.88	2.54	2.4	2.15	0.89	2.87	3.27	1.03392	3.27694e-18	1.1433	2.1044e-22	1.04284	2.64584e-18	-0.109385	0.0446011	-0.10046	0.0864373	-0.00892558	0.218149
CL2270.Contig4_All	1.88	3.03	1.89	2.71	2.41	1.48	2.09	2.6	3.63	1.79	3.21	2.67	0.180297	0.0172033	-0.0407331	0.174961	0.299043	0.000663601	0.22103	0.00430418	0.339776	0.00015864	-0.118746	0.0534597
Unigene57245_All	1.1	0.63	0.63	0.72	0.95	1.09	0.27	0.39	0.57	0.24	0.62	0.52	-0.764916	2.58662e-08	0.230099	0.0170173	-0.931964	9.85379e-11	-0.995015	6.33731e-14	-1.16206	8.33492e-17	0.167048	0.0829294
CL10877.Contig2_All	16.55	11.86	11.93	13.83	15.02	23.39	9.28	11.78	11.58	5.49	10.38	9.34	-0.674776	1.2796e-147	0.373985	8.15493e-66	-0.299806	2.71674e-34	-1.04876	0	-0.67379	3.22085e-188	-0.37497	2.97098e-42
CL15392.Contig3_All	5.92	3.63	6.64	7.13	4.82	4.03	5.12	5.67	6.95	4.85	8.03	7.04	0.30942	3.09404e-06	-0.0138707	0.210598	0.143892	0.0152263	0.323291	7.70178e-07	0.157763	0.00937627	0.165528	0.00462505
CL14639.Contig4_All	3.86	1.5	3.43	1.66	2.67	2.11	1	2.34	1.43	0.84	1.46	1.85	-1.0718	1.72978e-26	-0.448424	3.9798e-07	-0.866433	6.44385e-19	-0.623378	3.01155e-09	-0.418009	3.49307e-05	-0.205369	0.0234727
CL15106.Contig2_All	5.75	3.44	5.08	5.66	5.27	7.24	1.29	3.67	2.42	0.67	0.6	1.23	-2.50684	3.55539e-223	0.350353	2.06309e-13	-0.937966	1.12145e-54	-2.85719	0	-1.28832	3.42097e-114	-1.56887	3.4514e-64
CL2622.Contig18_All	0.68	0.62	0.5	0.8	0.92	0.93	1.39	1.02	1.16	0.43	0.6	1.29	0.377954	9.08264e-05	0.560015	1.2482e-08	0.992368	1.5123e-26	-0.182061	0.00940493	0.432352	1.68033e-07	-0.614413	9.64451e-13
Unigene16530_All	10.97	8.78	8.69	12.07	15.62	13.8	3.23	10.59	8.52	1.51	3.37	2.98	-1.85206	0	0.546105	1.87041e-67	-0.336462	3.93091e-20	-2.39817	0	-0.882567	1.15535e-153	-1.5156	2.96882e-198
CL14209.Contig3_All	10.02	6.48	11.81	4.17	1.59	4.67	7.43	6.62	2.89	14.31	18.8	20.22	0.927628	6.30928e-67	-1.43546	4.5804e-70	-0.723605	5.78699e-24	2.36308	8.5118e-259	0.711851	7.8111e-15	1.65123	1.35854e-161
CL7944.Contig16_All	1.85	0.75	1.02	1.01	1.26	1.48	0.69	0.71	0.91	0.32	0.82	0.33	-1.29473	3.55174e-28	0.0532954	0.148788	-0.644113	6.86924e-10	-1.34803	3.54036e-31	-0.697408	1.89531e-11	-0.650621	3.84237e-07
CL8926.Contig2_All	4.64	9.41	3.09	7.75	15.44	9.27	2.79	7.17	7.97	3.17	2.45	3.61	-0.879252	7.95589e-20	0.924975	1.27083e-38	0.0831359	0.0936026	-1.80423	5.61096e-106	-0.841839	4.98804e-33	-0.962388	7.32087e-24
Unigene46671_All	1.44	2.66	1.42	5.97	3.04	2.46	6.66	4.2	4.81	2.31	4.04	5.64	1.13741	2.54313e-20	1.06212	2.20976e-17	1.52266	3.7458e-39	0.0752969	0.0755568	0.460538	9.82618e-07	-0.385241	2.1335e-05
CL17208.Contig42_All	3.05	3.55	2.72	1.72	1.53	1.85	1.12	1.07	1.63	1.64	4.45	5.02	0.256106	7.47741e-07	-0.871069	1.69614e-40	-1.28607	1.39456e-74	1.12718	2.42e-73	-0.414996	2.08198e-07	1.54217	8.99022e-117
CL4907.Contig3_All	1.39	0.69	0.82	1	1.06	0.81	0.84	1.24	1.31	0.57	1.18	0.8	-0.175556	0.0596301	-0.011844	0.22868	0.240252	0.0263809	-0.163712	0.0445232	0.252096	0.0210211	-0.415809	0.00108862
CL1546.Contig7_All	3.26	1.95	4.09	6.1	3.44	4.05	3.05	4.92	2.36	1.19	2.15	1.44	-0.952033	3.98169e-20	0.550501	4.98898e-12	0.165725	0.0185558	-1.50253	5.02488e-57	-0.384775	4.70593e-07	-1.11776	2.44788e-28
CL16877.Contig13_All	3.66	1.85	2.32	4.47	3.94	2.78	4.96	5.99	6.52	3.09	7.03	9.27	1.32537	2.52201e-40	0.52127	2.78156e-06	1.17554	2.91977e-30	0.804105	4.01728e-19	0.654267	2.29441e-12	0.149838	0.0195027
Unigene6401_All	5.15	9.74	6.29	12.86	9.85	9.31	14.39	8.1	12.01	5.86	11.34	10.18	0.379706	9.16381e-12	0.600699	2.74599e-28	0.711965	2.57455e-40	-0.220993	3.38865e-06	0.111266	0.00731259	-0.33226	1.70079e-11
CL15494.Contig8_All	1.57	3.44	5.63	1.53	1.56	1.36	8.55	12.41	4.67	1.3	5.77	4.41	0.117064	0.0385793	-1.2555	7.22965e-35	1.28247	1.27481e-84	1.37256	1.51767e-43	2.53797	1.94258e-211	-1.16541	2.06704e-73
CL9640.Contig5_All	3.22	2.65	3.01	3.85	3.77	3.58	0.88	3.38	4.12	1.15	1.96	1.55	-0.924623	4.54103e-34	0.33804	1.89114e-08	-0.0721064	0.0832724	-1.26266	1.4395e-69	-0.410146	2.75465e-11	-0.852517	1.99302e-28
Unigene57886_All	0.18	0.69	0.41	1.12	1.72	0.69	1.39	1.43	2.06	0.61	0.54	0.81	0.62189	0.00344622	1.46169	3.60154e-12	1.93269	5.13481e-23	-0.8398	2.41142e-06	0.471003	0.000776423	-1.3108	4.89261e-14
CL4984.Contig8_All	4.33	3.67	6.15	3.89	2.44	3.06	2.61	3.4	2.35	3.88	8.12	8.35	0.5288	6.77646e-27	-0.590846	7.2102e-23	-0.752521	5.71361e-34	1.11965	2.33018e-93	-0.161674	0.00645281	1.28132	2.491e-114
Unigene45663_All	0.37	0.7	0.26	0.8	1.38	1.24	0.29	1.19	0.88	0.31	0.51	0.45	-0.0700033	0.170418	1.36092	3.60466e-17	0.839929	1.18586e-06	-1.43092	8.22157e-19	-0.520986	9.12558e-05	-0.909932	1.87146e-07
CL13767.Contig7_All	1.91	1.6	1.28	1.27	1.07	1.69	0.74	1.11	0.85	0.74	0.96	1.17	-0.72881	2.86146e-22	-0.243696	0.000188275	-0.818037	1.86159e-26	-0.485114	1.98593e-10	-0.574341	5.71616e-13	0.0892271	0.0807838
CL17106.Contig2_All	2.66	2.02	2.14	2.15	2.27	3	0.92	2.02	2.11	0.72	1.32	0.95	-1.18124	2.34615e-26	0.124389	0.0484764	-0.421284	8.62768e-06	-1.30563	2.37681e-33	-0.545673	7.86058e-09	-0.75996	1.38489e-10
Unigene22266_All	0.31	0.21	0.22	0.87	0.64	0.57	0.47	1.11	1.53	0.15	0.46	0.51	0.604255	0.0070252	1.48368	6.44771e-11	2.07793	1.24e-23	-0.879424	4.86668e-06	0.59425	9.40835e-05	-1.47367	1.77781e-15
CL4929.Contig3_All	0.52	0.85	0.53	0.99	0.85	0.89	0.47	0.71	0.69	0.17	0.31	0.26	-1.34824	2.95371e-12	0.529629	7.94814e-05	-0.00796822	0.25125	-1.87787	2.76799e-26	-0.537597	6.88918e-05	-1.34027	4.94222e-12
CL129.Contig3_All	23.67	28.83	24.71	39.12	46.7	35.95	19.4	35.44	32.73	17.23	20.62	21.18	-0.375384	9.17587e-22	0.66195	1.1826e-89	0.198702	1.55617e-08	-1.03733	1.15419e-192	-0.463248	1.18235e-47	-0.574086	2.39733e-51
CL7565.Contig2_All	11.39	8.43	8.21	5.51	7.58	7.7	4.25	5.24	6.11	3	6.32	5.05	-0.962825	0	-0.430692	1.51736e-75	-0.84205	1.29363e-245	-0.532133	2.95686e-83	-0.411357	8.82717e-52	-0.120775	1.91387e-05
CL14295.Contig3_All	3.46	1.55	2.66	3.4	3.65	6.14	1.37	3.69	2.8	0.78	1.43	0.78	-1.35529	3.11842e-35	0.783355	4.62919e-25	0.0483364	0.160943	-2.13865	5.69035e-111	-0.735018	1.63261e-22	-1.40363	4.71433e-38
CL5840.Contig1_All	10.29	8.59	18.38	15.61	10.07	4.48	23.22	9.14	20.13	4.48	12.53	10.3	-0.439288	1.3476e-19	-0.298921	2.22051e-10	0.500532	2.60493e-33	-0.140368	0.00126345	0.799452	4.7035e-74	-0.93982	1.24324e-97
Unigene50324_All	0.24	0.45	0.15	0.8	1.02	0.57	0.4	0.15	0.51	0.28	0.29	0.31	0.0947695	0.191455	1.52342	1.33629e-05	0.358551	0.122668	-1.42865	1.51486e-05	-1.16487	0.000287256	-0.263781	0.137276
CL3889.Contig10_All	1.93	1.81	1.71	2.43	2.18	2.18	2.61	2.31	2.54	1.13	2.34	2.74	0.191452	0.000225475	0.319559	3.43818e-09	0.455943	1.7541e-17	-0.128107	0.00303983	0.136384	0.00272303	-0.264491	1.61435e-07
CL404.Contig7_All	1.22	0.67	0.79	1.36	0.92	0.9	0.87	1.2	0.91	1.1	1.45	2.55	0.942802	8.60368e-13	0.255954	0.0277418	0.168417	0.0826233	0.686849	1.98106e-08	-0.087537	0.14552	0.774386	1.27332e-09
Unigene24602_All	0.96	1.36	1.34	0.94	1.1	0.74	0.76	1.03	1.28	0.94	1.01	1.16	-0.225549	0.0175832	-0.394277	0.000635821	-0.247113	0.0148919	0.168728	0.033113	0.147164	0.0744009	0.021564	0.204639
CL15892.Contig6_All	1.07	0.59	0.91	1.04	0.74	0.7	0.77	0.49	0.82	0.51	0.62	0.36	-0.778086	9.10508e-13	-0.0412251	0.171961	-0.30324	0.00118697	-0.736861	9.5775e-12	-0.262015	0.00388785	-0.474846	1.85332e-05
CL17079.Contig15_All	3.43	2.11	3.1	2.73	2.52	1.76	6.6	3.28	3.97	7.64	14.34	9.77	1.88403	3.68026e-274	-0.299094	5.45873e-05	0.685204	2.22186e-25	2.18312	0	0.984297	1.61129e-45	1.19882	5.12854e-141
Unigene41537_All	1.64	2.07	1.36	1.63	1.8	2.26	0.45	1.53	1.32	0.68	0.88	0.76	-1.12616	4.61938e-48	0.16796	0.00246508	-0.607986	8.58746e-18	-1.29412	9.05409e-67	-0.775946	2.57617e-29	-0.518174	9.20172e-10
Unigene1455_All	0.5	0.21	0.46	0.51	1.03	0.41	0.64	0.51	0.64	0.35	0.63	0.66	0.496496	0.00914775	0.739223	0.000342591	0.625944	0.00221596	-0.242727	0.0392909	-0.11328	0.149278	-0.129448	0.133859
CL9454.Contig4_All	3.23	3.84	4.11	9.89	5.96	6.09	5.47	8.47	7.09	1.69	4.29	2.84	-0.336579	1.1459e-07	0.975922	7.14445e-78	0.920222	6.14462e-68	-1.3125	2.70074e-125	-0.0556997	0.0616053	-1.2568	3.69073e-112
CL10015.Contig4_All	2.77	2.58	3.55	3.67	6.49	5.89	2.01	2.74	3.93	0.86	1.94	1.34	-1.09755	1.15884e-45	0.850293	4.30105e-53	-0.0292244	0.179416	-1.94784	3.49991e-187	-0.879517	7.93375e-56	-1.06832	9.91064e-43
CL1736.Contig82_All	82.91	48.15	105.01	22.17	9.17	10.37	8.16	12.76	12.8	84.21	144.59	127.27	0.597774	0	-2.49622	0	-2.79857	0	3.09399	0	-0.30235	5.88507e-20	3.39634	0
CL7001.Contig5_All	1.51	1.56	1.18	2.66	2.67	2.27	2.47	2.21	2.41	1.05	1.73	1.91	0.148576	0.0201961	0.840158	3.18273e-30	0.741797	3.72323e-23	-0.691582	1.47027e-22	-0.0983605	0.0392183	-0.593221	2.55743e-16
CL4314.Contig15_All	3.22	2.82	1.64	1.71	1.84	2.22	0.75	1.6	1.18	0.47	0.66	0.56	-2.18334	2.1716e-160	-0.411474	3.44806e-12	-1.11332	5.53835e-61	-1.77187	1.17426e-92	-0.701841	3.47974e-22	-1.07003	1.17552e-27
Unigene13609_All	2.14	3.06	1.23	0.82	1.07	1.06	0.25	0.61	0.67	1.12	1.34	0.53	-1.10024	3.10949e-12	-1.12307	1.90338e-12	-2.05123	2.19385e-27	0.02283	0.139528	-0.928159	2.5079e-05	0.950989	1.31041e-05
CL2534.Contig6_All	1.7	1.22	1.42	1.24	2.49	2.67	0.68	1.08	1.36	0.24	0.64	0.63	-1.51556	7.24211e-33	0.561885	1.57219e-10	-0.468414	5.35578e-06	-2.07744	8.35015e-73	-1.0303	1.56404e-26	-1.04715	2.12486e-14
CL13202.Contig1_All	1.62	1.01	2.04	1.61	1.41	1.91	1.08	2.26	2.15	1.02	1.11	1.19	-0.494381	1.50459e-13	0.0752405	0.0639937	0.239544	2.91305e-05	-0.569622	5.04516e-18	0.164304	0.00203829	-0.733926	1.32582e-29
CL681.Contig20_All	0.07	0.11	0.18	0.48	0.25	0.26	0.15	0.25	0.4	0.4	0.35	0.26	1.48873	1.79032e-11	1.46504	5.71717e-11	1.16916	4.97582e-07	0.0236896	0.137458	-0.295881	0.0337693	0.31957	0.0239536
CL13382.Contig2_All	0.66	0.45	0.51	0.84	0.69	1.07	0.91	0.73	0.91	0.4	0.49	0.83	0.098869	0.118591	0.690062	4.76806e-08	0.65523	2.5144e-07	-0.591193	7.47e-07	-0.0348326	0.192037	-0.556361	5.49073e-06
CL2616.Contig19_All	0.46	0.69	0.83	0.19	0.51	0.55	0.2	0.16	0.46	0.6	0.39	0.44	-0.467627	0.00016113	-0.669424	6.50513e-07	-1.27424	9.37306e-17	0.201797	0.0305143	-0.60482	0.000197834	0.806617	5.74053e-07
CL12037.Contig3_All	0.42	0.13	0.33	0.24	0.75	0.68	0.29	0.47	0.47	0.02	0.09	0.09	-2.06853	5.54624e-07	0.946948	8.3319e-05	0.505614	0.0222233	-3.01547	3.19776e-17	-0.441334	0.0188029	-2.57414	2.97398e-11
CL5826.Contig21_All	1.63	1.7	1.6	1.4	1.44	1.63	1.24	1.92	1.96	1.68	3.13	2.91	0.64905	6.26985e-26	-0.142325	0.0147293	0.0599895	0.11248	0.791375	3.73637e-36	0.202314	0.00156578	0.58906	5.45363e-22
CL13901.Contig1_All	0.42	0.36	0.16	0.56	0.86	0.35	1.05	0.58	0.54	0.34	0.89	1.03	1.29129	5.22898e-06	0.921809	0.00136362	1.22203	2.32126e-05	0.369483	0.0249729	0.300221	0.0697927	0.069262	0.185197
CL3295.Contig2_All	5.46	5.31	8.35	2.47	4.77	4.03	9.54	6.78	10.64	2.32	2.65	1.86	-1.47282	1.10071e-50	-0.757888	2.65805e-18	0.509531	2.46863e-13	-0.714935	5.44925e-11	1.26742	2.07952e-56	-1.98235	7.42511e-107
Unigene38667_All	0.51	1.02	0.48	0.55	0.75	0.4	0.67	0.85	0.51	0.27	0.7	0.84	-0.131535	0.153425	-0.243903	0.112643	0.0401409	0.234679	0.112368	0.111922	0.284044	0.094359	-0.171676	0.13852
CL5832.Contig2_All	1.4	1.34	2.08	2.56	1.59	1.8	0.73	1.17	1.02	0.95	1.59	1.08	-0.408644	0.000138977	0.305194	0.00106306	-0.709931	3.27345e-09	-0.713838	1.84516e-11	-1.01513	1.32184e-18	0.301287	0.00661315
Unigene29295_All	42.08	18.6	41.64	17.39	26.48	28.17	10.39	19.86	21.33	17.12	29.2	25.03	-0.510807	8.77706e-65	-0.503387	1.09655e-62	-0.974266	5.41196e-195	-0.0074194	0.127397	-0.470879	1.27806e-39	0.463459	1.18854e-38
CL11956.Contig2_All	0.57	0.64	0.82	1.27	2.13	1.81	0.87	1.82	1.34	0.42	0.32	0.11	-1.25457	2.40021e-09	1.36443	1.57481e-23	1.00165	4.19702e-12	-2.619	3.3394e-54	-0.362779	0.000649656	-2.25622	8.83945e-36
CL14927.Contig22_All	2.82	1.79	1.73	3.65	1.25	3.62	4.83	4.59	6.4	1.39	1.95	4.08	0.234513	9.93656e-05	0.430701	3.33227e-12	1.3249	5.13045e-135	-0.196188	0.000222267	0.894204	4.41904e-72	-1.09039	3.58275e-100
Unigene15587_All	0.37	0.41	0.51	0.83	0.55	0.3	0.51	0.82	0.67	0.16	0.32	0.33	-0.665453	4.14088e-06	0.389274	0.000780012	0.638743	6.8866e-08	-1.05473	2.37098e-14	0.249469	0.00925051	-1.3042	4.12894e-22
Unigene65193_All	0.52	0.27	0.29	0.29	0.89	0.69	0.15	0.35	0.49	0.2	0.09	0.21	-1.09055	0.00161681	0.796096	0.00171413	-0.106487	0.201775	-1.88664	6.66635e-09	-0.902583	0.000652963	-0.984061	0.00423724
CL16283.Contig18_All	2.52	2.07	1.97	2.36	2.2	2.7	0.77	2.17	2.31	1.15	2.31	1.64	-0.354806	8.84645e-05	0.150151	0.028117	-0.308572	0.000564758	-0.504957	2.19079e-08	-0.458723	5.25775e-07	-0.0462347	0.159305
CL1928.Contig3_All	2.78	2.34	1.94	2.77	4.07	3.93	2	2.67	3	1.44	2.55	2.21	-0.183801	0.000552028	0.611511	3.33474e-33	0.126437	0.00819989	-0.795311	2.93227e-52	-0.485074	2.36789e-22	-0.310238	2.75547e-08
Unigene41508_All	6.81	12.17	8.79	19.28	14.05	9.57	14.43	17.44	15.06	6.37	12.24	11.74	0.137704	0.00200332	0.632263	2.56935e-42	0.769429	1.6878e-64	-0.494559	2.4862e-28	0.137166	0.000305961	-0.631725	2.11838e-46
CL1338.Contig12_All	34.31	22.19	35.29	16.57	16.06	25.08	8.26	28.56	19.62	12.9	19.07	13.63	-1.0039	2.38555e-275	-0.667245	9.65479e-137	-0.687055	1.91884e-143	-0.336653	1.3896e-26	-0.0198094	0.136549	-0.316844	2.95239e-23
CL4509.Contig2_All	1.86	1.42	1.55	2.56	2.74	2.67	1.95	1.61	1.66	0.65	1.71	1.75	-0.226746	0.00676925	0.72704	6.19753e-18	0.120758	0.0621591	-0.953786	6.23176e-28	-0.606282	1.93047e-13	-0.347503	0.000141842
CL12356.Contig2_All	13.04	9.13	7.86	9.09	14.46	13.26	3.43	7.7	8.62	2.54	4.16	3.98	-1.486	8.35451e-200	0.295318	2.96229e-16	-0.593719	1.81662e-44	-1.78132	0	-0.889037	1.59019e-107	-0.892278	1.10387e-59
CL2526.Contig19_All	1.25	2.24	1.67	4.52	2.18	2.53	4.76	5.34	5.54	2.43	4.5	3.77	1.06085	1.39579e-23	0.844511	1.66054e-14	1.61251	7.80683e-62	0.216343	0.00356717	0.767994	4.79709e-20	-0.551651	4.38147e-12
CL3007.Contig8_All	1.04	0.58	0.81	0.7	0.99	1.02	0.19	0.41	0.62	0.15	0.17	0.23	-2.13059	1.07629e-52	0.153674	0.0315592	-0.982888	8.77353e-18	-2.28427	9.5566e-64	-1.13656	2.82473e-24	-1.14771	2.49232e-12
CL14040.Contig1_All	6.7	2.8	7.44	2.58	2.81	2.81	1.69	3.57	2.84	3.3	11.38	7.88	0.418969	1.59892e-15	-1.04467	2.04685e-52	-1.05354	5.87025e-53	1.46364	1.14371e-117	-0.00886792	0.224565	1.47251	6.04911e-118
CL2924.Contig13_All	34.5	33	34.87	49.69	47.4	36.53	37.07	53.78	49.99	28.68	40.64	41.07	0.121632	5.01535e-05	0.389756	2.15134e-37	0.477284	1.29271e-56	-0.268124	7.6151e-20	0.0875287	0.000736683	-0.355653	9.05805e-34
CL7156.Contig2_All	5.76	4.32	5.58	5.27	5.36	6.89	4.04	6.1	7.83	1.65	2.95	3.41	-0.961897	7.08049e-89	0.164078	1.6169e-05	0.205025	1.12222e-07	-1.12598	2.55364e-128	0.0409472	0.0811067	-1.16692	9.25535e-139
CL4934.Contig2_All	1.29	1.21	0.57	1.86	1.91	2.45	0.35	1.05	1.45	0.24	0.46	0.36	-1.51509	8.57629e-57	1.02199	1.236e-61	-0.0988421	0.0587175	-2.53708	1.63245e-221	-1.12084	5.76836e-71	-1.41625	5.11523e-48
CL17032.Contig4_All	1.49	2.5	1.11	1.97	0.49	1.96	1.05	2.04	1.2	0.62	0.91	0.72	-1.17347	2.43575e-30	-0.201779	0.00702788	-0.235031	0.00283116	-0.971692	2.35899e-20	-0.0332519	0.18149	-0.938441	1.42205e-18
CL13320.Contig7_All	31.9	21.1	13.33	12.55	23.05	20.75	28.97	25.33	17.63	11.3	4.53	9.38	-1.39034	0	-0.23463	6.42427e-33	0.121735	2.8854e-11	-1.15571	0	0.356365	3.31308e-76	-1.51208	0
Unigene40933_All	3.43	3.43	1.87	5.45	8.11	6.69	4.08	6.12	5.63	0	0	0	-10.8023	1.35754e-129	1.21503	3.08545e-105	0.866545	2.74229e-48	-12.0173	5.67708e-243	-0.348486	2.88721e-13	-11.6688	2.54489e-202
CL8704.Contig2_All	2.38	1.87	1.95	3.48	3.45	3.44	1.17	2.65	2.58	0.49	1.41	0.88	-1.15226	2.30359e-32	0.742984	4.13012e-26	0.0551128	0.139594	-1.89524	1.08892e-108	-0.687871	6.29056e-23	-1.20737	8.47171e-36
Unigene18657_All	0.97	0.84	0.61	0.53	0.72	1.1	0.37	0.65	1.05	0.13	0.26	0.29	-1.81684	2.85362e-18	-0.0403386	0.198554	-0.215145	0.0558262	-1.7765	1.37367e-17	-0.174807	0.0787065	-1.60169	1.24638e-13
CL10292.Contig6_All	1.27	1.86	0.87	3.37	1.2	1.62	3.69	2.8	2.94	1.05	1.49	1.98	0.184881	0.0097833	0.632791	3.08578e-15	1.24093	3.61205e-65	-0.44791	2.49752e-09	0.608135	9.56241e-21	-1.05604	5.10955e-51
Unigene46316_All	1.26	1.9	1.15	2.75	2.76	1.34	6.47	2.84	3.95	2.6	3.44	3.81	1.19823	1.53433e-42	0.670427	2.22819e-12	1.62259	2.42507e-87	0.527804	4.19738e-12	0.952159	6.77767e-39	-0.424355	8.64441e-11
Unigene65325_All	1.42	2.74	1.54	2.84	3.87	3.46	1.89	3.32	3.11	0.63	1.77	1.85	-0.417938	4.89631e-06	0.834775	2.41683e-27	0.555421	4.78815e-12	-1.25271	3.70534e-52	-0.279355	3.12146e-05	-0.973359	3.71066e-29
Unigene1948_All	0.38	0.45	0.21	0.42	0.79	0.83	0.64	0.46	0.34	0.23	0.08	0.31	-0.721518	0.0085166	0.972511	3.61368e-05	0.48488	0.0240752	-1.69403	3.64176e-10	-0.487631	0.0107569	-1.2064	2.96645e-05
CL16996.Contig6_All	1.24	0.81	0.84	0.6	0.94	1.26	0.18	0.3	0.48	0.24	0.22	0.42	-1.71906	8.05726e-23	-0.0469763	0.182804	-1.57932	3.52752e-20	-1.67208	1.2369e-21	-1.53234	8.60276e-19	-0.139738	0.136825
CL6356.Contig2_All	3.05	2.61	2.41	3.67	3.39	3.17	1.18	2.87	3.35	0.94	1.43	1.09	-1.21263	1.84416e-44	0.346107	9.65277e-08	-0.113661	0.0372303	-1.55874	2.00808e-81	-0.459768	8.095e-12	-1.09897	2.48571e-35
Unigene60612_All	0.75	0.53	0.71	1.2	0.84	0.77	0.65	1.08	1.02	0.39	0.77	0.58	-0.18845	0.0254217	0.501573	2.50507e-07	0.478786	9.30512e-07	-0.690023	5.66366e-12	-0.0227876	0.200958	-0.667235	5.92911e-11
CL1864.Contig28_All	3.54	2.55	3.73	3.54	3.52	1.05	1.18	3.31	1.91	1.2	1.26	0.55	-1.70383	6.67795e-88	-0.274104	1.9742e-05	-0.604569	1.50983e-17	-1.42972	2.97375e-57	-0.330466	4.62795e-06	-1.09926	8.54809e-31
CL7009.Contig3_All	1.22	2.24	0.88	2.07	2.77	2.46	1.07	1.9	2.49	0.81	1.53	1.67	-0.106454	0.0929533	0.753477	2.06274e-13	0.343443	0.000822349	-0.859931	8.82901e-17	-0.410034	1.24247e-05	-0.449897	2.75425e-05
CL8042.Contig2_All	2.83	2.77	2.25	2.52	3.48	3.56	1.27	2.29	2.58	1.09	1.99	1.9	-0.651081	5.37246e-24	0.286191	1.08134e-07	-0.347534	9.72782e-09	-0.937272	1.11558e-52	-0.633725	3.39963e-27	-0.303547	4.40185e-06
CL822.Contig40_All	0.35	0.21	0.25	0.18	0.23	0.38	0.14	0.33	0.21	0.22	0.46	0.24	0.186144	0.0656836	-0.0331875	0.20969	-0.251007	0.0500433	0.219332	0.0314477	-0.21782	0.0645378	0.437151	0.00354203
Unigene35381_All	2.26	1.98	1.88	2.04	3.32	2.05	2.13	3.37	2.91	1.03	1.9	0.76	-0.722494	6.23346e-10	0.276908	0.00214103	0.471033	6.56091e-07	-0.999402	4.43734e-19	0.194125	0.0120652	-1.19353	1.504e-27
Unigene57980_All	0.45	0.14	0.42	0.86	0.45	0.28	0.97	0.85	0.48	0.38	0.54	0.5	0.520638	0.0357031	0.667839	0.0156444	1.22023	3.45648e-05	-0.147201	0.100519	0.552396	0.0144716	-0.699597	0.00414361
CL4078.Contig11_All	1.73	3.44	2.53	7.87	4.94	4.07	6.51	5.71	5.36	1.6	3.97	4.7	0.42435	1.5609e-06	1.13611	2.88655e-44	1.20026	4.22528e-50	-0.711758	1.33879e-21	0.0641509	0.0925784	-0.775909	2.24443e-25
Unigene53768_All	7.77	9.17	6.97	9.88	11.38	11.35	9.28	9.07	10.65	5.74	11.41	10.05	0.195564	0.000150911	0.451051	1.67636e-17	0.289564	6.86533e-08	-0.255487	1.61399e-07	-0.161487	0.000579066	-0.0940002	0.0220188
CL8887.Contig11_All	2.41	2.06	1.86	2.15	1.96	2.43	0.39	1.75	1.67	0.62	1.48	1.2	-0.933387	2.08881e-30	0.0484007	0.129218	-0.720499	6.05724e-20	-0.981787	3.09144e-34	-0.768899	9.20812e-23	-0.212888	0.00681101
CL8976.Contig2_All	2.17	1.63	1.51	0.64	0.52	0.34	0.24	0.58	0.71	0.53	0.81	1.1	-1.11149	8.40521e-20	-1.82216	3.74386e-39	-1.78257	6.2991e-38	0.710669	5.71287e-06	0.0395903	0.207452	0.671079	2.47751e-05
Unigene56795_All	0.74	0.51	0.81	1.04	0.65	0.81	0.33	1.35	1.42	0.33	0.75	0.98	0.0102516	0.213335	0.277621	0.017873	0.601002	6.04985e-06	-0.267369	0.0115948	0.323381	0.00484984	-0.590751	6.7456e-06
CL16863.Contig6_All	7.04	9.55	5.54	8.43	16.01	12.64	1.61	7.24	6.13	3.18	4.46	4.43	-0.862109	2.89968e-27	0.74807	5.72325e-35	-0.543782	5.48406e-13	-1.61018	1.09074e-116	-1.29185	3.21235e-83	-0.318327	0.000114231
Unigene14497_All	8.89	9.78	4.44	12.48	21.13	11.22	2.78	12.28	10.71	2.05	2.74	2.37	-1.68615	2.07818e-153	0.957348	3.31639e-123	0.170641	0.00010939	-2.6435	0	-0.786708	2.65635e-88	-1.85679	4.83994e-196
CL1816.Contig2_All	5.38	5.89	5.7	11.03	13.03	7.58	9.99	7.16	8.58	3.24	6.26	7.83	0.0457262	0.134875	0.904543	8.13206e-40	0.614713	1.176e-17	-0.858817	3.46833e-37	-0.28983	1.30839e-06	-0.568987	9.93562e-16
CL2280.Contig19_All	2.17	2.35	2.01	1.57	2.33	1.59	0.83	1.21	0.85	2.36	2.97	5.65	0.755859	1.30083e-34	-0.249272	0.0002884	-1.1674	1.66386e-41	1.00513	3.34674e-55	-0.918127	2.66175e-24	1.92326	1.61619e-142
CL1515.Contig1_All	5.2	7.26	7.88	11.36	10.71	7.49	11.09	13.95	10.87	4.22	9.29	10.38	0.245313	7.42931e-05	0.544333	3.48553e-18	0.835799	2.73285e-44	-0.29902	1.64226e-07	0.291467	4.79136e-08	-0.590486	4.45192e-25
CL15247.Contig2_All	1.25	0.79	0.41	0.63	1.54	1.47	0.39	0.8	0.75	0.18	0.29	0.23	-1.81086	1.04102e-50	0.570764	7.4958e-13	-0.326664	0.00021942	-2.38162	4.94653e-105	-0.897428	5.37554e-26	-1.4842	4.93949e-31
Unigene5072_All	3.2	3.29	1.53	6.84	8.97	9.31	2.19	4.78	5.37	0.23	0.75	0.92	-2.06344	2.16458e-88	1.64796	1.8343e-200	0.631438	2.89386e-22	-3.7114	0	-1.01653	2.45898e-95	-2.69488	8.32131e-185
CL5588.Contig4_All	8.09	8.38	9.41	10.61	7.48	8.84	22.56	10.89	10.74	10.34	15.61	16.14	0.711262	4.85848e-48	0.0613768	0.0749993	0.779911	4.17358e-58	0.649885	1.57405e-41	0.718534	1.6334e-50	-0.068649	0.0310195
CL3376.Contig5_All	0.36	0.28	0.27	0.36	0.24	0.33	0.17	0.23	0.11	0.12	0.05	0.14	-1.5615	1.80385e-08	0.028899	0.220031	-0.807503	0.000530646	-1.5904	5.12744e-09	-0.836402	0.000328505	-0.753997	0.00674871
Unigene65355_All	0.59	1.07	0.76	0.8	0.82	0.72	0.95	0.57	0.98	0.54	0.76	0.91	-0.123676	0.0984234	-0.0445636	0.190722	0.0485195	0.198684	-0.0791122	0.0942626	0.0930831	0.137596	-0.172195	0.0637951
CL8970.Contig1_All	3.37	6.55	3.76	6.27	7.8	5.61	10.06	6.86	10.74	3.79	7.54	9.95	0.650551	1.23124e-17	0.528209	1.03068e-11	1.02715	4.93487e-46	0.122343	0.0143153	0.498942	2.42722e-14	-0.376599	2.31837e-09
CL11118.Contig1_All	6.91	10.14	5.85	16.92	16.45	11.13	15.52	13.66	10.7	3.53	4.38	6.9	-0.620688	3.56529e-28	0.961679	3.18172e-110	0.8086	2.942e-74	-1.58237	3.09222e-240	-0.153079	2.08531e-05	-1.42929	2.3298e-185
CL1742.Contig3_All	0.23	0.29	0.24	0.67	0.72	0.69	0.31	0.44	0.72	0.64	0.62	0.55	1.27392	2.90841e-09	1.4772	2.12117e-12	0.982848	1.04973e-05	-0.203278	0.0392265	-0.494355	0.00217612	0.291077	0.0330498
CL691.Contig32_All	0.32	0.28	0.32	0.42	0.23	0.3	0.3	0.58	0.43	0.44	0.3	0.45	0.373718	0.0168174	0.0498093	0.202591	0.527725	0.0025401	0.323908	0.0176281	0.477916	0.00466354	-0.154008	0.102496
CL8298.Contig1_All	13.8	15.41	12.59	18.63	18.14	16.13	14.93	15	13.98	5.48	14.05	11.95	-0.396475	3.50373e-14	0.344308	9.9563e-14	0.0857273	0.0264221	-0.740783	2.16271e-50	-0.258581	1.0829e-08	-0.482202	1.72607e-20
Unigene13110_All	441.35	591	515.66	491.46	452.75	433.46	836.45	659.89	632.33	676.37	1012.44	929.79	0.769368	0	-0.163663	7.73288e-91	0.472392	0	0.93303	0	0.636055	0	0.296976	0
Unigene23342_All	2.25	3.19	4.14	0.83	1.48	1.93	0.42	0.37	0.55	2.13	4.13	2.15	-0.186875	0.00143388	-1.17675	3.11477e-51	-2.83562	7.7192e-163	0.989871	3.70429e-35	-1.65888	2.21565e-38	2.64875	3.70672e-134
CL3519.Contig4_All	26.09	18.82	22.22	30.82	26.04	13.54	17.74	24.36	23.93	7.49	17.44	8.77	-0.984326	2.66281e-102	0.0744258	0.0166191	-0.00802032	0.22269	-1.05875	2.33611e-121	-0.0824461	0.0106396	-0.976306	5.86255e-100
CL9121.Contig2_All	1.93	0.71	2.09	2.22	1.08	2.17	1	2	2.71	0.25	0.78	0.41	-1.71863	2.69872e-41	0.213738	0.00679747	0.281007	0.000805171	-1.93237	8.61715e-56	0.0672693	0.119612	-1.99964	2.24685e-60
Unigene61639_All	0.37	0.67	0.37	0.45	0.48	0.32	0.42	0.59	0.59	0.46	0.56	0.51	0.124478	0.140603	-0.171742	0.129248	0.188059	0.120792	0.29622	0.0367033	0.359801	0.0394558	-0.0635814	0.186204
CL10621.Contig2_All	7.91	6.74	6.25	9.07	10.15	10.76	3.25	6.58	7.44	2.86	5.53	4.21	-0.724748	1.53389e-49	0.522104	1.09155e-39	-0.26552	3.00385e-09	-1.24685	4.22495e-171	-0.787624	5.64018e-80	-0.459227	2.90513e-19
CL1847.Contig13_All	2.66	1.9	1.2	0.79	1.94	1.94	0.38	1.06	1.04	0.52	0.69	0.42	-1.8101	1.80797e-29	-0.299918	0.00550066	-1.19848	1.25226e-16	-1.51018	1.82678e-19	-0.898559	2.62778e-09	-0.61162	0.00073322
Unigene18482_All	6.33	6.56	5.28	14.22	13.91	8.98	11.48	10.47	11.54	4.1	5.68	7.4	-0.0650458	0.106359	1.03631	2.96354e-51	0.898276	3.99086e-37	-1.10136	4.32212e-57	-0.138038	0.00669684	-0.963322	9.50102e-42
CL12059.Contig31_All	0.12	0.21	0.19	0.17	0.06	0.18	0.02	0.08	0.09	0.07	0.08	0.08	-1.13994	8.42116e-05	-0.338392	0.0610872	-1.41751	6.72274e-06	-0.801549	0.00282592	-1.07912	0.000718218	0.277567	0.122814
CL10982.Contig2_All	1.77	1.08	1.52	1.47	1.36	2.05	0.69	1.57	1.31	0.74	1.42	1.31	-0.32805	2.08211e-05	0.162212	0.0100907	-0.284005	0.00019797	-0.490262	1.57185e-10	-0.446217	8.44575e-09	-0.0440443	0.149751
Unigene87113_All	1.91	6.73	5.51	8.17	6.41	4.31	9.24	7.05	9.47	8.46	10.53	14.17	1.23396	5.9245e-173	0.419122	1.21692e-16	0.868021	1.07683e-75	0.814836	2.14164e-88	0.448899	1.23163e-24	0.365937	3.98782e-22
CL17125.Contig11_All	2.11	2.73	2.85	3.21	2.12	1.95	2.67	3.81	2.64	0.88	2.03	1.39	-0.835199	2.18656e-18	-0.0741854	0.104303	0.258091	0.000513692	-0.761014	1.71776e-15	0.332276	1.8498e-05	-1.09329	1.38039e-32
Unigene34359_All	0	0	0	0.6	0.24	0.7	0	0	0	0	0	0			8.11871	2.11786e-30			-8.1324	6.96362e-31	-8.10658	2.8257e-30
CL10011.Contig5_All	5.54	4.49	4.91	5.31	3.21	4.44	6.26	5.72	5.32	4.9	8.07	9.11	0.572776	1.28902e-21	-0.201213	0.00135403	0.220971	0.00025427	0.773989	1.02536e-35	0.422185	1.44712e-10	0.351804	7.26496e-10
CL4754.Contig3_All	15.78	13.62	14.1	24.82	23.18	19.76	10.95	16.52	15.29	4.01	12.77	8.08	-0.801061	1.97414e-75	0.642701	1.96251e-79	-0.0131826	0.197866	-1.44376	1.06132e-300	-0.655884	7.51473e-82	-0.787879	2.24157e-72
Unigene15036_All	0.62	0.24	0.45	0.68	0.81	1.07	0.59	0.81	0.74	0.14	0.27	0.08	-1.39042	6.55145e-07	0.975122	2.10481e-07	0.724073	0.000143814	-2.36554	1.37914e-22	-0.251049	0.0423707	-2.11449	9.02733e-17
CL10476.Contig2_All	82.53	136.67	73.01	178.58	117.71	117.47	184.87	210.11	213.03	67.08	110.53	188.47	0.342091	2.00296e-73	0.507562	1.10626e-167	1.07384	0	-0.165472	3.80623e-22	0.566273	4.4594e-300	-0.731745	0
Unigene38807_All	5.03	4.58	8.3	9.59	5.23	5.43	5.44	6.86	7.26	6.25	6.57	5.99	0.0792979	0.0549467	0.182454	0.00132059	0.138658	0.00992078	-0.103156	0.0164883	-0.0437953	0.12724	-0.0593603	0.0887129
CL9941.Contig6_All	2.56	0.97	1.97	1.66	1.53	2.46	2.54	1.06	1.32	1.06	2.03	2.05	-0.0948592	0.0510529	0.040173	0.150257	-0.162377	0.010327	-0.135032	0.0114084	-0.20255	0.00228354	0.0675174	0.0964868
CL6163.Contig2_All	22.4	18.73	7.86	9.03	28.26	17.88	18.72	24.69	15.44	18.37	8.83	12.19	-0.304618	4.36982e-10	0.17428	6.26891e-05	0.281968	2.4847e-10	-0.478897	1.18254e-23	0.107688	0.00494348	-0.586586	3.68459e-35
CL6586.Contig2_All	2.63	2.95	2.08	4.62	3.14	4.01	2.25	3.66	3.53	0.92	1.76	1.69	-0.797737	4.40504e-10	0.624956	5.27549e-10	0.31922	0.0012301	-1.42269	1.82123e-34	-0.305735	0.00063008	-1.11696	1.03788e-19
CL9825.Contig2_All	73.37	51.22	107.53	83.83	29.64	48.57	162.8	146.08	137.6	182.01	413.68	302.06	1.95709	0	-0.51375	8.92471e-212	0.95133	0	2.47084	0	1.46508	0	1.00576	0
CL9057.Contig2_All	9.37	7.1	7.1	4.24	8.29	8.58	3.65	5.79	5.24	1.8	4.36	2.9	-1.37512	1.62302e-127	-0.158443	0.000266865	-0.672561	8.1222e-40	-1.21668	3.04486e-95	-0.514118	8.31646e-23	-0.702563	9.46583e-28
CL9325.Contig4_All	10.11	4.46	6.24	4.93	9.74	8.99	1.71	5.14	4.2	1.53	2.25	1.38	-2.0089	3.26363e-280	0.186404	6.46705e-07	-0.901394	2.76037e-83	-2.1953	0	-1.0878	3.75698e-128	-1.10751	1.85578e-63
CL1903.Contig14_All	0.24	0.17	0.18	0.17	0.49	0.3	0.25	0.23	0.37	0.49	0.2	0.35	0.823986	1.03348e-05	0.707446	0.000174534	0.536851	0.00360438	0.116539	0.081141	-0.170595	0.097423	0.287134	0.0310648
Unigene61145_All	2.93	2.76	1.38	6.09	3.68	3.34	1.31	3.94	3.06	1.16	2.02	1.22	-0.68294	1.52984e-17	0.895277	6.54259e-48	0.24551	0.000162862	-1.57822	7.44887e-116	-0.649767	3.98798e-28	-0.92845	3.65807e-33
CL815.Contig19_All	29.24	15.73	42.44	5.71	4.66	7.34	4.48	15.04	11.01	13.7	17.67	18.08	-0.811671	9.62571e-117	-2.29872	0	-1.49969	0	1.48705	5.99236e-176	0.799032	6.52238e-41	0.688017	9.90278e-51
CL16298.Contig5_All	1.08	2.13	0.97	1.66	1.91	1.38	0.99	2.66	2.11	1.07	0.67	0.81	-0.704605	1.5187e-06	0.248225	0.0176413	0.479448	5.38555e-05	-0.952829	1.87462e-11	0.231223	0.0169888	-1.18405	2.18839e-17
CL6790.Contig3_All	16.57	18.24	14.28	23.7	24.65	18.42	15.78	18.63	18.18	9.82	12.27	15.51	-0.379405	2.52952e-38	0.445928	2.30821e-68	0.106399	3.9578e-05	-0.825334	3.17575e-203	-0.339529	1.22675e-41	-0.485804	1.58743e-63
CL2789.Contig1_All	1.25	1.62	1.13	2.59	2.18	2.32	1.95	2.4	1.86	1.17	2.32	1.51	0.330803	0.0038609	0.828947	6.33502e-12	0.647432	1.46454e-07	-0.498144	3.40182e-06	-0.181514	0.0297999	-0.316629	0.00254655
CL6572.Contig45_All	12.21	10.73	11.93	19.05	12.79	15.1	23.77	19.42	24.39	5.81	15.99	9.75	-0.137042	0.00107976	0.432777	1.33878e-24	0.963481	5.71492e-137	-0.569819	5.00183e-40	0.530704	2.43492e-49	-1.10052	7.49755e-171
Unigene32797_All	1.98	2.98	1.69	3.25	2.78	3.37	2.87	2.77	3.11	0.73	2.25	1.58	-0.542446	5.50536e-15	0.499517	1.19848e-17	0.397092	1.96251e-11	-1.04196	1.82293e-59	-0.102426	0.0197754	-0.939538	1.24267e-46
CL12142.Contig19_All	28.48	32.02	39.23	38.06	26.45	31.42	44.26	36.7	39.12	7.4	15.36	7.73	-1.70365	0	-0.0523291	0.0148985	0.276715	6.08729e-29	-1.65132	0	0.329045	2.21841e-39	-1.98036	0
CL11201.Contig35_All	0.59	0.42	0.45	0.49	0.75	0.72	0.45	0.54	0.59	0.42	0.88	0.88	0.577166	6.46514e-08	0.429113	6.2319e-05	0.124534	0.0894457	0.148053	0.0254251	-0.304579	0.00221767	0.452632	1.08316e-05
CL13958.Contig2_All	0.13	0.33	0.18	0.42	0.89	0.33	0.97	0.56	1	0.18	0.38	0.37	0.527895	0.0356985	1.33501	5.99743e-06	1.96748	5.38235e-13	-0.807119	0.000772863	0.632466	0.00142805	-1.43959	4.34861e-09
Unigene46678_All	3.57	1.36	2.61	1.66	3.76	3.41	0.7	1.94	1.81	0.88	1.79	1.11	-0.989807	2.67255e-17	0.23271	0.00521664	-0.743614	3.43165e-11	-1.22252	1.31165e-27	-0.976324	2.68018e-19	-0.246193	0.0196564
CL14560.Contig35_All	4.65	4.25	4.05	7.97	6.28	4.1	4.8	4.85	7.01	0.96	3.22	3.08	-0.819277	1.94261e-15	0.510478	4.14441e-10	0.378291	4.11535e-06	-1.32975	1.14696e-44	-0.132187	0.0277817	-1.19757	1.19076e-34
CL6355.Contig1_All	0.59	0.49	0.74	1.59	2.15	2.07	3.1	4.14	2.44	0.61	1.26	1.26	0.794962	0.000117126	1.67881	8.26786e-19	2.42736	1.25056e-47	-0.883848	2.36718e-08	0.748549	1.31083e-09	-1.6324	2.64127e-29
CL16862.Contig20_All	5.35	2.24	8.89	3.61	1.82	2.81	1.36	3.39	3.93	3.86	6.08	6.02	-0.041309	0.0901778	-0.995748	5.31151e-77	-0.917532	3.3398e-67	0.954439	1.14677e-70	0.0782157	0.0621981	0.876223	6.2962e-61
CL10027.Contig3_All	1.29	0.86	1.14	1.82	1.91	2.14	0.84	1.82	0.92	0.55	0.93	0.84	-0.502238	1.54095e-07	0.834884	1.67994e-26	0.132633	0.0434177	-1.33712	1.23219e-55	-0.702252	5.19768e-20	-0.63487	2.69662e-11
Unigene61963_All	0.9	1.27	0.85	2.29	1.83	1.24	1.87	1.47	1.98	0.49	0.68	0.83	-0.571782	0.00405725	0.83506	1.95265e-06	0.833085	2.24928e-06	-1.40684	5.50162e-13	-0.0019753	0.239876	-1.40487	1.24876e-12
CL6534.Contig5_All	0.24	0.9	0.53	0.56	0.65	0.33	1.24	0.85	0.9	0.15	0.28	0.28	-1.2119	5.1727e-08	-0.101859	0.153772	0.852194	6.12524e-08	-1.11004	4.64753e-07	0.954052	3.14572e-09	-2.06409	1.25518e-25
CL6359.Contig2_All	9.45	8.69	7.8	9.38	10.85	8.75	8.02	10.71	10.76	3.96	6.83	7.05	-0.536114	5.22798e-46	0.16158	6.83899e-07	0.191928	5.00973e-09	-0.697695	3.79559e-81	0.0303477	0.0969	-0.728042	2.07801e-88
Unigene4568_All	0.81	0.53	1.63	2.63	2.99	0.72	4.87	1.5	3.22	3.72	5.52	3.46	2.09736	1.32444e-211	1.09609	4.64785e-42	1.68884	9.37056e-119	1.00127	5.02546e-72	0.592743	7.47959e-23	0.408525	4.07433e-16
CL11611.Contig3_All	3.26	5.47	3.85	5.47	6.2	5.95	1.83	4.2	4.91	1.86	3.92	3.21	-0.476782	1.01734e-10	0.489144	1.00083e-14	-0.189809	0.00309221	-0.965926	5.35609e-45	-0.678953	6.10962e-25	-0.286973	8.50215e-05
CL1168.Contig11_All	72.34	131.01	96.68	219.62	165.92	127.26	238.02	217.13	251.18	88.67	110.7	157.7	0.262383	8.28396e-61	0.778029	0	1.24655	0	-0.515646	3.66764e-300	0.468517	0	-0.984163	0
Unigene20185_All	1.38	2.04	2.64	2.53	3.06	2.36	1.25	3.6	2.63	1.78	1.42	1.57	-0.334	0.00397347	0.395185	0.000349958	0.322499	0.00284151	-0.729185	1.68636e-09	-0.0726858	0.137867	-0.656499	1.16259e-07
CL5485.Contig2_All	0.67	0.76	0.38	0.66	1.11	1.03	0.21	0.91	0.67	0.21	0.57	0.62	-0.349737	0.00553724	0.634511	2.10159e-07	0.0116545	0.245305	-0.984248	3.92192e-14	-0.622856	3.48053e-07	-0.361391	0.0047645
CL12442.Contig2_All	1.08	0.61	1.12	0.34	0.67	0.58	0.95	0.43	0.59	0.91	1.9	1.88	0.751484	2.2509e-05	-0.812349	0.000383485	-0.495902	0.0117916	1.56383	1.18103e-13	0.316448	0.068824	1.24739	5.28785e-10
CL11987.Contig3_All	2.05	1.21	1.08	0.68	2.17	2.68	0.34	0.99	0.5	0.21	0.4	0.22	-2.37922	2.12546e-54	0.349259	0.000111794	-1.22595	1.9439e-22	-2.72848	4.37082e-80	-1.57521	4.01481e-40	-1.15327	6.51181e-10
CL1601.Contig11_All	8.89	9.8	10.83	13.14	6.16	8.41	8.16	13.51	13.38	3.47	4.14	5.88	-1.12389	3.93731e-180	-0.0875136	0.00285028	0.255653	1.40891e-16	-1.03638	3.74424e-149	0.343166	1.52802e-27	-1.37954	3.07724e-294
CL10867.Contig2_All	0.65	0.5	0.62	0.77	1.42	0.96	0.44	0.74	0.61	0.28	0.46	0.31	-0.764442	8.99419e-08	0.825202	1.15345e-13	0.0220459	0.229158	-1.58964	4.98926e-36	-0.803157	4.66196e-13	-0.786488	4.08672e-08
CL431.Contig2_All	8.85	10.55	10.34	13.46	16.17	9.49	13.93	13.61	11.43	5.85	10.93	11.19	-0.0773442	0.0412455	0.400191	1.08576e-15	0.403013	7.66216e-16	-0.477535	1.73764e-21	0.00282209	0.232747	-0.480357	2.35642e-21
CL7547.Contig1_All	3.01	1.69	2.06	2.03	2.39	3.14	0.91	1.79	1.87	1.86	2.7	1.94	-0.0509575	0.126782	0.163409	0.0115585	-0.554378	1.7202e-10	-0.214366	0.00119973	-0.717786	3.51059e-17	0.50342	6.24641e-09
CL927.Contig7_All	0.88	0.57	0.42	2.68	2.56	1.37	0.29	0.7	0.83	0.51	0.48	0.77	-0.0719461	0.176844	1.8299	1.19712e-25	-0.0237212	0.242586	-1.90185	2.02143e-27	-1.85362	6.22362e-26	-0.0482249	0.200083
CL10688.Contig2_All	2.98	3.51	1.89	5.97	2.12	5.05	4.39	4.93	4.7	1.93	3.52	3.08	0.0333941	0.164179	0.653692	1.37625e-16	0.752421	5.60815e-22	-0.620298	1.11535e-15	0.0987292	0.0471418	-0.719027	1.37751e-20
CL6362.Contig2_All	1.18	0.72	1.08	2.48	2.57	2.61	1.68	1.95	2.12	0.29	0.62	0.55	-1.0255	4.41011e-14	1.3664	5.67922e-51	0.958637	8.90737e-23	-2.3919	2.42382e-108	-0.407765	6.83326e-08	-1.98414	4.96256e-65
CL10994.Contig4_All	0.72	1.12	0.48	0.89	2.79	2.44	0.89	1.6	1.33	0.3	0.71	0.42	-0.682741	0.000155435	1.40524	2.93011e-25	0.735815	7.12007e-07	-2.08798	3.14265e-43	-0.669426	1.20024e-08	-1.41856	7.47272e-17
CL15862.Contig2_All	135.66	66.63	129.4	86.93	79.55	59.51	27.81	59.63	70.75	63.9	143.85	118.03	-0.0154214	0.0855555	-0.548719	5.32183e-208	-1.0534	0	0.533298	6.78692e-197	-0.504686	3.39454e-122	1.03798	0
Unigene48885_All	3.4	1.88	2.43	1.64	1.53	1.33	0.7	1.55	1.14	0.37	1.11	1.3	-1.45847	4.60571e-54	-0.773286	2.46921e-20	-1.17314	9.50823e-39	-0.68518	5.88104e-11	-0.399852	4.65122e-05	-0.285328	0.0044301
CL5300.Contig7_All	7.53	8.15	9.58	13.22	9.39	9.35	12.56	12.71	12.75	5.88	13.24	10.85	0.254603	1.09696e-07	0.343746	1.12308e-12	0.599993	9.14529e-38	-0.0891436	0.0100093	0.256247	3.38123e-09	-0.34539	5.78602e-15
CL9926.Contig2_All	30.2	19.23	25.86	36.02	39.84	38.34	29.23	29.97	36.83	12.79	24.13	27.88	-0.20175	1.82612e-07	0.605968	5.92497e-68	0.366484	4.93982e-24	-0.807717	2.23727e-112	-0.239484	1.65327e-13	-0.568233	7.37138e-52
CL259.Contig15_All	0.56	0.67	0.5	0.73	0.8	0.62	0.75	0.77	0.57	0.09	0.33	0.35	-1.14824	1.06605e-10	0.32021	0.00773452	0.279287	0.0167701	-1.46845	3.09248e-18	-0.040923	0.191468	-1.42753	8.67111e-17
CL7099.Contig7_All	2.14	1.31	2.4	1.87	1.55	1.94	2.97	3.22	2.69	1.93	2.5	2.37	0.229104	0.0249453	-0.120697	0.110125	0.619631	5.72448e-07	0.3498	0.00224462	0.740327	6.89902e-09	-0.390527	0.000493073
CL4196.Contig13_All	2.1	2.63	1.81	5.41	3.54	1.28	10.03	3.88	5.11	3.07	7.06	8.96	1.56066	9.55045e-58	0.652746	6.31221e-09	1.55201	2.19598e-56	0.907912	6.83869e-26	0.899269	9.28621e-25	0.00864311	0.213742
CL4357.Contig1_All	2.88	3.94	2.5	5.65	7.17	5.92	3.38	4.25	4.76	1.1	1.82	2.3	-0.82374	6.25476e-14	1.01026	9.97621e-36	0.423506	1.21564e-06	-1.834	1.2874e-86	-0.586758	5.17779e-15	-1.24725	1.28442e-33
CL10938.Contig3_All	3.35	7.28	2.56	7.47	13.73	8.91	3.65	10.38	4.91	1.18	1.7	2.45	-1.29285	9.12658e-34	1.19406	9.53467e-66	0.541869	2.6596e-12	-2.4869	2.22616e-180	-0.652187	9.93862e-25	-1.83471	6.54715e-79
Unigene9561_All	1.25	2.79	1.74	1.3	1.27	1.91	4.59	4.01	2.98	1.57	2.1	3.56	0.328703	6.48288e-07	-0.364416	1.18916e-06	1.00819	3.6309e-61	0.69312	6.65744e-22	1.37261	1.4231e-98	-0.679487	3.07404e-32
CL16271.Contig12_All	1.3	1.13	0.67	3.26	0.89	2	2.35	4.61	3.21	1.43	3.44	1.63	1.07586	6.44327e-19	0.996612	5.97731e-16	1.72996	2.04073e-56	0.0792445	0.0716894	0.733353	1.13517e-15	-0.654108	2.79251e-13
Unigene4982_All	178.96	143.03	316.81	112.99	30.38	111.05	99.74	103.59	88.82	185.48	302.7	270.92	0.255195	1.3377e-182	-1.32424	0	-1.11991	0	1.57944	0	0.204334	9.53519e-47	1.37511	0
Unigene41817_All	8.01	7.81	7.7	7.31	8.65	8.28	2.87	5.79	6.2	2.81	7.5	4.35	-0.677783	2.16513e-37	0.0462591	0.0904656	-0.651431	1.33969e-34	-0.724042	2.5547e-43	-0.697691	6.19422e-40	-0.0263514	0.160942
CL6665.Contig12_All	3.03	3.56	3.33	2.28	1.9	3.29	1.36	3.13	2.7	0.74	1.22	1.02	-1.73604	7.53003e-150	-0.406104	1.30246e-14	-0.452662	2.16821e-17	-1.32993	1.37427e-77	-0.0465576	0.113681	-1.28338	1.11615e-70
Unigene1791_All	5.02	7.44	3.69	17.09	12.4	9.24	5.74	7.44	12.38	1.77	4.61	4.75	-0.528648	1.17616e-16	1.26582	3.23496e-158	0.670255	2.24631e-37	-1.79447	2.54936e-265	-0.595563	3.05704e-45	-1.1989	5.20162e-97
CL3535.Contig4_All	5.77	6.14	4.53	10.13	12.74	10.61	4.85	8.67	10.04	1.76	3.62	3.74	-0.845004	1.28008e-42	1.02825	1.58647e-116	0.529611	2.3658e-27	-1.87325	6.81282e-288	-0.498635	4.64341e-34	-1.37462	9.24513e-131
CL5806.Contig8_All	1.16	3.02	3.07	1.55	0.94	1.88	1.09	1.5	0.98	0.7	2.9	2.04	-0.35437	0.000183414	-0.726807	1.68377e-11	-1.01456	8.24597e-19	0.372438	0.000275409	-0.287757	0.00924923	0.660194	2.93581e-08
CL4378.Contig2_All	6.88	6.86	6.91	11.23	10.05	9.01	15.06	12.5	10.04	4.2	3.71	4.21	-0.761332	8.9362e-33	0.556791	9.57415e-28	0.874695	5.80201e-73	-1.31812	2.59735e-114	0.317904	3.25387e-13	-1.63603	4.71383e-194
CL7783.Contig4_All	2.62	3.84	1.64	1.17	0.83	0.77	0.72	0.92	1.63	3.66	4.95	7.25	0.977369	6.51838e-54	-1.54237	1.38517e-55	-1.30088	2.78488e-43	2.51974	1.04494e-204	0.241492	0.0161823	2.27825	3.25088e-181
CL10701.Contig1_All	2.63	1.61	1.59	1.28	4.11	4.34	0.31	0.74	1.07	0.4	1.1	0.54	-1.51444	1.55904e-44	0.737512	8.89247e-24	-1.45556	1.20039e-41	-2.25196	7.7437e-124	-2.19307	2.57496e-118	-0.0588824	0.163977
Unigene49382_All	4.22	6.65	3.93	10.86	10.08	9.24	6.59	7.52	6.84	3.78	6.45	6.99	0.229029	0.000433973	1.0322	3.27752e-62	0.514067	2.58152e-14	-0.803169	5.20728e-42	-0.51813	6.24777e-20	-0.285038	5.07294e-06
[truncated: 31,274 more rows]
