# Supplementary material for: Transcriptome-Wide Gene Expression Plasticity in Stipa grandis in Response to Grazing Intensity Differences
Source: Int J Mol Sci. 2021 Nov 2;22(21):11882. doi: 10.3390/ijms222111882 (PMC8611654; doi:10.3390/ijms222111882)
Supplement: Supplementary file 1 [file ijms-22-11882-s001.zip › Table S3. Functional annotation of all analyzed transcripts.xlsx]

## Sheet: Sheet1
Gene ID	Kegg Orthology	Nt	Nr	Pfam	Swissprot	GO
Unigene20442_All	K11463//polycomb protein SUZ12	XM_020295267.1 PREDICTED: Aegilops tauschii subsp. tauschii polycomb group protein EMBRYONIC FLOWER 2-like (LOC109736049), transcript variant X5, mRNA	EMF protein [Phyllostachys edulis]		Polycomb group protein VERNALIZATION 2 OS=Arabidopsis thaliana GN=VRN2 PE=1 SV=2
CL2610.Contig28_All	K04354//serine/threonine-protein phosphatase 2A regulatory subunit B+ko03015//mRNA surveillance pathway	XM_010229293.2 PREDICTED: Brachypodium distachyon serine/threonine protein phosphatase 2A 55 kDa regulatory subunit B alpha isoform (LOC100839377), transcript variant X2, mRNA	PREDICTED: serine/threonine protein phosphatase 2A 55 kDa regulatory subunit B alpha isoform isoform X2 [Brachypodium distachyon] >KQK17955.1 hypothetical protein BRADI_1g37760 [Brachypodium distachyon]	WD domain, G-beta repeat	Serine/threonine protein phosphatase 2A 55 kDa regulatory subunit B alpha isoform OS=Oryza sativa subsp. japonica GN=Os06g0563300 PE=2 SV=2	GO:0070262//peptidyl-serine dephosphorylation;GO:0032502//developmental process;GO:0000278//mitotic cell cycle;GO:0005829//cytosol;GO:0019888//protein phosphatase regulator activity;GO:0000159//protein phosphatase type 2A complex
CL418.Contig15_All	K12896//splicing factor, arginine/serine-rich 7+ko03040//Spliceosome	XM_020341382.1 PREDICTED: Aegilops tauschii subsp. tauschii serine/arginine-rich splicing factor RS2Z33-like (LOC109782769), transcript variant X2, mRNA	Splicing factor, arginine/serine-rich 4 [Aegilops tauschii]	Zinc knuckle	Serine/arginine-rich splicing factor RS2Z33 OS=Arabidopsis thaliana GN=RS2Z33 PE=1 SV=1	GO:0003723//RNA binding;GO:0008270//zinc ion binding
CL5775.Contig6_All	K10863//aprataxin [EC:3.1.11.7 3.1.11.8 3.1.12.2]	XM_020292650.1 PREDICTED: Aegilops tauschii subsp. tauschii transcription factor bHLH140 (LOC109733434), mRNA	PREDICTED: transcription factor bHLH140 [Brachypodium distachyon] >KQK22146.1 hypothetical protein BRADI_1g65450 [Brachypodium distachyon]	Scavenger mRNA decapping enzyme C-term binding	Transcription factor bHLH140 OS=Arabidopsis thaliana GN=BHLH140 PE=3 SV=1	GO:0006790//sulfur compound metabolic process;GO:0047627//adenylylsulfatase activity;GO:0009150//purine ribonucleotide metabolic process
CL8022.Contig6_All		FP097605.1 Phyllostachys edulis cDNA clone: bphylf050p14, full insert sequence	uncharacterized protein LOC109774278 [Aegilops tauschii subsp. tauschii]	Cytochrome C oxidase copper chaperone (COX17)
CL7685.Contig7_All	K11323//histone arginine demethylase JMJD6 [EC:1.14.11.-];K04733//interleukin-1 receptor-associated kinase 4 [EC:2.7.11.1]	XM_003573246.3 PREDICTED: Brachypodium distachyon succinate dehydrogenase subunit 6, mitochondrial (LOC100836049), mRNA	Succinate dehydrogenase subunit 6, mitochondrial [Ananas comosus]	Glycine zipper 2TM domain	Succinate dehydrogenase subunit 6, mitochondrial OS=Oryza sativa subsp. japonica GN=SDH6 PE=1 SV=1	GO:0005749//mitochondrial respiratory chain complex II, succinate dehydrogenase complex (ubiquinone)
Unigene49519_All	K00924//kinase [EC:2.7.1.-]	XM_003557791.3 PREDICTED: Brachypodium distachyon calcium/calmodulin-dependent serine/threonine-protein kinase 1 (LOC100839740), transcript variant X1, mRNA	PREDICTED: calcium/calmodulin-dependent serine/threonine-protein kinase 1 isoform X1 [Brachypodium distachyon] >KQK21574.1 hypothetical protein BRADI_1g61637 [Brachypodium distachyon]	Protein kinase domain	Calcium/calmodulin-dependent serine/threonine-protein kinase 1 OS=Oryza sativa subsp. japonica GN=CAMK1 PE=1 SV=1	GO:0005634//nucleus;GO:0009738//abscisic acid-activated signaling pathway;GO:0005524//ATP binding;GO:0035556//intracellular signal transduction;GO:0005737//cytoplasm;GO:0046777//protein autophosphorylation;GO:0018105//peptidyl-serine phosphorylation;GO:0005509//calcium ion binding;GO:0004672//protein kinase activity;GO:0004683//calmodulin-dependent protein kinase activity;GO:0009931//calcium-depe…
CL4714.Contig10_All	K13448//calcium-binding protein CML+ko04626//Plant-pathogen interaction	XM_003563587.3 PREDICTED: Brachypodium distachyon probable calcium-binding protein CML21 (LOC100832020), transcript variant X2, mRNA	PREDICTED: probable calcium-binding protein CML21 [Brachypodium distachyon] >XP_010227514.1 PREDICTED: probable calcium-binding protein CML21 [Brachypodium distachyon] >KQK17712.1 hypothetical protein BRADI_1g36230 [Brachypodium distachyon]		Probable calcium-binding protein CML21 OS=Arabidopsis thaliana GN=CML21 PE=2 SV=1	GO:0005509//calcium ion binding
CL3141.Contig7_All	K13525//transitional endoplasmic reticulum ATPase+ko04141//Protein processing in endoplasmic reticulum	XM_003558744.3 PREDICTED: Brachypodium distachyon cell division control protein 48 homolog E (LOC100821547), mRNA	PREDICTED: cell division control protein 48 homolog E-like [Brachypodium distachyon] >KQK23612.1 hypothetical protein BRADI_1g74922 [Brachypodium distachyon]	ATPase family associated with various cellular activities (AAA)	Cell division control protein 48 homolog E OS=Arabidopsis thaliana GN=CDC48E PE=2 SV=2	GO:0016787//hydrolase activity;GO:0005524//ATP binding;GO:0051301//cell division
Unigene27361_All	K11423//histone-lysine N-methyltransferase SETD2 [EC:2.1.1.43]+ko00310//Lysine degradation	XM_010236857.2 PREDICTED: Brachypodium distachyon histone-lysine N-methyltransferase ASHR3-like (LOC100839831), mRNA	PREDICTED: histone-lysine N-methyltransferase ASHR3-like [Brachypodium distachyon]		Histone-lysine N-methyltransferase ASHR3 OS=Arabidopsis thaliana GN=ASHR3 PE=1 SV=1
CL8044.Contig9_All	K12836//splicing factor U2AF 35 kDa subunit+ko03040//Spliceosome	XR_002235402.1 PREDICTED: Aegilops tauschii subsp. tauschii splicing factor U2af small subunit A-like (LOC109773716), transcript variant X2, misc_RNA	Splicing factor U2af small subunit A [Triticum urartu]	Zinc finger C-x8-C-x5-C-x3-H type (and similar)	Splicing factor U2af small subunit A OS=Oryza sativa subsp. japonica GN=U2AF35A PE=2 SV=1
CL10484.Contig4_All	K03257//translation initiation factor 4A+ko03013//RNA transport	FP097895.1 Phyllostachys edulis cDNA clone: bphyst013l09, full insert sequence	eukaryotic initiation factor 4A-like [Aegilops tauschii subsp. tauschii] >EMS68416.1 Eukaryotic initiation factor 4A-1 [Triticum urartu] >EMT30822.1 Eukaryotic initiation factor 4A-1 [Aegilops tauschii]	DEAD/DEAH box helicase	Eukaryotic initiation factor 4A-3 OS=Oryza sativa subsp. japonica GN=Os02g0146600 PE=1 SV=1	GO:0010468//regulation of gene expression;GO:0005634//nucleus;GO:0005524//ATP binding;GO:0004386//helicase activity;GO:0005737//cytoplasm;GO:0003676//nucleic acid binding;GO:0006413//translational initiation;GO:0003743//translation initiation factor activity;GO:0005730//nucleolus;GO:0004004//ATP-dependent RNA helicase activity;GO:0010501//RNA secondary structure unwinding
CL1314.Contig32_All	K07936//GTP-binding nuclear protein Ran+ko03013//RNA transport+ko03008//Ribosome biogenesis in eukaryotes	FP094969.1 Phyllostachys edulis cDNA clone: bphyst009i19, full insert sequence	Ran-related GTP-binding protein [Festuca arundinacea]	Ras family	GTP-binding nuclear protein Ran-2 OS=Oryza sativa subsp. indica GN=RAN2 PE=2 SV=1	GO:0005634//nucleus;GO:0006913//nucleocytoplasmic transport;GO:0000054//ribosomal subunit export from nucleus;GO:0006606//protein import into nucleus;GO:0005525//GTP binding;GO:0015031//protein transport;GO:0005737//cytoplasm;GO:0003924//GTPase activity
CL17161.Contig3_All	K14165//atypical dual specificity phosphatase [EC:3.1.3.16 3.1.3.48];K20551//dual specificity protein phosphatase 1B [EC:3.1.3.16 3.1.3.48]+ko04016//MAPK signaling pathway - plant	XM_003567675.3 PREDICTED: Brachypodium distachyon dual specificity protein phosphatase 1B (LOC100821300), transcript variant X3, mRNA	dual specificity protein phosphatase 1B-like isoform X1 [Aegilops tauschii subsp. tauschii] >XP_020164292.1 dual specificity protein phosphatase 1B-like isoform X1 [Aegilops tauschii subsp. tauschii]		Dual specificity protein phosphatase 1B OS=Arabidopsis thaliana GN=DSPTP1B PE=1 SV=1	GO:0008138//protein tyrosine/serine/threonine phosphatase activity
Unigene37509_All		HE964569.1 TPA_inf: Brachypodium distachyon Ultaconserved-like element ULE683	PREDICTED: uncharacterized protein LOC100839736 isoform X1 [Brachypodium distachyon]
Unigene46384_All
CL8357.Contig8_All	K22020//mucin-19	XM_020317451.1 PREDICTED: Aegilops tauschii subsp. tauschii BTB/POZ domain-containing protein At1g67900 (LOC109758587), mRNA	BTB/POZ domain-containing protein At1g67900 [Aegilops tauschii subsp. tauschii]	NPH3 family	BTB/POZ domain-containing protein At1g67900 OS=Arabidopsis thaliana GN=At1g67900 PE=1 SV=1
CL15592.Contig24_All	K02717//photosystem II oxygen-evolving enhancer protein 2+ko01100//Metabolic pathways+ko00195//Photosynthesis	XM_003562119.3 PREDICTED: Brachypodium distachyon psbP-like protein 1, chloroplastic (LOC100840391), mRNA	hypothetical protein BRADI_1g77047 [Brachypodium distachyon]	PsbP	PsbP-like protein 1, chloroplastic OS=Arabidopsis thaliana GN=PPL1 PE=1 SV=1	GO:0005509//calcium ion binding;GO:0019898//extrinsic component of membrane;GO:0015979//photosynthesis;GO:0009654//photosystem II oxygen evolving complex
CL15409.Contig3_All	K08511//vesicle-associated membrane protein 72	FP100866.1 Phyllostachys edulis cDNA clone: bphyem123h02, full insert sequence	vesicle-associated membrane protein 724 [Sorghum bicolor] >KXG34786.2 hypothetical protein SORBI_3002G092200 [Sorghum bicolor]		Vesicle-associated membrane protein 724 OS=Arabidopsis thaliana GN=VAMP724 PE=2 SV=2	GO:0000149//SNARE binding;GO:0005484//SNAP receptor activity;GO:0006906//vesicle fusion;GO:0031201//SNARE complex;GO:0016021//integral component of membrane;GO:0006887//exocytosis;GO:0016192//vesicle-mediated transport
CL11782.Contig6_All	K11267//sister chromatid cohesion protein PDS5	XM_010231566.1 PREDICTED: Brachypodium distachyon uncharacterized LOC100826400 (LOC100826400), mRNA	Os06g0291800 [Oryza sativa Japonica Group] >BAS97309.1 Os06g0291800 [Oryza sativa Japonica Group]	Domain of unknown function		GO:0016021//integral component of membrane
CL9452.Contig5_All	K18626//trichohyalin;K14709//solute carrier family 39 (zinc transporter), member 1/2/3	XM_020318650.1 PREDICTED: Aegilops tauschii subsp. tauschii factor of DNA methylation 1-like (LOC109759811), mRNA	factor of DNA methylation 1-like [Aegilops tauschii subsp. tauschii]	XH domain	Factor of DNA methylation 4 OS=Arabidopsis thaliana GN=FDM4 PE=4 SV=1	GO:0031047//gene silencing by RNA
CL4783.Contig3_All	K17964//leucine-rich PPR motif-containing protein, mitochondrial	AK357315.1 Hordeum vulgare subsp. vulgare mRNA for predicted protein, complete cds, clone: NIASHv1050I04	pentatricopeptide repeat-containing protein At4g39620, chloroplastic [Aegilops tauschii subsp. tauschii]	PPR repeat family	Pentatricopeptide repeat-containing protein At4g39620, chloroplastic OS=Arabidopsis thaliana GN=EMB2453 PE=2 SV=1	GO:0006397//mRNA processing;GO:0043231//intracellular membrane-bounded organelle;GO:0003723//RNA binding;GO:0006417//regulation of translation;GO:0009451//RNA modification;GO:0008380//RNA splicing;GO:0004519//endonuclease activity;GO:0009507//chloroplast;GO:0009793//embryo development ending in seed dormancy
Unigene15498_All	K00924//kinase [EC:2.7.1.-]	AK366079.1 Hordeum vulgare subsp. vulgare mRNA for predicted protein, complete cds, clone: NIASHv2040D15	predicted protein [Hordeum vulgare subsp. vulgare]	Protein kinase domain	Receptor protein-tyrosine kinase CEPR2 OS=Arabidopsis thaliana GN=CEPR2 PE=1 SV=1
CL8018.Contig2_All	K13457//disease resistance protein RPM1+ko04626//Plant-pathogen interaction	XM_021460762.1 PREDICTED: Sorghum bicolor putative disease resistance RPP13-like protein 3 (LOC8079127), transcript variant X3, mRNA	PREDICTED: putative disease resistance RPP13-like protein 3 [Brachypodium distachyon]		Putative disease resistance RPP13-like protein 3 OS=Arabidopsis thaliana GN=RPP13L3 PE=3 SV=1	GO:0043531//ADP binding
CL7317.Contig1_All		FP100048.1 Phyllostachys edulis cDNA clone: bphyem117a07, full insert sequence	PREDICTED: thylakoid membrane protein slr0575 [Brachypodium distachyon] >KQJ96260.1 hypothetical protein BRADI_3g22030 [Brachypodium distachyon]	Protein of unknown function (DUF2854)		GO:0016021//integral component of membrane
CL3122.Contig7_All	K21026//acetylajmaline esterase [EC:3.1.1.80]+ko00901//Indole alkaloid biosynthesis+ko01110//Biosynthesis of secondary metabolites	FP096495.1 Phyllostachys edulis cDNA clone: bphylf032k05, full insert sequence	putative esterase [Oryza punctata]	GDSL-like Lipase/Acylhydrolase	GDSL esterase/lipase At1g28590 OS=Arabidopsis thaliana GN=At1g28590 PE=2 SV=2	GO:0016788//hydrolase activity, acting on ester bonds
CL8863.Contig4_All	K11324//DNA methyltransferase 1-associated protein 1	FP097402.1 Phyllostachys edulis cDNA clone: bphylf054o08, full insert sequence	SWR1-complex protein 4 [Aegilops tauschii subsp. tauschii]	SANT/Myb-like domain of DAMP1	SWR1-complex protein 4 OS=Arabidopsis thaliana GN=SWC4 PE=1 SV=1	GO:0045892//negative regulation of transcription, DNA-templated;GO:0000812//Swr1 complex;GO:0035267//NuA4 histone acetyltransferase complex;GO:0003677//DNA binding;GO:0006281//DNA repair;GO:0006338//chromatin remodeling;GO:0003714//transcription corepressor activity;GO:0043968//histone H2A acetylation;GO:0043967//histone H4 acetylation
Unigene38190_All	K09775//uncharacterized protein	XM_020292321.1 PREDICTED: Aegilops tauschii subsp. tauschii uncharacterized membrane protein YuiD-like (LOC109733096), mRNA	hypothetical protein TRIUR3_17926 [Triticum urartu]			GO:0016021//integral component of membrane
CL2170.Contig2_All	K20360//TBC1 domain family member 2	XM_020290847.1 PREDICTED: Aegilops tauschii subsp. tauschii GTPase-activating protein GYP1 (LOC109731674), mRNA	PREDICTED: GTPase-activating protein gyp1 [Brachypodium distachyon] >KQJ98729.1 hypothetical protein BRADI_3g38690 [Brachypodium distachyon]	Rab-GTPase-TBC domain		GO:0006886//intracellular protein transport;GO:0012505//endomembrane system;GO:0090630//activation of GTPase activity;GO:0031338//regulation of vesicle fusion;GO:0005622//intracellular;GO:0017137//Rab GTPase binding;GO:0005096//GTPase activator activity
CL1085.Contig8_All	K13161//heterogeneous nuclear ribonucleoprotein R;K11294//nucleolin;K12885//heterogeneous nuclear ribonucleoprotein G+ko03040//Spliceosome	XM_010240520.2 PREDICTED: Brachypodium distachyon nucleolin-like (LOC100842213), transcript variant X1, mRNA	PREDICTED: nucleolin-like isoform X1 [Brachypodium distachyon] >KQK16423.1 hypothetical protein BRADI_1g28670 [Brachypodium distachyon]	RNA recognition motif. (a.k.a. RRM, RBD, or RNP domain)	Formin-like protein 16 OS=Oryza sativa subsp. japonica GN=FH16 PE=2 SV=1	GO:0003723//RNA binding
CL443.Contig20_All	K15746//beta-carotene 3-hydroxylase [EC:1.14.15.24]+ko00906//Carotenoid biosynthesis+ko01100//Metabolic pathways+ko01110//Biosynthesis of secondary metabolites	XM_003580324.3 PREDICTED: Brachypodium distachyon beta-carotene 3-hydroxylase, chloroplastic (LOC100837035), mRNA	beta-carotene 3-hydroxylase, chloroplastic-like [Aegilops tauschii subsp. tauschii] >AFX79618.1 beta-carotene hydroxylase A1 [Triticum aestivum] >AFX79620.1 beta-carotene hydroxylase D1 [Triticum aestivum]		Beta-carotene hydroxylase 2, chloroplastic (Fragment) OS=Capsicum annuum GN=CA2 PE=2 SV=1	GO:0005506//iron ion binding;GO:0016021//integral component of membrane;GO:0008610//lipid biosynthetic process;GO:0016491//oxidoreductase activity
CL7947.Contig3_All	K14503//brassinosteroid resistant 1/2+ko04075//Plant hormone signal transduction	XM_003563726.3 PREDICTED: Brachypodium distachyon protein BZR1 homolog 3 (LOC100823855), mRNA	PREDICTED: protein BZR1 homolog 3 [Brachypodium distachyon] >KQK18037.1 hypothetical protein BRADI_1g38180 [Brachypodium distachyon]	BES1/BZR1 plant transcription factor, N-terminal	Protein BZR1 homolog 3 OS=Oryza sativa subsp. japonica GN=BZR3 PE=2 SV=1	GO:0003677//DNA binding;GO:0040008//regulation of growth;GO:0006351//transcription, DNA-templated;GO:0009742//brassinosteroid mediated signaling pathway;GO:0003700//DNA binding transcription factor activity
CL12893.Contig1_All	K02935//large subunit ribosomal protein L7/L12+ko03010//Ribosome	XM_014897843.1 PREDICTED: Brachypodium distachyon 50S ribosomal protein L7/L12 (LOC100846766), mRNA	PREDICTED: 50S ribosomal protein L7/L12 [Setaria italica] >KQK87245.1 hypothetical protein SETIT_037804mg [Setaria italica]	Ribosomal protein L7/L12 C-terminal domain	Vegetative cell wall protein gp1 OS=Chlamydomonas reinhardtii GN=GP1 PE=1 SV=1	GO:0005840//ribosome;GO:0006412//translation;GO:0003735//structural constituent of ribosome
CL4518.Contig9_All	K14325//RNA-binding protein with serine-rich domain 1+ko03015//mRNA surveillance pathway+ko03013//RNA transport	XM_003573562.3 PREDICTED: Brachypodium distachyon RNA-binding protein mde7 (LOC100829014), mRNA	U1 small nuclear ribonucleoprotein A [Aegilops tauschii subsp. tauschii]	RNA recognition motif. (a.k.a. RRM, RBD, or RNP domain)		GO:0003729//mRNA binding
CL6871.Contig7_All		XM_003573837.3 PREDICTED: Brachypodium distachyon protein HGH1 homolog (LOC100836475), mRNA	PREDICTED: protein HGH1 homolog [Brachypodium distachyon] >KQJ96574.1 hypothetical protein BRADI_3g24960 [Brachypodium distachyon]	Domain of unknown function (DUF383)
Unigene30086_All	K13172//serine/arginine repetitive matrix protein 2;K22020//mucin-19	FP096968.1 Phyllostachys edulis cDNA clone: bphyst021i04, full insert sequence	hypothetical protein PAHAL_C01821 [Panicum hallii]	ZF-HD protein dimerisation region	Zinc-finger homeodomain protein 6 OS=Oryza sativa subsp. japonica GN=ZHD6 PE=2 SV=1	GO:0046872//metal ion binding;GO:0003677//DNA binding;GO:0005634//nucleus;GO:0006355//regulation of transcription, DNA-templated;GO:0006351//transcription, DNA-templated
Unigene31185_All		XM_003581526.3 PREDICTED: Brachypodium distachyon serine, glycine and glutamine-rich protein-like (LOC100825384), mRNA	uncharacterized protein LOC109765515 isoform X2 [Aegilops tauschii subsp. tauschii]	zinc-finger of the FCS-type, C2-C2	Proline-rich receptor-like protein kinase PERK10 OS=Arabidopsis thaliana GN=PERK10 PE=1 SV=2
CL16636.Contig3_All	K12471//epsin+ko04144//Endocytosis	XM_006648015.2 PREDICTED: Oryza brachyantha clathrin interactor EPSIN 2 (LOC102708411), mRNA	PREDICTED: clathrin interactor EPSIN 2 [Setaria italica] >KQL32019.1 hypothetical protein SETIT_016238mg [Setaria italica]	ENTH domain	Clathrin interactor EPSIN 2 OS=Arabidopsis thaliana GN=EPSIN2 PE=1 SV=1
CL8543.Contig42_All	K10257//acyl-lipid omega-3 desaturase [EC:1.14.19.25 1.14.19.35 1.14.19.36]	XM_003558109.3 PREDICTED: Brachypodium distachyon omega-3 fatty acid desaturase, chloroplastic (LOC100831377), mRNA	Os03g0290300, partial [Oryza sativa Japonica Group] >BAS83667.1 Os03g0290300, partial [Oryza sativa Japonica Group]	Fatty acid desaturase	Omega-3 fatty acid desaturase, chloroplastic OS=Ricinus communis GN=FAD7A-1 PE=2 SV=1	GO:0016021//integral component of membrane;GO:0006629//lipid metabolic process;GO:0016717//oxidoreductase activity, acting on paired donors, with oxidation of a pair of donors resulting in the reduction of molecular oxygen to two molecules of water
Unigene29489_All	K15397//3-ketoacyl-CoA synthase [EC:2.3.1.199]+ko01110//Biosynthesis of secondary metabolites+ko00062//Fatty acid elongation	XM_003571489.3 PREDICTED: Brachypodium distachyon 3-ketoacyl-CoA synthase 11 (LOC100831254), mRNA	hypothetical protein PAHAL_D00977 [Panicum hallii]	FAE1/Type III polyketide synthase-like protein	3-ketoacyl-CoA synthase 11 OS=Arabidopsis thaliana GN=KCS11 PE=1 SV=1	GO:0016021//integral component of membrane;GO:0006633//fatty acid biosynthetic process;GO:0016747//transferase activity, transferring acyl groups other than amino-acyl groups
Unigene45789_All	K13172//serine/arginine repetitive matrix protein 2;K00430//peroxidase [EC:1.11.1.7]+ko01100//Metabolic pathways+ko01110//Biosynthesis of secondary metabolites+ko00940//Phenylpropanoid biosynthesis;K14325//RNA-binding protein with serine-rich domain 1+ko03015//mRNA surveillance pathway+ko03013//RNA transport	XM_003570192.3 PREDICTED: Brachypodium distachyon uncharacterized LOC100837179 (LOC100837179), mRNA	PREDICTED: uncharacterized protein LOC100837179 [Brachypodium distachyon] >KQK01035.1 hypothetical protein BRADI_3g53440 [Brachypodium distachyon]		Serine/arginine-rich splicing factor SR45 OS=Arabidopsis thaliana GN=SR45 PE=1 SV=1
Unigene1606_All		AP014966.1 Oryza sativa Japonica Group DNA, chromosome 10, cultivar: Nipponbare, complete sequence	Hypothetical protein [Oryza sativa Japonica Group] >AAP53034.1 expressed protein [Oryza sativa Japonica Group] >BAT10364.1 Os10g0331400 [Oryza sativa Japonica Group]
CL2187.Contig3_All	K11583//serine/threonine-protein phosphatase 2A regulatory subunit B''+ko03015//mRNA surveillance pathway	XM_003571036.3 PREDICTED: Brachypodium distachyon probable serine/threonine protein phosphatase 2A regulatory subunit B''delta (LOC100829304), transcript variant X1, mRNA	predicted protein [Hordeum vulgare subsp. vulgare]	EF-hand domain pair	Probable serine/threonine protein phosphatase 2A regulatory subunit B''delta OS=Arabidopsis thaliana GN=B''DELTA PE=3 SV=1	GO:0005509//calcium ion binding
Unigene30907_All	K20547//basic endochitinase B [EC:3.2.1.14]+ko04016//MAPK signaling pathway - plant+ko00520//Amino sugar and nucleotide sugar metabolism+ko01100//Metabolic pathways;K02184//formin 2;K21952//CASK-interacting protein	XM_020337766.1 PREDICTED: Aegilops tauschii subsp. tauschii small nuclear ribonucleoprotein E-like (LOC109779153), mRNA	hypothetical protein BU14_0130s0023 [Porphyra umbilicalis]		Sulfated surface glycoprotein 185 OS=Volvox carteri PE=1 SV=1	GO:0016021//integral component of membrane
CL3493.Contig11_All	K20871//putative beta-1,4-xylosyltransferase IRX14 [EC:2.4.2.-]	XM_003563408.3 PREDICTED: Brachypodium distachyon probable glucuronosyltransferase Os06g0687900 (LOC100828169), mRNA	PREDICTED: probable glucuronosyltransferase Os06g0687900 [Setaria italica] >KQL11887.1 hypothetical protein SETIT_006224mg [Setaria italica]	Glycosyltransferase family 43	Probable glucuronosyltransferase Os06g0687900 OS=Oryza sativa subsp. japonica GN=Os06g0687900 PE=2 SV=1	GO:0015018//galactosylgalactosylxylosylprotein 3-beta-glucuronosyltransferase activity;GO:0016021//integral component of membrane;GO:0071555//cell wall organization;GO:0000139//Golgi membrane
CL9695.Contig5_All	K01510//apyrase [EC:3.6.1.5]+ko00230//Purine metabolism+ko00240//Pyrimidine metabolism	XM_020321190.1 PREDICTED: Aegilops tauschii subsp. tauschii probable apyrase 7 (LOC109762348), mRNA	PREDICTED: probable apyrase 7 [Brachypodium distachyon] >KQK20651.1 hypothetical protein BRADI_1g55820 [Brachypodium distachyon] >KQK20652.1 hypothetical protein BRADI_1g55820 [Brachypodium distachyon] >KQK20653.1 hypothetical protein BRADI_1g55820 [Brachypodium distachyon]	GDA1/CD39 (nucleoside phosphatase) family	Probable apyrase 7 OS=Arabidopsis thaliana GN=APY7 PE=2 SV=1	GO:0016787//hydrolase activity;GO:0009901//anther dehiscence;GO:0016021//integral component of membrane;GO:0010584//pollen exine formation
CL3806.Contig3_All	K06269//serine/threonine-protein phosphatase PP1 catalytic subunit [EC:3.1.3.16]+ko03015//mRNA surveillance pathway	XM_003567618.3 PREDICTED: Brachypodium distachyon serine/threonine-protein phosphatase PP1 (LOC100829796), mRNA	PREDICTED: serine/threonine-protein phosphatase PP1 [Brachypodium distachyon] >KQK04258.1 hypothetical protein BRADI_2g12650 [Brachypodium distachyon]	Calcineurin-like phosphoesterase	Serine/threonine-protein phosphatase PP1 OS=Phaseolus vulgaris PE=2 SV=1	GO:0046872//metal ion binding;GO:0004721//phosphoprotein phosphatase activity
CL589.Contig4_All	K08176//MFS transporter, PHS family, inorganic phosphate transporter	AK369441.1 Hordeum vulgare subsp. vulgare mRNA for predicted protein, complete cds, clone: NIASHv2091F01	predicted protein [Hordeum vulgare subsp. vulgare]	Plant protein of unknown function (DUF863)
Unigene54511_All			hypothetical protein BRADI_2g60143 [Brachypodium distachyon]
CL500.Contig2_All		XM_016017513.1 PREDICTED: Ziziphus jujuba protein YIPF6 homolog (LOC107409740), mRNA
CL7917.Contig4_All	K22733//magnesium transporter	XM_003571869.3 PREDICTED: Brachypodium distachyon putative pentatricopeptide repeat-containing protein At5g52630 (LOC100842147), mRNA	hypothetical protein PAHAL_J01422 [Panicum hallii]	DYW family of nucleic acid deaminases	Pentatricopeptide repeat-containing protein At4g33990 OS=Arabidopsis thaliana GN=EMB2758 PE=3 SV=2	GO:0043231//intracellular membrane-bounded organelle;GO:0003723//RNA binding;GO:0008270//zinc ion binding;GO:0009451//RNA modification;GO:0004519//endonuclease activity
Unigene5520_All
Unigene1564_All		XM_003567705.3 PREDICTED: Brachypodium distachyon mediator of RNA polymerase II transcription subunit 9-like (LOC100830621), transcript variant X1, mRNA	PREDICTED: mediator of RNA polymerase II transcription subunit 9-like [Brachypodium distachyon] >XP_010230926.1 PREDICTED: mediator of RNA polymerase II transcription subunit 9-like [Brachypodium distachyon] >KQK04487.1 hypothetical protein BRADI_2g13760 [Brachypodium distachyon]			GO:0001104//RNA polymerase II transcription cofactor activity;GO:0016592//mediator complex
CL3551.Contig24_All	K02184//formin 2;K04733//interleukin-1 receptor-associated kinase 4 [EC:2.7.11.1]	HG670306.1 Triticum aestivum chromosome 3B, genomic scaffold, cultivar Chinese Spring	PREDICTED: PHD finger protein At1g33420 [Brachypodium distachyon] >KQK10867.1 hypothetical protein BRADI_2g56710 [Brachypodium distachyon]	PHD-finger	PHD finger protein At1g33420 OS=Arabidopsis thaliana GN=At1g33420 PE=1 SV=1	GO:0046872//metal ion binding
CL4931.Contig35_All	K01054//acylglycerol lipase [EC:3.1.1.23]+ko01100//Metabolic pathways+ko00561//Glycerolipid metabolism	AK357447.1 Hordeum vulgare subsp. vulgare mRNA for predicted protein, complete cds, clone: NIASHv1053L21	uncharacterized protein LOC109774498 isoform X1 [Aegilops tauschii subsp. tauschii] >XP_020188814.1 uncharacterized protein LOC109774498 isoform X2 [Aegilops tauschii subsp. tauschii]	Serine aminopeptidase, S33	Classical arabinogalactan protein 9 OS=Arabidopsis thaliana GN=AGP9 PE=1 SV=2	GO:0016020//membrane;GO:0016298//lipase activity;GO:0006629//lipid metabolic process
CL1459.Contig1_All	K01230//mannosyl-oligosaccharide alpha-1,2-mannosidase [EC:3.2.1.113]+ko04141//Protein processing in endoplasmic reticulum+ko00510//N-Glycan biosynthesis+ko01100//Metabolic pathways	FP096454.1 Phyllostachys edulis cDNA clone: bphyem207p20, full insert sequence	PREDICTED: mannosyl-oligosaccharide 1,2-alpha-mannosidase MNS1-like isoform X2 [Brachypodium distachyon] >KQJ84444.1 hypothetical protein BRADI_5g20920 [Brachypodium distachyon]	Glycosyl hydrolase family 47	Mannosyl-oligosaccharide 1,2-alpha-mannosidase MNS1 OS=Arabidopsis thaliana GN=MNS1 PE=1 SV=1	GO:0016020//membrane;GO:0005783//endoplasmic reticulum;GO:0008152//metabolic process;GO:0004571//mannosyl-oligosaccharide 1,2-alpha-mannosidase activity;GO:0005509//calcium ion binding;GO:0006491//N-glycan processing;GO:0000139//Golgi membrane
CL1830.Contig16_All	K00383//glutathione reductase (NADPH) [EC:1.8.1.7]+ko00480//Glutathione metabolism	XM_003570322.3 PREDICTED: Brachypodium distachyon glutathione reductase, cytosolic (LOC100823986), mRNA	PREDICTED: glutathione reductase, cytosolic [Oryza brachyantha] >XP_015689353.1 PREDICTED: glutathione reductase, cytosolic [Oryza brachyantha]	Pyridine nucleotide-disulphide oxidoreductase	Glutathione reductase, cytosolic OS=Oryza sativa subsp. japonica GN=GRC2 PE=2 SV=2	GO:0009055//electron transfer activity;GO:0050660//flavin adenine dinucleotide binding;GO:0005777//peroxisome;GO:0005737//cytoplasm;GO:0045454//cell redox homeostasis;GO:0050661//NADP binding;GO:0006749//glutathione metabolic process;GO:0000305//response to oxygen radical;GO:0004362//glutathione-disulfide reductase activity
Unigene9435_All	K03006//DNA-directed RNA polymerase II subunit RPB1 [EC:2.7.7.6]+ko00230//Purine metabolism+ko03020//RNA polymerase+ko01100//Metabolic pathways+ko00240//Pyrimidine metabolism		PREDICTED: proline-rich receptor-like protein kinase PERK9 [Glycine max] >KRH71097.1 hypothetical protein GLYMA_02G129300 [Glycine max]			GO:0005199//structural constituent of cell wall;GO:0004674//protein serine/threonine kinase activity;GO:0005524//ATP binding;GO:0004672//protein kinase activity;GO:0016021//integral component of membrane
Unigene54585_All	K09419//heat shock transcription factor, other eukaryote	XM_006656988.2 PREDICTED: Oryza brachyantha heat stress transcription factor C-2b-like (LOC102712547), mRNA	hypothetical protein F775_44074 [Aegilops tauschii]	HSF-type DNA-binding	Heat stress transcription factor C-2b OS=Oryza sativa subsp. japonica GN=HSFC2B PE=3 SV=1
CL9015.Contig1_All		AK370780.1 Hordeum vulgare subsp. vulgare mRNA for predicted protein, complete cds, clone: NIASHv2116M10	unnamed protein product [Triticum aestivum]	Protein of unknown function (DUF1685)
CL7845.Contig3_All	K21867//potassium channel;K04733//interleukin-1 receptor-associated kinase 4 [EC:2.7.11.1]	AK360268.1 Hordeum vulgare subsp. vulgare mRNA for predicted protein, complete cds, clone: NIASHv1114C07	probable zinc metalloprotease EGY3, chloroplastic [Aegilops tauschii subsp. tauschii]	Peptidase family M50	Probable zinc metalloprotease EGY3, chloroplastic OS=Oryza sativa subsp. japonica GN=EGY3 PE=2 SV=1	GO:0009644//response to high light intensity;GO:0016021//integral component of membrane;GO:0042542//response to hydrogen peroxide;GO:0009408//response to heat
CL5075.Contig1_All	K09060//plant G-box-binding factor	XM_020302838.1 PREDICTED: Aegilops tauschii subsp. tauschii ocs element-binding factor 1-like (LOC109743749), mRNA	PREDICTED: ocs element-binding factor 1-like [Brachypodium distachyon] >KQK07912.1 hypothetical protein BRADI_2g38380 [Brachypodium distachyon]	bZIP transcription factor	Ocs element-binding factor 1 OS=Zea mays GN=OBF1 PE=2 SV=2	GO:0005634//nucleus;GO:0003700//DNA binding transcription factor activity
Unigene26777_All	K19073//divinyl chlorophyllide a 8-vinyl-reductase [EC:1.3.1.75]+ko00860//Porphyrin and chlorophyll metabolism+ko01100//Metabolic pathways+ko01110//Biosynthesis of secondary metabolites	XM_020329897.1 PREDICTED: Aegilops tauschii subsp. tauschii uncharacterized protein ycf39 (LOC109771198), mRNA	unnamed protein product [Triticum aestivum]	NmrA-like family	Uncharacterized protein ycf39 OS=Cyanophora paradoxa GN=ycf39 PE=3 SV=1	GO:0003743//translation initiation factor activity;GO:0010207//photosystem II assembly;GO:0009534//chloroplast thylakoid
CL8779.Contig3_All	K00430//peroxidase [EC:1.11.1.7]+ko01100//Metabolic pathways+ko01110//Biosynthesis of secondary metabolites+ko00940//Phenylpropanoid biosynthesis;K11649//SWI/SNF related-matrix-associated actin-dependent regulator of chromatin subfamily C	XM_010230797.2 PREDICTED: Brachypodium distachyon uncharacterized LOC100836590 (LOC100836590), mRNA	hypothetical protein OsI_10257 [Oryza sativa Indica Group]	Protein of unknown function (DUF1677)	Formin-like protein 8 OS=Oryza sativa subsp. japonica GN=FH8 PE=2 SV=1
CL13669.Contig3_All	K21952//CASK-interacting protein	XM_003562858.3 PREDICTED: Brachypodium distachyon uncharacterized LOC100839277 (LOC100839277), mRNA	uncharacterized protein LOC109735990 [Aegilops tauschii subsp. tauschii]	Cotton fibre expressed protein	Proline-rich receptor-like protein kinase PERK9 OS=Arabidopsis thaliana GN=PERK9 PE=1 SV=1
CL3252.Contig11_All	K17500//integrin-linked kinase-associated serine/threonine phosphatase 2C [EC:3.1.3.16]	XM_003578190.3 PREDICTED: Brachypodium distachyon probable protein phosphatase 2C 69 (LOC100822279), mRNA	PREDICTED: probable protein phosphatase 2C 69 [Brachypodium distachyon] >KQJ90524.1 hypothetical protein BRADI_4g32230 [Brachypodium distachyon]	Protein phosphatase 2C	Probable protein phosphatase 2C 69 OS=Oryza sativa subsp. japonica GN=Os09g0459600 PE=2 SV=1	GO:0046872//metal ion binding;GO:0004722//protein serine/threonine phosphatase activity
CL7169.Contig1_All		XM_003580353.3 PREDICTED: Brachypodium distachyon uncharacterized LOC100845356 (LOC100845356), mRNA	PH01B035L11.10 [Phyllostachys edulis]
CL16033.Contig5_All	K00430//peroxidase [EC:1.11.1.7]+ko01100//Metabolic pathways+ko01110//Biosynthesis of secondary metabolites+ko00940//Phenylpropanoid biosynthesis	XM_003559331.3 PREDICTED: Brachypodium distachyon putative S-adenosyl-L-methionine-dependent methyltransferase SCO7813 (LOC100835979), mRNA	predicted protein [Hordeum vulgare subsp. vulgare]	Leucine carboxyl methyltransferase	Formin-like protein 5 OS=Oryza sativa subsp. japonica GN=FH5 PE=2 SV=2	GO:0008757//S-adenosylmethionine-dependent methyltransferase activity;GO:0005829//cytosol;GO:0032259//methylation
CL1176.Contig9_All	K00789//S-adenosylmethionine synthetase [EC:2.5.1.6]+ko01230//Biosynthesis of amino acids+ko01100//Metabolic pathways+ko01110//Biosynthesis of secondary metabolites+ko00270//Cysteine and methionine metabolism	FP099529.1 Phyllostachys edulis cDNA clone: bphylf025m08, full insert sequence	S-adenosylmethionine synthase 1 [Aegilops tauschii subsp. tauschii] >A6XMY9.1 RecName: Full=S-adenosylmethionine synthase 1; Short=AdoMet synthase 1; AltName: Full=Methionine adenosyltransferase 1; Short=MAT 1 >ABJ15731.1 S-adenosylmethionine synthetase 1 [Triticum monococcum] >EMT05283.1 S-adenosylmethionine synthetase 1 [Aegilops tauschii]	S-adenosylmethionine synthetase, C-terminal domain	S-adenosylmethionine synthase 1 OS=Triticum monococcum GN=SAMS1 PE=2 SV=1	GO:0046872//metal ion binding;GO:0005524//ATP binding;GO:0005829//cytosol;GO:0006730//one-carbon metabolic process;GO:0004478//methionine adenosyltransferase activity;GO:0006556//S-adenosylmethionine biosynthetic process
CL11318.Contig4_All	K14487//auxin responsive GH3 gene family+ko04075//Plant hormone signal transduction	JN241678.1 Echinochloa crus-galli GH31 (GH31) mRNA, complete cds	PREDICTED: probable indole-3-acetic acid-amido synthetase GH3.8 [Setaria italica] >KQK90345.1 hypothetical protein SETIT_034733mg [Setaria italica]	GH3 auxin-responsive promoter	Probable indole-3-acetic acid-amido synthetase GH3.8 OS=Oryza sativa subsp. japonica GN=GH3.8 PE=2 SV=1	GO:0016874//ligase activity
CL7279.Contig1_All	K01940//argininosuccinate synthase [EC:6.3.4.5]+ko00250//Alanine, aspartate and glutamate metabolism+ko00220//Arginine biosynthesis+ko01230//Biosynthesis of amino acids+ko01100//Metabolic pathways+ko01110//Biosynthesis of secondary metabolites;K06236//collagen, type I, alpha+ko04933//AGE-RAGE signaling pathway in diabetic complications	XM_020309662.1 PREDICTED: Aegilops tauschii subsp. tauschii uncharacterized LOC109750710 (LOC109750710), transcript variant X2, mRNA	putative Myb-like DNA-binding domain-containing protein [Oryza punctata]	MYB-CC type transfactor, LHEQLE motif	Myb family transcription factor PHL5 OS=Arabidopsis thaliana GN=PHL5 PE=2 SV=1
Unigene87504_All		XM_020303466.1 PREDICTED: Aegilops tauschii subsp. tauschii mediator of RNA polymerase II transcription subunit 16 (LOC109744360), transcript variant X2, mRNA	hypothetical protein BRADI_3g29990 [Brachypodium distachyon]	HIT zinc finger	Mediator of RNA polymerase II transcription subunit 16 OS=Arabidopsis thaliana GN=MED16 PE=1 SV=1	GO:1901672//positive regulation of systemic acquired resistance;GO:0006970//response to osmotic stress;GO:0006355//regulation of transcription, DNA-templated;GO:0016592//mediator complex;GO:0048586//regulation of long-day photoperiodism, flowering;GO:0048364//root development;GO:0010104//regulation of ethylene-activated signaling pathway;GO:2001009//regulation of plant-type cell wall cellulose bi…
Unigene13640_All
Unigene54282_All	K14775//ribosome biogenesis protein UTP30	AK425141.1 Brachypodium distachyon mRNA, clone: PL016C01-A-006_G02	ribosomal L1 domain-containing protein 1-like [Aegilops tauschii subsp. tauschii]	Ribosomal protein L1p/L10e family	Vegetative cell wall protein gp1 OS=Chlamydomonas reinhardtii GN=GP1 PE=1 SV=1	GO:0000470//maturation of LSU-rRNA;GO:0003723//RNA binding;GO:0030686//90S preribosome
CL3697.Contig21_All	K09480//digalactosyldiacylglycerol synthase [EC:2.4.1.241]+ko01100//Metabolic pathways+ko00561//Glycerolipid metabolism	XM_003575040.3 PREDICTED: Brachypodium distachyon digalactosyldiacylglycerol synthase 1, chloroplastic (LOC100824823), mRNA	hypothetical protein BRADI_3g45180 [Brachypodium distachyon]	Glycosyl transferases group 1	Digalactosyldiacylglycerol synthase 1, chloroplastic OS=Glycine max GN=DGD1 PE=2 SV=1	GO:0019375//galactolipid biosynthetic process;GO:0035250//UDP-galactosyltransferase activity;GO:0009707//chloroplast outer membrane
CL3677.Contig1_All		XM_003578411.3 PREDICTED: Brachypodium distachyon zinc finger protein 7-like (LOC100838234), mRNA	PREDICTED: zinc finger protein 7-like [Brachypodium distachyon] >KQJ86126.1 hypothetical protein BRADI_4g03460 [Brachypodium distachyon]	C2H2-type zinc finger	Zinc finger protein KNUCKLES OS=Arabidopsis thaliana GN=KNU PE=1 SV=1	GO:0005634//nucleus;GO:0003676//nucleic acid binding
CL15581.Contig12_All	K18670//dual specificity protein kinase YAK1 [EC:2.7.12.1]	XM_020303991.1 PREDICTED: Aegilops tauschii subsp. tauschii serine/threonine-protein kinase ppk15-like (LOC109744848), transcript variant X2, mRNA	uncharacterized protein LOC109744848 isoform X2 [Aegilops tauschii subsp. tauschii]	Protein kinase domain	Cyclin-dependent kinase F-3 OS=Oryza sativa subsp. japonica GN=CDKF-3 PE=2 SV=1	GO:0005524//ATP binding;GO:0004672//protein kinase activity
CL15142.Contig3_All	K12447//UDP-sugar pyrophosphorylase [EC:2.7.7.64]+ko00520//Amino sugar and nucleotide sugar metabolism+ko00040//Pentose and glucuronate interconversions+ko01100//Metabolic pathways+ko00052//Galactose metabolism+ko00053//Ascorbate and aldarate metabolism	XM_003576077.3 PREDICTED: Brachypodium distachyon uncharacterized LOC100833303 (LOC100833303), mRNA	PREDICTED: uncharacterized protein LOC100833303 [Brachypodium distachyon] >KQJ85562.1 hypothetical protein BRADI_4g00270 [Brachypodium distachyon]	Peptidase family S64
CL7887.Contig10_All	K02184//formin 2	XM_020296988.1 PREDICTED: Aegilops tauschii subsp. tauschii chloroplastic group IIA intron splicing facilitator CRS1, chloroplastic (LOC109737860), mRNA	PREDICTED: chloroplastic group IIA intron splicing facilitator CRS1, chloroplastic isoform X1 [Brachypodium distachyon] >KQJ96248.1 hypothetical protein BRADI_3g21852 [Brachypodium distachyon]	CRS1 / YhbY (CRM) domain	Chloroplastic group IIA intron splicing facilitator CRS1, chloroplastic OS=Oryza sativa subsp. japonica GN=Os08g0360100 PE=2 SV=1	GO:0003723//RNA binding;GO:0000373//Group II intron splicing
Unigene33445_All	K14638//solute carrier family 15 (peptide/histidine transporter), member 3/4	FP091779.1 Phyllostachys edulis cDNA clone: bphyem202n04, full insert sequence	unnamed protein product [Triticum aestivum]	POT family	Protein NRT1/ PTR FAMILY 8.1 OS=Arabidopsis thaliana GN=NPF8.1 PE=1 SV=1
Unigene33821_All	K03260//translation initiation factor 4G+ko03013//RNA transport	XM_010241773.2 PREDICTED: Brachypodium distachyon eukaryotic translation initiation factor isoform 4G-1 (LOC100822809), mRNA	PREDICTED: eukaryotic translation initiation factor isoform 4G-1 [Brachypodium distachyon] >KQJ83387.1 hypothetical protein BRADI_5g14687 [Brachypodium distachyon]	MIF4G domain	Eukaryotic translation initiation factor isoform 4G-1 OS=Triticum aestivum PE=1 SV=2	GO:0003723//RNA binding;GO:0009615//response to virus;GO:0046740//transport of virus in host, cell to cell
CL16339.Contig13_All	K09539//DnaJ homolog subfamily C member 19	AK331925.1 Triticum aestivum cDNA, clone: SET1_L03, cultivar: Chinese Spring	PREDICTED: mitochondrial import inner membrane translocase subunit TIM14-3 [Brachypodium distachyon] >KQK02241.1 hypothetical protein BRADI_2g00300 [Brachypodium distachyon]	Pam16	Mitochondrial import inner membrane translocase subunit TIM14-1 OS=Arabidopsis thaliana GN=TIM14-1 PE=1 SV=1
CL2153.Contig7_All	K01602//ribulose-bisphosphate carboxylase small chain [EC:4.1.1.39]+ko01100//Metabolic pathways+ko00710//Carbon fixation in photosynthetic organisms+ko01200//Carbon metabolism+ko00630//Glyoxylate and dicarboxylate metabolism	AK358672.1 Hordeum vulgare subsp. vulgare mRNA for predicted protein, complete cds, clone: NIASHv1081F05	PREDICTED: ribulose bisphosphate carboxylase small chain, chloroplastic-like [Brachypodium distachyon] >KQJ81957.1 hypothetical protein BRADI_5g04080 [Brachypodium distachyon]	Ribulose bisphosphate carboxylase, small chain	Ribulose bisphosphate carboxylase small chain, chloroplastic OS=Hordeum vulgare PE=2 SV=1	GO:0015977//carbon fixation;GO:0009853//photorespiration;GO:0004497//monooxygenase activity;GO:0015979//photosynthesis;GO:0016984//ribulose-bisphosphate carboxylase activity;GO:0009507//chloroplast
CL16575.Contig73_All	K14137//protein prenyltransferase alpha subunit repeat containing protein 1	XM_020316615.1 PREDICTED: Aegilops tauschii subsp. tauschii protein prenyltransferase alpha subunit repeat-containing protein 1 (LOC109757783), transcript variant X2, mRNA	protein prenyltransferase alpha subunit repeat-containing protein 1 isoform X2 [Aegilops tauschii subsp. tauschii]	Protein of unknown function (DUF436)	Protein argonaute 2 OS=Oryza sativa subsp. japonica GN=AGO2 PE=2 SV=2	GO:0018342//protein prenylation;GO:1990234//transferase complex;GO:0008318//protein prenyltransferase activity;GO:0005737//cytoplasm
CL12621.Contig2_All	K14292//trimethylguanosine synthase [EC:2.1.1.-]+ko03013//RNA transport;K07213//copper chaperone	XM_003569648.3 PREDICTED: Brachypodium distachyon uncharacterized LOC100827164 (LOC100827164), transcript variant X1, mRNA	PREDICTED: uncharacterized protein LOC100827164 [Brachypodium distachyon] >XP_010232249.1 PREDICTED: uncharacterized protein LOC100827164 [Brachypodium distachyon] >KQK09504.1 hypothetical protein BRADI_2g48360 [Brachypodium distachyon] >KQK09505.1 hypothetical protein BRADI_2g48360 [Brachypodium distachyon]	Heavy-metal-associated domain	Protein SODIUM POTASSIUM ROOT DEFECTIVE 1 OS=Arabidopsis thaliana GN=NAKR1 PE=1 SV=1	GO:0046914//transition metal ion binding;GO:0030001//metal ion transport;GO:0005737//cytoplasm;GO:0046916//cellular transition metal ion homeostasis
CL6758.Contig2_All	K09533//DnaJ homolog subfamily C member 13	XM_020309752.1 PREDICTED: Aegilops tauschii subsp. tauschii dnaJ homolog subfamily C GRV2 (LOC109750804), mRNA	dnaJ homolog subfamily C GRV2 [Aegilops tauschii subsp. tauschii]	Domain of unknown function (DUF4339)	DnaJ homolog subfamily C GRV2 OS=Arabidopsis thaliana GN=GRV2 PE=1 SV=1
CL617.Contig3_All		XM_003561652.3 PREDICTED: Brachypodium distachyon protein PNS1 (LOC100826409), mRNA	PREDICTED: protein PNS1 [Brachypodium distachyon] >KQK13932.1 hypothetical protein BRADI_1g13470 [Brachypodium distachyon]	Plasma-membrane choline transporter		GO:0016021//integral component of membrane
Unigene64628_All	K01180//endo-1,3(4)-beta-glucanase [EC:3.2.1.6];K13171//serine/arginine repetitive matrix protein 1+ko03015//mRNA surveillance pathway+ko03013//RNA transport;K04733//interleukin-1 receptor-associated kinase 4 [EC:2.7.11.1]	FP096005.1 Phyllostachys edulis cDNA clone: bphylf045d21, full insert sequence	PREDICTED: uncharacterized protein LOC100843817 [Brachypodium distachyon] >KQK13686.1 hypothetical protein BRADI_1g11837 [Brachypodium distachyon]	Protein of unknown function (DUF1517)	Proline-rich receptor-like protein kinase PERK9 OS=Arabidopsis thaliana GN=PERK9 PE=1 SV=1	GO:0016021//integral component of membrane;GO:0009507//chloroplast
Unigene13288_All	K14319//Ran GTPase-activating protein 1+ko03013//RNA transport	XM_003574457.3 PREDICTED: Brachypodium distachyon RAN GTPase-activating protein 2-like (LOC100822881), transcript variant X2, mRNA	PREDICTED: RAN GTPase-activating protein 2-like [Brachypodium distachyon] >XP_010235143.1 PREDICTED: RAN GTPase-activating protein 2-like [Brachypodium distachyon] >KQJ98352.1 hypothetical protein BRADI_3g36420 [Brachypodium distachyon] >KQJ98353.1 hypothetical protein BRADI_3g36420 [Brachypodium distachyon]	Leucine Rich repeat	RAN GTPase-activating protein 1 OS=Arabidopsis thaliana GN=RANGAP1 PE=1 SV=1
CL14128.Contig2_All	K11666//INO80 complex subunit B	AK369623.1 Hordeum vulgare subsp. vulgare mRNA for predicted protein, complete cds, clone: NIASHv2094J13	PAPA-1-like conserved region family protein 5B1a [Triticum aestivum]	PAPA-1-like conserved region
CL1815.Contig2_All		XM_003580456.3 PREDICTED: Brachypodium distachyon probable plastid-lipid-associated protein 8, chloroplastic (LOC100826936), mRNA	PREDICTED: probable plastid-lipid-associated protein 8, chloroplastic [Brachypodium distachyon]	PAP_fibrillin	Probable plastid-lipid-associated protein 8, chloroplastic OS=Arabidopsis thaliana GN=PAP8 PE=1 SV=1	GO:0009941//chloroplast envelope;GO:0009534//chloroplast thylakoid
Unigene46252_All	K20538//mitogen-activated protein kinase 8 [EC:2.7.11.24]+ko04016//MAPK signaling pathway - plant	XM_010232694.2 PREDICTED: Brachypodium distachyon mitogen-activated protein kinase 17-like (LOC100841823), mRNA	mitogen-activated protein kinase 17 isoform X1 [Aegilops tauschii subsp. tauschii]	Protein kinase domain	Mitogen-activated protein kinase 17 OS=Oryza sativa subsp. japonica GN=MPK17 PE=2 SV=2	GO:0010468//regulation of gene expression;GO:0005634//nucleus;GO:0005524//ATP binding;GO:0004707//MAP kinase activity;GO:0005737//cytoplasm
Unigene10277_All	K01285//lysosomal Pro-X carboxypeptidase [EC:3.4.16.2]	XM_003574135.3 PREDICTED: Brachypodium distachyon probable serine protease EDA2 (LOC100826990), mRNA	predicted protein [Hordeum vulgare subsp. vulgare]	Serine carboxypeptidase S28	Probable serine protease EDA2 OS=Arabidopsis thaliana GN=EDA2 PE=2 SV=2
CL10105.Contig6_All	K02889//large subunit ribosomal protein L21e+ko03010//Ribosome	XM_020308389.1 PREDICTED: Aegilops tauschii subsp. tauschii 60S ribosomal protein L21-1 (LOC109749422), mRNA	60S ribosomal protein L21-1 [Aegilops tauschii subsp. tauschii] >BAK01523.1 predicted protein [Hordeum vulgare subsp. vulgare] >EMT32592.1 60S ribosomal protein L21-2 [Aegilops tauschii]	Ribosomal protein L21e	60S ribosomal protein L21-2 OS=Arabidopsis thaliana GN=RPL21E PE=2 SV=1	GO:0006412//translation;GO:0022625//cytosolic large ribosomal subunit;GO:0003735//structural constituent of ribosome
CL207.Contig2_All	K21994//LOB domain-containing protein 18	FP092320.1 Phyllostachys edulis cDNA clone: bphyst014o09, full insert sequence	optic atrophy 3 protein homolog [Sorghum bicolor] >EES02156.1 hypothetical protein SORBI_3003G001200 [Sorghum bicolor]	Optic atrophy 3 protein (OPA3)	LOB domain-containing protein 2 OS=Arabidopsis thaliana GN=LBD2 PE=2 SV=2	GO:0019216//regulation of lipid metabolic process;GO:0005739//mitochondrion
CL10367.Contig2_All		XM_010237610.2 PREDICTED: Brachypodium distachyon uncharacterized LOC100825015 (LOC100825015), mRNA	PREDICTED: uncharacterized protein LOC100825015 [Brachypodium distachyon] >KQK01121.1 hypothetical protein BRADI_3g53950 [Brachypodium distachyon]	Phytosulfokine precursor protein (PSK)
Unigene61526_All		XM_003562969.3 PREDICTED: Brachypodium distachyon protein FATTY ACID EXPORT 6-like (LOC100846483), mRNA	predicted protein [Hordeum vulgare subsp. vulgare]	Transmembrane proteins 14C	Protein FATTY ACID EXPORT 6 OS=Arabidopsis thaliana GN=FAX6 PE=3 SV=1	GO:0016021//integral component of membrane
CL8837.Contig1_All	K14775//ribosome biogenesis protein UTP30	HG670306.1 Triticum aestivum chromosome 3B, genomic scaffold, cultivar Chinese Spring	unnamed protein product [Triticum aestivum]	Ribosomal protein L1p/L10e family	Proline-rich receptor-like protein kinase PERK2 OS=Arabidopsis thaliana GN=PERK2 PE=2 SV=3
CL5453.Contig3_All	K20547//basic endochitinase B [EC:3.2.1.14]+ko04016//MAPK signaling pathway - plant+ko00520//Amino sugar and nucleotide sugar metabolism+ko01100//Metabolic pathways;K11323//histone arginine demethylase JMJD6 [EC:1.14.11.-]	XM_010230207.2 PREDICTED: Brachypodium distachyon uncharacterized LOC104581762 (LOC104581762), mRNA	basic proline-rich protein-like [Sesamum indicum]	Cytochrome C biogenesis protein	Sulfated surface glycoprotein 185 OS=Volvox carteri PE=1 SV=1
CL3168.Contig9_All	K02335//DNA polymerase I [EC:2.7.7.7]+ko03420//Nucleotide excision repair+ko03030//DNA replication+ko03440//Homologous recombination+ko00230//Purine metabolism+ko03410//Base excision repair+ko01100//Metabolic pathways+ko00240//Pyrimidine metabolism	XM_003579314.3 PREDICTED: Brachypodium distachyon DNA polymerase I A, chloroplastic-like (LOC100823216), mRNA	PREDICTED: DNA polymerase I A, chloroplastic-like [Brachypodium distachyon] >KQJ84864.1 hypothetical protein BRADI_5g23367 [Brachypodium distachyon]	DNA polymerase family A	DNA polymerase I A, chloroplastic OS=Oryza sativa subsp. japonica GN=Os08g0175300 PE=2 SV=1	GO:0003887//DNA-directed DNA polymerase activity;GO:0003677//DNA binding;GO:0008409//5'-3' exonuclease activity;GO:0008408//3'-5' exonuclease activity;GO:0006261//DNA-dependent DNA replication;GO:0005737//cytoplasm
CL10247.Contig1_All	K15223//upstream activation factor subunit UAF30	XM_003574686.3 PREDICTED: Brachypodium distachyon mediator of RNA polymerase II transcription subunit 15 (LOC100842878), mRNA	PREDICTED: mediator of RNA polymerase II transcription subunit 15 [Brachypodium distachyon] >KQJ98889.1 hypothetical protein BRADI_3g39760 [Brachypodium distachyon]
CL7987.Contig6_All	K02920//large subunit ribosomal protein L36e+ko03010//Ribosome	FP092657.1 Phyllostachys edulis cDNA clone: bphyst026m01, full insert sequence	PREDICTED: 60S ribosomal protein L36-3 [Brachypodium distachyon] >KQK10513.1 hypothetical protein BRADI_2g54600 [Brachypodium distachyon]	Ribosomal protein L36e	60S ribosomal protein L36-3 OS=Arabidopsis thaliana GN=RPL36C PE=3 SV=1	GO:0003723//RNA binding;GO:0002181//cytoplasmic translation;GO:0022625//cytosolic large ribosomal subunit;GO:0003735//structural constituent of ribosome
CL45.Contig9_All	K12741//heterogeneous nuclear ribonucleoprotein A1/A3+ko03040//Spliceosome	XM_020320202.1 PREDICTED: Aegilops tauschii subsp. tauschii glycine-rich RNA-binding protein 10-like (LOC109761389), mRNA	pherophorin-dz1 protein [Volvox carteri f. nagariensis]	RNA recognition motif. (a.k.a. RRM, RBD, or RNP domain)	Glycine-rich RNA-binding protein 1 (Fragment) OS=Sorghum bicolor GN=GRP1 PE=2 SV=1
CL8161.Contig2_All	K07252//dolichyldiphosphatase [EC:3.6.1.43]+ko00510//N-Glycan biosynthesis	XM_003572810.3 PREDICTED: Brachypodium distachyon lipid phosphate phosphatase epsilon 2, chloroplastic-like (LOC100838102), transcript variant X1, mRNA	PREDICTED: lipid phosphate phosphatase epsilon 2, chloroplastic-like isoform X1 [Brachypodium distachyon] >KQK00928.1 hypothetical protein BRADI_3g52697 [Brachypodium distachyon]	PAP2 superfamily	Lipid phosphate phosphatase epsilon 2, chloroplastic OS=Arabidopsis thaliana GN=LPPE2 PE=1 SV=1	GO:0006651//diacylglycerol biosynthetic process;GO:0016021//integral component of membrane;GO:0008195//phosphatidate phosphatase activity;GO:0009507//chloroplast
Unigene65546_All
Unigene80096_All		XM_003575218.3 PREDICTED: Brachypodium distachyon uncharacterized LOC100825950 (LOC100825950), mRNA	PREDICTED: uncharacterized protein LOC100825950 [Brachypodium distachyon] >KQK00136.1 hypothetical protein BRADI_3g47520 [Brachypodium distachyon]	Folate receptor family		GO:0006979//response to oxidative stress;GO:0016021//integral component of membrane
Unigene31659_All		XR_001551297.1 PREDICTED: Oryza brachyantha uncharacterized LOC107305185 (LOC107305185), ncRNA
CL2621.Contig61_All	K12885//heterogeneous nuclear ribonucleoprotein G+ko03040//Spliceosome	XM_010229956.2 PREDICTED: Brachypodium distachyon glycine-rich RNA-binding protein RZ1C-like (LOC100823909), mRNA	glycine-rich RNA-binding protein RZ1C-like [Aegilops tauschii subsp. tauschii]	FAD binding domain	Probable D-2-hydroxyglutarate dehydrogenase, mitochondrial OS=Oryza sativa subsp. japonica GN=D2HGDH PE=3 SV=1	GO:0003723//RNA binding;GO:0008270//zinc ion binding
CL4851.Contig2_All	K13172//serine/arginine repetitive matrix protein 2	XM_020299450.1 PREDICTED: Aegilops tauschii subsp. tauschii putative transcription factor bHLH041 (LOC109740397), mRNA	putative transcription factor bHLH041 [Aegilops tauschii subsp. tauschii]	Helix-loop-helix DNA-binding domain	Anthocyanin regulatory R-S protein OS=Zea mays GN=R-S PE=2 SV=1
Unigene46287_All	K03006//DNA-directed RNA polymerase II subunit RPB1 [EC:2.7.7.6]+ko00230//Purine metabolism+ko03020//RNA polymerase+ko01100//Metabolic pathways+ko00240//Pyrimidine metabolism;K21952//CASK-interacting protein		basic proline-rich protein-like [Helianthus annuus] >OTG10782.1 putative root cap [Helianthus annuus]		Proline-rich receptor-like protein kinase PERK8 OS=Arabidopsis thaliana GN=PERK8 PE=1 SV=1
CL8683.Contig46_All	K10280//F-box and leucine-rich repeat protein 14;K10268//F-box and leucine-rich repeat protein 2/20	XM_010241785.2 PREDICTED: Brachypodium distachyon leucine-rich repeat-containing G-protein coupled receptor 4 (LOC100826929), transcript variant X2, mRNA	PREDICTED: leucine-rich repeat-containing G-protein coupled receptor 4 [Brachypodium distachyon] >XP_010240087.1 PREDICTED: leucine-rich repeat-containing G-protein coupled receptor 4 [Brachypodium distachyon] >KQJ83421.1 hypothetical protein BRADI_5g14870 [Brachypodium distachyon] >KQJ83422.1 hypothetical protein BRADI_5g14870 [Brachypodium distachyon] >KQJ83423.1 hypothetical protein BRADI_5g14…	Leucine rich repeat	F-box/LRR-repeat protein 10 OS=Arabidopsis thaliana GN=FBL10 PE=2 SV=1
CL2642.Contig1_All	K00876//uridine kinase [EC:2.7.1.48]+ko01100//Metabolic pathways+ko00240//Pyrimidine metabolism	XM_010237568.2 PREDICTED: Brachypodium distachyon uridine-cytidine kinase C-like (LOC100825306), transcript variant X2, mRNA	hypothetical protein BRADI_3g52910 [Brachypodium distachyon]	Phosphoribulokinase / Uridine kinase family	Phosphoribulokinase, chloroplastic OS=Mesembryanthemum crystallinum PE=2 SV=1	GO:0004849//uridine kinase activity;GO:0005524//ATP binding;GO:0016301//kinase activity;GO:0005829//cytosol;GO:0043097//pyrimidine nucleoside salvage;GO:0016021//integral component of membrane;GO:0006206//pyrimidine nucleobase metabolic process;GO:0009737//response to abscisic acid
CL1058.Contig42_All	K03542//photosystem II 22kDa protein+ko01100//Metabolic pathways+ko00195//Photosynthesis	XM_003564660.3 PREDICTED: Brachypodium distachyon photosystem II 22 kDa protein, chloroplastic (LOC100827756), mRNA	hypothetical protein TRIUR3_13970 [Triticum urartu]	Chlorophyll A-B binding protein	Photosystem II 22 kDa protein, chloroplastic OS=Solanum lycopersicum GN=PSBS PE=3 SV=1	GO:0055085//transmembrane transport;GO:0009535//chloroplast thylakoid membrane;GO:0016021//integral component of membrane
CL1136.Contig38_All		XM_014901050.1 PREDICTED: Brachypodium distachyon thylakoid lumenal 17.4 kDa protein, chloroplastic (LOC100841350), mRNA	PREDICTED: thylakoid lumenal 17.4 kDa protein, chloroplastic [Brachypodium distachyon] >KQJ97335.1 hypothetical protein BRADI_3g30150 [Brachypodium distachyon]	Pentapeptide repeats (9 copies)	Thylakoid lumenal 17.4 kDa protein, chloroplastic OS=Arabidopsis thaliana GN=TL17 PE=1 SV=2
CL1800.Contig1_All	K03695//ATP-dependent Clp protease ATP-binding subunit ClpB;K04733//interleukin-1 receptor-associated kinase 4 [EC:2.7.11.1]	XM_002440118.2 PREDICTED: Sorghum bicolor jacalin-related lectin 19 (LOC8068995), mRNA	jacalin-related lectin 19-like isoform X2 [Aegilops tauschii subsp. tauschii]	Jacalin-like lectin domain	Jacalin-related lectin 19 OS=Arabidopsis thaliana GN=JAL19 PE=2 SV=1
CL16820.Contig18_All	K17491//protein phosphatase 4 regulatory subunit 3	XM_006654007.2 PREDICTED: Oryza brachyantha serine/threonine-protein phosphatase 4 regulatory subunit 3B-like (LOC102699504), transcript variant X2, mRNA	PREDICTED: serine/threonine-protein phosphatase 4 regulatory subunit 3 isoform X2 [Oryza sativa Japonica Group]	PDE8 phosphodiesterase
Unigene6034_All		XM_020298053.1 PREDICTED: Aegilops tauschii subsp. tauschii CRS2-associated factor 2, chloroplastic (LOC109738964), mRNA	PREDICTED: CRS2-associated factor 2, chloroplastic [Brachypodium distachyon] >KQK04181.1 hypothetical protein BRADI_2g12140 [Brachypodium distachyon]	CRS1 / YhbY (CRM) domain	CRS2-associated factor 2, chloroplastic OS=Zea mays GN=CAF2 PE=1 SV=1	GO:0006397//mRNA processing;GO:0003723//RNA binding;GO:0030529//intracellular ribonucleoprotein complex;GO:0008380//RNA splicing;GO:0009570//chloroplast stroma
Unigene58186_All
Unigene22990_All	K02879//large subunit ribosomal protein L17+ko03010//Ribosome	XM_003568256.3 PREDICTED: Brachypodium distachyon 50S ribosomal protein L17-like (LOC100841328), mRNA	predicted protein [Hordeum vulgare subsp. vulgare]	Ribosomal protein L17	50S ribosomal protein L17, chloroplastic OS=Spinacia oleracea GN=RPL17 PE=1 SV=2
CL497.Contig11_All	K03327//multidrug resistance protein, MATE family	AK358243.1 Hordeum vulgare subsp. vulgare mRNA for predicted protein, complete cds, clone: NIASHv1071N14	protein DETOXIFICATION 16-like [Aegilops tauschii subsp. tauschii]	MatE	Protein DETOXIFICATION 16 OS=Arabidopsis thaliana GN=DTX16 PE=2 SV=1
Unigene54467_All
Unigene26620_All	K11838//ubiquitin carboxyl-terminal hydrolase 7 [EC:3.4.19.12]	XM_003577385.3 PREDICTED: Brachypodium distachyon ubiquitin carboxyl-terminal hydrolase 12-like (LOC100831891), transcript variant X2, mRNA	hypothetical protein BRADI_4g07167 [Brachypodium distachyon]	ICP0-binding domain of Ubiquitin-specific protease 7	Ubiquitin carboxyl-terminal hydrolase 12 OS=Arabidopsis thaliana GN=UBP12 PE=1 SV=2
Unigene61729_All		CP019102.1 Spirodela polyrhiza strain 9509 chromosome 10 sequence
CL4085.Contig4_All	K09015//Fe-S cluster assembly protein SufD	XM_010232099.2 PREDICTED: Brachypodium distachyon protein ABCI7, chloroplastic (LOC100825497), mRNA	hypothetical protein PAHAL_E03731 [Panicum hallii]	Uncharacterized protein family (UPF0051)	Formin-like protein 14 OS=Arabidopsis thaliana GN=FH14 PE=3 SV=3	GO:0016226//iron-sulfur cluster assembly;GO:0010027//thylakoid membrane organization;GO:0009793//embryo development ending in seed dormancy;GO:0009570//chloroplast stroma
CL2088.Contig7_All	K11343//MRG-binding protein	XM_015784632.1 PREDICTED: Oryza sativa Japonica Group uncharacterized LOC4339296 (LOC4339296), mRNA	uncharacterized protein LOC109751506 [Aegilops tauschii subsp. tauschii]	Chromatin modification-related protein EAF7		GO:0035267//NuA4 histone acetyltransferase complex;GO:0006357//regulation of transcription from RNA polymerase II promoter;GO:0006355//regulation of transcription, DNA-templated;GO:0043189//H4/H2A histone acetyltransferase complex;GO:0016573//histone acetylation
Unigene19573_All	K18693//diacylglycerol diphosphate phosphatase / phosphatidate phosphatase [EC:3.1.3.81 3.1.3.4]+ko01110//Biosynthesis of secondary metabolites+ko00564//Glycerophospholipid metabolism+ko00561//Glycerolipid metabolism;K20478//golgin subfamily B member 1	XM_010240265.2 PREDICTED: Brachypodium distachyon WEB family protein At5g55860 (LOC100835972), transcript variant X1, mRNA	PREDICTED: WEB family protein At5g55860 [Oryza brachyantha]	Weak chloroplast movement under blue light	WEB family protein At5g55860 OS=Arabidopsis thaliana GN=At5g55860 PE=1 SV=1	GO:0009904//chloroplast accumulation movement;GO:0005829//cytosol;GO:0009903//chloroplast avoidance movement
Unigene32444_All	K18592//gamma-glutamyltranspeptidase / glutathione hydrolase / leukotriene-C4 hydrolase [EC:2.3.2.2 3.4.19.13 3.4.19.14]+ko00430//Taurine and hypotaurine metabolism+ko00590//Arachidonic acid metabolism+ko01100//Metabolic pathways+ko00460//Cyanoamino acid metabolism+ko00480//Glutathione metabolism	XM_020335542.1 PREDICTED: Aegilops tauschii subsp. tauschii gamma-glutamyltranspeptidase 3-like (LOC109776875), mRNA	gamma-glutamyltranspeptidase 3-like [Aegilops tauschii subsp. tauschii]	Gamma-glutamyltranspeptidase	Glutathione hydrolase 3 OS=Arabidopsis thaliana GN=GGT3 PE=2 SV=1
CL12035.Contig4_All	K15455//diphthamide biosynthesis protein 3	XM_003559304.3 PREDICTED: Brachypodium distachyon uncharacterized LOC100825968 (LOC100825968), mRNA	PREDICTED: uncharacterized protein LOC100825968 [Brachypodium distachyon] >KQK12846.1 hypothetical protein BRADI_1g06360 [Brachypodium distachyon]	Protein of unknown function (DUF4237)
CL16476.Contig55_All	K20115//[pyruvate, phosphate dikinase]-phosphate phosphotransferase / [pyruvate, phosphate dikinase] kinase [EC:2.7.4.27 2.7.11.32]	AK354268.1 Hordeum vulgare subsp. vulgare mRNA for predicted protein, partial cds, clone: NIASHv1006C20	probable pyruvate, phosphate dikinase regulatory protein, chloroplastic isoform X2 [Aegilops tauschii subsp. tauschii]	Kinase/pyrophosphorylase	Probable pyruvate, phosphate dikinase regulatory protein, chloroplastic OS=Oryza sativa subsp. indica GN=PDRP1 PE=3 SV=1
CL8850.Contig6_All	K03030//26S proteasome regulatory subunit N11+ko03050//Proteasome	FP097559.1 Phyllostachys edulis cDNA clone: bphyst031o12, full insert sequence	PREDICTED: 26S proteasome non-ATPase regulatory subunit 14 homolog [Brachypodium distachyon] >KQK03811.1 hypothetical protein BRADI_2g09950 [Brachypodium distachyon]	JAB1/Mov34/MPN/PAD-1 ubiquitin protease	26S proteasome non-ATPase regulatory subunit 14 homolog OS=Arabidopsis thaliana GN=RPN11 PE=1 SV=1	GO:0061578//Lys63-specific deubiquitinase activity;GO:0000502//proteasome complex
CL8920.Contig9_All		AK360612.1 Hordeum vulgare subsp. vulgare mRNA for predicted protein, complete cds, clone: NIASHv1121O17	predicted protein [Hordeum vulgare subsp. vulgare]	Protein of unknown function (DUF1084)	Tobamovirus multiplication protein 1 OS=Arabidopsis thaliana GN=TOM1 PE=1 SV=1	GO:0009705//plant-type vacuole membrane;GO:0046786//viral replication complex formation and maintenance;GO:0016021//integral component of membrane
CL1890.Contig26_All	K07466//replication factor A1+ko03420//Nucleotide excision repair+ko03030//DNA replication+ko03440//Homologous recombination+ko03430//Mismatch repair		hypothetical protein BRADI_2g22915, partial [Brachypodium distachyon]	Replication factor-A C terminal domain
Unigene49198_All	K01179//endoglucanase [EC:3.2.1.4]+ko01100//Metabolic pathways+ko00500//Starch and sucrose metabolism	XR_001405214.1 PREDICTED: Brachypodium distachyon uncharacterized LOC100837332 (LOC100837332), transcript variant X2, misc_RNA	PREDICTED: endoglucanase 10 [Oryza brachyantha]	Plant specific mitochondrial import receptor subunit TOM20	Endoglucanase 10 OS=Oryza sativa subsp. japonica GN=GLU2 PE=2 SV=1	GO:0030245//cellulose catabolic process;GO:0016021//integral component of membrane;GO:0008810//cellulase activity
CL13427.Contig10_All	K13681//xyloglucan fucosyltransferase [EC:2.4.1.-]	AK360909.1 Hordeum vulgare subsp. vulgare mRNA for predicted protein, partial cds, clone: NIASHv1128C04	predicted protein, partial [Hordeum vulgare subsp. vulgare]	Xyloglucan fucosyltransferase	Galactoside 2-alpha-L-fucosyltransferase OS=Pisum sativum GN=FT1 PE=2 SV=1
Unigene38841_All
CL1725.Contig9_All	K17279//receptor expression-enhancing protein 5/6	XM_020323583.1 PREDICTED: Aegilops tauschii subsp. tauschii HVA22-like protein e (LOC109764803), mRNA	HVA22-like protein e [Aegilops tauschii subsp. tauschii]		HVA22-like protein d OS=Arabidopsis thaliana GN=HVA22D PE=2 SV=1	GO:0016021//integral component of membrane
Unigene71656_All		XM_010242246.2 PREDICTED: Brachypodium distachyon uncharacterized LOC100846879 (LOC100846879), transcript variant X1, mRNA	PREDICTED: uncharacterized protein LOC100846879 isoform X1 [Brachypodium distachyon]
Unigene30149_All	K14794//ribosomal RNA-processing protein 12	XM_003570651.3 PREDICTED: Brachypodium distachyon RRP12-like protein (LOC100822126), mRNA	PREDICTED: RRP12-like protein [Brachypodium distachyon] >KQK02054.1 hypothetical protein BRADI_3g60080 [Brachypodium distachyon]	NUC173 domain
Unigene21505_All	K21249//UV radiation resistance-associated gene protein	XM_003568534.3 PREDICTED: Brachypodium distachyon uncharacterized LOC100823061 (LOC100823061), transcript variant X2, mRNA	PREDICTED: uncharacterized protein LOC100823061 isoform X2 [Brachypodium distachyon] >KQK06612.1 hypothetical protein BRADI_2g27310 [Brachypodium distachyon] >KQK06613.1 hypothetical protein BRADI_2g27310 [Brachypodium distachyon]	Respiratory growth induced protein 1		GO:0009570//chloroplast stroma
Unigene38722_All	K00797//spermidine synthase [EC:2.5.1.16]+ko00410//beta-Alanine metabolism+ko00330//Arginine and proline metabolism+ko01100//Metabolic pathways+ko00270//Cysteine and methionine metabolism+ko00480//Glutathione metabolism	FP094751.1 Phyllostachys edulis cDNA clone: bphylf041c01, full insert sequence	PREDICTED: spermidine synthase 1 [Oryza sativa Japonica Group] >Q9SMB1.1 RecName: Full=Spermidine synthase 1; Short=SPDSY 1; AltName: Full=Putrescine aminopropyltransferase 1 >CAB61629.1 spermidine synthase 1 [Oryza sativa Japonica Group] >BAD30581.1 spermidine synthase 1 [Oryza sativa Japonica Group] >BAF21352.1 Os07g0408700 [Oryza sativa Japonica Group] >BAG87616.1 unnamed protein product [Oryz…	Spermine/spermidine synthase	Spermidine synthase 1 OS=Oryza sativa subsp. japonica GN=SPDSYN1 PE=2 SV=1	GO:0008295//spermidine biosynthetic process;GO:0004766//spermidine synthase activity;GO:0006596//polyamine biosynthetic process
Unigene40692_All	K10577//ubiquitin-conjugating enzyme E2 I+ko04120//Ubiquitin mediated proteolysis+ko03013//RNA transport	XM_003574209.3 PREDICTED: Brachypodium distachyon SUMO-conjugating enzyme SCE1 (LOC100823283), mRNA	hypothetical protein PAHAL_I04231, partial [Panicum hallii]	Ubiquitin-conjugating enzyme	SUMO-conjugating enzyme SCE1 OS=Arabidopsis thaliana GN=SCE1 PE=1 SV=1	GO:0005634//nucleus;GO:0005524//ATP binding;GO:0005737//cytoplasm;GO:0019789//SUMO transferase activity
CL2431.Contig9_All	K06670//cohesin complex subunit SCC1	XM_010234384.2 PREDICTED: Brachypodium distachyon sister chromatid cohesion 1 protein 4 (LOC100841414), mRNA	PREDICTED: sister chromatid cohesion 1 protein 4 [Oryza brachyantha]	N terminus of Rad21 / Rec8 like protein	Sister chromatid cohesion 1 protein 1 OS=Arabidopsis thaliana GN=SYN1 PE=2 SV=2	GO:0006302//double-strand break repair;GO:0000228//nuclear chromosome;GO:0007062//sister chromatid cohesion;GO:0003682//chromatin binding;GO:0000798//nuclear cohesin complex;GO:0070601//centromeric sister chromatid cohesion
CL10810.Contig4_All	K22020//mucin-19	XM_015782231.1 PREDICTED: Oryza sativa Japonica Group cation/H(+) antiporter 20 (LOC4337604), mRNA	PREDICTED: cation/H(+) antiporter 20 [Oryza sativa Japonica Group] >BAF16369.1 Os05g0113300 [Oryza sativa Japonica Group] >EAY96285.1 hypothetical protein OsI_18183 [Oryza sativa Indica Group] >BAS91946.1 Os05g0113300 [Oryza sativa Japonica Group]	Sodium/hydrogen exchanger family	Cation/H(+) antiporter 20 OS=Arabidopsis thaliana GN=CHX20 PE=2 SV=1	GO:0005783//endoplasmic reticulum;GO:0030104//water homeostasis;GO:0006885//regulation of pH;GO:0015299//solute:proton antiporter activity;GO:0012505//endomembrane system;GO:0030007//cellular potassium ion homeostasis;GO:0006623//protein targeting to vacuole;GO:0016021//integral component of membrane;GO:0015672//monovalent inorganic cation transport
CL15986.Contig44_All	K13436//pto-interacting protein 1 [EC:2.7.11.1]+ko04626//Plant-pathogen interaction	XM_003568938.3 PREDICTED: Brachypodium distachyon pto-interacting protein 1 (LOC100841529), transcript variant X1, mRNA	hypothetical protein BRADI_2g36980 [Brachypodium distachyon]	Protein tyrosine kinase	Pto-interacting protein 1 OS=Solanum lycopersicum GN=PTI1 PE=1 SV=2	GO:0005524//ATP binding;GO:0006468//protein phosphorylation;GO:0007166//cell surface receptor signaling pathway;GO:0004675//transmembrane receptor protein serine/threonine kinase activity;GO:0005886//plasma membrane
CL1505.Contig29_All	K00797//spermidine synthase [EC:2.5.1.16]+ko00410//beta-Alanine metabolism+ko00330//Arginine and proline metabolism+ko01100//Metabolic pathways+ko00270//Cysteine and methionine metabolism+ko00480//Glutathione metabolism	XM_010229336.2 PREDICTED: Brachypodium distachyon spermine synthase-like (LOC100831817), transcript variant X3, mRNA	PREDICTED: spermine synthase-like [Brachypodium distachyon] >XP_010227637.1 PREDICTED: spermine synthase-like [Brachypodium distachyon] >XP_010227638.1 PREDICTED: spermine synthase-like [Brachypodium distachyon] >XP_010227639.1 PREDICTED: spermine synthase-like [Brachypodium distachyon] >XP_014752641.1 PREDICTED: spermine synthase-like [Brachypodium distachyon] >KQK18091.1 hypothetical protein BR…	Spermine/spermidine synthase	Spermine synthase OS=Arabidopsis thaliana GN=SPMS PE=1 SV=1	GO:0004766//spermidine synthase activity;GO:0006596//polyamine biosynthetic process
CL6345.Contig7_All	K14007//protein transport protein SEC24+ko04141//Protein processing in endoplasmic reticulum;K14006//protein transport protein SEC23+ko04141//Protein processing in endoplasmic reticulum	XM_003579655.3 PREDICTED: Brachypodium distachyon protein transport protein SEC24-like (LOC100838050), mRNA	predicted protein [Hordeum vulgare subsp. vulgare]	Sec23/Sec24 trunk domain	Proline-rich receptor-like protein kinase PERK8 OS=Arabidopsis thaliana GN=PERK8 PE=1 SV=1	GO:0006886//intracellular protein transport;GO:0030127//COPII vesicle coat;GO:0008270//zinc ion binding;GO:0006888//ER to Golgi vesicle-mediated transport
CL5895.Contig3_All	K21952//CASK-interacting protein	XM_020336923.1 PREDICTED: Aegilops tauschii subsp. tauschii uncharacterized RNA methyltransferase BH0687 (LOC109778364), mRNA	uncharacterized protein LOC109778364 [Aegilops tauschii subsp. tauschii]	tRNA (Uracil-5-)-methyltransferase	Proline-rich receptor-like protein kinase PERK2 OS=Arabidopsis thaliana GN=PERK2 PE=2 SV=3
CL15641.Contig5_All	K20717//mitogen-activated protein kinase kinase kinase YODA [EC:2.7.11.25]+ko04016//MAPK signaling pathway - plant	XM_003580265.3 PREDICTED: Brachypodium distachyon mitogen-activated protein kinase kinase kinase YODA-like (LOC100844738), transcript variant X1, mRNA	PREDICTED: mitogen-activated protein kinase kinase kinase YODA-like [Brachypodium distachyon] >XP_010240238.1 PREDICTED: mitogen-activated protein kinase kinase kinase YODA-like [Brachypodium distachyon] >KQJ84015.1 hypothetical protein BRADI_5g18180 [Brachypodium distachyon]	Protein kinase domain	Mitogen-activated protein kinase kinase kinase YODA OS=Arabidopsis thaliana GN=YDA PE=1 SV=1	GO:0023014//signal transduction by protein phosphorylation;GO:0007346//regulation of mitotic cell cycle;GO:0005524//ATP binding;GO:0032147//activation of protein kinase activity;GO:0005737//cytoplasm;GO:0004674//protein serine/threonine kinase activity;GO:0004672//protein kinase activity;GO:0031098//stress-activated protein kinase signaling cascade
CL16595.Contig1_All	K14845//RAT1-interacting protein	XM_010236440.2 PREDICTED: Brachypodium distachyon pentatricopeptide repeat-containing protein At1g03100, mitochondrial (LOC100840932), transcript variant X1, mRNA	pentatricopeptide repeat-containing protein At1g03100, mitochondrial [Aegilops tauschii subsp. tauschii]		Pentatricopeptide repeat-containing protein At1g03100, mitochondrial OS=Arabidopsis thaliana GN=At1g03100 PE=2 SV=1	GO:0043231//intracellular membrane-bounded organelle;GO:0003723//RNA binding;GO:0009451//RNA modification;GO:0004519//endonuclease activity
CL9143.Contig1_All	K14838//nucleolar protein 15	FP091795.1 Phyllostachys edulis cDNA clone: bphyst004i24, full insert sequence	predicted protein [Hordeum vulgare subsp. vulgare]	RNA recognition motif. (a.k.a. RRM, RBD, or RNP domain)	Splicing factor-like protein 1 OS=Arabidopsis thaliana GN=SF1 PE=1 SV=1	GO:0003723//RNA binding;GO:0005730//nucleolus
CL6463.Contig6_All	K12872//pre-mRNA-splicing factor RBM22/SLT11+ko03040//Spliceosome	XM_003579951.3 PREDICTED: Brachypodium distachyon kelch domain-containing protein 4 (LOC100825989), transcript variant X2, mRNA	PREDICTED: kelch domain-containing protein 4 isoform X2 [Brachypodium distachyon] >KQJ83224.1 hypothetical protein BRADI_5g13770 [Brachypodium distachyon]	Galactose oxidase, central domain
CL9480.Contig3_All	K06947//polynucleotide 5'-hydroxyl-kinase GRC3/NOL9 [EC:2.7.1.-]	AK376320.1 Hordeum vulgare subsp. vulgare mRNA for predicted protein, complete cds, clone: NIASHv3120N09	hypothetical protein TRIUR3_10564 [Triticum urartu]	mRNA cleavage and polyadenylation factor CLP1 P-loop	Polynucleotide 5'-hydroxyl-kinase NOL9 OS=Arabidopsis thaliana GN=At5g11010 PE=2 SV=1	GO:0000448//cleavage in ITS2 between 5.8S rRNA and LSU-rRNA of tricistronic rRNA transcript (SSU-rRNA, 5.8S rRNA, LSU-rRNA);GO:0005634//nucleus;GO:0005524//ATP binding;GO:0051731//polynucleotide 5'-hydroxyl-kinase activity
CL6820.Contig4_All	K02947//small subunit ribosomal protein S10e+ko03010//Ribosome	XM_003565081.3 PREDICTED: Brachypodium distachyon 40S ribosomal protein S10 (LOC100825191), mRNA	PREDICTED: 40S ribosomal protein S10 [Brachypodium distachyon]	Plectin/S10 domain	40S ribosomal protein S10-2 OS=Oryza sativa subsp. japonica GN=RPS10-2 PE=2 SV=1	GO:0000028//ribosomal small subunit assembly;GO:0003723//RNA binding;GO:0003735//structural constituent of ribosome;GO:0022627//cytosolic small ribosomal subunit
CL12332.Contig4_All	K20368//protein cornichon	FP101572.1 Phyllostachys edulis cDNA clone: bphyem121b08, full insert sequence	PREDICTED: protein cornichon homolog 4 [Brachypodium distachyon] >KQK19958.1 hypothetical protein BRADI_1g51550 [Brachypodium distachyon] >KQK19959.1 hypothetical protein BRADI_1g51550 [Brachypodium distachyon] >KQK19960.1 hypothetical protein BRADI_1g51550 [Brachypodium distachyon]	Cornichon protein	Probable protein cornichon homolog 2 OS=Arabidopsis thaliana GN=At1g12340 PE=2 SV=2	GO:0006810//transport;GO:0016021//integral component of membrane
CL1744.Contig3_All	K13171//serine/arginine repetitive matrix protein 1+ko03015//mRNA surveillance pathway+ko03013//RNA transport;K14325//RNA-binding protein with serine-rich domain 1+ko03015//mRNA surveillance pathway+ko03013//RNA transport	AK332601.1 Triticum aestivum cDNA, clone: WT004_G08, cultivar: Chinese Spring	uncharacterized LOC100839725 [Brachypodium distachyon] >AJR27171.1 SnRK2-interacting calcium sensor,SCS [Brachypodium distachyon] >KQJ96356.1 hypothetical protein BRADI_3g22635 [Brachypodium distachyon]	EF-hand domain pair	Proline-rich receptor-like protein kinase PERK2 OS=Arabidopsis thaliana GN=PERK2 PE=2 SV=3	GO:0005509//calcium ion binding
CL3599.Contig25_All	K00030//isocitrate dehydrogenase (NAD+) [EC:1.1.1.41]+ko00020//Citrate cycle (TCA cycle)+ko01230//Biosynthesis of amino acids+ko01100//Metabolic pathways+ko01110//Biosynthesis of secondary metabolites+ko01210//2-Oxocarboxylic acid metabolism+ko01200//Carbon metabolism	FP096761.1 Phyllostachys edulis cDNA clone: bphylf047l09, full insert sequence	isocitrate dehydrogenase [NAD] catalytic subunit 5, mitochondrial-like [Aegilops tauschii subsp. tauschii] >EMS48397.1 Isocitrate dehydrogenase [NAD] catalytic subunit 5, mitochondrial [Triticum urartu] >EMT18974.1 Isocitrate dehydrogenase (NAD) catalytic subunit 5, mitochondrial [Aegilops tauschii]	Isocitrate/isopropylmalate dehydrogenase	Isocitrate dehydrogenase [NAD] catalytic subunit 5, mitochondrial OS=Arabidopsis thaliana GN=IDH5 PE=1 SV=1	GO:0006099//tricarboxylic acid cycle;GO:0000287//magnesium ion binding;GO:0004449//isocitrate dehydrogenase (NAD+) activity;GO:0051287//NAD binding;GO:0005739//mitochondrion
CL16495.Contig8_All
CL14811.Contig5_All	K04392//Ras-related C3 botulinum toxin substrate 1+ko04145//Phagosome+ko04933//AGE-RAGE signaling pathway in diabetic complications;K00430//peroxidase [EC:1.11.1.7]+ko01100//Metabolic pathways+ko01110//Biosynthesis of secondary metabolites+ko00940//Phenylpropanoid biosynthesis	XM_015771525.1 PREDICTED: Oryza sativa Japonica Group rac-like GTP-binding protein 5 (LOC4331272), mRNA	Rac-like GTP-binding protein 5 [Gossypium arboreum]	Ras family	Rac-like GTP-binding protein 5 OS=Oryza sativa subsp. japonica GN=RAC5 PE=2 SV=2	GO:0007264//small GTPase mediated signal transduction;GO:0005622//intracellular;GO:0016021//integral component of membrane;GO:0005525//GTP binding;GO:0003924//GTPase activity
CL120.Contig8_All		FP092289.1 Phyllostachys edulis cDNA clone: bphyem103o07, full insert sequence	uncharacterized protein At5g01610-like [Aegilops tauschii subsp. tauschii]	Protein of unknown function, DUF538	Uncharacterized protein At5g01610 OS=Arabidopsis thaliana GN=At5g01610 PE=1 SV=1
CL8410.Contig14_All	K14431//transcription factor TGA+ko04075//Plant hormone signal transduction	XM_003562599.3 PREDICTED: Brachypodium distachyon meiotically up-regulated gene 185 protein (LOC100838565), transcript variant X1, mRNA	PREDICTED: meiotically up-regulated gene 185 protein [Brachypodium distachyon] >KQK15112.1 hypothetical protein BRADI_1g20730 [Brachypodium distachyon] >KQK15113.1 hypothetical protein BRADI_1g20730 [Brachypodium distachyon]	Inner centromere protein, ARK binding region		GO:0009507//chloroplast
CL15077.Contig1_All		FP099129.1 Phyllostachys edulis cDNA clone: bphyst022h24, full insert sequence	PREDICTED: E2F-associated phosphoprotein [Oryza sativa Japonica Group] >EEE57438.1 hypothetical protein OsJ_07644 [Oryza sativa Japonica Group] >BAF09434.2 Os02g0635700 [Oryza sativa Japonica Group] >BAS79939.1 Os02g0635700 [Oryza sativa Japonica Group]	E2F-associated phosphoprotein		GO:0034243//regulation of transcription elongation from RNA polymerase II promoter;GO:0005634//nucleus;GO:0008284//positive regulation of cell proliferation
CL16790.Contig8_All	K04733//interleukin-1 receptor-associated kinase 4 [EC:2.7.11.1]	XM_003562897.3 PREDICTED: Brachypodium distachyon G-type lectin S-receptor-like serine/threonine-protein kinase B120 (LOC100825184), mRNA	PREDICTED: G-type lectin S-receptor-like serine/threonine-protein kinase B120 [Brachypodium distachyon] >KQK15837.1 hypothetical protein BRADI_1g25180 [Brachypodium distachyon]	Protein tyrosine kinase	G-type lectin S-receptor-like serine/threonine-protein kinase B120 OS=Arabidopsis thaliana GN=B120 PE=2 SV=1	GO:0004674//protein serine/threonine kinase activity;GO:0005524//ATP binding;GO:0048544//recognition of pollen;GO:0006468//protein phosphorylation;GO:0016021//integral component of membrane;GO:0005886//plasma membrane
CL7001.Contig4_All	K06638//mitotic spindle assembly checkpoint protein MAD1;K09291//nucleoprotein TPR+ko03013//RNA transport;K20283//golgin subfamily A member 4	XM_020327090.1 PREDICTED: Aegilops tauschii subsp. tauschii PX domain-containing protein EREL1 (LOC109768360), mRNA	PREDICTED: uncharacterized protein LOC100829573 [Brachypodium distachyon] >KQK16756.1 hypothetical protein BRADI_1g30410 [Brachypodium distachyon]	Formin Homology 2 Domain	PX domain-containing protein EREL2 OS=Arabidopsis thaliana GN=EREL2 PE=3 SV=1	GO:0035091//phosphatidylinositol binding
CL1446.Contig7_All	K10615//E3 ubiquitin-protein ligase HERC4 [EC:2.3.2.26]+ko04120//Ubiquitin mediated proteolysis;K10614//E3 ubiquitin-protein ligase HERC3 [EC:2.3.2.26]+ko04120//Ubiquitin mediated proteolysis	XM_003580706.2 PREDICTED: Brachypodium distachyon protein RCC2 (LOC100828048), mRNA	PREDICTED: protein RCC2 [Brachypodium distachyon] >KQJ85136.1 hypothetical protein BRADI_5g25080 [Brachypodium distachyon]	Regulator of chromosome condensation (RCC1) repeat	PH, RCC1 and FYVE domains-containing protein 1 OS=Arabidopsis thaliana GN=PRAF1 PE=1 SV=1	GO:0003677//DNA binding
CL5384.Contig3_All	K10450//kelch-like protein 12;K10443//kelch-like protein 2/3;K10446//kelch-like protein 8	CP018166.1 Oryza sativa Indica Group cultivar Shuhui498 chromosome 10 sequence	hypothetical protein OsI_33229 [Oryza sativa Indica Group]	Kelch motif	F-box/kelch-repeat protein At1g22040 OS=Arabidopsis thaliana GN=At1g22040 PE=2 SV=1
CL12779.Contig1_All	K15078//structure-specific endonuclease subunit SLX1 [EC:3.6.1.-]	FP095918.1 Phyllostachys edulis cDNA clone: bphylf061o03, full insert sequence	PREDICTED: structure-specific endonuclease subunit slx1-like [Setaria italica] >KQK99863.1 hypothetical protein SETIT_011227mg [Setaria italica]	GIY-YIG catalytic domain	Chitin-binding lectin 1 OS=Solanum tuberosum PE=1 SV=2
CL1688.Contig6_All	K13717//OTU domain-containing protein 3 [EC:3.4.19.12]	XM_010242287.2 PREDICTED: Brachypodium distachyon OTU domain-containing protein 3 (LOC100838441), transcript variant X1, mRNA	PREDICTED: OTU domain-containing protein 3 isoform X1 [Brachypodium distachyon] >KQJ85210.1 hypothetical protein BRADI_5g25650 [Brachypodium distachyon]	OTU-like cysteine protease
CL9991.Contig4_All
Unigene42601_All
CL527.Contig1_All	K05747//Wiskott-Aldrich syndrome protein+ko04144//Endocytosis;K02184//formin 2	XM_003567791.3 PREDICTED: Brachypodium distachyon protein CHUP1, chloroplastic (LOC100830416), mRNA	PREDICTED: protein CHUP1, chloroplastic [Brachypodium distachyon] >KQK04739.1 hypothetical protein BRADI_2g15630 [Brachypodium distachyon]	TATA element modulatory factor 1 TATA binding	Protein CHUP1, chloroplastic OS=Arabidopsis thaliana GN=CHUP1 PE=1 SV=1	GO:0009707//chloroplast outer membrane;GO:0009658//chloroplast organization
Unigene41637_All	K01191//alpha-mannosidase [EC:3.2.1.24]+ko00511//Other glycan degradation	AK362870.1 Hordeum vulgare subsp. vulgare mRNA for predicted protein, complete cds, clone: NIASHv2010M03	hypothetical protein BRADI_1g52520 [Brachypodium distachyon]	Protein of unknown function (DUF1644)
CL3122.Contig2_All	K21026//acetylajmaline esterase [EC:3.1.1.80]+ko00901//Indole alkaloid biosynthesis+ko01110//Biosynthesis of secondary metabolites	FP096495.1 Phyllostachys edulis cDNA clone: bphylf032k05, full insert sequence	PREDICTED: GDSL esterase/lipase At5g45910 [Oryza sativa Japonica Group]	GDSL-like Lipase/Acylhydrolase	Sinapine esterase OS=Brassica napus PE=1 SV=1	GO:0016788//hydrolase activity, acting on ester bonds
CL9846.Contig2_All	K02184//formin 2	FP092768.1 Phyllostachys edulis cDNA clone: bphylf040d18, full insert sequence	PREDICTED: uncharacterized protein LOC100825394 [Brachypodium distachyon] >KQK10933.1 hypothetical protein BRADI_2g57120 [Brachypodium distachyon]		Formin-like protein 5 OS=Oryza sativa subsp. japonica GN=FH5 PE=2 SV=2	GO:0016021//integral component of membrane
Unigene54430_All	K11275//histone H1/5	FP093673.1 Phyllostachys edulis cDNA clone: bphyst015m21, full insert sequence	DNA-binding protein [Avena sativa]	linker histone H1 and H5 family	HMG-Y-related protein A OS=Zea mays GN=HMGIY2 PE=1 SV=1
CL9043.Contig6_All	K13172//serine/arginine repetitive matrix protein 2	XM_003581583.3 PREDICTED: Brachypodium distachyon protein starmaker (LOC100822512), mRNA	protein starmaker-like [Aegilops tauschii subsp. tauschii]	cwf21 domain	WD40 repeat-containing protein HOS15 OS=Arabidopsis thaliana GN=HOS15 PE=2 SV=1
CL3847.Contig4_All	K19907//synaptotagmin-7;K19938//rabphilin-3A	XM_010236262.2 PREDICTED: Brachypodium distachyon synaptotagmin-5-like (LOC100823592), mRNA	PREDICTED: synaptotagmin-5-like [Brachypodium distachyon]	C2 domain	Synaptotagmin-4 OS=Arabidopsis thaliana GN=SYT4 PE=2 SV=1	GO:0008289//lipid binding
CL10107.Contig2_All	K10666//E3 ubiquitin-protein ligase RNF5 [EC:2.3.2.27]+ko04141//Protein processing in endoplasmic reticulum;K16275//E3 ubiquitin-protein ligase BAH [EC:2.3.2.27];K10683//BRCA1-associated RING domain protein 1+ko03440//Homologous recombination	XM_010237414.2 PREDICTED: Brachypodium distachyon E3 ubiquitin-protein ligase PRT1 (LOC100834226), mRNA	PREDICTED: E3 ubiquitin-protein ligase PRT1 [Brachypodium distachyon] >KQK00384.1 hypothetical protein BRADI_3g49030 [Brachypodium distachyon]	zinc finger of C3HC4-type, RING	E3 ubiquitin-protein ligase PRT1 OS=Arabidopsis thaliana GN=PRT1 PE=2 SV=2	GO:0061630//ubiquitin protein ligase activity;GO:0071596//ubiquitin-dependent protein catabolic process via the N-end rule pathway;GO:0043161//proteasome-mediated ubiquitin-dependent protein catabolic process;GO:0008270//zinc ion binding
CL15549.Contig2_All	K22020//mucin-19		hypothetical protein BU14_0546s0009 [Porphyra umbilicalis]
CL1984.Contig79_All	K11093//U1 small nuclear ribonucleoprotein 70kDa+ko03040//Spliceosome	DQ019633.1 Triticum aestivum U1 snRNP-interacting 70 kDa protein (U1-70K) mRNA, complete cds	PREDICTED: U1 small nuclear ribonucleoprotein 70 kDa-like [Brachypodium distachyon] >KQJ97386.1 hypothetical protein BRADI_3g30430 [Brachypodium distachyon]	U1 small nuclear ribonucleoprotein of 70kDa MW N terminal	U1 small nuclear ribonucleoprotein 70 kDa OS=Arabidopsis thaliana GN=RNU1 PE=1 SV=1	GO:0005685//U1 snRNP;GO:0003729//mRNA binding;GO:0071004//U2-type prespliceosome;GO:0000398//mRNA splicing, via spliceosome;GO:0030619//U1 snRNA binding;GO:0071011//precatalytic spliceosome;GO:0000243//commitment complex
CL7242.Contig4_All	K04733//interleukin-1 receptor-associated kinase 4 [EC:2.7.11.1];K01180//endo-1,3(4)-beta-glucanase [EC:3.2.1.6]	AK335634.1 Triticum aestivum cDNA, clone: WT013_G12, cultivar: Chinese Spring	PREDICTED: ankyrin repeat and SAM domain-containing protein 6 [Oryza sativa Japonica Group] >XP_015631148.1 PREDICTED: ankyrin repeat and SAM domain-containing protein 6 [Oryza sativa Japonica Group] >AAO20060.1 hypothetical protein [Oryza sativa Japonica Group] >AAO37953.1 hypothetical protein [Oryza sativa Japonica Group] >ABF99916.1 SAM domain family protein, expressed [Oryza sativa Japonica G…	SAM domain (Sterile alpha motif)	Proline-rich receptor-like protein kinase PERK2 OS=Arabidopsis thaliana GN=PERK2 PE=2 SV=3
Unigene15561_All	K11517//(S)-2-hydroxy-acid oxidase [EC:1.1.3.15]+ko04146//Peroxisome+ko01100//Metabolic pathways+ko01110//Biosynthesis of secondary metabolites+ko01200//Carbon metabolism+ko00630//Glyoxylate and dicarboxylate metabolism	XM_010238826.2 PREDICTED: Brachypodium distachyon asparagine synthetase domain-containing protein 1 (LOC100834970), mRNA	hypothetical protein BRADI_4g03827 [Brachypodium distachyon]	Asparagine synthase	Peroxisomal (S)-2-hydroxy-acid oxidase GLO1 OS=Oryza sativa subsp. indica GN=GLO1 PE=3 SV=1
CL1137.Contig4_All	K14945//protein quaking	FP095880.1 Phyllostachys edulis cDNA clone: bphylf048g05, full insert sequence	KH domain-containing protein At5g56140-like isoform X2 [Aegilops tauschii subsp. tauschii]	Homodimerisation region of STAR domain protein	KH domain-containing protein At5g56140 OS=Arabidopsis thaliana GN=At5g56140 PE=2 SV=1	GO:0003723//RNA binding
Unigene59910_All	K14638//solute carrier family 15 (peptide/histidine transporter), member 3/4	XM_010230807.2 PREDICTED: Brachypodium distachyon protein NRT1/ PTR FAMILY 8.3-like (LOC100833145), mRNA	PREDICTED: protein NRT1/ PTR FAMILY 8.3-like [Brachypodium distachyon] >KQK23355.1 hypothetical protein BRADI_1g72910 [Brachypodium distachyon]	POT family	Protein NRT1/ PTR FAMILY 8.3 OS=Arabidopsis thaliana GN=NPF8.3 PE=1 SV=1	GO:0016021//integral component of membrane;GO:0005215//transporter activity
CL3249.Contig21_All	K12891//splicing factor, arginine/serine-rich 2+ko03040//Spliceosome	XM_003562643.3 PREDICTED: Brachypodium distachyon serine/arginine-rich splicing factor SC35 (LOC100826320), transcript variant X1, mRNA	serine/arginine-rich splicing factor SC35-like isoform X1 [Sorghum bicolor]	RNA recognition motif. (a.k.a. RRM, RBD, or RNP domain)	Serine/arginine-rich splicing factor SC35 OS=Arabidopsis thaliana GN=SC35 PE=1 SV=1	GO:0003723//RNA binding
Unigene11643_All	K07937//ADP-ribosylation factor 1+ko04144//Endocytosis;K07977//Arf/Sar family, other	FP094899.1 Phyllostachys edulis cDNA clone: bphyst007b07, full insert sequence	hypothetical protein PAHAL_B01372 [Panicum hallii]	ADP-ribosylation factor family	ADP-ribosylation factor 1 OS=Arabidopsis thaliana GN=ARF1 PE=1 SV=2
CL4043.Contig9_All	K14445//solute carrier family 13 (sodium-dependent dicarboxylate transporter), member 2/3/5	XM_020332151.1 PREDICTED: Aegilops tauschii subsp. tauschii tonoplast dicarboxylate transporter-like (LOC109773456), mRNA	PREDICTED: tonoplast dicarboxylate transporter-like [Brachypodium distachyon] >KQJ90730.1 hypothetical protein BRADI_4g33550 [Brachypodium distachyon]	Sodium:sulfate symporter transmembrane region	Tonoplast dicarboxylate transporter OS=Arabidopsis thaliana GN=TDT PE=2 SV=2	GO:0055085//transmembrane transport;GO:0016021//integral component of membrane;GO:0006814//sodium ion transport;GO:0098656//anion transmembrane transport;GO:0005215//transporter activity
CL1172.Contig14_All	K02184//formin 2	XM_020329912.1 PREDICTED: Aegilops tauschii subsp. tauschii F-box protein At1g70590 (LOC109771220), mRNA	F-box protein At1g70590 [Aegilops tauschii subsp. tauschii]	Sel1 repeat	Leucine-rich repeat extensin-like protein 5 OS=Arabidopsis thaliana GN=LRX5 PE=2 SV=2
CL2289.Contig2_All	K02969//small subunit ribosomal protein S20e+ko03010//Ribosome	AK426474.1 Brachypodium distachyon mRNA, clone: PL016C01-A-014_J17	PREDICTED: 40S ribosomal protein S20 [Brachypodium distachyon] >KQK19982.1 hypothetical protein BRADI_1g51650 [Brachypodium distachyon]	Ribosomal protein S10p/S20e	40S ribosomal protein S20 OS=Oryza sativa subsp. japonica GN=RPS20 PE=2 SV=2	GO:0002181//cytoplasmic translation;GO:0003735//structural constituent of ribosome;GO:0022627//cytosolic small ribosomal subunit
CL3611.Contig2_All	K04733//interleukin-1 receptor-associated kinase 4 [EC:2.7.11.1];K00276//primary-amine oxidase [EC:1.4.3.21]+ko00410//beta-Alanine metabolism+ko00960//Tropane, piperidine and pyridine alkaloid biosynthesis+ko00350//Tyrosine metabolism+ko01100//Metabolic pathways+ko00950//Isoquinoline alkaloid biosynthesis+ko01110//Biosynthesis of secondary metabolites+ko00260//Glycine, serine and threonine metabo…	XM_014901600.1 PREDICTED: Brachypodium distachyon uncharacterized LOC100840440 (LOC100840440), mRNA	PREDICTED: uncharacterized protein LOC100840440 [Brachypodium distachyon] >KQJ96110.1 hypothetical protein BRADI_3g21060 [Brachypodium distachyon]	Armadillo/beta-catenin-like repeat	U-box domain-containing protein 13 OS=Arabidopsis thaliana GN=PUB13 PE=1 SV=1	GO:0005634//nucleus;GO:0005737//cytoplasm
CL581.Contig7_All	K01069//hydroxyacylglutathione hydrolase [EC:3.1.2.6]+ko00620//Pyruvate metabolism	XM_003578395.3 PREDICTED: Brachypodium distachyon probable hydroxyacylglutathione hydrolase 2, chloroplastic (LOC100832703), mRNA	PREDICTED: probable hydroxyacylglutathione hydrolase 2, chloroplastic [Brachypodium distachyon] >KQJ91053.1 hypothetical protein BRADI_4g35270 [Brachypodium distachyon]	Hydroxyacylglutathione hydrolase C-terminus	Probable hydroxyacylglutathione hydrolase 2, chloroplastic OS=Arabidopsis thaliana GN=GLX2-4 PE=2 SV=1	GO:0004416//hydroxyacylglutathione hydrolase activity;GO:0019243//methylglyoxal catabolic process to D-lactate via S-lactoyl-glutathione
CL2631.Contig2_All		AC253904.1 Aquilegia coerulea clone COL06-M12, complete sequence	hypothetical protein TSUD_59450 [Trifolium subterraneum]	Atrophin-1 family
CL3191.Contig27_All	K15363//fanconi-associated nuclease 1 [EC:3.1.21.- 3.1.4.1]	XM_010229677.2 PREDICTED: Brachypodium distachyon fanconi-associated nuclease 1 homolog (LOC100841714), transcript variant X4, mRNA	fanconi-associated nuclease 1 homolog isoform X2 [Aegilops tauschii subsp. tauschii]	VRR-NUC domain	Fanconi-associated nuclease 1 homolog OS=Oryza sativa subsp. japonica GN=Os06g0171800 PE=3 SV=1	GO:0003677//DNA binding;GO:0008270//zinc ion binding;GO:0016818//hydrolase activity, acting on acid anhydrides, in phosphorus-containing anhydrides;GO:0036297//interstrand cross-link repair;GO:0004518//nuclease activity
Unigene35120_All		XM_003565565.3 PREDICTED: Brachypodium distachyon pentatricopeptide repeat-containing protein At5g56310-like (LOC100843144), mRNA	unnamed protein product [Triticum aestivum]
Unigene31722_All	K08202//MFS transporter, OCT family, solute carrier family 22 (organic cation transporter), member 4/5	KC508601.1 Triticum aestivum copper transporter (CT1-5A) mRNA, complete cds	PREDICTED: organic cation/carnitine transporter 7-like [Brachypodium distachyon] >KQK14046.1 hypothetical protein BRADI_1g14040 [Brachypodium distachyon]	Sugar (and other) transporter	Organic cation/carnitine transporter 7 OS=Arabidopsis thaliana GN=OCT7 PE=2 SV=1	GO:0016021//integral component of membrane
Unigene65457_All		XR_001404671.1 PREDICTED: Brachypodium distachyon protein ROOT PRIMORDIUM DEFECTIVE 1 (LOC100843536), transcript variant X1, misc_RNA	hypothetical protein TRIUR3_13877 [Triticum urartu]	Plant organelle RNA recognition domain	Protein ROOT PRIMORDIUM DEFECTIVE 1 OS=Arabidopsis thaliana GN=RPD1 PE=1 SV=1
CL3906.Contig34_All	K03252//translation initiation factor 3 subunit C+ko03013//RNA transport;K13172//serine/arginine repetitive matrix protein 2;K22020//mucin-19	FP098730.1 Phyllostachys edulis cDNA clone: bphylf025l07, full insert sequence	hypothetical protein PAHAL_E00573 [Panicum hallii]	Protein of unknown function (DUF707)	Alpha-amylase isozyme C OS=Oryza sativa subsp. indica GN=AMYC PE=3 SV=2	GO:0016021//integral component of membrane
CL16253.Contig36_All	K04382//serine/threonine-protein phosphatase 2A catalytic subunit [EC:3.1.3.16]+ko04136//Autophagy - other+ko03015//mRNA surveillance pathway	FP095146.1 Phyllostachys edulis cDNA clone: bphylf034p20, full insert sequence	serine/threonine-protein phosphatase PP2A-4 catalytic subunit isoform X2 [Aegilops tauschii subsp. tauschii] >ABO16371.1 serine/threonine-protein phosphatase PP2A-1 catalytic subunit [Triticum aestivum]	Calcineurin-like phosphoesterase	Serine/threonine-protein phosphatase PP2A-4 catalytic subunit OS=Oryza sativa subsp. japonica GN=PP2A4 PE=2 SV=2
Unigene37737_All	K10046//GDP-D-mannose 3', 5'-epimerase [EC:5.1.3.18 5.1.3.-]+ko00520//Amino sugar and nucleotide sugar metabolism+ko01100//Metabolic pathways+ko00053//Ascorbate and aldarate metabolism+ko01110//Biosynthesis of secondary metabolites	XM_010236432.2 PREDICTED: Brachypodium distachyon GDP-mannose 3,5-epimerase 1 (LOC100826361), transcript variant X4, mRNA	PREDICTED: GDP-mannose 3,5-epimerase 1 isoform X3 [Brachypodium distachyon] >XP_010234734.1 PREDICTED: GDP-mannose 3,5-epimerase 1 isoform X3 [Brachypodium distachyon] >KQJ96731.1 hypothetical protein BRADI_3g26860 [Brachypodium distachyon] >KQJ96735.1 hypothetical protein BRADI_3g26860 [Brachypodium distachyon] >KQJ96736.1 hypothetical protein BRADI_3g26860 [Brachypodium distachyon]	NAD dependent epimerase/dehydratase family	GDP-mannose 3,5-epimerase 1 OS=Oryza sativa subsp. japonica GN=GME-1 PE=1 SV=1	GO:0047918//GDP-mannose 3,5-epimerase activity;GO:0051287//NAD binding
CL6058.Contig1_All	K13510//lysophosphatidylcholine acyltransferase / lyso-PAF acetyltransferase [EC:2.3.1.23 2.3.1.67]+ko01100//Metabolic pathways+ko00564//Glycerophospholipid metabolism+ko00565//Ether lipid metabolism	XM_020315758.1 PREDICTED: Aegilops tauschii subsp. tauschii lysophospholipid acyltransferase LPEAT1-like (LOC109756914), transcript variant X5, mRNA	PREDICTED: lysophospholipid acyltransferase LPEAT1-like isoform X2 [Brachypodium distachyon] >KQK04105.1 hypothetical protein BRADI_2g11730 [Brachypodium distachyon] >KQK04106.1 hypothetical protein BRADI_2g11730 [Brachypodium distachyon]	Acyltransferase	Lysophospholipid acyltransferase LPEAT1 OS=Arabidopsis thaliana GN=LPEAT1 PE=1 SV=1	GO:0008152//metabolic process;GO:0016746//transferase activity, transferring acyl groups;GO:0016021//integral component of membrane
CL7136.Contig4_All	K05681//ATP-binding cassette, subfamily G (WHITE), member 2+ko02010//ABC transporters;K21396//ATP-binding cassette, subfamily G (WHITE), eye pigment precursor transporter	XM_020325067.1 PREDICTED: Aegilops tauschii subsp. tauschii ABC transporter G family member 36 (LOC109766302), mRNA	ABC transporter G family member 36 [Aegilops tauschii subsp. tauschii]	ABC-2 type transporter	ABC transporter G family member 36 OS=Oryza sativa subsp. japonica GN=ABCG36 PE=2 SV=1	GO:0005524//ATP binding;GO:0042626//ATPase activity, coupled to transmembrane movement of substances;GO:0016021//integral component of membrane;GO:0005886//plasma membrane
Unigene20328_All	K12448//UDP-arabinose 4-epimerase [EC:5.1.3.5]+ko00520//Amino sugar and nucleotide sugar metabolism+ko01100//Metabolic pathways	XM_003568238.3 PREDICTED: Brachypodium distachyon metal tolerance protein 5-like (LOC100835712), mRNA	metal tolerance protein 5-like [Aegilops tauschii subsp. tauschii]	Cation efflux family	Metal tolerance protein 5 OS=Oryza sativa subsp. japonica GN=MTP5 PE=2 SV=1	GO:0005774//vacuolar membrane;GO:0016021//integral component of membrane;GO:0008324//cation transmembrane transporter activity
CL5393.Contig2_All	K13179//ATP-dependent RNA helicase DDX18/HAS1 [EC:3.6.4.13]	XM_003577321.3 PREDICTED: Brachypodium distachyon DEAD-box ATP-dependent RNA helicase 50 (LOC100838222), mRNA	DEAD-box ATP-dependent RNA helicase 50-like [Aegilops tauschii subsp. tauschii]	DEAD/DEAH box helicase	DEAD-box ATP-dependent RNA helicase 50 OS=Oryza sativa subsp. japonica GN=Os03g0108600 PE=2 SV=2	GO:0009817//defense response to fungus, incompatible interaction;GO:0005524//ATP binding;GO:0006968//cellular defense response;GO:0071446//cellular response to salicylic acid stimulus;GO:0071395//cellular response to jasmonic acid stimulus;GO:0003676//nucleic acid binding;GO:0004004//ATP-dependent RNA helicase activity;GO:0009507//chloroplast;GO:0071369//cellular response to ethylene stimulus
CL14071.Contig2_All	K16903//L-tryptophan---pyruvate aminotransferase [EC:2.6.1.99]+ko00380//Tryptophan metabolism+ko01100//Metabolic pathways	FP093087.1 Phyllostachys edulis cDNA clone: bphyem210n20, full insert sequence	predicted protein [Hordeum vulgare subsp. vulgare]	Allinase	Tryptophan aminotransferase-related protein 2 OS=Arabidopsis thaliana GN=TAR2 PE=2 SV=1
Unigene24403_All	K08266//target of rapamycin complex subunit LST8+ko04136//Autophagy - other	XM_003565014.3 PREDICTED: Brachypodium distachyon protein LST8 homolog (LOC100830609), mRNA	PREDICTED: protein LST8 homolog [Brachypodium distachyon] >KQK11533.1 hypothetical protein BRADI_2g60690 [Brachypodium distachyon]	WD domain, G-beta repeat	Transcription initiation factor TFIID subunit 5 OS=Arabidopsis thaliana GN=TAF5 PE=1 SV=1	GO:0031929//TOR signaling;GO:0031931//TORC1 complex;GO:0031932//TORC2 complex;GO:0032956//regulation of actin cytoskeleton organization
CL6665.Contig9_All	K00962//polyribonucleotide nucleotidyltransferase [EC:2.7.7.8]+ko00230//Purine metabolism+ko03018//RNA degradation+ko00240//Pyrimidine metabolism	XM_003557487.3 PREDICTED: Brachypodium distachyon probable polyribonucleotide nucleotidyltransferase 1, chloroplastic (LOC100824934), mRNA	PREDICTED: probable polyribonucleotide nucleotidyltransferase 1, chloroplastic [Brachypodium distachyon] >KQK20721.1 hypothetical protein BRADI_1g56280 [Brachypodium distachyon]	3' exoribonuclease family, domain 1	Probable polyribonucleotide nucleotidyltransferase 1, chloroplastic OS=Oryza sativa subsp. japonica GN=PNP1 PE=2 SV=1	GO:0016123//xanthophyll biosynthetic process;GO:0006397//mRNA processing;GO:0016036//cellular response to phosphate starvation;GO:0003723//RNA binding;GO:0004654//polyribonucleotide nucleotidyltransferase activity;GO:0006364//rRNA processing;GO:0000175//3'-5'-exoribonuclease activity;GO:0008033//tRNA processing;GO:0006402//mRNA catabolic process;GO:0010323//negative regulation of isopentenyl diph…
CL164.Contig10_All	K07937//ADP-ribosylation factor 1+ko04144//Endocytosis	XM_020292550.1 PREDICTED: Aegilops tauschii subsp. tauschii ADP-ribosylation factor 1-like (LOC109733349), mRNA	PREDICTED: ADP-ribosylation factor 1 [Solanum tuberosum] >XP_006344798.1 PREDICTED: ADP-ribosylation factor 1 [Solanum tuberosum] >XP_011087517.1 ADP-ribosylation factor 1-like [Sesamum indicum] >XP_015163051.1 PREDICTED: ADP-ribosylation factor 1 [Solanum tuberosum]	Ribosomal protein S24e	ADP-ribosylation factor 1 OS=Arabidopsis thaliana GN=ARF1 PE=1 SV=2
CL2219.Contig2_All		XM_014903261.1 PREDICTED: Brachypodium distachyon uncharacterized LOC100825161 (LOC100825161), transcript variant X4, mRNA	hypothetical protein BRADI_4g03303 [Brachypodium distachyon]	Williams-Beuren syndrome DDT (WSD), D-TOX E motif	Homeobox-DDT domain protein RLT3 OS=Arabidopsis thaliana GN=RLT3 PE=3 SV=1	GO:0003677//DNA binding;GO:0005634//nucleus
CL13587.Contig23_All	K13606//chlorophyll(ide) b reductase [EC:1.1.1.294]+ko00860//Porphyrin and chlorophyll metabolism+ko01100//Metabolic pathways+ko01110//Biosynthesis of secondary metabolites	XM_015772788.1 PREDICTED: Oryza sativa Japonica Group chlorophyll(ide) b reductase NOL, chloroplastic (LOC4333604), transcript variant X2, mRNA	PREDICTED: chlorophyll(ide) b reductase NOL, chloroplastic [Brachypodium distachyon]	short chain dehydrogenase	Chlorophyll(ide) b reductase NOL, chloroplastic OS=Oryza sativa subsp. japonica GN=NOL PE=1 SV=1	GO:0010304//PSII associated light-harvesting complex II catabolic process;GO:0034256//chlorophyll(ide) b reductase activity;GO:0015996//chlorophyll catabolic process;GO:0009507//chloroplast
CL2558.Contig2_All	K02884//large subunit ribosomal protein L19+ko03010//Ribosome	XM_020329619.1 PREDICTED: Aegilops tauschii subsp. tauschii 50S ribosomal protein L19, chloroplastic-like (LOC109770904), transcript variant X1, mRNA	50S ribosomal protein L19, chloroplastic [Aegilops tauschii]	Ribosomal protein L19	50S ribosomal protein L19, chloroplastic OS=Spinacia oleracea GN=RPL19 PE=1 SV=2	GO:0005840//ribosome;GO:0006412//translation;GO:0003735//structural constituent of ribosome
CL7176.Contig2_All		CT829293.1 Oryza sativa (indica cultivar-group) cDNA clone:OSIGCSN032E08, full insert sequence	PREDICTED: transmembrane protein 50 homolog [Brachypodium distachyon] >KQJ99974.1 hypothetical protein BRADI_3g46397 [Brachypodium distachyon]			GO:0016021//integral component of membrane
CL5168.Contig11_All	K03032//26S proteasome regulatory subunit N2+ko03050//Proteasome	XM_003580461.3 PREDICTED: Brachypodium distachyon 26S proteasome non-ATPase regulatory subunit 1 homolog A-like (LOC100828654), mRNA	PREDICTED: 26S proteasome non-ATPase regulatory subunit 1 homolog A-like [Brachypodium distachyon] >KQJ84467.1 hypothetical protein BRADI_5g21080 [Brachypodium distachyon]	Proteasome/cyclosome repeat	26S proteasome non-ATPase regulatory subunit 1 homolog A OS=Arabidopsis thaliana GN=RPN2A PE=1 SV=1	GO:0005634//nucleus;GO:0000502//proteasome complex;GO:0030234//enzyme regulator activity;GO:0034515//proteasome storage granule;GO:0043161//proteasome-mediated ubiquitin-dependent protein catabolic process;GO:0042176//regulation of protein catabolic process;GO:0016021//integral component of membrane;GO:0008540//proteasome regulatory particle, base subcomplex
CL12748.Contig100_All	K14782//protein AATF/BFR2	XM_003568928.3 PREDICTED: Brachypodium distachyon putative uncharacterized protein DDB_G0270496 (LOC100838475), mRNA	protein AATF-like isoform X1 [Aegilops tauschii subsp. tauschii]		Proline-rich receptor-like protein kinase PERK2 OS=Arabidopsis thaliana GN=PERK2 PE=2 SV=3	GO:0005730//nucleolus
CL9139.Contig1_All		FP100525.1 Phyllostachys edulis cDNA clone: bphyst022j08, full insert sequence	PREDICTED: uncharacterized protein LOC4334803 isoform X2 [Oryza sativa Japonica Group] >ABF99931.1 SnRK1-interacting protein 1, putative, expressed [Oryza sativa Japonica Group] >BAF13829.1 Os03g0851500 [Oryza sativa Japonica Group] >BAS87389.1 Os03g0851500 [Oryza sativa Japonica Group]		DNA repair RAD52-like protein 2, chloroplastic OS=Arabidopsis thaliana GN=RAD52-2 PE=2 SV=1
CL8761.Contig10_All	K07200//5'-AMP-activated protein kinase, regulatory gamma subunit	XM_010233653.2 PREDICTED: Brachypodium distachyon SNF1-related protein kinase regulatory subunit gamma-1-like (LOC100828193), transcript variant X1, mRNA	SNF1-related protein kinase regulatory subunit gamma 1 [Triticum urartu]	CBS domain	SNF1-related protein kinase regulatory subunit gamma-1-like OS=Arabidopsis thaliana GN=CBSCBS2 PE=1 SV=1	GO:0003824//catalytic activity
Unigene12568_All	K13447//respiratory burst oxidase [EC:1.6.3.- 1.11.1.-]+ko04016//MAPK signaling pathway - plant+ko04626//Plant-pathogen interaction;K13343//peroxin-14+ko04146//Peroxisome;K18195//rhamnogalacturonan endolyase [EC:4.2.2.23]		uncharacterized protein LOC109733718 [Aegilops tauschii subsp. tauschii]	Reverse transcriptase (RNA-dependent DNA polymerase)	Putative ribonuclease H protein At1g65750 OS=Arabidopsis thaliana GN=At1g65750 PE=3 SV=1
CL7937.Contig10_All	K21797//phosphatidylinositol 4-phosphatase [EC:3.1.3.-]+ko01100//Metabolic pathways+ko04070//Phosphatidylinositol signaling system+ko00562//Inositol phosphate metabolism	XM_003558613.3 PREDICTED: Brachypodium distachyon phosphoinositide phosphatase SAC2 (LOC100833209), mRNA	PREDICTED: phosphoinositide phosphatase SAC2 [Brachypodium distachyon] >KQK23291.1 hypothetical protein BRADI_1g72490 [Brachypodium distachyon]	SacI homology domain	Phosphoinositide phosphatase SAC2 OS=Arabidopsis thaliana GN=SAC2 PE=2 SV=1	GO:0007033//vacuole organization;GO:0036092//phosphatidylinositol-3-phosphate biosynthetic process;GO:0042578//phosphoric ester hydrolase activity
CL16834.Contig11_All	K10589//ubiquitin-protein ligase E3 C [EC:2.3.2.26]+ko04120//Ubiquitin mediated proteolysis	XM_020309948.1 PREDICTED: Aegilops tauschii subsp. tauschii E3 ubiquitin-protein ligase UPL6 (LOC109751036), transcript variant X1, mRNA	PREDICTED: E3 ubiquitin-protein ligase UPL6 isoform X2 [Brachypodium distachyon]	HECT-domain (ubiquitin-transferase)	E3 ubiquitin-protein ligase UPL6 OS=Arabidopsis thaliana GN=UPL6 PE=2 SV=1	GO:0061630//ubiquitin protein ligase activity;GO:0005737//cytoplasm;GO:0004842//ubiquitin-protein transferase activity
CL16531.Contig3_All	K13171//serine/arginine repetitive matrix protein 1+ko03015//mRNA surveillance pathway+ko03013//RNA transport;K13172//serine/arginine repetitive matrix protein 2;K04733//interleukin-1 receptor-associated kinase 4 [EC:2.7.11.1]	AJ251050.1 Avena fatua mRNA for VIP1 protein (vip1 gene)	PREDICTED: uncharacterized protein LOC100831432 [Brachypodium distachyon]		Formin-like protein 14 OS=Arabidopsis thaliana GN=FH14 PE=3 SV=3	GO:0016021//integral component of membrane
CL15838.Contig2_All		FP099708.1 Phyllostachys edulis cDNA clone: bphyst030g23, full insert sequence	F-box protein At5g39250 [Aegilops tauschii subsp. tauschii] >XP_020164494.1 F-box protein At5g39250 [Aegilops tauschii subsp. tauschii]	F-box-like	F-box protein At5g39250 OS=Arabidopsis thaliana GN=At5g39250 PE=2 SV=1	GO:0043161//proteasome-mediated ubiquitin-dependent protein catabolic process;GO:0000151//ubiquitin ligase complex
Unigene26532_All	K17781//mitochondrial import inner membrane translocase subunit TIM13	XM_003570062.3 PREDICTED: Brachypodium distachyon mitochondrial import inner membrane translocase subunit Tim13 (LOC100823472), mRNA	PREDICTED: mitochondrial import inner membrane translocase subunit Tim13 [Oryza sativa Japonica Group] >Q9XGY5.2 RecName: Full=Mitochondrial import inner membrane translocase subunit Tim13 >BAD27835.1 putative mitochondrial import inner membrane translocase subunit Tim13 [Oryza sativa Japonica Group] >BAF09666.1 Os02g0682600 [Oryza sativa Japonica Group] >EAZ24197.1 hypothetical protein OsJ_07945…		Mitochondrial import inner membrane translocase subunit Tim13 OS=Oryza sativa subsp. japonica GN=TIM13 PE=3 SV=2	GO:0046872//metal ion binding;GO:0005507//copper ion binding;GO:0008565//protein transporter activity;GO:0072321//chaperone-mediated protein transport;GO:0045039//protein import into mitochondrial inner membrane;GO:0042719//mitochondrial intermembrane space protein transporter complex
CL3597.Contig1_All	K22733//magnesium transporter;K17710//pentatricopeptide repeat domain-containing protein 1	XM_003572813.3 PREDICTED: Brachypodium distachyon putative pentatricopeptide repeat-containing protein At3g01580 (LOC100839009), mRNA	putative pentatricopeptide repeat-containing protein At3g01580 [Aegilops tauschii subsp. tauschii]	PPR repeat family	Pentatricopeptide repeat-containing protein At2g03380, mitochondrial OS=Arabidopsis thaliana GN=PCMP-E47 PE=3 SV=1
CL2953.Contig4_All	K15170//mediator of RNA polymerase II transcription subunit 27	XM_020334183.1 PREDICTED: Aegilops tauschii subsp. tauschii mediator of RNA polymerase II transcription subunit 27 (LOC109775437), mRNA	mediator of RNA polymerase II transcription subunit 27 [Aegilops tauschii subsp. tauschii]	Mediator complex subunit 27	Mediator of RNA polymerase II transcription subunit 27 OS=Arabidopsis thaliana GN=MED27 PE=1 SV=1	GO:0016592//mediator complex
CL8727.Contig3_All	K13459//disease resistance protein RPS2+ko04626//Plant-pathogen interaction	XM_020297064.1 PREDICTED: Aegilops tauschii subsp. tauschii uncharacterized LOC109737949 (LOC109737949), mRNA	PREDICTED: putative disease resistance protein At1g63350 [Brachypodium distachyon]	Leucine Rich repeats (2 copies)	Putative disease resistance protein At1g63350 OS=Arabidopsis thaliana GN=At1g63350 PE=3 SV=1
CL1547.Contig12_All	K13173//arginine and glutamate-rich protein 1	AK362517.1 Hordeum vulgare subsp. vulgare mRNA for predicted protein, partial cds, clone: NIASHv2006L01	uncharacterized protein At1g10890 isoform X1 [Aegilops tauschii subsp. tauschii]	Arginine and glutamate-rich 1	Uncharacterized protein At1g10890 OS=Arabidopsis thaliana GN=At1g10890 PE=4 SV=1
CL9532.Contig2_All	K07735//putative transcriptional regulator	XM_003564747.3 PREDICTED: Brachypodium distachyon uncharacterized LOC100828069 (LOC100828069), mRNA	PREDICTED: uncharacterized protein LOC100828069 [Brachypodium distachyon] >KQK10946.1 hypothetical protein BRADI_2g57210 [Brachypodium distachyon]	Uncharacterized ACR, COG1678
Unigene65744_All	K22683//aspartyl protease family protein [EC:3.4.23.-];K01381//saccharopepsin [EC:3.4.23.25]	XM_020321918.1 PREDICTED: Aegilops tauschii subsp. tauschii aspartic proteinase nepenthesin-1-like (LOC109763048), mRNA	aspartic proteinase nepenthesin-1-like [Aegilops tauschii subsp. tauschii]	Xylanase inhibitor N-terminal	Aspartic proteinase nepenthesin-1 OS=Nepenthes gracilis GN=nep1 PE=1 SV=1	GO:0006508//proteolysis;GO:0030163//protein catabolic process;GO:0004190//aspartic-type endopeptidase activity
CL1082.Contig37_All	K20177//vacuolar protein sorting-associated protein 3	XM_003562493.3 PREDICTED: Brachypodium distachyon methyltransferase-like protein 13 (LOC100832111), mRNA	PREDICTED: methyltransferase-like protein 13 [Brachypodium distachyon] >KQK14884.1 hypothetical protein BRADI_1g19240 [Brachypodium distachyon]	Methyltransferase domain		GO:0008168//methyltransferase activity
CL4559.Contig6_All	K06236//collagen, type I, alpha+ko04933//AGE-RAGE signaling pathway in diabetic complications;K14491//two-component response regulator ARR-B family+ko04075//Plant hormone signal transduction	XM_010230376.2 PREDICTED: Brachypodium distachyon protein PHR1-LIKE 1-like (LOC100833923), mRNA	PREDICTED: protein PHR1-LIKE 1-like [Brachypodium distachyon] >KQK21857.1 hypothetical protein BRADI_1g63530 [Brachypodium distachyon] >KQK21858.1 hypothetical protein BRADI_1g63530 [Brachypodium distachyon]	Myb-like DNA-binding domain	Protein PHOSPHATE STARVATION RESPONSE 1 OS=Oryza sativa subsp. indica GN=PHR1 PE=3 SV=1	GO:0003677//DNA binding;GO:0005634//nucleus;GO:0006355//regulation of transcription, DNA-templated;GO:0006351//transcription, DNA-templated
CL9346.Contig9_All	K05012//chloride channel 3/4/5	XM_020315370.1 PREDICTED: Aegilops tauschii subsp. tauschii chloride channel protein CLC-f-like (LOC109756509), mRNA	PREDICTED: chloride channel protein CLC-f [Brachypodium distachyon] >KQJ98826.1 hypothetical protein BRADI_3g39350 [Brachypodium distachyon]	Voltage gated chloride channel	Chloride channel protein CLC-f OS=Arabidopsis thaliana GN=CLC-F PE=2 SV=2	GO:0005794//Golgi apparatus;GO:0005247//voltage-gated chloride channel activity;GO:0016021//integral component of membrane;GO:0009507//chloroplast
CL2100.Contig7_All	K02184//formin 2	XM_010236936.2 PREDICTED: Brachypodium distachyon uncharacterized LOC100843369 (LOC100843369), mRNA	uncharacterized protein LOC109780295 [Aegilops tauschii subsp. tauschii]	Methyl-CpG binding domain	Vegetative cell wall protein gp1 OS=Chlamydomonas reinhardtii GN=GP1 PE=1 SV=1	GO:0003677//DNA binding;GO:0005634//nucleus
Unigene54425_All
Unigene41959_All	K21437//ankyrin repeat domain-containing protein 13	XM_015771152.1 PREDICTED: Oryza sativa Japonica Group ankyrin repeat domain-containing protein 13C-B-like (LOC107276732), mRNA	PREDICTED: ankyrin repeat domain-containing protein 13C isoform X1 [Brachypodium distachyon] >KQK01283.1 hypothetical protein BRADI_3g54910 [Brachypodium distachyon]	GPCR-chaperone	Leucine-rich repeat extensin-like protein 5 OS=Arabidopsis thaliana GN=LRX5 PE=2 SV=2	GO:0005886//plasma membrane;GO:0005737//cytoplasm
CL12901.Contig5_All	K05666//ATP-binding cassette, subfamily C (CFTR/MRP), member 2+ko02010//ABC transporters	XM_003558788.3 PREDICTED: Brachypodium distachyon ABC transporter C family member 13 (LOC100834959), mRNA	ABC transporter C family MRP4 [Sorghum bicolor] >OQU93255.1 hypothetical protein SORBI_3001G508200 [Sorghum bicolor]	ABC transporter transmembrane region	ABC transporter C family MRP4 OS=Zea mays GN=MRP4 PE=2 SV=1	GO:0055085//transmembrane transport;GO:0005524//ATP binding;GO:1901527//abscisic acid-activated signaling pathway involved in stomatal movement;GO:0042626//ATPase activity, coupled to transmembrane movement of substances;GO:0008281//sulfonylurea receptor activity;GO:0005774//vacuolar membrane;GO:0030007//cellular potassium ion homeostasis;GO:0009651//response to salt stress;GO:0016021//integral c…
CL9455.Contig8_All	K20361//intracellular protein transport protein USO1;K21248//vacuole membrane protein 1	XM_003575654.3 PREDICTED: Brachypodium distachyon golgin candidate 6 (LOC100832173), mRNA	PREDICTED: golgin candidate 6 [Brachypodium distachyon] >KQJ86453.1 hypothetical protein BRADI_4g05600 [Brachypodium distachyon]	Uso1 / p115 like vesicle tethering protein, C terminal region	Golgin candidate 6 OS=Arabidopsis thaliana GN=GC6 PE=1 SV=2	GO:0005783//endoplasmic reticulum;GO:0032527//protein exit from endoplasmic reticulum;GO:0008565//protein transporter activity;GO:0048211//Golgi vesicle docking;GO:0000139//Golgi membrane;GO:0005795//Golgi stack;GO:0006886//intracellular protein transport;GO:0061025//membrane fusion;GO:0048280//vesicle fusion with Golgi apparatus;GO:0009791//post-embryonic development;GO:0005829//cytosol;GO:00068…
Unigene1740_All	K10704//ubiquitin-conjugating enzyme E2 variant	XM_003577905.3 PREDICTED: Brachypodium distachyon ubiquitin-conjugating enzyme E2 variant 1C (LOC100837317), mRNA	ubiquitin-conjugating enzyme E2 variant 1C [Aegilops tauschii subsp. tauschii]	Ubiquitin-conjugating enzyme	Ubiquitin-conjugating enzyme E2 variant 1C OS=Arabidopsis thaliana GN=UEV1C PE=1 SV=1	GO:0070534//protein K63-linked ubiquitination;GO:0061630//ubiquitin protein ligase activity;GO:0005634//nucleus;GO:0031625//ubiquitin protein ligase binding;GO:0005737//cytoplasm;GO:0006301//postreplication repair
CL2448.Contig12_All	K00703//starch synthase [EC:2.4.1.21]+ko01100//Metabolic pathways+ko00500//Starch and sucrose metabolism+ko01110//Biosynthesis of secondary metabolites	XM_003567981.3 PREDICTED: Brachypodium distachyon probable starch synthase 4, chloroplastic/amyloplastic (LOC100836636), mRNA	PREDICTED: probable starch synthase 4, chloroplastic/amyloplastic [Brachypodium distachyon] >KQK05227.1 hypothetical protein BRADI_2g18810 [Brachypodium distachyon]	Starch synthase catalytic domain	Probable starch synthase 4, chloroplastic/amyloplastic OS=Arabidopsis thaliana GN=SS4 PE=2 SV=1	GO:0019252//starch biosynthetic process;GO:0004373//glycogen (starch) synthase activity;GO:0009501//amyloplast;GO:0009011//starch synthase activity;GO:0009507//chloroplast
CL1136.Contig27_All	K18412//trinucleotide repeat-containing gene 6 protein	XM_020327210.1 PREDICTED: Aegilops tauschii subsp. tauschii zinc finger CCCH domain-containing protein 36-like (LOC109768492), mRNA	zinc finger CCCH domain-containing protein 36-like [Aegilops tauschii subsp. tauschii]	SRI (Set2 Rpb1 interacting) domain	Zinc finger CCCH domain-containing protein 36 OS=Oryza sativa subsp. japonica GN=Os05g0497500 PE=4 SV=1
CL6498.Contig3_All	K11343//MRG-binding protein	AK375721.1 Hordeum vulgare subsp. vulgare mRNA for predicted protein, complete cds, clone: NIASHv3102H04	uncharacterized protein LOC109751506 [Aegilops tauschii subsp. tauschii]			GO:0035267//NuA4 histone acetyltransferase complex;GO:0006357//regulation of transcription from RNA polymerase II promoter;GO:0006355//regulation of transcription, DNA-templated;GO:0043189//H4/H2A histone acetyltransferase complex;GO:0016573//histone acetylation
CL6718.Contig10_All	K02603//origin recognition complex subunit 1	XM_003578025.3 PREDICTED: Brachypodium distachyon protein polybromo-1-like (LOC100823715), mRNA	predicted protein [Hordeum vulgare subsp. vulgare]	BAH domain	Chromatin remodeling protein EBS OS=Arabidopsis thaliana GN=EBS PE=1 SV=1	GO:0006342//chromatin silencing;GO:0046872//metal ion binding;GO:0003682//chromatin binding;GO:0000785//chromatin;GO:0031507//heterochromatin assembly;GO:0000976//transcription regulatory region sequence-specific DNA binding;GO:0005677//chromatin silencing complex
Unigene13425_All
CL14485.Contig2_All	K04733//interleukin-1 receptor-associated kinase 4 [EC:2.7.11.1]	XM_003570341.3 PREDICTED: Brachypodium distachyon haloacid dehalogenase-like hydrolase domain-containing protein At2g33255 (LOC100829806), transcript variant X1, mRNA	haloacid dehalogenase-like hydrolase domain-containing protein At2g33255 isoform X1 [Aegilops tauschii subsp. tauschii] >XP_020149159.1 haloacid dehalogenase-like hydrolase domain-containing protein At2g33255 isoform X2 [Aegilops tauschii subsp. tauschii]	Haloacid dehalogenase-like hydrolase	Haloacid dehalogenase-like hydrolase domain-containing protein At2g33255 OS=Arabidopsis thaliana GN=At2g33255 PE=1 SV=1	GO:0016311//dephosphorylation;GO:0016791//phosphatase activity;GO:0009507//chloroplast
CL5958.Contig1_All	K10863//aprataxin [EC:3.1.11.7 3.1.11.8 3.1.12.2];K16189//phytochrome-interacting factor 4+ko04075//Plant hormone signal transduction;K12126//phytochrome-interacting factor 3+ko04712//Circadian rhythm - plant+ko04075//Plant hormone signal transduction	HG670306.1 Triticum aestivum chromosome 3B, genomic scaffold, cultivar Chinese Spring	transcription factor SPATULA-like isoform X2 [Aegilops tauschii subsp. tauschii]	Helix-loop-helix DNA-binding domain	Transcription factor HEC2 OS=Arabidopsis thaliana GN=HEC2 PE=1 SV=1	GO:0046983//protein dimerization activity
Unigene9972_All	K00058//D-3-phosphoglycerate dehydrogenase / 2-oxoglutarate reductase [EC:1.1.1.95 1.1.1.399]+ko01230//Biosynthesis of amino acids+ko01100//Metabolic pathways+ko00260//Glycine, serine and threonine metabolism+ko01200//Carbon metabolism	FP092121.1 Phyllostachys edulis cDNA clone: bphyem205c24, full insert sequence	D-3-phosphoglycerate dehydrogenase 1, chloroplastic-like [Aegilops tauschii subsp. tauschii]		D-3-phosphoglycerate dehydrogenase 3, chloroplastic OS=Arabidopsis thaliana GN=PGDH3 PE=1 SV=1	GO:0006564//L-serine biosynthetic process;GO:0051287//NAD binding;GO:0004617//phosphoglycerate dehydrogenase activity
Unigene36989_All	K05768//gelsolin	XM_010241881.2 PREDICTED: Brachypodium distachyon villin-4-like (LOC100828345), transcript variant X3, mRNA	PREDICTED: villin-4-like isoform X3 [Brachypodium distachyon] >KQK16918.1 hypothetical protein BRADI_1g31417 [Brachypodium distachyon]	Villin headpiece domain	Villin-3 OS=Oryza sativa subsp. japonica GN=VLN3 PE=2 SV=2	GO:0051015//actin filament binding;GO:0051592//response to calcium ion;GO:0007015//actin filament organization;GO:0051693//actin filament capping;GO:0032432//actin filament bundle;GO:0051014//actin filament severing
CL16445.Contig26_All		XM_003574473.3 PREDICTED: Brachypodium distachyon GDT1-like protein 5 (LOC100828112), transcript variant X1, mRNA	PREDICTED: GDT1-like protein 5 isoform X1 [Brachypodium distachyon] >KQJ98393.1 hypothetical protein BRADI_3g36630 [Brachypodium distachyon]	Uncharacterized protein family UPF0016	GDT1-like protein 5 OS=Oryza sativa subsp. japonica GN=Os08g0433100 PE=2 SV=1	GO:0016021//integral component of membrane
CL7737.Contig10_All	K03257//translation initiation factor 4A+ko03013//RNA transport	XM_020294141.1 PREDICTED: Aegilops tauschii subsp. tauschii protein FLX-like 1 (LOC109734951), transcript variant X2, mRNA	PREDICTED: protein FLX-like 1 [Brachypodium distachyon] >KQJ83165.1 hypothetical protein BRADI_5g13480 [Brachypodium distachyon]	Ciliary protein causing Leber congenital amaurosis disease	Protein FLX-like 4 OS=Arabidopsis thaliana GN=FLXL4 PE=1 SV=1
CL13534.Contig1_All	K02882//large subunit ribosomal protein L18Ae+ko03010//Ribosome	AK333571.1 Triticum aestivum cDNA, clone: WT006_M22, cultivar: Chinese Spring	PREDICTED: 60S ribosomal protein L18a-like protein [Oryza sativa Japonica Group] >EEE64705.1 hypothetical protein OsJ_19560 [Oryza sativa Japonica Group]	Protein of unknown function (DUF3040)	60S ribosomal protein L18a-like protein OS=Arabidopsis thaliana GN=At1g29970 PE=2 SV=2	GO:0016021//integral component of membrane
CL1714.Contig1_All	K07052//uncharacterized protein	XM_014900612.1 PREDICTED: Brachypodium distachyon uncharacterized LOC100825844 (LOC100825844), transcript variant X4, mRNA	predicted protein [Hordeum vulgare subsp. vulgare]			GO:0016021//integral component of membrane
CL1698.Contig11_All		XM_003564246.3 PREDICTED: Brachypodium distachyon uncharacterized LOC100829468 (LOC100829468), mRNA	PREDICTED: uncharacterized protein LOC100829468 [Brachypodium distachyon] >KQK19512.1 hypothetical protein BRADI_1g48730 [Brachypodium distachyon]	Glyoxalase/Bleomycin resistance protein/Dioxygenase superfamily
CL238.Contig14_All		XM_003560708.3 PREDICTED: Brachypodium distachyon uncharacterized LOC100830682 (LOC100830682), mRNA	PREDICTED: uncharacterized protein LOC101767176 [Setaria italica]	Protein of unknown function (DUF1295)		GO:0016627//oxidoreductase activity, acting on the CH-CH group of donors;GO:0016021//integral component of membrane;GO:0005737//cytoplasm;GO:0006629//lipid metabolic process
CL5146.Contig8_All	K02836//peptide chain release factor 2	XM_020339138.1 PREDICTED: Aegilops tauschii subsp. tauschii peptide chain release factor PrfB3, chloroplastic (LOC109780551), mRNA	peptide chain release factor PrfB3, chloroplastic [Aegilops tauschii subsp. tauschii]	PCRF domain	Peptide chain release factor PrfB3, chloroplastic OS=Arabidopsis thaliana GN=PRFB3 PE=2 SV=1	GO:0043565//sequence-specific DNA binding;GO:0043488//regulation of mRNA stability;GO:0009658//chloroplast organization;GO:0003730//mRNA 3'-UTR binding;GO:0003747//translation release factor activity;GO:0009570//chloroplast stroma
CL465.Contig59_All		FP098378.1 Phyllostachys edulis cDNA clone: bphyem204a05, full insert sequence	hypothetical protein F775_06870 [Aegilops tauschii]			GO:0016787//hydrolase activity;GO:0009507//chloroplast
CL1970.Contig11_All	K01001//UDP-N-acetylglucosamine--dolichyl-phosphate N-acetylglucosaminephosphotransferase [EC:2.7.8.15]+ko00510//N-Glycan biosynthesis+ko01100//Metabolic pathways	XM_003562468.3 PREDICTED: Brachypodium distachyon UDP-N-acetylglucosamine--dolichyl-phosphate N-acetylglucosaminephosphotransferase (LOC100824570), mRNA	PREDICTED: UDP-N-acetylglucosamine--dolichyl-phosphate N-acetylglucosaminephosphotransferase [Brachypodium distachyon] >KQK14823.1 hypothetical protein BRADI_1g18800 [Brachypodium distachyon]	Glycosyl transferase family 4		GO:0003975//UDP-N-acetylglucosamine-dolichyl-phosphate N-acetylglucosaminephosphotransferase activity;GO:0006489//dolichyl diphosphate biosynthetic process;GO:0006487//protein N-linked glycosylation;GO:0016021//integral component of membrane;GO:0005789//endoplasmic reticulum membrane;GO:0008963//phospho-N-acetylmuramoyl-pentapeptide-transferase activity
CL6427.Contig6_All	K14554//U3 small nucleolar RNA-associated protein 21+ko03008//Ribosome biogenesis in eukaryotes	XM_003563261.3 PREDICTED: Brachypodium distachyon U3 small nucleolar RNA-associated protein 21 homolog (LOC100833468), mRNA	PREDICTED: U3 small nucleolar RNA-associated protein 21 homolog [Brachypodium distachyon] >KQK16785.1 hypothetical protein BRADI_1g30580 [Brachypodium distachyon]	Utp21 specific WD40 associated putative domain	Pre-mRNA-processing factor 19 homolog 2 OS=Arabidopsis thaliana GN=PRP19B PE=1 SV=3	GO:0034388//Pwp2p-containing subcomplex of 90S preribosome;GO:0032040//small-subunit processome;GO:0006364//rRNA processing
CL16214.Contig17_All	K03100//signal peptidase I [EC:3.4.21.89]+ko03060//Protein export	XM_003558908.3 PREDICTED: Brachypodium distachyon uncharacterized LOC100845632 (LOC100845632), transcript variant X1, mRNA	PREDICTED: uncharacterized protein LOC100845632 [Brachypodium distachyon] >KQK13031.1 hypothetical protein BRADI_1g07570 [Brachypodium distachyon]	Signal peptidase, peptidase S26	Thylakoidal processing peptidase 1, chloroplastic OS=Arabidopsis thaliana GN=TPP1 PE=2 SV=2	GO:0016021//integral component of membrane;GO:0008236//serine-type peptidase activity
Unigene2794_All		AK248655.1 Hordeum vulgare subsp. vulgare cDNA clone: FLbaf4h05, mRNA sequence	Rpr4901.2 [Hordeum vulgare subsp. vulgare]
CL16529.Contig1_All	K10580//ubiquitin-conjugating enzyme E2 N [EC:2.3.2.23]+ko04120//Ubiquitin mediated proteolysis	XM_020345854.1 PREDICTED: Aegilops tauschii subsp. tauschii ubiquitin-conjugating enzyme E2 36-like (LOC109787298), transcript variant X1, mRNA	ubiquitin-conjugating enzyme E2 36-like isoform X2 [Aegilops tauschii subsp. tauschii] >BAK05631.1 predicted protein [Hordeum vulgare subsp. vulgare] >BAK01323.1 predicted protein [Hordeum vulgare subsp. vulgare] >EMT08271.1 Ubiquitin carrier protein E2 36 [Aegilops tauschii]		Ubiquitin-conjugating enzyme E2 36 OS=Arabidopsis thaliana GN=UBC36 PE=1 SV=1
CL6402.Contig9_All	K17535//serine/threonine-protein kinase TNNI3K [EC:2.7.11.1];K04365//B-Raf proto-oncogene serine/threonine-protein kinase [EC:2.7.11.1]	XM_010232286.2 PREDICTED: Brachypodium distachyon serine/threonine-protein kinase HT1-like (LOC104582513), mRNA	PREDICTED: serine/threonine-protein kinase HT1-like [Brachypodium distachyon] >KQK03201.1 hypothetical protein BRADI_2g06260 [Brachypodium distachyon]	Protein tyrosine kinase	Serine/threonine-protein kinase HT1 OS=Arabidopsis thaliana GN=HT1 PE=1 SV=1	GO:0005524//ATP binding;GO:0004672//protein kinase activity;GO:0006468//protein phosphorylation;GO:0035556//intracellular signal transduction;GO:0004871//signal transducer activity;GO:0005737//cytoplasm
Unigene17167_All	K14016//ubiquitin fusion degradation protein 1+ko04141//Protein processing in endoplasmic reticulum	XM_020319698.1 PREDICTED: Aegilops tauschii subsp. tauschii uncharacterized LOC109760898 (LOC109760898), mRNA	PREDICTED: uncharacterized protein LOC100839040 [Brachypodium distachyon] >KQK13003.1 hypothetical protein BRADI_1g07380 [Brachypodium distachyon]	Protein of unknown function (DUF616)	Formin-like protein 5 OS=Oryza sativa subsp. japonica GN=FH5 PE=2 SV=2	GO:0016021//integral component of membrane
CL5247.Contig31_All	K03549//KUP system potassium uptake protein	XM_003580494.3 PREDICTED: Brachypodium distachyon probable potassium transporter 11 (LOC100838551), mRNA	PREDICTED: probable potassium transporter 11 [Brachypodium distachyon] >KQJ84574.1 hypothetical protein BRADI_5g21677 [Brachypodium distachyon]	K+ potassium transporter	Probable potassium transporter 11 OS=Oryza sativa subsp. japonica GN=HAK11 PE=2 SV=4	GO:0016020//membrane;GO:0016021//integral component of membrane;GO:0015079//potassium ion transmembrane transporter activity
CL1699.Contig17_All	K08592//sentrin-specific protease 1 [EC:3.4.22.68]	XM_003557887.3 PREDICTED: Brachypodium distachyon putative ubiquitin-like-specific protease 1B (LOC100842374), transcript variant X1, mRNA	PREDICTED: putative ubiquitin-like-specific protease 1B isoform X1 [Brachypodium distachyon] >KQK21735.1 hypothetical protein BRADI_1g62760 [Brachypodium distachyon]	Ulp1 protease family, C-terminal catalytic domain	Ubiquitin-like-specific protease ESD4 OS=Arabidopsis thaliana GN=ESD4 PE=1 SV=1	GO:0004175//endopeptidase activity;GO:0005634//nucleus;GO:0008234//cysteine-type peptidase activity;GO:0016926//protein desumoylation
CL5607.Contig12_All	K09560//suppressor of tumorigenicity protein 13	XM_020330742.1 PREDICTED: Aegilops tauschii subsp. tauschii TPR repeat-containing thioredoxin TDX (LOC109772046), transcript variant X2, mRNA	TPR repeat-containing thioredoxin TDX [Triticum urartu]	Tetratricopeptide repeat	TPR repeat-containing thioredoxin TDX OS=Oryza sativa subsp. japonica GN=Os09g0401200 PE=2 SV=1	GO:0006457//protein folding;GO:0010286//heat acclimation;GO:0042802//identical protein binding;GO:0045454//cell redox homeostasis;GO:0016671//oxidoreductase activity, acting on a sulfur group of donors, disulfide as acceptor;GO:0005623//cell;GO:0030544//Hsp70 protein binding;GO:0051259//protein oligomerization
CL14730.Contig2_All	K13545//red chlorophyll catabolite reductase [EC:1.3.7.12]+ko00860//Porphyrin and chlorophyll metabolism+ko01110//Biosynthesis of secondary metabolites	XM_003564293.3 PREDICTED: Brachypodium distachyon red chlorophyll catabolite reductase (LOC100843855), transcript variant X4, mRNA	PREDICTED: red chlorophyll catabolite reductase isoform X2 [Brachypodium distachyon]	Red chlorophyll catabolite reductase (RCC reductase)	Red chlorophyll catabolite reductase (Fragment) OS=Hordeum vulgare GN=rccR PE=1 SV=1
CL1128.Contig1_All	K05643//ATP-binding cassette, subfamily A (ABC1), member 3+ko02010//ABC transporters	XM_003572125.3 PREDICTED: Brachypodium distachyon ABC transporter A family member 7-like (LOC100841745), mRNA	PREDICTED: ABC transporter A family member 7-like [Brachypodium distachyon] >KQJ98195.1 hypothetical protein BRADI_3g35390 [Brachypodium distachyon]	AAA domain, putative AbiEii toxin, Type IV TA system	ABC transporter A family member 7 OS=Arabidopsis thaliana GN=ABCA7 PE=3 SV=2	GO:0043231//intracellular membrane-bounded organelle;GO:0005524//ATP binding;GO:0006869//lipid transport;GO:0042626//ATPase activity, coupled to transmembrane movement of substances;GO:0016021//integral component of membrane
CL11480.Contig9_All	K20283//golgin subfamily A member 4	AK366124.1 Hordeum vulgare subsp. vulgare mRNA for predicted protein, partial cds, clone: NIASHv2040I02	predicted protein, partial [Hordeum vulgare subsp. vulgare]	Tropomyosin	WPP domain-interacting tail-anchored protein 1 OS=Arabidopsis thaliana GN=WIT1 PE=1 SV=2
CL8981.Contig4_All	K04733//interleukin-1 receptor-associated kinase 4 [EC:2.7.11.1];K00430//peroxidase [EC:1.11.1.7]+ko01100//Metabolic pathways+ko01110//Biosynthesis of secondary metabolites+ko00940//Phenylpropanoid biosynthesis	AP014959.1 Oryza sativa Japonica Group DNA, chromosome 3, cultivar: Nipponbare, complete sequence	PREDICTED: uncharacterized protein LOC102718813 [Oryza brachyantha] >XP_015690872.1 PREDICTED: uncharacterized protein LOC102718813 [Oryza brachyantha]	Core-2/I-Branching enzyme	Sulfated surface glycoprotein 185 OS=Volvox carteri PE=1 SV=1	GO:0008375//acetylglucosaminyltransferase activity;GO:0016020//membrane;GO:0009506//plasmodesma;GO:0016021//integral component of membrane
CL1222.Contig9_All	K11168//dehydrogenase/reductase SDR family member 12 [EC:1.1.-.-]	XM_020324422.1 PREDICTED: Aegilops tauschii subsp. tauschii dehydrogenase/reductase SDR family member 12 (LOC109765638), mRNA	Dehydrogenase/reductase SDR family member 12 [Triticum urartu]	short chain dehydrogenase	Protochlorophyllide reductase C, chloroplastic OS=Arabidopsis thaliana GN=PORC PE=1 SV=1
CL11028.Contig2_All	K14515//EIN3-binding F-box protein+ko04016//MAPK signaling pathway - plant+ko04075//Plant hormone signal transduction;K10268//F-box and leucine-rich repeat protein 2/20	XR_002228850.1 PREDICTED: Aegilops tauschii subsp. tauschii F-box protein At5g67140-like (LOC109746742), transcript variant X3, misc_RNA	F-box protein At5g67140-like isoform X2 [Aegilops tauschii subsp. tauschii]	F-box-like	F-box protein At5g67140 OS=Arabidopsis thaliana GN=At5g67140 PE=2 SV=1
Unigene54835_All	K00913//inositol-1,3,4-trisphosphate 5/6-kinase / inositol-tetrakisphosphate 1-kinase [EC:2.7.1.159 2.7.1.134]+ko01100//Metabolic pathways+ko04070//Phosphatidylinositol signaling system+ko00562//Inositol phosphate metabolism	XM_003573705.3 PREDICTED: Brachypodium distachyon inositol-tetrakisphosphate 1-kinase 1 (LOC100821944), mRNA	PREDICTED: inositol-tetrakisphosphate 1-kinase 1 [Brachypodium distachyon] >KQJ96196.1 hypothetical protein BRADI_3g21470 [Brachypodium distachyon]	Inositol 1, 3, 4-trisphosphate 5/6-kinase	Inositol-tetrakisphosphate 1-kinase 1 OS=Oryza sativa subsp. indica GN=ITPK1 PE=3 SV=1	GO:0000287//magnesium ion binding;GO:0052725//inositol-1,3,4-trisphosphate 6-kinase activity;GO:0005524//ATP binding;GO:0005622//intracellular;GO:0032957//inositol trisphosphate metabolic process;GO:0052726//inositol-1,3,4-trisphosphate 5-kinase activity;GO:0047325//inositol tetrakisphosphate 1-kinase activity
Unigene7487_All		AK366814.1 Hordeum vulgare subsp. vulgare mRNA for predicted protein, complete cds, clone: NIASHv2047A23	predicted protein [Hordeum vulgare subsp. vulgare]	Tumour suppressor protein
CL164.Contig15_All	K07937//ADP-ribosylation factor 1+ko04144//Endocytosis	XM_010229559.2 PREDICTED: Brachypodium distachyon ADP-ribosylation factor (LOC104581611), mRNA	hypothetical protein CDL15_Pgr018284 [Punica granatum]	ADP-ribosylation factor family	ADP-ribosylation factor 1 OS=Arabidopsis thaliana GN=ARF1 PE=1 SV=2
CL15663.Contig3_All	K09286//EREBP-like factor	XM_003574416.3 PREDICTED: Brachypodium distachyon ethylene-responsive transcription factor RAP2-13 (LOC100836054), mRNA	PREDICTED: ethylene-responsive transcription factor RAP2-13 [Brachypodium distachyon] >KQJ98221.1 hypothetical protein BRADI_3g35560 [Brachypodium distachyon]	AP2 domain	Ethylene-responsive transcription factor RAP2-13 OS=Arabidopsis thaliana GN=RAP2-13 PE=1 SV=1	GO:0003677//DNA binding;GO:0005634//nucleus;GO:0006351//transcription, DNA-templated;GO:0003700//DNA binding transcription factor activity
Unigene4460_All	K10712//cysteamine dioxygenase [EC:1.13.11.19]+ko00430//Taurine and hypotaurine metabolism+ko01100//Metabolic pathways	XM_003561432.3 PREDICTED: Brachypodium distachyon uncharacterized LOC100841601 (LOC100841601), mRNA	PREDICTED: uncharacterized protein LOC100841601 [Brachypodium distachyon] >KQK13859.1 hypothetical protein BRADI_1g12940 [Brachypodium distachyon]			GO:0016021//integral component of membrane
CL15518.Contig2_All	K22804//structural maintenance of chromosomes protein 6;K18195//rhamnogalacturonan endolyase [EC:4.2.2.23];K01188//beta-glucosidase [EC:3.2.1.21]+ko01100//Metabolic pathways+ko00500//Starch and sucrose metabolism+ko01110//Biosynthesis of secondary metabolites+ko00460//Cyanoamino acid metabolism+ko00940//Phenylpropanoid biosynthesis;K19026//spatacsin	AP004959.1 Lotus japonicus genomic DNA, chromosome 3, clone: LjT21I12, TM0136, complete sequence	uncharacterized protein LOC109768476 isoform X1 [Aegilops tauschii subsp. tauschii]	Reverse transcriptase (RNA-dependent DNA polymerase)	Uncharacterized mitochondrial protein AtMg01250 OS=Arabidopsis thaliana GN=AtMg01250 PE=4 SV=1
CL1751.Contig7_All	K02184//formin 2	XM_003578319.3 PREDICTED: Brachypodium distachyon uncharacterized LOC100836084 (LOC100836084), mRNA	PREDICTED: uncharacterized protein LOC101756298 [Setaria italica]		Sulfated surface glycoprotein 185 OS=Volvox carteri PE=1 SV=1
Unigene29954_All	K11584//serine/threonine-protein phosphatase 2A regulatory subunit B'+ko03015//mRNA surveillance pathway	XM_003573274.3 PREDICTED: Brachypodium distachyon serine/threonine protein phosphatase 2A 57 kDa regulatory subunit B' theta isoform-like (LOC100845308), mRNA	PREDICTED: serine/threonine protein phosphatase 2A 57 kDa regulatory subunit B' theta isoform-like [Brachypodium distachyon] >KQJ94922.1 hypothetical protein BRADI_3g14090 [Brachypodium distachyon]	Protein phosphatase 2A regulatory B subunit (B56 family)	Serine/threonine protein phosphatase 2A 59 kDa regulatory subunit B' zeta isoform OS=Arabidopsis thaliana GN=B'ZETA PE=2 SV=2	GO:0007165//signal transduction;GO:0019888//protein phosphatase regulator activity;GO:0000159//protein phosphatase type 2A complex
Unigene57663_All	K13171//serine/arginine repetitive matrix protein 1+ko03015//mRNA surveillance pathway+ko03013//RNA transport;K22020//mucin-19	XM_020291074.1 PREDICTED: Aegilops tauschii subsp. tauschii UPF0481 protein At3g47200-like (LOC109731898), mRNA	PREDICTED: UPF0481 protein At3g47200 [Oryza sativa Japonica Group] >ABF95574.1 expressed protein [Oryza sativa Japonica Group] >BAF11831.1 Os03g0310600 [Oryza sativa Japonica Group] >EAY89734.1 hypothetical protein OsI_11273 [Oryza sativa Indica Group] >BAG98875.1 unnamed protein product [Oryza sativa Japonica Group] >BAS83856.1 Os03g0310600 [Oryza sativa Japonica Group]	Plant protein of unknown function	Serine/arginine-rich splicing factor SR45 OS=Arabidopsis thaliana GN=SR45 PE=1 SV=1
CL10617.Contig10_All	K09875//aquaporin SIP	XR_001405420.1 PREDICTED: Brachypodium distachyon alpha-L-arabinofuranosidase 1-like (LOC100844814), transcript variant X4, misc_RNA	Aquaporin SIP2-1 [Dichanthelium oligosanthes]	Major intrinsic protein	Aquaporin SIP2-1 OS=Zea mays GN=SIP2-1 PE=2 SV=1	GO:0005783//endoplasmic reticulum;GO:0016021//integral component of membrane;GO:0005215//transporter activity
CL14623.Contig2_All	K15429//tRNA (guanine37-N1)-methyltransferase [EC:2.1.1.228]	XM_003567670.3 PREDICTED: Brachypodium distachyon tRNA (guanine(37)-N1)-methyltransferase 1 (LOC100845993), transcript variant X1, mRNA	PREDICTED: tRNA (guanine(37)-N1)-methyltransferase 1 isoform X1 [Brachypodium distachyon] >KQK04401.1 hypothetical protein BRADI_2g13350 [Brachypodium distachyon]	Met-10+ like-protein	tRNA (guanine(37)-N1)-methyltransferase 1 OS=Vitis vinifera GN=VIT_19s0014g03930 PE=3 SV=1	GO:0005759//mitochondrial matrix;GO:0005634//nucleus;GO:0052906//tRNA (guanine(37)-N(1))-methyltransferase activity
CL8737.Contig2_All	K08867//WNK lysine deficient protein kinase [EC:2.7.11.1];K13171//serine/arginine repetitive matrix protein 1+ko03015//mRNA surveillance pathway+ko03013//RNA transport	XM_020322200.1 PREDICTED: Aegilops tauschii subsp. tauschii transcription factor LHW-like (LOC109763362), transcript variant X1, mRNA	PREDICTED: transcription factor LHW [Brachypodium distachyon] >KQJ92159.1 hypothetical protein BRADI_4g41970 [Brachypodium distachyon]	bHLH-MYC and R2R3-MYB transcription factors N-terminal	Transcription factor bHLH157 OS=Arabidopsis thaliana GN=BHLH157 PE=1 SV=1	GO:0005634//nucleus;GO:0006355//regulation of transcription, DNA-templated;GO:0048364//root development;GO:0003700//DNA binding transcription factor activity;GO:0046983//protein dimerization activity
CL738.Contig23_All	K15893//hydroxypyruvate reductase 1+ko01100//Metabolic pathways+ko01110//Biosynthesis of secondary metabolites+ko00260//Glycine, serine and threonine metabolism+ko01200//Carbon metabolism+ko00630//Glyoxylate and dicarboxylate metabolism	XM_020326668.1 PREDICTED: Aegilops tauschii subsp. tauschii glycerate dehydrogenase (LOC109767931), mRNA	PREDICTED: glycerate dehydrogenase [Oryza sativa Japonica Group] >BAD07805.1 putative hydroxypyruvate reductase [Oryza sativa Japonica Group] >BAD08188.1 putative hydroxypyruvate reductase [Oryza sativa Japonica Group] >BAF07503.1 Os02g0101500 [Oryza sativa Japonica Group] >BAG90513.1 unnamed protein product [Oryza sativa Japonica Group] >EEE56124.1 hypothetical protein OsJ_04992 [Oryza sativa Ja…	D-isomer specific 2-hydroxyacid dehydrogenase, NAD binding domain	Glycerate dehydrogenase HPR, peroxisomal OS=Arabidopsis thaliana GN=HPR PE=1 SV=1	GO:0016616//oxidoreductase activity, acting on the CH-OH group of donors, NAD or NADP as acceptor;GO:0005829//cytosol;GO:0051287//NAD binding;GO:0016618//hydroxypyruvate reductase activity;GO:0030267//glyoxylate reductase (NADP) activity
CL6421.Contig29_All		XM_003564777.3 PREDICTED: Brachypodium distachyon calreticulin-3 (LOC100837158), mRNA	hypothetical protein TRIUR3_19327 [Triticum urartu]			GO:0010478//chlororespiration;GO:0009579//thylakoid;GO:0009570//chloroplast stroma
CL10736.Contig4_All	K09566//peptidyl-prolyl isomerase G (cyclophilin G) [EC:5.2.1.8]	AK356768.1 Hordeum vulgare subsp. vulgare mRNA for predicted protein, complete cds, clone: NIASHv1039I03	splicing regulatory glutamine/lysine-rich protein 1 [Aegilops tauschii subsp. tauschii]		Splicing factor U2af large subunit A OS=Arabidopsis thaliana GN=U2AF65A PE=1 SV=2
CL8373.Contig2_All	K04733//interleukin-1 receptor-associated kinase 4 [EC:2.7.11.1]	AK363223.1 Hordeum vulgare subsp. vulgare mRNA for predicted protein, complete cds, clone: NIASHv2013J02	OSIGBa0157N01.3 [Oryza sativa]	D-mannose binding lectin	Epidermis-specific secreted glycoprotein EP1 OS=Daucus carota GN=EP1 PE=1 SV=1	GO:0004674//protein serine/threonine kinase activity;GO:0005524//ATP binding;GO:0016021//integral component of membrane
CL13594.Contig4_All	K13153//U11/U12 small nuclear ribonucleoprotein 25 kDa protein	AK251590.1 Hordeum vulgare subsp. vulgare cDNA clone: FLbaf123o01, mRNA sequence	U11/U12 small nuclear ribonucleoprotein 25 kDa protein-like [Aegilops tauschii subsp. tauschii]	Ubiquitin family	U11/U12 small nuclear ribonucleoprotein 25 kDa protein OS=Arabidopsis thaliana GN=SNRNP25 PE=2 SV=1
CL13719.Contig2_All	K13466//EIX receptor 1/2+ko04626//Plant-pathogen interaction	XM_003573986.3 PREDICTED: Brachypodium distachyon probable leucine-rich repeat receptor-like protein kinase At2g33170 (LOC100832355), mRNA	PREDICTED: probable leucine-rich repeat receptor-like protein kinase At2g33170 [Brachypodium distachyon] >KQJ97030.1 hypothetical protein BRADI_3g28390 [Brachypodium distachyon]	Leucine rich repeat	Probable inactive leucine-rich repeat receptor kinase XIAO OS=Oryza sativa subsp. japonica GN=XIAO PE=2 SV=1	GO:0016021//integral component of membrane
Unigene37901_All	K22020//mucin-19	XM_020328898.1 PREDICTED: Aegilops tauschii subsp. tauschii scarecrow-like protein 6 (LOC109770185), mRNA	PREDICTED: scarecrow-like protein 6 isoform X1 [Setaria italica]	GRAS domain family	Scarecrow-like protein 6 OS=Arabidopsis thaliana GN=SCL6 PE=1 SV=1	GO:0005634//nucleus;GO:0030154//cell differentiation;GO:0006355//regulation of transcription, DNA-templated;GO:0043565//sequence-specific DNA binding;GO:0006351//transcription, DNA-templated;GO:0003700//DNA binding transcription factor activity
CL10081.Contig3_All	K12590//exosome complex component RRP46+ko03018//RNA degradation	XM_020320544.1 PREDICTED: Aegilops tauschii subsp. tauschii exosome complex exonuclease RRP46 homolog (LOC109761713), mRNA	PREDICTED: exosome complex exonuclease RRP46 homolog [Brachypodium distachyon] >KQK12026.1 hypothetical protein BRADI_1g01100 [Brachypodium distachyon]	3' exoribonuclease family, domain 1	Exosome complex exonuclease RRP46 homolog OS=Oryza sativa subsp. japonica GN=RRP46 PE=1 SV=2	GO:0031125//rRNA 3'-end processing;GO:0016075//rRNA catabolic process;GO:0034427//nuclear-transcribed mRNA catabolic process, exonucleolytic, 3'-5';GO:0042802//identical protein binding;GO:0004536//deoxyribonuclease activity;GO:0000176//nuclear exosome (RNase complex);GO:0071028//nuclear mRNA surveillance;GO:0003690//double-stranded DNA binding;GO:0004527//exonuclease activity;GO:0005730//nucleol…
CL13254.Contig2_All		XM_003574010.3 PREDICTED: Brachypodium distachyon exportin-4 (LOC100839622), transcript variant X1, mRNA	PREDICTED: exportin-4 [Brachypodium distachyon] >KQJ97088.1 hypothetical protein BRADI_3g28760 [Brachypodium distachyon]	Protein of unknown function (DUF445)		GO:0005643//nuclear pore;GO:0008536//Ran GTPase binding;GO:0005049//nuclear export signal receptor activity;GO:0006611//protein export from nucleus;GO:0005737//cytoplasm
CL14454.Contig28_All	K13412//calcium-dependent protein kinase [EC:2.7.11.1]+ko04626//Plant-pathogen interaction	XM_010230066.2 PREDICTED: Brachypodium distachyon calcium-dependent protein kinase 26-like (LOC100836186), transcript variant X2, mRNA	PREDICTED: calcium-dependent protein kinase 26-like [Brachypodium distachyon] >XP_010228368.1 PREDICTED: calcium-dependent protein kinase 26-like [Brachypodium distachyon] >KQK20828.1 hypothetical protein BRADI_1g56970 [Brachypodium distachyon] >KQK20829.1 hypothetical protein BRADI_1g56970 [Brachypodium distachyon]	Protein kinase domain	Calcium-dependent protein kinase 17 OS=Oryza sativa subsp. japonica GN=CPK17 PE=2 SV=1	GO:0016020//membrane;GO:0005634//nucleus;GO:0009738//abscisic acid-activated signaling pathway;GO:0005524//ATP binding;GO:0035556//intracellular signal transduction;GO:0005737//cytoplasm;GO:0046777//protein autophosphorylation;GO:0018105//peptidyl-serine phosphorylation;GO:0005509//calcium ion binding;GO:0004683//calmodulin-dependent protein kinase activity;GO:0009931//calcium-dependent protein s…
CL14556.Contig5_All		FP099974.1 Phyllostachys edulis cDNA clone: bphylf057g09, full insert sequence	PREDICTED: uncharacterized protein LOC100825549 [Brachypodium distachyon] >KQK23637.1 hypothetical protein BRADI_1g75100 [Brachypodium distachyon]	HR-like lesion-inducing		GO:0016021//integral component of membrane
CL2073.Contig9_All	K11968//ariadne-1 [EC:2.3.2.31]	XM_003576680.3 PREDICTED: Brachypodium distachyon probable E3 ubiquitin-protein ligase ARI7 (LOC100823610), mRNA	PREDICTED: probable E3 ubiquitin-protein ligase ARI7 [Brachypodium distachyon] >KQJ91000.1 hypothetical protein BRADI_4g35080 [Brachypodium distachyon]	IBR domain, a half RING-finger domain	Probable E3 ubiquitin-protein ligase ARI8 OS=Arabidopsis thaliana GN=ARI8 PE=2 SV=1	GO:0061630//ubiquitin protein ligase activity;GO:0042787//protein ubiquitination involved in ubiquitin-dependent protein catabolic process;GO:0032436//positive regulation of proteasomal ubiquitin-dependent protein catabolic process;GO:0005737//cytoplasm;GO:0031624//ubiquitin conjugating enzyme binding;GO:0046872//metal ion binding;GO:0000151//ubiquitin ligase complex;GO:0000209//protein polyubiqu…
CL6972.Contig9_All	K01873//valyl-tRNA synthetase [EC:6.1.1.9]+ko00970//Aminoacyl-tRNA biosynthesis	XM_020317354.1 PREDICTED: Aegilops tauschii subsp. tauschii valine--tRNA ligase, chloroplastic/mitochondrial 2 (LOC109758495), transcript variant X3, mRNA	PREDICTED: valine--tRNA ligase, chloroplastic/mitochondrial 2 [Oryza sativa Japonica Group] >EEC81562.1 hypothetical protein OsI_25003 [Oryza sativa Indica Group]	tRNA synthetases class I (I, L, M and V)	Valine--tRNA ligase, chloroplastic/mitochondrial 2 OS=Arabidopsis thaliana GN=EMB2247 PE=3 SV=1	GO:0004832//valine-tRNA ligase activity;GO:0005524//ATP binding;GO:0002161//aminoacyl-tRNA editing activity;GO:0006438//valyl-tRNA aminoacylation;GO:0009793//embryo development ending in seed dormancy;GO:0009570//chloroplast stroma
CL3285.Contig3_All	K17964//leucine-rich PPR motif-containing protein, mitochondrial;K20291//conserved oligomeric Golgi complex subunit 4	XM_014900254.1 PREDICTED: Brachypodium distachyon pentatricopeptide repeat-containing protein At1g80150, mitochondrial (LOC100832983), transcript variant X4, mRNA	PREDICTED: pentatricopeptide repeat-containing protein At1g80150, mitochondrial [Brachypodium distachyon] >XP_010235259.1 PREDICTED: pentatricopeptide repeat-containing protein At1g80150, mitochondrial [Brachypodium distachyon] >XP_014755739.1 PREDICTED: pentatricopeptide repeat-containing protein At1g80150, mitochondrial [Brachypodium distachyon] >XP_014755740.1 PREDICTED: pentatricopeptide repe…	PPR repeat family	Pentatricopeptide repeat-containing protein At1g80150, mitochondrial OS=Arabidopsis thaliana GN=At1g80150 PE=2 SV=2	GO:0043231//intracellular membrane-bounded organelle;GO:0003723//RNA binding;GO:0009451//RNA modification;GO:0004519//endonuclease activity
Unigene54884_All	K13415//protein brassinosteroid insensitive 1 [EC:2.7.10.1 2.7.11.1]+ko04075//Plant hormone signal transduction;K13343//peroxin-14+ko04146//Peroxisome;K10592//E3 ubiquitin-protein ligase HUWE1 [EC:2.3.2.26]+ko04120//Ubiquitin mediated proteolysis;K00876//uridine kinase [EC:2.7.1.48]+ko01100//Metabolic pathways+ko00240//Pyrimidine metabolism		PREDICTED: uncharacterized protein LOC104581310 [Brachypodium distachyon]
Unigene31202_All	K12828//splicing factor 3B subunit 1+ko03040//Spliceosome	XM_014897061.1 PREDICTED: Brachypodium distachyon splicing factor 3B subunit 1-like (LOC100835688), transcript variant X9, mRNA	PREDICTED: splicing factor 3B subunit 1 [Brachypodium distachyon] >XP_003574559.1 PREDICTED: splicing factor 3B subunit 1 [Brachypodium distachyon] >KQJ93292.1 hypothetical protein BRADI_3g03690 [Brachypodium distachyon] >KQJ93293.1 hypothetical protein BRADI_3g03690 [Brachypodium distachyon] >KQJ93294.1 hypothetical protein BRADI_3g03690 [Brachypodium distachyon] >KQJ93295.1 hypothetical protein…	Splicing factor 3B subunit 1	Extensin OS=Zea mays GN=HRGP PE=2 SV=1	GO:0003729//mRNA binding;GO:0071004//U2-type prespliceosome;GO:0005686//U2 snRNP;GO:0000245//spliceosomal complex assembly;GO:0005689//U12-type spliceosomal complex;GO:0071013//catalytic step 2 spliceosome
CL9071.Contig1_All	K15919//hydroxypyruvate reductase 2+ko01100//Metabolic pathways+ko01110//Biosynthesis of secondary metabolites+ko00260//Glycine, serine and threonine metabolism+ko01200//Carbon metabolism+ko00630//Glyoxylate and dicarboxylate metabolism	XM_003565861.3 PREDICTED: Brachypodium distachyon hydroxyphenylpyruvate reductase (LOC100831724), transcript variant X1, mRNA	predicted protein [Hordeum vulgare subsp. vulgare]	D-isomer specific 2-hydroxyacid dehydrogenase, NAD binding domain	Hydroxyphenylpyruvate reductase OS=Plectranthus scutellarioides GN=HPPR PE=1 SV=2
CL664.Contig33_All	K10406//kinesin family member C2/C3;K10405//kinesin family member C1;K06674//structural maintenance of chromosome 2	CT829517.1 Oryza sativa (indica cultivar-group) cDNA clone:OSIGCPI217A21, full insert sequence	PREDICTED: centromere-associated protein E-like isoform X4 [Brachypodium distachyon] >XP_014753238.1 PREDICTED: centromere-associated protein E-like isoform X4 [Brachypodium distachyon]	PH domain	Kinesin-like protein KIN-12D OS=Arabidopsis thaliana GN=KIN12D PE=2 SV=1
CL16441.Contig10_All	K14502//protein brassinosteroid insensitive 2 [EC:2.7.11.1]+ko04075//Plant hormone signal transduction	FP096179.1 Phyllostachys edulis cDNA clone: bphylf050n18, full insert sequence	putative glycogen synthase kinase family protein [Zea mays] >ACF79495.1 unknown [Zea mays] >ACN27945.1 unknown [Zea mays] >AQK82667.1 Shaggy-related protein kinase iota [Zea mays]	Protein kinase domain	Shaggy-related protein kinase GSK4 OS=Oryza sativa subsp. japonica GN=GSK4 PE=1 SV=1	GO:0004674//protein serine/threonine kinase activity;GO:0005524//ATP binding
CL16127.Contig2_All	K18635//protein SPIRAL1 and related proteins	FP097466.1 Phyllostachys edulis cDNA clone: bphyst032k16, full insert sequence	hypothetical protein BAE44_0009903 [Dichanthelium oligosanthes]		Protein SPIRAL1-like 1 OS=Oryza sativa subsp. japonica GN=Os03g0417800 PE=3 SV=1	GO:0005874//microtubule
Unigene66230_All
CL9466.Contig1_All	K17987//next to BRCA1 gene 1 protein	FP098762.1 Phyllostachys edulis cDNA clone: bphyst029j16, full insert sequence	rapid alkalinization factor-like [Aegilops tauschii subsp. tauschii]	Rapid ALkalinization Factor (RALF)	Rapid alkalinization factor 23 OS=Arabidopsis thaliana GN=RALF23 PE=1 SV=1	GO:0009506//plasmodesma;GO:0019722//calcium-mediated signaling;GO:0005622//intracellular;GO:0004871//signal transducer activity
Unigene38165_All
CL4824.Contig4_All	K01881//prolyl-tRNA synthetase [EC:6.1.1.15]+ko00970//Aminoacyl-tRNA biosynthesis	XM_003557502.3 PREDICTED: Brachypodium distachyon proline--tRNA ligase, chloroplastic/mitochondrial (LOC100829224), mRNA	Prolyl-tRNA synthetase [Aegilops tauschii]	Prolyl-tRNA synthetase, C-terminal	Proline--tRNA ligase, chloroplastic/mitochondrial OS=Arabidopsis thaliana GN=OVA6 PE=2 SV=1	GO:0006433//prolyl-tRNA aminoacylation;GO:0005524//ATP binding;GO:0005737//cytoplasm;GO:0048316//seed development;GO:0048481//plant ovule development;GO:0005739//mitochondrion;GO:0009553//embryo sac development;GO:0010109//regulation of photosynthesis;GO:0017101//aminoacyl-tRNA synthetase multienzyme complex;GO:0009570//chloroplast stroma;GO:0004827//proline-tRNA ligase activity
CL6980.Contig4_All	K16277//E3 ubiquitin-protein ligase DRIP [EC:2.3.2.27]	XM_015773240.1 PREDICTED: Oryza sativa Japonica Group E3 ubiquitin protein ligase DRIP2 (LOC9268320), mRNA	PREDICTED: E3 ubiquitin protein ligase DRIP2 [Oryza sativa Japonica Group] >AAR87290.1 expressed protein [Oryza sativa Japonica Group] >ABF98800.1 Zinc finger, C3HC4 type family protein, expressed [Oryza sativa Japonica Group] >EAZ28537.1 hypothetical protein OsJ_12518 [Oryza sativa Japonica Group]	Zinc finger, C3HC4 type (RING finger)	E3 ubiquitin protein ligase DRIP2 OS=Arabidopsis thaliana GN=DRIP2 PE=1 SV=1
Unigene33686_All	K18669//dual specificity tyrosine-phosphorylation-regulated kinase 2/3/4 [EC:2.7.12.1]	XM_003560506.3 PREDICTED: Brachypodium distachyon uncharacterized LOC100839568 (LOC100839568), mRNA	PREDICTED: uncharacterized protein LOC102716856 [Oryza brachyantha]		Serine/threonine-protein kinase AFC3 OS=Arabidopsis thaliana GN=AFC3 PE=2 SV=2	GO:0005524//ATP binding;GO:0004672//protein kinase activity;GO:0005829//cytosol;GO:0005886//plasma membrane
CL1942.Contig8_All	K11672//actin-related protein 5	XM_020319876.1 PREDICTED: Aegilops tauschii subsp. tauschii actin-related protein 5 (LOC109761083), mRNA	actin-related protein 5 [Aegilops tauschii subsp. tauschii]	Actin	Actin-related protein 5 OS=Oryza sativa subsp. japonica GN=ARP5 PE=3 SV=2
CL155.Contig3_All	K14513//ethylene-insensitive protein 2+ko04016//MAPK signaling pathway - plant+ko04075//Plant hormone signal transduction	XM_014897280.1 PREDICTED: Brachypodium distachyon ethylene-insensitive protein 2-like (LOC100840471), transcript variant X5, mRNA	PREDICTED: ethylene-insensitive protein 2-like isoform X3 [Brachypodium distachyon]	Natural resistance-associated macrophage protein	Protein ETHYLENE-INSENSITIVE 2 OS=Oryza sativa subsp. japonica GN=EIN2 PE=2 SV=1
CL7781.Contig5_All	K07541//phosphatidylinositol glycan, class X+ko01100//Metabolic pathways+ko00563//Glycosylphosphatidylinositol (GPI)-anchor biosynthesis	AK362533.1 Hordeum vulgare subsp. vulgare mRNA for predicted protein, partial cds, clone: NIASHv2007C11	hypothetical protein BAE44_0004262 [Dichanthelium oligosanthes]	PIG-X / PBN1
CL17229.Contig11_All	K01507//inorganic pyrophosphatase [EC:3.6.1.1]+ko00190//Oxidative phosphorylation	FP098888.1 Phyllostachys edulis cDNA clone: bphyst030f07, full insert sequence	soluble inorganic pyrophosphatase [Aegilops tauschii subsp. tauschii] >AFK26595.1 inorganic pyrophosphotase [Triticum aestivum] >EMS58489.1 Soluble inorganic pyrophosphatase [Triticum urartu]	Inorganic pyrophosphatase	Soluble inorganic pyrophosphatase OS=Oryza sativa subsp. indica GN=IPP PE=2 SV=1	GO:0000287//magnesium ion binding;GO:0004427//inorganic diphosphatase activity;GO:0006796//phosphate-containing compound metabolic process;GO:0005737//cytoplasm
CL1101.Contig2_All	K13115//coiled-coil domain-containing protein 130	FP097845.1 Phyllostachys edulis cDNA clone: bphylf026g08, full insert sequence	PREDICTED: coiled-coil domain-containing protein 130 [Oryza brachyantha]	Family of unknown function (DUF572)
CL1871.Contig18_All	K09566//peptidyl-prolyl isomerase G (cyclophilin G) [EC:5.2.1.8]	XM_010229987.2 PREDICTED: Brachypodium distachyon peptidyl-prolyl cis-trans isomerase CYP63-like (LOC100836372), transcript variant X1, mRNA	PREDICTED: peptidyl-prolyl cis-trans isomerase CYP63-like isoform X1 [Brachypodium distachyon] >KQK20597.1 hypothetical protein BRADI_1g55530 [Brachypodium distachyon]	Cyclophilin type peptidyl-prolyl cis-trans isomerase/CLD	Peptidyl-prolyl cis-trans isomerase OS=Unspecified eudicot DB-1992 PE=2 SV=1	GO:0003755//peptidyl-prolyl cis-trans isomerase activity
CL1093.Contig2_All	K14325//RNA-binding protein with serine-rich domain 1+ko03015//mRNA surveillance pathway+ko03013//RNA transport	FP099781.1 Phyllostachys edulis cDNA clone: bphylf044m07, full insert sequence	PREDICTED: serine/arginine-rich splicing factor SR45 [Brachypodium distachyon] >KQK11643.1 hypothetical protein BRADI_2g61380 [Brachypodium distachyon] >KQK11644.1 hypothetical protein BRADI_2g61380 [Brachypodium distachyon]		Serine/arginine-rich splicing factor SR45 OS=Arabidopsis thaliana GN=SR45 PE=1 SV=1	GO:0003723//RNA binding
CL3706.Contig3_All	K03850//alpha-1,2-glucosyltransferase [EC:2.4.1.256]+ko00510//N-Glycan biosynthesis+ko01100//Metabolic pathways	XM_010241790.2 PREDICTED: Brachypodium distachyon dol-P-Glc:Glc(2)Man(9)GlcNAc(2)-PP-Dol alpha-1,2-glucosyltransferase (LOC100827541), transcript variant X2, mRNA	PREDICTED: dol-P-Glc:Glc(2)Man(9)GlcNAc(2)-PP-Dol alpha-1,2-glucosyltransferase isoform X1 [Brachypodium distachyon] >KQJ83430.1 hypothetical protein BRADI_5g14887 [Brachypodium distachyon]	DIE2/ALG10 family	Dol-P-Glc:Glc(2)Man(9)GlcNAc(2)-PP-Dol alpha-1,2-glucosyltransferase OS=Arabidopsis thaliana GN=ALG10 PE=1 SV=1	GO:0004583//dolichyl-phosphate-glucose-glycolipid alpha-glucosyltransferase activity;GO:0009651//response to salt stress;GO:0006487//protein N-linked glycosylation;GO:0016021//integral component of membrane;GO:0005789//endoplasmic reticulum membrane;GO:0006488//dolichol-linked oligosaccharide biosynthetic process;GO:0048366//leaf development
CL7733.Contig3_All
Unigene65492_All	K19984//exocyst complex component 5	XM_003575286.3 PREDICTED: Brachypodium distachyon uncharacterized LOC100846528 (LOC100846528), mRNA	PREDICTED: uncharacterized protein LOC4329953 [Oryza sativa Japonica Group] >Q6K9C1.1 RecName: Full=Protein TAB2 homolog, chloroplastic; Flags: Precursor >BAD19229.1 putative Tab2 protein [Oryza sativa Japonica Group] >BAF09316.1 Os02g0610800 [Oryza sativa Japonica Group] >BAG94275.1 unnamed protein product [Oryza sativa Japonica Group] >BAS79711.1 Os02g0610800 [Oryza sativa Japonica Group]	Protein of unknown function (DUF1092)	Protein TAB2 homolog, chloroplastic OS=Oryza sativa subsp. japonica GN=Os02g0610800 PE=2 SV=1	GO:0003723//RNA binding;GO:0004435//phosphatidylinositol phospholipase C activity;GO:0035556//intracellular signal transduction;GO:0009658//chloroplast organization;GO:0048564//photosystem I assembly;GO:0006412//translation;GO:0009507//chloroplast;GO:0009704//de-etiolation;GO:0006629//lipid metabolic process
CL1432.Contig7_All	K14325//RNA-binding protein with serine-rich domain 1+ko03015//mRNA surveillance pathway+ko03013//RNA transport	XM_010233494.2 PREDICTED: Brachypodium distachyon uncharacterized LOC100843932 (LOC100843932), mRNA	PREDICTED: uncharacterized protein LOC100843932 [Brachypodium distachyon] >KQK13881.1 hypothetical protein BRADI_1g13097 [Brachypodium distachyon]
Unigene13735_All	K22390//acid phosphatase type 7	XM_020293859.1 PREDICTED: Aegilops tauschii subsp. tauschii probable inactive purple acid phosphatase 2 (LOC109734657), mRNA	probable inactive purple acid phosphatase 2 [Aegilops tauschii subsp. tauschii] >EMT11784.1 Putative inactive purple acid phosphatase 2 [Aegilops tauschii]	Calcineurin-like phosphoesterase	Probable inactive purple acid phosphatase 2 OS=Arabidopsis thaliana GN=PAP2 PE=2 SV=1	GO:0046872//metal ion binding;GO:0003993//acid phosphatase activity;GO:0016021//integral component of membrane
CL403.Contig10_All		XM_020344688.1 PREDICTED: Aegilops tauschii subsp. tauschii peptidyl-prolyl cis-trans isomerase CYP37, chloroplastic (LOC109786113), transcript variant X2, mRNA	hypothetical protein PAHAL_B04342 [Panicum hallii]	Cyclophilin type peptidyl-prolyl cis-trans isomerase/CLD	Peptidyl-prolyl cis-trans isomerase CYP37, chloroplastic OS=Arabidopsis thaliana GN=CYP37 PE=1 SV=3	GO:0003755//peptidyl-prolyl cis-trans isomerase activity
Unigene65387_All
Unigene19324_All	K11323//histone arginine demethylase JMJD6 [EC:1.14.11.-];K01414//oligopeptidase A [EC:3.4.24.70]	XM_010039560.2 PREDICTED: Eucalyptus grandis uncharacterized LOC104426489 (LOC104426489), mRNA	hypothetical protein BAE44_0000489 [Dichanthelium oligosanthes]	Calcium binding and coiled-coil domain (CALCOCO1) like
CL3089.Contig17_All	K13617//protein phosphatase methylesterase 1 [EC:3.1.1.89]	FP097892.1 Phyllostachys edulis cDNA clone: bphyst020n23, full insert sequence	protein phosphatase methylesterase 1-like [Aegilops tauschii subsp. tauschii] >XP_020171041.1 protein phosphatase methylesterase 1-like [Aegilops tauschii subsp. tauschii]	Alpha/beta hydrolase family		GO:0051723//protein methylesterase activity;GO:0006482//protein demethylation;GO:0005773//vacuole
CL10089.Contig2_All	K11446//histone demethylase JARID1 [EC:1.14.11.-]	XM_021455037.1 PREDICTED: Sorghum bicolor lysine-specific demethylase JMJ705 (LOC8056139), mRNA	hypothetical protein BRADI_2g58130 [Brachypodium distachyon]	JmjC domain, hydroxylase	Lysine-specific demethylase JMJ705 OS=Oryza sativa subsp. japonica GN=JMJ705 PE=1 SV=1	GO:0045815//positive regulation of gene expression, epigenetic;GO:0005634//nucleus;GO:0006355//regulation of transcription, DNA-templated;GO:0006351//transcription, DNA-templated;GO:0051213//dioxygenase activity;GO:0003676//nucleic acid binding;GO:0046872//metal ion binding;GO:0040010//positive regulation of growth rate;GO:0006952//defense response;GO:0071558//histone demethylase activity (H3-K27…
Unigene38646_All	K02881//large subunit ribosomal protein L18+ko03010//Ribosome	XM_020300917.1 PREDICTED: Aegilops tauschii subsp. tauschii uncharacterized LOC109741841 (LOC109741841), transcript variant X1, mRNA	hypothetical protein BRADI_3g29185 [Brachypodium distachyon]	Ribosomal L18 of archaea, bacteria, mitoch. and chloroplast		GO:0005840//ribosome;GO:0006412//translation;GO:0003735//structural constituent of ribosome;GO:0008097//5S rRNA binding
Unigene16331_All	K00894//ethanolamine kinase [EC:2.7.1.82]+ko01100//Metabolic pathways+ko00564//Glycerophospholipid metabolism	XM_010239903.2 PREDICTED: Brachypodium distachyon probable ethanolamine kinase (LOC100828034), transcript variant X3, mRNA	predicted protein [Hordeum vulgare subsp. vulgare]	Choline/ethanolamine kinase	Probable ethanolamine kinase OS=Arabidopsis thaliana GN=EMB1187 PE=2 SV=1	GO:0008654//phospholipid biosynthetic process;GO:0005886//plasma membrane
Unigene49818_All		XM_003569779.3 PREDICTED: Brachypodium distachyon transcription factor VOZ1 (LOC100840732), mRNA	PREDICTED: transcription factor VOZ1 [Brachypodium distachyon] >KQK09763.1 hypothetical protein BRADI_2g50070 [Brachypodium distachyon]	Perilipin family	Transcription factor VOZ1 OS=Arabidopsis thaliana GN=VOZ1 PE=1 SV=1
Unigene15801_All	K13457//disease resistance protein RPM1+ko04626//Plant-pathogen interaction	XM_020327157.1 PREDICTED: Aegilops tauschii subsp. tauschii putative disease resistance RPP13-like protein 3 (LOC109768432), mRNA	hypothetical protein BRADI_1g50420 [Brachypodium distachyon]
CL2116.Contig1_All	K10614//E3 ubiquitin-protein ligase HERC3 [EC:2.3.2.26]+ko04120//Ubiquitin mediated proteolysis;K10615//E3 ubiquitin-protein ligase HERC4 [EC:2.3.2.26]+ko04120//Ubiquitin mediated proteolysis	XM_010240432.2 PREDICTED: Brachypodium distachyon ultraviolet-B receptor UVR8 (LOC100839797), transcript variant X1, mRNA	ultraviolet-B receptor UVR8 [Aegilops tauschii subsp. tauschii]	Regulator of chromosome condensation (RCC1) repeat	PH, RCC1 and FYVE domains-containing protein 1 OS=Arabidopsis thaliana GN=PRAF1 PE=1 SV=1
CL9736.Contig1_All	K14553//U3 small nucleolar RNA-associated protein 18+ko03008//Ribosome biogenesis in eukaryotes	XM_003567975.3 PREDICTED: Brachypodium distachyon U3 small nucleolar RNA-associated protein 18 homolog (LOC100834791), transcript variant X2, mRNA	PREDICTED: U3 small nucleolar RNA-associated protein 18 homolog [Brachypodium distachyon] >XP_010231114.1 PREDICTED: U3 small nucleolar RNA-associated protein 18 homolog [Brachypodium distachyon] >KQK05209.1 hypothetical protein BRADI_2g18710 [Brachypodium distachyon]	WD domain, G-beta repeat	U3 small nucleolar RNA-associated protein 18 homolog OS=Arabidopsis thaliana GN=At5g14050 PE=1 SV=1	GO:0034388//Pwp2p-containing subcomplex of 90S preribosome;GO:0000462//maturation of SSU-rRNA from tricistronic rRNA transcript (SSU-rRNA, 5.8S rRNA, LSU-rRNA);GO:0032040//small-subunit processome
Unigene91543_All		XM_014896078.1 PREDICTED: Brachypodium distachyon chloroplastic group IIA intron splicing facilitator CRS1, chloroplastic (LOC100824962), transcript variant X4, mRNA	CRM-domain containing factor CFM2, chloroplastic [Aegilops tauschii subsp. tauschii]	CRS1 / YhbY (CRM) domain	CRM-domain containing factor CFM2, chloroplastic OS=Arabidopsis thaliana GN=CFM2 PE=1 SV=1	GO:0003723//RNA binding;GO:0000373//Group II intron splicing;GO:0009532//plastid stroma;GO:0000372//Group I intron splicing
Unigene39072_All	K21752//Dr1-associated corepressor	XM_003577444.3 PREDICTED: Brachypodium distachyon dr1-associated corepressor-like (LOC100823511), mRNA	Dr1-associated corepressor [Aegilops tauschii]	Histone-like transcription factor (CBF/NF-Y) and archaeal histone	Nuclear transcription factor Y subunit C-9 OS=Arabidopsis thaliana GN=NFYC9 PE=1 SV=1	GO:0005634//nucleus;GO:0046982//protein heterodimerization activity
CL11972.Contig3_All	K05747//Wiskott-Aldrich syndrome protein+ko04144//Endocytosis;K00430//peroxidase [EC:1.11.1.7]+ko01100//Metabolic pathways+ko01110//Biosynthesis of secondary metabolites+ko00940//Phenylpropanoid biosynthesis	XM_003563523.3 PREDICTED: Brachypodium distachyon uncharacterized LOC100838763 (LOC100838763), mRNA	plus agglutinin, partial [Chlamydomonas incerta]	Protein of unknown function (DUF2839)	Vegetative cell wall protein gp1 OS=Chlamydomonas reinhardtii GN=GP1 PE=1 SV=1	GO:0016021//integral component of membrane
CL7322.Contig8_All	K15449//tRNA wybutosine-synthesizing protein 1 [EC:4.1.3.44]	XM_020324270.1 PREDICTED: Aegilops tauschii subsp. tauschii probable methyltransferase PMT13 (LOC109765487), mRNA	predicted protein [Hordeum vulgare subsp. vulgare]	Putative S-adenosyl-L-methionine-dependent methyltransferase	Probable methyltransferase PMT13 OS=Arabidopsis thaliana GN=At4g00740 PE=2 SV=1	GO:0005768//endosome;GO:0008757//S-adenosylmethionine-dependent methyltransferase activity;GO:0052546//cell wall pectin metabolic process;GO:0016021//integral component of membrane;GO:0032259//methylation;GO:0005802//trans-Golgi network;GO:0005737//cytoplasm
CL16932.Contig2_All	K13254//spastin [EC:3.6.4.3]	FP100045.1 Phyllostachys edulis cDNA clone: bphyem203g11, full insert sequence	PREDICTED: spastin [Brachypodium distachyon] >KQK19706.1 hypothetical protein BRADI_1g49940 [Brachypodium distachyon]	ATPase family associated with various cellular activities (AAA)	ATPase family AAA domain-containing protein FIGL1 OS=Arabidopsis thaliana GN=FIGL1 PE=2 SV=2	GO:0005524//ATP binding
Unigene13447_All			PREDICTED: proline-rich receptor-like protein kinase PERK9 [Phoenix dactylifera]
Unigene64253_All	K12849//pre-mRNA-splicing factor 38A+ko03040//Spliceosome	XR_730899.2 PREDICTED: Brachypodium distachyon uncharacterized membrane protein sll0875 (LOC100836029), transcript variant X1, misc_RNA	hypothetical protein BRADI_2g48810 [Brachypodium distachyon] >KQK09573.1 hypothetical protein BRADI_2g48810 [Brachypodium distachyon]	Integral membrane protein DUF92	Protein VTE6, chloroplastic OS=Arabidopsis thaliana GN=VTE6 PE=1 SV=1	GO:0016021//integral component of membrane;GO:0009706//chloroplast inner membrane
Unigene49004_All	K00860//adenylylsulfate kinase [EC:2.7.1.25]+ko00920//Sulfur metabolism+ko00230//Purine metabolism+ko01100//Metabolic pathways	XM_003558511.3 PREDICTED: Brachypodium distachyon adenylyl-sulfate kinase 3 (LOC100827313), transcript variant X1, mRNA	PREDICTED: adenylyl-sulfate kinase 3 isoform X1 [Brachypodium distachyon] >KQK23060.1 hypothetical protein BRADI_1g71030 [Brachypodium distachyon]	Adenylylsulphate kinase	Adenylyl-sulfate kinase 3 OS=Arabidopsis thaliana GN=APK3 PE=1 SV=1	GO:0000103//sulfate assimilation;GO:0005524//ATP binding;GO:0070814//hydrogen sulfide biosynthetic process;GO:0004020//adenylylsulfate kinase activity
Unigene57912_All	K02184//formin 2	XM_010236749.2 PREDICTED: Brachypodium distachyon probable plastid-lipid-associated protein 3, chloroplastic (LOC100840444), mRNA	PREDICTED: probable plastid-lipid-associated protein 3, chloroplastic [Brachypodium distachyon] >KQJ97973.1 hypothetical protein BRADI_3g34400 [Brachypodium distachyon]	PAP_fibrillin	Probable plastid-lipid-associated protein 3, chloroplastic OS=Oryza sativa subsp. japonica GN=PAP3 PE=3 SV=1	GO:0010287//plastoglobule;GO:0009535//chloroplast thylakoid membrane
Unigene8561_All	K01738//cysteine synthase A [EC:2.5.1.47]+ko00920//Sulfur metabolism+ko01230//Biosynthesis of amino acids+ko01100//Metabolic pathways+ko01110//Biosynthesis of secondary metabolites+ko00270//Cysteine and methionine metabolism+ko01200//Carbon metabolism	FP097433.1 Phyllostachys edulis cDNA clone: bphylf045f18, full insert sequence	PREDICTED: cysteine synthase-like [Brachypodium distachyon] >KQK10293.1 hypothetical protein BRADI_2g53170 [Brachypodium distachyon]	Pyridoxal-phosphate dependent enzyme	Probable S-sulfocysteine synthase, chloroplastic OS=Arabidopsis thaliana GN=At3g03630 PE=1 SV=1	GO:0004124//cysteine synthase activity;GO:0009643//photosynthetic acclimation;GO:0005737//cytoplasm;GO:0031977//thylakoid lumen;GO:0090322//regulation of superoxide metabolic process;GO:0010310//regulation of hydrogen peroxide metabolic process;GO:0006535//cysteine biosynthetic process from serine;GO:0016740//transferase activity;GO:0030170//pyridoxal phosphate binding;GO:0009507//chloroplast;GO:…
Unigene1839_All		XM_014900001.1 PREDICTED: Brachypodium distachyon pentatricopeptide repeat-containing protein At4g18520 (LOC100830227), mRNA
CL14.Contig1_All	K13415//protein brassinosteroid insensitive 1 [EC:2.7.10.1 2.7.11.1]+ko04075//Plant hormone signal transduction;K20641//Rho GTPase-activating protein 20	FP096626.1 Phyllostachys edulis cDNA clone: bphylf027p18, full insert sequence	squamosa promoter-binding-like protein 13 [Aegilops tauschii subsp. tauschii]	SBP domain	Squamosa promoter-binding-like protein 13 OS=Oryza sativa subsp. japonica GN=SPL13 PE=2 SV=1	GO:0046872//metal ion binding;GO:0003677//DNA binding;GO:0005634//nucleus;GO:0006355//regulation of transcription, DNA-templated;GO:0006351//transcription, DNA-templated
CL17010.Contig2_All	K10956//protein transport protein SEC61 subunit alpha+ko04145//Phagosome+ko04141//Protein processing in endoplasmic reticulum+ko03060//Protein export;K14325//RNA-binding protein with serine-rich domain 1+ko03015//mRNA surveillance pathway+ko03013//RNA transport;K13172//serine/arginine repetitive matrix protein 2;K06627//cyclin-A	XM_020339665.1 PREDICTED: Aegilops tauschii subsp. tauschii trihelix transcription factor GT-4-like (LOC109781089), mRNA	PREDICTED: trihelix transcription factor GT-1 [Brachypodium distachyon] >KQJ83244.1 hypothetical protein BRADI_5g13900 [Brachypodium distachyon]	Myb/SANT-like DNA-binding domain	Trihelix transcription factor GT-1 OS=Arabidopsis thaliana GN=GT-1 PE=1 SV=1	GO:0000981//RNA polymerase II transcription factor activity, sequence-specific DNA binding;GO:0005634//nucleus
CL8978.Contig4_All	K07573//exosome complex component CSL4+ko03018//RNA degradation	XR_002235625.1 PREDICTED: Aegilops tauschii subsp. tauschii exosome complex component CSL4 (LOC109774601), transcript variant X2, misc_RNA	exosome complex component CSL4 [Aegilops tauschii subsp. tauschii]	Exosome component EXOSC1/CSL4		GO:0003723//RNA binding;GO:0000176//nuclear exosome (RNase complex);GO:0005737//cytoplasm
CL2819.Contig3_All	K04564//superoxide dismutase, Fe-Mn family [EC:1.15.1.1]+ko04146//Peroxisome	FP097824.1 Phyllostachys edulis cDNA clone: bphylf061c23, full insert sequence	Mn-superoxide dismutase, partial [Stipa purpurea]	Iron/manganese superoxide dismutases, C-terminal domain	Superoxide dismutase [Mn] 3.1, mitochondrial OS=Zea mays GN=SODA.4 PE=2 SV=1	GO:0004784//superoxide dismutase activity;GO:0005507//copper ion binding;GO:0009651//response to salt stress;GO:0010043//response to zinc ion;GO:0042742//defense response to bacterium;GO:0005739//mitochondrion;GO:0009793//embryo development ending in seed dormancy
CL2073.Contig3_All	K11968//ariadne-1 [EC:2.3.2.31]	XM_003576680.3 PREDICTED: Brachypodium distachyon probable E3 ubiquitin-protein ligase ARI7 (LOC100823610), mRNA	PREDICTED: probable E3 ubiquitin-protein ligase ARI7 [Brachypodium distachyon] >KQJ91000.1 hypothetical protein BRADI_4g35080 [Brachypodium distachyon]	IBR domain, a half RING-finger domain	Probable E3 ubiquitin-protein ligase ARI8 OS=Arabidopsis thaliana GN=ARI8 PE=2 SV=1	GO:0061630//ubiquitin protein ligase activity;GO:0042787//protein ubiquitination involved in ubiquitin-dependent protein catabolic process;GO:0032436//positive regulation of proteasomal ubiquitin-dependent protein catabolic process;GO:0005737//cytoplasm;GO:0031624//ubiquitin conjugating enzyme binding;GO:0046872//metal ion binding;GO:0000151//ubiquitin ligase complex;GO:0000209//protein polyubiqu…
CL15500.Contig17_All	K06634//cyclin H+ko03420//Nucleotide excision repair+ko03022//Basal transcription factors	FP101128.1 Phyllostachys edulis cDNA clone: bphyst002o19, full insert sequence	Cyclin-H1-1 [Saccharum hybrid cultivar R570]	Cyclin C-terminal domain	Cyclin-H1-1 OS=Oryza sativa subsp. japonica GN=CYCH1-1 PE=1 SV=1	GO:1901409//positive regulation of phosphorylation of RNA polymerase II C-terminal domain;GO:0005634//nucleus;GO:0016538//cyclin-dependent protein serine/threonine kinase regulator activity;GO:0045737//positive regulation of cyclin-dependent protein serine/threonine kinase activity;GO:0000307//cyclin-dependent protein kinase holoenzyme complex;GO:0051301//cell division;GO:0045944//positive regula…
CL11424.Contig1_All	K14550//U3 small nucleolar RNA-associated protein 10+ko03008//Ribosome biogenesis in eukaryotes	XM_003580226.3 PREDICTED: Brachypodium distachyon uncharacterized protein At3g06530 (LOC100833028), mRNA	uncharacterized protein At3g06530 [Aegilops tauschii subsp. tauschii]		Uncharacterized protein At3g06530 OS=Arabidopsis thaliana GN=At3g06530 PE=1 SV=3
CL9827.Contig2_All	K10591//E3 ubiquitin-protein ligase NEDD4 [EC:2.3.2.26]+ko04144//Endocytosis+ko04120//Ubiquitin mediated proteolysis	XM_003576621.3 PREDICTED: Brachypodium distachyon E3 ubiquitin-protein ligase UPL5 (LOC100826898), mRNA	PREDICTED: E3 ubiquitin-protein ligase UPL5 [Brachypodium distachyon] >KQJ90726.1 hypothetical protein BRADI_4g33520 [Brachypodium distachyon]		E3 ubiquitin-protein ligase UPL5 OS=Arabidopsis thaliana GN=UPL5 PE=1 SV=1	GO:0004842//ubiquitin-protein transferase activity
Unigene38499_All	K01469//5-oxoprolinase (ATP-hydrolysing) [EC:3.5.2.9]+ko01100//Metabolic pathways+ko00480//Glutathione metabolism	XM_003571930.3 PREDICTED: Brachypodium distachyon 37S ribosomal protein S22, mitochondrial (LOC100843174), mRNA	PREDICTED: 37S ribosomal protein S22, mitochondrial [Brachypodium distachyon] >KQJ97493.1 hypothetical protein BRADI_3g31397 [Brachypodium distachyon]	Mitochondrial small ribosomal subunit Rsm22		GO:0008168//methyltransferase activity;GO:0006412//translation
CL9194.Contig3_All	K13172//serine/arginine repetitive matrix protein 2;K13171//serine/arginine repetitive matrix protein 1+ko03015//mRNA surveillance pathway+ko03013//RNA transport	XM_020323579.1 PREDICTED: Aegilops tauschii subsp. tauschii protein PAM68, chloroplastic (LOC109764799), mRNA	hypothetical protein TRIUR3_12218 [Triticum urartu]	Protein of unknown function (DUF3464)	Protein PAM68, chloroplastic OS=Arabidopsis thaliana GN=PAM68 PE=1 SV=1	GO:0016021//integral component of membrane;GO:0009507//chloroplast
CL3169.Contig7_All	K08504//blocked early in transport 1+ko04130//SNARE interactions in vesicular transport	FP100539.1 Phyllostachys edulis cDNA clone: bphylf028c09, full insert sequence	PREDICTED: bet1-like SNARE 1-1 [Brachypodium distachyon] >XP_010235986.1 PREDICTED: bet1-like SNARE 1-1 [Brachypodium distachyon] >KQK01417.1 hypothetical protein BRADI_3g55710 [Brachypodium distachyon]	SNARE domain	Bet1-like SNARE 1-1 OS=Arabidopsis thaliana GN=BET11 PE=1 SV=1	GO:0016021//integral component of membrane
CL15162.Contig2_All	K21843//tetratricopeptide repeat protein 7	XM_003579032.3 PREDICTED: Brachypodium distachyon uncharacterized LOC100821058 (LOC100821058), mRNA	predicted protein [Hordeum vulgare subsp. vulgare]	Tetratricopeptide repeat	Protein NPG1 OS=Arabidopsis thaliana GN=NPG1 PE=1 SV=1
CL1525.Contig8_All	K13172//serine/arginine repetitive matrix protein 2;K21867//potassium channel	AK370193.1 Hordeum vulgare subsp. vulgare mRNA for predicted protein, complete cds, clone: NIASHv2106J04	uncharacterized protein LOC109761946 [Aegilops tauschii subsp. tauschii]	Protein of unknown function (DUF1645)
CL10497.Contig4_All	K12627//U6 snRNA-associated Sm-like protein LSm8+ko03040//Spliceosome+ko03018//RNA degradation	XM_003567730.3 PREDICTED: Brachypodium distachyon sm-like protein LSM8 (LOC100838688), mRNA	sm-like protein LSM8 [Aegilops tauschii subsp. tauschii] >EMS54922.1 hypothetical protein TRIUR3_15166 [Triticum urartu] >EMT19214.1 hypothetical protein F775_30197 [Aegilops tauschii] >AMK08982.1 SMP [Triticum monococcum subsp. monococcum] >AMK08986.1 SMP [Triticum monococcum subsp. monococcum]	LSM domain	Sm-like protein LSM8 OS=Arabidopsis thaliana GN=LSM8 PE=1 SV=1	GO:0003723//RNA binding;GO:0000398//mRNA splicing, via spliceosome;GO:0005688//U6 snRNP;GO:0071011//precatalytic spliceosome;GO:0046540//U4/U6 x U5 tri-snRNP complex
CL712.Contig3_All	K06683//cell division control protein CDC15 [EC:2.7.11.1];K20606//mitogen-activated protein kinase kinase kinase ANP1 [EC:2.7.11.25]+ko04016//MAPK signaling pathway - plant	XM_010242253.2 PREDICTED: Brachypodium distachyon MAP3K epsilon protein kinase 1-like (LOC100822814), transcript variant X2, mRNA	PREDICTED: MAP3K epsilon protein kinase 1-like isoform X2 [Brachypodium distachyon]	Protein kinase domain	MAP3K epsilon protein kinase 1 OS=Arabidopsis thaliana GN=M3KE1 PE=1 SV=1	GO:0023014//signal transduction by protein phosphorylation;GO:0007346//regulation of mitotic cell cycle;GO:0004674//protein serine/threonine kinase activity;GO:0005524//ATP binding;GO:0032147//activation of protein kinase activity;GO:0031098//stress-activated protein kinase signaling cascade;GO:0005737//cytoplasm
CL1686.Contig4_All	K02469//DNA gyrase subunit A [EC:5.99.1.3];K12349//neutral ceramidase [EC:3.5.1.23]+ko00600//Sphingolipid metabolism+ko01100//Metabolic pathways		uncharacterized protein LOC110432892 [Sorghum bicolor]	Chromo (CHRromatin Organisation MOdifier) domain
Unigene41061_All		XM_020301440.1 PREDICTED: Aegilops tauschii subsp. tauschii tobamovirus multiplication protein 3-like (LOC109742351), mRNA	tobamovirus multiplication protein 3-like [Aegilops tauschii subsp. tauschii]	Protein of unknown function (DUF1084)	Tobamovirus multiplication protein 3 OS=Arabidopsis thaliana GN=TOM3 PE=1 SV=2	GO:0016021//integral component of membrane
Unigene37489_All	K19044//E3 ubiquitin-protein ligase XBAT32/33 [EC:2.3.2.27]	XM_020320805.1 PREDICTED: Aegilops tauschii subsp. tauschii probable E3 ubiquitin-protein ligase XBOS33 (LOC109761994), mRNA	predicted protein, partial [Hordeum vulgare subsp. vulgare]	Zinc finger, C3HC4 type (RING finger)	Probable E3 ubiquitin-protein ligase XBOS33 OS=Oryza sativa subsp. japonica GN=XBOS33 PE=2 SV=1	GO:0046872//metal ion binding;GO:0016567//protein ubiquitination;GO:0016740//transferase activity
Unigene61412_All			PREDICTED: uncharacterized protein LOC100834753 [Brachypodium distachyon] >KQJ84726.1 hypothetical protein BRADI_5g22452 [Brachypodium distachyon]
Unigene66203_All			PREDICTED: uncharacterized protein LOC4340034 [Oryza sativa Japonica Group] >XP_015640971.1 PREDICTED: uncharacterized protein LOC4340034 [Oryza sativa Japonica Group] >BAD68450.1 glycine-rich protein-like [Oryza sativa Japonica Group] >BAD68875.1 glycine-rich protein-like [Oryza sativa Japonica Group] >BAF18633.1 Os06g0134900 [Oryza sativa Japonica Group] >BAG95952.1 unnamed protein product [Ory…
CL15175.Contig21_All		FP097193.1 Phyllostachys edulis cDNA clone: bphylf049e02, full insert sequence	uncharacterized protein LOC109738950 [Aegilops tauschii subsp. tauschii] >EMT05097.1 hypothetical protein F775_32603 [Aegilops tauschii]			GO:0009535//chloroplast thylakoid membrane
Unigene57259_All		XM_010235551.2 PREDICTED: Brachypodium distachyon mediator of RNA polymerase II transcription subunit 33A-like (LOC100826944), transcript variant X2, mRNA	PREDICTED: mediator of RNA polymerase II transcription subunit 33A-like isoform X2 [Brachypodium distachyon] >KQK14607.1 hypothetical protein BRADI_1g17590 [Brachypodium distachyon]	Domain of unknown function (DUF4322)	Mediator of RNA polymerase II transcription subunit 33A OS=Arabidopsis thaliana GN=MED33A PE=1 SV=1
Unigene1222_All	K06627//cyclin-A;K14325//RNA-binding protein with serine-rich domain 1+ko03015//mRNA surveillance pathway+ko03013//RNA transport	AK371753.1 Hordeum vulgare subsp. vulgare mRNA for predicted protein, complete cds, clone: NIASHv2140P06	PREDICTED: uncharacterized protein LOC100841839 isoform X1 [Brachypodium distachyon] >KQK07939.1 hypothetical protein BRADI_2g38497 [Brachypodium distachyon]	Agenet domain	DUF724 domain-containing protein 3 OS=Arabidopsis thaliana GN=DUF3 PE=1 SV=1
CL11733.Contig2_All	K13172//serine/arginine repetitive matrix protein 2;K14325//RNA-binding protein with serine-rich domain 1+ko03015//mRNA surveillance pathway+ko03013//RNA transport	KY355618.1 Stipa breviflora microsatellite SB35 sequence	uncharacterized protein LOC109761932 [Aegilops tauschii subsp. tauschii]	Putative S-adenosyl-L-methionine-dependent methyltransferase	Serine/arginine-rich splicing factor SR45 OS=Arabidopsis thaliana GN=SR45 PE=1 SV=1	GO:0016021//integral component of membrane
CL15929.Contig2_All		FP098943.1 Phyllostachys edulis cDNA clone: bphyst028n23, full insert sequence	predicted protein, partial [Hordeum vulgare subsp. vulgare]	Transmembrane alpha-helix domain		GO:0016021//integral component of membrane
CL5556.Contig2_All	K03038//26S proteasome regulatory subunit N8+ko03050//Proteasome;K14325//RNA-binding protein with serine-rich domain 1+ko03015//mRNA surveillance pathway+ko03013//RNA transport	FP100975.1 Phyllostachys edulis cDNA clone: bphyem109d17, full insert sequence	uncharacterized protein LOC109750483 [Aegilops tauschii subsp. tauschii]		Serine/arginine-rich splicing factor SR45 OS=Arabidopsis thaliana GN=SR45 PE=1 SV=1
Unigene4875_All				GRF zinc finger	Vicilin-like seed storage protein At2g18540 OS=Arabidopsis thaliana GN=At2g18540 PE=3 SV=1
CL7452.Contig1_All	K15361//WD repeat-containing protein 48	AK250117.1 Hordeum vulgare subsp. vulgare cDNA clone: FLbaf69n15, mRNA sequence	PREDICTED: WD repeat-containing protein 48 [Brachypodium distachyon] >KQJ92121.1 hypothetical protein BRADI_4g41777 [Brachypodium distachyon]	Domain of unknown function (DUF3337)	Guanine nucleotide-binding protein subunit beta-like protein B OS=Oryza sativa subsp. japonica GN=RACK1B PE=1 SV=1	GO:0010311//lateral root formation
CL9599.Contig2_All	K09549//prefoldin subunit 2	XM_003577396.3 PREDICTED: Brachypodium distachyon probable prefoldin subunit 2 (LOC100835771), mRNA	PREDICTED: probable prefoldin subunit 2 [Brachypodium distachyon] >KQJ88174.1 hypothetical protein BRADI_4g16170 [Brachypodium distachyon]	Prefoldin subunit	Probable prefoldin subunit 2 OS=Arabidopsis thaliana GN=At3g22480 PE=2 SV=1	GO:0006457//protein folding;GO:0016272//prefoldin complex;GO:0051082//unfolded protein binding;GO:0044183//protein binding involved in protein folding;GO:0005737//cytoplasm
CL3948.Contig3_All	K02915//large subunit ribosomal protein L34e+ko03010//Ribosome	XM_020292102.1 PREDICTED: Aegilops tauschii subsp. tauschii 60S ribosomal protein L34 (LOC109732903), mRNA	hypothetical protein M569_00807, partial [Genlisea aurea]	Ribosomal protein L34e	Formin-like protein 14 OS=Arabidopsis thaliana GN=FH14 PE=3 SV=3
Unigene11627_All
Unigene1121_All	K22733//magnesium transporter	CP018162.1 Oryza sativa Indica Group cultivar Shuhui498 chromosome 6 sequence	PREDICTED: pentatricopeptide repeat-containing protein At5g08510 isoform X1 [Oryza sativa Japonica Group] >XP_015643516.1 PREDICTED: pentatricopeptide repeat-containing protein At5g08510 isoform X1 [Oryza sativa Japonica Group] >XP_015643517.1 PREDICTED: pentatricopeptide repeat-containing protein At5g08510 isoform X1 [Oryza sativa Japonica Group] >XP_015643519.1 PREDICTED: pentatricopeptide repe…	PPR repeat	Pentatricopeptide repeat-containing protein At5g08510 OS=Arabidopsis thaliana GN=PCMP-E20 PE=2 SV=1	GO:0043231//intracellular membrane-bounded organelle;GO:0003723//RNA binding;GO:0009451//RNA modification;GO:0004519//endonuclease activity
CL6140.Contig1_All	K07119//uncharacterized protein;K19825//2-alkenal reductase (NADP+) [EC:1.3.1.102]	XM_003578718.3 PREDICTED: Brachypodium distachyon 2-alkenal reductase (NADP(+)-dependent)-like (LOC100828644), mRNA	hypothetical protein BRADI_4g39987 [Brachypodium distachyon]	N-terminal domain of oxidoreductase	2-alkenal reductase (NADP(+)-dependent) OS=Nicotiana tabacum GN=DBR PE=1 SV=1
CL12449.Contig3_All	K05396//D-cysteine desulfhydrase [EC:4.4.1.15]+ko00270//Cysteine and methionine metabolism	AK331465.1 Triticum aestivum cDNA, clone: WT007_J02, cultivar: Chinese Spring	unnamed protein product [Triticum aestivum] >CDM83861.1 unnamed protein product [Triticum aestivum]	Pyridoxal-phosphate dependent enzyme	D-cysteine desulfhydrase 2, mitochondrial OS=Arabidopsis thaliana GN=At3g26115 PE=2 SV=1	GO:0005739//mitochondrion;GO:0019148//D-cysteine desulfhydrase activity
CL1686.Contig8_All	K02469//DNA gyrase subunit A [EC:5.99.1.3];K12349//neutral ceramidase [EC:3.5.1.23]+ko00600//Sphingolipid metabolism+ko01100//Metabolic pathways	FP092530.1 Phyllostachys edulis cDNA clone: bphylf030m21, full insert sequence	PREDICTED: transposon Ty3-G Gag-Pol polyprotein [Setaria italica]	Chromo (CHRromatin Organisation MOdifier) domain	Protein BOLA4, chloroplastic/mitochondrial OS=Arabidopsis thaliana GN=BOLA4 PE=1 SV=1
CL2372.Contig13_All		XR_001405237.1 PREDICTED: Brachypodium distachyon WD repeat-containing protein 7 (LOC100838541), transcript variant X11, misc_RNA	hypothetical protein BRADI_1g39938 [Brachypodium distachyon] >KQK18251.1 hypothetical protein BRADI_1g39938 [Brachypodium distachyon] >KQK18252.1 hypothetical protein BRADI_1g39938 [Brachypodium distachyon] >KQK18253.1 hypothetical protein BRADI_1g39938 [Brachypodium distachyon] >KQK18255.1 hypothetical protein BRADI_1g39938 [Brachypodium distachyon] >KQK18256.1 hypothetical protein BRADI_1g39938…	WD domain, G-beta repeat
Unigene65327_All	K00876//uridine kinase [EC:2.7.1.48]+ko01100//Metabolic pathways+ko00240//Pyrimidine metabolism	XM_020310966.1 PREDICTED: Aegilops tauschii subsp. tauschii uridine kinase-like protein 3 (LOC109752101), mRNA	PREDICTED: uridine kinase-like protein 3 [Brachypodium distachyon] >KQJ91495.1 hypothetical protein BRADI_4g38030 [Brachypodium distachyon]	Otopetrin	Uridine kinase-like protein 3 OS=Arabidopsis thaliana GN=UKL3 PE=2 SV=1	GO:0004849//uridine kinase activity;GO:0005524//ATP binding;GO:0005829//cytosol;GO:0043097//pyrimidine nucleoside salvage;GO:0006206//pyrimidine nucleobase metabolic process;GO:0044206//UMP salvage;GO:0044211//CTP salvage
CL1605.Contig3_All	K07195//exocyst complex component 7	XM_003568208.3 PREDICTED: Brachypodium distachyon exocyst complex component EXO70B1-like (LOC100826541), mRNA	exocyst complex component EXO70B1-like [Aegilops tauschii subsp. tauschii]	Exo70 exocyst complex subunit	Exocyst complex component EXO70B1 OS=Arabidopsis thaliana GN=EXO70B1 PE=1 SV=1	GO:0000145//exocyst;GO:0006887//exocytosis
Unigene46956_All
CL9891.Contig5_All	K02986//small subunit ribosomal protein S4+ko03010//Ribosome	XM_003577759.3 PREDICTED: Brachypodium distachyon probable alkaline/neutral invertase F (LOC100842899), mRNA	probable alkaline/neutral invertase F [Aegilops tauschii subsp. tauschii]	Alkaline and neutral invertase	Probable alkaline/neutral invertase F OS=Arabidopsis thaliana GN=INVF PE=2 SV=1	GO:0033926//glycopeptide alpha-N-acetylgalactosaminidase activity;GO:0005829//cytosol
CL12932.Contig2_All	K13171//serine/arginine repetitive matrix protein 1+ko03015//mRNA surveillance pathway+ko03013//RNA transport;K13172//serine/arginine repetitive matrix protein 2	AK369475.1 Hordeum vulgare subsp. vulgare mRNA for predicted protein, complete cds, clone: NIASHv2092C04	predicted protein [Hordeum vulgare subsp. vulgare] >BAJ87366.1 predicted protein [Hordeum vulgare subsp. vulgare] >BAJ88428.1 predicted protein [Hordeum vulgare subsp. vulgare] >BAK00676.1 predicted protein [Hordeum vulgare subsp. vulgare]	Lung seven transmembrane receptor	Serine/arginine-rich splicing factor SR45 OS=Arabidopsis thaliana GN=SR45 PE=1 SV=1
CL17028.Contig21_All		XM_014895910.1 PREDICTED: Brachypodium distachyon mitochondrial fission protein ELM1-like (LOC100839773), transcript variant X1, mRNA	mitochondrial fission protein ELM1-like isoform X2 [Aegilops tauschii subsp. tauschii]	Mitochondrial fission ELM1	Mitochondrial fission protein ELM1 OS=Arabidopsis thaliana GN=ELM1 PE=1 SV=1
CL9009.Contig13_All	K17964//leucine-rich PPR motif-containing protein, mitochondrial	AK373541.1 Hordeum vulgare subsp. vulgare mRNA for predicted protein, complete cds, clone: NIASHv3034G21	DA2, partial [Triticum aestivum]	Protein DA1	Protein DA1-related 2 OS=Arabidopsis thaliana GN=DAR2 PE=2 SV=1
CL1745.Contig26_All	K07767//katanin p60 ATPase-containing subunit A1 [EC:3.6.4.3]	XM_020293216.1 PREDICTED: Aegilops tauschii subsp. tauschii katanin p60 ATPase-containing subunit A-like 2 (LOC109734004), mRNA	katanin p60 ATPase-containing subunit A-like 2 [Aegilops tauschii subsp. tauschii]	ATPase family associated with various cellular activities (AAA)	Katanin p60 ATPase-containing subunit A1 OS=Arabidopsis thaliana GN=AAA1 PE=1 SV=1	GO:0005634//nucleus;GO:0005524//ATP binding
CL13948.Contig1_All		CP018168.1 Oryza sativa Indica Group cultivar Shuhui498 chromosome 12 sequence
CL2704.Contig11_All	K03678//exosome complex component RRP45+ko03018//RNA degradation	XM_010237220.2 PREDICTED: Brachypodium distachyon protein RRP45A-like (LOC100832261), transcript variant X1, mRNA	PREDICTED: protein RRP45A-like isoform X1 [Brachypodium distachyon] >KQJ99835.1 hypothetical protein BRADI_3g45490 [Brachypodium distachyon]	3' exoribonuclease family, domain 1	Exosome complex component RRP45B OS=Arabidopsis thaliana GN=RRP45B PE=2 SV=1	GO:0034473//U1 snRNA 3'-end processing;GO:0043928//exonucleolytic nuclear-transcribed mRNA catabolic process involved in deadenylation-dependent decay;GO:0017091//AU-rich element binding;GO:0034427//nuclear-transcribed mRNA catabolic process, exonucleolytic, 3'-5';GO:0000176//nuclear exosome (RNase complex);GO:0034476//U5 snRNA 3'-end processing;GO:0071028//nuclear mRNA surveillance;GO:0000467//e…
CL16583.Contig9_All	K17710//pentatricopeptide repeat domain-containing protein 1;K17964//leucine-rich PPR motif-containing protein, mitochondrial	XM_014901590.1 PREDICTED: Brachypodium distachyon pentatricopeptide repeat-containing protein At5g14770, mitochondrial (LOC100843166), transcript variant X19, mRNA	PREDICTED: pentatricopeptide repeat-containing protein At5g14770, mitochondrial [Brachypodium distachyon] >XP_014757059.1 PREDICTED: pentatricopeptide repeat-containing protein At5g14770, mitochondrial [Brachypodium distachyon] >XP_014757060.1 PREDICTED: pentatricopeptide repeat-containing protein At5g14770, mitochondrial [Brachypodium distachyon] >XP_014757061.1 PREDICTED: pentatricopeptide repe…	PPR repeat family	Pentatricopeptide repeat-containing protein At5g14770, mitochondrial OS=Arabidopsis thaliana GN=At5g14770 PE=3 SV=2	GO:0043231//intracellular membrane-bounded organelle;GO:0003723//RNA binding;GO:0009451//RNA modification;GO:0004519//endonuclease activity
CL3194.Contig24_All		XM_020330278.1 PREDICTED: Aegilops tauschii subsp. tauschii uncharacterized LOC109771575 (LOC109771575), mRNA	hypothetical protein TRIUR3_12336 [Triticum urartu]
CL13665.Contig6_All	K02115//F-type H+-transporting ATPase subunit gamma+ko01100//Metabolic pathways+ko00190//Oxidative phosphorylation+ko00195//Photosynthesis	XM_015775740.1 PREDICTED: Oryza sativa Japonica Group uncharacterized LOC4333696 (LOC4333696), transcript variant X3, mRNA	PREDICTED: uncharacterized protein LOC100833724 [Brachypodium distachyon] >XP_010237671.1 PREDICTED: uncharacterized protein LOC100833724 [Brachypodium distachyon] >KQJ88273.1 hypothetical protein BRADI_4g16700 [Brachypodium distachyon] >KQJ88274.1 hypothetical protein BRADI_4g16700 [Brachypodium distachyon] >KQJ88275.1 hypothetical protein BRADI_4g16700 [Brachypodium distachyon]	Myb-like DNA-binding domain
Unigene39042_All	K09510//DnaJ homolog subfamily B member 4	XM_010232376.2 PREDICTED: Brachypodium distachyon dnaJ homolog subfamily B member 1 (LOC100821797), mRNA	PREDICTED: dnaJ homolog subfamily B member 4 [Setaria italica] >KQL03184.1 hypothetical protein SETIT_002113mg [Setaria italica]	DnaJ C terminal domain	DnaJ protein homolog ANJ1 OS=Atriplex nummularia PE=2 SV=1	GO:0006457//protein folding;GO:0051082//unfolded protein binding
Unigene29574_All
CL7237.Contig3_All	K06085//synovial sarcoma, X breakpoint 2 interacting protein	XM_020329073.1 PREDICTED: Aegilops tauschii subsp. tauschii afadin- and alpha-actinin-binding protein-like (LOC109770370), transcript variant X2, mRNA	afadin- and alpha-actinin-binding protein-like isoform X2 [Aegilops tauschii subsp. tauschii]	Afadin- and alpha -actinin-Binding
Unigene48808_All	K14486//auxin response factor+ko04075//Plant hormone signal transduction	AK100322.1 Oryza sativa Japonica Group cDNA clone:J023079H12, full insert sequence	PREDICTED: auxin response factor 18-like [Brachypodium distachyon] >KQK17233.1 hypothetical protein BRADI_1g33160 [Brachypodium distachyon]	Auxin response factor	Auxin response factor 18 OS=Oryza sativa subsp. japonica GN=ARF18 PE=2 SV=1	GO:0003677//DNA binding;GO:0005634//nucleus;GO:0006355//regulation of transcription, DNA-templated;GO:0009734//auxin-activated signaling pathway;GO:0006351//transcription, DNA-templated
Unigene39521_All
CL936.Contig28_All	K19984//exocyst complex component 5;K02184//formin 2	XM_003559964.3 PREDICTED: Brachypodium distachyon outer envelope pore protein 24, chloroplastic (LOC100834363), mRNA	hypothetical protein VOLCADRAFT_104492 [Volvox carteri f. nagariensis] >EFJ49051.1 hypothetical protein VOLCADRAFT_104492 [Volvox carteri f. nagariensis]		Outer envelope pore protein 24, chloroplastic OS=Oryza sativa subsp. indica GN=OEP24 PE=3 SV=1	GO:0016021//integral component of membrane
CL3434.Contig9_All	K13210//far upstream element-binding protein	XM_003571706.2 PREDICTED: Brachypodium distachyon far upstream element-binding protein 1 (LOC100835547), mRNA	PREDICTED: far upstream element-binding protein 1 [Brachypodium distachyon] >KQJ94090.1 hypothetical protein BRADI_3g08410 [Brachypodium distachyon]	KH domain	RNA-binding KH domain-containing protein PEPPER OS=Arabidopsis thaliana GN=PEP PE=1 SV=1	GO:0003729//mRNA binding;GO:0005829//cytosol
CL14924.Contig5_All	K10845//TFIIH basal transcription factor complex TTD-A subunit+ko03420//Nucleotide excision repair+ko03022//Basal transcription factors	FP096563.1 Phyllostachys edulis cDNA clone: bphyst036i19, full insert sequence	hypothetical protein BRADI_2g39330, partial [Brachypodium distachyon]		RNA polymerase II transcription factor B subunit 5 OS=Arabidopsis thaliana GN=TFB5 PE=3 SV=1	GO:0006355//regulation of transcription, DNA-templated;GO:0006289//nucleotide-excision repair;GO:0000439//core TFIIH complex
CL2751.Contig1_All	K03953//NADH dehydrogenase (ubiquinone) 1 alpha subcomplex subunit 9+ko01100//Metabolic pathways+ko00190//Oxidative phosphorylation	XM_003570345.3 PREDICTED: Brachypodium distachyon NADH dehydrogenase [ubiquinone] 1 alpha subcomplex subunit 9, mitochondrial (LOC100831041), mRNA	PREDICTED: NADH dehydrogenase [ubiquinone] 1 alpha subcomplex subunit 9, mitochondrial [Brachypodium distachyon] >KQK01351.1 hypothetical protein BRADI_3g55340 [Brachypodium distachyon]	NAD dependent epimerase/dehydratase family	NADH dehydrogenase [ubiquinone] 1 alpha subcomplex subunit 9, mitochondrial OS=Arabidopsis thaliana GN=At2g20360 PE=1 SV=2	GO:0003954//NADH dehydrogenase activity;GO:1901006//ubiquinone-6 biosynthetic process
Unigene14561_All
CL8491.Contig15_All	K12811//ATP-dependent RNA helicase DDX46/PRP5 [EC:3.6.4.13]+ko03040//Spliceosome	XM_010233659.1 PREDICTED: Brachypodium distachyon DEAD-box ATP-dependent RNA helicase 42-like (LOC100846703), transcript variant X2, mRNA	DEAD-box ATP-dependent RNA helicase 42-like [Aegilops tauschii subsp. tauschii] >XP_020158783.1 DEAD-box ATP-dependent RNA helicase 42-like [Aegilops tauschii subsp. tauschii] >EMT07306.1 DEAD-box ATP-dependent RNA helicase 42 [Aegilops tauschii]		DEAD-box ATP-dependent RNA helicase 42 OS=Oryza sativa subsp. japonica GN=Os08g0159900 PE=2 SV=1	GO:0010468//regulation of gene expression;GO:0003723//RNA binding;GO:0000398//mRNA splicing, via spliceosome;GO:0005524//ATP binding;GO:0005737//cytoplasm;GO:0003676//nucleic acid binding;GO:0005730//nucleolus;GO:0004004//ATP-dependent RNA helicase activity;GO:0010501//RNA secondary structure unwinding
CL1307.Contig17_All	K11099//small nuclear ribonucleoprotein G+ko03040//Spliceosome	FP098246.1 Phyllostachys edulis cDNA clone: bphyst016a07, full insert sequence	PREDICTED: U6 snRNA-associated Sm-like protein LSm7, partial [Oryza brachyantha]
CL5718.Contig2_All	K07890//Ras-related protein Rab-21	CT833194.1 Oryza sativa (indica cultivar-group) cDNA clone:OSIGCSA060B10, full insert sequence	PREDICTED: ras-related protein Rab-21-like [Oryza brachyantha]		Ras-related protein RABF1 OS=Arabidopsis thaliana GN=RABF1 PE=1 SV=1	GO:0030100//regulation of endocytosis;GO:0005525//GTP binding;GO:0005769//early endosome;GO:0003924//GTPase activity
CL7177.Contig9_All	K15891//NAD+-dependent farnesol dehydrogenase [EC:1.1.1.354]+ko00900//Terpenoid backbone biosynthesis+ko00909//Sesquiterpenoid and triterpenoid biosynthesis	AK065264.1 Oryza sativa Japonica Group cDNA clone:J013002K08, full insert sequence	dihydroflavonol-4-reductase [Zea mays] >NP_001334818.1 dihydroflavonol-4-reductase [Zea mays] >ACF80477.1 unknown [Zea mays] >ACF84688.1 unknown [Zea mays] >ACG36905.1 dihydroflavonol-4-reductase [Zea mays] >ONL94347.1 NAD(P)-binding Rossmann-fold superfamily protein [Zea mays] >ONL94348.1 NAD(P)-binding Rossmann-fold superfamily protein [Zea mays]	NAD(P)H-binding	Cinnamoyl-CoA reductase 1 OS=Oryza sativa subsp. japonica GN=CCR1 PE=1 SV=1	GO:0005783//endoplasmic reticulum;GO:0003824//catalytic activity;GO:0005774//vacuolar membrane;GO:0016487//farnesol metabolic process;GO:0009788//negative regulation of abscisic acid-activated signaling pathway;GO:0005886//plasma membrane;GO:0047886//farnesol dehydrogenase activity;GO:0050662//coenzyme binding
CL15113.Contig1_All	K11323//histone arginine demethylase JMJD6 [EC:1.14.11.-];K14306//nuclear pore complex protein Nup62+ko03013//RNA transport	XM_020325047.1 PREDICTED: Aegilops tauschii subsp. tauschii uncharacterized LOC109766281 (LOC109766281), mRNA	hypothetical protein PAHAL_G00306 [Panicum hallii]	Protein of unknown function, DUF538
CL14906.Contig1_All		XM_003579509.3 PREDICTED: Brachypodium distachyon ER membrane protein complex subunit 8/9 homolog (LOC100841998), mRNA	predicted protein [Hordeum vulgare subsp. vulgare] >BAK02505.1 predicted protein [Hordeum vulgare subsp. vulgare]		ER membrane protein complex subunit 8/9 homolog OS=Arabidopsis thaliana GN=EMB2731 PE=2 SV=1	GO:0072546//ER membrane protein complex
Unigene49086_All	K15559//regulator of Ty1 transposition protein 103	FP091418.1 Phyllostachys edulis cDNA clone: bphyem207i14, full insert sequence	predicted protein [Hordeum vulgare subsp. vulgare]	RNA polymerase II-binding domain.	Sulfated surface glycoprotein 185 OS=Volvox carteri PE=1 SV=1
CL1972.Contig4_All	K13172//serine/arginine repetitive matrix protein 2	XM_003570418.3 PREDICTED: Brachypodium distachyon uncharacterized LOC100827890 (LOC100827890), mRNA	PREDICTED: uncharacterized protein LOC100827890 [Brachypodium distachyon] >KQK01517.1 hypothetical protein BRADI_3g56370 [Brachypodium distachyon]	BSD domain	Early nodulin-20 OS=Medicago truncatula GN=ENOD20 PE=3 SV=1
Unigene53881_All	K22763//deubiquitinase DESI2 [EC:3.4.19.12]	XM_003574201.3 PREDICTED: Brachypodium distachyon desumoylating isopeptidase 2 (LOC100846937), mRNA	PREDICTED: desumoylating isopeptidase 2 [Brachypodium distachyon] >KQJ97577.1 hypothetical protein BRADI_3g32010 [Brachypodium distachyon]	PRA1 family protein
CL11129.Contig2_All	K20293//conserved oligomeric Golgi complex subunit 6	XM_003558400.3 PREDICTED: Brachypodium distachyon conserved oligomeric Golgi complex subunit 6 (LOC100844711), mRNA	predicted protein [Hordeum vulgare subsp. vulgare]	Conserved oligomeric complex COG6		GO:0005829//cytosol;GO:0017119//Golgi transport complex;GO:0006891//intra-Golgi vesicle-mediated transport
CL350.Contig8_All	K20547//basic endochitinase B [EC:3.2.1.14]+ko04016//MAPK signaling pathway - plant+ko00520//Amino sugar and nucleotide sugar metabolism+ko01100//Metabolic pathways;K02184//formin 2	FP100357.1 Phyllostachys edulis cDNA clone: bphylf045j09, full insert sequence	protein transport protein SFT2-like [Aegilops tauschii subsp. tauschii]	Got1/Sft2-like family	Leucine-rich repeat extensin-like protein 3 OS=Arabidopsis thaliana GN=LRX3 PE=1 SV=1	GO:0016021//integral component of membrane;GO:0015031//protein transport;GO:0016192//vesicle-mediated transport
CL2754.Contig12_All	K12603//CCR4-NOT transcription complex subunit 6 [EC:3.1.13.4]+ko03018//RNA degradation	KF427330.1 Phyllostachys nigra var. henonis voucher MPF10172 (KUN) zinc finger-like protein gene, partial cds	hypothetical protein L484_005170 [Morus notabilis] >EXB53620.1 hypothetical protein L484_005170 [Morus notabilis]	Phosphoinositide 3-kinase gamma adapter protein p101 subunit	Protein PHOTOSYSTEM I ASSEMBLY 2, chloroplastic OS=Oryza sativa subsp. japonica GN=PSA2 PE=2 SV=1
CL7228.Contig6_All	K22736//vacuolar iron transporter family protein	XM_010236838.2 PREDICTED: Brachypodium distachyon vacuolar fusion protein CCZ1 homolog (LOC100846835), transcript variant X1, mRNA	PREDICTED: uncharacterized protein LOC100846835 isoform X1 [Brachypodium distachyon]	Fungal domain of unknown function (DUF1712)	Vacuolar fusion protein CCZ1 homolog OS=Oryza sativa subsp. japonica GN=CCZ1 PE=2 SV=1
Unigene87434_All	K02133//F-type H+-transporting ATPase subunit beta [EC:3.6.3.14]+ko01100//Metabolic pathways+ko00190//Oxidative phosphorylation	XR_001405164.1 PREDICTED: Brachypodium distachyon uncharacterized LOC100822618 (LOC100822618), transcript variant X3, misc_RNA	PREDICTED: uncharacterized protein LOC100822618 [Brachypodium distachyon]
CL5920.Contig5_All	K11655//bromodomain adjacent to zinc finger domain protein 1A;K07300//Ca2+:H+ antiporter	XM_015767689.1 PREDICTED: Oryza sativa Japonica Group DDT domain-containing protein DDB_G0282237 (LOC4329669), transcript variant X1, mRNA	PREDICTED: DDT domain-containing protein DDB_G0282237-like [Brachypodium distachyon] >KQJ99891.1 hypothetical protein BRADI_3g45850 [Brachypodium distachyon]	ATP-utilising chromatin assembly and remodelling N-terminal	Homeobox-DDT domain protein RLT1 OS=Arabidopsis thaliana GN=RLT1 PE=1 SV=1	GO:0005634//nucleus
CL11131.Contig6_All	K22748//histone-lysine N-methyltransferase ATXR3 [EC:2.1.1.43]+ko00310//Lysine degradation	XM_014899553.1 PREDICTED: Brachypodium distachyon uncharacterized LOC100835411 (LOC100835411), mRNA	PREDICTED: uncharacterized protein LOC100835411 [Brachypodium distachyon] >KQK09733.1 hypothetical protein BRADI_2g49840 [Brachypodium distachyon]	Protein of unknown function (DUF616)		GO:0016021//integral component of membrane
Unigene6051_All	K01535//H+-transporting ATPase [EC:3.6.3.6]+ko00190//Oxidative phosphorylation	XM_003580682.3 PREDICTED: Brachypodium distachyon plasma membrane ATPase (LOC100846063), mRNA	plasma membrane ATPase isoform X2 [Aegilops tauschii subsp. tauschii] >EMT26270.1 Plasma membrane ATPase [Aegilops tauschii]	haloacid dehalogenase-like hydrolase	Plasma membrane ATPase OS=Oryza sativa subsp. japonica GN=Os04g0656100 PE=2 SV=1	GO:0006754//ATP biosynthetic process;GO:0005524//ATP binding;GO:0016021//integral component of membrane;GO:0008553//hydrogen-exporting ATPase activity, phosphorylative mechanism
CL10393.Contig3_All	K17604//zinc finger SWIM domain-containing protein 3	XM_014896720.1 PREDICTED: Brachypodium distachyon protein FAR1-RELATED SEQUENCE 6-like (LOC100842103), mRNA	PREDICTED: protein FAR1-RELATED SEQUENCE 6-like [Brachypodium distachyon] >KQK22518.1 hypothetical protein BRADI_1g67770 [Brachypodium distachyon]	MULE transposase domain	Protein FAR1-RELATED SEQUENCE 5 OS=Arabidopsis thaliana GN=FRS5 PE=1 SV=1	GO:0006355//regulation of transcription, DNA-templated;GO:0008270//zinc ion binding
CL15005.Contig1_All	K20043//clathrin coat assembly protein AP180;K09326//homeobox protein OTX1;K04733//interleukin-1 receptor-associated kinase 4 [EC:2.7.11.1];K16222//Dof zinc finger protein DOF5.5+ko04712//Circadian rhythm - plant	FP094632.1 Phyllostachys edulis cDNA clone: bphylf047i12, full insert sequence	dof zinc finger protein DOF5.4-like [Aegilops tauschii subsp. tauschii]	Dof domain, zinc finger	Dof zinc finger protein DOF2.4 OS=Arabidopsis thaliana GN=DOF2.4 PE=2 SV=1	GO:0003677//DNA binding;GO:0005634//nucleus;GO:0006355//regulation of transcription, DNA-templated
CL7204.Contig7_All	K15285//solute carrier family 35, member E3	AK364864.1 Hordeum vulgare subsp. vulgare mRNA for predicted protein, complete cds, clone: NIASHv2028O14	PREDICTED: probable sugar phosphate/phosphate translocator At3g17430 [Brachypodium distachyon] >KQK13545.1 hypothetical protein BRADI_1g10870 [Brachypodium distachyon]	Triose-phosphate Transporter family	Probable sugar phosphate/phosphate translocator At1g48230 OS=Arabidopsis thaliana GN=At1g48230 PE=2 SV=2	GO:0016021//integral component of membrane
CL4164.Contig4_All	K15032//mTERF domain-containing protein, mitochondrial	XM_003568432.3 PREDICTED: Brachypodium distachyon uncharacterized LOC100843561 (LOC100843561), mRNA	PREDICTED: uncharacterized protein LOC101763760 [Setaria italica] >KQL15563.1 hypothetical protein SETIT_021844mg [Setaria italica]	mTERF	Transcription termination factor MTERF4, chloroplastic OS=Arabidopsis thaliana GN=MTERF4 PE=1 SV=1	GO:0042794//rRNA transcription from plastid promoter;GO:0006355//regulation of transcription, DNA-templated;GO:0008380//RNA splicing;GO:0009536//plastid;GO:0003690//double-stranded DNA binding;GO:0009793//embryo development ending in seed dormancy
CL15290.Contig2_All	K17496//mitochondrial import inner membrane translocase subunit TIM50	XM_003569825.3 PREDICTED: Brachypodium distachyon mitochondrial import inner membrane translocase subunit TIM50-like (LOC100828696), mRNA	PREDICTED: mitochondrial import inner membrane translocase subunit TIM50-like [Brachypodium distachyon]	NLI interacting factor-like phosphatase	Mitochondrial import inner membrane translocase subunit TIM50 OS=Arabidopsis thaliana GN=TIM50 PE=1 SV=1	GO:0005744//mitochondrial inner membrane presequence translocase complex;GO:0004721//phosphoprotein phosphatase activity;GO:0015031//protein transport;GO:0030150//protein import into mitochondrial matrix
Unigene38768_All
CL7892.Contig2_All		XM_003573849.3 PREDICTED: Brachypodium distachyon ER membrane protein complex subunit 2-A-like (LOC100840337), mRNA	hypothetical protein BRADI_3g02650 [Brachypodium distachyon]
CL3699.Contig25_All	K15378//solute carrier family 45, member 1/2/4	XM_015777688.1 PREDICTED: Oryza sativa Japonica Group sucrose transport protein SUT1 (LOC4331775), transcript variant X2, mRNA	sucrose transport protein SUT1-like [Aegilops tauschii subsp. tauschii] >AAL90455.1 sucrose transporter SUT1D [Triticum aestivum] >AAM13410.1 sucrose transporter SUT1D [Triticum aestivum]	Nucleoside recognition	Sucrose transport protein SUT1 OS=Oryza sativa subsp. indica GN=SUT1 PE=3 SV=1	GO:0009846//pollen germination;GO:0042950//salicin transmembrane transporter activity;GO:0009705//plant-type vacuole membrane;GO:0005364//maltose:proton symporter activity;GO:0005887//integral component of plasma membrane;GO:0008506//sucrose:proton symporter activity
CL7358.Contig1_All	K00611//ornithine carbamoyltransferase [EC:2.1.3.3]+ko00220//Arginine biosynthesis+ko01230//Biosynthesis of amino acids+ko01100//Metabolic pathways+ko01110//Biosynthesis of secondary metabolites	FP096903.1 Phyllostachys edulis cDNA clone: bphyem209i21, full insert sequence	ornithine carbamoyltransferase, chloroplastic [Aegilops tauschii subsp. tauschii]	Aspartate/ornithine carbamoyltransferase, Asp/Orn binding domain	Ornithine carbamoyltransferase, chloroplastic OS=Pisum sativum GN=ARGF PE=2 SV=1	GO:0043231//intracellular membrane-bounded organelle;GO:0016597//amino acid binding;GO:0042450//arginine biosynthetic process via ornithine;GO:0004585//ornithine carbamoyltransferase activity;GO:0000050//urea cycle;GO:0005737//cytoplasm;GO:0009570//chloroplast stroma
CL8485.Contig6_All	K15191//La-related protein 7;K01534//Cd2+/Zn2+-exporting ATPase [EC:3.6.3.3 3.6.3.5]	XM_020326713.1 PREDICTED: Aegilops tauschii subsp. tauschii cysteine-rich and transmembrane domain-containing protein A-like (LOC109767973), mRNA	PREDICTED: cysteine-rich and transmembrane domain-containing protein A [Oryza sativa Japonica Group] >BAF25546.1 Os09g0510000 [Oryza sativa Japonica Group]	Wnt and FGF inhibitory regulator		GO:0003006//developmental process involved in reproduction;GO:0005886//plasma membrane
CL10588.Contig2_All	K17710//pentatricopeptide repeat domain-containing protein 1;K17964//leucine-rich PPR motif-containing protein, mitochondrial	XM_014897995.1 PREDICTED: Brachypodium distachyon putative pentatricopeptide repeat-containing protein At5g08310, mitochondrial (LOC100843958), transcript variant X2, mRNA	PREDICTED: putative pentatricopeptide repeat-containing protein At5g08310, mitochondrial [Brachypodium distachyon] >XP_014753481.1 PREDICTED: putative pentatricopeptide repeat-containing protein At5g08310, mitochondrial [Brachypodium distachyon] >KQK06909.1 hypothetical protein BRADI_2g31210 [Brachypodium distachyon] >KQK06910.1 hypothetical protein BRADI_2g31210 [Brachypodium distachyon]	PPR repeat family	Pentatricopeptide repeat-containing protein At4g19440, chloroplastic OS=Arabidopsis thaliana GN=At4g19440 PE=2 SV=2	GO:0043231//intracellular membrane-bounded organelle;GO:0003723//RNA binding;GO:0009451//RNA modification;GO:0004519//endonuclease activity
CL15100.Contig6_All	K04523//ubiquilin+ko04141//Protein processing in endoplasmic reticulum	XM_003558841.3 PREDICTED: Brachypodium distachyon ubiquitin domain-containing protein DSK2a-like (LOC100825650), mRNA	PREDICTED: ubiquitin domain-containing protein DSK2a-like [Brachypodium distachyon] >KQK23813.1 hypothetical protein BRADI_1g76321 [Brachypodium distachyon]	Ubiquitin family	Ubiquitin domain-containing protein DSK2b OS=Arabidopsis thaliana GN=DSK2B PE=1 SV=1
CL1699.Contig10_All	K08592//sentrin-specific protease 1 [EC:3.4.22.68]	XM_003557887.3 PREDICTED: Brachypodium distachyon putative ubiquitin-like-specific protease 1B (LOC100842374), transcript variant X1, mRNA	PREDICTED: putative ubiquitin-like-specific protease 1B isoform X1 [Brachypodium distachyon] >KQK21735.1 hypothetical protein BRADI_1g62760 [Brachypodium distachyon]	Ulp1 protease family, C-terminal catalytic domain	Ubiquitin-like-specific protease ESD4 OS=Arabidopsis thaliana GN=ESD4 PE=1 SV=1	GO:0004175//endopeptidase activity;GO:0005634//nucleus;GO:0008234//cysteine-type peptidase activity;GO:0016926//protein desumoylation
CL1314.Contig31_All	K07936//GTP-binding nuclear protein Ran+ko03013//RNA transport+ko03008//Ribosome biogenesis in eukaryotes	FJ610236.1 Festuca arundinacea Ran-related GTP-binding protein mRNA, complete cds	PREDICTED: GTP-binding nuclear protein Ran-2 [Oryza brachyantha] >XP_015639466.1 PREDICTED: GTP-binding nuclear protein Ran-2 [Oryza sativa Japonica Group] >Q7GD79.1 RecName: Full=GTP-binding nuclear protein Ran-2; Short=OsRan2; AltName: Full=Ras-related nuclear protein 2 >A2Y7R5.1 RecName: Full=GTP-binding nuclear protein Ran-2; Short=OsRan2; AltName: Full=Ras-related nuclear protein 2 >BAA81911…		GTP-binding nuclear protein Ran-2 OS=Oryza sativa subsp. japonica GN=RAN2 PE=2 SV=1	GO:0005634//nucleus;GO:0000054//ribosomal subunit export from nucleus;GO:0005737//cytoplasm;GO:0003924//GTPase activity;GO:0006913//nucleocytoplasmic transport;GO:0006606//protein import into nucleus;GO:0005525//GTP binding;GO:0015031//protein transport
CL6854.Contig2_All			hypothetical protein BRADI_3g32244, partial [Brachypodium distachyon]
CL5347.Contig16_All	K07199//5'-AMP-activated protein kinase, regulatory beta subunit	XM_010235478.2 PREDICTED: Brachypodium distachyon protein PTST, chloroplastic (LOC100836774), transcript variant X3, mRNA	hypothetical protein TRIUR3_17676 [Triticum urartu]		Protein PTST, chloroplastic OS=Arabidopsis thaliana GN=PTST PE=1 SV=1
CL3986.Contig3_All	K02184//formin 2;K21952//CASK-interacting protein	XM_010239382.2 PREDICTED: Brachypodium distachyon uncharacterized LOC100830867 (LOC100830867), transcript variant X1, mRNA	uncharacterized protein LOC109751206 [Aegilops tauschii subsp. tauschii]	Signal recognition particle, alpha subunit, N-terminal	Proline-rich receptor-like protein kinase PERK2 OS=Arabidopsis thaliana GN=PERK2 PE=2 SV=3
CL6429.Contig1_All
CL3683.Contig2_All	K20547//basic endochitinase B [EC:3.2.1.14]+ko04016//MAPK signaling pathway - plant+ko00520//Amino sugar and nucleotide sugar metabolism+ko01100//Metabolic pathways	AK368746.1 Hordeum vulgare subsp. vulgare mRNA for predicted protein, complete cds, clone: NIASHv2079B05	PREDICTED: basic proline-rich protein-like, partial [Oryza sativa Japonica Group]	Family of unknown function (DUF566)	Chaperonin-like RbcX protein 2, chloroplastic OS=Arabidopsis thaliana GN=RBCX2 PE=1 SV=1
CL14608.Contig2_All	K16222//Dof zinc finger protein DOF5.5+ko04712//Circadian rhythm - plant	AK358805.1 Hordeum vulgare subsp. vulgare mRNA for predicted protein, complete cds, clone: NIASHv1083I10	salt stress protein 4 [Triticum aestivum]	Dof domain, zinc finger	Cyclic dof factor 5 OS=Arabidopsis thaliana GN=CDF5 PE=2 SV=1
CL6586.Contig5_All	K18183//cytochrome c oxidase assembly protein subunit 19	XM_014898828.1 PREDICTED: Brachypodium distachyon cytochrome c oxidase assembly protein COX19-like (LOC100835527), transcript variant X3, mRNA	predicted protein, partial [Hordeum vulgare subsp. vulgare]			GO:0033617//mitochondrial respiratory chain complex IV assembly;GO:0005758//mitochondrial intermembrane space;GO:0009060//aerobic respiration
CL16231.Contig11_All	K17964//leucine-rich PPR motif-containing protein, mitochondrial	XM_020301568.1 PREDICTED: Aegilops tauschii subsp. tauschii protein Rf1, mitochondrial-like (LOC109742482), mRNA	protein Rf1, mitochondrial-like [Aegilops tauschii subsp. tauschii]	PPR repeat family	Protein Rf1, mitochondrial OS=Oryza sativa subsp. indica GN=Rf1 PE=2 SV=1
CL10089.Contig6_All	K20828//zinc finger protein 143/76;K11446//histone demethylase JARID1 [EC:1.14.11.-]	XM_020309206.1 PREDICTED: Aegilops tauschii subsp. tauschii lysine-specific demethylase JMJ705-like (LOC109750246), mRNA	hypothetical protein BRADI_2g58130 [Brachypodium distachyon]	Zinc finger, C2H2 type	Lysine-specific demethylase JMJ705 OS=Oryza sativa subsp. japonica GN=JMJ705 PE=1 SV=1
Unigene18597_All	K15979//staphylococcal nuclease domain-containing protein 1	XM_003574021.3 PREDICTED: Brachypodium distachyon staphylococcal nuclease domain-containing protein 1 (LOC100843582), mRNA	PREDICTED: staphylococcal nuclease domain-containing protein 1 [Brachypodium distachyon] >KQJ97123.1 hypothetical protein BRADI_3g28930 [Brachypodium distachyon] >KQJ97124.1 hypothetical protein BRADI_3g28930 [Brachypodium distachyon]	Staphylococcal nuclease homologue	Ribonuclease TUDOR 1 OS=Arabidopsis thaliana GN=TSN1 PE=1 SV=1	GO:0006401//RNA catabolic process;GO:0005634//nucleus;GO:0031047//gene silencing by RNA;GO:0016442//RISC complex;GO:0005737//cytoplasm;GO:0004518//nuclease activity
CL5061.Contig1_All		XM_020329669.1 PREDICTED: Aegilops tauschii subsp. tauschii OBERON-like protein (LOC109770956), transcript variant X2, mRNA	OBERON-like protein [Aegilops tauschii subsp. tauschii] >XP_020185258.1 OBERON-like protein [Aegilops tauschii subsp. tauschii]	Coiled-coil region of Oberon	OBERON-like protein OS=Nicotiana benthamiana GN=PVIP PE=1 SV=1
CL7511.Contig8_All	K07305//peptide-methionine (R)-S-oxide reductase [EC:1.8.4.12]	XM_003563805.3 PREDICTED: Brachypodium distachyon peptide methionine sulfoxide reductase B1, chloroplastic (LOC100824054), mRNA	PREDICTED: peptide methionine sulfoxide reductase B1, chloroplastic [Brachypodium distachyon] >KQK18342.1 hypothetical protein BRADI_1g41830 [Brachypodium distachyon]	SelR domain	Peptide methionine sulfoxide reductase B1, chloroplastic OS=Oryza sativa subsp. japonica GN=MSRB1 PE=2 SV=2	GO:0006979//response to oxidative stress;GO:0033743//peptide-methionine (R)-S-oxide reductase activity;GO:0030091//protein repair;GO:0009570//chloroplast stroma
CL17084.Contig5_All	K01528//dynamin GTPase [EC:3.6.5.5]+ko04144//Endocytosis	XM_003574312.3 PREDICTED: Brachypodium distachyon dynamin-related protein 1E-like (LOC100830127), mRNA	PREDICTED: dynamin-related protein 1E-like [Musa acuminata subsp. malaccensis]	Dynamin central region	Dynamin-related protein 1E OS=Arabidopsis thaliana GN=DRP1E PE=1 SV=1	GO:0005525//GTP binding;GO:0003924//GTPase activity
Unigene1750_All	K08493//vesicle transport through interaction with t-SNAREs 1+ko04130//SNARE interactions in vesicular transport	XM_003569174.3 PREDICTED: Brachypodium distachyon vesicle transport v-SNARE 13 (LOC100837077), mRNA	PREDICTED: vesicle transport v-SNARE 13-like [Brachypodium distachyon] >KQK04261.1 hypothetical protein BRADI_2g12660 [Brachypodium distachyon]	Vesicle transport v-SNARE protein N-terminus	Vesicle transport v-SNARE 13 OS=Arabidopsis thaliana GN=VTI13 PE=2 SV=1	GO:0006896//Golgi to vacuole transport;GO:0000149//SNARE binding;GO:0005484//SNAP receptor activity;GO:0006891//intra-Golgi vesicle-mediated transport;GO:0016192//vesicle-mediated transport;GO:0048280//vesicle fusion with Golgi apparatus;GO:0006623//protein targeting to vacuole;GO:0005829//cytosol;GO:0016021//integral component of membrane;GO:0031902//late endosome membrane;GO:0042147//retrograde…
CL5225.Contig1_All	K05292//phosphatidylinositol glycan, class T+ko01100//Metabolic pathways+ko00563//Glycosylphosphatidylinositol (GPI)-anchor biosynthesis	FP098417.1 Phyllostachys edulis cDNA clone: bphyem127d15, full insert sequence	predicted protein [Hordeum vulgare subsp. vulgare]	AP2 domain	Ethylene-responsive transcription factor-like protein At4g13040 OS=Arabidopsis thaliana GN=At4g13040 PE=2 SV=2	GO:0003677//DNA binding;GO:0005634//nucleus;GO:0007275//multicellular organism development;GO:0006351//transcription, DNA-templated;GO:0003700//DNA binding transcription factor activity
CL12170.Contig3_All	K15262//protein BCP1	XM_003560124.3 PREDICTED: Brachypodium distachyon protein BCCIP homolog (LOC100844129), mRNA	PREDICTED: protein BCCIP homolog [Brachypodium distachyon] >KQK12019.1 hypothetical protein BRADI_1g01070 [Brachypodium distachyon]	p21-C-terminal region-binding protein	Protein BCCIP homolog OS=Arabidopsis thaliana GN=At2g44510 PE=1 SV=2
Unigene45752_All	K03457//nucleobase:cation symporter-1, NCS1 family	XM_020299680.1 PREDICTED: Aegilops tauschii subsp. tauschii purine-uracil permease NCS1-like (LOC109740626), mRNA	PREDICTED: purine-uracil permease NCS1 [Brachypodium distachyon]	Permease for cytosine/purines, uracil, thiamine, allantoin	Purine-uracil permease NCS1 OS=Arabidopsis thaliana GN=NCS1 PE=1 SV=1	GO:0015205//nucleobase transmembrane transporter activity;GO:0043100//pyrimidine nucleobase salvage;GO:0015851//nucleobase transport;GO:0009526//plastid envelope;GO:0016021//integral component of membrane;GO:0005886//plasma membrane
CL1431.Contig47_All		XM_003573572.3 PREDICTED: Brachypodium distachyon uncharacterized LOC100832164 (LOC100832164), mRNA	uncharacterized protein LOC109733070 [Aegilops tauschii subsp. tauschii]	Zinc-ribbon		GO:0004596//peptide alpha-N-acetyltransferase activity;GO:0006474//N-terminal protein amino acid acetylation;GO:0031248//protein acetyltransferase complex;GO:0009507//chloroplast
Unigene35385_All	K00574//cyclopropane-fatty-acyl-phospholipid synthase [EC:2.1.1.79]	XM_002437147.2 PREDICTED: Sorghum bicolor (S)-coclaurine N-methyltransferase (LOC8079308), mRNA	hypothetical protein SORBI_3010G174400 [Sorghum bicolor]	Mycolic acid cyclopropane synthetase	Pavine N-methyltransferase OS=Thalictrum flavum subsp. glaucum PE=1 SV=1	GO:0008168//methyltransferase activity;GO:0008610//lipid biosynthetic process
Unigene13403_All	K03768//peptidyl-prolyl cis-trans isomerase B (cyclophilin B) [EC:5.2.1.8]	XM_010239456.2 PREDICTED: Brachypodium distachyon plant UBX domain-containing protein 11 (LOC100834745), transcript variant X1, mRNA	PREDICTED: plant UBX domain-containing protein 11 isoform X1 [Brachypodium distachyon] >KQJ88655.1 hypothetical protein BRADI_4g20210 [Brachypodium distachyon]	UBX domain	Peptidyl-prolyl cis-trans isomerase, chloroplastic OS=Vicia faba PE=1 SV=1
CL6054.Contig16_All	K04730//interleukin-1 receptor-associated kinase 1 [EC:2.7.11.1];K04733//interleukin-1 receptor-associated kinase 4 [EC:2.7.11.1]	AP014957.1 Oryza sativa Japonica Group DNA, chromosome 1, cultivar: Nipponbare, complete sequence	PREDICTED: proline-rich receptor-like protein kinase PERK1 [Brachypodium distachyon] >KQK03391.1 hypothetical protein BRADI_2g07560 [Brachypodium distachyon]		Proline-rich receptor-like protein kinase PERK4 OS=Arabidopsis thaliana GN=PERK4 PE=1 SV=1	GO:0004674//protein serine/threonine kinase activity;GO:0005524//ATP binding;GO:0016021//integral component of membrane
Unigene14990_All	K04382//serine/threonine-protein phosphatase 2A catalytic subunit [EC:3.1.3.16]+ko04136//Autophagy - other+ko03015//mRNA surveillance pathway	XM_003564149.2 PREDICTED: Brachypodium distachyon serine/threonine-protein phosphatase PP2A-2 catalytic subunit (LOC100827255), mRNA	PREDICTED: serine/threonine-protein phosphatase PP2A-2 catalytic subunit [Oryza sativa Japonica Group] >XP_015631519.1 PREDICTED: serine/threonine-protein phosphatase PP2A-2 catalytic subunit [Oryza sativa Japonica Group] >Q10BT5.1 RecName: Full=Serine/threonine-protein phosphatase PP2A-2 catalytic subunit >A2XN40.2 RecName: Full=Serine/threonine-protein phosphatase PP2A-2 catalytic subunit >AAD2…	Calcineurin-like phosphoesterase	Serine/threonine-protein phosphatase PP2A-2 catalytic subunit OS=Oryza sativa subsp. japonica GN=PP2A2 PE=2 SV=1	GO:0046872//metal ion binding;GO:0004721//phosphoprotein phosphatase activity;GO:0005737//cytoplasm
CL9438.Contig1_All	K10695//E3 ubiquitin-protein ligase RNF1/2 [EC:2.3.2.27]		putative E3 ubiquitin-protein ligase RING1a [Dichanthelium oligosanthes]
CL11492.Contig1_All	K02184//formin 2	FP094635.1 Phyllostachys edulis cDNA clone: bphylf047i19, full insert sequence	PREDICTED: salt stress root protein RS1 [Oryza sativa Japonica Group] >Q0JPA6.1 RecName: Full=Salt stress root protein RS1 >A2WMG6.1 RecName: Full=Salt stress root protein RS1 >BAA96588.1 plasma membrane polypeptide -like [Oryza sativa Japonica Group] >BAF04422.1 Os01g0233000 [Oryza sativa Japonica Group] >EAY73162.1 hypothetical protein OsI_01035 [Oryza sativa Indica Group] >EAZ11155.1 hypotheti…	DREPP plasma membrane polypeptide	Salt stress root protein RS1 OS=Oryza sativa subsp. japonica GN=Os01g0233000 PE=2 SV=1	GO:0051716//cellular response to stimulus;GO:0046658//anchored component of plasma membrane
CL17028.Contig9_All		XM_003575032.3 PREDICTED: Brachypodium distachyon mitochondrial fission protein ELM1 (LOC100822354), mRNA	PREDICTED: mitochondrial fission protein ELM1 [Brachypodium distachyon] >KQJ99749.1 hypothetical protein BRADI_3g45040 [Brachypodium distachyon]	Mitochondrial fission ELM1	Mitochondrial fission protein ELM1 OS=Arabidopsis thaliana GN=ELM1 PE=1 SV=1
CL10881.Contig2_All	K02946//small subunit ribosomal protein S10+ko03010//Ribosome	XM_003581388.3 PREDICTED: Brachypodium distachyon 40S ribosomal protein S10, mitochondrial (LOC100824046), mRNA	uncharacterized protein LOC109773351 [Aegilops tauschii subsp. tauschii]	Ribosomal protein S10p/S20e	Ribosomal protein S10, mitochondrial OS=Pisum sativum GN=RPS10 PE=2 SV=1	GO:0005840//ribosome;GO:0006412//translation;GO:0003735//structural constituent of ribosome
CL16594.Contig3_All	K02838//ribosome recycling factor	FP097055.1 Phyllostachys edulis cDNA clone: bphylf003g16, full insert sequence	hypothetical protein BRADI_5g14160 [Brachypodium distachyon]	Ribosome recycling factor	Ribosome-recycling factor, chloroplastic OS=Spinacia oleracea GN=RRF PE=1 SV=1	GO:0006412//translation;GO:0043023//ribosomal large subunit binding;GO:0005739//mitochondrion
CL3739.Contig5_All	K03129//transcription initiation factor TFIID subunit 4+ko03022//Basal transcription factors	XM_010237482.2 PREDICTED: Brachypodium distachyon transcription initiation factor TFIID subunit 4b-like (LOC100843773), mRNA	PREDICTED: transcription initiation factor TFIID subunit 4b-like [Brachypodium distachyon] >KQK00582.1 hypothetical protein BRADI_3g50457 [Brachypodium distachyon]	Transcription initiation factor TFIID component TAF4 family	Transcription initiation factor TFIID subunit 4b OS=Arabidopsis thaliana GN=TAF4B PE=1 SV=1	GO:0003677//DNA binding;GO:0003713//transcription coactivator activity;GO:0045944//positive regulation of transcription from RNA polymerase II promoter;GO:0008134//transcription factor binding;GO:0005669//transcription factor TFIID complex;GO:0051123//RNA polymerase II transcriptional preinitiation complex assembly
CL1408.Contig5_All	K10269//F-box and leucine-rich repeat protein 3;K10268//F-box and leucine-rich repeat protein 2/20;K18754//protein lin-28	FP092960.1 Phyllostachys edulis cDNA clone: bphylf034m04, full insert sequence	F-box/LRR-repeat protein At3g48880 isoform X1 [Aegilops tauschii subsp. tauschii]	F-box-like	F-box/LRR-repeat protein At3g48880 OS=Arabidopsis thaliana GN=At3g48880 PE=2 SV=1	GO:0016021//integral component of membrane
Unigene11697_All	K04733//interleukin-1 receptor-associated kinase 4 [EC:2.7.11.1]	XM_020325356.1 PREDICTED: Aegilops tauschii subsp. tauschii probable serine/threonine-protein kinase PIX7 (LOC109766573), mRNA	probable serine/threonine-protein kinase PIX7 [Aegilops tauschii subsp. tauschii]	Protein tyrosine kinase	Probable serine/threonine-protein kinase PIX7 OS=Arabidopsis thaliana GN=PIX7 PE=1 SV=1
Unigene65468_All		XM_003574473.3 PREDICTED: Brachypodium distachyon GDT1-like protein 5 (LOC100828112), transcript variant X1, mRNA	PREDICTED: GDT1-like protein 5 isoform X1 [Brachypodium distachyon] >KQJ98393.1 hypothetical protein BRADI_3g36630 [Brachypodium distachyon]	Uncharacterized protein family UPF0016	GDT1-like protein 5 OS=Oryza sativa subsp. japonica GN=Os08g0433100 PE=2 SV=1	GO:0016021//integral component of membrane
CL10484.Contig5_All	K03257//translation initiation factor 4A+ko03013//RNA transport	XM_003563460.3 PREDICTED: Brachypodium distachyon eukaryotic initiation factor 4A (LOC100844546), transcript variant X1, mRNA	PREDICTED: eukaryotic initiation factor 4A-3 [Oryza brachyantha] >XP_006646879.1 PREDICTED: eukaryotic initiation factor 4A-3 [Oryza brachyantha]	DEAD/DEAH box helicase	Eukaryotic initiation factor 4A OS=Triticum aestivum PE=2 SV=1	GO:0010468//regulation of gene expression;GO:0005634//nucleus;GO:0005524//ATP binding;GO:0004386//helicase activity;GO:0005737//cytoplasm;GO:0003676//nucleic acid binding;GO:0006413//translational initiation;GO:0003743//translation initiation factor activity;GO:0005730//nucleolus;GO:0004004//ATP-dependent RNA helicase activity;GO:0010501//RNA secondary structure unwinding
CL1256.Contig5_All	K06630//14-3-3 protein epsilon	XM_020300998.1 PREDICTED: Aegilops tauschii subsp. tauschii 14-3-3-like protein A (LOC109741910), mRNA	14-3-3-like protein A [Aegilops tauschii subsp. tauschii] >CAA44259.1 14-3-3 protein homologue [Hordeum vulgare subsp. vulgare] >BAJ85422.1 predicted protein [Hordeum vulgare subsp. vulgare] >AGA84103.1 14-3-3 protein [Triticum aestivum]	14-3-3 protein	14-3-3-like protein A OS=Hordeum vulgare PE=2 SV=1	GO:0008426//protein kinase C inhibitor activity;GO:0019904//protein domain specific binding
Unigene58446_All	K15377//solute carrier family 44 (choline transporter-like protein), member 2/4/5;K20547//basic endochitinase B [EC:3.2.1.14]+ko04016//MAPK signaling pathway - plant+ko00520//Amino sugar and nucleotide sugar metabolism+ko01100//Metabolic pathways	XM_003572605.3 PREDICTED: Brachypodium distachyon CTL-like protein DDB_G0274487 (LOC100841552), mRNA	PREDICTED: CTL-like protein DDB_G0274487 [Brachypodium distachyon] >KQK00040.1 hypothetical protein BRADI_3g46940 [Brachypodium distachyon]	Plasma-membrane choline transporter	Sulfated surface glycoprotein 185 OS=Volvox carteri PE=1 SV=1	GO:0016021//integral component of membrane
Unigene49663_All	K14611//solute carrier family 23 (nucleobase transporter), member 1/2	XM_003574361.3 PREDICTED: Brachypodium distachyon nucleobase-ascorbate transporter 2-like (LOC100845314), transcript variant X1, mRNA	hypothetical protein PAHAL_F02975 [Panicum hallii] >PAN34780.1 hypothetical protein PAHAL_F02975 [Panicum hallii] >PAN34781.1 hypothetical protein PAHAL_F02975 [Panicum hallii]	Permease family	Nucleobase-ascorbate transporter 2 OS=Arabidopsis thaliana GN=NAT2 PE=2 SV=2
CL1861.Contig1_All	K13832//3-dehydroquinate dehydratase / shikimate dehydrogenase [EC:4.2.1.10 1.1.1.25]+ko01230//Biosynthesis of amino acids+ko01100//Metabolic pathways+ko01110//Biosynthesis of secondary metabolites+ko00400//Phenylalanine, tyrosine and tryptophan biosynthesis	XM_003569315.3 PREDICTED: Brachypodium distachyon zinc finger CCCH domain-containing protein 8 (LOC100828596), transcript variant X1, mRNA	PREDICTED: zinc finger CCCH domain-containing protein 8 isoform X1 [Brachypodium distachyon] >KQK08731.1 hypothetical protein BRADI_2g43600 [Brachypodium distachyon]	Zinc finger C-x8-C-x5-C-x3-H type (and similar)	Zinc finger CCCH domain-containing protein 8 OS=Oryza sativa subsp. japonica GN=Os01g0616400 PE=2 SV=2	GO:0046872//metal ion binding
CL4571.Contig7_All	K22377//E3 ubiquitin-protein ligase listerin [EC:2.3.2.27];K03539//ribonuclease P/MRP protein subunit RPP1 [EC:3.1.26.5]+ko03013//RNA transport+ko03008//Ribosome biogenesis in eukaryotes	FP095737.1 Phyllostachys edulis cDNA clone: bphyem202e08, full insert sequence	PREDICTED: uncharacterized protein LOC4339814 [Oryza sativa Japonica Group] >BAF18428.1 Os05g0595300 [Oryza sativa Japonica Group] >BAS95668.1 Os05g0595300 [Oryza sativa Japonica Group]	CCT motif	Transcription factor GHD7 OS=Oryza sativa subsp. japonica GN=GHD7 PE=1 SV=1	GO:0005634//nucleus
Unigene57227_All	K12872//pre-mRNA-splicing factor RBM22/SLT11+ko03040//Spliceosome	FP095017.1 Phyllostachys edulis cDNA clone: bphylf030b16, full insert sequence	PREDICTED: zinc finger CCCH domain-containing protein 40 [Brachypodium distachyon] >KQK19411.1 hypothetical protein BRADI_1g48140 [Brachypodium distachyon]	RNA recognition motif. (a.k.a. RRM, RBD, or RNP domain)	Zinc finger CCCH domain-containing protein 40 OS=Oryza sativa subsp. japonica GN=Os06g0170500 PE=2 SV=1	GO:0071007//U2-type catalytic step 2 spliceosome;GO:0003723//RNA binding;GO:0003677//DNA binding;GO:0071006//U2-type catalytic step 1 spliceosome;GO:0000974//Prp19 complex;GO:0017070//U6 snRNA binding;GO:0046872//metal ion binding;GO:0036002//pre-mRNA binding;GO:0000387//spliceosomal snRNP assembly
CL17227.Contig28_All	K13414//mitogen-activated protein kinase kinase kinase 1 [EC:2.7.11.25]+ko04016//MAPK signaling pathway - plant+ko04626//Plant-pathogen interaction	XM_010231198.2 PREDICTED: Brachypodium distachyon uncharacterized LOC100826299 (LOC100826299), mRNA	hypothetical protein BRADI_1g10970 [Brachypodium distachyon]	Protein kinase domain	Probable WRKY transcription factor 19 OS=Arabidopsis thaliana GN=WRKY19 PE=3 SV=1
CL10491.Contig1_All	K17616//CTD small phosphatase-like protein 2 [EC:3.1.3.-]	XM_006658037.2 PREDICTED: Oryza brachyantha stress-related protein (LOC102705360), mRNA	PREDICTED: stress-related protein [Oryza brachyantha]	Rubber elongation factor protein (REF)	Stress-related protein OS=Vitis riparia GN=SRP PE=2 SV=1	GO:0019915//lipid storage;GO:0080186//developmental vegetative growth;GO:0005811//lipid droplet;GO:1902584//positive regulation of response to water deprivation;GO:0034389//lipid particle organization;GO:0045927//positive regulation of growth;GO:0005773//vacuole
CL12550.Contig2_All	K20624//12-hydroxyjasmonoyl-L-amino acid 12-hydroxylase / fatty acid hydroxylase [EC:1.14.14.49]	FP097223.1 Phyllostachys edulis cDNA clone: bphyem202g14, full insert sequence	hypothetical protein OsI_04502 [Oryza sativa Indica Group]	Cytochrome P450	Cytochrome P450 94C1 OS=Arabidopsis thaliana GN=CYP94C1 PE=2 SV=1	GO:0016705//oxidoreductase activity, acting on paired donors, with incorporation or reduction of molecular oxygen;GO:0020037//heme binding;GO:0005506//iron ion binding;GO:0016021//integral component of membrane
CL6072.Contig26_All	K15436//transportin-3	AK334527.1 Triticum aestivum cDNA, clone: WT010_D01, cultivar: Chinese Spring	PREDICTED: uncharacterized protein LOC100825040 [Brachypodium distachyon] >KQJ88302.1 hypothetical protein BRADI_4g16893 [Brachypodium distachyon]	Sarcosine oxidase, delta subunit family		GO:0043484//regulation of RNA splicing;GO:0005634//nucleus;GO:0006606//protein import into nucleus
CL343.Contig2_All	K13172//serine/arginine repetitive matrix protein 2	XM_003568402.3 PREDICTED: Brachypodium distachyon probable mediator of RNA polymerase II transcription subunit 26a (LOC100834194), mRNA	predicted protein [Hordeum vulgare subsp. vulgare] >BAJ91623.1 predicted protein [Hordeum vulgare subsp. vulgare] >BAJ92587.1 predicted protein [Hordeum vulgare subsp. vulgare]	TFIIS helical bundle-like domain	Protein Ycf2 OS=Oenothera biennis GN=ycf2-A PE=3 SV=1	GO:0006368//transcription elongation from RNA polymerase II promoter;GO:0070449//elongin complex
Unigene65686_All
CL5127.Contig3_All	K02879//large subunit ribosomal protein L17+ko03010//Ribosome	XM_003563785.3 PREDICTED: Brachypodium distachyon 50S ribosomal protein L17 (LOC100843749), mRNA	predicted protein [Hordeum vulgare subsp. vulgare] >BAK02987.1 predicted protein [Hordeum vulgare subsp. vulgare] >BAK01129.1 predicted protein [Hordeum vulgare subsp. vulgare]	Ribosomal protein L17	50S ribosomal protein L17, chloroplastic OS=Spinacia oleracea GN=RPL17 PE=1 SV=2	GO:0005840//ribosome;GO:0006412//translation;GO:0022625//cytosolic large ribosomal subunit;GO:0003735//structural constituent of ribosome;GO:0009941//chloroplast envelope;GO:0009570//chloroplast stroma
Unigene15056_All	K02218//casein kinase 1 [EC:2.7.11.1];K15296//alpha-soluble NSF attachment protein	FP101749.1 Phyllostachys edulis cDNA clone: bphyst003l15, full insert sequence	casein kinase 1-like protein HD16 [Aegilops tauschii subsp. tauschii]	Soluble NSF attachment protein, SNAP	Casein kinase 1-like protein HD16 OS=Oryza sativa subsp. japonica GN=HD16 PE=1 SV=1
CL7798.Contig10_All		XM_014901944.1 PREDICTED: Brachypodium distachyon trigger factor-like (LOC100832086), transcript variant X2, mRNA	PREDICTED: trigger factor-like isoform X2 [Brachypodium distachyon]	Bacterial trigger factor protein (TF)		GO:0006457//protein folding;GO:0015031//protein transport;GO:0009570//chloroplast stroma
CL5167.Contig6_All	K04733//interleukin-1 receptor-associated kinase 4 [EC:2.7.11.1]	XM_020325339.1 PREDICTED: Aegilops tauschii subsp. tauschii U-box domain-containing protein 33-like (LOC109766556), mRNA	U-box domain-containing protein 33-like [Aegilops tauschii subsp. tauschii]	ESCRT-I subunit Mvb12	U-box domain-containing protein 32 OS=Arabidopsis thaliana GN=PUB32 PE=2 SV=1	GO:0004842//ubiquitin-protein transferase activity
CL9442.Contig1_All	K03012//DNA-directed RNA polymerase II subunit RPB4+ko00230//Purine metabolism+ko03020//RNA polymerase+ko01100//Metabolic pathways+ko00240//Pyrimidine metabolism	FP094303.1 Phyllostachys edulis cDNA clone: bphylf028i14, full insert sequence	PREDICTED: DNA-directed RNA polymerase II subunit 4 [Oryza brachyantha]	RNA polymerase Rpb4	DNA-directed RNA polymerase II subunit 4 OS=Arabidopsis thaliana GN=NRPB4 PE=1 SV=1	GO:0003899//DNA-directed 5'-3' RNA polymerase activity;GO:0000166//nucleotide binding;GO:0006351//transcription, DNA-templated
Unigene65449_All	K00430//peroxidase [EC:1.11.1.7]+ko01100//Metabolic pathways+ko01110//Biosynthesis of secondary metabolites+ko00940//Phenylpropanoid biosynthesis	AK335106.1 Triticum aestivum cDNA, clone: WT012_B09, cultivar: Chinese Spring	peroxidase 5-like [Aegilops tauschii subsp. tauschii]	Peroxidase	Peroxidase 5 OS=Vitis vinifera GN=GSVIVT00037159001 PE=1 SV=2	GO:0020037//heme binding;GO:0009506//plasmodesma;GO:0006979//response to oxidative stress;GO:0009505//plant-type cell wall;GO:0046872//metal ion binding;GO:0009664//plant-type cell wall organization;GO:0004601//peroxidase activity;GO:0005576//extracellular region;GO:0042744//hydrogen peroxide catabolic process
CL675.Contig7_All	K10752//histone-binding protein RBBP4	XM_003569616.3 PREDICTED: Brachypodium distachyon WD-40 repeat-containing protein MSI4 (LOC100843662), mRNA	WD-40 repeat-containing protein MSI4 isoform X1 [Aegilops tauschii subsp. tauschii]	WD domain, G-beta repeat	WD-40 repeat-containing protein MSI4 OS=Arabidopsis thaliana GN=MSI4 PE=1 SV=3	GO:0005634//nucleus
CL4170.Contig5_All	K02184//formin 2;K22020//mucin-19	XM_014902874.1 PREDICTED: Brachypodium distachyon F-box/kelch-repeat protein At5g42350-like (LOC100832276), mRNA	PREDICTED: F-box/kelch-repeat protein At5g42350-like [Brachypodium distachyon] >KQJ91405.1 hypothetical protein BRADI_4g37490 [Brachypodium distachyon]	Kelch motif	Formin-like protein 5 OS=Oryza sativa subsp. japonica GN=FH5 PE=2 SV=2	GO:0016567//protein ubiquitination;GO:0031463//Cul3-RING ubiquitin ligase complex
Unigene22792_All		XM_003564610.2 PREDICTED: Brachypodium distachyon uncharacterized LOC100838671 (LOC100838671), mRNA	hypothetical protein BRADI_2g55520 [Brachypodium distachyon]
CL5608.Contig1_All	K12827//splicing factor 3A subunit 3+ko03040//Spliceosome	XM_003570532.3 PREDICTED: Brachypodium distachyon splicing factor 3A subunit 3 (LOC100837688), mRNA	PREDICTED: splicing factor 3A subunit 3 [Brachypodium distachyon] >KQK01780.1 hypothetical protein BRADI_3g58172 [Brachypodium distachyon]	Domain of unknown function (DUF3449)	Splicing factor SF3a60 homolog OS=Arabidopsis thaliana GN=ATO PE=1 SV=1	GO:0003723//RNA binding;GO:0000398//mRNA splicing, via spliceosome;GO:0005681//spliceosomal complex;GO:0008270//zinc ion binding
Unigene64126_All		XM_003568982.2 PREDICTED: Brachypodium distachyon uncharacterized LOC100828595 (LOC100828595), mRNA	PREDICTED: uncharacterized protein LOC100828595 [Brachypodium distachyon] >KQK07813.1 hypothetical protein BRADI_2g37770 [Brachypodium distachyon]	Protein of unknown function (DUF1218)	Thylakoid membrane protein TERC, chloroplastic OS=Arabidopsis thaliana GN=TERC PE=1 SV=1	GO:0016021//integral component of membrane;GO:0005886//plasma membrane
CL4523.Contig3_All	K15078//structure-specific endonuclease subunit SLX1 [EC:3.6.1.-]	CP018167.1 Oryza sativa Indica Group cultivar Shuhui498 chromosome 11 sequence	PREDICTED: putative disease resistance protein RGA4 [Oryza sativa Japonica Group] >ABA94978.1 Leucine Rich Repeat family protein, expressed [Oryza sativa Japonica Group] >ABA94979.1 Leucine Rich Repeat family protein, expressed [Oryza sativa Japonica Group] >BAF28710.1 Os11g0640300 [Oryza sativa Japonica Group] >EAZ19034.1 hypothetical protein OsJ_34565 [Oryza sativa Japonica Group] >BAT15002.1 O…	NB-ARC domain	Putative disease resistance protein At3g14460 OS=Arabidopsis thaliana GN=At3g14460 PE=3 SV=1	GO:0043531//ADP binding;GO:0007165//signal transduction;GO:0006952//defense response;GO:0005886//plasma membrane
Unigene50522_All	K03942//NADH dehydrogenase (ubiquinone) flavoprotein 1 [EC:1.6.5.3 1.6.99.3]+ko01100//Metabolic pathways+ko00190//Oxidative phosphorylation		putative polyprotein [Oryza sativa Japonica Group] >AAP54986.1 retrotransposon protein, putative, unclassified [Oryza sativa Japonica Group]	Retrotransposon gag protein
CL5121.Contig4_All	K12842//U2-associated protein SR140+ko03040//Spliceosome	XM_010236638.2 PREDICTED: Brachypodium distachyon U2 snRNP-associated SURP motif-containing protein-like (LOC100845412), transcript variant X3, mRNA	PREDICTED: U2 snRNP-associated SURP motif-containing protein-like isoform X1 [Brachypodium distachyon] >XP_010234939.1 PREDICTED: U2 snRNP-associated SURP motif-containing protein-like isoform X1 [Brachypodium distachyon] >KQJ97564.1 hypothetical protein BRADI_3g31900 [Brachypodium distachyon]	Surp module	Protein RRC1 OS=Arabidopsis thaliana GN=RRC1 PE=1 SV=1	GO:0006396//RNA processing;GO:0003723//RNA binding
CL14617.Contig2_All	K08909//light-harvesting complex I chlorophyll a/b binding protein 3+ko00196//Photosynthesis - antenna proteins	AK360952.1 Hordeum vulgare subsp. vulgare mRNA for predicted protein, complete cds, clone: NIASHv1129D11	chlorophyll a-b binding protein 8, chloroplastic [Aegilops tauschii subsp. tauschii] >EMS56059.1 Chlorophyll a-b binding protein 8, chloroplastic [Triticum urartu]	Chlorophyll A-B binding protein	Chlorophyll a-b binding protein 8, chloroplastic OS=Solanum lycopersicum GN=CAB8 PE=3 SV=1	GO:0009768//photosynthesis, light harvesting in photosystem I;GO:0010287//plastoglobule;GO:0009535//chloroplast thylakoid membrane;GO:0009523//photosystem II;GO:0009416//response to light stimulus;GO:0018298//protein-chromophore linkage;GO:0031409//pigment binding;GO:0016021//integral component of membrane;GO:0009941//chloroplast envelope;GO:0016168//chlorophyll binding;GO:0009522//photosystem I
CL5377.Contig1_All	K10443//kelch-like protein 2/3;K14308//nuclear pore complex protein Nup54+ko03013//RNA transport	XM_003557606.3 PREDICTED: Brachypodium distachyon F-box/kelch-repeat protein At1g30090 (LOC100836187), mRNA	hypothetical protein OsI_24933 [Oryza sativa Indica Group] >EAZ38729.1 hypothetical protein OsJ_23130 [Oryza sativa Japonica Group]	Kelch motif	F-box/kelch-repeat protein At1g30090 OS=Arabidopsis thaliana GN=At1g30090 PE=2 SV=1
CL279.Contig3_All	K19765//heat shock factor-binding protein 1	AK374935.1 Hordeum vulgare subsp. vulgare mRNA for predicted protein, complete cds, clone: NIASHv3080M09	predicted protein [Hordeum vulgare subsp. vulgare]	Integrase
CL12100.Contig3_All	K01673//carbonic anhydrase [EC:4.2.1.1]+ko00910//Nitrogen metabolism	XM_010233770.2 PREDICTED: Brachypodium distachyon carbonic anhydrase, chloroplastic-like (LOC104582824), mRNA	PREDICTED: carbonic anhydrase, chloroplastic-like [Brachypodium distachyon] >KQK08921.1 hypothetical protein BRADI_2g44870 [Brachypodium distachyon]	Carbonic anhydrase	Carbonic anhydrase, chloroplastic OS=Hordeum vulgare PE=2 SV=1	GO:0015976//carbon utilization;GO:0008270//zinc ion binding;GO:0004089//carbonate dehydratase activity
CL11692.Contig3_All	K14651//transcription initiation factor TFIID subunit 15+ko03022//Basal transcription factors;K14525//ribonucleases P/MRP protein subunit RPP25 [EC:3.1.26.5]+ko03013//RNA transport+ko03008//Ribosome biogenesis in eukaryotes	XM_010230838.2 PREDICTED: Brachypodium distachyon glycine-rich cell wall structural protein 1.8-like (LOC100830556), mRNA	hypothetical protein OsI_10156 [Oryza sativa Indica Group]	Alba	Protein argonaute 2 OS=Oryza sativa subsp. japonica GN=AGO2 PE=2 SV=2	GO:0003676//nucleic acid binding
CL5162.Contig2_All	K14503//brassinosteroid resistant 1/2+ko04075//Plant hormone signal transduction	CP018162.1 Oryza sativa Indica Group cultivar Shuhui498 chromosome 6 sequence	PREDICTED: protein BZR1 homolog 4 isoform X1 [Oryza sativa Japonica Group] >Q6EUF1.2 RecName: Full=Protein BZR1 homolog 4; Short=OsBZR4; AltName: Full=Protein BRASSINAZOLE-RESISTANT 1 homolog 4 >BAS77796.1 Os02g0233200 [Oryza sativa Japonica Group]		Protein BZR1 homolog 4 OS=Oryza sativa subsp. japonica GN=BZR4 PE=3 SV=2	GO:0003677//DNA binding;GO:0040008//regulation of growth;GO:0006351//transcription, DNA-templated;GO:0009742//brassinosteroid mediated signaling pathway;GO:0003700//DNA binding transcription factor activity
CL16615.Contig7_All	K14288//exportin-T+ko03013//RNA transport;K00430//peroxidase [EC:1.11.1.7]+ko01100//Metabolic pathways+ko01110//Biosynthesis of secondary metabolites+ko00940//Phenylpropanoid biosynthesis;K10268//F-box and leucine-rich repeat protein 2/20;K13429//chitin elicitor receptor kinase 1+ko04626//Plant-pathogen interaction;K06228//fused [EC:2.7.11.1]	HG670306.1 Triticum aestivum chromosome 3B, genomic scaffold, cultivar Chinese Spring	retrotransposon protein, putative, Ty1-copia subclass [Oryza sativa Japonica Group]		Retrovirus-related Pol polyprotein from transposon TNT 1-94 OS=Nicotiana tabacum PE=2 SV=1
CL14147.Contig1_All	K19042//E3 ubiquitin-protein ligase BOI and related proteins [EC:2.3.2.27]	CU406370.1 Oryza rufipogon (W1943) cDNA clone: ORW1943C109D12, full insert sequence >CU406587.1 Oryza rufipogon (W1943) cDNA clone: ORW1943C107A04, full insert sequence	hypothetical protein BRADI_3g52030 [Brachypodium distachyon]	Zinc finger, C3HC4 type (RING finger)	BOI-related E3 ubiquitin-protein ligase 1 OS=Arabidopsis thaliana GN=BRG1 PE=1 SV=1
Unigene24776_All	K09480//digalactosyldiacylglycerol synthase [EC:2.4.1.241]+ko01100//Metabolic pathways+ko00561//Glycerolipid metabolism	AK370363.1 Hordeum vulgare subsp. vulgare mRNA for predicted protein, complete cds, clone: NIASHv2109G06	PREDICTED: digalactosyldiacylglycerol synthase 1, chloroplastic-like [Brachypodium distachyon] >KQJ89346.1 hypothetical protein BRADI_4g25010 [Brachypodium distachyon]	Glycosyl transferases group 1	Digalactosyldiacylglycerol synthase 1, chloroplastic OS=Lotus japonicus GN=DGD1 PE=2 SV=1	GO:0019375//galactolipid biosynthetic process;GO:0035250//UDP-galactosyltransferase activity;GO:0009707//chloroplast outer membrane
CL4249.Contig2_All		XR_001407033.1 PREDICTED: Brachypodium distachyon uncharacterized LOC100830022 (LOC100830022), transcript variant X2, misc_RNA	PREDICTED: uncharacterized protein LOC100830022 [Brachypodium distachyon] >KQJ94475.1 hypothetical protein BRADI_3g10750 [Brachypodium distachyon]	Predicted membrane protein (DUF2232)		GO:0016021//integral component of membrane
CL2756.Contig8_All	K08057//calreticulin+ko04145//Phagosome+ko04141//Protein processing in endoplasmic reticulum	FP098600.1 Phyllostachys edulis cDNA clone: bphyem205l17, full insert sequence	calcium-binding protein [Zea mays] >CAA61939.1 Calreticulin precursor [Zea mays] >ACG33126.1 calreticulin precursor [Zea mays] >prf||2205314A calreticulin	Calreticulin family	Calreticulin OS=Oryza sativa subsp. japonica GN=Os07g0246200 PE=1 SV=2	GO:0006457//protein folding;GO:0005783//endoplasmic reticulum;GO:0051082//unfolded protein binding;GO:0005509//calcium ion binding
CL9113.Contig7_All	K13171//serine/arginine repetitive matrix protein 1+ko03015//mRNA surveillance pathway+ko03013//RNA transport;K22020//mucin-19	XM_020300728.1 PREDICTED: Aegilops tauschii subsp. tauschii uncharacterized LOC109741654 (LOC109741654), transcript variant X1, mRNA	uncharacterized protein LOC109741654 isoform X2 [Aegilops tauschii subsp. tauschii]	Cholesterol-capturing domain		GO:0016021//integral component of membrane
CL8611.Contig11_All	K18835//WRKY transcription factor 2+ko04626//Plant-pathogen interaction;K14325//RNA-binding protein with serine-rich domain 1+ko03015//mRNA surveillance pathway+ko03013//RNA transport	CP018161.1 Oryza sativa Indica Group cultivar Shuhui498 chromosome 5 sequence	probable WRKY transcription factor 50 [Sorghum bicolor] >EES18577.1 hypothetical protein SORBI_3009G212800 [Sorghum bicolor]		Probable WRKY transcription factor 51 OS=Arabidopsis thaliana GN=WRKY51 PE=1 SV=1	GO:0005634//nucleus;GO:0043565//sequence-specific DNA binding;GO:0006351//transcription, DNA-templated;GO:0003700//DNA binding transcription factor activity
Unigene2840_All	K16075//magnesium transporter	XM_003559801.3 PREDICTED: Brachypodium distachyon magnesium transporter MRS2-I (LOC100824855), transcript variant X1, mRNA	RecName: Full=Magnesium transporter MRS2-I >EEC76157.1 hypothetical protein OsI_13458 [Oryza sativa Indica Group]		Magnesium transporter MRS2-I OS=Oryza sativa subsp. japonica GN=MRS2-I PE=2 SV=1	GO:0016021//integral component of membrane;GO:0015095//magnesium ion transmembrane transporter activity
CL16702.Contig2_All	K08065//nuclear transcription Y subunit beta	FP093410.1 Phyllostachys edulis cDNA clone: bphyst026n20, full insert sequence	nuclear transcription factor Y subunit B-3-like isoform X2 [Aegilops tauschii subsp. tauschii]	Histone-like transcription factor (CBF/NF-Y) and archaeal histone	Nuclear transcription factor Y subunit B-3 OS=Oryza sativa subsp. japonica GN=NFYB3 PE=1 SV=2	GO:0005634//nucleus;GO:0006355//regulation of transcription, DNA-templated;GO:0043565//sequence-specific DNA binding;GO:0046982//protein heterodimerization activity
CL5198.Contig22_All	K20884//riboflavin kinase / FMN hydrolase [EC:2.7.1.26 3.1.3.102]+ko00740//Riboflavin metabolism+ko01100//Metabolic pathways+ko01110//Biosynthesis of secondary metabolites	FP097283.1 Phyllostachys edulis cDNA clone: bphyem118h15, full insert sequence	predicted protein [Hordeum vulgare subsp. vulgare]	Haloacid dehalogenase-like hydrolase	CBBY-like protein OS=Arabidopsis thaliana GN=CBBY PE=1 SV=1
CL12748.Contig102_All	K01011//thiosulfate/3-mercaptopyruvate sulfurtransferase [EC:2.8.1.1 2.8.1.2]+ko00920//Sulfur metabolism+ko04122//Sulfur relay system+ko01100//Metabolic pathways+ko00270//Cysteine and methionine metabolism	XM_010238750.2 PREDICTED: Brachypodium distachyon thiosulfate/3-mercaptopyruvate sulfurtransferase 2-like (LOC100832079), transcript variant X2, mRNA	hypothetical protein BRADI_4g02267 [Brachypodium distachyon]	Rhodanese-like domain	Thiosulfate/3-mercaptopyruvate sulfurtransferase 1, mitochondrial OS=Arabidopsis thaliana GN=STR1 PE=1 SV=1	GO:0004792//thiosulfate sulfurtransferase activity
CL16445.Contig19_All		XM_010236527.2 PREDICTED: Brachypodium distachyon protein ENHANCED DISEASE RESISTANCE 2-like (LOC100829914), transcript variant X2, mRNA	hypothetical protein OsJ_31910 [Oryza sativa Japonica Group]			GO:0008289//lipid binding
CL8681.Contig3_All	K21843//tetratricopeptide repeat protein 7;K05350//beta-glucosidase [EC:3.2.1.21]+ko01100//Metabolic pathways+ko00500//Starch and sucrose metabolism+ko01110//Biosynthesis of secondary metabolites+ko00460//Cyanoamino acid metabolism+ko00940//Phenylpropanoid biosynthesis	XM_002462892.2 PREDICTED: Sorghum bicolor microtubule-associated protein TORTIFOLIA1 (LOC8084051), transcript variant X1, mRNA	TORTIFOLIA1-like protein 1 isoform X2 [Aegilops tauschii subsp. tauschii]	HEAT repeats	Microtubule-associated protein TORTIFOLIA1 OS=Arabidopsis thaliana GN=TOR1 PE=1 SV=2
CL5618.Contig2_All	K01953//asparagine synthase (glutamine-hydrolysing) [EC:6.3.5.4]+ko00250//Alanine, aspartate and glutamate metabolism+ko01100//Metabolic pathways+ko01110//Biosynthesis of secondary metabolites	AK353762.1 Hordeum vulgare subsp. vulgare mRNA for predicted protein, complete cds, clone: NIASHv1002J05	predicted protein [Hordeum vulgare subsp. vulgare] >BAJ95102.1 predicted protein [Hordeum vulgare subsp. vulgare]	Asparagine synthase	Asparagine synthetase [glutamine-hydrolyzing] 2 OS=Oryza sativa subsp. japonica GN=Os06g0265000 PE=2 SV=3	GO:0006541//glutamine metabolic process;GO:0005524//ATP binding;GO:0009646//response to absence of light;GO:0006529//asparagine biosynthetic process;GO:0042803//protein homodimerization activity;GO:0004066//asparagine synthase (glutamine-hydrolyzing) activity
CL1988.Contig57_All	K14165//atypical dual specificity phosphatase [EC:3.1.3.16 3.1.3.48]	XM_003558961.3 PREDICTED: Brachypodium distachyon phosphoglucan phosphatase DSP4, amyloplastic (LOC100835154), transcript variant X1, mRNA	starch excess 4 [Hordeum vulgare subsp. vulgare]	Glycogen synthesis protein	Phosphoglucan phosphatase DSP4, amyloplastic OS=Castanea sativa GN=DSP4 PE=1 SV=1	GO:0007623//circadian rhythm;GO:0005982//starch metabolic process;GO:0019203//carbohydrate phosphatase activity;GO:0030247//polysaccharide binding;GO:2001066//amylopectin binding;GO:0008138//protein tyrosine/serine/threonine phosphatase activity;GO:0005983//starch catabolic process;GO:0009570//chloroplast stroma
CL1945.Contig2_All	K03255//protein TIF31;K00430//peroxidase [EC:1.11.1.7]+ko01100//Metabolic pathways+ko01110//Biosynthesis of secondary metabolites+ko00940//Phenylpropanoid biosynthesis	XM_003558187.3 PREDICTED: Brachypodium distachyon telomere repeat-binding protein 5-like (LOC100830660), mRNA	Telomere repeat-binding protein 5 [Triticum urartu]	Myb-like DNA-binding domain	Telomere repeat-binding protein 2 OS=Arabidopsis thaliana GN=TRP2 PE=1 SV=1	GO:0003691//double-stranded telomeric DNA binding;GO:0003677//DNA binding;GO:0000783//nuclear telomere cap complex;GO:0031627//telomeric loop formation
Unigene56613_All			putative protein [Arabidopsis thaliana] >CAB81471.1 putative protein [Arabidopsis thaliana]			GO:0008168//methyltransferase activity;GO:0003676//nucleic acid binding
CL5020.Contig1_All	K10691//E3 ubiquitin-protein ligase UBR4 [EC:2.3.2.27]	XM_010239020.2 PREDICTED: Brachypodium distachyon auxin transport protein BIG (LOC100830348), mRNA	E3 ubiquitin-protein ligase UBR4 [Triticum urartu]	E3 ubiquitin-protein ligase UBR4	Auxin transport protein BIG OS=Oryza sativa subsp. japonica GN=Os09g0247700 PE=2 SV=1
Unigene93085_All			hypothetical protein PAHAL_E00454 [Panicum hallii]
CL4466.Contig6_All	K02184//formin 2;K05747//Wiskott-Aldrich syndrome protein+ko04144//Endocytosis	XM_003574366.3 PREDICTED: Brachypodium distachyon uncharacterized LOC100846834 (LOC100846834), mRNA	uncharacterized protein LOC109778291 [Aegilops tauschii subsp. tauschii]	TraB family	Formin-like protein 14 OS=Arabidopsis thaliana GN=FH14 PE=3 SV=3
CL17121.Contig23_All		FP091265.1 Phyllostachys edulis cDNA clone: bphylf029a02, full insert sequence	PREDICTED: uncharacterized protein LOC104582693 [Brachypodium distachyon] >KQK13757.1 hypothetical protein BRADI_1g12280 [Brachypodium distachyon]	HPP family		GO:0016021//integral component of membrane
CL5686.Contig9_All	K08835//serine/threonine-protein kinase OSR1/STK39 [EC:2.7.11.1]	XM_010229394.2 PREDICTED: Brachypodium distachyon serine/threonine-protein kinase BLUS1 (LOC100829887), transcript variant X3, mRNA	serine/threonine-protein kinase BLUS1 isoform X2 [Aegilops tauschii subsp. tauschii]	Protein kinase domain	Serine/threonine-protein kinase BLUS1 OS=Arabidopsis thaliana GN=BLUS1 PE=1 SV=1	GO:0023014//signal transduction by protein phosphorylation;GO:0007346//regulation of mitotic cell cycle;GO:0004674//protein serine/threonine kinase activity;GO:0005524//ATP binding;GO:0032147//activation of protein kinase activity;GO:0031098//stress-activated protein kinase signaling cascade;GO:0005737//cytoplasm
Unigene37311_All	K11426//SET and MYND domain-containing protein	XM_014895967.1 PREDICTED: Brachypodium distachyon protein SET DOMAIN GROUP 41 (LOC100823220), transcript variant X1, mRNA	protein SET DOMAIN GROUP 41 isoform X2 [Aegilops tauschii subsp. tauschii]	Leucine rich repeat N-terminal domain	Protein SET DOMAIN GROUP 41 OS=Arabidopsis thaliana GN=SDG41 PE=2 SV=1
Unigene49895_All	K18643//katanin p80 WD40 repeat-containing subunit B1	XM_010232527.2 PREDICTED: Brachypodium distachyon uncharacterized LOC100828879 (LOC100828879), mRNA	PREDICTED: uncharacterized protein LOC100828879 [Brachypodium distachyon] >KQK04104.1 hypothetical protein BRADI_2g11720 [Brachypodium distachyon]	Protein of unknown function (DUF789)
CL2121.Contig8_All	K14398//cleavage and polyadenylation specificity factor subunit 6/7+ko03015//mRNA surveillance pathway	AP014964.1 Oryza sativa Japonica Group DNA, chromosome 8, cultivar: Nipponbare, complete sequence	PREDICTED: translation initiation factor IF-2-like [Oryza brachyantha]	RNA recognition motif. (a.k.a. RRM, RBD, or RNP domain)	Splicing factor U2af large subunit B OS=Oryza sativa subsp. japonica GN=U2AF65B PE=3 SV=2	GO:0003723//RNA binding
CL8570.Contig4_All	K17964//leucine-rich PPR motif-containing protein, mitochondrial	AK360902.1 Hordeum vulgare subsp. vulgare mRNA for predicted protein, complete cds, clone: NIASHv1128A15	pentatricopeptide repeat-containing protein At5g18390, mitochondrial [Aegilops tauschii subsp. tauschii] >XP_020146735.1 pentatricopeptide repeat-containing protein At5g18390, mitochondrial [Aegilops tauschii subsp. tauschii]	PPR repeat family	Pentatricopeptide repeat-containing protein At5g18390, mitochondrial OS=Arabidopsis thaliana GN=At5g18390 PE=2 SV=2	GO:0043231//intracellular membrane-bounded organelle;GO:0003723//RNA binding;GO:0009451//RNA modification;GO:0004519//endonuclease activity
Unigene33831_All	K10750//chromatin assembly factor 1 subunit A	XM_010236835.2 PREDICTED: Brachypodium distachyon chromatin assembly factor 1 subunit FSM (LOC100846224), mRNA	PREDICTED: chromatin assembly factor 1 subunit FSM [Brachypodium distachyon] >KQJ98321.1 hypothetical protein BRADI_3g36190 [Brachypodium distachyon] >KQJ98322.1 hypothetical protein BRADI_3g36190 [Brachypodium distachyon]	Chromatin assembly factor 1 subunit A	Chromatin assembly factor 1 subunit FSM OS=Oryza sativa subsp. japonica GN=FSM PE=2 SV=1	GO:0005634//nucleus;GO:0009555//pollen development;GO:0006334//nucleosome assembly;GO:0033186//CAF-1 complex;GO:0010448//vegetative meristem growth;GO:0010026//trichome differentiation;GO:0010449//root meristem growth;GO:0008283//cell proliferation;GO:0009934//regulation of meristem structural organization;GO:0031507//heterochromatin assembly;GO:0000724//double-strand break repair via homologous …
CL10205.Contig5_All	K08504//blocked early in transport 1+ko04130//SNARE interactions in vesicular transport	XM_003573170.3 PREDICTED: Brachypodium distachyon bet1-like SNARE 1-1 (LOC100839222), mRNA	bet1-like SNARE 1-1 [Sorghum bicolor] >EES14052.2 hypothetical protein SORBI_3007G165300 [Sorghum bicolor]	SNARE domain	Bet1-like SNARE 1-1 OS=Arabidopsis thaliana GN=BET11 PE=1 SV=1	GO:0016021//integral component of membrane
Unigene34899_All	K16670//homeobox protein Meis2;K15613//homeobox protein Meis1	XM_020305404.1 PREDICTED: Aegilops tauschii subsp. tauschii homeobox protein BEL1 homolog (LOC109746279), mRNA	homeobox protein BEL1 homolog [Aegilops tauschii subsp. tauschii]	Associated with HOX	BEL1-like homeodomain protein 2 OS=Arabidopsis thaliana GN=BLH2 PE=1 SV=3	GO:0003677//DNA binding;GO:0005634//nucleus;GO:0006355//regulation of transcription, DNA-templated
CL5830.Contig6_All	K10706//senataxin [EC:3.6.4.-]	XM_010236646.2 PREDICTED: Brachypodium distachyon uncharacterized LOC100831140 (LOC100831140), mRNA	PREDICTED: uncharacterized protein LOC100831140 [Brachypodium distachyon] >KQJ97601.1 hypothetical protein BRADI_3g32160 [Brachypodium distachyon]	AAA domain	Probable RNA helicase SDE3 OS=Arabidopsis thaliana GN=SDE3 PE=1 SV=1
CL5748.Contig6_All	K06694//26S proteasome non-ATPase regulatory subunit 10	XM_003559142.3 PREDICTED: Brachypodium distachyon 26S proteasome non-ATPase regulatory subunit 10 (LOC100820844), mRNA	PREDICTED: 26S proteasome non-ATPase regulatory subunit 10 [Brachypodium distachyon] >KQK13097.1 hypothetical protein BRADI_1g08040 [Brachypodium distachyon]	Ankyrin repeats (3 copies)	Acyl-CoA-binding domain-containing protein 1 OS=Arabidopsis thaliana GN=ACBP1 PE=1 SV=2	GO:0000502//proteasome complex;GO:0005618//cell wall
CL8870.Contig1_All	K09838//zeaxanthin epoxidase [EC:1.14.15.21]+ko00906//Carotenoid biosynthesis+ko01100//Metabolic pathways+ko01110//Biosynthesis of secondary metabolites	XM_020310961.1 PREDICTED: Aegilops tauschii subsp. tauschii FAD-dependent urate hydroxylase (LOC109752095), transcript variant X1, mRNA	predicted protein [Hordeum vulgare subsp. vulgare]	FAD binding domain	Monooxygenase 3 OS=Arabidopsis thaliana GN=MO3 PE=2 SV=1	GO:0044550//secondary metabolite biosynthetic process;GO:0004497//monooxygenase activity;GO:0071949//FAD binding
CL10812.Contig3_All		XM_003568196.3 PREDICTED: Brachypodium distachyon uncharacterized LOC100822847 (LOC100822847), mRNA	predicted protein [Hordeum vulgare subsp. vulgare]			GO:0016021//integral component of membrane
CL14755.Contig3_All	K21952//CASK-interacting protein;K01051//pectinesterase [EC:3.1.1.11]+ko00040//Pentose and glucuronate interconversions+ko01100//Metabolic pathways;K00430//peroxidase [EC:1.11.1.7]+ko01100//Metabolic pathways+ko01110//Biosynthesis of secondary metabolites+ko00940//Phenylpropanoid biosynthesis		PREDICTED: proline-rich receptor-like protein kinase PERK1 isoform X1 [Nicotiana tomentosiformis] >XP_009596096.1 PREDICTED: proline-rich receptor-like protein kinase PERK1 isoform X1 [Nicotiana tomentosiformis]		Protein argonaute 3 OS=Arabidopsis thaliana GN=AGO3 PE=3 SV=1
CL8003.Contig3_All	K20283//golgin subfamily A member 4	XM_015783879.1 PREDICTED: Oryza sativa Japonica Group uncharacterized LOC4339217 (LOC4339217), mRNA	hypothetical protein OsI_20484 [Oryza sativa Indica Group] >EEE64241.1 hypothetical protein OsJ_19074 [Oryza sativa Japonica Group]	Centromere protein H (CENP-H)	Protein BRANCHLESS TRICHOME OS=Arabidopsis thaliana GN=BLT PE=1 SV=1
CL10830.Contig5_All	K03593//ATP-binding protein involved in chromosome partitioning	XM_020311663.1 PREDICTED: Aegilops tauschii subsp. tauschii cytosolic Fe-S cluster assembly factor NBP35-like (LOC109752761), mRNA	PREDICTED: cytosolic Fe-S cluster assembly factor NBP35 [Brachypodium distachyon] >KQK00205.1 hypothetical protein BRADI_3g47930 [Brachypodium distachyon]	NUBPL iron-transfer P-loop NTPase	Cytosolic Fe-S cluster assembly factor NBP35 OS=Arabidopsis thaliana GN=NBP35 PE=1 SV=1	GO:0016226//iron-sulfur cluster assembly;GO:0046872//metal ion binding;GO:0005524//ATP binding;GO:0051539//4 iron, 4 sulfur cluster binding;GO:0005737//cytoplasm
CL9924.Contig3_All	K18999//RNA polymerase II C-terminal domain phosphatase-like 3/4 [EC:3.1.3.16]	XM_003577484.3 PREDICTED: Brachypodium distachyon RNA polymerase II C-terminal domain phosphatase-like 3 (LOC100836693), mRNA	PREDICTED: RNA polymerase II C-terminal domain phosphatase-like 3 [Brachypodium distachyon] >KQJ88441.1 hypothetical protein BRADI_4g17960 [Brachypodium distachyon]	NLI interacting factor-like phosphatase	RNA polymerase II C-terminal domain phosphatase-like 4 OS=Arabidopsis thaliana GN=CPL4 PE=1 SV=1	GO:0005634//nucleus;GO:0008420//CTD phosphatase activity;GO:0008022//protein C-terminus binding;GO:0004721//phosphoprotein phosphatase activity;GO:0070940//dephosphorylation of RNA polymerase II C-terminal domain;GO:0009651//response to salt stress;GO:0009788//negative regulation of abscisic acid-activated signaling pathway;GO:0016591//DNA-directed RNA polymerase II, holoenzyme
CL12808.Contig3_All	K15414//complement component 1 Q subcomponent-binding protein, mitochondrial	FP092648.1 Phyllostachys edulis cDNA clone: bphyem122o22, full insert sequence	PREDICTED: uncharacterized protein At2g39795, mitochondrial-like [Brachypodium distachyon] >KQK18465.1 hypothetical protein BRADI_1g42640 [Brachypodium distachyon]	Mitochondrial glycoprotein	Uncharacterized protein At2g39790, mitochondrial OS=Arabidopsis thaliana GN=At2g39790 PE=3 SV=2	GO:0005759//mitochondrial matrix
CL10948.Contig4_All	K19042//E3 ubiquitin-protein ligase BOI and related proteins [EC:2.3.2.27]	AK368499.1 Hordeum vulgare subsp. vulgare mRNA for predicted protein, complete cds, clone: NIASHv2074M07	E3 ubiquitin-protein ligase BOI-like [Aegilops tauschii subsp. tauschii]	Zinc finger, C3HC4 type (RING finger)	Probable BOI-related E3 ubiquitin-protein ligase 2 OS=Arabidopsis thaliana GN=BRG2 PE=1 SV=1
CL15935.Contig3_All	K18693//diacylglycerol diphosphate phosphatase / phosphatidate phosphatase [EC:3.1.3.81 3.1.3.4]+ko01110//Biosynthesis of secondary metabolites+ko00564//Glycerophospholipid metabolism+ko00561//Glycerolipid metabolism;K19041//E3 ubiquitin-protein ligase RNF38/44 [EC:2.3.2.27];K10635//E3 ubiquitin-protein ligase Arkadia [EC:2.3.2.27]	XM_020330145.1 PREDICTED: Aegilops tauschii subsp. tauschii protein PLASTID MOVEMENT IMPAIRED 2-like (LOC109771445), mRNA	PREDICTED: protein PLASTID MOVEMENT IMPAIRED 2-like [Oryza brachyantha]	Weak chloroplast movement under blue light	Probable E3 ubiquitin-protein ligase HIP1 OS=Oryza sativa subsp. japonica GN=HIP1 PE=1 SV=2
CL8264.Contig15_All		XM_010229629.2 PREDICTED: Brachypodium distachyon uncharacterized LOC100821383 (LOC100821383), transcript variant X2, mRNA	PREDICTED: uncharacterized protein LOC100821383 isoform X2 [Brachypodium distachyon] >KQK19231.1 hypothetical protein BRADI_1g47067 [Brachypodium distachyon]
CL7881.Contig4_All	K09775//uncharacterized protein	XM_020292321.1 PREDICTED: Aegilops tauschii subsp. tauschii uncharacterized membrane protein YuiD-like (LOC109733096), mRNA	PREDICTED: uncharacterized membrane protein YuiD-like, partial [Oryza brachyantha]	Divergent PAP2 family		GO:0016021//integral component of membrane
CL10700.Contig1_All	K13343//peroxin-14+ko04146//Peroxisome;K04733//interleukin-1 receptor-associated kinase 4 [EC:2.7.11.1];K11699//RNA-dependent RNA polymerase [EC:2.7.7.48];K13415//protein brassinosteroid insensitive 1 [EC:2.7.10.1 2.7.11.1]+ko04075//Plant hormone signal transduction	XR_001404710.1 PREDICTED: Brachypodium distachyon uncharacterized LOC104585291 (LOC104585291), transcript variant X2, ncRNA	uncharacterized protein LOC109779784 [Aegilops tauschii subsp. tauschii]
CL15742.Contig22_All	K08869//aarF domain-containing kinase	XM_020339810.1 PREDICTED: Aegilops tauschii subsp. tauschii uncharacterized protein slr0889-like (LOC109781211), transcript variant X2, mRNA	PREDICTED: uncharacterized protein slr0889 [Oryza sativa Japonica Group] >BAD82793.1 ABC1-like [Oryza sativa Japonica Group] >BAF07035.1 Os01g0904200 [Oryza sativa Japonica Group] >BAG90909.1 unnamed protein product [Oryza sativa Japonica Group] >BAS75776.1 Os01g0904200 [Oryza sativa Japonica Group]	ABC1 family	Protein ACTIVITY OF BC1 COMPLEX KINASE 3, chloroplastic OS=Arabidopsis thaliana GN=ABC1K3 PE=1 SV=1	GO:0005524//ATP binding;GO:0004672//protein kinase activity
CL14535.Contig1_All		XM_020310007.1 PREDICTED: Aegilops tauschii subsp. tauschii uncharacterized LOC109751069 (LOC109751069), mRNA	PREDICTED: uncharacterized protein LOC100842526 [Brachypodium distachyon] >KQK15657.1 hypothetical protein BRADI_1g24220 [Brachypodium distachyon]			GO:0016021//integral component of membrane
CL740.Contig11_All	K04733//interleukin-1 receptor-associated kinase 4 [EC:2.7.11.1]	XM_010232039.2 PREDICTED: Brachypodium distachyon uncharacterized LOC100836432 (LOC100836432), transcript variant X4, mRNA	PREDICTED: uncharacterized protein LOC100836432 isoform X4 [Brachypodium distachyon] >KQK02308.1 hypothetical protein BRADI_2g00710 [Brachypodium distachyon]	Coiled-coil N-terminus of cGMP-dependent protein kinase
CL4921.Contig16_All	K05954//protein farnesyltransferase subunit beta [EC:2.5.1.58]+ko00900//Terpenoid backbone biosynthesis	XM_010233977.2 PREDICTED: Brachypodium distachyon pentatricopeptide repeat-containing protein At4g32450, mitochondrial-like (LOC100842540), mRNA	PREDICTED: pentatricopeptide repeat-containing protein At4g32450, mitochondrial-like [Brachypodium distachyon] >KQK09627.1 hypothetical protein BRADI_2g49207 [Brachypodium distachyon]	DYW family of nucleic acid deaminases	Protein farnesyltransferase subunit beta OS=Pisum sativum GN=FTB PE=1 SV=1	GO:0043231//intracellular membrane-bounded organelle;GO:0003723//RNA binding;GO:0008270//zinc ion binding;GO:0009451//RNA modification;GO:0004519//endonuclease activity
Unigene63995_All	K11254//histone H4	FP096282.1 Phyllostachys edulis cDNA clone: bphyst014f09, full insert sequence	uncharacterized protein LOC103634138 [Zea mays]	Centromere kinetochore component CENP-T histone fold	Histone H4 OS=Glycine max PE=3 SV=1
CL2983.Contig4_All	K21989//calcium permeable stress-gated cation channel	XM_014902949.1 PREDICTED: Brachypodium distachyon calmodulin-binding protein 60 F-like (LOC100824315), transcript variant X2, mRNA	hypothetical protein BRADI_4g04880 [Brachypodium distachyon] >KQJ86349.1 hypothetical protein BRADI_4g04880 [Brachypodium distachyon]	Calmodulin binding protein-like	Calmodulin-binding protein 60 B OS=Arabidopsis thaliana GN=CBP60B PE=2 SV=1	GO:0006950//response to stress;GO:0005516//calmodulin binding
CL16602.Contig2_All	K21776//protein lin-54	XM_015837288.1 PREDICTED: Oryza brachyantha CRC domain-containing protein TSO1-like (LOC102719019), mRNA	PREDICTED: protein tesmin/TSO1-like CXC 3 isoform X1 [Brachypodium distachyon] >KQK05494.1 hypothetical protein BRADI_2g20347 [Brachypodium distachyon]	Tesmin/TSO1-like CXC domain, cysteine-rich domain	Protein tesmin/TSO1-like CXC 3 OS=Arabidopsis thaliana GN=TCX3 PE=1 SV=1
Unigene27291_All	K13412//calcium-dependent protein kinase [EC:2.7.11.1]+ko04626//Plant-pathogen interaction	XM_003577735.3 PREDICTED: Brachypodium distachyon calcium-dependent protein kinase SK5-like (LOC100835577), mRNA	PREDICTED: calcium-dependent protein kinase SK5-like [Oryza brachyantha]	Protein kinase domain	Calcium-dependent protein kinase 28 OS=Oryza sativa subsp. japonica GN=CPK28 PE=3 SV=1	GO:0005634//nucleus;GO:0009738//abscisic acid-activated signaling pathway;GO:0005524//ATP binding;GO:0035556//intracellular signal transduction;GO:0005737//cytoplasm;GO:0046777//protein autophosphorylation;GO:0018105//peptidyl-serine phosphorylation;GO:0004674//protein serine/threonine kinase activity;GO:0005509//calcium ion binding;GO:0004683//calmodulin-dependent protein kinase activity;GO:0004…
Unigene848_All	K01433//formyltetrahydrofolate deformylase [EC:3.5.1.10]+ko00670//One carbon pool by folate+ko00630//Glyoxylate and dicarboxylate metabolism	XM_003558993.3 PREDICTED: Brachypodium distachyon formyltetrahydrofolate deformylase 2, mitochondrial (LOC100844926), mRNA	PREDICTED: formyltetrahydrofolate deformylase 2, mitochondrial [Brachypodium distachyon] >KQK24163.1 hypothetical protein BRADI_1g78480 [Brachypodium distachyon]	Formyl transferase	Formyltetrahydrofolate deformylase 2, mitochondrial OS=Arabidopsis thaliana GN=PURU2 PE=1 SV=1	GO:0008864//formyltetrahydrofolate deformylase activity;GO:0016742//hydroxymethyl-, formyl- and related transferase activity;GO:0006189//'de novo' IMP biosynthetic process
CL8685.Contig2_All	K10849//DNA excision repair protein ERCC-1+ko03420//Nucleotide excision repair	XM_020336588.1 PREDICTED: Aegilops tauschii subsp. tauschii DNA excision repair protein ERCC-1 (LOC109778025), mRNA	predicted protein [Hordeum vulgare subsp. vulgare]	Binding domain of DNA repair protein Ercc1 (rad10/Swi10)	DNA excision repair protein ERCC-1 OS=Arabidopsis thaliana GN=ERCC1 PE=2 SV=1	GO:0005634//nucleus;GO:0070522//ERCC4-ERCC1 complex;GO:0010213//non-photoreactive DNA repair;GO:0017108//5'-flap endonuclease activity;GO:0006296//nucleotide-excision repair, DNA incision, 5'-to lesion;GO:0000014//single-stranded DNA endodeoxyribonuclease activity;GO:0010224//response to UV-B;GO:0010332//response to gamma radiation;GO:0006294//nucleotide-excision repair, preincision complex assem…
CL16220.Contig3_All	K01513//ectonucleotide pyrophosphatase/phosphodiesterase family member 1/3 [EC:3.1.4.1 3.6.1.9]+ko00740//Riboflavin metabolism+ko00230//Purine metabolism+ko00770//Pantothenate and CoA biosynthesis+ko01100//Metabolic pathways+ko00760//Nicotinate and nicotinamide metabolism+ko00500//Starch and sucrose metabolism+ko00240//Pyrimidine metabolism	XM_003574242.3 PREDICTED: Brachypodium distachyon uncharacterized LOC100833809 (LOC100833809), mRNA	PREDICTED: uncharacterized protein LOC100833809 [Brachypodium distachyon] >KQJ93222.1 hypothetical protein BRADI_3g03260 [Brachypodium distachyon]	Plant protein 1589 of unknown function (A_thal_3526)
CL16365.Contig8_All	K01689//enolase [EC:4.2.1.11]+ko00010//Glycolysis / Gluconeogenesis+ko01230//Biosynthesis of amino acids+ko03018//RNA degradation+ko01100//Metabolic pathways+ko01110//Biosynthesis of secondary metabolites+ko01200//Carbon metabolism	XM_020316217.1 PREDICTED: Aegilops tauschii subsp. tauschii cytosolic enolase 3 (LOC109757391), transcript variant X2, mRNA	cytosolic enolase 3 isoform X2 [Aegilops tauschii subsp. tauschii]	Enolase, C-terminal TIM barrel domain	Cytosolic enolase 3 OS=Arabidopsis thaliana GN=ENO3 PE=1 SV=1	GO:0000287//magnesium ion binding;GO:0005634//nucleus;GO:0004634//phosphopyruvate hydratase activity;GO:0006096//glycolytic process;GO:0000015//phosphopyruvate hydratase complex
CL13066.Contig4_All		FP101493.1 Phyllostachys edulis cDNA clone: bphylf003m16, full insert sequence
Unigene65681_All	K01754//threonine dehydratase [EC:4.3.1.19]+ko00290//Valine, leucine and isoleucine biosynthesis+ko01230//Biosynthesis of amino acids+ko01100//Metabolic pathways+ko01110//Biosynthesis of secondary metabolites+ko00260//Glycine, serine and threonine metabolism+ko01200//Carbon metabolism	XM_003559483.3 PREDICTED: Brachypodium distachyon threonine dehydratase biosynthetic, chloroplastic-like (LOC100838038), mRNA	Threonine dehydratase biosynthetic, chloroplastic [Dichanthelium oligosanthes]	Pyridoxal-phosphate dependent enzyme	Threonine dehydratase biosynthetic, chloroplastic OS=Arabidopsis thaliana GN=OMR1 PE=1 SV=1	GO:0009097//isoleucine biosynthetic process;GO:0030170//pyridoxal phosphate binding;GO:0004794//L-threonine ammonia-lyase activity
Unigene61206_All	K01934//5-formyltetrahydrofolate cyclo-ligase [EC:6.3.3.2]+ko00670//One carbon pool by folate+ko01100//Metabolic pathways	AK331535.1 Triticum aestivum cDNA, clone: WT007_L24, cultivar: Chinese Spring	predicted protein [Hordeum vulgare subsp. vulgare]		5-formyltetrahydrofolate cyclo-ligase, mitochondrial OS=Arabidopsis thaliana GN=5FCL PE=1 SV=1	GO:0046872//metal ion binding;GO:0005524//ATP binding;GO:0035999//tetrahydrofolate interconversion;GO:0005739//mitochondrion;GO:0030272//5-formyltetrahydrofolate cyclo-ligase activity;GO:0009396//folic acid-containing compound biosynthetic process
CL4243.Contig17_All	K20222//importin-5	XM_003562797.3 PREDICTED: Brachypodium distachyon importin-5 (LOC100821182), transcript variant X1, mRNA	importin-5-like [Aegilops tauschii subsp. tauschii]	HEAT repeat		GO:0031965//nuclear membrane;GO:0006607//NLS-bearing protein import into nucleus;GO:0008565//protein transporter activity;GO:0000060//protein import into nucleus, translocation;GO:0005737//cytoplasm;GO:0008139//nuclear localization sequence binding;GO:0034399//nuclear periphery;GO:0008536//Ran GTPase binding;GO:0006610//ribosomal protein import into nucleus
Unigene50565_All	K01802//peptidylprolyl isomerase [EC:5.2.1.8]	XM_020306680.1 PREDICTED: Aegilops tauschii subsp. tauschii peptidyl-prolyl cis-trans isomerase FKBP13, chloroplastic-like (LOC109747648), mRNA	FKBP-type peptidyl-prolyl cis-trans isomerase 3, chloroplastic [Triticum urartu]	FKBP-type peptidyl-prolyl cis-trans isomerase	Peptidyl-prolyl cis-trans isomerase FKBP13, chloroplastic OS=Arabidopsis thaliana GN=FKBP13 PE=1 SV=2	GO:0003755//peptidyl-prolyl cis-trans isomerase activity;GO:0031977//thylakoid lumen;GO:0005528//FK506 binding;GO:0005737//cytoplasm;GO:0061077//chaperone-mediated protein folding;GO:0009507//chloroplast
CL7501.Contig4_All	K08332//vacuolar protein 8	XM_003565015.3 PREDICTED: Brachypodium distachyon U-box domain-containing protein 43-like (LOC100830917), transcript variant X1, mRNA	PREDICTED: U-box domain-containing protein 43-like isoform X1 [Brachypodium distachyon] >KQK11534.1 hypothetical protein BRADI_2g60700 [Brachypodium distachyon]	Armadillo/beta-catenin-like repeat	U-box domain-containing protein 2 OS=Arabidopsis thaliana GN=PUB2 PE=2 SV=1	GO:0005634//nucleus;GO:0005737//cytoplasm
Unigene13111_All	K11649//SWI/SNF related-matrix-associated actin-dependent regulator of chromatin subfamily C	XM_020310478.1 PREDICTED: Aegilops tauschii subsp. tauschii SWI/SNF complex subunit SWI3D (LOC109751595), transcript variant X1, mRNA	PREDICTED: SWI/SNF complex subunit SWI3D isoform X1 [Brachypodium distachyon]	SWIRM-associated region 1	Transcriptional adapter ADA2 OS=Oryza sativa subsp. japonica GN=ADA2 PE=2 SV=2	GO:0003677//DNA binding;GO:0005634//nucleus;GO:0008270//zinc ion binding
CL5738.Contig6_All		AK330618.1 Triticum aestivum cDNA, clone: SET4_O07, cultivar: Chinese Spring	PREDICTED: F-box/kelch-repeat protein At5g43190-like [Brachypodium distachyon] >KQK04445.1 hypothetical protein BRADI_2g13540 [Brachypodium distachyon]	Kelch motif	F-box/kelch-repeat protein At5g15710 OS=Arabidopsis thaliana GN=At5g15710 PE=2 SV=1	GO:0031146//SCF-dependent proteasomal ubiquitin-dependent protein catabolic process;GO:0004842//ubiquitin-protein transferase activity
Unigene42397_All	K05572//NAD(P)H-quinone oxidoreductase subunit 1 [EC:1.6.5.3]+ko01100//Metabolic pathways+ko00190//Oxidative phosphorylation	KT692644.1 Stipa lipskyi voucher Stipa lipskyi chloroplast, complete genome	NADH-plastoquinone oxidoreductase subunit 1 (chloroplast) [Stipa lipskyi] >ALM02976.1 NADH-plastoquinone oxidoreductase subunit 1 (chloroplast) [Stipa lipskyi]		NAD(P)H-quinone oxidoreductase subunit 1, chloroplastic OS=Hordeum vulgare GN=ndhA PE=2 SV=4	GO:0009535//chloroplast thylakoid membrane;GO:0019684//photosynthesis, light reaction;GO:0016021//integral component of membrane;GO:0048038//quinone binding;GO:0009536//plastid;GO:0016655//oxidoreductase activity, acting on NAD(P)H, quinone or similar compound as acceptor;GO:0005886//plasma membrane
CL5399.Contig1_All	K01893//asparaginyl-tRNA synthetase [EC:6.1.1.22]+ko00970//Aminoacyl-tRNA biosynthesis	AK363705.1 Hordeum vulgare subsp. vulgare mRNA for predicted protein, complete cds, clone: NIASHv2018D02	PREDICTED: asparagine--tRNA ligase, cytoplasmic 1-like [Brachypodium distachyon] >KQK07517.1 hypothetical protein BRADI_2g35987 [Brachypodium distachyon]	tRNA synthetases class II (D, K and N)	Asparagine--tRNA ligase, cytoplasmic 3 OS=Arabidopsis thaliana GN=SYNC3 PE=1 SV=1	GO:0006421//asparaginyl-tRNA aminoacylation;GO:0005524//ATP binding;GO:0004816//asparagine-tRNA ligase activity;GO:0005737//cytoplasm;GO:0003676//nucleic acid binding
CL11911.Contig4_All	K08176//MFS transporter, PHS family, inorganic phosphate transporter	FP093709.1 Phyllostachys edulis cDNA clone: bphylf034n14, full insert sequence	PREDICTED: plastid division protein PDV1-like [Brachypodium distachyon] >KQJ94309.1 hypothetical protein BRADI_3g09790 [Brachypodium distachyon]	Telomere stability and silencing	Plastid division protein PDV2 OS=Arabidopsis thaliana GN=PDV2 PE=1 SV=1
CL6988.Contig7_All	K10990//RecQ-mediated genome instability protein 1;K00430//peroxidase [EC:1.11.1.7]+ko01100//Metabolic pathways+ko01110//Biosynthesis of secondary metabolites+ko00940//Phenylpropanoid biosynthesis	XM_003571298.3 PREDICTED: Brachypodium distachyon uncharacterized LOC100832559 (LOC100832559), mRNA	predicted protein [Hordeum vulgare subsp. vulgare]	Protein of unknown function (DUF3537)	Proline-rich receptor-like protein kinase PERK9 OS=Arabidopsis thaliana GN=PERK9 PE=1 SV=1	GO:0005634//nucleus;GO:0016021//integral component of membrane
Unigene40476_All	K01188//beta-glucosidase [EC:3.2.1.21]+ko01100//Metabolic pathways+ko00500//Starch and sucrose metabolism+ko01110//Biosynthesis of secondary metabolites+ko00460//Cyanoamino acid metabolism+ko00940//Phenylpropanoid biosynthesis;K22804//structural maintenance of chromosomes protein 6		hypothetical protein OsJ_27492 [Oryza sativa Japonica Group]
CL6630.Contig4_All	K08901//photosystem II oxygen-evolving enhancer protein 3+ko01100//Metabolic pathways+ko00195//Photosynthesis	XM_020337423.1 PREDICTED: Aegilops tauschii subsp. tauschii photosynthetic NDH subunit of lumenal location 2, chloroplastic-like (LOC109778840), mRNA	predicted protein [Hordeum vulgare subsp. vulgare]	Oxygen evolving enhancer protein 3 (PsbQ)	Photosynthetic NDH subunit of lumenal location 2, chloroplastic OS=Arabidopsis thaliana GN=PNSL2 PE=1 SV=1	GO:0009535//chloroplast thylakoid membrane;GO:0005509//calcium ion binding;GO:0009344//nitrite reductase complex [NAD(P)H];GO:0019898//extrinsic component of membrane;GO:0009767//photosynthetic electron transport chain;GO:0045156//electron transporter, transferring electrons within the cyclic electron transport pathway of photosynthesis activity;GO:0009654//photosystem II oxygen evolving complex
CL4788.Contig36_All	K21989//calcium permeable stress-gated cation channel	XM_020299581.1 PREDICTED: Aegilops tauschii subsp. tauschii calmodulin-binding protein 60 D-like (LOC109740532), transcript variant X1, mRNA	hypothetical protein TRIUR3_12862 [Triticum urartu]	Calmodulin binding protein-like	Calmodulin-binding protein 60 D OS=Arabidopsis thaliana GN=CBP60D PE=2 SV=1
CL3422.Contig5_All	K03809//NAD(P)H dehydrogenase (quinone) [EC:1.6.5.2]+ko00130//Ubiquinone and other terpenoid-quinone biosynthesis+ko01110//Biosynthesis of secondary metabolites	XM_010236449.2 PREDICTED: Brachypodium distachyon probable NAD(P)H dehydrogenase (quinone) FQR1-like 1 (LOC100832979), transcript variant X1, mRNA	flavoprotein wrbA [Zea mays] >ACG26695.1 flavoprotein wrbA [Zea mays] >AQK65362.1 Flavoprotein wrbA [Zea mays] >AQK65363.1 Flavoprotein wrbA [Zea mays]	NADPH-dependent FMN reductase	Probable NAD(P)H dehydrogenase (quinone) FQR1-like 2 OS=Arabidopsis thaliana GN=At4g36750 PE=1 SV=1	GO:0010181//FMN binding;GO:0003955//NAD(P)H dehydrogenase (quinone) activity
CL870.Contig20_All		XM_020296071.1 PREDICTED: Aegilops tauschii subsp. tauschii uncharacterized LOC109736849 (LOC109736849), transcript variant X1, mRNA	PREDICTED: uncharacterized protein LOC100844800 isoform X2 [Brachypodium distachyon] >KQK00067.1 hypothetical protein BRADI_3g47140 [Brachypodium distachyon]	Intermediate filament protein		GO:0016021//integral component of membrane
CL15641.Contig30_All	K20717//mitogen-activated protein kinase kinase kinase YODA [EC:2.7.11.25]+ko04016//MAPK signaling pathway - plant	XM_003580265.3 PREDICTED: Brachypodium distachyon mitogen-activated protein kinase kinase kinase YODA-like (LOC100844738), transcript variant X1, mRNA	PREDICTED: mitogen-activated protein kinase kinase kinase YODA-like [Brachypodium distachyon] >XP_010240238.1 PREDICTED: mitogen-activated protein kinase kinase kinase YODA-like [Brachypodium distachyon] >KQJ84015.1 hypothetical protein BRADI_5g18180 [Brachypodium distachyon]	Protein kinase domain	Mitogen-activated protein kinase kinase kinase YODA OS=Arabidopsis thaliana GN=YDA PE=1 SV=1	GO:0023014//signal transduction by protein phosphorylation;GO:0007346//regulation of mitotic cell cycle;GO:0005524//ATP binding;GO:0032147//activation of protein kinase activity;GO:0005737//cytoplasm;GO:0004674//protein serine/threonine kinase activity;GO:0004672//protein kinase activity;GO:0031098//stress-activated protein kinase signaling cascade
CL9412.Contig4_All	K14325//RNA-binding protein with serine-rich domain 1+ko03015//mRNA surveillance pathway+ko03013//RNA transport;K13172//serine/arginine repetitive matrix protein 2	HG670306.1 Triticum aestivum chromosome 3B, genomic scaffold, cultivar Chinese Spring	uncharacterized protein LOC109756362 [Aegilops tauschii subsp. tauschii]		Serine/arginine-rich splicing factor SR45 OS=Arabidopsis thaliana GN=SR45 PE=1 SV=1
Unigene53111_All	K01240//uridine nucleosidase [EC:3.2.2.3]+ko00760//Nicotinate and nicotinamide metabolism+ko00240//Pyrimidine metabolism	FP101226.1 Phyllostachys edulis cDNA clone: bphyem205a16, full insert sequence	predicted protein [Hordeum vulgare subsp. vulgare] >BAJ93219.1 predicted protein [Hordeum vulgare subsp. vulgare]	Inosine-uridine preferring nucleoside hydrolase	Probable uridine nucleosidase 1 OS=Oryza sativa subsp. japonica GN=URH1 PE=2 SV=1
CL7450.Contig7_All	K03787//5'-nucleotidase [EC:3.1.3.5]+ko00230//Purine metabolism+ko01100//Metabolic pathways+ko00760//Nicotinate and nicotinamide metabolism+ko01110//Biosynthesis of secondary metabolites+ko00240//Pyrimidine metabolism	XM_003557359.3 PREDICTED: Brachypodium distachyon 5'-nucleotidase SurE (LOC100836897), mRNA	PREDICTED: 5'-nucleotidase SurE [Brachypodium distachyon] >KQK20420.1 hypothetical protein BRADI_1g54410 [Brachypodium distachyon]	Survival protein SurE		GO:0005829//cytosol;GO:0008252//nucleotidase activity
CL6681.Contig23_All	K01510//apyrase [EC:3.6.1.5]+ko00230//Purine metabolism+ko00240//Pyrimidine metabolism	XM_003574506.3 PREDICTED: Brachypodium distachyon probable apyrase 6 (LOC100838315), transcript variant X1, mRNA	PREDICTED: probable apyrase 6 isoform X1 [Brachypodium distachyon] >KQJ98474.1 hypothetical protein BRADI_3g37110 [Brachypodium distachyon]	GDA1/CD39 (nucleoside phosphatase) family	Probable apyrase 6 OS=Arabidopsis thaliana GN=APY6 PE=2 SV=2	GO:0016787//hydrolase activity;GO:0016021//integral component of membrane
CL7286.Contig9_All	K04733//interleukin-1 receptor-associated kinase 4 [EC:2.7.11.1];K20547//basic endochitinase B [EC:3.2.1.14]+ko04016//MAPK signaling pathway - plant+ko00520//Amino sugar and nucleotide sugar metabolism+ko01100//Metabolic pathways;K20222//importin-5	FP096520.1 Phyllostachys edulis cDNA clone: bphyem125i12, full insert sequence	vesicle-associated protein 1-2-like [Aegilops tauschii subsp. tauschii]	MSP (Major sperm protein) domain	Vesicle-associated protein 3-1 OS=Arabidopsis thaliana GN=PVA31 PE=3 SV=1	GO:0016021//integral component of membrane;GO:0005789//endoplasmic reticulum membrane
CL3360.Contig7_All	K00434//L-ascorbate peroxidase [EC:1.11.1.11]+ko00053//Ascorbate and aldarate metabolism+ko00480//Glutathione metabolism	AK366200.1 Hordeum vulgare subsp. vulgare mRNA for predicted protein, complete cds, clone: NIASHv2041A21	probable L-ascorbate peroxidase 7, chloroplastic [Aegilops tauschii subsp. tauschii]	Peroxidase	Probable L-ascorbate peroxidase 7, chloroplastic OS=Oryza sativa subsp. japonica GN=APX7 PE=2 SV=1	GO:0020037//heme binding;GO:0034599//cellular response to oxidative stress;GO:0042744//hydrogen peroxide catabolic process;GO:0004130//cytochrome-c peroxidase activity;GO:0000302//response to reactive oxygen species;GO:0009507//chloroplast
Unigene26116_All	K19984//exocyst complex component 5	XM_003559492.3 PREDICTED: Brachypodium distachyon F-box protein At1g55000 (LOC100841079), mRNA	formin-like protein 3 isoform X1 [Zea mays]	F-box domain	Sulfated surface glycoprotein 185 OS=Volvox carteri PE=1 SV=1
CL1587.Contig15_All	K04733//interleukin-1 receptor-associated kinase 4 [EC:2.7.11.1]	XM_014900097.1 PREDICTED: Brachypodium distachyon putative receptor-like protein kinase At4g00960 (LOC100823420), transcript variant X2, mRNA	cysteine-rich receptor kinase [Triticum aestivum]	Protein tyrosine kinase	Cysteine-rich receptor-like protein kinase 6 OS=Oryza sativa subsp. japonica GN=CRK6 PE=1 SV=1	GO:0004674//protein serine/threonine kinase activity;GO:0005524//ATP binding;GO:0006468//protein phosphorylation;GO:0016021//integral component of membrane;GO:0005886//plasma membrane
CL3107.Contig13_All	K01814//phosphoribosylformimino-5-aminoimidazole carboxamide ribotide isomerase [EC:5.3.1.16]+ko01230//Biosynthesis of amino acids+ko01100//Metabolic pathways+ko00340//Histidine metabolism+ko01110//Biosynthesis of secondary metabolites	XM_003568438.3 PREDICTED: Brachypodium distachyon 1-(5-phosphoribosyl)-5-[(5-phosphoribosylamino)methylideneamino] imidazole-4-carboxamide isomerase, chloroplastic (LOC100845389), mRNA	PREDICTED: 1-(5-phosphoribosyl)-5-[(5-phosphoribosylamino)methylideneamino] imidazole-4-carboxamide isomerase, chloroplastic [Brachypodium distachyon] >KQK06356.1 hypothetical protein BRADI_2g25930 [Brachypodium distachyon]	Histidine biosynthesis protein	1-(5-phosphoribosyl)-5-[(5-phosphoribosylamino)methylideneamino] imidazole-4-carboxamide isomerase, chloroplastic OS=Arabidopsis thaliana GN=HISN3 PE=2 SV=1	GO:0003949//1-(5-phosphoribosyl)-5-[(5-phosphoribosylamino)methylideneamino]imidazole-4-carboxamide isomerase activity;GO:0000105//histidine biosynthetic process;GO:0000162//tryptophan biosynthetic process;GO:0005737//cytoplasm;GO:0009507//chloroplast
CL11325.Contig1_All		XM_003569397.3 PREDICTED: Brachypodium distachyon uncharacterized protein At1g15400-like (LOC100828090), mRNA	hypothetical protein PAHAL_E04155 [Panicum hallii]	Domain of unknown function (DUF4666)	MAPK kinase substrate protein At1g80180 OS=Arabidopsis thaliana GN=At1g80180 PE=1 SV=1
Unigene36175_All	K00939//adenylate kinase [EC:2.7.4.3]+ko00230//Purine metabolism+ko01100//Metabolic pathways+ko01110//Biosynthesis of secondary metabolites+ko00730//Thiamine metabolism	XR_001407091.1 PREDICTED: Brachypodium distachyon probable adenylate kinase 5, chloroplastic (LOC100845101), transcript variant X2, misc_RNA	PREDICTED: probable adenylate kinase 5, chloroplastic [Brachypodium distachyon] >XP_014756719.1 PREDICTED: probable adenylate kinase 5, chloroplastic [Brachypodium distachyon] >KQJ95938.1 hypothetical protein BRADI_3g19850 [Brachypodium distachyon] >KQJ95941.1 hypothetical protein BRADI_3g19850 [Brachypodium distachyon] >KQJ95942.1 hypothetical protein BRADI_3g19850 [Brachypodium distachyon] >KQJ…	Adenylate kinase	Probable adenylate kinase 5, chloroplastic OS=Oryza sativa subsp. japonica GN=Os08g0288200 PE=2 SV=2	GO:0009535//chloroplast thylakoid membrane;GO:0005524//ATP binding;GO:0009941//chloroplast envelope;GO:0004017//adenylate kinase activity
Unigene57937_All	K03283//heat shock 70kDa protein 1/2/6/8+ko03040//Spliceosome+ko04144//Endocytosis+ko04141//Protein processing in endoplasmic reticulum	XM_003578910.3 PREDICTED: Brachypodium distachyon uncharacterized LOC100835167 (LOC100835167), mRNA	uncharacterized protein LOC109787098 [Aegilops tauschii subsp. tauschii] >XP_020170774.1 uncharacterized protein LOC109756332 [Aegilops tauschii subsp. tauschii]	Lecithin retinol acyltransferase
CL37.Contig6_All	K00430//peroxidase [EC:1.11.1.7]+ko01100//Metabolic pathways+ko01110//Biosynthesis of secondary metabolites+ko00940//Phenylpropanoid biosynthesis;K02184//formin 2	XM_003580124.3 PREDICTED: Brachypodium distachyon probable sphingolipid transporter spinster homolog 2 (LOC100827950), mRNA	PREDICTED: probable sphingolipid transporter spinster homolog 2 [Brachypodium distachyon] >KQJ83683.1 hypothetical protein BRADI_5g16257 [Brachypodium distachyon]	Major Facilitator Superfamily	Probable sphingolipid transporter spinster homolog 2 OS=Arabidopsis thaliana GN=At5g64500 PE=2 SV=1	GO:0055085//transmembrane transport;GO:0016021//integral component of membrane
CL2833.Contig10_All	K20547//basic endochitinase B [EC:3.2.1.14]+ko04016//MAPK signaling pathway - plant+ko00520//Amino sugar and nucleotide sugar metabolism+ko01100//Metabolic pathways	XM_003564295.3 PREDICTED: Brachypodium distachyon uncharacterized LOC100844447 (LOC100844447), mRNA	hydroxyproline-rich glycoprotein DZ-HRGP [Volvox carteri f. nagariensis]		Vegetative cell wall protein gp1 OS=Chlamydomonas reinhardtii GN=GP1 PE=1 SV=1
Unigene39721_All
CL6385.Contig3_All	K01363//cathepsin B [EC:3.4.22.1]	FP094384.1 Phyllostachys edulis cDNA clone: bphyst036f06, full insert sequence	PREDICTED: cathepsin B isoform X1 [Oryza sativa Japonica Group] >XP_015639546.1 PREDICTED: cathepsin B isoform X1 [Oryza sativa Japonica Group]	Papain family cysteine protease	Cathepsin B-like protease 2 OS=Arabidopsis thaliana GN=CATHB2 PE=2 SV=1	GO:0004197//cysteine-type endopeptidase activity;GO:0050790//regulation of catalytic activity
CL10823.Contig4_All	K14325//RNA-binding protein with serine-rich domain 1+ko03015//mRNA surveillance pathway+ko03013//RNA transport	XM_020337017.1 PREDICTED: Aegilops tauschii subsp. tauschii protein CURVATURE THYLAKOID 1D, chloroplastic-like (LOC109778461), mRNA	protein CURVATURE THYLAKOID 1D, chloroplastic-like [Aegilops tauschii subsp. tauschii]	CAAD domains of cyanobacterial aminoacyl-tRNA synthetase	Protein CURVATURE THYLAKOID 1D, chloroplastic OS=Arabidopsis thaliana GN=CURT1D PE=1 SV=1	GO:0016021//integral component of membrane;GO:0009579//thylakoid
CL3907.Contig1_All	K21249//UV radiation resistance-associated gene protein	XM_020326031.1 PREDICTED: Aegilops tauschii subsp. tauschii UV radiation resistance-associated gene protein-like (LOC109767265), transcript variant X1, mRNA	PREDICTED: uncharacterized protein LOC100829690 [Brachypodium distachyon] >KQK05665.1 hypothetical protein BRADI_2g21728 [Brachypodium distachyon]	Vacuolar sorting 38 and autophagy-related subunit 14
CL3306.Contig3_All		XM_010234496.2 PREDICTED: Brachypodium distachyon uncharacterized LOC104582947 (LOC104582947), mRNA	PREDICTED: uncharacterized protein LOC4326517 [Oryza sativa Japonica Group] >BAD87986.1 unknown protein [Oryza sativa Japonica Group] >BAF07269.1 Os01g0940600 [Oryza sativa Japonica Group] >EAY77170.1 hypothetical protein OsI_05140 [Oryza sativa Indica Group] >BAG92045.1 unnamed protein product [Oryza sativa Japonica Group] >BAS76150.1 Os01g0940600 [Oryza sativa Japonica Group]	Prokaryotic E2 family A		GO:0016021//integral component of membrane;GO:0010190//cytochrome b6f complex assembly;GO:0042651//thylakoid membrane
CL14559.Contig2_All		NR_145329.1 Zea mays uncharacterized LOC100381526 (LOC100381526), long non-coding RNA	hypothetical protein PAHAL_C04937 [Panicum hallii]			GO:0016021//integral component of membrane
CL14080.Contig2_All	K02184//formin 2	XR_001407461.1 PREDICTED: Brachypodium distachyon uncharacterized LOC100843716 (LOC100843716), transcript variant X2, misc_RNA	hypothetical protein BU14_0200s0040 [Porphyra umbilicalis]	Predicted membrane protein (DUF2207)	Formin-like protein 7 OS=Arabidopsis thaliana GN=FH7 PE=2 SV=1
CL83.Contig7_All	K03264//translation initiation factor 6+ko03008//Ribosome biogenesis in eukaryotes	XM_020309718.1 PREDICTED: Aegilops tauschii subsp. tauschii eukaryotic translation initiation factor 6-2 (LOC109750764), transcript variant X2, mRNA	eukaryotic translation initiation factor 6-2 [Aegilops tauschii subsp. tauschii] >XP_020165307.1 eukaryotic translation initiation factor 6-2 [Aegilops tauschii subsp. tauschii]	eIF-6 family	Eukaryotic translation initiation factor 6-2 OS=Arabidopsis thaliana GN=EIF6-2 PE=2 SV=1	GO:0043022//ribosome binding;GO:0000054//ribosomal subunit export from nucleus;GO:0030687//preribosome, large subunit precursor;GO:0005737//cytoplasm;GO:0000470//maturation of LSU-rRNA;GO:0003743//translation initiation factor activity;GO:0000460//maturation of 5.8S rRNA;GO:0005730//nucleolus;GO:1902626//assembly of large subunit precursor of preribosome;GO:0005829//cytosol;GO:0043023//ribosomal …
Unigene29385_All	K13343//peroxin-14+ko04146//Peroxisome;K12598//ATP-dependent RNA helicase DOB1 [EC:3.6.4.13]+ko03018//RNA degradation;K17592//sacsin	XM_010236831.2 PREDICTED: Brachypodium distachyon uncharacterized LOC100825935 (LOC100825935), transcript variant X2, mRNA	hypothetical protein BRADI_3g36120 [Brachypodium distachyon]			GO:0009507//chloroplast
CL6558.Contig6_All	K16221//transcription factor TCP21 (protein CCA1 HIKING EXPEDITION)+ko04712//Circadian rhythm - plant	XM_003564917.3 PREDICTED: Brachypodium distachyon transcription factor TCP20 (LOC100827968), mRNA	PREDICTED: transcription factor TCP20 [Brachypodium distachyon] >KQK11288.1 hypothetical protein BRADI_2g59240 [Brachypodium distachyon]	TCP family transcription factor	Transcription factor TCP8 OS=Arabidopsis thaliana GN=TCP8 PE=1 SV=1	GO:0003677//DNA binding;GO:0005634//nucleus;GO:0006355//regulation of transcription, DNA-templated;GO:0006351//transcription, DNA-templated
Unigene1160_All	K05605//3-hydroxyisobutyryl-CoA hydrolase [EC:3.1.2.4]+ko00410//beta-Alanine metabolism+ko00280//Valine, leucine and isoleucine degradation+ko00640//Propanoate metabolism+ko01100//Metabolic pathways+ko01200//Carbon metabolism	FP099083.1 Phyllostachys edulis cDNA clone: bphylf035c19, full insert sequence	3-hydroxyisobutyryl-CoA hydrolase-like protein 3, mitochondrial isoform X1 [Aegilops tauschii subsp. tauschii]	Enoyl-CoA hydratase/isomerase	3-hydroxyisobutyryl-CoA hydrolase-like protein 3, mitochondrial OS=Arabidopsis thaliana GN=At4g13360 PE=1 SV=2	GO:0003860//3-hydroxyisobutyryl-CoA hydrolase activity
CL13624.Contig6_All		XR_001406633.1 PREDICTED: Brachypodium distachyon uncharacterized LOC104583586 (LOC104583586), transcript variant X4, ncRNA			Formin-like protein 14 OS=Arabidopsis thaliana GN=FH14 PE=3 SV=3
CL3007.Contig1_All	K16278//E3 ubiquitin-protein ligase HOS1 [EC:2.3.2.27]	XM_010232011.2 PREDICTED: Brachypodium distachyon E3 ubiquitin-protein ligase HOS1 (LOC100836812), transcript variant X2, mRNA	PREDICTED: E3 ubiquitin-protein ligase HOS1 isoform X2 [Brachypodium distachyon]	Nuclear pore complex assembly	E3 ubiquitin-protein ligase HOS1 OS=Arabidopsis thaliana GN=HOS1 PE=1 SV=1	GO:0045892//negative regulation of transcription, DNA-templated;GO:0005634//nucleus;GO:0009409//response to cold;GO:0005737//cytoplasm;GO:0010228//vegetative to reproductive phase transition of meristem;GO:0004842//ubiquitin-protein transferase activity
CL337.Contig8_All	K00558//DNA (cytosine-5)-methyltransferase 1 [EC:2.1.1.37]+ko01100//Metabolic pathways+ko00270//Cysteine and methionine metabolism	XM_020338847.1 PREDICTED: Aegilops tauschii subsp. tauschii DNA (cytosine-5)-methyltransferase CMT2-like (LOC109780257), transcript variant X1, mRNA	DNA (cytosine-5)-methyltransferase CMT2-like [Aegilops tauschii subsp. tauschii]	C-5 cytosine-specific DNA methylase	DNA (cytosine-5)-methyltransferase CMT2 OS=Oryza sativa subsp. japonica GN=CMT2 PE=2 SV=2	GO:0005634//nucleus;GO:0008168//methyltransferase activity;GO:0003682//chromatin binding
Unigene61533_All	K02151//V-type H+-transporting ATPase subunit F+ko04145//Phagosome+ko01100//Metabolic pathways+ko00190//Oxidative phosphorylation	FP097579.1 Phyllostachys edulis cDNA clone: bphyst015d06, full insert sequence	V-type proton ATPase subunit F [Sorghum bicolor] >EER97697.1 hypothetical protein SORBI_3002G410700 [Sorghum bicolor]	ATP synthase (F/14-kDa) subunit	V-type proton ATPase subunit F OS=Arabidopsis thaliana GN=VHA-F PE=2 SV=1	GO:0016020//membrane;GO:0015991//ATP hydrolysis coupled proton transport;GO:0042625//ATPase coupled ion transmembrane transporter activity;GO:0033180//proton-transporting V-type ATPase, V1 domain;GO:0046961//proton-transporting ATPase activity, rotational mechanism
Unigene53859_All	K21952//CASK-interacting protein	XM_003575977.3 PREDICTED: Brachypodium distachyon F-box protein At3g12350 (LOC100828016), mRNA	predicted protein [Hordeum vulgare subsp. vulgare]	Transcription initiation factor TFIID component TAF4 family	Vegetative cell wall protein gp1 OS=Chlamydomonas reinhardtii GN=GP1 PE=1 SV=1
CL8785.Contig14_All	K14496//abscisic acid receptor PYR/PYL family+ko04016//MAPK signaling pathway - plant+ko04075//Plant hormone signal transduction	XM_003568689.3 PREDICTED: Brachypodium distachyon abscisic acid receptor PYL8 (LOC100844369), mRNA	ABA receptor 5 [Oryza sativa Indica Group]	Polyketide cyclase / dehydrase and lipid transport	Abscisic acid receptor PYL9 OS=Arabidopsis thaliana GN=PYL9 PE=1 SV=1
CL14719.Contig1_All	K21737//acyl-lipid Delta6-acetylenase / acyl-lipid (9-3)-desaturase [EC:1.14.19.38 1.14.19.47]	XM_003577953.3 PREDICTED: Brachypodium distachyon delta(8)-fatty-acid desaturase 2-like (LOC100826592), mRNA	delta8-sphingolipid desaturase [Brachypodium distachyon]	Fatty acid desaturase	Delta(8)-fatty-acid desaturase 2 OS=Arabidopsis thaliana GN=SLD2 PE=1 SV=1	GO:0016021//integral component of membrane;GO:0006629//lipid metabolic process;GO:0016491//oxidoreductase activity
CL3599.Contig9_All	K00030//isocitrate dehydrogenase (NAD+) [EC:1.1.1.41]+ko00020//Citrate cycle (TCA cycle)+ko01230//Biosynthesis of amino acids+ko01100//Metabolic pathways+ko01110//Biosynthesis of secondary metabolites+ko01210//2-Oxocarboxylic acid metabolism+ko01200//Carbon metabolism	FP096761.1 Phyllostachys edulis cDNA clone: bphylf047l09, full insert sequence	predicted protein [Hordeum vulgare subsp. vulgare]	Isocitrate/isopropylmalate dehydrogenase	3-isopropylmalate dehydrogenase, chloroplastic OS=Solanum tuberosum PE=2 SV=1	GO:0006099//tricarboxylic acid cycle;GO:0000287//magnesium ion binding;GO:0004449//isocitrate dehydrogenase (NAD+) activity;GO:0051287//NAD binding;GO:0005739//mitochondrion
CL8810.Contig4_All	K02996//small subunit ribosomal protein S9+ko03010//Ribosome	FP098933.1 Phyllostachys edulis cDNA clone: bphylf045h17, full insert sequence	hypothetical protein BRADI_1g19110 [Brachypodium distachyon]	Ribosomal protein S9/S16	30S ribosomal protein S9, chloroplastic OS=Gracilaria tenuistipitata var. liui GN=rps9 PE=3 SV=1	GO:0000462//maturation of SSU-rRNA from tricistronic rRNA transcript (SSU-rRNA, 5.8S rRNA, LSU-rRNA);GO:0003723//RNA binding;GO:0006412//translation;GO:0003735//structural constituent of ribosome;GO:0015935//small ribosomal subunit
CL14426.Contig2_All	K13203//zinc finger RNA-binding protein		hypothetical protein BRADI_4g45110 [Brachypodium distachyon]	Zinc-finger of C2H2 type	RNA-directed DNA polymerase homolog OS=Oenothera berteroana PE=4 SV=1	GO:0003723//RNA binding;GO:0008270//zinc ion binding
CL1043.Contig24_All	K18798//peroxisome-assembly ATPase [EC:3.6.4.7]	XM_014901557.1 PREDICTED: Brachypodium distachyon lactation elevated protein 1-like (LOC100833412), transcript variant X2, mRNA	PREDICTED: lactation elevated protein 1-like [Brachypodium distachyon] >XP_010234525.1 PREDICTED: lactation elevated protein 1-like [Brachypodium distachyon] >XP_010234526.1 PREDICTED: lactation elevated protein 1-like [Brachypodium distachyon] >XP_014757043.1 PREDICTED: lactation elevated protein 1-like [Brachypodium distachyon] >XP_014757044.1 PREDICTED: lactation elevated protein 1-like [Brach…	AFG1-like ATPase		GO:0005524//ATP binding
CL16927.Contig15_All	K12900//FUS-interacting serine-arginine-rich protein 1+ko03040//Spliceosome	FP097186.1 Phyllostachys edulis cDNA clone: bphyst039m24, full insert sequence	hypothetical protein SETIT_036861mg [Setaria italica]	RNA recognition motif. (a.k.a. RRM, RBD, or RNP domain)	Serine/arginine-rich SC35-like splicing factor SCL30A OS=Arabidopsis thaliana GN=SCL30A PE=1 SV=1	GO:0003723//RNA binding
CL8314.Contig7_All	K14291//phosphorylated adapter RNA export protein+ko03013//RNA transport	XM_003566737.3 PREDICTED: Brachypodium distachyon uncharacterized LOC100830007 (LOC100830007), mRNA	uncharacterized protein LOC109774271 [Aegilops tauschii subsp. tauschii]	PHAX RNA-binding domain
CL1832.Contig10_All		AK359553.1 Hordeum vulgare subsp. vulgare mRNA for predicted protein, complete cds, clone: NIASHv1099A11	PREDICTED: uncharacterized protein LOC100824682 [Brachypodium distachyon] >XP_014755357.1 PREDICTED: uncharacterized protein LOC100824682 [Brachypodium distachyon] >KQK05126.1 hypothetical protein BRADI_2g18170 [Brachypodium distachyon]	Protein of unknown function (DUF1639)
CL16102.Contig1_All	K02350//DNA polymerase zeta [EC:2.7.7.7]+ko01100//Metabolic pathways	XM_020325532.1 PREDICTED: Aegilops tauschii subsp. tauschii zinc finger protein VAR3, chloroplastic (LOC109766748), mRNA	unnamed protein product [Triticum aestivum]	Zn-finger in Ran binding protein and others	Formin-like protein 5 OS=Oryza sativa subsp. japonica GN=FH5 PE=2 SV=2	GO:0046872//metal ion binding;GO:1900871//chloroplast mRNA modification;GO:0009658//chloroplast organization;GO:0009570//chloroplast stroma
CL4558.Contig1_All	K05747//Wiskott-Aldrich syndrome protein+ko04144//Endocytosis;K16628//collagen, type VII, alpha	FP091408.1 Phyllostachys edulis cDNA clone: bphyst013c07, full insert sequence	PREDICTED: cyclin-dependent kinase inhibitor 5-like [Brachypodium distachyon] >KQK23758.1 hypothetical protein BRADI_1g75887 [Brachypodium distachyon]	Cyclin-dependent kinase inhibitor	Cyclin-dependent kinase inhibitor 5 OS=Oryza sativa subsp. japonica GN=KRP5 PE=2 SV=1	GO:0004861//cyclin-dependent protein serine/threonine kinase inhibitor activity;GO:0005634//nucleus;GO:0007050//cell cycle arrest
CL4514.Contig3_All	K17943//pumilio RNA-binding family	XM_020309760.1 PREDICTED: Aegilops tauschii subsp. tauschii pumilio homolog 1-like (LOC109750815), mRNA	PREDICTED: pumilio homolog 1 [Oryza sativa Japonica Group] >BAD87365.1 putative pumilio domain-containing protein PPD1 [Oryza sativa Japonica Group] >BAF07452.1 Os01g0971900 [Oryza sativa Japonica Group] >EEC72253.1 hypothetical protein OsI_05392 [Oryza sativa Indica Group] >EEE56088.1 hypothetical protein OsJ_04928 [Oryza sativa Japonica Group] >BAS76434.1 Os01g0971900 [Oryza sativa Japonica Gro…	Nucleic acid binding protein NABP	Pumilio homolog 3 OS=Arabidopsis thaliana GN=APUM3 PE=1 SV=1	GO:0003723//RNA binding
CL5956.Contig4_All		FP097082.1 Phyllostachys edulis cDNA clone: bphyem002o11, full insert sequence	PREDICTED: uncharacterized protein LOC100821889 [Brachypodium distachyon] >KQK14336.1 hypothetical protein BRADI_1g15520 [Brachypodium distachyon]
CL2306.Contig5_All	K01904//4-coumarate--CoA ligase [EC:6.2.1.12]+ko00130//Ubiquinone and other terpenoid-quinone biosynthesis+ko01100//Metabolic pathways+ko01110//Biosynthesis of secondary metabolites+ko00940//Phenylpropanoid biosynthesis+ko00360//Phenylalanine metabolism	XM_003558739.3 PREDICTED: Brachypodium distachyon 4-coumarate--CoA ligase-like 1 (LOC100845934), mRNA	PREDICTED: 4-coumarate--CoA ligase-like 1 [Brachypodium distachyon] >KQK23604.1 hypothetical protein BRADI_1g74870 [Brachypodium distachyon]	AMP-binding enzyme	4-coumarate--CoA ligase-like 1 OS=Oryza sativa subsp. japonica GN=4CLL1 PE=2 SV=2	GO:0005524//ATP binding;GO:0009695//jasmonic acid biosynthetic process;GO:0004321//fatty-acyl-CoA synthase activity;GO:0005777//peroxisome;GO:0016874//ligase activity
CL12257.Contig6_All	K00311//electron-transferring-flavoprotein dehydrogenase [EC:1.5.5.1]	AK372639.1 Hordeum vulgare subsp. vulgare mRNA for predicted protein, complete cds, clone: NIASHv3007P17	electron transfer flavoprotein-ubiquinone oxidoreductase, mitochondrial isoform X2 [Aegilops tauschii subsp. tauschii]		Electron transfer flavoprotein-ubiquinone oxidoreductase, mitochondrial OS=Oryza sativa subsp. japonica GN=Os10g0516300 PE=3 SV=1
Unigene53451_All	K14638//solute carrier family 15 (peptide/histidine transporter), member 3/4;K19307//25S rRNA (uracil2634-N3)-methyltransferase [EC:2.1.1.313];K00876//uridine kinase [EC:2.7.1.48]+ko01100//Metabolic pathways+ko00240//Pyrimidine metabolism	XM_003567826.3 PREDICTED: Brachypodium distachyon uncharacterized LOC100840916 (LOC100840916), mRNA	PREDICTED: uncharacterized protein LOC100840916 [Brachypodium distachyon] >KQK04832.1 hypothetical protein BRADI_2g16237 [Brachypodium distachyon]	Protein of unknown function (DUF1296)	GBF-interacting protein 1-like OS=Arabidopsis thaliana GN=GIP1L PE=1 SV=1
CL1858.Contig9_All		XM_020298939.1 PREDICTED: Aegilops tauschii subsp. tauschii uncharacterized LOC109739856 (LOC109739856), transcript variant X5, mRNA	uncharacterized protein LOC109739856 [Aegilops tauschii subsp. tauschii] >XP_020154525.1 uncharacterized protein LOC109739856 [Aegilops tauschii subsp. tauschii] >XP_020154526.1 uncharacterized protein LOC109739856 [Aegilops tauschii subsp. tauschii] >XP_020154527.1 uncharacterized protein LOC109739856 [Aegilops tauschii subsp. tauschii] >XP_020154528.1 uncharacterized protein LOC109739856 [Aegil…	BRO1-like domain
Unigene54508_All	K04733//interleukin-1 receptor-associated kinase 4 [EC:2.7.11.1];K01180//endo-1,3(4)-beta-glucanase [EC:3.2.1.6]	XM_003561683.3 PREDICTED: Brachypodium distachyon translation initiation factor IF-2-like (LOC100838657), mRNA	PREDICTED: uncharacterized protein LOC4332525 [Oryza sativa Japonica Group]	Myb/SANT-like DNA-binding domain	Vegetative cell wall protein gp1 OS=Chlamydomonas reinhardtii GN=GP1 PE=1 SV=1
Unigene64229_All		XM_003563512.3 PREDICTED: Brachypodium distachyon uncharacterized LOC100835389 (LOC100835389), mRNA	PREDICTED: uncharacterized protein LOC100835389 [Brachypodium distachyon] >KQK17526.1 hypothetical protein BRADI_1g35060 [Brachypodium distachyon]
CL6147.Contig7_All	K10609//cullin 4+ko03420//Nucleotide excision repair+ko04120//Ubiquitin mediated proteolysis	XM_020323714.1 PREDICTED: Aegilops tauschii subsp. tauschii cullin-4 (LOC109764931), mRNA	predicted protein [Hordeum vulgare subsp. vulgare]	Cullin family	Cullin-4 OS=Arabidopsis thaliana GN=CUL4 PE=1 SV=1	GO:0080008//Cul4-RING E3 ubiquitin ligase complex;GO:0005634//nucleus;GO:0006281//DNA repair;GO:0048825//cotyledon development;GO:0031625//ubiquitin protein ligase binding;GO:0042787//protein ubiquitination involved in ubiquitin-dependent protein catabolic process;GO:0009640//photomorphogenesis;GO:0010182//sugar mediated signaling pathway;GO:0048575//short-day photoperiodism, flowering;GO:0009908…
Unigene26056_All	K03024//DNA-directed RNA polymerase III subunit RPC7+ko00230//Purine metabolism+ko03020//RNA polymerase+ko01100//Metabolic pathways+ko00240//Pyrimidine metabolism	AK332818.1 Triticum aestivum cDNA, clone: WT004_P06, cultivar: Chinese Spring	PREDICTED: glutamic acid-rich protein-like [Brachypodium distachyon] >KQK15285.1 hypothetical protein BRADI_1g21647 [Brachypodium distachyon]	DNA-directed RNA polymerase III subunit Rpc31	Acetyl-coenzyme A carboxylase carboxyl transferase subunit beta, chloroplastic OS=Oenothera elata subsp. hookeri GN=accD PE=3 SV=2	GO:0003899//DNA-directed 5'-3' RNA polymerase activity;GO:0006383//transcription from RNA polymerase III promoter
CL69.Contig8_All	K07198//5'-AMP-activated protein kinase, catalytic alpha subunit [EC:2.7.11.11]	HG670306.1 Triticum aestivum chromosome 3B, genomic scaffold, cultivar Chinese Spring	PREDICTED: CBL-interacting protein kinase 5 [Brachypodium distachyon] >KQK03246.1 hypothetical protein BRADI_2g06550 [Brachypodium distachyon]	Protein kinase domain	CBL-interacting protein kinase 5 OS=Oryza sativa subsp. japonica GN=CIPK5 PE=2 SV=1	GO:0018107//peptidyl-threonine phosphorylation;GO:0018105//peptidyl-serine phosphorylation;GO:0004674//protein serine/threonine kinase activity;GO:0005524//ATP binding;GO:0005829//cytosol;GO:0016021//integral component of membrane;GO:0035556//intracellular signal transduction
CL3701.Contig1_All	K03686//molecular chaperone DnaJ;K09530//DnaJ homolog subfamily C member 10+ko04141//Protein processing in endoplasmic reticulum	XM_020344207.1 PREDICTED: Aegilops tauschii subsp. tauschii chaperone protein dnaJ 10-like (LOC109785616), transcript variant X1, mRNA	PREDICTED: chaperone protein dnaJ 10 [Oryza sativa Japonica Group] >BAD08769.1 DnaJ protein family-like [Oryza sativa Japonica Group] >BAD08872.1 DnaJ protein family-like [Oryza sativa Japonica Group] >BAF24196.1 Os08g0522600 [Oryza sativa Japonica Group] >BAG97212.1 unnamed protein product [Oryza sativa Japonica Group] >EEC83904.1 hypothetical protein OsI_29937 [Oryza sativa Indica Group] >BAT06…	X-domain of DnaJ-containing	Chaperone protein dnaJ 10 OS=Arabidopsis thaliana GN=ATJ10 PE=2 SV=2
CL14946.Contig20_All	K21596//calmodulin-binding transcription activator	XM_014897365.1 PREDICTED: Brachypodium distachyon calmodulin-binding transcription activator 3-like (LOC100839763), transcript variant X2, mRNA	PREDICTED: calmodulin-binding transcription activator 3-like isoform X2 [Brachypodium distachyon]	IPT/TIG domain	Calmodulin-binding transcription activator 2 OS=Arabidopsis thaliana GN=CMTA2 PE=1 SV=1	GO:0003677//DNA binding;GO:0005634//nucleus
Unigene32106_All	K17710//pentatricopeptide repeat domain-containing protein 1;K17964//leucine-rich PPR motif-containing protein, mitochondrial	XM_003573149.3 PREDICTED: Brachypodium distachyon putative pentatricopeptide repeat-containing protein At5g43820 (LOC100831963), transcript variant X1, mRNA	PREDICTED: putative pentatricopeptide repeat-containing protein At5g43820 [Brachypodium distachyon] >XP_010234187.1 PREDICTED: putative pentatricopeptide repeat-containing protein At5g43820 [Brachypodium distachyon] >KQJ94607.1 hypothetical protein BRADI_3g11437 [Brachypodium distachyon]	PPR repeat family	Pentatricopeptide repeat-containing protein At3g22470, mitochondrial OS=Arabidopsis thaliana GN=At3g22470 PE=1 SV=1	GO:0043231//intracellular membrane-bounded organelle;GO:0003723//RNA binding;GO:0009451//RNA modification;GO:0004519//endonuclease activity
CL1570.Contig2_All	K03541//photosystem II 10kDa protein+ko01100//Metabolic pathways+ko00195//Photosynthesis	DQ288243.1 Phyllostachys pubescens PS II 10 kDa protein mRNA, complete cds	PS II 10 kDa protein [Phyllostachys edulis]	Photosystem II 10 kDa polypeptide PsbR	Photosystem II 10 kDa polypeptide, chloroplastic OS=Spinacia oleracea GN=PSBR PE=2 SV=1	GO:0016021//integral component of membrane;GO:0015979//photosynthesis;GO:0009654//photosystem II oxygen evolving complex
CL4016.Contig11_All	K00876//uridine kinase [EC:2.7.1.48]+ko01100//Metabolic pathways+ko00240//Pyrimidine metabolism	XM_003578335.3 PREDICTED: Brachypodium distachyon uridine kinase-like protein 1, chloroplastic (LOC100840869), mRNA	PREDICTED: uridine kinase-like protein 1, chloroplastic [Oryza brachyantha]	Phosphoribulokinase / Uridine kinase family	Uridine kinase-like protein 2, chloroplastic OS=Arabidopsis thaliana GN=UKL2 PE=2 SV=1	GO:0004849//uridine kinase activity;GO:0005524//ATP binding;GO:0044206//UMP salvage;GO:0044211//CTP salvage
CL11890.Contig5_All		XM_020324728.1 PREDICTED: Aegilops tauschii subsp. tauschii uncharacterized LOC109765960 (LOC109765960), transcript variant X3, mRNA	hypothetical protein F775_07570 [Aegilops tauschii]	GDP-fucose protein O-fucosyltransferase
Unigene22290_All		XM_020334654.1 PREDICTED: Aegilops tauschii subsp. tauschii uncharacterized LOC109775951 (LOC109775951), mRNA	hypothetical protein SETIT_027214mg [Setaria italica]
Unigene31699_All	K03006//DNA-directed RNA polymerase II subunit RPB1 [EC:2.7.7.6]+ko00230//Purine metabolism+ko03020//RNA polymerase+ko01100//Metabolic pathways+ko00240//Pyrimidine metabolism;K04733//interleukin-1 receptor-associated kinase 4 [EC:2.7.11.1]		hypothetical protein AXG93_925s1050 [Marchantia polymorpha subsp. ruderalis]		Proline-rich receptor-like protein kinase PERK8 OS=Arabidopsis thaliana GN=PERK8 PE=1 SV=1	GO:0004674//protein serine/threonine kinase activity;GO:0005524//ATP binding;GO:0016021//integral component of membrane
CL17158.Contig15_All	K17917//sorting nexin-1/2+ko04144//Endocytosis	HG975451.1 Solanum pennellii chromosome ch12, complete genome	PREDICTED: sorting nexin 1 [Brachypodium distachyon] >KQK10724.1 hypothetical protein BRADI_2g55760 [Brachypodium distachyon]	Melanoma associated antigen family N terminal
CL9.Contig6_All		XM_020310073.1 PREDICTED: Aegilops tauschii subsp. tauschii uncharacterized LOC109751181 (LOC109751181), mRNA	PREDICTED: uncharacterized protein LOC100845589 [Brachypodium distachyon] >KQK05932.1 hypothetical protein BRADI_2g23430 [Brachypodium distachyon]	Tetratricopeptide repeat		GO:1901703//protein localization involved in auxin polar transport;GO:0005739//mitochondrion;GO:0010073//meristem maintenance
CL16447.Contig11_All		FP092086.1 Phyllostachys edulis cDNA clone: bphyst020f03, full insert sequence	uncharacterized protein LOC109761580 [Aegilops tauschii subsp. tauschii]
CL10120.Contig3_All	K10738//DNA helicase MCM9 [EC:3.6.4.12]	XM_003570550.3 PREDICTED: Brachypodium distachyon LMBR1 domain-containing protein 2 homolog A-like (LOC100843056), mRNA	Os02g0758100, partial [Oryza sativa Japonica Group]	LMBR1-like membrane protein	Sulfated surface glycoprotein 185 OS=Volvox carteri PE=1 SV=1	GO:0016021//integral component of membrane
CL3969.Contig6_All	K22733//magnesium transporter	XM_015765601.1 PREDICTED: Oryza sativa Japonica Group pentatricopeptide repeat-containing protein At3g14730 (LOC9266068), transcript variant X3, mRNA	PREDICTED: pentatricopeptide repeat-containing protein At3g14730 [Oryza sativa Japonica Group] >XP_015621086.1 PREDICTED: pentatricopeptide repeat-containing protein At3g14730 [Oryza sativa Japonica Group] >XP_015621087.1 PREDICTED: pentatricopeptide repeat-containing protein At3g14730 [Oryza sativa Japonica Group] >BAB62584.1 pentatricopeptide (PPR) repeat-containing protein-like [Oryza sativa J…	PPR repeat family	Pentatricopeptide repeat-containing protein At3g14730 OS=Arabidopsis thaliana GN=PCMP-E31 PE=2 SV=1	GO:0043231//intracellular membrane-bounded organelle;GO:0003723//RNA binding;GO:0009451//RNA modification;GO:0004519//endonuclease activity
CL2616.Contig20_All	K02492//glutamyl-tRNA reductase [EC:1.2.1.70]+ko00860//Porphyrin and chlorophyll metabolism+ko01100//Metabolic pathways+ko01110//Biosynthesis of secondary metabolites	XM_003572969.3 PREDICTED: Brachypodium distachyon glutamyl-tRNA reductase, chloroplastic-like (LOC100843576), mRNA	PREDICTED: glutamyl-tRNA reductase, chloroplastic [Oryza sativa Japonica Group] >P0C587.1 RecName: Full=Glutamyl-tRNA reductase, chloroplastic; Short=GluTR; Flags: Precursor >ABB47844.1 Glutamyl-tRNA reductase, chloroplast precursor, putative, expressed [Oryza sativa Japonica Group] >BAF26905.1 Os10g0502400 [Oryza sativa Japonica Group] >BAT11537.1 Os10g0502400 [Oryza sativa Japonica Group]	Shikimate / quinate 5-dehydrogenase	Glutamyl-tRNA reductase, chloroplastic OS=Oryza sativa subsp. japonica GN=Os10g0502400 PE=2 SV=1	GO:0050661//NADP binding;GO:0008883//glutamyl-tRNA reductase activity;GO:0006782//protoporphyrinogen IX biosynthetic process;GO:0015995//chlorophyll biosynthetic process;GO:0009507//chloroplast
Unigene56709_All	K00924//kinase [EC:2.7.1.-]	XM_010234340.2 PREDICTED: Brachypodium distachyon receptor-like protein kinase HSL1 (LOC100843444), mRNA	PREDICTED: receptor-like protein kinase HSL1 [Brachypodium distachyon] >KQK10873.1 hypothetical protein BRADI_2g56750 [Brachypodium distachyon]	Protein kinase domain	Receptor protein-tyrosine kinase CEPR2 OS=Arabidopsis thaliana GN=CEPR2 PE=1 SV=1	GO:0004674//protein serine/threonine kinase activity;GO:0005524//ATP binding;GO:0016021//integral component of membrane
CL8479.Contig4_All	K17908//autophagy-related protein 18+ko04136//Autophagy - other	XR_001407234.1 PREDICTED: Brachypodium distachyon autophagy-related protein 18b (LOC100823376), transcript variant X2, misc_RNA	PREDICTED: autophagy-related protein 18b [Brachypodium distachyon] >KQK01096.1 hypothetical protein BRADI_3g53850 [Brachypodium distachyon] >KQK01097.1 hypothetical protein BRADI_3g53850 [Brachypodium distachyon] >KQK01098.1 hypothetical protein BRADI_3g53850 [Brachypodium distachyon]	WD domain, G-beta repeat	Autophagy-related protein 18b OS=Arabidopsis thaliana GN=ATG18B PE=2 SV=2	GO:0019898//extrinsic component of membrane;GO:0032266//phosphatidylinositol-3-phosphate binding;GO:0000422//autophagy of mitochondrion;GO:0080025//phosphatidylinositol-3,5-bisphosphate binding;GO:0006497//protein lipidation;GO:0034497//protein localization to phagophore assembly site;GO:0005829//cytosol;GO:0044804//autophagy of nucleus;GO:0034045//phagophore assembly site membrane
CL14506.Contig15_All	K11883//RNA-binding protein NOB1+ko03008//Ribosome biogenesis in eukaryotes	XM_003570756.3 PREDICTED: Brachypodium distachyon RNA-binding protein NOB1 (LOC100834504), mRNA	RNA-binding protein NOB1 [Aegilops tauschii subsp. tauschii]	PIN domain of ribonuclease
CL4655.Contig4_All	K08869//aarF domain-containing kinase;K17613//calcineurin-binding protein cabin-1;K15397//3-ketoacyl-CoA synthase [EC:2.3.1.199]+ko01110//Biosynthesis of secondary metabolites+ko00062//Fatty acid elongation;K13172//serine/arginine repetitive matrix protein 2	XM_003568401.3 PREDICTED: Brachypodium distachyon transcription factor DIVARICATA (LOC100833882), mRNA	hypothetical protein PAHAL_E03927 [Panicum hallii]	Myb-like DNA-binding domain	Transcription factor MYB1R1 OS=Solanum tuberosum PE=2 SV=1	GO:0003677//DNA binding;GO:0005634//nucleus;GO:0006355//regulation of transcription, DNA-templated;GO:0006351//transcription, DNA-templated
CL17162.Contig15_All	K07300//Ca2+:H+ antiporter	XM_003580662.3 PREDICTED: Brachypodium distachyon vacuolar cation/proton exchanger 3 (LOC100839780), transcript variant X1, mRNA	PREDICTED: vacuolar cation/proton exchanger 3 [Oryza sativa Japonica Group] >Q6K1C4.2 RecName: Full=Vacuolar cation/proton exchanger 3; AltName: Full=Ca(2+)/H(+) exchanger 3; AltName: Full=OsCAX3 >CAE03552.1 OSJNBa0060D06.18 [Oryza sativa Japonica Group] >BAD83663.1 cation/proton exchanger 3 [Oryza sativa Japonica Group] >BAF16019.1 Os04g0653200 [Oryza sativa Japonica Group] >EAZ32238.1 hypotheti…	Sodium/calcium exchanger protein	Vacuolar cation/proton exchanger 3 OS=Oryza sativa subsp. japonica GN=CAX3 PE=2 SV=2	GO:0015369//calcium:proton antiporter activity;GO:0009705//plant-type vacuole membrane;GO:0016021//integral component of membrane
CL2601.Contig10_All	K20168//TBC1 domain family member 15	XM_003570164.3 PREDICTED: Brachypodium distachyon TBC1 domain family member 15 (LOC100828896), mRNA	PREDICTED: TBC1 domain family member 15 [Brachypodium distachyon] >KQK00976.1 hypothetical protein BRADI_3g53040 [Brachypodium distachyon]	Rab-GTPase-TBC domain		GO:0090630//activation of GTPase activity;GO:0005622//intracellular;GO:0012505//endomembrane system;GO:0006886//intracellular protein transport;GO:0005829//cytosol;GO:0031338//regulation of vesicle fusion;GO:0016021//integral component of membrane;GO:0017137//Rab GTPase binding;GO:0005096//GTPase activator activity
CL11651.Contig4_All	K04730//interleukin-1 receptor-associated kinase 1 [EC:2.7.11.1]	XM_003572363.3 PREDICTED: Brachypodium distachyon uncharacterized LOC100825318 (LOC100825318), mRNA	PREDICTED: proline-rich receptor-like protein kinase PERK1 [Musa acuminata subsp. malaccensis]
CL7031.Contig4_All	K03028//26S proteasome regulatory subunit N1+ko03050//Proteasome;K13422//transcription factor MYC2+ko04016//MAPK signaling pathway - plant+ko04075//Plant hormone signal transduction;K11838//ubiquitin carboxyl-terminal hydrolase 7 [EC:3.4.19.12]	XM_003565499.3 PREDICTED: Brachypodium distachyon protein NLP3 (LOC100844863), mRNA	protein NLP3-like [Aegilops tauschii subsp. tauschii]	RWP-RK domain	Protein NLP3 OS=Oryza sativa subsp. japonica GN=NLP3 PE=3 SV=1	GO:0003677//DNA binding;GO:0005634//nucleus;GO:0006355//regulation of transcription, DNA-templated;GO:0006351//transcription, DNA-templated
CL16340.Contig22_All	K10268//F-box and leucine-rich repeat protein 2/20	XM_020299528.1 PREDICTED: Aegilops tauschii subsp. tauschii F-box/LRR-repeat protein 3 (LOC109740468), mRNA	PREDICTED: F-box/LRR-repeat protein 3 [Brachypodium distachyon] >KQJ86395.1 hypothetical protein BRADI_4g05157 [Brachypodium distachyon]	Leucine Rich repeat	F-box/LRR-repeat protein 3 OS=Arabidopsis thaliana GN=FBL3 PE=2 SV=1
CL7500.Contig1_All	K13171//serine/arginine repetitive matrix protein 1+ko03015//mRNA surveillance pathway+ko03013//RNA transport	AK440337.1 Brachypodium distachyon mRNA, clone: PL016C01-A-104_O07	PREDICTED: uncharacterized protein LOC100838380 [Brachypodium distachyon] >KQK09274.1 hypothetical protein BRADI_2g47103 [Brachypodium distachyon]		Serine/arginine-rich splicing factor SR45 OS=Arabidopsis thaliana GN=SR45 PE=1 SV=1
Unigene37967_All	K00521//ferric-chelate reductase [EC:1.16.1.7];K06889//uncharacterized protein;K11446//histone demethylase JARID1 [EC:1.14.11.-]	FP093042.1 Phyllostachys edulis cDNA clone: bphylf027k17, full insert sequence	PREDICTED: PHD finger protein ALFIN-LIKE 8 [Brachypodium distachyon] >KQJ88767.1 hypothetical protein BRADI_4g21040 [Brachypodium distachyon]	Alfin	PHD finger protein ALFIN-LIKE 8 OS=Oryza sativa subsp. japonica GN=Os11g0244800 PE=2 SV=1	GO:0042393//histone binding;GO:0046872//metal ion binding;GO:0005634//nucleus;GO:0006355//regulation of transcription, DNA-templated;GO:0016569//covalent chromatin modification;GO:0006351//transcription, DNA-templated
CL11029.Contig2_All	K21843//tetratricopeptide repeat protein 7	AC231519.1 Oryza minuta clone OM__Ba0016N16, complete sequence	Tetratricopeptide repeat protein 7A [Triticum urartu]	Tetratricopeptide repeat	Protein NPGR1 OS=Arabidopsis thaliana GN=NPGR1 PE=1 SV=1	GO:0005886//plasma membrane
CL5547.Contig1_All	K13104//zinc finger protein 830	XM_003568148.3 PREDICTED: Brachypodium distachyon zinc finger protein 830 (LOC100834105), mRNA	PREDICTED: zinc finger protein 830 [Brachypodium distachyon] >KQK05621.1 hypothetical protein BRADI_2g21210 [Brachypodium distachyon]	Zinc-finger of C2H2 type		GO:0045892//negative regulation of transcription, DNA-templated;GO:1903427//negative regulation of reactive oxygen species biosynthetic process;GO:0000278//mitotic cell cycle;GO:0005634//nucleus;GO:0010030//positive regulation of seed germination;GO:0005829//cytosol;GO:0009737//response to abscisic acid
CL4721.Contig3_All
CL6897.Contig3_All	K21806//protein N-lysine methyltransferase METTL21D [EC:2.1.1.-]	AP014961.1 Oryza sativa Japonica Group DNA, chromosome 5, cultivar: Nipponbare, complete sequence	PREDICTED: protein N-lysine methyltransferase METTL21A [Oryza sativa Japonica Group] >XP_015639724.1 PREDICTED: protein N-lysine methyltransferase METTL21A [Oryza sativa Japonica Group] >AAT77398.1 unknown protein [Oryza sativa Japonica Group] >BAF18244.1 Os05g0564100 [Oryza sativa Japonica Group] >EAY99032.1 hypothetical protein OsI_20990 [Oryza sativa Indica Group] >BAG99273.1 unnamed protein p…	Lysine methyltransferase	Pectinesterase inhibitor 10 OS=Arabidopsis thaliana GN=PMEI10 PE=2 SV=1
Unigene86689_All	K07198//5'-AMP-activated protein kinase, catalytic alpha subunit [EC:2.7.11.11]	XM_003557984.3 PREDICTED: Brachypodium distachyon CBL-interacting protein kinase 31 (LOC100845430), mRNA	PREDICTED: CBL-interacting protein kinase 31 [Brachypodium distachyon] >KQK21928.1 hypothetical protein BRADI_1g64010 [Brachypodium distachyon]		CBL-interacting protein kinase 31 OS=Oryza sativa subsp. japonica GN=CIPK31 PE=1 SV=1	GO:0005634//nucleus;GO:0004674//protein serine/threonine kinase activity;GO:0005524//ATP binding;GO:0006468//protein phosphorylation;GO:0035556//intracellular signal transduction;GO:0005737//cytoplasm
Unigene57223_All	K12872//pre-mRNA-splicing factor RBM22/SLT11+ko03040//Spliceosome	FP095017.1 Phyllostachys edulis cDNA clone: bphylf030b16, full insert sequence	PREDICTED: zinc finger CCCH domain-containing protein 40 [Brachypodium distachyon] >KQK19411.1 hypothetical protein BRADI_1g48140 [Brachypodium distachyon]	RNA recognition motif. (a.k.a. RRM, RBD, or RNP domain)	Zinc finger CCCH domain-containing protein 40 OS=Oryza sativa subsp. japonica GN=Os06g0170500 PE=2 SV=1	GO:0071007//U2-type catalytic step 2 spliceosome;GO:0003723//RNA binding;GO:0003677//DNA binding;GO:0071006//U2-type catalytic step 1 spliceosome;GO:0000974//Prp19 complex;GO:0017070//U6 snRNA binding;GO:0046872//metal ion binding;GO:0036002//pre-mRNA binding;GO:0000387//spliceosomal snRNP assembly
CL8407.Contig1_All	K02350//DNA polymerase zeta [EC:2.7.7.7]+ko01100//Metabolic pathways	XM_020314544.1 PREDICTED: Aegilops tauschii subsp. tauschii uncharacterized LOC109755650 (LOC109755650), mRNA	PREDICTED: uncharacterized protein LOC100846876 [Brachypodium distachyon]	Zn-finger in Ran binding protein and others	Formin-like protein 20 OS=Arabidopsis thaliana GN=FH20 PE=2 SV=3	GO:0046872//metal ion binding;GO:0005634//nucleus;GO:0048046//apoplast;GO:0005739//mitochondrion;GO:0009793//embryo development ending in seed dormancy
CL2616.Contig12_All	K02492//glutamyl-tRNA reductase [EC:1.2.1.70]+ko00860//Porphyrin and chlorophyll metabolism+ko01100//Metabolic pathways+ko01110//Biosynthesis of secondary metabolites	XM_003572969.3 PREDICTED: Brachypodium distachyon glutamyl-tRNA reductase, chloroplastic-like (LOC100843576), mRNA	hypothetical protein OsJ_32069 [Oryza sativa Japonica Group]	Shikimate / quinate 5-dehydrogenase	Glutamyl-tRNA reductase, chloroplastic OS=Oryza sativa subsp. japonica GN=Os10g0502400 PE=2 SV=1	GO:0050661//NADP binding;GO:0008883//glutamyl-tRNA reductase activity;GO:0006782//protoporphyrinogen IX biosynthetic process;GO:0015995//chlorophyll biosynthetic process;GO:0009507//chloroplast
CL822.Contig13_All		XM_014897324.1 PREDICTED: Brachypodium distachyon polyadenylate-binding protein-interacting protein 7-like (LOC100835668), transcript variant X3, mRNA	PREDICTED: polyadenylate-binding protein-interacting protein 7-like isoform X2 [Brachypodium distachyon]	Ataxin-2 C-terminal region	Polyadenylate-binding protein-interacting protein 7 OS=Arabidopsis thaliana GN=CID7 PE=1 SV=1
CL7428.Contig2_All	K16251//DNA-directed RNA polymerase V subunit 1 [EC:2.7.7.6]	XM_015774686.1 PREDICTED: Oryza sativa Japonica Group uncharacterized LOC4331522 (LOC4331522), mRNA	uncharacterized protein LOC109759583 [Aegilops tauschii subsp. tauschii]
CL16268.Contig2_All	K06689//ubiquitin-conjugating enzyme E2 D [EC:2.3.2.23]+ko04141//Protein processing in endoplasmic reticulum+ko04120//Ubiquitin mediated proteolysis	FP097221.1 Phyllostachys edulis cDNA clone: bphyst034c11, full insert sequence	Ubiquitin-conjugating enzyme, E2 [Cynara cardunculus var. scolymus]	Ubiquitin-conjugating enzyme	Ubiquitin-conjugating enzyme E2 5A OS=Oryza sativa subsp. japonica GN=UBC5A PE=2 SV=1
CL5770.Contig3_All	K05863//solute carrier family 25 (mitochondrial adenine nucleotide translocator), member 4/5/6/31	XM_010237593.2 PREDICTED: Brachypodium distachyon ADP,ATP carrier protein, mitochondrial (LOC104581321), mRNA	PREDICTED: ADP,ATP carrier protein 2, mitochondrial [Setaria italica] >KQL31240.1 hypothetical protein SETIT_017474mg [Setaria italica] >KQL31241.1 hypothetical protein SETIT_017474mg [Setaria italica]	Mitochondrial carrier protein	ADP,ATP carrier protein, mitochondrial OS=Oryza sativa subsp. japonica GN=Os02g0718900 PE=2 SV=1	GO:0055085//transmembrane transport;GO:0005471//ATP:ADP antiporter activity;GO:0009409//response to cold;GO:0009651//response to salt stress;GO:0046902//regulation of mitochondrial membrane permeability;GO:0005743//mitochondrial inner membrane;GO:0016021//integral component of membrane;GO:0005215//transporter activity
CL12304.Contig3_All	K09422//transcription factor MYB, plant	AK335666.1 Triticum aestivum cDNA, clone: WT013_H17, cultivar: Chinese Spring	transcription factor MYB25-like [Aegilops tauschii subsp. tauschii]	Myb-like DNA-binding domain	Transcription factor MYB44 OS=Arabidopsis thaliana GN=MYB44 PE=1 SV=1	GO:0003677//DNA binding;GO:0000981//RNA polymerase II transcription factor activity, sequence-specific DNA binding;GO:0005634//nucleus;GO:0030154//cell differentiation;GO:0044212//transcription regulatory region DNA binding;GO:0006357//regulation of transcription from RNA polymerase II promoter;GO:0043565//sequence-specific DNA binding;GO:0001135//transcription factor activity, RNA polymerase II …
CL6689.Contig3_All		XM_006658771.2 PREDICTED: Oryza brachyantha uncharacterized LOC102715323 (LOC102715323), mRNA	PREDICTED: uncharacterized protein LOC4343951 [Oryza sativa Japonica Group] >Q7XI45.1 RecName: Full=Signal peptidase complex-like protein DTM1; AltName: Full=Protein DEFECTIVE TAPETUM AND MEIOCYTES 1; Flags: Precursor >BAC79906.1 unknown protein [Oryza sativa Japonica Group] >BAF22232.1 Os07g0622900 [Oryza sativa Japonica Group] >BAG87241.1 unnamed protein product [Oryza sativa Japonica Group]		Signal peptidase complex-like protein DTM1 OS=Oryza sativa subsp. japonica GN=DTM1 PE=2 SV=1	GO:0009555//pollen development;GO:0008233//peptidase activity;GO:0048658//anther wall tapetum development;GO:0016021//integral component of membrane;GO:0005789//endoplasmic reticulum membrane;GO:0006465//signal peptide processing;GO:0005787//signal peptidase complex
CL14159.Contig3_All			uncharacterized protein LOC109765893 [Aegilops tauschii subsp. tauschii]
Unigene37666_All	K13172//serine/arginine repetitive matrix protein 2;K13171//serine/arginine repetitive matrix protein 1+ko03015//mRNA surveillance pathway+ko03013//RNA transport	XM_020304450.1 PREDICTED: Aegilops tauschii subsp. tauschii uncharacterized LOC109745335 (LOC109745335), mRNA	PREDICTED: uncharacterized protein LOC100830721 [Brachypodium distachyon]	No apical meristem (NAM) protein		GO:0003677//DNA binding;GO:0005634//nucleus;GO:0006355//regulation of transcription, DNA-templated;GO:0006351//transcription, DNA-templated
CL7377.Contig6_All	K12392//AP-1 complex subunit beta-1	XM_010233744.2 PREDICTED: Brachypodium distachyon beta-adaptin-like protein A (LOC100825405), mRNA	PREDICTED: beta-adaptin-like protein A [Brachypodium distachyon] >KQK08816.1 hypothetical protein BRADI_2g44070 [Brachypodium distachyon]	Adaptin N terminal region	Beta-adaptin-like protein A OS=Arabidopsis thaliana GN=BETAA-AD PE=1 SV=1	GO:0006886//intracellular protein transport;GO:0030124//AP-4 adaptor complex;GO:0008565//protein transporter activity;GO:0030131//clathrin adaptor complex;GO:0016192//vesicle-mediated transport
Unigene28320_All	K04733//interleukin-1 receptor-associated kinase 4 [EC:2.7.11.1];K02184//formin 2	AK252382.1 Hordeum vulgare subsp. vulgare cDNA clone: FLbaf154h07, mRNA sequence	proline-rich receptor-like protein kinase PERK2 [Aegilops tauschii subsp. tauschii]	FAM177 family	Pollen-specific leucine-rich repeat extensin-like protein 3 OS=Arabidopsis thaliana GN=PEX3 PE=2 SV=1
Unigene65672_All	K12135//zinc finger protein CONSTANS+ko04712//Circadian rhythm - plant	FP098819.1 Phyllostachys edulis cDNA clone: bphyem115g16, full insert sequence	zinc finger protein CO3-like [Aegilops tauschii subsp. tauschii]	B-box zinc finger	Zinc finger protein CO3 OS=Oryza sativa subsp. japonica GN=CO3 PE=2 SV=1
CL731.Contig3_All		XM_003570136.3 PREDICTED: Brachypodium distachyon uncharacterized LOC100846000 (LOC100846000), mRNA	hypothetical protein TRIUR3_23393 [Triticum urartu]	Protein of unknown function (DUF768)		GO:0016021//integral component of membrane
CL11532.Contig3_All	K10686//ubiquitin-activating enzyme E1 C [EC:6.2.1.45]+ko04120//Ubiquitin mediated proteolysis	AK248589.1 Hordeum vulgare subsp. vulgare cDNA clone: FLbaf108g21, mRNA sequence	NEDD8-activating enzyme E1 catalytic subunit [Aegilops tauschii subsp. tauschii]	ThiF family	NEDD8-activating enzyme E1 catalytic subunit OS=Arabidopsis thaliana GN=ECR1 PE=1 SV=2	GO:0045116//protein neddylation;GO:0019781//NEDD8 activating enzyme activity;GO:0005524//ATP binding;GO:0016881//acid-amino acid ligase activity;GO:0005737//cytoplasm
CL7115.Contig4_All	K10523//speckle-type POZ protein	XM_010242152.2 PREDICTED: Brachypodium distachyon BTB/POZ and MATH domain-containing protein 2-like (LOC100826820), mRNA	PREDICTED: BTB/POZ and MATH domain-containing protein 2-like [Brachypodium distachyon] >KQJ84712.1 hypothetical protein BRADI_5g22400 [Brachypodium distachyon]	BTB/POZ domain	BTB/POZ and MATH domain-containing protein 2 OS=Arabidopsis thaliana GN=BPM2 PE=1 SV=1
Unigene61553_All	K04733//interleukin-1 receptor-associated kinase 4 [EC:2.7.11.1];K02184//formin 2		hypothetical protein TanjilG_20604 [Lupinus angustifolius]		Formin-like protein 5 OS=Oryza sativa subsp. japonica GN=FH5 PE=2 SV=2	GO:0005524//ATP binding;GO:0004672//protein kinase activity;GO:0016021//integral component of membrane
CL5294.Contig1_All			hypothetical protein PAHAL_C03151 [Panicum hallii]		DEAD-box ATP-dependent RNA helicase 29 OS=Oryza sativa subsp. indica GN=OsI_028228 PE=2 SV=2
CL4944.Contig3_All	K19589//release factor glutamine methyltransferase [EC:2.1.1.297]	XM_020293177.1 PREDICTED: Aegilops tauschii subsp. tauschii hemK methyltransferase family member 2 (LOC109733966), mRNA	hemK methyltransferase family member 2 [Aegilops tauschii subsp. tauschii]	Methyltransferase small domain	Proline-rich receptor-like protein kinase PERK8 OS=Arabidopsis thaliana GN=PERK8 PE=1 SV=1	GO:0008757//S-adenosylmethionine-dependent methyltransferase activity;GO:0008276//protein methyltransferase activity;GO:0005737//cytoplasm;GO:0003676//nucleic acid binding
Unigene61039_All		FP096584.1 Phyllostachys edulis cDNA clone: bphylf055j02, full insert sequence	transmembrane protein 205-like [Aegilops tauschii subsp. tauschii] >EMT31562.1 hypothetical protein F775_26736 [Aegilops tauschii]	Domain of unknown function (DUF4149)		GO:0016021//integral component of membrane
Unigene4141_All				Cold shock protein DEAD box A
CL8224.Contig1_All	K21626//cyclin-D1-binding protein 1	XM_003567885.3 PREDICTED: Brachypodium distachyon uncharacterized LOC100833175 (LOC100833175), mRNA	PREDICTED: uncharacterized protein LOC100833175 [Brachypodium distachyon] >KQK04989.1 hypothetical protein BRADI_2g17220 [Brachypodium distachyon]	Grap2 and cyclin-D-interacting		GO:0005634//nucleus;GO:0051726//regulation of cell cycle
CL1176.Contig19_All	K00789//S-adenosylmethionine synthetase [EC:2.5.1.6]+ko01230//Biosynthesis of amino acids+ko01100//Metabolic pathways+ko01110//Biosynthesis of secondary metabolites+ko00270//Cysteine and methionine metabolism	XM_003567519.3 PREDICTED: Brachypodium distachyon S-adenosylmethionine synthase 4 (LOC100824801), mRNA	RecName: Full=S-adenosylmethionine synthase 4; Short=AdoMet synthase 4; AltName: Full=Methionine adenosyltransferase 4; Short=MAT 4 >CAJ01705.1 putative AdoMet synthase 4 [Hordeum vulgare subsp. vulgare]	S-adenosylmethionine synthetase, C-terminal domain	S-adenosylmethionine synthase 2 OS=Catharanthus roseus GN=SAMS2 PE=1 SV=1	GO:0003729//mRNA binding;GO:0005524//ATP binding;GO:0009506//plasmodesma;GO:0009409//response to cold;GO:0006730//one-carbon metabolic process;GO:0006555//methionine metabolic process;GO:0046872//metal ion binding;GO:0005618//cell wall;GO:0005730//nucleolus;GO:0009809//lignin biosynthetic process;GO:0005829//cytosol;GO:0004478//methionine adenosyltransferase activity;GO:0006556//S-adenosylmethion…
CL6579.Contig6_All	K03033//26S proteasome regulatory subunit N3+ko03050//Proteasome	FP096310.1 Phyllostachys edulis cDNA clone: bphyem212k01, full insert sequence	PREDICTED: probable 26S proteasome non-ATPase regulatory subunit 3 [Brachypodium distachyon] >KQJ91265.1 hypothetical protein BRADI_4g36700 [Brachypodium distachyon]	Proteasome regulatory subunit C-terminal	Probable 26S proteasome non-ATPase regulatory subunit 3 OS=Nicotiana tabacum GN=21D7 PE=2 SV=1	GO:0006511//ubiquitin-dependent protein catabolic process;GO:0008541//proteasome regulatory particle, lid subcomplex;GO:0042176//regulation of protein catabolic process;GO:0030234//enzyme regulator activity
CL1725.Contig7_All	K17279//receptor expression-enhancing protein 5/6	XM_020323583.1 PREDICTED: Aegilops tauschii subsp. tauschii HVA22-like protein e (LOC109764803), mRNA	HVA22-like protein e [Aegilops tauschii subsp. tauschii]	TB2/DP1, HVA22 family	Protein HVA22 OS=Hordeum vulgare GN=HVA22 PE=2 SV=1	GO:0016021//integral component of membrane
CL802.Contig5_All	K22804//structural maintenance of chromosomes protein 6;K01188//beta-glucosidase [EC:3.2.1.21]+ko01100//Metabolic pathways+ko00500//Starch and sucrose metabolism+ko01110//Biosynthesis of secondary metabolites+ko00460//Cyanoamino acid metabolism+ko00940//Phenylpropanoid biosynthesis		Os06g0484800 [Oryza sativa Japonica Group]	Reverse transcriptase-like	Uncharacterized mitochondrial protein AtMg01250 OS=Arabidopsis thaliana GN=AtMg01250 PE=4 SV=1
CL15598.Contig5_All	K03232//elongation factor 1-beta	FP093728.1 Phyllostachys edulis cDNA clone: bphyst003a06, full insert sequence	PREDICTED: elongation factor 1-delta 1 [Oryza brachyantha] >XP_015695410.1 PREDICTED: elongation factor 1-delta 1 [Oryza brachyantha]	EF-1 guanine nucleotide exchange domain	Elongation factor 1-delta 1 OS=Oryza sativa subsp. japonica GN=Os07g0614500 PE=2 SV=3	GO:0003746//translation elongation factor activity;GO:0005853//eukaryotic translation elongation factor 1 complex
CL4810.Contig5_All	K09060//plant G-box-binding factor	XM_020344109.1 PREDICTED: Aegilops tauschii subsp. tauschii UV-B-induced protein At3g17800, chloroplastic (LOC109785517), mRNA	PREDICTED: UV-B-induced protein At3g17800, chloroplastic [Brachypodium distachyon] >KQJ84336.1 hypothetical protein BRADI_5g20197 [Brachypodium distachyon]	Protein of unknown function (DUF760)	UV-B-induced protein At3g17800, chloroplastic OS=Arabidopsis thaliana GN=At3g17800 PE=2 SV=1	GO:0009570//chloroplast stroma
CL2468.Contig31_All	K05293//phosphatidylinositol glycan, class U+ko01100//Metabolic pathways+ko00563//Glycosylphosphatidylinositol (GPI)-anchor biosynthesis	XM_003562694.3 PREDICTED: Brachypodium distachyon phosphatidylinositol glycan anchor biosynthesis class U protein (LOC100841308), mRNA	PREDICTED: phosphatidylinositol glycan anchor biosynthesis class U protein [Brachypodium distachyon] >KQK15363.1 hypothetical protein BRADI_1g22170 [Brachypodium distachyon]	GPI transamidase subunit PIG-U		GO:0042765//GPI-anchor transamidase complex;GO:0051301//cell division;GO:0016255//attachment of GPI anchor to protein
CL3130.Contig4_All		AK357047.1 Hordeum vulgare subsp. vulgare mRNA for predicted protein, complete cds, clone: NIASHv1044P13	Xylulose kinase [Triticum urartu]	FGGY family of carbohydrate kinases, C-terminal domain
CL13164.Contig24_All	K03255//protein TIF31;K00430//peroxidase [EC:1.11.1.7]+ko01100//Metabolic pathways+ko01110//Biosynthesis of secondary metabolites+ko00940//Phenylpropanoid biosynthesis	XM_010234572.2 PREDICTED: Brachypodium distachyon telomere-binding protein 1 (LOC100834090), transcript variant X3, mRNA	PREDICTED: telomere-binding protein 1 isoform X2 [Brachypodium distachyon]	Myb-like DNA-binding domain	Telomere-binding protein 1 OS=Oryza sativa subsp. japonica GN=TBP1 PE=1 SV=2	GO:0003691//double-stranded telomeric DNA binding;GO:0003677//DNA binding;GO:0000783//nuclear telomere cap complex;GO:0031627//telomeric loop formation
CL2992.Contig10_All	K13506//glycerol-3-phosphate O-acyltransferase 3/4 [EC:2.3.1.15]+ko01100//Metabolic pathways+ko01110//Biosynthesis of secondary metabolites+ko00564//Glycerophospholipid metabolism+ko00561//Glycerolipid metabolism	XM_020326249.1 PREDICTED: Aegilops tauschii subsp. tauschii glycerol-3-phosphate acyltransferase 3 (LOC109767497), mRNA	PREDICTED: glycerol-3-phosphate acyltransferase 4 [Brachypodium distachyon] >KQK15918.1 hypothetical protein BRADI_1g25790 [Brachypodium distachyon]	YwiC-like protein		GO:0005783//endoplasmic reticulum;GO:0008152//metabolic process;GO:0010344//seed oilbody biogenesis;GO:0016746//transferase activity, transferring acyl groups;GO:0043621//protein self-association;GO:0010152//pollen maturation;GO:0019915//lipid storage;GO:0004366//glycerol-3-phosphate O-acyltransferase activity;GO:0006072//glycerol-3-phosphate metabolic process;GO:0016021//integral component of me…
CL15478.Contig2_All	K21248//vacuole membrane protein 1	XM_020334466.1 PREDICTED: Aegilops tauschii subsp. tauschii vacuole membrane protein KMS1-like (LOC109775768), mRNA	PREDICTED: vacuole membrane protein KMS1 [Brachypodium distachyon] >KQK10051.1 hypothetical protein BRADI_2g51700 [Brachypodium distachyon]	SNARE associated Golgi protein	Vacuole membrane protein KMS1 OS=Arabidopsis thaliana GN=KMS1 PE=1 SV=1	GO:0016020//membrane;GO:0005783//endoplasmic reticulum;GO:0000407//phagophore assembly site;GO:0016021//integral component of membrane;GO:0007030//Golgi organization;GO:0006887//exocytosis;GO:0007029//endoplasmic reticulum organization
CL7304.Contig5_All	K14566//U3 small nucleolar RNA-associated protein 24+ko03008//Ribosome biogenesis in eukaryotes;K03686//molecular chaperone DnaJ;K09510//DnaJ homolog subfamily B member 4	XM_010232628.2 PREDICTED: Brachypodium distachyon chaperone protein dnaJ 15 (LOC100831840), transcript variant X2, mRNA	PREDICTED: chaperone protein dnaJ 15 [Brachypodium distachyon] >XP_010230930.1 PREDICTED: chaperone protein dnaJ 15 [Brachypodium distachyon] >KQK04498.1 hypothetical protein BRADI_2g13810 [Brachypodium distachyon] >KQK04499.1 hypothetical protein BRADI_2g13810 [Brachypodium distachyon]	Intra-flagellar transport protein 57	Chaperone protein dnaJ 15 OS=Arabidopsis thaliana GN=ATJ15 PE=1 SV=1
Unigene28013_All	K14317//nuclear pore complex protein Nup214+ko03013//RNA transport	XM_003563604.3 PREDICTED: Brachypodium distachyon uncharacterized LOC100837239 (LOC100837239), transcript variant X1, mRNA	PREDICTED: uncharacterized protein LOC100837239 isoform X2 [Brachypodium distachyon] >KQK17743.1 hypothetical protein BRADI_1g36467 [Brachypodium distachyon]	Potassium channel Kv1.4 tandem inactivation domain
CL225.Contig31_All	K00876//uridine kinase [EC:2.7.1.48]+ko01100//Metabolic pathways+ko00240//Pyrimidine metabolism;K15083//DNA repair protein RAD16	XM_010230208.2 PREDICTED: Brachypodium distachyon uncharacterized LOC100821170 (LOC100821170), transcript variant X1, mRNA	PREDICTED: uncharacterized protein LOC100821170 isoform X1 [Brachypodium distachyon] >KQK21307.1 hypothetical protein BRADI_1g60080 [Brachypodium distachyon]	Lysylphosphatidylglycerol synthase TM region	GBF-interacting protein 1-like OS=Arabidopsis thaliana GN=GIP1L PE=1 SV=1
CL13106.Contig62_All	K09775//uncharacterized protein	AK102777.1 Oryza sativa Japonica Group cDNA clone:J033107I16, full insert sequence	PREDICTED: putative polyketide hydroxylase isoform X1 [Brachypodium distachyon] >KQK11062.1 hypothetical protein BRADI_2g57867 [Brachypodium distachyon]	Replication-relaxation		GO:0071949//FAD binding
Unigene50610_All	K04683//transcription factor Dp-1	XM_010230895.2 PREDICTED: Brachypodium distachyon transcription factor-like protein DPB (LOC100821858), transcript variant X1, mRNA	hypothetical protein PAHAL_I00443 [Panicum hallii]	E2F/DP family winged-helix DNA-binding domain	Transcription factor-like protein DPB OS=Arabidopsis thaliana GN=DPB PE=1 SV=1	GO:0003677//DNA binding;GO:0005634//nucleus;GO:0005667//transcription factor complex;GO:0006351//transcription, DNA-templated;GO:0007049//cell cycle;GO:0003700//DNA binding transcription factor activity
CL5491.Contig6_All		XM_010230598.2 PREDICTED: Brachypodium distachyon protein OBERON 3 (LOC100827614), mRNA	hypothetical protein F775_27653 [Aegilops tauschii]	Coiled-coil region of Oberon	Protein OBERON 3 OS=Arabidopsis thaliana GN=OBE3 PE=1 SV=1
CL7792.Contig2_All	K22071//ferredoxin-2, mitochondrial	XM_003578389.3 PREDICTED: Brachypodium distachyon rhodocoxin (LOC100830876), mRNA	PREDICTED: putidaredoxin [Setaria italica]	Protein of unknown function (DUF1179)	Sulfated surface glycoprotein 185 OS=Volvox carteri PE=1 SV=1	GO:0009055//electron transfer activity;GO:0009735//response to cytokinin;GO:0005739//mitochondrion;GO:0051536//iron-sulfur cluster binding;GO:0009507//chloroplast
CL15543.Contig12_All	K14845//RAT1-interacting protein	XM_003568484.3 PREDICTED: Brachypodium distachyon decapping nuclease DXO homolog, chloroplastic (LOC100833686), mRNA	PREDICTED: decapping nuclease DXO homolog, chloroplastic [Brachypodium distachyon] >KQK06476.1 hypothetical protein BRADI_2g26530 [Brachypodium distachyon]		Decapping nuclease DXO homolog, chloroplastic OS=Arabidopsis thaliana GN=At4g17620 PE=1 SV=1	GO:0005829//cytosol
CL1238.Contig12_All	K12891//splicing factor, arginine/serine-rich 2+ko03040//Spliceosome	FP097355.1 Phyllostachys edulis cDNA clone: bphylf050a11, full insert sequence	PREDICTED: serine/arginine-rich splicing factor SC35-like [Setaria italica] >XP_004984168.1 PREDICTED: serine/arginine-rich splicing factor SC35-like [Setaria italica] >KQK90601.1 hypothetical protein SETIT_037445mg [Setaria italica] >KQK90602.1 hypothetical protein SETIT_037445mg [Setaria italica]	RNA recognition motif. (a.k.a. RRM, RBD, or RNP domain)	Serine/arginine-rich splicing factor SC35 OS=Arabidopsis thaliana GN=SC35 PE=1 SV=1	GO:0003723//RNA binding
CL6035.Contig7_All		XM_020299627.1 PREDICTED: Aegilops tauschii subsp. tauschii thylakoid lumenal protein TL20.3, chloroplastic (LOC109740572), mRNA	Thylakoid lumenal protein TL20.3, chloroplastic [Dichanthelium oligosanthes]	Pentapeptide repeats (8 copies)	Thylakoid lumenal protein TL20.3, chloroplastic OS=Arabidopsis thaliana GN=TL20.3 PE=1 SV=1
CL7858.Contig2_All	K15032//mTERF domain-containing protein, mitochondrial	XM_003557823.3 PREDICTED: Brachypodium distachyon uncharacterized LOC100822472 (LOC100822472), mRNA	PREDICTED: uncharacterized protein LOC100822472 [Brachypodium distachyon] >KQK21596.1 hypothetical protein BRADI_1g61810 [Brachypodium distachyon]	mTERF	Transcription termination factor MTEF1, chloroplastic OS=Arabidopsis thaliana GN=MTERF1 PE=2 SV=2	GO:0032502//developmental process;GO:0006355//regulation of transcription, DNA-templated;GO:0009658//chloroplast organization;GO:0003690//double-stranded DNA binding;GO:0008380//RNA splicing;GO:0009507//chloroplast;GO:0019843//rRNA binding;GO:0003727//single-stranded RNA binding;GO:0042255//ribosome assembly
Unigene33176_All				Ribosomal L40e family
CL3782.Contig1_All	K14306//nuclear pore complex protein Nup62+ko03013//RNA transport	XM_020302223.1 PREDICTED: Aegilops tauschii subsp. tauschii uncharacterized LOC109743145 (LOC109743145), transcript variant X2, mRNA	Chromatin structure-remodeling complex subunit snf21 [Aegilops tauschii]	Peptidyl-tRNA hydrolase PTH2	Nuclear pore complex protein NUP1 OS=Arabidopsis thaliana GN=NUP1 PE=1 SV=1	GO:0042393//histone binding;GO:0005524//ATP binding
CL6766.Contig10_All	K01738//cysteine synthase A [EC:2.5.1.47]+ko00920//Sulfur metabolism+ko01230//Biosynthesis of amino acids+ko01100//Metabolic pathways+ko01110//Biosynthesis of secondary metabolites+ko00270//Cysteine and methionine metabolism+ko01200//Carbon metabolism	XM_020318655.1 PREDICTED: Aegilops tauschii subsp. tauschii cysteine synthase 2 (LOC109759814), mRNA	PREDICTED: cysteine synthase 2 isoform X2 [Brachypodium distachyon] >KQK22877.1 hypothetical protein BRADI_1g69840 [Brachypodium distachyon]	Pyridoxal-phosphate dependent enzyme	Bifunctional L-3-cyanoalanine synthase/cysteine synthase, mitochondrial OS=Spinacia oleracea GN=CYSC PE=1 SV=1	GO:0006535//cysteine biosynthetic process from serine;GO:0016021//integral component of membrane;GO:0030170//pyridoxal phosphate binding;GO:0005737//cytoplasm
Unigene10942_All	K09422//transcription factor MYB, plant	AK250773.1 Hordeum vulgare subsp. vulgare cDNA clone: FLbaf86c09, mRNA sequence	PREDICTED: myb-related protein MYBAS2-like [Brachypodium distachyon] >KQJ86222.1 hypothetical protein BRADI_4g04050 [Brachypodium distachyon]	Myb-like DNA-binding domain	Myb-related protein MYBAS2 OS=Oryza sativa subsp. japonica GN=MYBAS2 PE=2 SV=1	GO:0006357//regulation of transcription from RNA polymerase II promoter;GO:0000981//RNA polymerase II transcription factor activity, sequence-specific DNA binding;GO:0005634//nucleus;GO:0030154//cell differentiation;GO:0043565//sequence-specific DNA binding;GO:0006351//transcription, DNA-templated;GO:0044212//transcription regulatory region DNA binding;GO:0001135//transcription factor activity, R…
CL17068.Contig8_All	K21952//CASK-interacting protein	FP092395.1 Phyllostachys edulis cDNA clone: bphylf024g11, full insert sequence	PREDICTED: uncharacterized protein LOC101773394 [Setaria italica]	Protein of unknown function (DUF793)	Proline-rich receptor-like protein kinase PERK8 OS=Arabidopsis thaliana GN=PERK8 PE=1 SV=1
CL10780.Contig6_All	K21797//phosphatidylinositol 4-phosphatase [EC:3.1.3.-]+ko01100//Metabolic pathways+ko04070//Phosphatidylinositol signaling system+ko00562//Inositol phosphate metabolism	XM_010233172.2 PREDICTED: Brachypodium distachyon probable phosphoinositide phosphatase SAC9 (LOC100845478), transcript variant X1, mRNA	PREDICTED: probable phosphoinositide phosphatase SAC9 [Brachypodium distachyon] >XP_010231474.1 PREDICTED: probable phosphoinositide phosphatase SAC9 [Brachypodium distachyon] >KQK06602.1 hypothetical protein BRADI_2g27230 [Brachypodium distachyon] >KQK06603.1 hypothetical protein BRADI_2g27230 [Brachypodium distachyon]	SacI homology domain	Probable phosphoinositide phosphatase SAC9 OS=Arabidopsis thaliana GN=SAC9 PE=1 SV=1	GO:0046488//phosphatidylinositol metabolic process;GO:0006970//response to osmotic stress;GO:0016021//integral component of membrane;GO:0042578//phosphoric ester hydrolase activity
CL5425.Contig10_All	K04733//interleukin-1 receptor-associated kinase 4 [EC:2.7.11.1]	XM_003577572.3 PREDICTED: Brachypodium distachyon tetrapyrrole-binding protein, chloroplastic (LOC100837008), mRNA	PREDICTED: tetrapyrrole-binding protein, chloroplastic [Brachypodium distachyon] >KQJ88674.1 hypothetical protein BRADI_4g20500 [Brachypodium distachyon]	GUN4-like	Tetrapyrrole-binding protein, chloroplastic OS=Arabidopsis thaliana GN=GUN4 PE=1 SV=1
CL9967.Contig1_All	K22611//squamous cell carcinoma antigen recognized by T-cells 3	XM_010235953.2 PREDICTED: Brachypodium distachyon squamous cell carcinoma antigen recognized by T-cells 3 (LOC100845498), transcript variant X2, mRNA	PREDICTED: squamous cell carcinoma antigen recognized by T-cells 3 [Brachypodium distachyon] >XP_010234255.1 PREDICTED: squamous cell carcinoma antigen recognized by T-cells 3 [Brachypodium distachyon] >KQJ94847.1 hypothetical protein BRADI_3g13610 [Brachypodium distachyon] >KQJ94848.1 hypothetical protein BRADI_3g13610 [Brachypodium distachyon]	Suppressor of forked protein (Suf)	U11/U12 small nuclear ribonucleoprotein 31 kDa protein OS=Arabidopsis thaliana GN=SNRNP31 PE=2 SV=1	GO:0006396//RNA processing;GO:0006397//mRNA processing;GO:0003723//RNA binding;GO:0005634//nucleus
Unigene33919_All		XM_010239074.2 PREDICTED: Brachypodium distachyon vacuolar protein sorting-associated protein 2 homolog 1-like (LOC100840560), transcript variant X2, mRNA
CL15328.Contig2_All	K22020//mucin-19	XM_020310192.1 PREDICTED: Aegilops tauschii subsp. tauschii vegetative cell wall protein gp1-like (LOC109751301), mRNA	PREDICTED: formin-like protein 18 [Brachypodium distachyon] >KQK13740.1 hypothetical protein BRADI_1g12170 [Brachypodium distachyon]		Alpha carbonic anhydrase 8 OS=Arabidopsis thaliana GN=ACA8 PE=3 SV=3
CL373.Contig8_All	K06066//CBF1 interacting corepressor	XM_003560493.3 PREDICTED: Brachypodium distachyon uncharacterized zinc finger CCHC domain-containing protein At4g19190 (LOC100833449), transcript variant X1, mRNA	uncharacterized zinc finger CCHC domain-containing protein At4g19190 [Aegilops tauschii subsp. tauschii]	N-terminal domain of CBF1 interacting co-repressor CIR	Uncharacterized zinc finger CCHC domain-containing protein At4g19190 OS=Arabidopsis thaliana GN=At4g19190 PE=2 SV=1	GO:0008270//zinc ion binding;GO:0003676//nucleic acid binding
Unigene15474_All	K02155//V-type H+-transporting ATPase 16kDa proteolipid subunit+ko04145//Phagosome+ko01100//Metabolic pathways+ko00190//Oxidative phosphorylation	AK428314.1 Brachypodium distachyon mRNA, clone: PL016C01-A-026_I05	PREDICTED: V-type proton ATPase 16 kDa proteolipid subunit-like [Oryza brachyantha]	ATP synthase subunit C	V-type proton ATPase 16 kDa proteolipid subunit OS=Avena sativa GN=VATP-P1 PE=2 SV=1	GO:0005774//vacuolar membrane;GO:0033179//proton-transporting V-type ATPase, V0 domain;GO:0015991//ATP hydrolysis coupled proton transport;GO:0016021//integral component of membrane;GO:0015078//hydrogen ion transmembrane transporter activity
CL6072.Contig7_All	K15436//transportin-3	AK334527.1 Triticum aestivum cDNA, clone: WT010_D01, cultivar: Chinese Spring	PREDICTED: uncharacterized protein LOC100825040 [Brachypodium distachyon] >KQJ88302.1 hypothetical protein BRADI_4g16893 [Brachypodium distachyon]	Exportin 1-like protein	Transportin MOS14 OS=Arabidopsis thaliana GN=MOS14 PE=1 SV=1	GO:0043484//regulation of RNA splicing;GO:0005634//nucleus;GO:0006606//protein import into nucleus
CL16584.Contig3_All	K20641//Rho GTPase-activating protein 20;K14307//nucleoporin p58/p45+ko03013//RNA transport	FP093995.1 Phyllostachys edulis cDNA clone: bphylf044e18, full insert sequence	PREDICTED: uncharacterized protein LOC100831718 [Brachypodium distachyon] >KQK10280.1 hypothetical protein BRADI_2g53150 [Brachypodium distachyon] >KQK10281.1 hypothetical protein BRADI_2g53150 [Brachypodium distachyon]	Transmembrane protein
CL6890.Contig1_All	K01850//chorismate mutase [EC:5.4.99.5]+ko01230//Biosynthesis of amino acids+ko01100//Metabolic pathways+ko01110//Biosynthesis of secondary metabolites+ko00400//Phenylalanine, tyrosine and tryptophan biosynthesis	XM_020304971.1 PREDICTED: Aegilops tauschii subsp. tauschii chorismate mutase 2 (LOC109745855), mRNA	chorismate mutase 2 [Aegilops tauschii subsp. tauschii]		Chorismate mutase 2 OS=Arabidopsis thaliana GN=CM2 PE=1 SV=1	GO:0046417//chorismate metabolic process;GO:0004106//chorismate mutase activity;GO:0009073//aromatic amino acid family biosynthetic process;GO:0005737//cytoplasm
Unigene49854_All	K14502//protein brassinosteroid insensitive 2 [EC:2.7.11.1]+ko04075//Plant hormone signal transduction	FP093961.1 Phyllostachys edulis cDNA clone: bphylf060p13, full insert sequence	shaggy-related protein kinase eta [Zea mays]	Protein kinase domain	Shaggy-related protein kinase eta OS=Arabidopsis thaliana GN=ASK7 PE=1 SV=2	GO:0004674//protein serine/threonine kinase activity;GO:0005524//ATP binding
CL4687.Contig7_All	K08193//MFS transporter, ACS family, solute carrier family 17 (sodium-dependent inorganic phosphate cotransporter), other	XM_003578575.3 PREDICTED: Brachypodium distachyon probable anion transporter 5, chloroplastic (LOC100836705), transcript variant X2, mRNA	PREDICTED: probable anion transporter 5, chloroplastic isoform X2 [Brachypodium distachyon] >KQJ91426.1 hypothetical protein BRADI_4g37610 [Brachypodium distachyon]	Major Facilitator Superfamily	Probable anion transporter 5, chloroplastic OS=Oryza sativa subsp. japonica GN=PHT4;5 PE=2 SV=2	GO:0005315//inorganic phosphate transmembrane transporter activity;GO:0016021//integral component of membrane;GO:0009536//plastid;GO:0098656//anion transmembrane transport
CL7796.Contig6_All	K03141//transcription initiation factor TFIIH subunit 1+ko03420//Nucleotide excision repair+ko03022//Basal transcription factors	XM_003573447.2 PREDICTED: Brachypodium distachyon probable RNA polymerase II transcription factor B subunit 1-1 (LOC100845916), transcript variant X1, mRNA	predicted protein, partial [Hordeum vulgare subsp. vulgare]	BSD domain	Probable RNA polymerase II transcription factor B subunit 1-1 OS=Arabidopsis thaliana GN=TFB1-1 PE=2 SV=1	GO:0005675//holo TFIIH complex;GO:0006281//DNA repair;GO:0006360//transcription from RNA polymerase I promoter;GO:0070816//phosphorylation of RNA polymerase II C-terminal domain;GO:0006366//transcription from RNA polymerase II promoter;GO:0006289//nucleotide-excision repair;GO:0000439//core TFIIH complex
CL7540.Contig4_All	K01247//DNA-3-methyladenine glycosylase II [EC:3.2.2.21]+ko03410//Base excision repair	XM_003567767.3 PREDICTED: Brachypodium distachyon putative DNA-3-methyladenine glycosylase YfjP (LOC100823568), mRNA	hypothetical protein PAHAL_C01823 [Panicum hallii]	HhH-GPD superfamily base excision DNA repair protein	Leucine-rich repeat extensin-like protein 5 OS=Arabidopsis thaliana GN=LRX5 PE=2 SV=2	GO:0006284//base-excision repair;GO:0003824//catalytic activity
CL10012.Contig10_All	K01338//ATP-dependent Lon protease [EC:3.4.21.53]	XM_020308119.1 PREDICTED: Aegilops tauschii subsp. tauschii lon protease homolog 2, peroxisomal (LOC109749132), mRNA	hypothetical protein PAHAL_B03623 [Panicum hallii]	Lon protease (S16) C-terminal proteolytic domain	Lon protease homolog 2, peroxisomal OS=Oryza sativa subsp. indica GN=LON1 PE=2 SV=1	GO:0004252//serine-type endopeptidase activity;GO:0005524//ATP binding;GO:0016560//protein import into peroxisome matrix, docking;GO:0005782//peroxisomal matrix;GO:0048527//lateral root development;GO:0016485//protein processing;GO:0006515//protein quality control for misfolded or incompletely synthesized proteins;GO:0004176//ATP-dependent peptidase activity;GO:0040007//growth
CL14793.Contig1_All	K14432//ABA responsive element binding factor+ko04075//Plant hormone signal transduction	FP098244.1 Phyllostachys edulis cDNA clone: bphylf047n22, full insert sequence	PREDICTED: ABSCISIC ACID-INSENSITIVE 5-like protein 2 [Brachypodium distachyon] >KQK02190.1 hypothetical protein BRADI_3g60870 [Brachypodium distachyon]	bZIP transcription factor	Protein FD OS=Arabidopsis thaliana GN=FD PE=1 SV=1	GO:0003677//DNA binding;GO:0005634//nucleus;GO:0003700//DNA binding transcription factor activity
Unigene32069_All	K12161//ubiquitin related modifier 1+ko04122//Sulfur relay system	FP092169.1 Phyllostachys edulis cDNA clone: bphylf002d19, full insert sequence	predicted protein [Hordeum vulgare subsp. vulgare] >BAJ92611.1 predicted protein [Hordeum vulgare subsp. vulgare]	Urm1 (Ubiquitin related modifier)	Ubiquitin-related modifier 1 homolog OS=Oryza sativa subsp. japonica GN=URM1 PE=3 SV=1	GO:0002098//tRNA wobble uridine modification;GO:0032447//protein urmylation;GO:0034227//tRNA thio-modification;GO:0005829//cytosol;GO:0005737//cytoplasm
CL10481.Contig5_All		XM_003574602.3 PREDICTED: Brachypodium distachyon uncharacterized LOC100843080 (LOC100843080), transcript variant X1, mRNA	PREDICTED: uncharacterized protein LOC100843080 isoform X1 [Brachypodium distachyon] >KQJ98702.1 hypothetical protein BRADI_3g38517 [Brachypodium distachyon]	HAUS augmin-like complex subunit 3
CL1323.Contig3_All		XM_010237331.1 PREDICTED: Brachypodium distachyon uncharacterized LOC100829020 (LOC100829020), transcript variant X2, mRNA	uncharacterized protein LOC109745350 [Aegilops tauschii subsp. tauschii]	Aminopeptidase P, N-terminal domain
Unigene15644_All	K14490//histidine-containing phosphotransfer peotein+ko04075//Plant hormone signal transduction	XM_003568738.3 PREDICTED: Brachypodium distachyon pseudo histidine-containing phosphotransfer protein 2 (LOC100833386), transcript variant X2, mRNA	pseudo histidine-containing phosphotransfer protein 2 [Aegilops tauschii subsp. tauschii] >EMS48717.1 Histidine-containing phosphotransfer protein 4 [Triticum urartu]	Hpt domain	Pseudo histidine-containing phosphotransfer protein 2 OS=Oryza sativa subsp. japonica GN=PHP2 PE=2 SV=3	GO:0016310//phosphorylation;GO:0005634//nucleus;GO:0005622//intracellular;GO:0005737//cytoplasm;GO:0009736//cytokinin-activated signaling pathway;GO:0000160//phosphorelay signal transduction system;GO:0043424//protein histidine kinase binding;GO:0004871//signal transducer activity;GO:0009927//histidine phosphotransfer kinase activity
CL97.Contig13_All	K10744//ribonuclease H2 subunit B+ko03030//DNA replication	XM_020322724.1 PREDICTED: Aegilops tauschii subsp. tauschii ribonuclease H2 subunit B-like (LOC109763852), transcript variant X6, mRNA	PREDICTED: ribonuclease H2 subunit B [Brachypodium distachyon] >KQJ83146.1 hypothetical protein BRADI_5g13357 [Brachypodium distachyon] >KQJ83147.1 hypothetical protein BRADI_5g13357 [Brachypodium distachyon]			GO:0005634//nucleus
CL6386.Contig3_All	K17964//leucine-rich PPR motif-containing protein, mitochondrial	XR_731718.2 PREDICTED: Brachypodium distachyon pentatricopeptide repeat-containing protein At1g09900 (LOC100835866), ncRNA	hypothetical protein BRADI_3g43280 [Brachypodium distachyon]	PPR repeat	Pentatricopeptide repeat-containing protein At1g09900 OS=Arabidopsis thaliana GN=At1g09900 PE=2 SV=1
Unigene19209_All	K07937//ADP-ribosylation factor 1+ko04144//Endocytosis;K07977//Arf/Sar family, other	FP096171.1 Phyllostachys edulis cDNA clone: bphyst015b18, full insert sequence	hypothetical protein PAHAL_B01372 [Panicum hallii]	ADP-ribosylation factor family	ADP-ribosylation factor 1 OS=Arabidopsis thaliana GN=ARF1 PE=1 SV=2
CL5056.Contig1_All	K18730//PERQ amino acid-rich with GYF domain-containing protein	XM_020306294.1 PREDICTED: Aegilops tauschii subsp. tauschii uncharacterized LOC109747201 (LOC109747201), transcript variant X1, mRNA	unnamed protein product [Triticum aestivum]
CL8578.Contig6_All	K18417//ERI1 exoribonuclease 2 [EC:3.1.-.-]	XM_003567286.3 PREDICTED: Brachypodium distachyon ERI1 exoribonuclease 2 (LOC100822635), mRNA	PREDICTED: ERI1 exoribonuclease 2 [Brachypodium distachyon] >KQK03954.1 hypothetical protein BRADI_2g10840 [Brachypodium distachyon]	Exonuclease	Uncharacterized exonuclease domain-containing protein At3g15140 OS=Arabidopsis thaliana GN=At3g15140 PE=2 SV=1	GO:0008270//zinc ion binding;GO:0003676//nucleic acid binding
CL5275.Contig4_All	K06180//23S rRNA pseudouridine1911/1915/1917 synthase [EC:5.4.99.23];K22733//magnesium transporter	XM_003559881.3 PREDICTED: Brachypodium distachyon putative pentatricopeptide repeat-containing protein At3g23330 (LOC100828742), mRNA	PREDICTED: putative pentatricopeptide repeat-containing protein At3g23330 [Brachypodium distachyon] >KQK15114.1 hypothetical protein BRADI_1g20737 [Brachypodium distachyon]	PPR repeat family	Pentatricopeptide repeat-containing protein At3g24000, mitochondrial OS=Arabidopsis thaliana GN=PCMP-H87 PE=3 SV=1	GO:0043231//intracellular membrane-bounded organelle;GO:0003723//RNA binding;GO:0008270//zinc ion binding;GO:0009451//RNA modification;GO:0004519//endonuclease activity
CL15107.Contig2_All		FP094439.1 Phyllostachys edulis cDNA clone: bphyst003b03, full insert sequence	membrane-anchored ubiquitin-fold protein 1 [Sorghum bicolor] >XP_021306474.1 membrane-anchored ubiquitin-fold protein 1 [Sorghum bicolor] >XP_021306475.1 membrane-anchored ubiquitin-fold protein 1 [Sorghum bicolor] >EER94679.1 hypothetical protein SORBI_3001G333600 [Sorghum bicolor]		Membrane-anchored ubiquitin-fold protein 1 OS=Oryza sativa subsp. japonica GN=MUB1 PE=3 SV=1	GO:0005886//plasma membrane
CL2822.Contig21_All
CL16958.Contig3_All			PREDICTED: filaggrin-like [Ipomoea nil]		Leucine-rich repeat extensin-like protein 3 OS=Arabidopsis thaliana GN=LRX3 PE=1 SV=1
CL518.Contig1_All	K14412//alpha-1,4-fucosyltransferase [EC:2.4.1.65]+ko01100//Metabolic pathways;K22410//PR domain zinc finger protein 16;K12309//beta-galactosidase [EC:3.2.1.23]+ko00600//Sphingolipid metabolism+ko00604//Glycosphingolipid biosynthesis - ganglio series+ko00531//Glycosaminoglycan degradation+ko00511//Other glycan degradation+ko01100//Metabolic pathways+ko00052//Galactose metabolism	XM_003564671.3 PREDICTED: Brachypodium distachyon zinc finger protein STOP1 homolog (LOC100830806), mRNA	PREDICTED: zinc finger protein STOP1 homolog [Brachypodium distachyon] >KQK10809.1 hypothetical protein BRADI_2g56320 [Brachypodium distachyon]	Zinc-finger double-stranded RNA-binding	Zinc finger protein STOP1 homolog OS=Oryza sativa subsp. japonica GN=Os01g0871200 PE=2 SV=1	GO:0010044//response to aluminum ion;GO:0005634//nucleus;GO:0010447//response to acidic pH;GO:0003700//DNA binding transcription factor activity;GO:0003676//nucleic acid binding
Unigene37145_All	K06185//ATP-binding cassette, subfamily F, member 2	XM_003573173.3 PREDICTED: Brachypodium distachyon ABC transporter F family member 1 (LOC100840133), mRNA	PREDICTED: ABC transporter F family member 1 [Brachypodium distachyon] >KQJ94694.1 hypothetical protein BRADI_3g12610 [Brachypodium distachyon]	ABC transporter	ABC transporter F family member 1 OS=Arabidopsis thaliana GN=ABCF1 PE=2 SV=1	GO:0005524//ATP binding;GO:0016887//ATPase activity
CL10828.Contig3_All	K21480//heme oxygenase (biliverdin-producing, ferredoxin) [EC:1.14.15.20]+ko00860//Porphyrin and chlorophyll metabolism+ko01100//Metabolic pathways+ko01110//Biosynthesis of secondary metabolites	FP098959.1 Phyllostachys edulis cDNA clone: bphylf047o08, full insert sequence	PREDICTED: probable inactive heme oxygenase 2, chloroplastic [Brachypodium distachyon] >KQK21399.1 hypothetical protein BRADI_1g60540 [Brachypodium distachyon]	Protein of unknown function (DUF722)	Probable inactive heme oxygenase 2, chloroplastic OS=Oryza sativa subsp. japonica GN=HO2 PE=2 SV=1	GO:0010024//phytochromobilin biosynthetic process;GO:0006788//heme oxidation;GO:0004392//heme oxygenase (decyclizing) activity;GO:0009507//chloroplast
CL16660.Contig7_All	K12133//MYB-related transcription factor LHY+ko04712//Circadian rhythm - plant	AK369412.1 Hordeum vulgare subsp. vulgare mRNA for predicted protein, complete cds, clone: NIASHv2090M12	protein REVEILLE 8-like isoform X1 [Aegilops tauschii subsp. tauschii]	Myb-like DNA-binding domain	Protein REVEILLE 6 OS=Arabidopsis thaliana GN=RVE6 PE=2 SV=1	GO:0003677//DNA binding;GO:0005634//nucleus;GO:0006355//regulation of transcription, DNA-templated;GO:0006351//transcription, DNA-templated
CL7808.Contig2_All	K02970//small subunit ribosomal protein S21+ko03010//Ribosome	XM_020301693.1 PREDICTED: Aegilops tauschii subsp. tauschii uncharacterized LOC109742590 (LOC109742590), mRNA	uncharacterized protein LOC109742590 [Aegilops tauschii subsp. tauschii]	Ribosomal protein S21		GO:0005840//ribosome;GO:0006412//translation;GO:0003735//structural constituent of ribosome
CL1894.Contig1_All	K14803//protein phosphatase PTC2/3 [EC:3.1.3.16]	XM_006657041.2 PREDICTED: Oryza brachyantha probable protein phosphatase 2C 57 (LOC102709658), mRNA	PREDICTED: probable protein phosphatase 2C 57 isoform X2 [Oryza sativa Japonica Group] >BAD33043.1 putative protein phosphatase 2C [Oryza sativa Japonica Group]	Protein phosphatase 2C	Probable protein phosphatase 2C 57 OS=Oryza sativa subsp. japonica GN=Os06g0597200 PE=2 SV=1	GO:0046872//metal ion binding;GO:0005634//nucleus;GO:0050688//regulation of defense response to virus;GO:0005829//cytosol;GO:0004722//protein serine/threonine phosphatase activity
Unigene39981_All	K08493//vesicle transport through interaction with t-SNAREs 1+ko04130//SNARE interactions in vesicular transport	FP097371.1 Phyllostachys edulis cDNA clone: bphylf024n01, full insert sequence	hypothetical protein PAHAL_E01942 [Panicum hallii]		Vesicle transport v-SNARE 13 OS=Arabidopsis thaliana GN=VTI13 PE=2 SV=1	GO:0006896//Golgi to vacuole transport;GO:0000149//SNARE binding;GO:0005484//SNAP receptor activity;GO:0006891//intra-Golgi vesicle-mediated transport;GO:0016192//vesicle-mediated transport;GO:0048280//vesicle fusion with Golgi apparatus;GO:0006623//protein targeting to vacuole;GO:0005829//cytosol;GO:0016021//integral component of membrane;GO:0031902//late endosome membrane;GO:0042147//retrograde…
CL6383.Contig2_All	K01872//alanyl-tRNA synthetase [EC:6.1.1.7]+ko00970//Aminoacyl-tRNA biosynthesis	XM_010234317.2 PREDICTED: Brachypodium distachyon TLC domain-containing protein 2 (LOC100842337), mRNA	PREDICTED: TLC domain-containing protein 2 [Brachypodium distachyon] >KQK10795.1 hypothetical protein BRADI_2g56250 [Brachypodium distachyon] >KQK10796.1 hypothetical protein BRADI_2g56250 [Brachypodium distachyon]	TLC domain		GO:0016021//integral component of membrane
Unigene843_All	K11864//BRCA1/BRCA2-containing complex subunit 3 [EC:3.4.19.-]+ko03440//Homologous recombination	XM_003567934.3 PREDICTED: Brachypodium distachyon lys-63-specific deubiquitinase BRCC36-like (LOC100822119), mRNA	hypothetical protein BRADI_2g18080, partial [Brachypodium distachyon]
Unigene18999_All	K00083//cinnamyl-alcohol dehydrogenase [EC:1.1.1.195]+ko01100//Metabolic pathways+ko01110//Biosynthesis of secondary metabolites+ko00940//Phenylpropanoid biosynthesis	XM_020317837.1 PREDICTED: Aegilops tauschii subsp. tauschii probable cinnamyl alcohol dehydrogenase 5 (LOC109758992), mRNA	probable cinnamyl alcohol dehydrogenase 5 [Aegilops tauschii subsp. tauschii]	Alcohol dehydrogenase GroES-like domain	Probable cinnamyl alcohol dehydrogenase 5 OS=Oryza sativa subsp. japonica GN=CAD5 PE=3 SV=2
CL351.Contig1_All	K02184//formin 2	XM_003577960.3 PREDICTED: Brachypodium distachyon uncharacterized LOC100828941 (LOC100828941), mRNA	PREDICTED: uncharacterized protein LOC100828941 [Brachypodium distachyon] >KQJ89914.1 hypothetical protein BRADI_4g28430 [Brachypodium distachyon]	Plant family of unknown function (DUF810)	Formin-like protein 14 OS=Arabidopsis thaliana GN=FH14 PE=3 SV=3
CL7245.Contig7_All	K14455//aspartate aminotransferase, mitochondrial [EC:2.6.1.1]+ko00250//Alanine, aspartate and glutamate metabolism+ko00220//Arginine biosynthesis+ko00330//Arginine and proline metabolism+ko01230//Biosynthesis of amino acids+ko00960//Tropane, piperidine and pyridine alkaloid biosynthesis+ko00350//Tyrosine metabolism+ko01100//Metabolic pathways+ko00950//Isoquinoline alkaloid biosynthesis+ko01110//…	XM_020291382.1 PREDICTED: Aegilops tauschii subsp. tauschii aspartate aminotransferase, mitochondrial-like (LOC109732187), mRNA	aspartate aminotransferase, mitochondrial-like [Aegilops tauschii subsp. tauschii]	Aminotransferase class I and II	Aspartate aminotransferase, mitochondrial OS=Arabidopsis thaliana GN=ASP1 PE=1 SV=1	GO:0009058//biosynthetic process;GO:0080130//L-phenylalanine:2-oxoglutarate aminotransferase activity;GO:0006520//cellular amino acid metabolic process;GO:0004069//L-aspartate:2-oxoglutarate aminotransferase activity;GO:0005739//mitochondrion;GO:0030170//pyridoxal phosphate binding
CL8683.Contig19_All	K10280//F-box and leucine-rich repeat protein 14;K10268//F-box and leucine-rich repeat protein 2/20	XM_010241785.2 PREDICTED: Brachypodium distachyon leucine-rich repeat-containing G-protein coupled receptor 4 (LOC100826929), transcript variant X2, mRNA	PREDICTED: leucine-rich repeat-containing G-protein coupled receptor 4 [Brachypodium distachyon] >XP_010240087.1 PREDICTED: leucine-rich repeat-containing G-protein coupled receptor 4 [Brachypodium distachyon] >KQJ83421.1 hypothetical protein BRADI_5g14870 [Brachypodium distachyon] >KQJ83422.1 hypothetical protein BRADI_5g14870 [Brachypodium distachyon] >KQJ83423.1 hypothetical protein BRADI_5g14…	Leucine rich repeat	LRR receptor-like serine/threonine-protein kinase ERL1 OS=Arabidopsis thaliana GN=ERL1 PE=1 SV=1
CL9339.Contig3_All	K13345//peroxin-12+ko04146//Peroxisome	XM_003573979.3 PREDICTED: Brachypodium distachyon peroxisome biogenesis protein 12 (LOC100830228), mRNA	peroxisome biogenesis protein 12 [Aegilops tauschii subsp. tauschii]	Zinc finger, C3HC4 type (RING finger)	Peroxisome biogenesis protein 12 OS=Arabidopsis thaliana GN=PEX12 PE=1 SV=2	GO:0005779//integral component of peroxisomal membrane;GO:1990429//peroxisomal importomer complex;GO:0008022//protein C-terminus binding;GO:0006513//protein monoubiquitination;GO:0016558//protein import into peroxisome matrix;GO:0008270//zinc ion binding;GO:0004842//ubiquitin-protein transferase activity
CL9509.Contig3_All	K11253//histone H3;K07953//GTP-binding protein SAR1 [EC:3.6.5.-]+ko04141//Protein processing in endoplasmic reticulum	AK360959.1 Hordeum vulgare subsp. vulgare mRNA for predicted protein, complete cds, clone: NIASHv1129G12	PREDICTED: transcription factor bHLH74-like isoform X2 [Brachypodium distachyon] >KQK13405.1 hypothetical protein BRADI_1g09960 [Brachypodium distachyon] >KQK13406.1 hypothetical protein BRADI_1g09960 [Brachypodium distachyon]	Pas factor saposin fold	Transcription factor bHLH74 OS=Arabidopsis thaliana GN=BHLH74 PE=1 SV=1	GO:0046983//protein dimerization activity
CL5845.Contig7_All	K16913//proline-, glutamic acid- and leucine-rich protein 1	XM_010235882.2 PREDICTED: Brachypodium distachyon proline-, glutamic acid- and leucine-rich protein 1 (LOC100828107), mRNA	PREDICTED: proline-, glutamic acid- and leucine-rich protein 1 [Brachypodium distachyon] >KQJ94583.1 hypothetical protein BRADI_3g11327 [Brachypodium distachyon]	rRNA processing/ribosome biogenesis
CL15875.Contig2_All	K13171//serine/arginine repetitive matrix protein 1+ko03015//mRNA surveillance pathway+ko03013//RNA transport	XM_020296643.1 PREDICTED: Aegilops tauschii subsp. tauschii uncharacterized LOC109737512 (LOC109737512), mRNA	hypothetical protein PAHAL_B00593 [Panicum hallii]	EF hand	Serine/arginine-rich splicing factor SR45 OS=Arabidopsis thaliana GN=SR45 PE=1 SV=1	GO:0005509//calcium ion binding
Unigene53984_All	K01180//endo-1,3(4)-beta-glucanase [EC:3.2.1.6]	XM_010235877.2 PREDICTED: Brachypodium distachyon uncharacterized LOC100841137 (LOC100841137), transcript variant X1, mRNA	hypothetical protein BRADI_3g11250 [Brachypodium distachyon]	Proliferating cell nuclear antigen, C-terminal domain	Probable WRKY transcription factor 19 OS=Arabidopsis thaliana GN=WRKY19 PE=3 SV=1
Unigene61834_All
Unigene51142_All
CL7653.Contig21_All	K17790//mitochondrial import inner membrane translocase subunit TIM22	FP096746.1 Phyllostachys edulis cDNA clone: bphyst028k22, full insert sequence	PREDICTED: outer envelope pore protein 16, chloroplastic [Oryza sativa Japonica Group] >AAU44206.1 putative amino acid selective channel protein [Oryza sativa Japonica Group] >BAF16360.1 Os05g0111200 [Oryza sativa Japonica Group] >BAG95191.1 unnamed protein product [Oryza sativa Japonica Group] >EEC78389.1 hypothetical protein OsI_18168 [Oryza sativa Indica Group] >EEE62078.1 hypothetical protein…	Tim17/Tim22/Tim23/Pmp24 family	Outer envelope pore protein 16, chloroplastic OS=Pisum sativum GN=OEP16 PE=1 SV=1	GO:0009611//response to wounding;GO:0009409//response to cold;GO:0009753//response to jasmonic acid;GO:0005773//vacuole;GO:0031305//integral component of mitochondrial inner membrane;GO:0009744//response to sucrose;GO:0045037//protein import into chloroplast stroma;GO:0015266//protein channel activity;GO:0005744//mitochondrial inner membrane presequence translocase complex;GO:0019904//protein dom…
CL474.Contig3_All	K14156//choline/ethanolamine kinase [EC:2.7.1.32 2.7.1.82]+ko01100//Metabolic pathways+ko00564//Glycerophospholipid metabolism	XM_003564349.3 PREDICTED: Brachypodium distachyon probable choline kinase 2 (LOC100834585), mRNA	hypothetical protein SETIT_001306mg [Setaria italica]	Choline/ethanolamine kinase	Probable choline kinase 1 OS=Arabidopsis thaliana GN=CK1 PE=2 SV=1
Unigene11902_All	K14190//GDP-L-galactose phosphorylase [EC:2.7.7.69]+ko01100//Metabolic pathways+ko00053//Ascorbate and aldarate metabolism+ko01110//Biosynthesis of secondary metabolites	XM_003577439.3 PREDICTED: Brachypodium distachyon GDP-L-galactose phosphorylase 1-like (LOC100821966), transcript variant X1, mRNA	predicted protein [Hordeum vulgare subsp. vulgare]	Domain of unknown function (DUF4922)	GDP-L-galactose phosphorylase 1 OS=Arabidopsis thaliana GN=VTC2 PE=1 SV=1	GO:0006006//glucose metabolic process;GO:0080048//GDP-D-glucose phosphorylase activity;GO:0005737//cytoplasm
CL652.Contig14_All		KJ513671.1 Triticum aestivum auxin-repressed protein (ARP1) mRNA, complete cds	PREDICTED: auxin-repressed 12.5 kDa protein [Brachypodium distachyon] >KQK14069.1 hypothetical protein BRADI_1g14170 [Brachypodium distachyon]	Dormancy/auxin associated protein	Dormancy-associated protein 1 OS=Pisum sativum GN=DRM1 PE=2 SV=1
CL7501.Contig5_All	K08332//vacuolar protein 8	XM_006645330.2 PREDICTED: Oryza brachyantha U-box domain-containing protein 44-like (LOC102704297), partial mRNA	U-box domain-containing protein 44-like [Aegilops tauschii subsp. tauschii]			GO:0005634//nucleus;GO:0005737//cytoplasm
CL16909.Contig7_All	K08998//uncharacterized protein	XR_002231624.1 PREDICTED: Aegilops tauschii subsp. tauschii UPF0161 protein At3g09310 (LOC109757778), transcript variant X5, misc_RNA	PREDICTED: uncharacterized protein LOC102703627 isoform X2 [Oryza brachyantha]	zinc-binding in reverse transcriptase	UPF0161 protein At3g09310 OS=Arabidopsis thaliana GN=At3g09310 PE=2 SV=2
CL13348.Contig1_All
Unigene30194_All	K11426//SET and MYND domain-containing protein;K17710//pentatricopeptide repeat domain-containing protein 1;K03006//DNA-directed RNA polymerase II subunit RPB1 [EC:2.7.7.6]+ko00230//Purine metabolism+ko03020//RNA polymerase+ko01100//Metabolic pathways+ko00240//Pyrimidine metabolism;K22020//mucin-19	XM_003579196.3 PREDICTED: Brachypodium distachyon uncharacterized LOC100828848 (LOC100828848), mRNA	uncharacterized protein LOC109771338 [Aegilops tauschii subsp. tauschii]	Protein of unknown function (DUF620)
CL12331.Contig1_All		FP101255.1 Phyllostachys edulis cDNA clone: bphyem102b10, full insert sequence	PREDICTED: endonuclease 2-like [Brachypodium distachyon] >KQJ85028.1 hypothetical protein BRADI_5g24430 [Brachypodium distachyon]	S1/P1 Nuclease	Endonuclease 2 OS=Arabidopsis thaliana GN=ENDO2 PE=1 SV=1	GO:0006308//DNA catabolic process;GO:0004519//endonuclease activity;GO:0003676//nucleic acid binding
CL4358.Contig2_All		FP100369.1 Phyllostachys edulis cDNA clone: bphyst028p11, full insert sequence	PREDICTED: protein LAZ1 homolog 1-like [Brachypodium distachyon] >KQK11583.1 hypothetical protein BRADI_2g60990 [Brachypodium distachyon]	Organic solute transporter Ostalpha	Protein LAZ1 OS=Arabidopsis thaliana GN=LAZ1 PE=1 SV=1	GO:0006810//transport;GO:0016021//integral component of membrane;GO:0005215//transporter activity
Unigene15868_All	K06955//uncharacterized protein;K04733//interleukin-1 receptor-associated kinase 4 [EC:2.7.11.1]	XM_003560005.3 PREDICTED: Brachypodium distachyon uncharacterized LOC100824134 (LOC100824134), mRNA	uncharacterized protein LOC109747932 isoform X1 [Aegilops tauschii subsp. tauschii]	NAD(P)-binding Rossmann-like domain	Formin-like protein 14 OS=Arabidopsis thaliana GN=FH14 PE=3 SV=3
CL383.Contig13_All	K00999//CDP-diacylglycerol--inositol 3-phosphatidyltransferase [EC:2.7.8.11]+ko01100//Metabolic pathways+ko04070//Phosphatidylinositol signaling system+ko00564//Glycerophospholipid metabolism+ko00562//Inositol phosphate metabolism	XM_003580538.3 PREDICTED: Brachypodium distachyon probable CDP-diacylglycerol--inositol 3-phosphatidyltransferase 2 (LOC100826194), mRNA	PREDICTED: probable CDP-diacylglycerol--inositol 3-phosphatidyltransferase 2 [Oryza brachyantha]	CDP-alcohol phosphatidyltransferase	CDP-diacylglycerol--inositol 3-phosphatidyltransferase 1 OS=Arabidopsis thaliana GN=PIS1 PE=1 SV=2	GO:0008654//phospholipid biosynthetic process;GO:0003881//CDP-diacylglycerol-inositol 3-phosphatidyltransferase activity;GO:0005794//Golgi apparatus;GO:0016021//integral component of membrane;GO:0006661//phosphatidylinositol biosynthetic process
CL1396.Contig3_All	K20286//TATA element modulatory factor	XM_003567863.3 PREDICTED: Brachypodium distachyon golgin candidate 5 (LOC100826537), transcript variant X2, mRNA	PREDICTED: golgin candidate 5 isoform X2 [Brachypodium distachyon] >KQK04922.1 hypothetical protein BRADI_2g16820 [Brachypodium distachyon]	TATA element modulatory factor 1 DNA binding	Golgin candidate 5 OS=Arabidopsis thaliana GN=GC5 PE=1 SV=1	GO:0005634//nucleus;GO:0005794//Golgi apparatus
Unigene23204_All		XM_020298042.1 PREDICTED: Aegilops tauschii subsp. tauschii uncharacterized LOC109738954 (LOC109738954), mRNA	uncharacterized protein LOC109738954 [Aegilops tauschii subsp. tauschii]	Myb-like DNA-binding domain	Transcription factor MYBS2 OS=Oryza sativa subsp. japonica GN=MYBS2 PE=2 SV=1	GO:0003677//DNA binding;GO:0005634//nucleus;GO:0006355//regulation of transcription, DNA-templated;GO:0008270//zinc ion binding;GO:0006351//transcription, DNA-templated
CL8847.Contig7_All	K00847//fructokinase [EC:2.7.1.4]+ko00520//Amino sugar and nucleotide sugar metabolism+ko01100//Metabolic pathways+ko00051//Fructose and mannose metabolism+ko00500//Starch and sucrose metabolism	XM_003558701.3 PREDICTED: Brachypodium distachyon 2-dehydro-3-deoxygluconokinase (LOC100834138), mRNA	fructokinase-1 [Aegilops tauschii subsp. tauschii]	pfkB family carbohydrate kinase	Proline-rich receptor-like protein kinase PERK9 OS=Arabidopsis thaliana GN=PERK9 PE=1 SV=1	GO:0046835//carbohydrate phosphorylation;GO:0005634//nucleus;GO:0019200//carbohydrate kinase activity;GO:0005737//cytoplasm
CL11446.Contig2_All	K02433//aspartyl-tRNA(Asn)/glutamyl-tRNA(Gln) amidotransferase subunit A [EC:6.3.5.6 6.3.5.7]+ko00970//Aminoacyl-tRNA biosynthesis+ko01100//Metabolic pathways;K19996//phosphatidylinositol transfer protein SFH5	XM_003573017.3 PREDICTED: Brachypodium distachyon phosphatidylinositol/phosphatidylcholine transfer protein SFH3 (LOC100835741), transcript variant X3, mRNA	PREDICTED: phosphatidylinositol/phosphatidylcholine transfer protein SFH3 isoform X1 [Brachypodium distachyon] >XP_010234173.1 PREDICTED: phosphatidylinositol/phosphatidylcholine transfer protein SFH3 isoform X1 [Brachypodium distachyon]	CRAL/TRIO domain	Phosphatidylinositol/phosphatidylcholine transfer protein SFH12 OS=Arabidopsis thaliana GN=SFH12 PE=2 SV=1	GO:0005622//intracellular;GO:0005215//transporter activity
CL13136.Contig5_All	K03006//DNA-directed RNA polymerase II subunit RPB1 [EC:2.7.7.6]+ko00230//Purine metabolism+ko03020//RNA polymerase+ko01100//Metabolic pathways+ko00240//Pyrimidine metabolism	XM_010238254.2 PREDICTED: Brachypodium distachyon nascent polypeptide-associated complex subunit alpha, muscle-specific form-like (LOC100828903), transcript variant X3, mRNA	PREDICTED: nascent polypeptide-associated complex subunit alpha, muscle-specific form-like isoform X1 [Brachypodium distachyon]		Leucine-rich repeat extensin-like protein 5 OS=Arabidopsis thaliana GN=LRX5 PE=2 SV=2
CL1441.Contig11_All	K12604//CCR4-NOT transcription complex subunit 1+ko03018//RNA degradation	XM_010236693.2 PREDICTED: Brachypodium distachyon CCR4-NOT transcription complex subunit 1 (LOC100843991), transcript variant X3, mRNA	CCR4-NOT transcription complex subunit 1-like [Aegilops tauschii subsp. tauschii]	CCR4-Not complex component, Not1
CL5650.Contig2_All		AK331028.1 Triticum aestivum cDNA, clone: SET5_O08, cultivar: Chinese Spring	hypothetical protein TRIUR3_20746 [Triticum urartu]			GO:0005783//endoplasmic reticulum
Unigene60255_All	K21343//ubiquitin carboxyl-terminal hydrolase 15 [EC:3.4.19.12]	XM_006663374.2 PREDICTED: Oryza brachyantha ubiquitin carboxyl-terminal hydrolase 5 (LOC102710539), partial mRNA	PREDICTED: ubiquitin carboxyl-terminal hydrolase 5 [Brachypodium distachyon] >KQJ88536.1 hypothetical protein BRADI_4g19177 [Brachypodium distachyon]		Ubiquitin carboxyl-terminal hydrolase 5 OS=Arabidopsis thaliana GN=UBP5 PE=1 SV=2	GO:0004843//thiol-dependent ubiquitin-specific protease activity;GO:0006511//ubiquitin-dependent protein catabolic process;GO:0016579//protein deubiquitination
CL9210.Contig2_All	K02732//20S proteasome subunit beta 6 [EC:3.4.25.1]+ko03050//Proteasome	XM_014901778.1 PREDICTED: Brachypodium distachyon proteasome subunit beta type-1 (LOC100841686), mRNA	PREDICTED: proteasome subunit beta type-1 [Brachypodium distachyon] >KQJ90923.1 hypothetical protein BRADI_4g34620 [Brachypodium distachyon]	Proteasome subunit	Proteasome subunit beta type-1 OS=Oryza sativa subsp. japonica GN=PBF1 PE=2 SV=1	GO:0005634//nucleus;GO:0051603//proteolysis involved in cellular protein catabolic process;GO:0004298//threonine-type endopeptidase activity;GO:0019774//proteasome core complex, beta-subunit complex;GO:0005737//cytoplasm;GO:0005839//proteasome core complex
CL9303.Contig2_All	K10406//kinesin family member C2/C3;K22020//mucin-19	XM_020303590.1 PREDICTED: Aegilops tauschii subsp. tauschii uncharacterized LOC109744468 (LOC109744468), mRNA	predicted protein [Hordeum vulgare subsp. vulgare]	Plant protein of unknown function (DUF868)	Serine/arginine-rich SC35-like splicing factor SCL33 OS=Arabidopsis thaliana GN=SCL33 PE=1 SV=1
Unigene46079_All
CL222.Contig92_All	K01681//aconitate hydratase [EC:4.2.1.3]+ko00020//Citrate cycle (TCA cycle)+ko01230//Biosynthesis of amino acids+ko01100//Metabolic pathways+ko01110//Biosynthesis of secondary metabolites+ko01210//2-Oxocarboxylic acid metabolism+ko01200//Carbon metabolism+ko00630//Glyoxylate and dicarboxylate metabolism	XM_003573339.3 PREDICTED: Brachypodium distachyon putative aconitate hydratase, cytoplasmic (LOC100838918), mRNA	PREDICTED: putative aconitate hydratase, cytoplasmic [Oryza sativa Japonica Group]	Aconitase family (aconitate hydratase)	Aconitate hydratase, cytoplasmic OS=Cucurbita maxima PE=2 SV=1	GO:0003994//aconitate hydratase activity;GO:0008152//metabolic process;GO:0051539//4 iron, 4 sulfur cluster binding
CL16584.Contig2_All		FP093995.1 Phyllostachys edulis cDNA clone: bphylf044e18, full insert sequence	hypothetical protein F775_32493 [Aegilops tauschii]	Transmembrane protein
CL16361.Contig3_All	K12126//phytochrome-interacting factor 3+ko04712//Circadian rhythm - plant+ko04075//Plant hormone signal transduction;K16189//phytochrome-interacting factor 4+ko04075//Plant hormone signal transduction	XM_014902663.1 PREDICTED: Brachypodium distachyon transcription factor BIM2 (LOC100837123), transcript variant X5, mRNA	transcription factor BIM2-like isoform X1 [Aegilops tauschii subsp. tauschii]	Helix-loop-helix DNA-binding domain	Transcription factor BIM1 OS=Arabidopsis thaliana GN=BIM1 PE=1 SV=2	GO:0046983//protein dimerization activity
Unigene42643_All
CL16239.Contig9_All	K19995//secretory carrier-associated membrane protein	AK371995.1 Hordeum vulgare subsp. vulgare mRNA for predicted protein, complete cds, clone: NIASHv2144K23	PREDICTED: secretory carrier-associated membrane protein 6 [Brachypodium distachyon] >KQJ84348.1 hypothetical protein BRADI_5g20280 [Brachypodium distachyon]	SCAMP family	Secretory carrier-associated membrane protein 6 OS=Oryza sativa subsp. japonica GN=SCAMP6 PE=2 SV=1	GO:0030658//transport vesicle membrane;GO:0016021//integral component of membrane;GO:0015031//protein transport;GO:0005886//plasma membrane
Unigene23800_All
CL16075.Contig4_All	K03236//translation initiation factor 1A+ko03013//RNA transport	XM_003563776.3 PREDICTED: Brachypodium distachyon eukaryotic translation initiation factor 1A (LOC100840401), mRNA	eukaryotic translation initiation factor 1A [Aegilops tauschii subsp. tauschii] >ADI47121.1 eukaryotic translation initiation factor 1A [Leymus chinensis] >BAJ94425.1 predicted protein [Hordeum vulgare subsp. vulgare] >BAJ88288.1 predicted protein [Hordeum vulgare subsp. vulgare] >BAK04646.1 predicted protein [Hordeum vulgare subsp. vulgare] >EMS65893.1 Eukaryotic translation initiation factor 1A…	Translation initiation factor 1A / IF-1	Eukaryotic translation initiation factor 1A OS=Triticum aestivum PE=1 SV=2	GO:0003743//translation initiation factor activity
CL10517.Contig2_All	K01900//succinyl-CoA synthetase beta subunit [EC:6.2.1.4 6.2.1.5]+ko00020//Citrate cycle (TCA cycle)+ko00640//Propanoate metabolism+ko01100//Metabolic pathways+ko01110//Biosynthesis of secondary metabolites+ko01200//Carbon metabolism	XM_003575334.3 PREDICTED: Brachypodium distachyon succinyl-CoA ligase [ADP-forming] subunit beta, mitochondrial (LOC100835038), mRNA	PREDICTED: succinyl-CoA ligase [ADP-forming] subunit beta, mitochondrial [Brachypodium distachyon] >KQK00391.1 hypothetical protein BRADI_3g49070 [Brachypodium distachyon]	ATP-grasp domain	Succinate--CoA ligase [ADP-forming] subunit beta, mitochondrial OS=Oryza sativa subsp. japonica GN=Os02g0621700 PE=1 SV=1	GO:0006099//tricarboxylic acid cycle;GO:0000287//magnesium ion binding;GO:0004775//succinate-CoA ligase (ADP-forming) activity;GO:0046686//response to cadmium ion;GO:0005524//ATP binding;GO:0005507//copper ion binding;GO:0005739//mitochondrion
CL8578.Contig3_All	K18417//ERI1 exoribonuclease 2 [EC:3.1.-.-]	XM_003567286.3 PREDICTED: Brachypodium distachyon ERI1 exoribonuclease 2 (LOC100822635), mRNA	PREDICTED: ERI1 exoribonuclease 2 [Brachypodium distachyon] >KQK03954.1 hypothetical protein BRADI_2g10840 [Brachypodium distachyon]	Exonuclease	Uncharacterized exonuclease domain-containing protein At3g15140 OS=Arabidopsis thaliana GN=At3g15140 PE=2 SV=1	GO:0008270//zinc ion binding;GO:0003676//nucleic acid binding
CL8459.Contig4_All	K03029//26S proteasome regulatory subunit N10+ko03050//Proteasome	XM_003563766.3 PREDICTED: Brachypodium distachyon uncharacterized LOC100837459 (LOC100837459), mRNA	PREDICTED: uncharacterized protein LOC100837459 [Brachypodium distachyon] >KQK18213.1 hypothetical protein BRADI_1g39220 [Brachypodium distachyon]	Protein of unknown function (DUF632)	Nitrate regulatory gene2 protein OS=Arabidopsis thaliana GN=NRG2 PE=1 SV=1
CL5659.Contig13_All	K06691//26S proteasome regulatory subunit N13+ko03050//Proteasome	XM_020293000.1 PREDICTED: Aegilops tauschii subsp. tauschii 26S proteasome regulatory subunit RPN13 (LOC109733789), mRNA	predicted protein [Hordeum vulgare subsp. vulgare]	UCH-binding domain	26S proteasome regulatory subunit RPN13 OS=Arabidopsis thaliana GN=RPN13 PE=1 SV=2	GO:0043130//ubiquitin binding;GO:0005634//nucleus;GO:0006511//ubiquitin-dependent protein catabolic process;GO:0061133//endopeptidase activator activity;GO:0008541//proteasome regulatory particle, lid subcomplex;GO:0070628//proteasome binding;GO:0005737//cytoplasm
CL13760.Contig2_All
Unigene49582_All	K14638//solute carrier family 15 (peptide/histidine transporter), member 3/4	AK366567.1 Hordeum vulgare subsp. vulgare mRNA for predicted protein, complete cds, clone: NIASHv2044E24	hypothetical protein PAHAL_H01930 [Panicum hallii]	POT family	Protein NRT1/ PTR FAMILY 4.4 OS=Arabidopsis thaliana GN=NPF4.4 PE=2 SV=1	GO:0016021//integral component of membrane;GO:0005215//transporter activity
CL11201.Contig8_All	K00981//phosphatidate cytidylyltransferase [EC:2.7.7.41]+ko01100//Metabolic pathways+ko01110//Biosynthesis of secondary metabolites+ko04070//Phosphatidylinositol signaling system+ko00564//Glycerophospholipid metabolism	XM_003564270.3 PREDICTED: Brachypodium distachyon phosphatidate cytidylyltransferase 1-like (LOC100836536), mRNA	PREDICTED: phosphatidate cytidylyltransferase 1-like [Brachypodium distachyon] >KQK12637.1 hypothetical protein BRADI_1g05050 [Brachypodium distachyon]	Cytidylyltransferase family	Phosphatidate cytidylyltransferase 1 OS=Solanum tuberosum GN=CDS1 PE=1 SV=1	GO:0006655//phosphatidylglycerol biosynthetic process;GO:0004605//phosphatidate cytidylyltransferase activity;GO:0016021//integral component of membrane;GO:0005789//endoplasmic reticulum membrane;GO:0016024//CDP-diacylglycerol biosynthetic process
CL16502.Contig6_All	K04733//interleukin-1 receptor-associated kinase 4 [EC:2.7.11.1]	FP099637.1 Phyllostachys edulis cDNA clone: bphylf052k09, full insert sequence	predicted protein [Hordeum vulgare subsp. vulgare]	Golgi-dynamics membrane-trafficking	Proline-rich receptor-like protein kinase PERK10 OS=Arabidopsis thaliana GN=PERK10 PE=1 SV=2	GO:0006810//transport;GO:0016021//integral component of membrane
CL9770.Contig1_All		XM_020342036.1 PREDICTED: Aegilops tauschii subsp. tauschii probable lysophospholipase BODYGUARD 3 (LOC109783430), mRNA	PREDICTED: uncharacterized protein LOC4349215 [Oryza sativa Japonica Group] >AAM88618.1 hypothetical protein [Oryza sativa Japonica Group] >AAP54782.1 hydrolase, alpha/beta fold family protein, expressed [Oryza sativa Japonica Group] >BAF27061.1 Os10g0532200 [Oryza sativa Japonica Group] >EAZ16783.1 hypothetical protein OsJ_32257 [Oryza sativa Japonica Group] >BAG97946.1 unnamed protein product […		Probable lysophospholipase BODYGUARD 3 OS=Arabidopsis thaliana GN=BDG3 PE=2 SV=1	GO:0016787//hydrolase activity;GO:0016021//integral component of membrane
[truncated: 32,455 more rows]
