# Supplementary material for: Transcriptome-Wide Gene Expression Plasticity in Stipa grandis in Response to Grazing Intensity Differences
Source: Int J Mol Sci. 2021 Nov 2;22(21):11882. doi: 10.3390/ijms222111882 (PMC8611654; doi:10.3390/ijms222111882)
Supplement: Supplementary file 1 [file ijms-22-11882-s001.zip › Table S4. Highly expressed differentially expressed genes under different grazing intensities.xlsx]

## Sheet: Sheet1
Gene ID	CK_1 FPKM	CK_2 FPKM	CK_3 FPKM	LG_1 FPKM	LG_2 FPKM	LG_3 FPKM	MG_1 FPKM	MG_2 FPKM	MG_3 FPKM	HG_1 FPKM	HG_2 FPKM	HG_3 FPKM	log2(LG/CK)	Qvalue(CK-vs-LG)	log2(MG/CK)	Qvalue(CK-vs-MG)	log2(HG/CK)	Qvalue(CK-vs-HG)	log2(MG/LG)	Qvalue(LG-vs-MG)	log2(HG/LG)	Qvalue(LG-vs-HG)	log2(HG/MG)	Qvalue(MG-vs-HG)
CL10012.Contig4_All	3.31	8.34	8.22	17.27	9.04	7.37	21.18	15.27	10.41	5.11	11.03	11.03	0.763528	1.05562e-111	1.23978	0	0.453696	5.70191e-37	0.476252	3.74979e-67	-0.309831	1.72664e-23	-0.786084	6.2178e-163
CL10024.Contig1_All	23.18	21.68	17.17	36.52	24.83	24.56	15.43	17.57	17.31	5.93	12.94	20.32	0.474468	9.9694e-52	-0.290662	3.68944e-16	-0.651297	6.24551e-66	-0.76513	1.43414e-118	-1.12576	1.09032e-227	-0.360635	1.43191e-19
CL10024.Contig4_All	10.44	10.62	3.54	12.96	11.85	13.11	12.07	20.8	20.87	2.54	9.54	9.89	0.62796	3.68554e-38	1.14017	1.94851e-144	-0.153186	0.00185839	0.512205	1.62109e-37	-0.781146	8.37588e-56	-1.29335	9.38476e-177
CL10037.Contig2_All	17.79	18.25	21.78	48.89	35.79	22.33	11.15	18.43	16.91	6.56	11.04	11.17	0.896085	1.37444e-95	-0.292145	2.14207e-08	-0.989245	1.05604e-61	-1.18823	4.24161e-150	-1.88533	1.52076e-298	-0.6971	1.30731e-28
CL10048.Contig4_All	72.75	37.61	89.27	40.42	19.65	28.73	30.25	38.96	43.27	38.33	66.35	64.23	-1.16371	0	-0.81508	2.33964e-274	-0.231269	5.20031e-29	0.348631	4.88633e-35	0.932442	2.38956e-296	0.583811	1.89113e-131
CL10065.Contig3_All	27.68	20.88	42.2	32.15	18.94	17.47	37.03	30.54	36.8	29.9	57.42	50.35	-0.40034	4.39979e-47	0.209359	4.41908e-17	0.608101	6.71364e-151	0.609699	4.07143e-114	1.00844	0	0.398742	1.88757e-70
CL10065.Contig4_All	28.49	20.83	35.89	29.59	19.67	21.44	46.37	31.07	41.01	37.31	70.37	67.27	-0.26524	1.85297e-20	0.48252	2.27399e-81	1.0459	0	0.74776	7.74803e-176	1.31114	0	0.563378	1.69578e-158
CL10067.Contig2_All	16.9	14.44	13.15	15.79	35.27	19.7	9.91	20.72	17.17	4.62	11.25	6.19	0.670379	4.91889e-121	0.114943	0.000121658	-1.00766	2.40399e-153	-0.555436	1.63775e-86	-1.67804	0	-1.1226	1.00286e-196
CL10067.Contig4_All	12.74	15.78	9.97	13.27	25.18	14.81	10.12	15.96	16.9	5.35	8.36	6.69	0.470059	5.13354e-49	0.168725	2.89981e-07	-0.910705	2.5714e-112	-0.301334	2.70956e-22	-1.38076	5.79288e-301	-1.07943	1.05816e-165
CL10067.Contig5_All	12.29	12.27	8.9	12.97	27.93	14.67	9.37	9.89	13.6	4	4.99	6.98	0.732392	8.37889e-122	-0.0198291	0.161485	-1.06153	4.93329e-138	-0.752221	7.17006e-127	-1.79392	0	-1.0417	1.56638e-131
CL1008.Contig5_All	53.05	110.15	46.25	100.72	105.49	104.66	89.36	125.15	144.08	34.08	24.81	68.73	0.573327	2.72516e-207	0.789042	0	-0.701196	1.38576e-200	0.215715	7.86535e-40	-1.27452	0	-1.49024	0
CL10087.Contig2_All	7.78	15.78	7.52	21.28	24.92	23.81	21.82	28.08	27.03	3.8	7.41	9.56	1.17462	1.97908e-181	1.32013	1.03109e-239	-0.570677	3.30124e-25	0.145505	3.92256e-06	-1.7453	0	-1.89081	0
CL10105.Contig2_All	17.23	22.68	14.98	64.67	25.82	29.12	13.11	23.59	25.58	5.52	13.9	18.94	1.12944	7.34352e-289	0.195848	4.96691e-08	-0.504941	1.20912e-34	-0.933591	1.32655e-210	-1.63438	0	-0.700789	4.9878e-69
CL10150.Contig2_All	24.37	20.83	30.49	13.99	8.21	19.44	20.01	15.59	18.62	41.88	64.17	57.93	-0.858348	6.58837e-108	-0.470447	3.64585e-38	1.12521	0	0.3879	3.78378e-20	1.98356	0	1.59566	0
CL10150.Contig4_All	9.26	7.6	8.13	4.01	2.06	3.9	9.92	3.23	6.29	18.04	31.96	32.52	-1.32152	2.69917e-80	-0.357312	8.21985e-10	1.73248	0	0.964206	1.54133e-38	3.054	0	2.08979	0
CL10162.Contig2_All	10.9	8.99	3.71	17.64	30.96	21.24	8.54	18.7	10.46	1.65	1.06	2.12	1.56651	0	0.687909	9.06607e-89	-2.28296	0	-0.878602	1.09633e-245	-3.84947	0	-2.97087	0
CL10173.Contig1_All	68.82	19.56	84.48	33.82	8.83	23.28	15.52	36.37	55.62	21.26	50.71	37.09	-1.38552	0	-0.673773	9.17152e-214	-0.657253	1.64425e-206	0.711743	8.42308e-148	0.728262	1.59787e-157	0.0165194	0.125088
CL10173.Contig7_All	39.6	11.11	36.73	24.21	11.48	19.63	42.14	40.86	37.77	13.79	21.98	17.43	-0.655807	1.47188e-100	0.476043	1.37312e-78	-0.709291	6.19282e-116	1.13185	0	-0.0534839	0.0216251	-1.18533	0
CL10179.Contig1_All	14.52	10.78	7.03	13.14	22.4	21.49	3.71	9.77	12.66	3.61	5.84	4.42	0.820038	8.66772e-165	-0.296366	3.04833e-16	-1.2163	6.48073e-180	-1.1164	3.5328e-273	-2.03634	0	-0.919936	2.36894e-93
CL10200.Contig1_All	24.47	16.98	36.28	15.13	8.93	10.52	9.92	14.78	11.35	8.1	26.76	17.82	-1.1633	1.38154e-204	-1.09471	4.33089e-185	-0.552875	8.67833e-59	0.0685936	0.0415626	0.61043	1.5994e-48	0.541837	4.20272e-39
CL10208.Contig3_All	16.23	29.66	15.62	9.75	10.02	12.61	3.14	6.14	3.4	7.21	8.32	9.06	-0.924918	1.20075e-262	-2.26732	0	-1.31849	0	-1.3424	5.64978e-251	-0.393575	3.00213e-32	0.948828	4.19513e-111
CL1021.Contig13_All	32.48	38.03	42.88	11.14	19.38	38.13	16.61	17.1	9.12	4.67	12.61	10.07	-0.723184	1.61273e-172	-1.39453	0	-2.04543	0	-0.671341	5.113e-92	-1.32225	1.38864e-284	-0.650904	7.40404e-56
CL10235.Contig3_All	16.7	14.23	14.29	21.54	31.7	29.97	10.15	21.16	19.24	6.98	13.65	15.15	0.881254	2.31541e-235	0.171594	1.03069e-08	-0.331621	9.19701e-24	-0.70966	1.14135e-161	-1.21288	0	-0.503215	5.45485e-55
CL10252.Contig8_All	45.94	25.14	84.28	50.58	32.43	19.11	76.9	20.57	47.81	84.09	147.51	145.2	-0.598423	5.69098e-97	-0.0874516	0.000365104	1.29139	0	0.510972	9.48091e-69	1.88981	0	1.37884	0
CL10316.Contig1_All	27.06	27.79	24.22	19.54	39.15	37.13	6.24	18.73	24.94	4.33	11.4	9.92	0.277987	3.55779e-32	-0.65331	8.58933e-123	-1.61786	0	-0.931297	3.08105e-272	-1.89584	0	-0.964547	3.97655e-153
CL10316.Contig2_All	27.6	27.94	25.75	22.29	38.83	34.52	12.04	21.29	28.3	6.47	13.09	12.13	0.235793	5.68435e-24	-0.390461	1.68783e-50	-1.35299	0	-0.626254	1.80844e-137	-1.58878	0	-0.962525	6.38367e-188
CL1032.Contig1_All	5.94	13.01	4.15	11.64	18.12	15.88	13.51	24.71	17.84	2.24	3.96	6.72	0.984235	4.07114e-147	1.29073	5.70757e-279	-0.829715	2.82959e-57	0.306494	9.40232e-24	-1.81395	0	-2.12044	0
CL1032.Contig9_All	10.79	7.05	13.18	8.63	3.8	6.28	13.31	12.38	9.65	9.61	19.57	20.54	-0.724844	2.47974e-60	0.195947	1.13037e-07	0.686885	4.14576e-88	0.920791	2.33252e-102	1.41173	1.69084e-285	0.490937	8.33781e-49
CL10345.Contig3_All	11.63	20.83	14.74	23.96	28.8	16.86	35.17	27.19	26.29	5.55	8.45	15.02	0.563171	1.67849e-76	0.915939	1.61834e-224	-0.693192	1.56035e-75	0.352768	7.3488e-42	-1.25636	2.92726e-296	-1.60913	0
CL10363.Contig5_All	11.57	14.91	16.47	7.9	7.95	8.14	5.08	8.94	9.81	11.05	22.34	21.14	-0.83824	1.60303e-105	-0.840447	1.17018e-105	0.350113	2.1348e-29	-0.0022071	0.23455	1.18835	7.4002e-239	1.19056	2.14237e-238
CL10407.Contig2_All	7.82	4.7	5.38	15.79	21.39	17.82	27.46	23.91	25.64	6.97	10.05	17.95	1.6238	8.02659e-164	2.11984	0	0.982008	1.33515e-49	0.496037	3.64078e-33	-0.641795	5.93015e-38	-1.13783	8.15913e-135
CL10442.Contig2_All	24.83	24.28	18.52	36.91	43.89	40.79	23.01	26.12	35.86	6.5	14.87	11.73	0.851367	2.95242e-115	0.34616	1.57755e-17	-1.01613	5.70999e-87	-0.505206	1.31965e-46	-1.8675	0	-1.36229	1.29022e-173
CL10448.Contig5_All	2.75	9.85	6.15	21.79	12.99	7.32	26.35	18.97	24.83	7.21	11.65	12.54	1.17137	6.18902e-126	1.91093	0	0.752322	1.93859e-46	0.739561	3.0775e-97	-0.419048	6.34082e-23	-1.15861	6.5778e-206
CL1046.Contig14_All	23.77	8.66	17.73	9.46	9.47	13.48	3.57	11.93	11.4	3.33	8.92	3.86	-0.62771	3.19234e-79	-0.886288	1.68168e-142	-1.63508	0	-0.258578	1.90108e-11	-1.00737	6.16076e-116	-0.748788	4.2648e-59
CL1046.Contig15_All	61.68	40.65	53.93	17.38	23.37	25.08	7.22	15.31	17.83	21.18	62.75	40.8	-1.24561	0	-1.94335	0	-0.320883	1.22377e-77	-0.697735	6.29436e-133	0.924728	0	1.62246	0
CL1046.Contig26_All	36.88	32.34	38.75	22.24	26.49	23.21	15.46	19.31	24.88	25.19	74.12	63.89	-0.583563	6.29418e-124	-0.847562	2.95543e-236	0.602674	1.53582e-199	-0.263999	2.28071e-20	1.18624	0	1.45024	0
CL1046.Contig46_All	30.06	7.87	28.29	8.29	8.88	11.4	5.62	12.89	13.21	8.58	27.72	17.59	-1.21062	0	-1.05097	1.17704e-257	-0.292523	6.38837e-28	0.159652	1.15026e-05	0.918097	1.86373e-170	0.758446	9.3003e-123
CL1046.Contig56_All	14.64	26.96	21.7	32.46	23.26	14.36	57.41	36.3	45.74	34.34	91.43	81.41	0.152389	2.05968e-05	1.15047	2.80944e-292	1.72217	0	0.998078	7.86749e-232	1.56978	0	0.571706	1.09553e-132
CL1046.Contig57_All	9.44	11.14	10.14	6.88	5.44	4.51	10	8.83	11.41	10.26	34.89	23.81	-0.863417	4.14846e-45	-0.0110994	0.222048	1.17622	9.34353e-166	0.852318	1.30626e-43	2.03963	0	1.18732	1.59304e-167
CL10476.Contig2_All	82.53	136.67	73.01	178.58	117.71	117.47	184.87	210.11	213.03	67.08	110.53	188.47	0.507562	1.10626e-167	1.07384	0	0.342091	2.00296e-73	0.566273	4.4594e-300	-0.165472	3.80623e-22	-0.731745	0
CL10484.Contig5_All	14.93	9.93	10.54	21.86	14.24	17.08	6.6	9.78	11.09	4.65	6.66	7.09	0.590635	4.14549e-65	-0.356625	2.09575e-18	-0.93682	3.14516e-96	-0.94726	5.30843e-145	-1.52745	0	-0.580195	1.01016e-33
CL10491.Contig1_All	122.54	100.29	118.04	64.07	60.99	75.02	50.46	77.78	52.55	68.52	141.71	157.12	-0.765549	0	-0.901558	0	0.117245	1.93325e-17	-0.136009	5.84508e-13	0.882794	0	1.0188	0
CL10491.Contig3_All	20.62	23.1	11.49	7.66	19.27	16.24	2.52	8.09	8.49	5.9	10.19	8.72	-0.353917	1.69598e-27	-1.51856	0	-1.14759	4.93785e-208	-1.16464	3.57178e-165	-0.793675	2.38999e-89	0.370964	1.4598e-14
CL10500.Contig4_All	29.06	23.91	29.6	13.08	22.05	22.07	5.45	13.29	10.98	5.11	10.29	7.66	-0.527436	1.19767e-59	-1.45972	0	-1.83187	0	-0.932283	3.31416e-110	-1.30444	9.59829e-191	-0.372154	5.87978e-13
CL10509.Contig3_All	13.72	16.45	13.85	31.03	25.98	23.46	7.59	20.04	21.49	4.88	6.25	7.98	0.872771	1.30999e-245	0.168243	6.92668e-09	-1.19814	2.92544e-227	-0.704529	2.67486e-169	-2.07091	0	-1.36638	0
CL10510.Contig1_All	89.97	100.42	104.52	43.32	51.4	67.68	56.43	39.81	20.73	45.36	32.5	51.13	-0.858129	0	-1.32392	0	-1.18365	0	-0.46579	2.75927e-89	-0.325518	1.5451e-47	0.140272	5.1655e-09
CL10524.Contig2_All	16	32.43	15.52	27.64	27.04	22.54	34.35	32.3	35.39	9.16	11.99	22.26	0.275035	2.92503e-20	0.682861	3.74723e-132	-0.548801	2.53518e-57	0.407827	7.92348e-53	-0.823836	1.57126e-139	-1.23166	0
CL10531.Contig8_All	10.56	15.48	8.28	20.25	23.81	8.65	9.79	18.16	27.09	4.56	7.52	5.71	0.62206	1.32219e-64	0.690991	6.43465e-81	-0.942459	3.44098e-86	0.0689313	0.0114296	-1.56452	2.08034e-290	-1.63345	0
CL10532.Contig1_All	21.04	27.26	16.34	39.41	35.53	23.16	21.71	17.83	27.42	7.49	11.62	10.42	0.608086	6.234e-52	0.066364	0.0426113	-1.1162	2.51316e-95	-0.541722	2.67129e-42	-1.72429	1.75491e-277	-1.18257	9.81378e-109
CL10560.Contig5_All	7.53	18	8.76	34.5	22.71	19.86	11.96	18.87	21.54	3.18	6.21	10.36	1.17505	1.06928e-106	0.631276	7.95922e-27	-0.774677	2.94872e-25	-0.543774	1.23695e-29	-1.94973	3.24584e-224	-1.40595	4.34252e-97
CL10569.Contig1_All	15.59	14.3	12.93	18.61	16.7	16.1	9.45	13.34	11.51	4.67	10.11	9.43	0.266487	4.65063e-19	-0.311183	5.51523e-21	-0.817775	7.80933e-114	-0.57767	5.12486e-74	-1.08426	5.33558e-218	-0.506592	2.82565e-40
CL10576.Contig10_All	121.07	113.07	125.2	101.46	112.07	75.49	41.64	66.33	52.13	42.51	85.5	62.66	-0.30852	3.81305e-60	-1.14757	0	-0.901516	0	-0.839049	1.57765e-290	-0.592996	9.58494e-161	0.246054	3.21242e-22
CL10576.Contig9_All	65.18	53.25	52.17	67.91	65.11	52.5	11.32	21.99	21.14	12.31	25.97	14.18	0.126171	2.17317e-07	-1.62978	0	-1.69025	0	-1.75595	0	-1.81642	0	-0.0604688	0.0501292
CL1058.Contig14_All	28.71	48.13	33.3	15.28	9.12	13.32	3.44	5.81	2.9	2.49	8.8	9.61	-1.54167	0	-3.16294	0	-2.38601	0	-1.62127	1.1466e-141	-0.844343	2.27593e-52	0.776929	5.16571e-26
CL1058.Contig19_All	16.65	10.28	29.26	353.28	261.25	331.46	552.62	422.73	520.52	1.57	3.11	5.56	4.0767	0	4.74177	0	-2.44538	0	0.665073	0	-6.52208	0	-7.18715	0
CL1058.Contig37_All	44.87	25.59	73.02	15.74	8.77	16.78	21.8	15.37	14.88	59.06	75.27	75.99	-1.79466	0	-1.46001	0	0.555337	0	0.334653	1.1652e-37	2.35	0	2.01535	0
CL1058.Contig40_All	18.68	15.08	30.53	22.24	15.22	10.28	34.47	26.99	23.5	32.56	115.3	123.13	-0.426312	2.11258e-67	0.406215	4.90566e-81	2.08003	0	0.832527	1.21939e-288	2.50634	0	1.67381	0
CL1058.Contig41_All	281.65	208.09	362.35	172.61	101.99	103.91	333.83	204.24	170.9	540.64	949.38	1021.63	-1.1651	0	-0.253411	3.10714e-118	1.57161	0	0.911689	0	2.73671	0	1.82502	0
CL1058.Contig42_All	42.85	53.74	56.45	98.67	85.53	60.62	153.08	159.69	134.17	258.7	468.95	484.54	0.681443	0	1.55607	0	2.99356	0	0.874628	0	2.31211	0	1.43749	0
CL1058.Contig47_All	52.19	55.67	33.19	153.15	154.09	142.07	48.48	129.19	53.09	13.84	21.52	27.08	1.67353	0	0.723368	0	-1.17038	0	-0.950159	0	-2.84391	0	-1.89375	0
CL10597.Contig8_All	45.7	49.23	43.49	77.84	71.07	68.68	50.16	64.62	60.27	20.44	28.93	26.47	0.65571	3.50947e-278	0.349008	6.29948e-72	-0.861084	3.50134e-285	-0.306702	1.27604e-69	-1.51679	0	-1.21009	0
CL106.Contig7_All	6.17	7.84	8.72	7.79	5.85	4.62	15.64	9.52	9.78	14.89	22.65	19.42	-0.312425	1.37242e-12	0.623528	8.44158e-61	1.33	0	0.935954	7.46451e-121	1.64242	0	0.706469	1.61637e-122
CL1062.Contig3_All	10.73	11.67	4.9	7.57	20.72	23	9.04	11.15	15.71	3.42	4.94	2.98	0.911217	9.2521e-88	0.406025	4.08424e-16	-1.26034	8.26771e-80	-0.505192	4.47205e-32	-2.17156	0	-1.66637	4.85493e-158
CL10661.Contig1_All	13.6	15.01	12.57	20.21	31.99	22.85	3.05	13.26	9.86	1.96	3.52	3.99	0.869928	1.18063e-87	-0.633708	8.4553e-29	-2.10658	2.1084e-182	-1.50364	8.59794e-207	-2.97651	0	-1.47287	2.18624e-72
CL10663.Contig3_All	129.29	137.85	133.25	78.72	75.51	122.73	16.29	48.74	35.35	49.94	84.98	40.39	-0.529772	0	-1.98242	0	-1.18763	0	-1.45265	0	-0.657863	0	0.794786	0
CL10663.Contig5_All	15.8	49.34	33.88	46.83	19.79	24.77	13.19	15.84	14.03	9.48	41.04	43.34	-0.112747	3.08226e-13	-1.1966	0	-0.074505	5.92381e-07	-1.08385	0	0.038242	0.0029358	1.1221	0
CL10679.Contig1_All	32.48	32.62	21.95	35.01	35.85	35.68	23.44	27.32	35.75	10.03	19.42	16.25	0.293766	1.6595e-43	-0.00202331	0.244008	-0.924441	3.14962e-274	-0.295789	8.06548e-44	-1.21821	0	-0.922418	9.6687e-272
CL10692.Contig5_All	46.47	50.23	75.88	20.71	39.61	58.1	35.73	27.99	19.92	11.88	23.61	19.74	-0.542275	1.8961e-146	-1.03639	0	-1.63635	0	-0.49411	3.49438e-85	-1.09408	0	-0.599966	1.41053e-86
CL1073.Contig3_All	14.33	16.3	12.03	24.5	22.04	22.31	15.49	18.39	21.04	5.12	11.22	14.15	0.693897	9.17879e-86	0.374541	1.15716e-23	-0.475073	2.52953e-28	-0.319356	5.59329e-22	-1.16897	1.98421e-205	-0.849614	1.39338e-97
CL10731.Contig3_All	44.12	33	16.12	18.95	34.83	19.4	11.09	22.72	17.2	5.92	9.31	10.14	-0.347711	3.17413e-51	-0.858155	2.38206e-253	-1.87109	0	-0.510444	1.80767e-80	-1.52338	0	-1.01294	6.47584e-186
CL10731.Contig5_All	46.99	60.63	16.17	28.75	49.58	30.3	8.94	30.32	18.87	6.18	9.54	18.15	-0.186976	1.40859e-22	-1.07656	0	-1.86136	0	-0.889585	0	-1.67438	0	-0.7848	7.02558e-143
CL10747.Contig6_All	17.44	17.95	17.62	27.6	30.1	26.16	28.95	33.13	24.22	7.7	14.18	20.58	0.666986	6.96655e-61	0.720408	8.60359e-72	-0.304377	9.43181e-11	0.0534215	0.0410654	-0.971363	1.48538e-115	-1.02478	6.4043e-130
CL10760.Contig1_All	5.71	11.1	9.29	14.26	20.98	20.01	17.73	9.21	12.58	11.72	14.14	14.03	1.0851	5.1731e-125	0.606799	2.3236e-34	0.620963	1.82191e-36	-0.478306	3.31399e-31	-0.464142	2.6412e-30	0.0141639	0.180387
CL10768.Contig4_All	24.8	29.79	22.19	30.08	32.88	36.52	14.79	30.87	22.39	14	18.03	16.09	0.37677	1.13814e-40	-0.159451	1.44926e-07	-0.666287	5.23089e-87	-0.536221	7.37527e-76	-1.04306	7.10582e-240	-0.506836	2.83595e-48
CL1083.Contig1_All	21.45	8.39	26.97	3.67	2.85	3.93	3	6.26	3.86	14.12	25.55	24.38	-2.43534	2.11351e-176	-2.08437	9.17366e-146	0.195477	0.000117434	0.350965	0.00172184	2.63082	2.30034e-221	2.27985	4.58528e-187
CL1083.Contig37_All	24.4	25.04	39.24	33.72	15.08	13.26	29.07	24.1	29.76	38.13	71.43	72.01	-0.510292	1.21919e-77	-0.0898754	0.00018155	1.04068	0	0.420417	1.94455e-51	1.55097	0	1.13055	0
CL10831.Contig2_All	29.42	20.08	36.22	10.63	6.06	8.88	6.06	13.81	8.66	18.24	31.73	25.55	-1.74219	0	-1.57596	0	-0.179018	3.52271e-18	0.166232	1.78259e-06	1.56317	0	1.39694	0
CL10861.Contig1_All	6.8	9.2	2.19	25.38	62.1	50.51	19.29	40.62	15.42	1	0.74	1.43	2.92409	0	2.06594	0	-2.51408	3.62812e-156	-0.85815	1.47223e-241	-5.43816	0	-4.58001	0
CL10871.Contig1_All	26.42	28.16	22.11	22.26	21.15	39.34	16.26	32.17	53.11	9.64	13.93	9.69	0.111688	1.7425e-05	0.414506	5.10738e-58	-1.19943	1.87136e-273	0.302817	6.11412e-33	-1.31112	0	-1.61394	0
CL10877.Contig2_All	16.55	11.86	11.93	13.83	15.02	23.39	9.28	11.78	11.58	5.49	10.38	9.34	0.373985	8.15493e-66	-0.299806	2.71674e-34	-0.674776	1.2796e-147	-0.67379	3.22085e-188	-1.04876	0	-0.37497	2.97098e-42
CL10889.Contig2_All	14.64	20.38	13.17	25.27	23.81	22.91	13.21	12.43	25.82	5.89	14.83	12.76	0.58541	5.84768e-31	0.112589	0.0141619	-0.507313	5.41355e-17	-0.472822	1.73097e-21	-1.09272	9.17036e-88	-0.619902	3.54321e-25
CL10889.Contig3_All	8.53	5.6	8.76	21.23	12.28	13.36	10.46	7.29	20.29	4.75	14.28	10.94	1.04184	4.3645e-48	0.751554	1.53712e-23	0.409069	1.17973e-07	-0.290284	1.92042e-06	-0.63277	5.68718e-22	-0.342485	4.43333e-07
CL10894.Contig1_All	17.44	13.37	29.35	15.55	9.27	15.44	19.52	21.95	20.63	18.62	36.26	35.57	-0.576874	7.88915e-96	0.0525712	0.0122963	0.593011	8.46774e-152	0.629446	3.25913e-115	1.16989	0	0.54044	3.96483e-128
CL10909.Contig3_All	12.95	31.79	22.21	37.84	25.47	18.74	82.12	45.44	41.39	43.45	72.08	81.74	0.298344	4.86531e-19	1.34479	0	1.56961	0	1.04644	0	1.27126	0	0.224824	4.25435e-26
CL1093.Contig3_All	9.18	10.9	4.3	16.54	18.61	13.86	9.3	15.62	17.71	5.34	12.21	16.76	1.01194	1.12285e-87	0.820992	1.51936e-54	0.506682	4.18142e-20	-0.19095	7.68885e-06	-0.505261	7.39906e-28	-0.314311	3.82869e-11
CL10934.Contig2_All	76.32	81.23	51.95	121.51	132.6	121.07	95.04	94.63	149.85	34.05	65.43	65.95	0.845424	0	0.710948	4.5401e-257	-0.326684	7.61921e-40	-0.134476	4.78309e-14	-1.17211	0	-1.03763	0
CL10944.Contig6_All	33.28	20.36	50.77	29.84	10.04	14.18	15.21	21.72	27.41	37.77	52.99	42.77	-0.945039	0	-0.691104	1.55046e-204	0.35921	2.25412e-81	0.253935	1.64371e-21	1.30425	0	1.05031	0
CL10956.Contig1_All	2.6	7.56	5.68	11.36	7.68	5.38	24.29	11.67	10.53	10.21	13.71	17.42	0.630901	1.06728e-17	1.56559	2.43377e-136	1.39786	5.7032e-104	0.934687	2.48126e-61	0.766961	1.97856e-40	-0.167725	0.000250377
CL1096.Contig103_All	64.38	54.64	105.78	72.78	29.28	49.86	258.96	126.95	143.89	173.25	242.18	254.12	-0.56111	2.51118e-236	1.24098	0	1.58119	0	1.80209	0	2.1423	0	0.340208	7.15171e-281
CL1096.Contig104_All	29.76	12.74	35.04	13.58	3.75	17.26	15.02	27.64	25.71	33.08	46.31	41.31	-1.16161	0	-0.174503	4.44944e-23	0.641062	0	0.987105	0	1.80267	0	0.815565	0
CL1096.Contig56_All	8.79	6.09	11.43	8.79	2.75	7.23	13.61	13.34	12.5	14.59	20.62	18.58	-0.483352	6.60015e-68	0.587612	5.37259e-143	1.03416	0	1.07096	0	1.51752	0	0.446551	4.36976e-119
CL10960.Contig3_All	15.3	16.91	24.23	7.75	10.16	7.41	6.12	6.79	7.82	4.21	14.81	9.92	-1.15531	4.07193e-303	-1.43994	0	-0.960563	6.80328e-226	-0.284635	7.13737e-13	0.194745	2.72763e-08	0.47938	1.36454e-35
CL10968.Contig3_All	11.14	8.69	18.92	11.18	17.36	20.3	8.8	9.25	8.23	5.85	10.98	6.61	0.339064	1.66676e-10	-0.541232	4.70554e-18	-0.71174	1.3415e-28	-0.880296	5.9595e-50	-1.0508	1.48476e-67	-0.170508	0.00513734
CL1100.Contig35_All	5.93	13.69	10.36	19.75	12.01	9.5	18.36	22.39	23.87	9.39	17.63	15.67	0.465114	2.35059e-28	1.11788	2.38416e-193	0.517315	1.62237e-35	0.652761	2.46706e-78	0.0522012	0.0299718	-0.60056	2.80542e-68
CL11028.Contig1_All	22.05	21.25	26.82	8.22	3.45	3.95	7.62	7.98	8.93	23.87	44.26	50.61	-2.16142	0	-1.50642	0	0.768183	6.30907e-193	0.655001	2.4281e-31	2.92961	0	2.27461	0
CL11057.Contig3_All	8.92	9.23	4.78	22.26	36.1	31.21	22.27	27.57	30.38	1.19	3.08	2.02	1.967	0	1.81493	0	-1.85986	9.02577e-191	-0.152068	1.17622e-10	-3.82686	0	-3.67479	0
CL11058.Contig6_All	5.5	11.12	8.39	15.11	9.4	4.94	21.56	12.76	18.18	8.86	17.37	18.29	0.242117	3.53276e-05	1.0817	6.78985e-92	0.844612	5.97578e-53	0.839579	1.07356e-60	0.602495	1.92683e-30	-0.237083	1.07762e-07
CL11077.Contig2_All	13.15	12.67	17.07	34.65	29.72	20.69	21.47	21.57	23.99	4.6	7.42	7.6	0.992947	1.75101e-152	0.656327	3.46027e-60	-1.11789	2.79106e-94	-0.33662	1.8715e-23	-2.11084	0	-1.77422	4.76599e-293
CL11086.Contig1_All	6.21	8.44	6.16	14.62	12.62	10.29	15.95	12.96	15.57	4.7	6.63	11.99	0.854412	3.00841e-71	1.10348	1.06014e-127	0.174628	0.000393674	0.249064	1.94581e-10	-0.679784	3.73402e-49	-0.928849	4.61802e-97
CL1109.Contig10_All	58.93	94.63	59.69	163.89	123.41	117.56	128.82	168.56	149.38	10.32	19.05	36.41	0.929431	0	1.08106	0	-1.68266	0	0.15163	7.24675e-26	-2.61209	0	-2.76372	0
CL11093.Contig1_All	5.45	4.77	3.45	25.39	15.53	16.87	7.85	26.09	24.79	10.08	10.43	23.92	2.08533	0	2.12027	0	1.71448	1.76804e-190	0.0349477	0.0989989	-0.370843	2.33047e-20	-0.40579	8.06288e-24
CL11105.Contig5_All	14.37	15.51	15.35	17.56	16.89	14.72	8.36	17.12	17.83	4.66	9.38	7.3	0.123757	0.000557699	-0.049692	0.0664573	-1.07562	4.32349e-113	-0.173449	4.62652e-06	-1.19938	1.80306e-146	-1.02593	6.99718e-101
CL11118.Contig1_All	6.91	10.14	5.85	16.92	16.45	11.13	15.52	13.66	10.7	3.53	4.38	6.9	0.961679	3.18172e-110	0.8086	2.942e-74	-0.620688	3.56529e-28	-0.153079	2.08531e-05	-1.58237	3.09222e-240	-1.42929	2.3298e-185
CL11132.Contig1_All	9.81	16.92	10.13	18.13	16.56	12.45	22.57	20.65	20.01	6.62	9.86	14.02	0.360554	4.56505e-13	0.793504	9.59295e-65	-0.258921	1.41966e-06	0.43295	5.07695e-23	-0.619475	1.21017e-32	-1.05242	1.49905e-103
CL11148.Contig2_All	55.32	77.38	40.29	71.52	143.65	104.54	51.85	103.98	107.72	19.9	30.98	45.19	0.887361	0	0.618471	0	-0.840359	0	-0.26889	5.80997e-88	-1.72772	0	-1.45883	0
CL11148.Contig3_All	35.97	61.58	33.84	72.62	114.23	82.71	61.53	84.73	93.54	17	27.06	28.7	1.03905	0	0.87885	0	-0.844389	1.51821e-230	-0.160202	4.94821e-23	-1.88344	0	-1.72324	0
CL11151.Contig1_All	33.03	24.19	22.52	30.13	45.27	68.29	25.73	30.92	29.48	14.52	23.9	21.5	0.851086	0	0.120246	3.17356e-07	-0.40636	5.84604e-54	-0.73084	1.3973e-270	-1.25745	0	-0.526606	1.27645e-92
CL11151.Contig7_All	27.98	42.3	12.44	22.57	59.9	66.36	4.11	18.12	16.15	4.83	2.64	3.87	0.847407	0	-1.09472	0	-2.86129	0	-1.94213	0	-3.7087	0	-1.76657	0
CL11156.Contig11_All	32.17	31.96	27.44	46.5	40.49	37.91	30.07	47.38	42.25	13.53	15.26	16.78	0.45041	3.75208e-113	0.395893	6.08002e-86	-1.0012	0	-0.0545173	0.00132006	-1.45161	0	-1.39709	0
CL11156.Contig13_All	21.34	16.7	16.68	22.15	29.6	24.82	12.19	22.92	22.44	5.31	6.01	6.19	0.487411	1.56624e-54	0.0853251	0.00420546	-1.63581	3.43692e-288	-0.402086	1.41431e-38	-2.12322	0	-1.72114	0
CL11156.Contig8_All	39.09	34.43	33	43.65	41.71	38.55	17.53	49.01	42.73	19.07	23.66	16.5	0.220674	4.82253e-29	0.0488103	0.00610038	-0.842421	6.68018e-278	-0.171864	1.5579e-18	-1.0631	0	-0.891232	0
CL11156.Contig9_All	14.8	41.06	21.86	83.2	44.84	24.39	126.15	74.68	82.98	39.69	52.07	80.92	0.978249	2.64645e-235	1.87991	0	1.1651	0	0.901664	0	0.186853	5.37298e-15	-0.71481	1.88838e-257
CL11177.Contig2_All	32.76	40.37	25.71	6.14	10.99	10.79	2.28	4.12	5.7	29.1	32.83	40.03	-1.81849	6.66341e-248	-3.00868	0	0.0626219	0.0293483	-1.1902	9.42606e-39	1.88111	1.1571e-272	3.0713	0
CL11183.Contig1_All	77.68	134.53	67.01	231.9	146.56	159.92	71.44	122.38	121.2	23.74	56.53	78.06	0.952297	0	0.189955	3.09461e-25	-0.804326	5.2456e-302	-0.762342	0	-1.75662	0	-0.994281	0
CL11198.Contig5_All	8.6	6.95	7.67	12.6	12.33	8.4	5.37	4.69	6.69	10.61	20.63	16.81	0.525832	6.2296e-23	-0.4607	2.69985e-13	1.05831	3.26856e-105	-0.986532	9.81862e-65	0.532479	1.40784e-33	1.51901	1.27632e-182
CL1123.Contig81_All	74.72	60.44	88.39	51.96	25.16	36.05	48.43	64.86	57.49	72.09	126.1	122.73	-0.978312	0	-0.379789	2.07488e-140	0.527138	0	0.598523	9.98601e-247	1.50545	0	0.906927	0
CL11244.Contig1_All	24.58	32.54	22.93	51.03	40.42	44.2	38.51	44.8	41.58	8	19.83	30.68	0.765153	3.59648e-153	0.655096	3.05253e-108	-0.439036	6.24239e-35	-0.110057	1.05314e-05	-1.20419	0	-1.09413	3.16287e-258
CL11244.Contig5_All	14.66	20.18	15.93	32.48	22.01	21.36	6.25	23.17	25.66	5.49	14.74	15.92	0.58345	1.5497e-61	0.132616	0.000220242	-0.480157	4.54816e-30	-0.450834	5.85793e-39	-1.06361	3.47044e-171	-0.612772	1.18913e-49
CL11244.Contig6_All	12.21	15.97	12.03	25.78	21.37	23.97	14	19.74	17.9	3.94	8.32	12.92	0.826405	3.06334e-100	0.374151	4.95656e-19	-0.66313	5.885e-40	-0.452255	3.3367e-35	-1.48953	9.17532e-258	-1.03728	2.20861e-107
CL11244.Contig8_All	16.13	15.42	13.76	26.79	24.62	25.34	11.63	18.47	19.87	3.68	9.77	12.14	0.764155	6.63039e-101	0.154048	5.11199e-05	-0.813485	2.85549e-67	-0.610106	4.46193e-68	-1.57764	0	-0.967533	5.25658e-99
CL11244.Contig9_All	21.81	32.65	19.14	60.55	32.33	40.55	32.82	47.12	37.89	9.66	21.09	35.14	0.862848	7.59661e-210	0.692292	1.3726e-127	-0.147781	3.39384e-06	-0.170556	4.14369e-12	-1.01063	9.38892e-275	-0.840073	1.05236e-178
CL11260.Contig8_All	24.19	18.81	30.84	22.84	15.34	14.22	27.54	25.67	22.04	27.36	44.94	41.53	-0.491653	5.62178e-86	0.0332061	0.0468419	0.628878	3.40993e-206	0.52486	2.48801e-98	1.12053	0	0.595672	1.59889e-186
CL11266.Contig3_All	16.35	9.45	20.72	15.55	42.64	36.72	9.32	10.47	24.83	8.47	21.98	26.12	1.033	8.69275e-138	-0.0463258	0.104584	0.29821	9.51162e-11	-1.07933	3.79985e-147	-0.73479	7.03832e-79	0.344536	1.90284e-13
CL11294.Contig7_All	13.46	13.57	13.06	15.88	22.13	11.74	15.8	14.4	16.48	14.11	28.3	37.71	0.318317	2.08851e-08	0.239072	2.25868e-05	1.01894	2.87386e-88	-0.0792449	0.0463226	0.700623	8.69602e-48	0.779868	1.33592e-56
CL11299.Contig1_All	9.66	15.85	14.67	29.63	21.08	18.64	27.18	25.87	24.54	6.15	9.44	11.64	0.793893	2.11978e-62	0.96657	7.25649e-97	-0.546011	4.74909e-20	0.172677	8.77073e-06	-1.3399	8.07413e-146	-1.51258	1.635e-195
CL11332.Contig2_All	11.18	12.57	9.84	18.46	30.24	18.43	7.16	12.16	18.37	2.97	7.11	8.31	1.00303	2.81031e-101	0.180827	0.00036054	-0.855345	4.02219e-40	-0.822199	1.40628e-72	-1.85837	1.6964e-257	-1.03617	2.67221e-61
CL11332.Contig3_All	13.2	19.62	10.12	28.01	25.13	21.93	6.12	11.44	18.83	5.66	10.53	13.94	0.811469	1.97745e-66	-0.221791	3.90223e-05	-0.494593	2.75777e-17	-1.03326	2.51722e-98	-1.30606	5.25223e-144	-0.272802	3.70549e-06
CL11343.Contig4_All	23	13.85	24.82	5.47	2.95	3.33	1.73	3.93	2.77	12.64	19.04	13.57	-2.38799	0	-2.85777	0	-0.44213	7.39135e-52	-0.469783	2.16241e-12	1.94586	0	2.41564	0
CL1136.Contig9_All	10.22	24.03	18.79	19.42	15.34	14.42	63.13	29.08	28.09	45.61	56.05	66.12	-0.105257	0.0019473	1.18822	0	1.67039	0	1.29348	0	1.77564	0	0.482168	1.8257e-101
CL11364.Contig2_All	9.24	8.21	8.03	16	12.19	13.69	10.93	13.98	12.45	2.75	6.36	7.51	0.719722	5.72879e-103	0.559808	1.59138e-59	-0.610448	4.57222e-48	-0.159914	7.49659e-08	-1.33017	1.88492e-283	-1.17026	4.67309e-207
CL11369.Contig5_All	16.99	30.06	19.4	34.38	29.49	24.87	53.83	42.97	38.03	16.75	18.15	43.12	0.420814	9.83971e-48	1.02937	0	0.24245	2.43932e-16	0.608555	2.52882e-138	-0.178364	3.54307e-11	-0.786919	5.75239e-218
CL1137.Contig15_All	5.58	13.06	9.02	15	11.5	9.03	26.94	14.89	20.6	7.29	18.96	21.82	0.367003	1.62751e-10	1.18649	7.42936e-122	0.811398	1.21886e-51	0.819489	1.09253e-66	0.444395	3.96666e-19	-0.375095	7.32709e-18
CL1140.Contig3_All	22.76	13.09	35.87	14.17	9.04	11.39	4.08	6.16	5.3	5.66	9.89	10.99	-1.04656	1.39953e-153	-2.19222	0	-1.42323	1.11555e-249	-1.14565	2.12437e-86	-0.376666	3.05785e-14	0.768987	1.47886e-35
CL1140.Contig4_All	81.53	70.27	108.63	7.18	8.3	12.63	2.47	5.51	2.48	21.8	58.55	42.25	-3.20958	0	-4.62233	0	-1.07962	0	-1.41275	2.08986e-115	2.12995	0	3.54271	0
CL11434.Contig3_All	11.59	15.93	7.44	10.19	30.71	18.3	8.77	12.29	8.32	4.57	7.24	6.44	0.760152	1.30783e-134	-0.241152	3.04992e-11	-0.93295	9.42978e-114	-1.0013	8.90963e-213	-1.6931	0	-0.691799	3.38415e-58
CL11442.Contig5_All	10.09	15.32	8.47	31.63	25.92	21.74	9.89	16.92	23.99	5.39	9.13	9.13	1.23173	8.71949e-148	0.600383	1.33344e-29	-0.504431	2.05052e-15	-0.631349	9.09292e-49	-1.73616	5.05781e-247	-1.10481	3.46714e-81
CL11443.Contig12_All	10.62	9.74	9.92	12.93	13.56	13.35	14.85	20.26	30.89	5.97	13.05	6.38	0.39746	6.1041e-24	1.13208	1.83435e-232	-0.249146	6.96743e-09	0.734617	5.50191e-113	-0.646607	3.92059e-56	-1.38122	0
CL11462.Contig35_All	9.75	16.94	6.98	15.78	25.68	16.83	17.85	22.66	20.43	4.98	6.53	9.12	0.797528	3.45771e-46	0.876009	1.20804e-56	-0.688862	8.04236e-22	0.0784817	0.0316665	-1.48639	3.0637e-124	-1.56487	2.3306e-140
CL1147.Contig14_All	39.32	52.36	24.08	26.29	96.09	88.89	10.11	33.6	36.66	13.22	10.5	16.59	0.868008	0	-0.514471	3.5219e-114	-1.51473	0	-1.38248	0	-2.38273	0	-1.00025	1.73791e-254
CL11492.Contig1_All	18.29	20.53	11.67	36.79	23.92	24.13	14.14	16.21	5.49	2.6	4.28	6.69	0.753589	1.22236e-103	-0.479651	1.19016e-28	-1.88342	1.66432e-258	-1.23324	9.51188e-232	-2.63701	0	-1.40377	4.96711e-122
CL1150.Contig51_All	9.91	12.51	25.71	7.9	2.73	7.66	8.57	6.89	10.17	17.09	45.48	36.28	-1.39299	0	-0.906466	4.46304e-201	1.04105	0	0.486524	3.7923e-37	2.43404	0	1.94752	0
CL11539.Contig2_All	12.58	10.6	10.29	16.04	23.42	16.9	14.53	19.59	16.88	7.96	5.25	7.84	0.755174	7.24965e-70	0.62111	1.24865e-45	-0.6597	6.48073e-34	-0.134064	0.000204057	-1.41487	2.41183e-193	-1.28081	7.89185e-151
CL11545.Contig1_All	126.97	247.05	159.62	38.25	73.16	136.73	44.04	41.87	57.78	24.57	28.82	31.17	-1.10249	0	-1.87957	0	-2.64595	0	-0.777087	2.59939e-243	-1.54346	0	-0.766375	2.89292e-140
CL11545.Contig2_All	191.1	240.21	145.11	64.06	106.31	178.81	90.82	79.73	99.49	62.76	79.1	71.64	-0.720501	0	-1.08016	0	-1.42146	0	-0.359656	3.74448e-83	-0.700954	8.55454e-280	-0.341298	1.03321e-59
CL11545.Contig4_All	33.7	44.13	29.13	7.45	17.49	27.91	7.7	7.47	12.74	4.27	5.14	5.36	-1.01456	3.64002e-151	-1.9241	0	-2.84306	0	-0.909549	4.48582e-63	-1.8285	2.95026e-184	-0.918954	2.70591e-35
CL11562.Contig2_All	5.7	10.92	3.78	7.23	3.34	3.66	9.17	4.3	8.84	19.13	26.38	22.52	-0.512925	1.40511e-09	0.142629	0.0215202	1.75096	9.13599e-201	0.655554	4.71249e-15	2.26388	1.98647e-280	1.60833	1.9482e-177
CL11629.Contig3_All	8.43	15.01	4.19	16.74	18.2	17.9	8.81	10.89	13.44	4.04	5.59	11.49	0.940254	5.06009e-61	0.278709	6.57016e-06	-0.369663	9.69266e-08	-0.661545	6.15721e-34	-1.30992	7.57906e-104	-0.648371	1.28625e-21
CL1166.Contig19_All	8.45	8.8	6.54	11.63	8.26	7.29	20.94	14.43	16.74	10.66	16.26	26.46	0.195754	8.2976e-05	1.13902	2.89632e-143	1.17634	4.35523e-156	0.943266	2.14499e-105	0.980581	8.35756e-117	0.0373149	0.0806192
CL11673.Contig3_All	27	49.38	29.31	10.6	19.52	30.75	12.15	11.03	5.77	2.46	5.92	4.81	-0.79478	2.28088e-154	-1.85666	0	-2.99451	0	-1.06188	3.66564e-144	-2.19973	0	-1.13785	1.31001e-78
CL11673.Contig4_All	23.26	40	18.43	9.48	16.32	24.92	11.86	11.03	5.29	3.4	6.23	4.98	-0.686413	2.31293e-92	-1.52344	0	-2.47564	0	-0.837023	8.566e-81	-1.78923	1.42537e-264	-0.952206	3.155e-57
CL1168.Contig11_All	72.34	131.01	96.68	219.62	165.92	127.26	238.02	217.13	251.18	88.67	110.7	157.7	0.778029	0	1.24655	0	0.262383	8.28396e-61	0.468517	0	-0.515646	3.66764e-300	-0.984163	0
CL1168.Contig3_All	134.8	113.52	69.01	101.92	34.87	143.06	215.41	253.05	108.59	47.57	84.73	69.11	-0.177882	4.93773e-34	0.875179	0	-0.648571	0	1.05306	0	-0.470689	2.81412e-183	-1.52375	0
CL11690.Contig5_All	15.87	5.62	9.85	7.22	5.85	7.68	9.21	7.79	11.35	8.9	18.11	15.31	-0.592072	8.62626e-51	-0.139629	6.07284e-05	0.438531	1.53161e-40	0.452444	6.20714e-29	1.0306	6.57462e-176	0.578159	1.48502e-65
CL11690.Contig7_All	21.24	10.27	18.11	9.2	11.26	12.45	3.38	9.24	8.29	5.79	11.34	6.79	-0.590211	1.53153e-79	-1.23495	2.4645e-273	-1.04891	1.32473e-212	-0.644735	6.07623e-62	-0.458698	5.04952e-35	0.186036	3.76684e-06
CL11697.Contig7_All	29.1	14.03	22.2	9.01	21.07	26.33	3.54	13.49	10.34	4.48	7.35	3.94	-0.2113	7.06831e-16	-1.24174	0	-2.04648	0	-1.03044	8.83219e-218	-1.83518	0	-0.804739	5.26006e-72
CL11706.Contig2_All	5.39	10.45	5.55	13.23	19.82	14.48	17.27	11.37	17.22	3.4	6.13	8.57	1.15976	2.23072e-54	1.12235	2.95511e-50	-0.216654	0.00652591	-0.0374105	0.143789	-1.37641	2.99864e-71	-1.339	4.02183e-66
CL11709.Contig5_All	25.82	15.53	27.27	33.67	23.97	28.64	22.81	34.84	40.47	8.7	16.76	15.26	0.333287	3.34183e-42	0.524735	1.94789e-108	-0.747444	2.37268e-142	0.191447	9.75774e-18	-1.08073	0	-1.27218	0
CL11735.Contig4_All	18.59	12.74	26.98	4.22	2.31	2.49	6.78	17.97	12.73	35.82	29.79	16.55	-2.6875	0	-0.624516	1.1041e-79	0.498598	8.28185e-76	2.06299	0	3.1861	0	1.12311	6.56636e-303
CL11742.Contig2_All	14.69	13.88	11.54	17.77	17.93	18.91	9.89	12.61	16.54	3.65	6.92	7.81	0.449669	7.56661e-22	-0.0245421	0.174582	-1.11171	1.82631e-73	-0.474211	8.9446e-24	-1.56138	3.80418e-167	-1.08717	1.93134e-69
CL1176.Contig19_All	27.22	16.51	22.44	18.27	29.1	34.73	7.03	12.08	11.89	5.79	12.9	11.19	0.313169	9.21839e-28	-1.08182	4.85825e-192	-1.13973	1.14559e-210	-1.39499	0	-1.4529	0	-0.0579059	0.0529558
CL1176.Contig5_All	104.67	112.49	76.24	81.54	157.01	182.32	20.07	67.63	68.53	21.83	45.94	25.88	0.521008	0	-0.897996	0	-1.64412	0	-1.419	0	-2.16513	0	-0.746121	0
CL1176.Contig7_All	36.4	40.84	22.67	29.31	63.9	54.03	9.97	22.78	22.79	9.64	18.12	16.43	0.560801	8.45319e-142	-0.834679	1.95523e-192	-1.16982	0	-1.39548	0	-1.73062	0	-0.335141	1.81721e-22
CL1179.Contig15_All	28.81	13.03	41.51	13.05	5.32	7.49	6.41	7.96	7.24	22.63	33.37	18.47	-1.68411	0	-1.93898	0	-0.158205	1.85269e-10	-0.254871	2.00205e-08	1.5259	0	1.78077	0
CL11810.Contig2_All	12.96	9.87	12.01	15.77	15.74	15.76	9.88	12.27	12.91	5.7	7.96	8.78	0.444416	3.87797e-20	0.0233727	0.180282	-0.623024	6.66693e-27	-0.421044	2.65044e-18	-1.06744	1.1235e-87	-0.646397	7.1467e-29
CL11840.Contig1_All	32.88	12.92	25.66	6.06	6.51	3.83	0.94	3.35	2.66	23.58	25.1	13.91	-2.11973	0	-3.34814	0	-0.187212	2.68444e-13	-1.22841	1.78072e-79	1.93252	0	3.16093	0
CL11866.Contig1_All	40.85	44.54	34.53	25.43	22.8	20.32	15.09	34.11	35.81	15.22	28.44	10.83	-0.803041	2.5944e-186	-0.483013	4.08804e-76	-1.1329	0	0.320029	1.78622e-26	-0.329855	2.52844e-23	-0.649884	3.96796e-93
CL1187.Contig1_All	14.41	22.99	25.18	17.35	15.77	13.72	8.82	10.32	17.04	13.12	28.69	34.54	-0.416597	7.93384e-57	-0.78587	1.37207e-173	0.291994	1.13199e-36	-0.369273	1.43985e-34	0.708592	2.70773e-179	1.07786	0
CL1187.Contig8_All	74.11	46.46	52.12	33.02	19.69	28.15	30.35	37.74	32.33	37.81	71.59	55.49	-1.09072	0	-0.772194	0	-0.0604323	0.000253624	0.318526	1.9075e-38	1.03029	0	0.711762	3.02851e-265
CL11883.Contig1_All	8.16	11.31	7.07	19.84	14.43	11.74	12.49	10.99	11.67	4.07	8.51	8.12	0.798297	1.70119e-59	0.417019	1.38204e-15	-0.348495	2.44842e-09	-0.381278	5.76928e-17	-1.14679	2.88524e-108	-0.765514	3.99952e-43
CL11883.Contig3_All	11.58	14.5	12.99	24.12	19.6	15.91	12.77	15.68	15.08	6.04	12.09	9.95	0.614777	4.50804e-49	0.169307	7.95568e-05	-0.46647	9.61995e-21	-0.44547	5.30008e-28	-1.08125	3.17237e-127	-0.635776	8.95969e-39
CL1191.Contig5_All	5.71	7.74	5.42	8.54	6.38	7.04	23.03	16.34	14.55	9.89	15.03	16.12	0.223313	0.00024431	1.52588	2.16709e-189	1.13156	1.22917e-92	1.30256	3.47352e-149	0.908245	2.43419e-65	-0.394318	1.63148e-20
CL11914.Contig2_All	33.29	52.8	33.68	54.48	51.84	51.73	42.89	67.68	70.32	20.21	20.83	40.57	0.403701	7.33626e-65	0.607747	9.62274e-155	-0.541795	3.35757e-84	0.204046	1.28358e-21	-0.945496	1.5939e-290	-1.14954	0
CL11922.Contig1_All	11.44	15.71	12.41	34.7	45.38	36.79	38.92	49.38	39.54	5.63	10.4	12.85	1.56571	0	1.70408	0	-0.444378	1.92676e-23	0.138366	2.66205e-09	-2.01009	0	-2.14846	0
CL11922.Contig4_All	5.85	7.44	7.13	13.25	11.24	12.51	17.78	17.24	14.71	5.17	7.66	10.14	0.861655	5.93196e-57	1.29627	1.79768e-146	0.181062	0.000958178	0.434611	1.05024e-23	-0.680593	4.93121e-39	-1.1152	2.1638e-116
CL11979.Contig5_All	31.74	21.21	16.49	12.02	15.52	10.6	8.6	9.65	13.18	25.29	32.12	37.98	-0.858526	2.7925e-62	-1.12593	2.59178e-96	0.474308	2.17169e-31	-0.267399	9.54535e-06	1.33283	6.16854e-175	1.60023	4.59546e-228
CL12.Contig29_All	46.08	24.54	43.22	15.69	15.53	22.38	5.02	20.75	18.76	18.13	19.52	13.49	-1.08446	0	-1.34065	0	-1.14967	0	-0.256189	5.89575e-16	-0.0652138	0.00617955	0.190975	1.33289e-09
CL120.Contig9_All	10.12	15.29	8.03	10.56	19.8	13.89	3.54	10.83	12.52	4.39	5.91	6.71	0.407142	6.75782e-20	-0.299957	1.83281e-09	-0.966142	2.10236e-65	-0.707099	1.30618e-50	-1.37328	6.55479e-150	-0.666185	5.52134e-29
CL12005.Contig5_All	6.7	6.56	9.68	18.92	9.34	13.94	14.64	16.29	13.76	5.44	9.49	3.97	0.885743	1.04065e-43	0.981198	8.92779e-55	-0.267452	0.000206768	0.095455	0.0243012	-1.1532	2.91042e-67	-1.24865	2.08232e-80
CL1202.Contig13_All	8.83	9.7	12.15	2.45	2.97	2.78	7.82	4.13	5	19.71	32.19	29.92	-1.90247	0	-0.853664	3.32839e-99	1.41952	0	1.04881	1.14335e-77	3.322	0	2.27319	0
CL12022.Contig3_All	14.36	31.01	10.5	14.88	15.28	12.16	7.28	10.66	8.32	3.97	8.82	8.64	-0.396448	4.74163e-19	-1.07358	2.96804e-101	-1.37034	2.1232e-149	-0.677136	3.15532e-36	-0.973895	4.20295e-67	-0.296759	1.32662e-06
CL12045.Contig4_All	26.2	26.52	30.44	14.8	16.77	9.94	4.3	5.87	7.9	12.43	18.54	19.71	-0.998435	2.05672e-161	-2.19078	0	-0.704367	2.54307e-90	-1.19234	9.58186e-108	0.294068	4.53568e-13	1.48641	1.78559e-185
CL1206.Contig64_All	128.97	95.9	114.06	41.34	28.71	76.29	22.28	59.33	85.36	122.35	163.76	128.37	-1.20923	0	-1.0103	0	0.296514	4.03257e-127	0.198926	3.87928e-25	1.50574	0	1.30682	0
CL12069.Contig11_All	29.17	25.44	22.01	12.22	39.63	27.14	10.43	13.46	14.24	8.27	14.74	12.99	0.0435656	0.0145406	-0.99955	0	-1.08518	0	-1.04312	0	-1.12874	0	-0.0856294	0.00213508
CL12069.Contig14_All	26.46	24.22	30.64	16.58	41.09	27.36	7.4	18.72	13.98	7.36	12.28	13.51	0.063079	3.45592e-05	-1.01082	0	-1.29169	0	-1.0739	0	-1.35477	0	-0.280874	1.44322e-31
CL12069.Contig17_All	27.26	15.94	22.86	12.92	35.92	25.18	5.26	16.87	11.73	6.06	9.93	7.09	0.164119	1.87478e-14	-0.951725	4.90947e-289	-1.51392	0	-1.11584	0	-1.67804	0	-0.562199	2.13091e-61
CL12069.Contig19_All	123.3	149.76	101.44	121.13	117.27	94.21	57.85	75.18	51.07	79.01	167.11	150.67	-0.166476	1.57813e-23	-1.00831	0	0.0951392	1.04301e-09	-0.841835	0	0.261615	7.67338e-58	1.10345	0
CL12069.Contig20_All	191.75	141.75	176.16	235.67	330.44	200.47	144.27	252.69	212.03	81.12	120.69	109.95	0.590777	0	0.267179	6.71355e-197	-0.703709	0	-0.323598	0	-1.29449	0	-0.970887	0
CL12069.Contig23_All	28.35	13.8	27.1	20.29	40.67	29.79	9.4	22.73	18.69	8.7	13.06	10.19	0.390366	2.32981e-95	-0.436902	1.68286e-89	-1.11274	0	-0.827268	0	-1.50311	0	-0.675838	2.94571e-145
CL12069.Contig26_All	93.36	79.91	129.03	39.7	61.73	56.52	14.24	46.5	27.72	25.44	47.63	47.47	-0.936402	0	-1.76089	0	-1.32306	0	-0.82449	0	-0.386662	2.43237e-168	0.437828	2.3697e-161
CL12069.Contig27_All	30.11	16.27	16.99	14.21	27.51	23.04	5.91	13.97	11.51	8.28	17.2	11.84	0.0321802	0.0481188	-1.00282	3.45225e-290	-0.760028	1.37173e-183	-1.03501	0	-0.792208	9.70261e-202	0.242797	6.19072e-15
CL12069.Contig28_All	77.82	42.23	49.12	20.38	46.21	41.51	9.16	24.92	16.86	17.65	45.69	33.94	-0.645877	0	-1.72023	0	-0.794989	0	-1.07436	0	-0.149113	2.4218e-20	0.925245	0
CL12069.Contig29_All	33.42	29.49	34.88	17.14	26.48	24.14	7.73	18.75	12.02	11.05	20.1	21.35	-0.528879	9.8835e-210	-1.33467	0	-0.893824	0	-0.805792	2.44417e-304	-0.364945	3.59962e-75	0.440847	4.32582e-82
CL12069.Contig33_All	81.88	53.94	70.94	42.04	91.02	70.82	19.55	46.14	33.58	20.45	42.76	34.87	-0.0204978	0.0158843	-1.04894	0	-1.07315	0	-1.02845	0	-1.05266	0	-0.0242092	0.03044
CL12069.Contig34_All	11.35	13.01	10.98	18.22	18.14	16.35	8.26	16.66	15.52	3.75	7.73	10.67	0.579063	1.56796e-98	0.203793	2.57373e-12	-0.668201	5.84529e-86	-0.37527	3.57635e-45	-1.24726	0	-0.871994	6.56406e-155
CL12113.Contig14_All	71.24	71.03	41.12	41.07	130.7	103.03	15.52	40.35	52.79	18.25	37.18	19.92	0.584253	1.86297e-290	-0.743564	6.2413e-296	-1.27803	0	-1.32782	0	-1.86228	0	-0.534463	8.00645e-100
CL12122.Contig1_All	24.4	25.46	18.94	8.77	11.66	13.02	9.48	13.51	27.22	23.68	42.39	33.86	-1.03645	6.51261e-102	-0.440696	5.17859e-24	0.550839	3.35002e-51	0.595755	4.57794e-30	1.58729	5.26386e-288	0.991535	2.06117e-138
CL12126.Contig3_All	31.82	18.72	39.75	19.97	12.52	16.55	13.05	17.05	19.13	23.8	41.24	33.74	-0.875513	1.79124e-128	-0.86145	1.22022e-124	0.139781	1.70479e-06	0.0140628	0.186926	1.01529	5.96358e-182	1.00123	6.76088e-177
CL12128.Contig1_All	42.32	64.08	60.55	35.9	67.59	113.18	40.9	50.98	48.92	12.47	18.77	26.46	0.378181	6.94817e-69	-0.231979	3.35783e-22	-1.52057	0	-0.61016	3.63291e-162	-1.89876	0	-1.2886	0
CL12142.Contig19_All	28.48	32.02	39.23	38.06	26.45	31.42	44.26	36.7	39.12	7.4	15.36	7.73	-0.0523291	0.0148985	0.276715	6.08729e-29	-1.70365	0	0.329045	2.21841e-39	-1.65132	0	-1.98036	0
CL12154.Contig1_All	8.03	12.34	6.29	39.49	26.93	27.43	30.49	32.72	25.39	3.02	6.46	6.39	1.82102	0	1.74795	0	-0.734808	2.36306e-26	-0.0730661	0.00919681	-2.55583	0	-2.48276	0
CL12154.Contig2_All	11.16	14.25	10.6	43.11	33.29	38.85	18.43	36.45	25.39	3.81	8.3	7.05	1.68314	0	1.17538	1.68988e-153	-0.897777	1.98874e-45	-0.507754	2.07671e-52	-2.58092	0	-2.07316	0
CL12154.Contig3_All	4.77	11.7	4.94	41.94	22.53	16.43	56.81	35.62	34.97	3.88	9.68	10.9	1.92658	3.59243e-201	2.59519	0	0.214457	0.00373268	0.668607	1.76691e-60	-1.71212	1.22733e-172	-2.38073	0
CL12164.Contig3_All	57.61	32.77	86.38	31.49	17.66	15.95	47.21	32.54	52.33	34.18	43.53	39.51	-1.43544	0	-0.410455	5.15332e-68	-0.582868	8.68316e-129	1.02499	1.37362e-252	0.852576	3.10876e-167	-0.172413	1.77114e-11
CL12177.Contig1_All	14.33	14.08	10.39	33.77	18.01	25.42	8.72	24.28	16.26	3.34	7.87	5.8	0.996001	9.30958e-288	0.357046	3.69674e-31	-1.18538	4.77533e-193	-0.638955	3.25247e-134	-2.18138	0	-1.54243	0
CL12177.Contig4_All	8.4	11.47	7.16	21.83	15.29	18.79	12.04	21.19	14.42	2.87	7.6	6.17	1.05147	8.64923e-218	0.828832	1.36966e-125	-0.694265	1.38207e-53	-0.22264	1.14189e-14	-1.74574	0	-1.5231	0
CL1218.Contig8_All	10.55	7.26	13.59	20.13	9.92	9.76	23.67	17.97	14.91	5.31	11.24	9.26	0.34771	3.28472e-14	0.858842	1.50211e-91	-0.274327	3.90363e-08	0.511132	1.34434e-37	-0.622037	2.27816e-38	-1.13317	1.26722e-144
CL12199.Contig1_All	10.74	12.27	9.06	20.98	22.19	15.24	14.14	16.61	14.86	4.88	9.48	11.15	0.869947	9.84356e-69	0.524027	2.62116e-23	-0.316156	8.68186e-08	-0.345921	1.83879e-14	-1.1861	2.67982e-114	-0.840183	1.44335e-51
CL122.Contig17_All	25.38	11.59	20.08	10.21	21.55	20.95	5.59	10.2	9.2	4	9.4	6.18	-0.111767	0.0011831	-1.17641	3.62837e-147	-1.53398	3.17971e-222	-1.06464	4.4325e-116	-1.42221	2.74864e-184	-0.357566	8.28721e-10
CL1223.Contig11_All	20.54	31.99	11.56	28.47	41.67	23.12	25.55	20.86	20.72	3.27	2.88	4.72	0.543176	2.18006e-93	0.074046	0.0038133	-2.55176	0	-0.46913	1.63058e-71	-3.09494	0	-2.62581	0
CL12248.Contig2_All	21.48	36.72	14.18	20.11	26.08	13.01	11.22	18.17	12.82	3.31	4.88	4.88	-0.284244	6.95739e-11	-0.758011	3.40717e-56	-2.45537	0	-0.473766	4.76809e-21	-2.17113	1.09021e-228	-1.69736	7.35329e-119
CL12249.Contig3_All	13.79	9.26	10.99	12.31	13.45	19.39	6.37	10.75	9.18	3.24	6.38	5.54	0.408252	6.43102e-126	-0.365476	1.2752e-77	-1.16534	0	-0.773728	0	-1.5736	0	-0.799867	1.21853e-245
CL1225.Contig45_All	131.86	60.22	189.18	80.67	26.23	37.05	13.03	47.58	50.04	71.08	115.25	77.98	-1.39937	0	-1.77058	0	-0.521712	3.64544e-285	-0.371211	2.07045e-58	0.877659	0	1.24887	0
CL1227.Contig1_All	24.67	22.05	19.25	8.91	6.49	5.13	3.9	4.44	5.77	22.19	41.89	35.09	-1.67892	1.37366e-288	-2.21488	0	0.597232	3.76967e-82	-0.535965	2.54764e-15	2.27615	0	2.81212	0
CL1227.Contig18_All	11.3	18.49	11.1	8.68	5.32	4.16	5.88	3.99	8.14	25.27	37.92	36.54	-1.16648	3.57489e-119	-1.17627	2.27979e-120	1.2944	0	-0.00978715	0.215858	2.46088	0	2.47067	0
CL12277.Contig3_All	18.73	13.19	16.07	14.83	27.25	21.98	8.34	14.91	13.51	7.33	12.9	10.09	0.419067	4.53751e-33	-0.371612	1.87547e-20	-0.654848	8.87883e-55	-0.790679	4.65694e-99	-1.07391	1.37948e-166	-0.283236	1.52132e-10
CL1233.Contig4_All	14.01	12.32	8.01	15.67	18.21	13.64	7.01	11.77	10.8	4.99	5.53	8.39	0.471856	2.18654e-26	-0.20174	2.57094e-05	-0.849893	1.45676e-52	-0.673595	3.32141e-48	-1.32175	1.92763e-146	-0.648153	3.04923e-29
CL1236.Contig8_All	14.84	25.67	15.16	25.88	40.52	28.66	29.46	31.17	26.11	7.14	13.82	16.25	0.774446	1.54692e-128	0.651363	2.00509e-87	-0.571305	2.06208e-45	-0.123083	8.6972e-06	-1.34575	0	-1.22267	1.10638e-250
CL12374.Contig1_All	26.05	16.38	33.33	9.05	6.58	9.96	5.89	9.38	9.37	23.04	38.25	36.99	-1.56239	0	-1.60983	0	0.382224	1.8033e-53	-0.0474455	0.085785	1.94461	0	1.99206	0
CL12414.Contig3_All	19.05	19.15	19.69	14.03	18.38	12.99	12.44	14.84	14.21	16.26	31.71	35.49	-0.345535	8.69269e-14	-0.464092	1.93336e-22	0.54225	3.86097e-42	-0.118557	0.00671206	0.887784	8.24135e-98	1.00634	2.44707e-119
CL12416.Contig2_All	15.42	18.81	16.51	30.13	25.32	32.37	22.37	37	28.06	4.11	12.47	12.05	0.793404	3.67646e-232	0.794344	4.86621e-232	-0.820154	2.48218e-143	0.000940378	0.23548	-1.61356	0	-1.6145	0
CL12416.Contig4_All	12.08	11.74	12.72	14.71	12.32	16.25	6.88	14.95	12.4	2.2	5.01	7.17	0.246475	7.86833e-15	-0.0834864	0.00508162	-1.33893	2.20617e-224	-0.329962	2.57293e-24	-1.58541	0	-1.25545	4.13964e-191
CL12416.Contig6_All	9.89	11.19	12.04	15.76	13.56	15.33	7.01	17.12	15.4	2.8	5.67	7.61	0.432705	4.47492e-40	0.26559	2.15655e-15	-1.03581	2.03086e-134	-0.167114	4.80806e-08	-1.46852	0	-1.3014	2.12314e-230
CL12419.Contig2_All	12.66	22.21	8.15	28.19	28.66	22.83	11.48	21.19	24.98	7.9	5.11	13.88	0.89633	1.41427e-62	0.445279	1.27474e-14	-0.655883	4.84107e-21	-0.451051	1.06199e-19	-1.55221	3.55359e-148	-1.10116	1.89608e-64
CL12422.Contig3_All	16.96	14.68	14.08	11.68	12.9	11.78	4.08	8.54	7.25	6.81	10.37	10.25	-0.32848	3.58862e-25	-1.19202	5.54683e-229	-0.731303	4.92234e-103	-0.863539	6.38177e-108	-0.402823	1.40067e-29	0.460716	2.47928e-28
CL12434.Contig1_All	13.28	15.21	11.09	26.08	23.75	19.58	17.75	20.18	17.92	5.26	9.96	9.57	0.817358	1.55479e-49	0.519293	3.74212e-19	-0.656249	1.69662e-20	-0.298065	2.19036e-09	-1.47361	2.03321e-126	-1.17554	7.05663e-73
CL12436.Contig2_All	4.13	6.95	7.16	14.39	13.6	11.55	32.97	14.95	18.79	2.82	6.3	8.48	1.12572	4.10396e-42	1.8951	1.88683e-150	-0.0250338	0.184303	0.769373	6.38343e-38	-1.15076	3.62858e-44	-1.92013	7.3758e-154
CL12458.Contig2_All	10.57	14.56	7.57	12.24	21.56	18.47	8.9	9.76	13.76	4.79	9.28	9.46	0.678974	3.25183e-58	-0.0026002	0.250602	-0.465296	7.49275e-20	-0.681574	2.75321e-58	-1.14427	2.77357e-139	-0.462696	1.5957e-19
CL12458.Contig3_All	13.05	16.74	8.15	16.27	25.86	22.33	9.65	12	17.96	5.11	9.97	10.86	0.767259	3.44806e-89	0.07244	0.0309415	-0.538797	1.73105e-29	-0.694819	6.83608e-75	-1.30606	1.90488e-213	-0.611237	4.30368e-38
CL12506.Contig2_All	23.14	26.4	18.97	36.65	38.01	32.19	23.86	31.08	37.3	11.93	18.06	20.57	0.645692	7.80779e-84	0.442835	1.12637e-37	-0.426381	9.70425e-27	-0.202856	3.17472e-11	-1.07207	2.36321e-198	-0.869216	1.38844e-121
CL12514.Contig3_All	17.49	27.05	12.42	4.09	9.42	9.72	7.95	6.86	19.08	13.7	21.4	15.27	-1.29196	2.68905e-166	-0.74115	4.29703e-67	-0.169491	4.51657e-06	0.55081	7.90883e-25	1.12247	7.3473e-120	0.571659	1.1398e-38
CL12534.Contig2_All	15.81	9.76	22	29.76	13.17	18.65	30.42	25.63	28.7	8.24	23.37	10.59	0.377916	7.81684e-25	0.843192	6.98013e-136	-0.165874	1.49389e-05	0.465276	3.08963e-48	-0.54379	2.19135e-47	-1.00907	4.7717e-184
CL12568.Contig5_All	10.08	11.39	9.41	17.39	22.16	20.87	12.14	15.93	15.99	3.38	7.46	6.41	0.970394	2.74129e-190	0.521599	2.95157e-48	-0.834134	8.54203e-77	-0.448796	7.87778e-50	-1.80453	0	-1.35573	4.24856e-238
CL12603.Contig1_All	11.37	20.29	9.57	32.02	24.24	21.25	13.35	22.33	23.6	5.01	8.97	9.38	0.91451	5.42801e-142	0.536163	6.13586e-44	-0.810245	9.30084e-63	-0.378347	1.46657e-30	-1.72475	0	-1.34641	1.71643e-203
CL12608.Contig4_All	9.28	10.7	7.71	20.57	26.37	24.53	14.22	14.24	27.09	5.82	7.49	8.16	1.37131	6.45842e-198	1.01562	1.49791e-96	-0.356284	3.22303e-09	-0.355691	1.72507e-20	-1.72759	9.85998e-279	-1.3719	2.02452e-155
CL12621.Contig2_All	12.24	5.92	12.26	5.69	10.93	5.94	10.62	10.89	9.13	15.32	18.89	16.7	-0.427899	2.37721e-16	0.0220461	0.179164	0.751536	1.34325e-69	0.449945	6.54132e-18	1.17944	6.42454e-146	0.72949	7.21834e-66
CL12648.Contig1_All	15.16	18.52	12.07	25.73	29.63	22.83	24.6	24.5	24.73	8.85	11.21	14.04	0.77755	2.17928e-82	0.704441	4.32006e-66	-0.41143	5.8647e-17	-0.0731089	0.0136415	-1.18898	1.76507e-166	-1.11587	2.04263e-142
CL12659.Contig2_All	13.85	17.82	13.81	15.63	29.94	30.98	6.34	18.01	17.05	11.8	6.49	6.22	0.752581	8.30796e-112	-0.121866	0.000737321	-0.885539	1.05433e-88	-0.874447	1.83108e-143	-1.63812	0	-0.763673	1.71513e-63
CL12672.Contig4_All	11.3	10.24	9.65	20.49	15.2	16.2	16.16	20.43	22.17	5.07	11.72	11.85	0.738111	1.50545e-73	0.924417	1.75781e-121	-0.114013	0.00466518	0.186306	4.36884e-08	-0.852124	1.32858e-94	-1.03843	9.90906e-148
CL12707.Contig1_All	13.84	13.49	15.29	31.31	27.7	17.99	32.19	31.81	26.64	8.34	11.46	20.87	0.860406	1.3453e-68	1.10852	2.88567e-122	-0.0476994	0.100123	0.248117	6.05049e-10	-0.908105	8.98547e-76	-1.15622	2.24589e-131
CL12712.Contig53_All	10.92	15.17	12.11	18.83	22.44	17.1	6.48	13.15	17.55	4.28	11.69	8.29	0.615427	2.70881e-43	-0.0243983	0.173253	-0.644665	1.68454e-31	-0.639825	5.05378e-46	-1.26009	5.24791e-142	-0.620267	6.42909e-29
CL12727.Contig15_All	6.68	11.55	7.75	16.96	12.06	11.88	22.99	14.25	16.16	3.92	6.12	9.18	0.659419	1.51983e-37	1.04952	4.61201e-105	-0.422168	4.84105e-12	0.390099	9.9676e-20	-1.08159	1.1862e-85	-1.47169	3.78786e-178
CL12731.Contig1_All	24.01	14.56	16.72	10.08	15.65	13.17	4.62	9.37	9.76	4.6	10.29	8.15	-0.504516	8.27068e-35	-1.20499	5.87394e-149	-1.2538	6.42059e-160	-0.700478	1.84347e-43	-0.749287	1.46421e-49	-0.048809	0.102363
CL12748.Contig120_All	17.23	14.63	12.02	10.55	12.68	11.09	5.48	10.38	9.82	3.57	7.9	8.42	-0.351887	1.72543e-21	-0.76106	2.72868e-81	-1.13434	1.8975e-158	-0.409172	3.94186e-22	-0.782448	4.24955e-68	-0.373275	7.35384e-15
CL12772.Contig4_All	27.04	31.66	15.95	28.55	34.59	33.18	10.65	19.64	24.54	9.78	15.41	20.11	0.371278	7.51023e-30	-0.430948	2.54194e-30	-0.708356	1.93859e-72	-0.802226	7.17455e-114	-1.07963	1.51824e-188	-0.277408	3.63063e-11
CL12801.Contig1_All	17.49	17.6	12.13	25.43	31.71	30.62	20.61	19.6	29.61	10.1	15.55	16.12	0.899115	7.21769e-92	0.580065	2.79041e-35	-0.162047	0.000747648	-0.31905	1.2444e-15	-1.06116	1.97459e-121	-0.742112	7.14676e-54
CL12806.Contig1_All	21.56	16.01	37.36	25.24	12.49	16.46	30.85	21.51	30.41	20	44.77	54.15	-0.459921	4.25559e-23	0.161752	5.09837e-05	0.686039	1.2132e-72	0.621673	1.1527e-42	1.14596	1.7753e-170	0.524287	2.18744e-45
CL12820.Contig1_All	34	48.32	31.73	99.6	44.08	39.95	66.41	51.81	58.9	15.49	24.09	7.33	0.694431	1.51875e-116	0.652234	3.12982e-101	-1.27175	1.01537e-197	-0.0421974	0.0363636	-1.96618	0	-1.92398	0
CL1286.Contig9_All	8.28	8.58	10.29	13.88	6.18	5.15	26.35	11.7	16.12	11.14	20.89	27.47	-0.10124	0.0148103	1.00185	2.62653e-126	1.14133	5.28678e-173	1.10309	2.87898e-147	1.24257	6.04658e-198	0.13948	1.94392e-05
CL12875.Contig4_All	32.32	36.35	25.41	54.93	95.42	54.67	18.64	36.63	53.41	10.46	26.45	16.65	1.12754	0	0.221974	1.11271e-13	-0.803143	1.3984e-111	-0.905568	5.09552e-293	-1.93069	0	-1.02512	3.92227e-194
CL12877.Contig2_All	53.96	69.19	56.61	43.48	39.93	38.21	44.74	39.54	42.04	67.85	99.62	100.92	-0.55777	6.05616e-78	-0.491152	4.91094e-62	0.593647	3.43959e-131	0.0666175	0.0134105	1.15142	0	1.0848	0
CL1288.Contig3_All	10.95	13.88	7.3	29.52	14.52	12.54	5.4	8.83	15.86	3.66	6.28	12.2	0.822402	8.06621e-71	-0.0817651	0.0421479	-0.522976	1.53408e-19	-0.904167	1.84519e-82	-1.34538	4.00439e-157	-0.44121	5.0224e-14
CL12888.Contig3_All	31.07	34.78	32.04	58.15	98.99	53.76	36.28	50.22	55.8	19.8	22.11	20.53	1.10887	0	0.548541	4.62877e-157	-0.643152	2.4284e-144	-0.560331	2.13965e-239	-1.75202	0	-1.19169	0
CL12888.Contig4_All	23.54	25.59	24.1	32.91	69.32	43.63	21.85	33.42	30.49	15.15	16.9	20.33	0.995312	0	0.238368	5.64093e-20	-0.476307	6.12956e-59	-0.756944	8.3675e-260	-1.47162	0	-0.714674	8.8373e-141
CL1289.Contig2_All	5.3	10.52	6.76	15.64	12.52	9.08	22.02	14.21	12.84	11.89	18.38	21.16	0.72453	3.40486e-62	1.12488	1.464e-168	1.19387	5.55953e-196	0.400348	6.51419e-29	0.469335	9.77404e-41	0.0689877	0.0111398
CL129.Contig3_All	23.67	28.83	24.71	39.12	46.7	35.95	19.4	35.44	32.73	17.23	20.62	21.18	0.66195	1.1826e-89	0.198702	1.55617e-08	-0.375384	9.17587e-22	-0.463248	1.18235e-47	-1.03733	1.15419e-192	-0.574086	2.39733e-51
CL12952.Contig3_All	7.28	10.78	6.93	23.89	22.54	11.82	10.98	13.95	15.58	6.21	8.78	7.94	1.22469	2.20466e-222	0.706502	6.49485e-63	-0.117412	0.00468446	-0.518189	5.96944e-52	-1.3421	8.01531e-258	-0.823914	5.0341e-82
CL1296.Contig1_All	132.8	62.23	157.56	26.43	11.96	12.62	13.12	13.23	10.82	50.27	127.35	135.47	-2.78373	0	-3.23596	0	-0.162844	3.06319e-33	-0.452236	3.39226e-33	2.62088	0	3.07312	0
CL1297.Contig1_All	35.26	24.55	67.87	23.49	12.99	16.01	24.73	22.65	37.76	39.19	31.22	65.42	-1.27863	0	-0.577647	1.19033e-132	0.0981745	1.06208e-06	0.700982	2.97037e-125	1.3768	0	0.675822	4.39115e-188
CL12980.Contig3_All	12.83	15.14	9.68	15.04	17.34	19.95	3.27	9.94	11.23	1.68	3.91	3.2	0.476782	2.15982e-46	-0.612315	4.66355e-52	-2.09311	0	-1.0891	4.65075e-189	-2.5699	0	-1.4808	7.92441e-145
CL12984.Contig3_All	5.36	5.03	6.98	5.18	4.57	8.36	33.72	28.99	18.99	22.66	6.11	15.89	0.0636524	0.110334	2.24872	0	1.37373	9.05256e-114	2.18506	0	1.31008	3.55692e-106	-0.874988	2.1227e-100
CL12985.Contig3_All	38.22	15.23	32.24	87.63	45.26	35.7	79.39	74.44	98.29	18.02	36.2	24.5	0.983448	1.48464e-218	1.5726	0	-0.109589	0.0011657	0.589155	3.23316e-135	-1.09304	2.80491e-261	-1.68219	0
CL12994.Contig3_All	13.67	22.72	15.29	42.99	31.43	27.56	36.41	38.22	29.68	5.91	12.9	20.65	0.988778	2.39112e-89	1.03841	1.00862e-99	-0.363923	2.27127e-09	0.0496294	0.0662845	-1.3527	2.08796e-147	-1.40233	4.60444e-160
CL13004.Contig2_All	36.26	23.69	42.41	17.46	14.3	13.07	5.18	9.94	11.76	15.45	57.01	53.06	-1.18817	0	-1.91971	0	0.300072	1.03726e-53	-0.73154	2.85974e-95	1.48824	0	2.21978	0
CL13027.Contig2_All	29.18	38.68	27.58	17.01	11.95	10.2	36.29	18.1	19.33	29.02	47.63	81.68	-1.27959	2.51213e-215	-0.361004	4.1154e-25	0.745413	7.66408e-149	0.918581	2.47529e-98	2.025	0	1.10642	1.53853e-286
CL13119.Contig6_All	25.87	45.11	15.66	15.07	50.95	38.04	5.39	11.76	13.73	7.41	5.5	6.37	0.26476	2.69131e-27	-1.47692	0	-2.16147	0	-1.74168	0	-2.42623	0	-0.684549	6.2629e-46
CL13121.Contig11_All	205.39	123.12	268.09	203.12	106.99	137.71	358.51	244.45	246.33	244.59	433.25	413.27	-0.409691	0	0.516258	0	0.878056	0	0.925949	0	1.28775	0	0.361797	0
CL13121.Contig18_All	26.2	17.47	37.89	27.7	16.94	24.11	44.22	37.82	42.22	33.44	55.62	49.63	-0.2427	5.18298e-17	0.61598	6.12699e-133	0.773408	3.28077e-222	0.858679	9.06774e-236	1.01611	0	0.157428	3.84426e-13
CL13133.Contig7_All	22.17	14.94	13.43	11.54	13.34	15.4	4.31	9.07	10.62	6.26	19.81	24.24	-0.321662	4.89529e-09	-1.0533	1.53972e-61	0.0129111	0.184815	-0.731633	1.48748e-27	0.334573	5.16153e-10	1.06621	1.25784e-63
CL13137.Contig2_All	63.97	48.49	97.04	13.56	8.71	19.25	2.09	7.45	8.5	32.02	75.59	36.36	-2.33381	0	-3.52892	0	-0.541023	0	-1.19511	0	1.79279	0	2.98789	0
CL13137.Contig5_All	82.71	70.46	91.76	31.87	10.71	25.32	5.19	15.2	14.91	34.76	68.52	66.01	-1.84753	0	-2.78584	0	-0.530344	0	-0.938304	0	1.31719	0	2.25549	0
CL1314.Contig21_All	38.56	20.66	26.33	25.47	19.95	33.75	6.1	21.87	21.69	8.19	19.05	7.5	-0.108844	1.23189e-05	-0.771039	2.76875e-154	-1.29589	0	-0.662195	7.30857e-110	-1.18704	7.27804e-295	-0.524847	3.73856e-47
CL13141.Contig1_All	67.8	28.13	82.07	34.19	15.48	13.82	9.29	18.99	21.4	49.23	69.99	72.55	-1.48103	0	-1.82593	0	0.118426	2.23602e-08	-0.344905	2.03976e-18	1.59945	0	1.94436	0
CL13141.Contig2_All	24.27	16.1	32.19	16.74	8.99	10.48	8.76	12.5	12.21	13.68	31.3	26.84	-0.998087	3.21307e-155	-1.10375	4.05357e-182	-0.00613451	0.192926	-0.105666	0.00712429	0.991952	3.47874e-154	1.09762	1.23083e-180
CL1316.Contig3_All	63.42	26.21	53.24	26.13	27.17	13.2	16.31	35.96	28.82	31.4	46.22	38.39	-1.09929	0	-0.803452	1.84369e-247	-0.293362	2.53482e-41	0.295838	1.59404e-24	0.805927	2.3863e-205	0.51009	1.15494e-91
CL13168.Contig1_All	6.66	6.31	5.18	17.01	11.98	9.2	17.41	11.43	13.04	4.67	9.9	8.4	1.08004	1.60561e-46	1.22523	4.08007e-62	0.356858	1.0988e-05	0.145185	0.00610558	-0.723185	5.26139e-25	-0.86837	2.55386e-36
CL1317.Contig10_All	77.3	40.27	97.62	26.48	30.15	32.8	18.97	69.03	44.71	47.05	94.01	49.46	-1.26529	0	-0.683724	0	-0.172463	7.85578e-34	0.581569	8.15798e-196	1.09283	0	0.51126	2.63268e-222
CL1317.Contig17_All	161.86	168.27	288.87	260.51	117.9	89.18	555.08	324.02	344.99	399.25	661.82	650.44	-0.398363	7.75039e-223	0.993523	0	1.47761	0	1.39189	0	1.87597	0	0.484083	0
CL1317.Contig19_All	43.89	18.28	54.16	16.71	13.94	22.23	14.83	32.46	23.13	23.24	42.03	25.58	-1.13566	0	-0.714151	0	-0.354208	2.10583e-93	0.42151	4.02305e-78	0.781453	1.03991e-302	0.359943	2.49977e-75
CL1317.Contig3_All	13.19	9.88	9.75	19.22	22.56	22.17	7.68	13.23	25.79	4.1	12.56	8.97	0.96518	4.62343e-140	0.51822	7.58825e-36	-0.349506	1.75608e-13	-0.44696	4.1971e-37	-1.31469	1.12223e-230	-0.867726	9.27701e-87
CL1317.Contig48_All	90.25	40.65	112.1	41.76	32.83	46.79	89.56	80.68	77.23	54.2	88.04	62.9	-0.996042	0	0.0428815	0.0164959	-0.231735	9.80283e-25	1.03892	0	0.764306	8.22603e-178	-0.274617	3.01454e-34
CL13185.Contig8_All	27.74	13.89	27.44	10.77	12.07	14.59	8.55	11.63	12.63	11.58	21.88	14.98	-0.882079	5.64959e-234	-1.06611	0	-0.507884	5.82361e-90	-0.184028	9.07798e-09	0.374195	2.08779e-37	0.558223	4.45295e-75
CL13192.Contig2_All	10.55	11.33	14.28	26.96	18.28	21.83	13.75	21.71	24.34	2.13	5.36	3.22	0.89514	1.27107e-117	0.737859	4.4421e-76	-1.74841	1.10642e-179	-0.157281	2.12697e-06	-2.64355	0	-2.48627	0
CL13195.Contig1_All	35.04	30.36	35.34	21.1	27.61	42.2	25.21	18.07	9.6	4.45	8.03	7.05	-0.144651	9.44857e-06	-0.914244	3.34973e-122	-2.35394	0	-0.769593	9.35755e-83	-2.20928	0	-1.43969	1.5563e-134
CL1321.Contig1_All	13.29	23.72	20.44	32.16	16.6	30.77	5.55	21.11	12.46	7.19	12.39	17.1	0.474497	2.96394e-31	-0.532041	7.59617e-28	-0.631862	1.11379e-37	-1.00654	2.47957e-111	-1.10636	2.2131e-131	-0.0998201	0.0192751
CL13216.Contig1_All	5.87	10.85	3.65	14.37	26.83	21.12	8.81	12.36	16.74	1.97	3.62	3.2	1.61657	6.21387e-199	0.910645	1.30722e-50	-1.20142	3.95885e-43	-0.705926	4.83661e-53	-2.818	0	-2.11207	7.7257e-176
CL13249.Contig3_All	16.93	28.06	10.4	21.63	45.02	30.58	11.03	20.69	33.85	7.02	9.02	12.02	0.814328	2.74544e-126	0.255584	6.71495e-12	-0.970232	1.26611e-97	-0.558744	1.7591e-65	-1.78456	0	-1.22582	3.44047e-168
CL13279.Contig5_All	18.24	19.67	23.56	18.98	15.98	16.44	23.22	23.16	20.2	30.8	42.05	49.43	-0.253631	1.57822e-10	0.128575	0.000273244	1.00358	1.98348e-213	0.382206	2.3755e-22	1.25721	3.7501e-306	0.875007	2.70216e-169
CL13282.Contig4_All	23.86	31.21	34.32	44.48	32.65	41.65	43.12	57.11	54.63	16.34	28.22	23.22	0.412654	1.12108e-83	0.801388	0	-0.394392	9.19166e-59	0.388734	3.22089e-97	-0.807046	6.47634e-277	-1.19578	0
CL13301.Contig2_All	7.06	9.14	7.27	13.87	11.38	8.72	30.33	21.59	21.15	4.62	11.08	10.05	0.538341	4.68e-24	1.64928	0	0.143753	0.00357437	1.11094	1.49098e-168	-0.394588	8.66185e-15	-1.50552	7.74079e-271
CL13301.Contig5_All	14.08	20.3	12.48	34.16	25.08	21.76	32.46	35.53	31.89	6.13	11.52	13.31	0.793841	1.93249e-114	1.10355	1.69381e-243	-0.588186	1.9597e-40	0.309707	7.95091e-27	-1.38203	3.39051e-282	-1.69173	0
CL13302.Contig1_All	5.2	8.3	3.55	39.31	42.84	33.73	23.37	34.6	42.67	0.97	2.64	1.53	2.76975	0	2.57774	0	-1.71757	1.91653e-53	-0.192013	3.35979e-09	-4.48733	0	-4.29531	0
CL13314.Contig5_All	13.73	10.01	10.92	12.39	16.49	17.42	3.14	11.39	7.98	4.19	6.76	7.34	0.419658	2.06179e-30	-0.608021	1.06555e-43	-0.914866	6.66241e-88	-1.02768	6.22403e-140	-1.33452	7.66021e-214	-0.306845	1.09994e-09
CL13319.Contig1_All	21.55	48.42	16.61	34.29	74.23	80.13	182.83	72.35	141.48	17.59	19.72	18.44	1.12635	0	2.2057	0	-0.624119	4.78683e-58	1.07935	0	-1.75047	0	-2.82982	0
CL13319.Contig2_All	224.18	163.87	202.43	411.1	491.32	466.58	204.22	332.75	391.27	97.01	167.04	128.19	1.21805	0	0.66973	0	-0.57754	0	-0.548316	0	-1.79559	0	-1.24727	0
CL13320.Contig7_All	31.9	21.1	13.33	12.55	23.05	20.75	28.97	25.33	17.63	11.3	4.53	9.38	-0.23463	6.42427e-33	0.121735	2.8854e-11	-1.39034	0	0.356365	3.31308e-76	-1.15571	0	-1.51208	0
CL1338.Contig12_All	34.31	22.19	35.29	16.57	16.06	25.08	8.26	28.56	19.62	12.9	19.07	13.63	-0.667245	9.65479e-137	-0.687055	1.91884e-143	-1.0039	2.38555e-275	-0.0198094	0.136549	-0.336653	1.3896e-26	-0.316844	2.95239e-23
CL1338.Contig13_All	131.53	98.01	222.82	83.37	45.47	47.52	136.62	90.48	95.24	126.36	114.35	116.53	-1.35424	0	-0.480809	2.13734e-282	-0.332957	1.07459e-144	0.873436	0	1.02129	0	0.147851	1.27148e-25
CL1338.Contig17_All	5.87	6.6	9.09	13.41	6.52	4.64	21.15	12.47	12.76	9.91	16.78	17.06	0.194684	0.000332003	1.11383	4.05302e-111	1.03024	1.51691e-93	0.919143	2.95084e-81	0.835553	1.14469e-66	-0.0835906	0.0132219
CL1338.Contig23_All	8.97	12.02	16.21	10.19	5.34	7.73	12.99	10.74	16.12	12.25	25.09	22.6	-0.671389	1.5367e-27	0.113559	0.0124842	0.702091	2.07408e-47	0.784948	3.65213e-38	1.37348	3.95121e-140	0.588532	5.41978e-35
CL1338.Contig4_All	26.68	40.85	51.8	56.58	28.38	28.67	106.76	69.4	76.44	61.26	113.39	122.47	-0.0645945	0.00862499	1.09401	0	1.32864	0	1.15861	0	1.39324	0	0.234631	7.54448e-36
CL13432.Contig9_All	10.31	16.78	8.65	20.75	18.63	16.65	6.18	13.46	15.28	6.1	10.82	8.13	0.653398	3.82784e-43	-0.017417	0.201282	-0.50199	2.28634e-18	-0.670815	7.13547e-45	-1.15539	2.3599e-111	-0.484573	4.70005e-17
CL13433.Contig4_All	27.17	45.95	21.89	58.76	60.36	65.33	27.12	37.67	63.21	16.57	29.58	30.58	0.963918	3.19527e-153	0.451855	1.35053e-29	-0.287281	1.11438e-10	-0.512062	1.69001e-51	-1.2512	2.24696e-234	-0.739137	1.98922e-69
CL13450.Contig2_All	9.72	6.47	8.92	17.9	13.99	10.95	14.38	17.72	19.59	5.21	4.03	2.14	0.774326	5.32695e-73	1.05142	6.95868e-146	-1.13788	1.35585e-81	0.277094	6.77763e-15	-1.91221	1.36765e-296	-2.1893	0
CL13462.Contig2_All	9.95	16.16	5.07	27.39	18.58	18.04	9.8	9.01	18.02	3.82	5.29	8.93	1.04243	3.45023e-105	0.251393	2.39101e-06	-0.775391	1.46095e-32	-0.791036	2.11412e-66	-1.81782	7.65662e-244	-1.02678	3.16348e-60
CL13468.Contig1_All	41.58	74.36	69.73	23.02	16.12	31.48	9.69	11.96	9.2	4.51	8.11	11.31	-1.38972	0	-2.57039	0	-2.93874	0	-1.18067	4.47283e-117	-1.54903	1.04938e-178	-0.368352	1.7773e-08
CL13512.Contig3_All	11.81	13.65	8.44	12.04	17.44	14.94	9.5	12.84	11.67	4.29	7.63	9.45	0.39125	2.68065e-32	0.0133905	0.192171	-0.659655	2.07002e-62	-0.377859	3.18118e-30	-1.05091	4.83272e-178	-0.673046	7.02693e-65
CL13571.Contig2_All	28.04	36.44	27.17	12.31	15.23	21.8	17.75	14.07	8.11	7.85	14.09	11.8	-0.891452	6.67078e-204	-1.19039	0	-1.43466	0	-0.298939	8.52864e-17	-0.54321	4.61783e-48	-0.24427	3.26687e-10
CL13586.Contig1_All	24.19	23.71	30.14	14.68	15.8	15.83	9.31	13.61	15.33	22.37	41.39	44.36	-0.749892	5.65163e-111	-1.01743	1.89547e-184	0.479187	1.56954e-70	-0.267539	1.50172e-11	1.22908	0	1.49662	0
CL13586.Contig2_All	2.04	4.3	3.13	10.73	4.93	3.97	29.9	15.41	14.71	16.8	28.54	26.21	1.05627	2.81505e-51	2.67013	0	2.9248	0	1.61386	5.79764e-292	1.86853	0	0.254667	8.87394e-16
CL1360.Contig1_All	25.5	5.59	21.31	25.63	7.9	24.56	44.29	66.62	32.91	16.47	14.64	18.3	0.152881	1.17211e-07	1.4684	0	-0.078157	0.00336125	1.31552	0	-0.231038	3.27341e-15	-1.54655	0
CL13622.Contig1_All	30.87	49.69	23.47	43.04	103.91	48.46	37.68	48.78	46.4	16.08	14.7	20.11	0.913248	2.23556e-255	0.368301	7.7729e-36	-1.01975	1.61263e-164	-0.544947	8.92982e-104	-1.933	0	-1.38805	0
CL13630.Contig1_All	24.82	18.07	18.65	21.78	20.17	19.82	7.52	13.32	16.08	5.92	10.06	6	0.00841024	0.198158	-0.726411	9.1176e-89	-1.47979	1.75991e-282	-0.734821	7.40721e-91	-1.4882	1.16372e-286	-0.753382	3.93882e-58
CL1365.Contig6_All	12.55	8.95	10.51	13.02	15.53	15.62	15.9	16.22	14	3.72	7.34	6.02	0.466812	6.26047e-34	0.535757	5.50662e-45	-0.899606	1.46341e-76	0.0689447	0.0160487	-1.36642	1.09396e-204	-1.43536	6.39337e-230
CL13677.Contig1_All	43.83	34.8	68.81	53.63	24.73	40.42	77.78	61.87	72.69	82.8	109.45	104.28	-0.306834	5.50127e-35	0.537096	1.61833e-137	1.01772	0	0.84393	9.11635e-303	1.32456	0	0.480625	3.02519e-157
CL13684.Contig1_All	13.35	10.8	13.37	20.46	8.73	9	31.58	21.16	29.41	17.09	39.2	42.68	0.0311171	0.126059	1.13868	3.06883e-225	1.40907	0	1.10757	4.27847e-215	1.37796	0	0.270393	1.65737e-22
CL1370.Contig2_All	46.54	29.56	39.83	12.52	21.97	24.89	3.35	5.52	5.69	10.04	18.93	7.26	-0.963394	1.7715e-270	-2.98101	0	-1.67331	0	-2.01762	0	-0.709916	2.96284e-84	1.3077	9.75059e-140
CL13719.Contig2_All	21.84	12.58	22.41	4.35	11.11	13.91	7.17	8.67	10.12	4.36	17.75	12.75	-0.951345	6.49271e-142	-1.1211	1.04232e-184	-0.698481	8.69673e-85	-0.169755	8.70452e-05	0.252864	5.90639e-10	0.42262	2.21372e-22
CL13765.Contig1_All	11.59	9.95	11.8	19.83	18.69	21.21	11.82	22.52	18.88	2.04	3.73	5.2	0.84335	1.27632e-153	0.685354	2.1444e-96	-1.59641	8.46656e-237	-0.157996	1.52211e-08	-2.43976	0	-2.28176	0
CL13765.Contig2_All	5.82	7.81	6.58	24.7	25.52	28.95	14.99	28.08	28.1	0.3	0.6	0.96	1.97051	0	1.82272	0	-3.43374	0	-0.147785	8.2075e-20	-5.40425	0	-5.25647	0
CL1380.Contig2_All	7.62	9.46	8.23	35.76	10.01	25.12	35.34	35.91	77.19	1.94	5.01	5.62	1.49016	0	2.55668	0	-1.00334	3.47574e-101	1.06652	0	-2.4935	0	-3.56003	0
CL13842.Contig2_All	8.28	11.15	5.05	14.75	19.08	17.37	10.32	13.54	16.3	3.46	6.53	5.4	1.06593	1.12693e-156	0.723237	6.72572e-65	-0.662716	5.52947e-35	-0.34269	2.74272e-22	-1.72864	0	-1.38595	5.92833e-187
CL13877.Contig7_All	19.46	36.54	21.5	72.32	49.14	46.54	36.48	44.67	45.64	10.22	21.37	36.38	1.12289	1.77462e-220	0.730321	3.10252e-82	-0.168301	5.23527e-05	-0.392569	4.84226e-36	-1.29119	2.3943e-276	-0.898622	2.77778e-117
CL13891.Contig3_All	4.15	4.11	8.51	14.45	12.23	6.68	21.39	14.29	11.13	3.89	13.79	15.02	0.999784	1.03357e-41	1.49905	4.3043e-108	0.981509	2.44101e-40	0.499263	1.7841e-18	-0.0182747	0.119911	-0.517537	8.89424e-20
CL139.Contig24_All	260.99	322.34	347.57	91.52	90.55	160.96	32.55	64.16	88.26	200.11	342.42	291.06	-1.43449	0	-2.30918	0	-0.140806	4.43413e-26	-0.87469	1.62487e-266	1.29368	0	2.16837	0
CL13934.Contig49_All	254.65	297.4	407.29	143.5	68.56	68.19	129.38	99.6	67.53	299.47	362.04	410.32	-1.77132	0	-1.68852	0	0.165264	1.61297e-145	0.0828032	5.54537e-12	1.93659	0	1.85378	0
CL1395.Contig7_All	24.03	27.6	20.1	15.44	30.69	26.27	5.28	18.26	13.65	5.78	7.68	16.5	0.0137008	0.141127	-0.935601	7.36868e-285	-1.25284	0	-0.949302	3.97228e-294	-1.26654	0	-0.317239	4.70605e-23
CL1399.Contig2_All	8.18	18.62	8.11	12.85	20.21	12.79	12.47	15.13	17.25	2.59	4.39	7.57	0.395572	1.38001e-21	0.371957	4.29465e-19	-1.25275	2.33514e-114	-0.0236152	0.144182	-1.64832	1.72476e-225	-1.62471	2.83738e-216
CL14007.Contig39_All	57.16	48.14	61.65	118.2	86.64	88.85	96.28	120.44	118.98	16.59	23.39	24.46	0.81857	0	1.01785	0	-1.36623	0	0.199278	1.86008e-47	-2.1848	0	-2.38407	0
CL14020.Contig1_All	20.63	21.71	20.15	11.67	15.18	13.37	4.08	11.55	7.08	6.05	9.76	10.68	-0.632903	2.95247e-63	-1.44342	1.52016e-242	-1.22907	1.64311e-191	-0.810518	1.3821e-62	-0.596171	5.23031e-38	0.214348	2.57254e-05
CL14047.Contig1_All	72.06	50.44	102.16	26.89	12.18	23.03	22.14	31.34	28.92	74.06	112.19	90.59	-1.85115	0	-1.43616	0	0.307914	4.77925e-87	0.414994	8.22402e-46	2.15906	0	1.74407	0
CL14073.Contig2_All	10.46	18.08	7.34	15.6	26.22	20.01	6.27	15.4	16.49	5.11	7.58	5.62	0.789964	4.21865e-52	0.108642	0.0215233	-0.95753	1.81192e-42	-0.681323	1.87659e-40	-1.74749	9.1541e-180	-1.06617	7.51756e-54
CL1408.Contig1_All	10.18	13.65	8.46	13.6	16.31	12.15	11.13	12.46	11.58	4.4	8.48	7.68	0.384217	3.11231e-21	0.132746	0.000753488	-0.643262	3.38775e-40	-0.25147	1.75247e-10	-1.02748	9.98168e-114	-0.776008	6.0439e-60
CL1408.Contig2_All	7.96	16.05	7.41	15.98	19.68	12.5	10.05	11.44	9.21	5.21	9.11	8.32	0.619438	6.3912e-41	-0.0207809	0.188196	-0.463097	4.94419e-17	-0.640219	4.66457e-43	-1.08254	1.91568e-104	-0.442316	1.62285e-15
CL14093.Contig20_All	88.07	45.57	103.84	56.14	19	34.35	62.58	59.72	66.57	55.86	118.59	93.73	-1.111	0	-0.317134	5.50937e-51	0.186491	2.33223e-22	0.793864	3.4314e-211	1.29749	0	0.503624	8.50747e-135
CL14099.Contig1_All	8.93	10.35	7.8	16.3	23.32	15.74	8.23	8.95	14.63	4.41	7.45	8.65	1.03414	3.34799e-123	0.242138	7.71138e-07	-0.391038	1.42528e-12	-0.792005	8.21474e-79	-1.42518	1.25038e-204	-0.633176	4.00992e-32
CL141.Contig33_All	11.28	20.82	12.12	111.8	74.35	78.18	61.39	121.83	129.55	8.56	15.75	20.07	2.58373	0	2.83488	0	0.0148131	0.163767	0.25115	2.46589e-60	-2.56891	0	-2.82006	0
CL1413.Contig17_All	16.07	29.23	42.8	10.3	19	13.7	17.59	29.33	9.92	14.11	26.31	17.18	-1.031	8.42066e-151	-0.612863	1.86551e-62	-0.602946	2.49818e-61	0.418135	1.5225e-21	0.428053	3.81409e-23	0.00991784	0.192428
CL14188.Contig2_All	13.47	18.16	11.71	25.89	26.33	24.79	10.87	14.11	17.02	5.19	12.25	11.92	0.834698	3.23932e-74	-0.0281964	0.166179	-0.546777	2.71612e-21	-0.862894	5.00714e-78	-1.38147	3.27101e-167	-0.518581	4.55756e-19
CL14188.Contig3_All	7.71	10.71	7.49	14.7	15.52	15.37	8.46	10.85	11.3	3.91	8.83	7.54	0.819797	4.35984e-46	0.256764	2.45264e-05	-0.340191	5.14887e-07	-0.563033	1.54244e-24	-1.15999	2.15696e-81	-0.596956	4.38791e-19
CL1419.Contig5_All	34.66	18.35	29.11	27.62	23.31	24.9	5.3	14.13	11.52	6.66	17.76	8.34	-0.112577	9.30996e-09	-1.39676	0	-1.32323	0	-1.28419	0	-1.21065	0	0.0735358	0.00604011
CL14191.Contig4_All	15.89	12.08	15.9	14.75	15.64	19.58	5.4	19.2	14.91	3.13	9.7	7.49	0.189179	2.10637e-15	-0.139857	2.1137e-08	-1.10669	8.9094e-300	-0.329036	1.14487e-40	-1.29587	0	-0.966836	1.54545e-217
CL14195.Contig1_All	38.71	57.59	52.66	19.79	14.24	15.92	8.68	9.07	12.96	29.61	40.11	64.47	-1.56956	0	-2.25918	0	-0.131405	9.89584e-06	-0.689614	4.69364e-31	1.43816	6.70486e-271	2.12777	0
CL14209.Contig2_All	26.07	29.66	28.97	15.82	13.74	11.78	13.08	12.49	13.12	23.49	30.5	40.1	-1.02999	3.03415e-130	-1.11572	1.20416e-147	0.165195	6.53082e-07	-0.0857291	0.0298352	1.19518	2.61752e-186	1.28091	1.98268e-206
CL14227.Contig1_All	12.74	28.99	19.42	6.1	6.23	10.38	10.53	10.22	6.67	10.73	26.75	16.69	-1.42566	3.82589e-166	-1.14167	1.07765e-117	-0.164169	3.00187e-05	0.283984	3.61805e-06	1.26149	2.341e-124	0.977503	1.7429e-82
CL14259.Contig1_All	12.39	11.51	9.16	20.78	22.02	20.32	12.92	21.25	19.68	1.89	5.05	4.21	0.935056	1.42914e-296	0.71197	2.16002e-159	-1.56518	0	-0.223086	3.53975e-23	-2.50024	0	-2.27715	0
CL14266.Contig3_All	14.94	15.1	17.16	40.36	31.53	28.53	44.38	45.31	38.36	1.7	6.32	6.58	1.09273	6.51162e-295	1.44936	0	-1.68347	4.05167e-269	0.356634	4.43985e-53	-2.7762	0	-3.13283	0
CL14273.Contig10_All	0.49	0.82	0.31	8.74	12.63	11.7	26.2	36.27	58.53	0.24	0.69	0.41	4.35014	0	6.22646	0	-0.273691	0.0233699	1.87632	0	-4.62383	0	-6.50015	0
CL14273.Contig17_All	0.5	0.29	0.4	10.62	11.42	8.21	66.03	27.96	55.22	0.6	1.5	1.18	4.67233	0	6.97303	0	1.47205	7.5568e-29	2.30069	0	-3.20028	0	-5.50097	0
CL14312.Contig1_All	4.35	5.02	7.41	7.92	7.45	9.78	32.42	13.73	18.33	10.24	9.14	10.23	0.587721	9.08912e-19	1.95133	2.70399e-300	0.829386	9.10498e-39	1.36361	4.35605e-180	0.241665	6.42539e-06	-1.12195	6.23367e-134
CL1432.Contig10_All	14.3	16.5	12.7	20.28	30	28.56	12.16	22.26	16.33	7.48	13.03	11.46	0.860309	2.81459e-129	0.236934	1.38617e-09	-0.435511	6.79831e-23	-0.623375	4.70715e-74	-1.29582	3.02536e-252	-0.672445	6.88994e-56
CL14324.Contig4_All	15.12	13.59	20.74	12.41	14.03	22.84	14.27	11.25	7.87	6.31	8.72	7.48	-0.000694052	0.240336	-0.54991	4.33251e-25	-1.12239	4.79355e-82	-0.549216	5.6354e-25	-1.1217	3.36192e-82	-0.57248	4.68516e-19
CL14349.Contig1_All	7.9	9.52	7.01	15.39	15.55	11.37	8.67	11.66	14.23	4.27	8.14	7.9	0.795187	1.69723e-84	0.50924	1.91507e-32	-0.259691	4.74197e-08	-0.285946	1.57797e-14	-1.05488	6.52251e-136	-0.768931	5.91706e-66
CL14350.Contig3_All	28.54	23.69	27.76	37.44	31.58	35.11	10.11	27.03	25.68	5.49	13.73	11.92	0.384879	1.34316e-34	-0.332193	8.14188e-21	-1.35004	3.07847e-224	-0.717072	1.18437e-102	-1.73492	0	-1.01784	5.37736e-114
CL14383.Contig7_All	9.33	24.27	11.93	25.65	19.69	11.8	24.8	24.64	23.45	6.67	7.28	11.96	0.331832	1.11233e-20	0.688341	3.25101e-93	-0.80382	7.12695e-77	0.356509	2.81313e-29	-1.13565	4.5683e-170	-1.49216	0
CL1439.Contig19_All	18.86	8.85	18.45	10.49	8.89	9.38	9.75	8.04	8.26	5.33	8.59	5.92	-0.679358	7.75554e-69	-0.817407	5.02764e-94	-1.21338	1.15699e-180	-0.138049	0.000793305	-0.534024	1.49883e-29	-0.395975	3.57189e-16
CL1439.Contig6_All	20.88	8.26	32.63	10.37	6.88	6.58	2.75	9.22	6.96	6.34	7.07	4.19	-1.37051	3.9575e-299	-1.69314	0	-1.80719	0	-0.322631	6.10737e-11	-0.436678	2.13056e-18	-0.114047	0.0102671
CL1444.Contig5_All	29.35	16.23	25.45	8.8	25.48	23.75	2.26	4.86	3.23	6.54	10.68	3.32	-0.291353	4.07427e-31	-2.76623	0	-1.78713	0	-2.47488	0	-1.49577	0	0.979102	1.81693e-77
CL14445.Contig2_All	15.5	9.25	20.87	10.79	8.07	8.94	3.7	6.76	7.33	13.24	24.94	23.47	-0.712575	1.74874e-204	-1.35211	0	0.436745	7.06788e-116	-0.63954	2.15048e-103	1.14932	0	1.78886	0
CL1445.Contig17_All	13.44	8.47	16.26	12.29	6.71	8.42	6.95	15.84	9.16	16.39	23.14	19.49	-0.47193	1.59469e-18	-0.237265	2.3833e-06	0.63965	3.36556e-47	0.234665	1.42855e-05	1.11158	2.75667e-118	0.876916	6.27455e-80
CL14450.Contig74_All	26.95	23.09	6.72	34.1	8.14	29.41	30.15	41.63	43.12	11.7	18.77	28.63	0.340968	5.33265e-28	1.02848	3.62174e-303	0.0680222	0.0106011	0.687513	5.5276e-153	-0.272946	1.89453e-19	-0.960459	3.36849e-272
CL14474.Contig1_All	64.14	31.08	102.03	36.01	18.72	39.94	17.78	41.85	27.03	48.12	86.63	47.45	-1.05351	2.64385e-296	-1.16541	0	-0.10306	8.35964e-06	-0.111908	0.000581047	0.950447	1.37105e-234	1.06235	3.15309e-280
CL14484.Contig2_All	9.79	12.31	8.39	16.69	20.13	18.83	11.52	12.02	15.26	6.47	6.49	9.69	0.87003	8.02125e-126	0.355478	4.22648e-19	-0.42215	1.08006e-20	-0.514552	1.32993e-50	-1.29218	7.96415e-240	-0.777628	1.45313e-73
CL14498.Contig1_All	18.68	36.08	13.95	28.18	26.52	37.31	66.45	153.09	66.7	17.73	23.73	15.3	0.42497	7.5472e-33	2.07891	0	-0.266346	1.46242e-11	1.65394	0	-0.691317	1.94621e-77	-2.34526	0
CL14535.Contig1_All	6.2	8.71	8.47	26.98	13.03	18.26	26.76	18.94	24.25	3.57	7.84	9.93	1.32347	2.35155e-117	1.59649	4.18545e-186	-0.114263	0.0325028	0.273023	2.44718e-10	-1.43773	5.87397e-134	-1.71075	3.01469e-206
CL14535.Contig2_All	5.01	7.58	6.56	17.12	9.65	9.6	21.54	14.51	19.93	2.38	5.1	7.58	0.932226	6.077e-46	1.56198	1.87493e-155	-0.329518	1.92677e-05	0.62975	3.08745e-36	-1.26174	1.08617e-74	-1.89149	7.47981e-204
CL14537.Contig7_All	14.3	16.84	20.6	26.59	29.69	20.93	16.83	18.69	26.27	6.62	13.51	14.66	0.582153	1.41144e-52	0.268976	1.60695e-11	-0.560508	8.90603e-34	-0.313177	6.98909e-18	-1.14266	3.93966e-164	-0.829484	4.11145e-78
CL14556.Contig5_All	10.25	8.39	8.87	31.6	15.41	14.24	5.1	7.05	7.98	3.1	7.52	5.61	1.16127	1.13223e-112	-0.434883	9.72083e-11	-0.748978	7.50042e-26	-1.59615	4.23744e-181	-1.91025	6.80479e-235	-0.314094	1.93143e-05
CL14562.Contig3_All	9.45	18.63	10.41	23.35	20.81	16.14	29.87	22.67	18.75	5.99	6.92	12.57	0.651712	4.59643e-56	0.899978	3.21445e-114	-0.582804	2.25006e-30	0.248266	1.54996e-12	-1.23452	3.83942e-162	-1.48278	1.58428e-252
CL14594.Contig43_All	18.94	15.4	24.7	24.74	11.73	7.55	6.46	10.61	15.26	29.88	51.1	15.23	-0.41855	1.71653e-55	-0.861593	2.22989e-196	0.706091	7.02166e-229	-0.443043	3.41577e-46	1.12464	0	1.56768	0
CL14609.Contig4_All	8.06	16.76	8.14	16.18	27.75	11.34	30.21	20.89	52.43	23.25	7.07	15.09	0.748995	3.09927e-63	1.65954	0	0.471242	3.83796e-24	0.910542	2.10583e-162	-0.277753	3.65871e-12	-1.18829	5.05097e-252
CL14614.Contig1_All	19.66	13.08	33.23	27.78	16.19	36.57	6.22	22.45	17.35	5.17	6.2	3.59	0.289748	7.76893e-41	-0.507657	2.32202e-92	-2.1385	0	-0.797405	1.44534e-248	-2.42825	0	-1.63084	0
CL14614.Contig10_All	25.8	37.29	65.94	57.11	70.09	92.26	76.76	89.89	80.72	31.95	16.02	40.62	0.766927	0	0.946069	0	-0.535924	2.63574e-161	0.179142	3.21056e-40	-1.30285	0	-1.48199	0
CL14617.Contig10_All	358.8	517.39	672.08	336.2	243.06	239.92	70.31	224.5	218.85	381.82	515.72	531.48	-0.914289	0	-1.57693	0	-0.106902	7.37518e-53	-0.662643	0	0.807387	0	1.47003	0
CL14617.Contig15_All	166.13	291.46	183.9	154.91	187.32	154.68	64.78	143.75	85.89	74.53	138.4	147.92	-0.365125	1.82562e-208	-1.10707	0	-0.819973	0	-0.741942	0	-0.454847	8.67132e-245	0.287095	2.78874e-76
CL14617.Contig24_All	377.9	486.74	683.22	331.06	273.71	240.69	109.04	257.47	224.17	327.08	433.61	493.66	-0.8694	0	-1.37756	0	-0.296407	0	-0.508155	0	0.572993	0	1.08115	0
CL14617.Contig26_All	192.24	145.97	264.37	87.23	87.17	104.98	27.84	78.24	59.68	91.96	111.32	157.04	-1.10665	0	-1.84876	0	-0.734314	0	-0.742116	0	0.372334	2.99669e-185	1.11445	0
CL14617.Contig3_All	146.01	139.88	239.23	84.11	85.54	86.29	20.17	69.24	63.83	76.9	98.52	107.63	-1.0338	0	-1.76212	0	-0.883243	0	-0.728318	0	0.150558	4.76095e-22	0.878876	0
CL14617.Contig30_All	792.98	1097.92	979.82	668.6	527.76	302.57	289.54	413.1	340.78	890.53	1336.61	1123.77	-0.933683	0	-1.44951	0	0.22924	0	-0.515826	0	1.16292	0	1.67875	0
CL1462.Contig14_All	415.59	253.74	650.76	359.06	161.01	226.76	429.88	468.43	416	541.05	906.95	814.62	-0.818929	0	-0.00251994	0.143738	0.779208	0	0.816409	0	1.59814	0	0.781728	0
CL14644.Contig1_All	18.16	25.21	10.97	17.95	29.95	36.79	10.64	15.2	25.31	4.09	8.51	9.67	0.644176	4.90016e-50	-0.0709053	0.0474415	-1.27094	4.20316e-99	-0.715082	1.79647e-59	-1.91511	3.81486e-278	-1.20003	4.54491e-86
CL14661.Contig8_All	8.7	11.57	4.58	10.57	6.97	10.9	23	14.47	17.74	5.18	12.11	16.58	0.199091	0.000248762	1.16182	5.04546e-123	0.45912	6.73129e-17	0.962733	8.83506e-91	0.260029	2.97031e-07	-0.702704	4.312e-54
CL14680.Contig9_All	40.24	36.6	30.32	23.01	27.26	19.75	14.98	35.74	30.95	11.23	23.62	17.48	-0.612254	5.13229e-197	-0.381346	1.51657e-83	-1.03	0	0.230908	5.10126e-26	-0.417746	4.24805e-66	-0.648654	3.41887e-168
CL14773.Contig6_All	15.06	14.9	22.6	15.52	8.78	10.86	6.31	12.26	10.61	15.43	24.26	26.99	-0.575575	3.32732e-48	-0.836036	5.99314e-91	0.351926	5.51858e-26	-0.260462	6.71921e-09	0.927501	5.09578e-139	1.18796	2.93143e-206
CL14785.Contig12_All	20.5	22.98	14.71	23.04	25.24	26.58	16.87	30.71	28.91	10.17	9.7	10.59	0.364755	7.07473e-74	0.402528	1.86308e-90	-0.929995	6.42926e-303	0.0377734	0.0143395	-1.29475	0	-1.33252	0
CL1479.Contig8_All	15.94	16.29	22.03	24.29	16.79	8.82	37.3	23.46	24.52	22.15	45.56	53.19	-0.115968	0.000661045	0.660418	1.24176e-92	1.1655	0	0.776386	3.75804e-122	1.28147	0	0.505081	8.47657e-82
CL14793.Contig1_All	5.76	7.6	7.7	12.83	12.71	12.28	17.2	14.38	18.98	5.35	6.15	7.96	0.848249	4.26482e-50	1.27477	7.63085e-128	-0.102427	0.0340448	0.426526	9.99312e-21	-0.950675	4.81331e-61	-1.3772	1.61743e-144
CL14804.Contig1_All	17.18	13.82	26.48	15.15	25.46	19.6	5.03	17.9	13.28	5.4	7.38	7.68	0.0709647	0.0259514	-0.647364	3.92683e-44	-1.47886	6.16524e-169	-0.718328	4.40248e-55	-1.54983	3.72133e-190	-0.831501	7.04393e-44
CL14812.Contig6_All	57.77	90.71	97.97	67.62	53.7	56.93	52.89	53.67	87.93	54.64	32.15	33.41	-0.465335	8.22447e-279	-0.337297	2.19427e-153	-1.03225	0	0.128038	2.21044e-20	-0.566919	4.20208e-291	-0.694957	0
CL14829.Contig1_All	18.81	19.82	17.8	29.92	21.76	22.76	18.33	24.98	28.21	7.09	14.37	14.18	0.403636	1.22027e-32	0.353592	5.37474e-25	-0.653737	3.05541e-58	-0.0500441	0.0359497	-1.05737	1.11589e-171	-1.00733	1.76159e-152
CL14861.Contig5_All	32.5	30.66	16.63	20.89	19.88	10.74	7.08	5.78	13.61	8.8	17.37	30.24	-0.626436	2.95357e-65	-1.58238	8.32321e-292	-0.486763	2.33884e-42	-0.955945	9.84164e-87	0.139672	9.95022e-05	1.09562	8.92804e-120
CL14861.Contig7_All	24.5	25.71	30.3	11.97	28.09	21.45	4.91	13.64	9.82	15.48	23.95	17.24	-0.383518	1.05026e-19	-1.48317	9.76576e-184	-0.493357	1.54833e-30	-1.09965	3.86148e-89	-0.109839	0.00326542	0.989812	1.91835e-70
CL14863.Contig1_All	23.66	23.54	16.9	42.01	37.55	32.84	22.27	26.96	29.76	10.33	21.11	22.17	0.81603	1.48959e-94	0.319715	8.79952e-14	-0.24158	1.4729e-07	-0.496314	6.11381e-40	-1.05761	2.99901e-146	-0.561295	6.61372e-36
CL14900.Contig8_All	45.64	47.35	48.73	54.59	51.38	35.06	75.91	74.02	87.4	74.28	117.26	152.47	-0.00477537	0.192361	0.749195	0	1.2849	0	0.75397	0	1.28968	0	0.535707	0
CL14938.Contig1_All	35.77	78.64	32.79	68.69	112.62	59.95	28.45	79.02	36.2	26.84	17.83	24.23	0.718464	9.35821e-166	-0.0108782	0.194293	-1.08147	4.3152e-202	-0.729342	2.89483e-169	-1.79993	0	-1.07059	1.57577e-196
CL1495.Contig4_All	137.68	50.59	69.07	22.29	23.81	32.35	19.33	35.86	25.55	41.71	110.18	110.99	-1.71124	0	-1.65991	0	0.0380355	0.0018726	0.0513265	0.0133094	1.74927	0	1.69794	0
CL1495.Contig6_All	1682.05	671.31	1437.98	506.99	467.96	598.43	350.72	684.62	697.33	850.31	1535.07	1212.66	-1.26587	0	-1.1178	0	-0.0687258	2.84002e-67	0.148069	2.90186e-136	1.19714	0	1.04907	0
CL14956.Contig14_All	58.97	78.21	78.03	111.91	73.2	57.93	204.32	91.86	150.15	107.67	155.99	239.37	0.178107	3.23202e-66	1.05137	0	1.22929	0	0.873262	0	1.05119	0	0.177923	2.43114e-135
CL14974.Contig19_All	13.42	13.24	5.46	13.83	19.81	13.5	10.23	9.61	13.7	4.05	6.87	6.42	0.556498	4.95159e-39	0.0714577	0.0399222	-0.881163	6.63936e-59	-0.48504	1.20138e-30	-1.43766	3.50542e-186	-0.95262	7.24173e-70
CL14977.Contig1_All	502.81	338.72	775.4	521.78	268.45	275.23	315.42	540.5	566.17	491.32	817.68	988.68	-0.596431	0	-0.171832	3.03008e-128	0.517418	0	0.424599	0	1.11385	0	0.68925	0
CL14977.Contig2_All	280.07	131.62	388.73	203.89	89.67	94.51	45.1	120.71	122.34	148.36	213.82	227.89	-1.03708	0	-1.45432	0	-0.425343	2.40747e-238	-0.417242	9.84893e-112	0.611734	0	1.02898	0
CL14980.Contig2_All	13.84	13.29	9.28	15.31	9.6	11.32	17.74	11.29	15.25	18.8	28.63	31.83	-0.0017093	0.23751	0.294823	6.66623e-09	1.13509	1.05271e-143	0.296532	5.62989e-09	1.1368	2.71173e-144	0.840267	1.46139e-87
CL15005.Contig1_All	8.57	10.29	9.05	21.44	12.67	14.72	10.36	14.74	17.06	1.61	1.21	1.52	0.811276	4.02138e-75	0.606808	6.49767e-40	-2.67667	1.21339e-241	-0.204468	1.55566e-07	-3.48795	0	-3.28348	0
CL15018.Contig3_All	15.59	17.58	17.5	18.98	13.93	14.59	47.58	18.72	20.65	21.95	34.72	38.12	-0.0896112	0.00289982	0.782324	2.91989e-159	0.910904	4.19724e-227	0.871936	4.3031e-191	1.00052	1.76519e-265	0.128579	1.00227e-07
CL15019.Contig1_All	42.86	22.87	24.8	26.56	51.98	50.1	13	33.19	24.7	7.26	12.22	10.4	0.508645	6.40034e-111	-0.338754	8.69607e-38	-1.5919	0	-0.847399	5.63123e-270	-2.10055	0	-1.25315	7.0916e-287
CL15028.Contig1_All	129.92	103.04	194.36	180.03	164.14	245.13	80.95	294.12	292.1	34.49	58.21	36.85	0.465831	0	0.65544	0	-1.71708	0	0.189609	6.78976e-96	-2.18291	0	-2.37252	0
CL15028.Contig2_All	83.52	90.36	137.71	272.51	104.81	156.62	83.77	171.52	221.71	46.75	49.43	46.6	0.78159	0	0.62465	0	-1.11981	0	-0.156939	2.7653e-50	-1.9014	0	-1.74446	0
CL15028.Contig3_All	57.2	38.57	25.02	50.45	56.67	52.83	84.48	125.06	115.31	19.92	39	44.23	0.408008	4.40603e-94	1.43804	0	-0.219857	1.31482e-23	1.03003	0	-0.627865	8.27836e-206	-1.65789	0
CL15028.Contig4_All	88.87	60.31	52.94	100.67	94.38	92.7	152.62	207.99	219.99	36.84	62.77	72.42	0.51314	1.78142e-209	1.53368	0	-0.22343	1.39066e-32	1.02055	0	-0.73657	0	-1.75712	0
CL15040.Contig2_All	77.35	113.48	49.75	40.26	114.69	133.69	29.76	62.73	37.1	23.91	39.99	29.18	0.263382	1.26374e-69	-0.87859	0	-1.36372	0	-1.14197	0	-1.6271	0	-0.485133	1.47667e-98
CL1505.Contig26_All	21.04	33.13	14.35	8.49	18.27	9.8	4.88	5.1	8.9	6.82	11.39	15.58	-0.905694	2.58728e-198	-1.85342	0	-1.01283	5.08668e-240	-0.947721	2.37268e-114	-0.107133	0.000581829	0.840588	9.59238e-88
CL1506.Contig6_All	7	11.06	6.36	16.43	20.29	12.54	13.44	11.2	18.24	5.41	10.43	13.55	1.01522	6.21597e-125	0.820057	1.22359e-76	0.276167	5.37224e-09	-0.195164	7.81916e-08	-0.739054	2.25864e-74	-0.54389	2.87472e-38
CL1507.Contig16_All	20.11	37.44	27.05	14.27	8.23	7.61	6.09	7.99	7.47	14.36	27.14	34.66	-1.48481	3.39524e-227	-1.9561	0	-0.137268	6.14144e-05	-0.471291	2.68191e-13	1.34754	4.44176e-180	1.81884	3.27302e-276
CL15078.Contig3_All	34.47	14.86	34.17	39.38	57.68	48.5	66.07	55.37	47.51	11.34	28.28	18.05	0.803591	2.13425e-301	1.02411	0	-0.528512	5.90335e-84	0.220521	8.48567e-34	-1.3321	0	-1.55262	0
CL15078.Contig4_All	25.46	31.37	25.73	37.35	55.45	53.69	60.87	53.63	57.58	11.67	12.57	17.32	0.828613	0	1.06627	0	-0.983134	5.5381e-255	0.237656	1.86531e-41	-1.81175	0	-2.0494	0
CL15083.Contig5_All	33.81	25.08	50.19	11.6	5.71	7.86	15.77	12.57	12.99	58.34	114.98	111.86	-2.11228	0	-1.39589	0	1.39064	0	0.716393	2.64674e-106	3.50292	0	2.78653	0
CL15084.Contig5_All	19.97	14.26	13.61	20.68	19.19	23.49	5.74	17.45	17.89	6.71	11.83	9.01	0.407357	1.84972e-56	-0.208876	2.11591e-13	-0.792451	3.84724e-139	-0.616233	1.54925e-117	-1.19981	0	-0.583575	8.51626e-71
CL151.Contig52_All	9.9	7.83	15.18	6.18	2.7	3.24	3.55	3.97	4.03	16.05	37.38	31.87	-1.43783	3.26036e-267	-1.50615	2.55618e-285	1.3775	0	-0.0683208	0.0591033	2.81533	0	2.88365	0
CL151.Contig8_All	11.28	13.69	14.12	11.82	6.57	4.17	10.33	6.06	6.37	17.47	50.8	56.64	-0.787796	1.61197e-59	-0.773318	1.60168e-57	1.68578	0	0.0144787	0.198657	2.47358	0	2.4591	0
CL15106.Contig3_All	7.83	7.01	6.95	16.19	14.25	11.7	16.94	12.48	13.17	3.41	6.22	10.32	0.953909	2.38895e-178	0.970154	7.3515e-185	-0.121115	0.000876455	0.0162448	0.148651	-1.07502	2.5713e-218	-1.09127	4.85659e-225
CL15110.Contig9_All	18.23	44.59	29.9	47.43	55.61	62.42	60.72	97.17	72.2	18.97	16.74	34.87	0.838704	8.49523e-225	1.32631	0	-0.381283	2.83258e-32	0.48761	1.76046e-120	-1.21999	0	-1.7076	0
CL15129.Contig1_All	23.97	29.89	17.59	21.85	62.97	49.68	10.85	16.12	19.69	9.45	13.47	17.31	0.913829	1.30193e-266	-0.603805	7.36794e-70	-0.819277	3.32841e-119	-1.51763	0	-1.73311	0	-0.215472	1.98742e-08
CL15160.Contig60_All	13.41	11.64	29.47	12.97	5.5	7.29	11.61	8.3	11.83	19.06	30.14	49.86	-1.0775	3.76696e-187	-0.77532	5.51717e-108	0.869576	2.70772e-240	0.302176	6.46149e-13	1.94707	0	1.6449	0
CL15160.Contig74_All	13.02	9.34	15.94	12.38	5.23	5.11	18.89	12.45	13.56	25.25	31.87	29.31	-0.746767	1.96192e-40	0.241157	1.85682e-07	1.18481	7.27209e-193	0.987924	7.13605e-75	1.93158	0	0.943654	5.33393e-133
CL15175.Contig21_All	7.26	8.18	11.39	29.98	12.31	15.19	29.28	23.88	32.38	7.91	7.18	13.82	1.1036	3.2665e-237	1.67776	0	0.114754	0.00127242	0.574154	4.14229e-115	-0.98885	8.00116e-200	-1.563	0
CL15195.Contig2_All	23.85	32.77	19.88	101.83	57.64	43.42	46.63	36.37	60.79	17.27	35.43	45.63	1.41606	6.34319e-289	0.933425	6.307e-107	0.3869	5.24773e-17	-0.482635	1.28702e-47	-1.02916	2.00502e-176	-0.546526	2.871e-43
CL1522.Contig1_All	9.46	17.93	5.83	19.75	38.99	27.42	9.55	20.86	17.63	6.07	5.71	11.12	1.37743	1.48148e-264	0.547634	7.4011e-33	-0.525417	8.45857e-22	-0.829795	2.07892e-116	-1.90285	0	-1.07305	1.24346e-101
CL15271.Contig1_All	23.47	20.1	26.73	18.55	17.38	15.53	8.45	12.78	18.12	22.38	36.65	31.83	-0.445892	1.26014e-32	-0.824469	7.50635e-94	0.379816	7.64205e-32	-0.378577	1.96854e-18	0.825708	2.66648e-123	1.20429	4.57997e-227
CL153.Contig5_All	32.32	47.94	16.58	24.16	68.48	54.84	10.44	28.81	30.19	9.98	14.8	11.14	0.606915	2.72672e-261	-0.469221	3.31466e-108	-1.4267	0	-1.07614	0	-2.03362	0	-0.957481	1.56228e-273
CL15316.Contig8_All	22.94	35.83	37.78	15.6	7.54	18.92	26.05	40.06	22.26	76.41	54.95	81.92	-1.19546	0	-0.114459	6.68073e-06	1.15143	0	1.081	3.53514e-244	2.34689	0	1.26588	0
CL15324.Contig9_All	5.3	2.05	3.86	27.92	15.26	22.15	16.8	25.65	25.31	0.65	0.91	0.63	2.54849	0	2.60832	0	-2.35403	1.71912e-101	0.0598281	0.0152753	-4.90252	0	-4.96235	0
CL15335.Contig6_All	27.6	14.93	45.92	16.26	6.81	10.48	5.24	15.46	9.67	20.77	42.88	31.83	-1.39485	0	-1.52943	0	0.114159	1.83471e-08	-0.134575	6.27792e-05	1.50901	0	1.64359	0
CL15347.Contig4_All	72.98	33.37	89.46	6.95	2.41	2.92	1.52	3.44	2.72	58.82	70.8	74.9	-3.99011	0	-4.65909	0	0.0718996	7.13476e-05	-0.668986	1.90083e-14	4.06201	0	4.73099	0
CL15357.Contig8_All	17.56	10	22.16	12.52	8.9	9.13	14.39	13.17	12.21	16.74	27.37	26.71	-0.696237	7.96011e-37	-0.304799	1.77126e-09	0.524934	1.77376e-32	0.391437	9.7493e-12	1.22117	4.76398e-132	0.829734	2.98615e-70
CL15357.Contig9_All	18.63	11.89	23.01	10.79	6.66	9.83	7.14	8.43	10.4	16.69	24.25	23.91	-0.967082	1.70015e-69	-1.02737	2.19505e-76	0.290233	2.12724e-11	-0.06029	0.099123	1.25732	2.08619e-129	1.31761	3.54554e-138
CL15391.Contig3_All	3.11	7.36	2.65	8.57	5.92	3.14	19.66	15.03	17.57	10.49	27	29.51	0.430146	2.60294e-19	1.99767	0	2.3573	0	1.56752	0	1.92715	0	0.359634	1.64703e-49
CL15397.Contig1_All	73.57	49.04	79.71	55.48	63.29	61.76	48.92	55.18	36.88	23.46	24.02	19.6	-0.159595	9.12877e-12	-0.503928	2.63791e-89	-1.58163	0	-0.344332	2.18606e-40	-1.42204	0	-1.0777	2.08296e-234
CL15397.Contig2_All	14.75	18.43	10.91	6.91	20.96	19.19	7.07	12.28	6.2	1.41	3.87	5.31	0.0973272	0.0169275	-0.766369	3.0178e-39	-2.04172	3.50277e-174	-0.863697	7.2876e-51	-2.13905	1.01704e-197	-1.27535	3.52411e-53
CL15397.Contig3_All	15.87	31.6	11.4	9.08	19.05	18.4	13.27	17.87	8.89	3.42	9.37	8.81	-0.337015	1.94253e-15	-0.539291	3.66565e-34	-1.43497	2.84866e-171	-0.202276	7.75046e-06	-1.09795	2.26316e-90	-0.895679	2.32023e-56
CL1540.Contig8_All	31.72	47.98	22.5	40.69	59.31	48.02	38.11	48.68	43.97	10.82	18.83	35.3	0.537153	4.07636e-100	0.368041	3.3331e-45	-0.64151	1.28353e-95	-0.169112	7.53689e-13	-1.17866	0	-1.00955	1.17802e-264
CL15405.Contig2_All	9.88	11.56	6.94	11.76	14.44	13.16	11.85	15.34	12.33	4.07	6.33	9.15	0.472635	6.74594e-81	0.483978	8.33688e-85	-0.533592	1.97472e-73	0.0113431	0.160815	-1.00623	6.73983e-302	-1.01757	0
CL15411.Contig3_All	16.44	15.22	17.52	12.02	11.68	14.61	2.13	8.43	8.84	6.95	14.52	7	-0.356632	4.18903e-16	-1.32545	3.92162e-142	-0.78117	2.8376e-61	-0.968818	6.76822e-68	-0.424539	1.1112e-17	0.544279	5.04286e-20
CL15453.Contig2_All	13.17	15.09	9.45	16.06	23.56	22.97	8.23	12.9	11.87	4.17	7.28	7.15	0.734581	7.12118e-56	-0.176386	0.000524725	-1.00792	7.29625e-58	-0.910967	1.34423e-79	-1.7425	6.34342e-218	-0.83153	1.48693e-37
CL15463.Contig23_All	33.23	28.5	28.01	41.38	34.37	46.22	13.75	37.14	34.31	14.71	21.87	13.06	0.445212	4.51577e-120	-0.0637438	0.000931457	-0.850443	5.22049e-279	-0.508956	3.12042e-152	-1.29566	0	-0.786699	7.4445e-233
CL1547.Contig12_All	4.84	8.31	4.2	11.98	8.4	6.29	21.03	10.49	9.64	8.34	12.45	15.4	0.624616	5.33517e-33	1.25186	5.89102e-157	1.06905	5.20092e-109	0.627241	4.72014e-50	0.444433	3.51098e-25	-0.182807	1.13849e-06
CL1547.Contig18_All	4.18	8.46	7.71	19.49	12.4	8.68	25.33	19.6	16.6	9.63	13.01	17.78	1.00069	1.07124e-81	1.60687	2.45342e-255	1.00068	3.05317e-82	0.606178	1.07222e-52	-3.17585e-06	0.151849	-0.606181	4.17741e-53
CL15482.Contig6_All	9.5	8.51	17.39	7.91	7.51	5.28	8.24	7.26	7.73	13.89	24.38	26.58	-0.772872	3.06416e-124	-0.604245	6.97317e-81	0.877318	4.03885e-283	0.168627	1.65101e-06	1.65019	0	1.48156	0
CL15494.Contig1_All	8.8	10.08	9.21	14.66	13.71	13.18	17.58	16.85	15.82	3.07	7.88	11.22	0.569011	2.83155e-27	0.852519	1.3456e-64	-0.328088	3.9536e-08	0.283508	2.84588e-10	-0.897099	6.28024e-59	-1.18061	7.51116e-110
CL15501.Contig5_All	10.35	17.21	6.75	17.73	28.06	17.45	9.35	17.5	13.6	3.79	6.37	6.3	0.883483	9.15861e-231	0.247203	3.69521e-16	-1.05459	2.0114e-169	-0.636279	1.88044e-130	-1.93807	0	-1.30179	5.65091e-279
CL15523.Contig3_All	25.26	21.84	38.86	30.26	13.25	17.81	21.12	29.34	33.35	33.81	54.98	46.93	-0.483915	1.32135e-126	-0.0305112	0.0337094	0.66188	0	0.453404	1.23942e-109	1.1458	0	0.692391	0
CL15523.Contig6_All	66.58	73.06	93.98	45.08	36.55	17.37	142.32	71.99	71.74	139.46	195.37	210.12	-1.23232	0	0.304634	2.51944e-51	1.23488	0	1.53695	0	2.46719	0	0.930242	0
CL15523.Contig9_All	45.13	40.13	51.38	30.52	24.42	10.08	69.79	37.59	51.13	94.76	126.37	161.25	-1.06523	4.84173e-237	0.225421	2.99027e-18	1.49751	0	1.29065	0	2.56274	0	1.27209	0
CL15535.Contig1_All	10.02	24.89	10.14	32.54	28.48	23.18	25.12	36.45	37.71	5.34	9.61	17.88	0.906517	4.8306e-135	1.15319	5.15087e-236	-0.443326	5.31875e-22	0.246676	1.79645e-16	-1.34984	6.26898e-257	-1.59652	0
CL15562.Contig3_All	91.91	114.45	110.59	63.26	49.33	37.05	45.14	50.69	63.87	77.63	92.84	125.36	-1.07744	0	-0.975673	0	-0.0872719	2.44603e-07	0.101768	1.68381e-05	0.99017	0	0.888401	0
CL15569.Contig2_All	27.22	19.58	19.89	23.36	41.08	37.56	16.78	22.34	28.15	10.3	19.32	19.38	0.614645	3.12105e-129	0.0215333	0.12871	-0.437715	4.93341e-47	-0.593112	1.02277e-120	-1.05236	0	-0.459249	1.0707e-51
CL15578.Contig4_All	16.08	17.92	20.63	15.05	7.15	9.88	21.02	12.61	12.72	26.46	43.1	36.87	-0.764801	0	-0.237496	1.13883e-40	0.963993	0	0.527305	1.80726e-148	1.72879	0	1.20149	0
CL1558.Contig6_All	5.61	9.44	3.93	9.17	16.55	11.52	17.72	19.58	18.6	3.31	2.22	4.01	0.97311	2.4851e-133	1.56558	0	-0.986003	9.42312e-71	0.592471	3.21197e-85	-1.95911	0	-2.55158	0
CL15592.Contig1_All	19.12	23.3	17.27	20.3	13.99	13.78	45.7	21.72	21.91	28.76	34.2	47	-0.307674	6.71687e-15	0.590567	3.07453e-67	0.892362	2.84166e-169	0.89824	1.2742e-137	1.20004	3.14135e-274	0.301795	2.79976e-25
CL15594.Contig3_All	13.16	17.38	12.71	22.61	27.78	26.7	26.81	24.97	23.51	9.62	11.85	14.83	0.836144	1.04176e-150	0.808521	2.93876e-139	-0.24473	9.84144e-11	-0.027623	0.0897088	-1.08087	5.19301e-232	-1.05325	3.10522e-217
CL15598.Contig3_All	21.75	14.98	19.56	20.25	38.5	11.14	5.5	16.45	10.88	4.72	11.76	14.51	0.315596	1.21873e-19	-0.760811	8.7305e-73	-0.849764	1.62372e-88	-1.07641	4.75451e-160	-1.16536	6.5756e-184	-0.0889529	0.0199479
CL15605.Contig4_All	19.54	14.6	13.69	15.3	27.45	27.06	4.4	14.22	14.74	6	6.5	5.29	0.548741	8.52583e-41	-0.502601	1.79311e-24	-1.41758	3.16906e-134	-1.05134	2.2159e-121	-1.96632	0	-0.914983	5.50771e-48
CL15609.Contig4_All	46.04	29.01	65.29	38.72	21.5	31.37	46.38	54.75	49.01	46.61	80.69	63.79	-0.611211	4.37653e-125	0.1095	7.3316e-07	0.453771	1.00702e-100	0.720711	5.49628e-179	1.06498	0	0.344271	1.0619e-60
CL15631.Contig1_All	30.35	54.46	39.17	104.52	113.95	61.73	169.21	146.3	151.41	34.78	41.99	61.66	1.17954	0	1.92135	0	0.167697	5.82512e-15	0.741813	0	-1.01184	0	-1.75365	0
CL15631.Contig3_All	15.11	17.18	11.22	26.5	24.69	30.78	28.35	26.48	30.78	6.05	10.94	10.55	0.916672	2.67409e-175	0.985304	1.89675e-206	-0.651938	3.95748e-53	0.0686323	0.00442273	-1.56861	0	-1.63724	0
CL15662.Contig6_All	21	19.18	20.46	49.79	43.8	47.2	26.6	54.04	46.59	3.02	4.94	4.25	1.21844	0	1.08181	0	-2.30547	0	-0.136631	5.72864e-11	-3.5239	0	-3.38727	0
CL15669.Contig2_All	15.67	9.53	14.95	14.27	14.76	16.42	7.65	12.48	11.27	3.66	9.49	7.11	0.180503	7.13803e-10	-0.345747	2.58028e-26	-0.982299	7.97133e-162	-0.52625	4.76803e-62	-1.1628	1.01742e-240	-0.636551	3.55336e-61
CL1567.Contig84_All	18.71	9.77	25.01	8.04	6.01	14.83	7.38	21.3	19	17.06	28.84	17.61	-0.887116	2.32798e-149	-0.153935	1.63086e-07	0.251725	1.17031e-19	0.733181	7.93214e-97	1.13884	5.51978e-269	0.405661	2.50346e-45
CL15679.Contig31_All	7.59	22.73	22.35	83.05	48.54	48.23	129.47	112.33	96.54	33.85	43.41	57.57	1.77412	0	2.68767	0	1.36047	0	0.913547	0	-0.413645	1.11264e-173	-1.32719	0
CL15693.Contig1_All	12.75	26.3	19.8	27.62	25.87	27.14	65.1	33.58	34.29	15.27	20.91	36.33	0.461281	1.05305e-22	1.19565	4.53995e-182	0.3227	1.05159e-11	0.734372	2.18881e-81	-0.138581	0.000383407	-0.872953	8.61742e-110
CL1571.Contig15_All	243.86	182.94	304.81	91.81	77.17	101.24	45.9	97.35	72.96	180.46	261.89	195.65	-1.43409	0	-1.74563	0	-0.191534	6.66168e-97	-0.311536	4.87145e-90	1.24256	0	1.55409	0
CL1571.Contig4_All	37.48	32.83	46.04	14.85	12.69	12.61	20.22	13.45	16.65	44.37	38.64	76.96	-1.53314	0	-1.20766	0	0.464575	2.45149e-240	0.325478	6.59862e-40	1.99772	0	1.67224	0
CL15729.Contig2_All	9.81	11.74	14.98	11	20.59	20.69	3.53	8.42	7.19	4.02	4.89	3.93	0.518429	1.57604e-51	-0.919668	1.49559e-96	-1.50296	1.56307e-210	-1.4381	8.09138e-279	-2.02139	0	-0.583292	1.23732e-24
CL15759.Contig1_All	25.24	17.08	21.14	12.7	24.53	24.3	8.73	19.59	16.17	6.84	9.65	5.08	-0.0436493	0.0285013	-0.501045	5.19317e-71	-1.5525	0	-0.457395	1.75029e-58	-1.50885	0	-1.05146	1.02408e-180
CL15769.Contig8_All	9.12	7.43	7.65	10.73	22.66	20.12	8.87	22.81	11.05	7.15	6.68	5.93	1.14511	1.20913e-247	0.833648	2.52951e-118	-0.28759	2.10774e-11	-0.311465	5.75748e-26	-1.4327	0	-1.12124	1.30299e-193
CL15773.Contig2_All	14.86	12.55	11.84	26.35	20.01	19.98	9.17	15.89	11.65	4.15	9.21	5.64	0.760104	1.58881e-155	-0.086088	0.00359974	-1.04271	1.2798e-157	-0.846192	8.31614e-186	-1.80282	0	-0.956625	1.49965e-128
CL1579.Contig23_All	9.59	13.18	12.31	19.1	8.98	8.24	33.43	14.92	21.36	11.34	21.78	15.96	0.0577296	0.0979102	1.00685	1.2361e-80	0.499709	2.30404e-18	0.949119	4.16442e-73	0.441979	2.72754e-15	-0.50714	8.81748e-26
CL15796.Contig1_All	0.33	0.12	0.15	4.39	3.1	6.55	36.61	26.3	44.93	0.29	0.53	0.29	4.56498	1.18347e-191	7.51141	0	0.908499	0.000600281	2.94644	0	-3.65648	6.59201e-170	-6.60292	0
CL15796.Contig2_All	0.83	0.52	0.52	7.13	6.54	10.76	87.93	56.84	89.42	0.7	0.34	0.95	3.71569	0	6.98074	0	0.102711	0.137236	3.26504	0	-3.61298	2.67431e-307	-6.87803	0
CL15812.Contig20_All	15.02	14.78	12.12	14.05	10.81	14.34	25.7	20.84	20.61	23.76	31.64	34.57	-0.0941796	0.000964859	0.685452	1.96688e-139	1.10733	0	0.779632	7.8013e-174	1.20151	0	0.421882	9.97527e-79
CL15812.Contig40_All	17.08	9.5	14.76	7.71	8.18	16.18	6.88	15.92	13.41	4.88	7.71	7.43	-0.365058	1.71715e-36	-0.180946	7.09744e-11	-1.04225	1.02342e-226	0.184112	4.54385e-10	-0.677196	9.2491e-86	-0.861308	1.94353e-145
CL15821.Contig3_All	9.71	11.83	8.95	17.03	21.23	20.47	10.3	12.51	12.39	4.07	7.72	9.23	0.949584	2.14312e-84	0.222613	2.72383e-05	-0.523398	4.46871e-17	-0.726971	8.2037e-54	-1.47298	7.23525e-169	-0.746011	5.62777e-35
CL15837.Contig4_All	25.64	34.33	27.76	9.26	10.73	12.3	5.64	10.1	8.75	9.3	22.01	16.36	-1.43907	0	-1.82693	0	-0.871747	1.75167e-145	-0.387865	4.23885e-14	0.567319	4.05715e-39	0.955184	5.42603e-93
CL15837.Contig5_All	19.6	19.7	22.11	7.51	6.01	8.69	3.95	6.02	5.49	6.54	13	14.1	-1.46446	6.88831e-254	-1.97875	0	-0.859309	1.78635e-109	-0.514296	2.09656e-17	0.605149	2.60638e-34	1.11944	1.94322e-93
CL15842.Contig1_All	83.12	153.12	71.77	49.1	66.31	45.95	46.3	55.33	39.76	31.46	19.87	51.55	-0.92811	0	-1.10629	0	-1.56652	0	-0.178179	2.89605e-11	-0.638408	1.67749e-106	-0.460228	1.24972e-52
CL15862.Contig2_All	135.66	66.63	129.4	86.93	79.55	59.51	27.81	59.63	70.75	63.9	143.85	118.03	-0.548719	5.32183e-208	-1.0534	0	-0.0154214	0.0855555	-0.504686	3.39454e-122	0.533298	6.78692e-197	1.03798	0
CL1588.Contig14_All	13.85	8.58	11.04	10.76	17.31	14.77	7	12.15	10.3	4.34	7.13	6.59	0.357679	5.04762e-22	-0.173186	1.05088e-05	-0.8835	2.01255e-82	-0.530865	1.89574e-43	-1.24118	4.51375e-182	-0.710314	1.1138e-50
CL15908.Contig48_All	18.11	12.42	24.52	14.77	10.51	9.06	19.5	20.79	15.09	16.54	28.22	25.2	-0.676439	1.33148e-61	0.0203975	0.160473	0.35437	1.60209e-25	0.696836	2.29268e-65	1.03081	4.64487e-160	0.333973	6.6259e-23
CL15916.Contig19_All	13.78	6.55	12.35	5.37	7.09	4.03	11.63	15.83	20.65	11.63	19.96	15.31	-0.985031	3.45934e-112	0.565804	6.08162e-64	0.526009	2.41761e-55	1.55084	0	1.51104	0	-0.039795	0.0526664
CL15916.Contig45_All	23.73	34.51	36.4	31.45	13.53	14.57	56.43	37.52	41.97	53.48	54.06	73.21	-0.664424	1.08497e-238	0.524443	6.37878e-224	0.937863	0	1.18887	0	1.60229	0	0.41342	8.62189e-194
CL15922.Contig8_All	7.34	9.78	5.95	16.24	12.39	12.11	19.95	17.01	19.54	4.36	7.02	12.53	0.824969	1.45607e-50	1.30465	2.33008e-145	0.0658609	0.0746781	0.479683	1.34655e-27	-0.759108	1.16616e-44	-1.23879	6.84766e-135
CL15932.Contig2_All	23.49	34.02	23.09	67.97	37.61	39.86	33.82	43.33	49.68	8.97	20.91	24.7	0.857271	3.5328e-169	0.668959	6.01871e-97	-0.548354	3.27564e-44	-0.188312	5.80689e-12	-1.40563	0	-1.21731	8.59071e-264
CL15938.Contig3_All	34.46	53.74	59.04	18.4	17.81	20.98	8.05	17.95	18.59	36.2	60.33	80.48	-1.36204	0	-1.71282	0	0.272811	1.02884e-54	-0.350781	6.84483e-29	1.63485	0	1.98563	0
CL15938.Contig5_All	98.62	82.61	144.57	54.65	33.16	51.61	21.53	44.79	37.81	70.63	141.8	42.1	-1.22149	0	-1.63434	0	-0.353745	3.84465e-163	-0.412843	4.81958e-93	0.867747	0	1.28059	0
CL15938.Contig9_All	128.23	150.94	160.89	95.52	52.56	93.78	33.52	52.94	66.73	105.34	141.05	149.37	-0.860382	0	-1.51347	0	-0.146857	2.89223e-41	-0.653088	0	0.713525	0	1.36661	0
CL15948.Contig1_All	12.26	10.21	14.47	21.5	19.05	21.68	15.59	17.97	12.8	6.62	12.1	10.46	0.758172	2.65499e-49	0.347478	1.89509e-10	-0.325259	6.2003e-08	-0.410694	1.7878e-17	-1.08343	2.71892e-89	-0.672737	6.74408e-31
CL1596.Contig11_All	27.88	7.01	27.3	7.37	4.54	9.33	5.67	8.96	7.48	7.84	19.2	13.5	-1.54769	0	-1.48385	0	-0.613823	1.36082e-123	0.0638407	0.0330439	0.933867	6.7016e-167	0.870026	1.78626e-147
CL15973.Contig2_All	4.61	6.43	8.38	32.79	24.15	28.25	9.62	5.51	6.03	3.87	7.46	11.24	2.13585	0	0.129316	0.00673585	0.225741	1.03167e-05	-2.00653	0	-1.91011	0	0.0964251	0.019694
CL15977.Contig4_All	21.43	17.41	27.51	65.36	46.45	46.63	60.57	71.62	68.13	9.92	17.98	18.57	1.25897	0	1.60255	0	-0.507692	3.14011e-65	0.343582	4.96003e-94	-1.76666	0	-2.11025	0
CL16026.Contig3_All	14.1	11.01	16.64	14.98	23.84	20.95	3.42	15.4	11.1	4.09	6.67	5.28	0.521432	2.7862e-33	-0.461281	2.73397e-19	-1.36977	3.16709e-115	-0.982713	1.65432e-96	-1.89121	5.02802e-261	-0.908493	3.53026e-44
CL16030.Contig2_All	59	34.77	27	17.92	19.41	19.08	40.91	31.33	25.09	30.83	35.25	84.19	-1.09479	0	-0.301835	4.63389e-33	0.327303	5.42286e-48	0.792955	4.73033e-149	1.42209	0	0.629137	1.28243e-154
CL16033.Contig5_All	20.86	15.24	28.68	15.77	8.39	11.03	22.6	17.12	16.99	23.77	37.79	43.37	-0.876854	1.21724e-235	-0.188058	1.93742e-15	0.70076	2.35893e-261	0.688796	3.14088e-136	1.57761	0	0.888819	0
CL16037.Contig1_All	23.29	29.21	16.95	25.96	62.24	53.81	14.01	31.33	33.85	8.09	13.65	13.34	1.03236	0	0.199728	1.07327e-15	-0.979382	2.00665e-225	-0.832636	0	-2.01175	0	-1.17911	0
CL16038.Contig10_All	46.29	87.7	46.69	4.05	2.52	5.22	0.7	2.11	2.06	8.76	15.63	29.45	-3.93458	0	-5.20244	0	-1.73994	0	-1.26786	1.4926e-78	2.19464	0	3.4625	0
CL16038.Contig15_All	157.94	124.39	210.09	50.96	16.3	29.2	27.66	28.73	32.52	41.03	102.81	99.92	-2.34755	0	-2.46364	0	-1.00957	0	-0.116094	5.02395e-09	1.33797	0	1.45407	0
CL16038.Contig21_All	140.04	212.58	97.47	8.69	12.15	18.51	3.62	8.97	12.65	15.77	17.67	39.97	-3.51514	0	-4.14718	0	-2.6086	0	-0.632041	2.28995e-73	0.906541	6.23372e-256	1.53858	0
CL16038.Contig24_All	175.08	102.65	152.18	5.22	2.07	4.37	0.21	0.78	0.66	16.1	29.16	19.74	-5.19955	0	-8.01959	0	-2.72192	0	-2.82003	8.76474e-212	2.47764	0	5.29767	0
CL16038.Contig30_All	64.55	58.79	74.91	134.87	93.94	71.24	21.62	37.32	43.81	17.64	35.98	48.58	0.601089	0	-0.939944	0	-0.949882	0	-1.54103	0	-1.55097	0	-0.00993777	0.14938
CL16038.Contig35_All	65.78	92.99	52.53	11.4	6.37	17.03	0.82	3.21	2.7	6.05	10.79	19.44	-2.59993	0	-4.96211	0	-2.53555	0	-2.36218	0	0.0643739	0.00678608	2.42656	0
CL16039.Contig15_All	24.82	19.19	28.48	18.48	15.31	17.15	15.43	22.43	23.3	29.41	55.86	39.77	-0.506255	5.94657e-72	-0.236093	1.54293e-18	0.791413	2.24581e-272	0.270163	3.78193e-20	1.29767	0	1.02751	0
CL1606.Contig1_All	37.87	20.79	44.86	21.52	13.08	12.89	34.06	20.76	19.1	33.84	54.94	69.53	-1.1197	9.49222e-299	-0.478501	2.94032e-69	0.621749	3.65832e-170	0.6412	8.73745e-84	1.74145	0	1.10025	0
CL16095.Contig17_All	7.73	14.21	9.41	13.14	15.81	25.79	3.48	14.97	10.24	4.12	6.8	4.41	0.804303	2.11131e-172	-0.115356	0.000271872	-1.02905	1.25393e-150	-0.91966	4.47861e-215	-1.83336	0	-0.913698	4.7713e-114
CL16095.Contig25_All	114.81	77.17	200.4	89.85	54.65	91.92	92.05	163.77	145.95	119.13	219.84	138.63	-0.728692	0	0.0426263	2.93497e-06	0.286277	3.08449e-223	0.771319	0	1.01497	0	0.24365	6.78581e-164
CL161.Contig2_All	1.66	2.59	3.2	30.21	23.8	20.58	70.3	47.41	50.1	0.82	2.07	3.03	3.33135	0	4.51122	0	-0.311288	0.00684518	1.17987	3.44399e-272	-3.64263	0	-4.82251	0
CL161.Contig8_All	1.55	3.19	3.09	20.02	14.96	22.93	37.52	34.94	47.2	0.91	1.17	2.04	2.88908	0	3.94089	0	-0.916163	1.39665e-20	1.05181	0	-3.80524	0	-4.85705	0
CL16101.Contig32_All	26.41	10.34	29.98	54.46	24.74	26.26	39.72	46.99	61.42	11.63	34.6	23.53	0.666034	1.98578e-113	1.16136	0	0.0724959	0.00763273	0.495331	1.21872e-93	-0.593538	1.42894e-93	-1.08887	0
CL16101.Contig33_All	40.57	13.63	49.52	51.15	27.1	38.12	38.55	58.13	68.51	14.36	33.66	19.04	0.170719	2.24633e-11	0.683645	7.40673e-184	-0.621785	1.69976e-98	0.512926	2.85664e-110	-0.792504	1.16861e-168	-1.30543	0
CL16101.Contig35_All	55.39	24.1	84.25	140.99	52.09	63.61	167.11	121.3	168.15	33.82	81.62	80.96	0.655419	8.59983e-200	1.49164	0	0.27532	1.04398e-32	0.836224	0	-0.380099	8.39875e-76	-1.21632	0
CL16127.Contig3_All	13.59	19.09	10.74	30.2	23.89	21.76	23.21	28.1	25.18	4.94	10.86	15.92	0.810897	6.50535e-65	0.836155	2.76543e-69	-0.434015	9.79155e-14	0.0252576	0.143158	-1.24491	7.38207e-131	-1.27017	1.76946e-136
CL16143.Contig14_All	7.03	14.59	7.07	14.87	14.54	11.09	15.68	12.67	13.23	3.24	6.43	6.29	0.501036	1.42689e-25	0.545907	2.36443e-30	-0.836138	9.89804e-44	0.0448715	0.0858389	-1.33717	2.21423e-129	-1.38204	2.36533e-139
CL16158.Contig29_All	15.26	18.55	24.67	21.18	7.25	10.38	38.89	27.96	27.56	39.27	48.76	62.61	-0.586169	3.42085e-58	0.698687	1.77848e-126	1.3735	0	1.28486	0	1.95967	0	0.674815	5.27308e-190
CL16172.Contig10_All	9.78	8.94	4.96	10.36	10.21	16.45	18.57	22.37	19.84	3.68	4.14	7.54	0.646401	5.73587e-77	1.3675	0	-0.61689	2.3774e-46	0.7211	2.45943e-151	-1.26329	2.4396e-235	-1.98439	0
CL16173.Contig11_All	12.31	12.99	8.49	26	18.25	17.12	15.35	15.11	16.14	4.24	7.2	11.56	0.867541	5.93716e-53	0.483536	1.06384e-15	-0.534278	6.30599e-14	-0.384004	1.26471e-13	-1.40182	9.48353e-114	-1.01781	3.80683e-53
CL16206.Contig6_All	15	18.72	9.48	29.19	28.37	14.92	29.08	24.46	25.76	5.51	9.48	15.49	0.749905	3.89198e-113	0.88445	1.38746e-163	-0.493433	1.99154e-33	0.134546	1.18647e-06	-1.24334	1.40528e-261	-1.37788	0
CL16207.Contig1_All	12.67	8.52	8.85	18.8	13.52	23.03	12.3	14.02	25.53	4.57	5.8	8.68	0.886126	4.50796e-73	0.79986	5.46857e-58	-0.643126	3.73832e-24	-0.0862661	0.014245	-1.52925	5.528e-173	-1.44299	6.72651e-149
CL16217.Contig1_All	11.21	15.83	18.69	15.59	25.02	7.41	9.72	12.35	6.75	5.55	8.67	6.12	0.080379	0.0526327	-0.639664	3.46261e-21	-1.15052	8.12718e-55	-0.720043	5.45965e-27	-1.2309	1.89829e-64	-0.510854	3.31348e-10
CL16228.Contig5_All	54.56	16.13	72.77	42.89	24.62	32.5	32.87	30.47	41.34	66.23	101.28	115.68	-0.515916	5.36676e-96	-0.444626	2.76245e-73	0.990875	0	0.0712901	0.00290606	1.50679	0	1.4355	0
CL16241.Contig1_All	20	13.08	29.36	16.04	8.47	12.08	5.22	8.69	9.94	19.03	20.49	5.89	-0.767166	4.05476e-113	-1.37846	7.47325e-292	-0.456955	3.90855e-46	-0.611294	2.10418e-45	0.310211	8.33971e-18	0.921505	6.14525e-113
CL16287.Contig6_All	34.25	30.19	44.68	55.2	50.85	56.25	34.19	87.61	65.35	31.4	19.88	12.03	0.579091	5.14661e-74	0.80143	9.29293e-151	-0.774718	3.39587e-83	0.222338	8.09091e-16	-1.35381	1.09208e-305	-1.57615	0
CL16331.Contig4_All	6.23	11.38	6.07	13.83	22.15	19.14	8.79	15.96	9.36	4.27	7.06	10.87	1.22526	3.169e-81	0.55148	1.56054e-14	-0.0721399	0.0915996	-0.673777	9.52653e-31	-1.2974	1.64992e-89	-0.62362	8.32484e-18
CL16360.Contig6_All	15.08	13.71	10.06	8.38	8.3	7.12	5.03	7.78	8.23	12.72	25.29	18.96	-0.705409	5.05195e-145	-0.878239	2.75388e-210	0.555032	6.81293e-140	-0.17283	3.96402e-08	1.26044	0	1.43327	0
CL1637.Contig2_All	16.02	16.78	15.22	11.08	16.05	16.33	3.02	6.93	7.66	7.31	9.94	5.74	-0.141154	0.000230631	-1.43338	5.76291e-172	-1.05549	5.69908e-108	-1.29223	3.28311e-133	-0.914337	5.73392e-78	0.37789	4.02162e-10
CL16383.Contig19_All	101.86	43.48	152.22	55.41	29.12	47.98	18.25	35.03	24.15	46.84	82.9	56.31	-1.16223	0	-1.92608	0	-0.668781	1.21364e-285	-0.763849	4.59555e-160	0.493449	2.37924e-105	1.2573	0
CL16399.Contig17_All	11.89	8.65	6.42	13.17	12.4	9.92	11.8	14.76	21.66	4.39	7.83	8.46	0.400075	3.96031e-25	0.846727	3.31859e-123	-0.376401	9.04773e-18	0.446652	1.56435e-40	-0.776476	1.355e-79	-1.22313	2.34927e-225
CL164.Contig17_All	16.75	7.43	12.55	6.39	5.93	7.7	6.49	7.54	10.06	13.39	19.66	9.58	-0.871567	1.45828e-49	-0.595432	2.80324e-26	0.223118	1.77313e-06	0.276135	1.12707e-05	1.09469	5.2134e-84	0.81855	5.19669e-52
CL164.Contig20_All	19.68	11.17	16.19	16.03	19.1	18.56	5.39	9.61	11.5	4.34	8.3	6.38	0.194862	2.49338e-06	-0.813181	4.19443e-57	-1.29627	8.42142e-122	-1.00804	1.61962e-92	-1.49113	6.55631e-172	-0.483085	2.09748e-14
CL164.Contig23_All	161.88	163.58	125.26	178.36	157.01	189.38	47.1	105.03	119.24	55.64	93.12	71.39	0.223155	2.04329e-64	-0.717519	0	-1.02473	0	-0.940674	0	-1.24788	0	-0.307209	5.4414e-62
CL1640.Contig2_All	9.54	12.81	21.35	18.44	26.81	25.91	6.88	11.89	21.52	4.6	4.92	4.87	0.707936	2.45634e-61	-0.102914	0.0129777	-1.59099	3.23081e-138	-0.810851	9.28436e-77	-2.29893	0	-1.48808	1.84244e-116
CL16420.Contig1_All	34.1	30.53	44.56	27.23	17.4	18.02	31.36	28.37	24.32	36.22	60.1	51.08	-0.795026	2.21375e-96	-0.360258	2.43534e-24	0.446821	4.10627e-48	0.434768	1.16201e-26	1.24185	3.85588e-273	0.807079	2.23565e-134
CL16429.Contig6_All	4.53	7.43	10.04	17.13	9.09	6.96	36.69	16.97	15.61	8.36	13.47	14.11	0.596985	8.39358e-47	1.65718	0	0.713095	4.21793e-69	1.06019	1.00386e-252	0.11611	0.000320787	-0.944084	2.64097e-210
CL16429.Contig7_All	11.5	10.32	15.16	9.44	15.97	10.44	10.52	25.08	12.81	2.45	3.15	3.43	-0.0444889	0.0352053	0.399821	1.75058e-52	-2.02824	0	0.44431	2.76603e-63	-1.98375	0	-2.42806	0
CL16446.Contig8_All	38.25	54.52	19.52	37.54	52.49	40.09	42.14	29.1	41.15	20.86	25.31	15.21	0.215275	5.27093e-20	0.00875404	0.195718	-0.865393	7.21175e-205	-0.206521	1.63899e-18	-1.08067	0	-0.874147	9.09298e-209
CL16472.Contig3_All	18.02	21.87	6.62	18.64	46.65	38.5	4.13	12.81	13.41	3.53	4.48	4.73	1.15866	0	-0.60428	4.33015e-66	-1.86154	0	-1.76294	0	-3.0202	0	-1.25726	1.46817e-148
CL16477.Contig3_All	11.4	19.49	9.59	26.67	21.66	21.71	6.46	14.54	15.46	2.98	7.06	7.52	0.796594	4.63817e-59	-0.131373	0.0082974	-1.18868	2.4875e-66	-0.927967	1.21902e-75	-1.98527	4.61305e-239	-1.05731	2.27449e-50
CL1648.Contig49_All	195.67	96.1	265.67	163.41	69.77	123.61	225.22	197.19	152.51	179.18	313.19	238.05	-0.640265	0	0.0499321	2.40018e-10	0.393539	0	0.690197	0	1.0338	0	0.343607	0
CL16539.Contig2_All	29.87	19.54	25.15	14.22	15.6	18.34	8.35	13.28	12.4	5.76	13.69	21.38	-0.622756	3.84671e-27	-1.10322	8.09784e-69	-0.839807	7.76885e-45	-0.480462	4.66556e-12	-0.21705	0.000240886	0.263411	0.000108942
CL1655.Contig4_All	16.2	17.71	13.09	19.4	27.2	20.68	7.36	11.48	22.82	6.99	12.37	12.39	0.521077	7.72066e-41	-0.162592	9.47478e-05	-0.555784	1.16317e-32	-0.68367	6.04997e-65	-1.07686	2.23561e-140	-0.393192	2.24929e-16
CL16571.Contig4_All	4.13	6.42	5.03	20.55	13	6.87	26.79	16.61	20.19	4.57	7.15	9.84	1.38017	1.19684e-153	2.03637	0	0.478349	2.41423e-15	0.656192	6.33493e-71	-0.901826	4.24201e-79	-1.55802	3.75644e-289
CL16571.Contig44_All	7.34	11.51	7.81	26.93	17.12	13.77	26.39	18.56	23.5	5.54	8.1	10.52	1.12224	2.8097e-120	1.37119	4.61891e-194	-0.12986	0.00862323	0.248952	3.67467e-11	-1.2521	6.24975e-144	-1.50105	3.48364e-223
CL16574.Contig15_All	142.89	91.75	139.73	72.86	50.57	67.35	48.51	90.12	93.18	107.08	177.06	157.59	-0.968931	0	-0.679785	0	0.246015	3.03447e-90	0.289146	2.16745e-64	1.21495	0	0.925801	0
CL16574.Contig28_All	54.13	55.09	81.04	61.91	30.93	38.46	68.95	64.67	76.07	90.51	171.21	190.72	-0.530867	6.09551e-165	0.148451	6.34974e-18	1.25767	0	0.679318	8.51077e-282	1.78853	0	1.10921	0
CL16576.Contig3_All	19.42	20.84	18.39	45.1	31.72	24.94	48.67	37.64	29.79	8.39	19.6	28.29	0.800822	1.0283e-102	0.999871	7.29972e-170	-0.0440094	0.0772975	0.199049	1.33045e-10	-0.844831	2.18615e-113	-1.04388	3.96048e-183
CL16580.Contig27_All	45.93	26.22	50.54	41.98	15.93	23.19	56	51.45	55.12	31.22	49.36	54.7	-0.591428	8.06174e-97	0.417432	9.7623e-69	0.151506	5.04342e-10	1.00886	0	0.742934	4.54829e-161	-0.265926	1.2093e-30
CL16596.Contig7_All	30.73	50.28	39.72	68.43	43.83	43.55	115.42	74.82	91.36	56.44	87.24	112.2	0.371073	4.6406e-100	1.22551	0	1.08958	0	0.854432	0	0.718502	0	-0.13593	8.64413e-28
CL16605.Contig17_All	101.42	126.87	112.54	142.01	116.29	124.92	55.49	183.21	154.62	41.58	52.37	60.99	0.172746	7.10816e-35	0.222046	3.57397e-57	-1.1284	0	0.0492996	0.000114472	-1.30115	0	-1.35045	0
CL16608.Contig5_All	29.86	14.65	38.5	9.42	7.12	9.82	4.04	9.13	6.38	19.59	41.02	24.53	-1.65197	0	-2.07267	0	0.0417949	0.0274438	-0.420703	8.5251e-18	1.69376	0	2.11446	0
CL16612.Contig10_All	1.59	2.09	1.52	21.4	24.27	22.58	9.9	20.4	18.15	0.5	0.46	0.36	3.72091	0	3.23908	0	-1.96324	2.68328e-25	-0.481833	1.69235e-32	-5.68415	0	-5.20232	0
CL16612.Contig11_All	22.34	29.43	10.23	193.18	237.22	246.22	130.37	158.52	157.13	1.23	2.95	1.43	3.45174	0	2.86131	0	-3.45466	0	-0.590428	0	-6.90639	0	-6.31597	0
CL16612.Contig5_All	2.26	1.44	1.28	19.68	25.56	25.61	9.12	18.89	17.09	0.28	0.75	0.29	3.8331	0	3.19216	0	-1.90971	4.1536e-31	-0.640943	1.0131e-73	-5.74281	0	-5.10187	0
CL1663.Contig7_All	12.57	10.49	11.88	25.02	12.16	9.93	19.37	22.95	15.08	2.98	4.53	8.24	0.435727	5.09801e-35	0.725698	2.75345e-103	-1.14152	1.58044e-134	0.289971	1.21894e-20	-1.57725	1.08298e-296	-1.86722	0
CL16638.Contig17_All	28.79	17.77	28.03	49.24	49.28	36.09	43.94	52.28	41.15	9.9	17.72	15.49	0.856405	3.47506e-182	0.895529	4.11545e-201	-0.780374	2.84789e-87	0.0391242	0.0381833	-1.63678	0	-1.6759	0
CL16638.Contig31_All	18.31	14.65	20.89	42.4	31.94	22.7	38.45	43.01	39.94	6.54	9.74	9.55	0.854118	3.89837e-161	1.18421	0	-1.05054	3.90307e-127	0.330091	1.72811e-37	-1.90466	0	-2.23475	0
CL16644.Contig1_All	7.19	6.36	14.78	7.43	3.68	4.21	9.21	6.98	6.89	13.32	21.46	21.18	-0.880411	1.30313e-38	-0.282591	1.92987e-06	0.994142	3.17568e-92	0.59782	3.88248e-17	1.87455	6.67331e-239	1.27673	2.0694e-136
CL16645.Contig30_All	3.59	6.69	3.88	13.74	6.86	4.05	24.5	17.62	17.38	12.25	23.37	30.15	0.803127	1.8408e-142	2.07199	0	2.21835	0	1.26887	0	1.41522	0	0.146359	1.47322e-17
CL16659.Contig10_All	10.06	23.7	11.85	30.85	20.4	15.81	37.5	28.79	37.4	16.8	32.93	32.53	0.561609	1.92519e-39	1.19724	2.46446e-214	0.863015	4.55727e-101	0.635629	2.22156e-74	0.301406	7.06621e-17	-0.334223	2.55215e-24
CL16668.Contig63_All	6.1	7.66	10.72	13.52	13.34	11.38	27.07	17.8	27.71	13.5	18.62	24.85	0.647492	5.02508e-44	1.57521	0	1.22814	1.06669e-188	0.927718	1.20908e-150	0.580645	1.98706e-54	-0.347073	1.58722e-27
CL16676.Contig2_All	162.48	74.09	225.55	19.72	20.51	26.86	6	23.45	16.88	76.54	66.09	60.82	-2.78107	0	-3.30169	0	-1.17634	0	-0.520623	5.01753e-50	1.60473	0	2.12535	0
CL16676.Contig3_All	69.72	40.15	72.76	13	30.95	25.51	8.81	22.3	18.4	21.57	36.84	23.87	-1.39339	0	-1.86946	0	-1.14445	0	-0.476068	1.92917e-50	0.248938	1.79042e-19	0.725006	1.10314e-125
CL16678.Contig4_All	4.14	3.28	3.61	27.04	15.59	10.24	24.04	19	19.33	0.39	1.12	1.12	2.26407	0	2.50187	0	-2.07056	3.27486e-198	0.237795	3.36898e-29	-4.33463	0	-4.57243	0
CL16698.Contig7_All	7.96	8.14	8.38	14.89	12.49	24.2	9.41	12.65	10.52	6.7	10.34	8.76	1.07828	1.5361e-105	0.426816	9.22855e-15	0.0852537	0.0388646	-0.651462	1.78259e-45	-0.993024	2.7318e-93	-0.341562	1.88597e-10
CL1670.Contig3_All	11.71	19.5	16.19	7.77	14.59	5.4	0.92	2.94	1.36	8.97	21.65	18.38	-0.770712	1.20092e-118	-3.16862	0	0.0526462	0.018806	-2.39791	0	0.823358	1.01652e-138	3.22126	0
CL1670.Contig5_All	111.2	137.44	119.02	82.81	117.68	90.1	48.54	38.37	68	66.96	91.54	106.14	-0.338098	2.33458e-198	-1.24267	0	-0.468784	0	-0.90457	0	-0.130687	2.75549e-27	0.773884	0
CL16706.Contig3_All	11.96	7.32	6.86	13.1	13.09	27.28	6.89	12.77	8.24	6.66	11.18	5.49	1.03379	1.04099e-195	0.105407	0.00368518	-0.160322	5.99299e-05	-0.92838	3.81336e-163	-1.19411	3.4784e-248	-0.265729	1.11641e-10
CL16719.Contig6_All	33.21	31.39	37.01	45.64	39.33	38.43	51.47	67.14	47.71	19.54	30.84	28.32	0.284392	2.21712e-26	0.724824	5.38046e-187	-0.359328	1.90489e-33	0.440432	4.59193e-77	-0.64372	8.46081e-114	-1.08415	0
CL1672.Contig9_All	123.2	116.88	143.76	159.57	94.11	101.42	295.55	187.58	244.74	190.66	267.12	349.95	-0.108245	3.32957e-18	0.929161	0	1.08142	0	1.03741	0	1.18967	0	0.152261	2.04052e-69
CL16740.Contig46_All	10.13	12.32	7.88	20.11	24.18	16.8	11.43	15.74	18.07	3.87	7.06	4.06	1.01384	9.1476e-116	0.589525	5.59202e-35	-1.00896	3.33445e-58	-0.424315	3.47484e-26	-2.0228	0	-1.59848	1.47845e-174
CL16741.Contig13_All	25.29	26.15	18.11	42.04	50.12	61.54	27.99	54.45	52.49	5.28	6.26	8.58	1.14704	0	0.970483	5.70371e-252	-1.77832	0	-0.176552	3.98933e-14	-2.92536	0	-2.7488	0
CL16798.Contig12_All	65.05	29	62.32	22	41.24	46.1	8.7	37.72	27.4	13.44	35.34	17.65	-0.51396	7.47817e-104	-1.06534	0	-1.22812	0	-0.551384	1.49507e-82	-0.714162	1.29688e-131	-0.162777	2.13524e-07
CL16798.Contig14_All	6.78	7.8	4.9	8.5	6.25	5.05	19.16	9.8	8.24	9.78	20.53	23.92	0.028681	0.176366	0.945513	5.14496e-53	1.49067	4.99753e-157	0.916832	2.51168e-50	1.46199	7.5888e-153	0.54516	1.49333e-30
CL16802.Contig3_All	53.25	28.61	52.05	51.09	46.48	49.28	41.67	61.83	64.61	10.43	19.41	14.6	0.136035	3.09514e-12	0.338255	1.74581e-70	-1.58536	0	0.20222	1.66359e-27	-1.7214	0	-1.92362	0
CL16824.Contig5_All	14.56	9.89	15.81	4.63	2.81	6.28	12.7	10.07	9.41	10.86	23.11	22.43	-1.55073	1.56372e-255	-0.316861	5.08833e-18	0.492478	4.07736e-54	1.23386	6.38323e-145	2.0432	0	0.809339	1.06793e-127
CL16847.Contig14_All	29.94	64	23.67	15.52	23.49	8.89	20.48	15.07	24.02	3.4	9.17	10.72	-1.29242	0	-0.972891	5.52047e-226	-2.32589	0	0.319526	3.00588e-17	-1.03347	3.95214e-104	-1.353	2.21274e-196
CL16863.Contig2_All	7.04	12.43	5.45	14.06	22.55	15.72	6.17	10.78	11.45	6.92	10.38	12.79	1.07496	5.11951e-85	0.205183	0.000564398	0.285931	2.21327e-06	-0.86978	5.55792e-60	-0.789032	5.71904e-52	0.080748	0.0506625
CL16886.Contig2_All	38.88	46.73	27.39	25.11	63.36	50.7	8.55	26.76	28.08	10.01	14.67	10.94	0.303476	2.9364e-27	-0.816926	2.38365e-126	-1.65524	0	-1.1204	9.33417e-262	-1.95872	0	-0.838317	4.30311e-76
CL16901.Contig1_All	39.68	24.29	27.93	31.53	15	23.7	12.11	17.01	12.96	12.07	11.16	15.26	-0.384155	2.48811e-76	-1.11831	0	-1.24997	0	-0.73415	1.09204e-185	-0.865816	4.55997e-249	-0.131666	2.93171e-06
CL16901.Contig17_All	23.25	24.56	7.38	23.44	11.93	17.68	4.77	13.76	9.2	9.24	7.95	2.56	-0.0532779	0.00342066	-0.981415	0	-1.48133	0	-0.928137	0	-1.42805	0	-0.49991	7.66088e-58
CL16901.Contig23_All	63.37	40.8	83.67	22.13	7.52	19.7	13.5	14.98	15.44	38.45	36.1	62.03	-1.92532	0	-2.09232	0	-0.455503	0	-0.167	1.2121e-14	1.46981	0	1.63681	0
CL16901.Contig27_All	34.58	47.16	48.29	28.74	6.71	23.66	4.72	20.27	13.45	25.36	26.35	20.14	-1.13282	0	-1.74184	0	-0.849771	1.7561e-253	-0.609013	4.04023e-65	0.283054	4.97303e-21	0.892067	8.4825e-153
CL16936.Contig16_All	18.29	19.78	15.77	38.9	54.05	25.62	21.74	6.73	18.44	12.56	18.6	12.39	1.14272	4.87267e-287	-0.19325	6.51061e-07	-0.298036	9.28914e-14	-1.33597	0	-1.44076	0	-0.104786	0.00403122
CL16941.Contig12_All	29.09	17.49	46.99	41.72	14.08	23.46	75.79	50.07	64.83	40.26	79.96	56.77	-0.235144	3.25529e-25	1.03126	0	0.923923	0	1.26641	0	1.15907	0	-0.10734	2.59644e-12
CL16945.Contig1_All	24.93	25.34	33.85	11.18	15.84	15.78	5.69	12.86	13	9.1	12.95	4.1	-0.971697	2.83452e-147	-1.39967	2.59125e-261	-1.67979	0	-0.427972	4.08962e-19	-0.708095	1.40265e-45	-0.280122	1.06875e-07
CL16945.Contig9_All	43.63	37.91	32.22	28.97	16.09	10.61	19.98	20.16	19.08	21.89	28.45	39.46	-1.02556	4.5603e-238	-0.930137	5.23878e-202	-0.330421	2.7455e-33	0.0954264	0.00336739	0.695142	1.90106e-99	0.599715	2.16205e-76
CL16965.Contig10_All	24.85	23.06	20.35	8.72	16.27	10.29	13.05	11.51	7.39	10.48	18.52	12.69	-0.950698	3.66841e-209	-1.08766	7.61636e-260	-0.706449	3.75779e-127	-0.136967	0.000103346	0.244249	6.2065e-13	0.381216	8.40471e-27
CL16965.Contig6_All	14.61	17.64	9.15	34.5	23.35	20.51	10.62	12.8	28.42	7.15	13.5	16.73	0.924319	4.20538e-183	0.331547	9.23062e-21	-0.139019	0.000107506	-0.592772	5.82864e-85	-1.06334	4.95425e-232	-0.470567	2.25219e-38
CL1697.Contig10_All	13.65	7.54	13.89	23.35	37	16.18	9.23	12.77	5.47	5.29	9.1	4.35	1.12852	4.11478e-212	-0.338706	3.50099e-13	-0.899689	2.03352e-68	-1.46722	0	-2.02821	0	-0.560983	8.60506e-25
CL1697.Contig4_All	48.5	63.57	34.39	92.43	95.73	41.58	30.95	50.31	54.32	15.73	31.22	27.88	0.653226	6.57208e-280	-0.100254	8.00652e-07	-0.961246	0	-0.75348	0	-1.61447	0	-0.860991	6.45176e-269
CL1697.Contig6_All	22.98	29.84	18.56	64.73	55.09	24.68	18.34	34.28	27.35	9.1	20.69	17.73	1.02047	0	0.173104	2.11769e-17	-0.583123	5.25669e-139	-0.847363	0	-1.60359	0	-0.756227	7.64152e-246
CL16998.Contig1_All	0.7	0.73	0.55	23.75	13.18	21.2	22	26.21	30.21	0.24	0.5	0.4	4.88297	0	5.31848	0	-0.789487	2.82333e-07	0.435505	6.0776e-75	-5.67246	0	-6.10796	0
CL17001.Contig3_All	62.77	69.88	72.06	100.94	105.15	108.72	19.99	94.15	77.05	13.55	18.71	22.72	0.62322	0	-0.0842415	1.06926e-07	-1.88973	0	-0.707461	0	-2.51295	0	-1.80549	0
CL17008.Contig9_All	21.23	22.49	21.43	53.46	59.04	30.37	75.51	61.64	87.99	24.15	23.05	36.8	1.13824	2.34247e-269	1.80179	0	0.380135	5.45885e-25	0.66355	1.17703e-170	-0.758108	3.19987e-138	-1.42166	0
CL17029.Contig33_All	7.87	10.56	12.3	17.93	10.9	11.11	28.2	21.68	27.45	17.99	25.84	30.5	0.383919	8.89188e-13	1.34461	2.46831e-188	1.28755	4.94422e-171	0.960694	2.60839e-110	0.903628	2.63366e-97	-0.0570655	0.0339966
CL17067.Contig83_All	23.29	14.21	17.33	9.29	5.59	9.24	5.15	12.51	10.15	18.18	26.97	26.29	-1.18206	0	-0.96886	6.46741e-256	0.386313	4.77612e-67	0.2132	5.61409e-10	1.56837	0	1.35517	0
CL17075.Contig3_All	16.45	8.85	18.88	31.03	28.22	19.43	14.39	15.79	29.48	10.14	6.16	16.3	0.836434	5.08413e-157	0.441417	2.17919e-39	-0.428825	2.19832e-28	-0.395017	6.3052e-42	-1.26526	0	-0.870242	2.57816e-128
CL17079.Contig11_All	124.54	79.47	164.72	32.64	19.39	23.84	10.47	25.81	16.85	125.83	215.47	202.15	-2.27726	0	-2.78177	0	0.565789	0	-0.504509	1.09696e-70	2.84305	0	3.34756	0
CL17079.Contig13_All	27.08	12.24	31.61	3.29	3.53	6.62	0.94	3.61	2.24	16.73	22.17	17.98	-2.39883	0	-3.37067	0	-0.314342	3.73059e-37	-0.971839	4.33516e-52	2.08449	0	3.05632	0
CL17079.Contig24_All	150.96	89.17	191.31	66.03	47.93	57.9	38.98	79.81	61.75	125.81	206.92	162.53	-1.32485	0	-1.24515	0	0.204329	4.88147e-88	0.0796979	9.14658e-07	1.52918	0	1.44948	0
CL17089.Contig1_All	15.82	10.45	23.93	49.47	34.13	14.87	62.95	34.18	52.38	13.09	51.55	38.07	0.977356	1.42848e-200	1.58171	0	1.04141	6.29362e-234	0.60435	1.44099e-132	0.0640519	0.00335252	-0.540298	1.98812e-109
CL1709.Contig14_All	9.43	8.95	11.21	13.47	14.92	12.69	33.85	25.32	19.79	3.4	7.75	4.84	0.476846	2.22674e-23	1.42697	3.33335e-269	-0.878801	6.82176e-48	0.950124	2.61991e-141	-1.35565	3.06441e-131	-2.30577	0
CL17093.Contig53_All	15.18	30.27	12.98	10.04	14.11	14.83	3.99	12.96	10.17	16.37	16.88	15.97	-0.581836	1.89672e-62	-1.09331	1.18959e-180	-0.241152	1.02655e-13	-0.511478	9.81563e-34	0.340683	2.01009e-21	0.852162	3.11552e-102
CL17099.Contig2_All	62.53	61.27	84.39	47.67	33.89	38.2	23.76	39.85	34.75	59.35	84.75	78.66	-0.795319	0	-1.07327	0	0.101532	9.88299e-16	-0.277947	1.74778e-53	0.896851	0	1.1748	0
CL171.Contig10_All	61.06	67.49	59.07	10.99	27.67	21.45	5.9	9.62	11.36	10.03	18.1	30.76	-1.64303	0	-2.7969	0	-1.66707	0	-1.15386	0	-0.0240386	0.0328448	1.12982	0
CL171.Contig16_All	45.19	61.39	18.86	21.08	41.89	45.3	4.9	16.42	21.92	18.87	32.13	22.82	-0.211697	3.06625e-31	-1.52663	0	-0.760924	0	-1.31493	0	-0.549227	4.50328e-155	0.765706	1.37725e-189
CL17117.Contig14_All	41.58	70.82	58.48	47.07	38.85	34.08	14.7	34.63	33.45	21.12	39.64	31.49	-0.506464	4.10936e-127	-1.03276	0	-0.882343	0	-0.526297	6.88984e-96	-0.375879	2.67135e-53	0.150418	1.14497e-08
CL17117.Contig2_All	64.95	56.39	49.51	85.2	60.22	51.38	15.2	44.45	31.59	23.42	18.34	36.39	0.208954	2.70017e-22	-0.887394	2.07845e-253	-1.11663	0	-1.09635	0	-1.32558	0	-0.229235	2.43335e-13
CL17121.Contig3_All	5.75	9.71	5.54	11.9	21.56	9.43	25.43	16.61	23.34	9.23	9.19	7.12	1.03277	1.58537e-93	1.64658	1.58661e-289	0.289337	1.73702e-07	0.613813	8.03269e-59	-0.743432	5.07651e-55	-1.35724	6.128e-219
CL17129.Contig13_All	5.28	12.85	9.94	15.54	12.14	7.09	24.07	10.92	19.54	8.95	4.46	6.32	0.310506	7.00937e-28	0.956782	0	-0.505023	3.93858e-54	0.646277	3.13049e-158	-0.815529	8.04034e-154	-1.46181	0
CL17129.Contig6_All	18.44	26.8	25.57	20.42	27.97	24.06	10.13	13.49	21.67	7.15	3.28	3.76	0.0343677	0.055281	-0.637774	3.1112e-104	-2.31406	0	-0.672142	1.06697e-116	-2.34843	0	-1.67628	0
CL17133.Contig8_All	20.22	9.5	17.2	35.97	26.13	23.63	28.02	33.19	39.78	11.77	13.82	16.16	0.874545	3.38954e-137	1.11793	7.56552e-242	-0.158678	5.53551e-05	0.243384	3.33974e-17	-1.03322	5.19933e-182	-1.27661	1.3742e-299
CL17135.Contig11_All	108.46	81.34	113.29	30.68	19.59	22.67	30.89	31.02	40.49	130.2	224.98	256.93	-2.05212	0	-1.56066	0	1.01877	0	0.491459	6.29891e-141	3.07089	0	2.57943	0
CL17135.Contig12_All	702.51	659.8	754.5	336.51	244.76	307.07	222.01	288.01	328.91	464.5	774.64	856.99	-1.24989	0	-1.3274	0	-0.00816821	0.0205707	-0.0775062	3.06061e-27	1.24173	0	1.31923	0
CL17140.Contig8_All	6.88	6.41	5.9	24.69	41.13	44.77	11.73	29.78	24.39	0.68	1.74	2.42	2.52883	0	1.79412	0	-1.97877	1.98559e-130	-0.734703	1.54438e-157	-4.5076	0	-3.7729	0
CL1715.Contig1_All	12.2	7.06	14.29	6.52	4.58	4.98	9.54	10.02	8.21	9.22	13.16	24.55	-1.05605	3.67134e-71	-0.259505	2.63466e-07	0.497721	1.77216e-28	0.796541	1.08262e-37	1.55377	1.35252e-181	0.757226	8.60495e-58
CL1715.Contig5_All	10.1	10.07	15.55	17.54	8.28	10.61	24.2	23.44	19.67	16.14	27.92	34.29	0.0334003	0.128284	0.926094	9.92997e-116	1.1441	4.02499e-191	0.892694	1.149e-108	1.1107	1.5754e-182	0.218009	2.56999e-11
CL1717.Contig14_All	168.56	57.66	238.02	44.46	39.32	76.53	25.74	111.78	74.96	60.82	143.75	87.41	-1.5317	0	-1.11136	0	-0.663122	0	0.420341	9.27672e-121	0.86858	0	0.448239	6.03689e-186
CL1717.Contig15_All	264.64	98.92	349.88	86.95	53.31	74.19	49.75	92.89	75.78	159.71	224.19	205.26	-1.73061	0	-1.69601	0	-0.269896	6.50747e-197	0.0345992	0.00921007	1.46072	0	1.42612	0
CL1717.Contig8_All	11.61	7.45	20.45	4.1	3.04	4.68	1.66	4.5	2.04	15.39	24.79	22.09	-1.73852	1.46461e-301	-2.25236	0	0.661405	4.80348e-102	-0.513842	9.22703e-14	2.39992	0	2.91376	0
CL17171.Contig10_All	7.93	10.11	10.48	9.09	4.58	5.65	9.78	7.99	12.62	14.93	23.69	26.34	-0.558795	1.31027e-63	0.0938072	0.000649104	1.19086	0	0.652602	2.01295e-88	1.74966	0	1.09705	0
CL17183.Contig26_All	12.23	5.97	11.75	18.49	18.05	24.21	19.44	30.91	34.4	3.71	7.08	5.25	1.02229	0	1.50806	0	-0.897865	2.35617e-139	0.485777	2.07487e-132	-1.92015	0	-2.40593	0
CL17212.Contig7_All	6.52	8.62	9.37	14.32	7.18	6.14	20.98	10.07	14.37	10.91	28.96	29.48	0.181031	0.00217558	0.903105	2.23895e-54	1.51571	1.14508e-186	0.722074	1.60527e-37	1.33468	1.14932e-154	0.61261	5.80992e-43
CL1722.Contig9_All	36.32	48.29	40.34	104.41	44.09	56.62	57.76	62.49	36.38	12.5	26.74	44.08	0.720893	1.47134e-195	0.341139	1.01659e-39	-0.570322	8.20873e-80	-0.379754	5.8217e-62	-1.29122	0	-0.911461	4.74043e-225
CL17229.Contig11_All	14.92	12.57	16.23	37.68	18.26	22	40.03	41.85	26.42	7.94	21.72	13.55	0.838311	4.96183e-208	1.31672	0	-0.0124852	0.161516	0.478413	3.3325e-107	-0.850796	9.227e-215	-1.32921	0
CL17229.Contig33_All	33.12	29.9	58.53	49.4	23.19	34.38	81.42	53.19	59.26	47.65	127.36	62.48	-0.179649	8.05298e-13	0.682046	1.85406e-214	0.972913	0	0.861696	0	1.15256	0	0.290867	2.85222e-56
CL1725.Contig7_All	12.12	21.08	5.85	18.58	25.94	19.58	11.46	16.31	21.84	3.36	5.1	7.22	0.718963	9.78486e-57	0.359757	6.14605e-14	-1.30306	6.25273e-92	-0.359207	2.7373e-17	-2.02202	2.29114e-280	-1.66281	2.56952e-167
CL1736.Contig82_All	82.91	48.15	105.01	22.17	9.17	10.37	8.16	12.76	12.8	84.21	144.59	127.27	-2.49622	0	-2.79857	0	0.597774	0	-0.30235	5.88507e-20	3.09399	0	3.39634	0
CL1751.Contig6_All	11.62	12.58	11.43	14.19	22.44	14.96	12.84	14.33	13.39	5.23	7.64	6.02	0.537074	4.64733e-40	0.198782	1.94867e-06	-0.907578	1.87476e-68	-0.338292	5.25928e-18	-1.44465	2.6146e-205	-1.10636	2.19698e-107
CL1781.Contig40_All	13.63	11.33	19.98	15.28	8.88	11.1	30.89	29.07	23.03	14.09	20.88	26.43	-0.346542	3.90051e-26	0.891737	2.78962e-248	0.456631	6.07375e-58	1.23828	0	0.803173	6.51469e-156	-0.435106	7.06188e-71
CL1783.Contig19_All	3	11.58	7.34	18.73	18.78	15.83	38.84	33.52	22.41	19.03	10.53	14.49	1.28466	2.27257e-284	2.11824	0	1.01142	5.08504e-162	0.833585	1.87209e-248	-0.273241	1.99484e-20	-1.10683	0
CL1789.Contig3_All	26.2	8.57	17.26	5.22	7.1	4.95	2.93	10.13	10.98	22.34	40.82	19.25	-1.58849	1.10405e-300	-1.10094	3.58617e-171	0.668316	4.12042e-118	0.487551	6.07205e-21	2.25681	0	1.76926	0
CL1816.Contig9_All	9.7	10.27	10.62	17.93	14.32	10.83	18.06	14.88	17.22	4.02	9.45	9.46	0.499618	3.07837e-19	0.728356	1.06081e-41	-0.401471	3.55262e-10	0.228738	1.78902e-06	-0.901089	1.10371e-51	-1.12983	9.52435e-86
CL1821.Contig15_All	11.68	9.67	8.06	42.58	18.48	21.39	53.21	43.37	39.76	3.75	4.87	3.64	1.49145	0	2.21732	0	-1.25878	4.81632e-216	0.72587	0	-2.75023	0	-3.4761	0
CL1830.Contig16_All	14.84	15.64	16.53	10.49	7.25	8.42	7.05	8.75	7.53	11.75	18.28	17.3	-0.842882	8.61931e-134	-1.00307	4.21956e-178	0.0147074	0.146068	-0.160184	3.90497e-05	0.857589	3.06218e-140	1.01777	3.69619e-185
CL1833.Contig4_All	4.1	7.03	4.95	12.87	10.73	11.29	26.29	16.86	14.13	3.62	6.36	9.84	1.12108	9.39156e-103	1.84045	0	0.311531	8.13906e-08	0.719371	4.90027e-80	-0.80955	3.77157e-61	-1.52892	7.5148e-271
CL1834.Contig22_All	93.95	45.41	148.91	52.97	21.21	34.02	24.01	57.4	35.92	58.16	103.72	90.42	-1.41081	0	-1.28789	0	-0.190543	4.70736e-115	0.122917	2.32907e-21	1.22027	0	1.09735	0
CL1834.Contig3_All	115.72	40.7	123	61.54	40.43	31.43	22.18	56.2	57.18	48.25	177.31	146.31	-1.06395	0	-1.03541	0	0.414576	0	0.0285452	0.00614031	1.47853	0	1.44998	0
CL1846.Contig1_All	14.51	17.53	16.63	3.7	2.89	2.66	4.58	5.35	5.52	18.55	40.06	46.86	-2.39329	0	-1.6491	0	1.12079	0	0.744188	1.76986e-44	3.51408	0	2.76989	0
CL1847.Contig3_All	8.78	11.28	11.95	18.59	13.77	7.9	9.27	16.8	15.26	14.18	24.37	29.89	0.335804	1.16211e-13	0.382191	2.44703e-17	1.10655	1.94788e-170	0.0463869	0.0789354	0.77075	5.28666e-94	0.724363	5.97048e-84
CL1853.Contig5_All	193.25	413.55	241.28	381.52	200.78	144.67	571.7	334.08	279.47	398.27	627.19	670.59	-0.214083	8.41188e-53	0.503262	0	1.01847	0	0.717345	0	1.23255	0	0.515205	0
CL1857.Contig1_All	27.96	42.71	37.48	21.98	13.27	14.18	11.71	10.71	9.02	28.99	58.04	74.3	-1.12393	3.18444e-199	-1.76713	0	0.591179	2.24989e-101	-0.643194	1.17162e-36	1.71511	0	2.35831	0
CL1859.Contig25_All	6.72	9.8	7.81	12.56	10.03	11.16	16.24	17.83	22.85	8.08	21.88	12.59	0.475008	1.44145e-41	1.23233	0	0.809557	2.77918e-132	0.757326	6.40357e-156	0.334549	1.91293e-28	-0.422777	3.87761e-56
CL1862.Contig3_All	51.96	45.59	39.18	11.52	11.84	14.56	10.87	15.59	11.12	20.48	34.24	41.8	-1.84841	0	-1.85368	0	-0.496349	2.79807e-159	-0.00527045	0.215113	1.35206	0	1.35733	0
CL1862.Contig4_All	98.76	81.41	74.08	17.15	8.18	8.92	7.73	6.99	8.85	14.55	38.17	39.58	-2.88756	0	-3.42605	0	-1.45626	0	-0.538482	1.1377e-47	1.4313	0	1.96978	0
CL1872.Contig9_All	2.05	1.41	1.79	10.79	19.8	17.45	17	29.31	22.47	0.29	0.69	0.27	3.19386	0	3.71861	0	-2.06066	3.93912e-170	0.524755	6.1481e-244	-5.25452	0	-5.77928	0
CL1878.Contig11_All	17.32	19.76	17.23	23.59	13.08	12.25	30.88	28.87	13.54	31.88	49.29	43.14	-0.146631	2.70319e-06	0.441337	1.92511e-51	1.2007	0	0.587968	2.42273e-85	1.34733	0	0.759361	8.43197e-226
CL1898.Contig2_All	24.77	11.57	27.59	5.99	8.76	10.34	2.91	4.09	3.94	5.97	6.24	8.68	-1.34967	0	-2.5421	0	-1.6109	0	-1.19243	0	-0.261234	8.35701e-29	0.931201	1.0134e-224
CL1898.Contig4_All	75.85	97.94	99.84	19.92	40.48	54.56	43.16	26.35	22.53	31.44	57.62	51.18	-1.25091	0	-1.56796	0	-0.959384	0	-0.317049	4.86292e-54	0.291526	2.53879e-57	0.608576	2.22803e-216
CL1920.Contig2_All	7.83	8.13	7.89	14.16	14.02	11.76	16.18	12.92	19.23	11.52	23.44	26.35	0.748965	8.54414e-38	1.03177	7.40615e-77	1.37592	1.23626e-153	0.282801	4.02547e-09	0.626956	5.01446e-43	0.344155	2.06961e-15
CL1921.Contig5_All	12.09	14.12	18.98	29.92	9.12	16.27	18.11	32.01	29.33	7.39	12.37	13.13	0.296329	1.0997e-19	0.824791	2.6886e-167	-0.451652	4.42341e-34	0.528462	6.73324e-77	-0.747981	6.80414e-100	-1.27644	0
CL1935.Contig10_All	11.39	4.18	13.57	9.39	5.06	5.97	11.12	17.44	10.91	7.91	19.86	18.54	-0.509239	7.93751e-34	0.448084	3.0853e-36	0.673904	8.14439e-87	0.957322	3.18536e-133	1.18314	1.38388e-221	0.225821	5.53288e-13
CL1935.Contig34_All	20.1	9.06	21.81	8.51	5.37	11.19	3.87	8.45	10.29	11.34	15.99	8.59	-1.02167	1.34139e-206	-1.16421	3.84509e-254	-0.501924	2.17164e-61	-0.142543	0.000203542	0.519744	5.9269e-47	0.662287	9.35824e-71
CL1935.Contig5_All	8.47	11.45	14.33	10.32	6.31	6.84	14.88	8.72	9.91	10.07	20.12	17.65	-0.54216	1.17299e-48	-0.0284849	0.11713	0.486327	4.80703e-56	0.513675	3.15454e-43	1.02849	7.88692e-203	0.514812	1.11214e-61
CL1940.Contig6_All	28.39	23.5	41.71	32.11	15.32	18	47.07	20.57	41.61	30.21	68.47	40.51	-0.512154	3.09507e-84	0.226247	1.51022e-22	0.577525	1.04701e-155	0.738401	2.82748e-186	1.08968	0	0.351278	3.86238e-63
CL1946.Contig52_All	543.58	524.12	474.78	298.39	340.86	369	214.78	251.34	272.5	350.62	443.69	541.62	-0.609874	0	-1.04937	0	-0.196384	6.87672e-142	-0.439501	0	0.41349	0	0.852991	0
CL1948.Contig4_All	10.5	12.05	12.13	14.83	19.34	19.16	10.01	17.7	15.44	5.65	10.64	9.01	0.622266	2.30852e-97	0.32409	3.90842e-25	-0.451073	9.85887e-37	-0.298176	2.99522e-26	-1.07334	9.93237e-247	-0.775163	2.04809e-116
CL1968.Contig9_All	18.8	11.32	15.15	32.32	18.48	21.43	18.08	25.13	29.59	6	12.97	5.89	0.677778	2.78772e-171	0.692692	3.54506e-179	-0.862043	1.49263e-163	0.0149141	0.131025	-1.53982	0	-1.55473	0
CL1974.Contig2_All	11.67	14.37	10.53	15.77	18.83	26.87	18.51	33.31	19.81	4.02	3.33	8.59	0.750969	1.25962e-108	0.982358	2.61159e-199	-1.18805	3.3259e-139	0.231389	5.10882e-16	-1.93902	0	-2.17041	0
CL1975.Contig3_All	26.38	17.96	31.78	9.78	8.57	14.67	3.67	13.49	11.34	11.17	19.55	21.21	-1.20189	9.86429e-190	-1.40003	3.69376e-239	-0.540607	5.66047e-50	-0.198145	6.59044e-05	0.66128	1.33479e-49	0.859425	2.55505e-76
CL1978.Contig6_All	42.24	19.79	53.47	10.88	6.81	8.66	3.82	7.42	6.56	25.19	38.63	29.04	-2.12884	0	-2.6871	0	-0.30971	5.37823e-48	-0.558265	6.88359e-33	1.81913	0	2.37739	0
CL1987.Contig16_All	17.29	23.47	16.95	29.24	28	24.69	30.35	29.38	24.7	7.85	13.51	14.63	0.510097	4.69792e-43	0.562665	9.62234e-53	-0.669387	2.3207e-49	0.0525687	0.0362487	-1.17948	5.61445e-178	-1.23205	1.66785e-196
CL1988.Contig20_All	3.2	5.55	5.03	10.17	17.36	13.85	12.24	21.12	24.57	2.21	6.39	4.32	1.58817	2.54065e-189	2.08323	0	-0.0856851	0.0607614	0.495065	4.15639e-39	-1.67385	1.98982e-205	-2.16892	0
CL1988.Contig85_All	24.37	10.78	26.2	8.88	5.49	11.13	12.65	17.07	19.02	29.02	49.61	29.32	-1.26359	5.49457e-231	-0.321758	2.36207e-22	0.820871	3.70641e-202	0.941829	4.9392e-115	2.08446	0	1.14263	0
CL1990.Contig2_All	24.38	22.14	14.92	11.98	19.76	17.77	6.52	15.67	14.65	5.92	14.22	9.23	-0.310502	5.18285e-35	-0.727392	5.82774e-159	-1.06089	1.85801e-302	-0.41689	4.75583e-48	-0.750389	4.23973e-137	-0.333499	7.32685e-25
CL1992.Contig1_All	90.28	41.34	119.79	43.35	24.44	33.62	13.63	25.61	31.8	33.49	74.72	27.12	-1.30603	0	-1.81327	0	-0.890091	0	-0.507243	3.03113e-92	0.415938	7.82465e-87	0.923181	0
CL1994.Contig7_All	25.61	32.25	30.16	58.32	40.02	33.57	25.01	84.44	108.36	16.81	30.52	43.59	0.587907	1.08502e-120	1.32011	0	0.0566864	0.0113918	0.732202	5.37276e-292	-0.531221	1.05728e-101	-1.26342	0
CL1999.Contig9_All	14.13	18.69	14.3	27.95	20.85	17.46	36.35	31.21	29.72	12.18	18.97	23.97	0.496889	1.02692e-35	1.05798	6.70011e-188	0.238111	4.63882e-09	0.561086	8.13826e-64	-0.258778	3.36902e-12	-0.819864	9.18228e-124
CL2013.Contig15_All	9.96	15.88	11.67	8.84	14.85	9.49	5.49	4.59	8.58	8.99	19.39	19.9	-0.175323	5.95659e-07	-1.0024	2.298e-127	0.370296	9.64411e-30	-0.827079	4.70922e-82	0.545619	5.25022e-59	1.3727	5.43774e-271
CL2013.Contig18_All	22.95	22.3	26.36	5.9	24.44	22.25	2.01	3.81	5.19	7.47	13.84	11.61	-0.445562	4.52738e-54	-2.69132	0	-1.11552	3.26382e-263	-2.24576	0	-0.669954	6.85503e-83	1.5758	3.48734e-206
CL2024.Contig11_All	53.29	83.86	53.41	129.77	75.19	83.48	30.79	59.79	87.69	25.75	48.21	58.92	0.603313	5.38901e-193	-0.0818846	0.000159604	-0.507144	2.6263e-94	-0.685198	2.26185e-240	-1.11046	0	-0.425259	9.29818e-65
CL2041.Contig1_All	8.04	9.54	8.18	10.05	19.7	12.59	11.75	16.94	16.65	3.53	5.87	7.8	0.718819	4.48928e-71	0.825976	1.96948e-96	-0.574995	2.13565e-30	0.107156	0.000862693	-1.29381	4.35446e-187	-1.40097	4.38342e-226
CL2051.Contig1_All	253.98	378.68	415.23	470.44	319.59	310.94	957.02	681.78	510.91	631.85	662.38	874.63	0.0764585	1.4773e-16	1.04925	0	1.06115	0	0.972791	0	0.984694	0	0.0119037	0.0201276
CL2051.Contig16_All	68.64	146.84	117.87	206.17	126.25	105.29	596.19	291.23	256.48	300.75	401.21	484.42	0.397639	2.31834e-179	1.78617	0	1.84083	0	1.38853	0	1.44319	0	0.054656	3.53719e-12
CL2051.Contig18_All	13.3	13.79	11.92	14.08	12.35	10.31	27.5	23.2	16.93	14.52	32.9	28.7	-0.0831034	0.00999309	0.802282	2.08438e-131	0.971341	3.6372e-205	0.885385	6.92373e-155	1.05444	7.60139e-235	0.16906	5.61511e-10
CL2055.Contig1_All	11.6	10.83	17.99	8.96	5.94	5.94	13.95	10.96	15.5	14.99	16.38	20.93	-0.952716	3.63116e-158	0.00348817	0.239302	0.376425	8.10328e-41	0.956204	1.07354e-158	1.32914	0	0.372936	6.10473e-40
CL206.Contig8_All	14.3	19.21	24.45	12.24	8.67	11.66	17.92	11.27	15.25	23.63	18.26	31.26	-0.828862	1.82159e-143	-0.379092	2.44176e-36	0.342478	2.05173e-38	0.449771	3.4363e-38	1.17134	0	0.72157	2.35289e-143
CL206.Contig9_All	17.59	22.66	23.41	14.82	8.71	12.57	27.26	24.16	20.8	29.28	32.16	42.87	-0.815681	6.39157e-164	0.188104	5.33448e-14	0.718615	2.84719e-217	1.00379	1.1355e-262	1.5343	0	0.530511	1.34272e-126
CL2089.Contig3_All	8.82	7.47	7.83	21.55	17.99	13.88	10.46	17.34	18.67	2.99	5.75	4.59	1.15044	9.33043e-235	0.955438	1.92968e-151	-0.850692	7.03344e-66	-0.195003	4.23494e-11	-2.00113	0	-1.80613	0
CL2097.Contig1_All	24.92	8.94	26.35	6.31	7.92	6.22	7.14	6.75	7.33	22.33	20.84	22.91	-1.55404	7.76088e-212	-1.49229	5.09281e-199	0.144486	3.83941e-05	0.0617536	0.0948867	1.69853	2.44259e-267	1.63677	1.59079e-252
CL210.Contig30_All	16.31	26.63	30.18	14.56	8.45	8.89	7.44	15.64	16.65	23.23	60.32	47.6	-1.19282	8.94248e-275	-0.869181	2.34526e-163	0.848919	5.42536e-284	0.323644	1.2842e-16	2.04174	0	1.7181	0
CL210.Contig36_All	5.19	8.17	10.68	12.31	8.58	9.08	20.02	33.9	17.67	10.38	7.23	20.52	0.319752	2.55545e-18	1.58357	0	0.672009	1.47637e-84	1.26382	0	0.352256	1.43428e-27	-0.911564	2.73604e-264
CL2103.Contig2_All	21.17	23.11	20.32	42.58	25.77	30.36	9.7	24.22	12.68	6.73	14.66	17.18	0.616389	2.11288e-80	-0.45297	4.87976e-31	-0.732888	6.62814e-72	-1.06936	4.30509e-203	-1.34928	4.93306e-296	-0.279918	1.40948e-10
CL2103.Contig3_All	18.47	20.24	15.61	30.67	24.27	25.86	11.4	20.79	21.72	4.95	10	13.02	0.576948	1.68869e-58	0.00328897	0.245338	-0.945595	3.00319e-92	-0.573659	1.29896e-57	-1.52254	2.51853e-288	-0.948884	1.42747e-92
CL2113.Contig5_All	47.82	50.87	33.16	19.28	17.82	30.92	9.66	12.98	15.69	14.67	34.23	22.54	-0.952331	1.25438e-268	-1.77148	0	-0.876903	2.31179e-235	-0.819152	5.22724e-108	0.0754284	0.00326817	0.894581	8.90388e-133
CL2119.Contig70_All	9.13	12.94	13.14	21.44	9.08	8.04	16.46	15.5	18.2	22.39	24.45	24.01	0.137436	0.00140815	0.522163	6.22351e-32	1.01831	4.2984e-139	0.384727	6.07891e-19	0.880879	8.05281e-110	0.496152	9.79689e-41
CL2125.Contig5_All	26.07	13.17	24.89	10.55	12.34	17.05	3.4	11.7	11.26	8.88	16.43	10.71	-0.681333	3.7157e-115	-1.26968	0	-0.827185	1.18993e-161	-0.588348	6.13462e-56	-0.145852	5.24197e-06	0.442496	3.39619e-31
CL2146.Contig6_All	16.92	11.95	24.8	10.77	9.65	8.24	15.71	14.35	12.75	15.42	18.27	24.2	-0.901894	5.26853e-106	-0.316675	1.60361e-17	0.117984	0.000217973	0.585219	6.47459e-41	1.01988	9.55424e-142	0.434659	8.3318e-33
CL2153.Contig1_All	1583.26	2937.02	2408.3	2539.84	1239.22	1408.45	8360.37	3270.27	3104.37	5641.49	6859.91	7606.1	-0.413334	0	1.09165	0	1.54377	0	1.50498	0	1.95711	0	0.452125	0
CL2153.Contig7_All	3239.67	4866.91	4841.86	4367.38	2374.78	3186.83	8625.72	5643.46	4390.57	8872.28	9303.44	8909.96	-0.378868	0	0.535467	0	1.07223	0	0.914335	0	1.45109	0	0.536759	0
CL2163.Contig6_All	8.56	13.54	7.47	19.66	19.17	21.23	10.13	12.91	10.58	5.49	11.98	10.93	1.02586	4.4671e-118	0.198778	4.90654e-05	-0.0481026	0.0914264	-0.827081	2.51015e-82	-1.07396	3.52238e-128	-0.24688	7.73949e-07
CL2168.Contig24_All	26.69	59.15	31.52	23.86	25.56	23.35	22.74	23.06	18.65	10	21.8	11.13	-0.687706	3.34488e-224	-0.857819	0	-1.44778	0	-0.170113	6.94121e-12	-0.760077	1.78051e-167	-0.589964	2.29072e-95
CL218.Contig23_All	5.71	8.78	5.25	15.13	9.02	7.05	17.81	14.19	20.5	11.68	20.88	29.36	0.670998	1.60603e-12	1.44043	7.99993e-66	1.67953	2.74976e-97	0.769429	7.82699e-25	1.00853	1.36619e-45	0.239104	5.32855e-05
CL2181.Contig3_All	17	16.36	7.11	18.61	29.86	25.58	16.95	17.83	18.13	5.7	11.61	11.5	0.873028	1.10777e-203	0.394302	1.40106e-36	-0.484276	6.33194e-41	-0.478726	5.56981e-71	-1.3573	0	-0.878578	1.78733e-148
CL2181.Contig4_All	7.74	14.85	17.46	29.65	16.59	21.45	19.01	19.85	19.96	4.02	8.7	14.14	0.760885	1.1603e-116	0.56332	2.10471e-60	-0.567417	1.8936e-42	-0.197565	3.38275e-11	-1.3283	2.26005e-291	-1.13074	8.27267e-197
CL2181.Contig5_All	12.93	18.16	13.43	18.48	24.98	20.24	5.88	15.57	15.83	4.07	7.87	7.4	0.518446	3.73305e-64	-0.244711	1.84856e-12	-1.19702	2.11518e-186	-0.763158	2.71953e-125	-1.71547	0	-0.952312	1.12552e-108
CL2181.Contig7_All	9.83	12.96	9.48	18.84	19.84	18.12	9.69	15.25	14.97	4.01	7.63	9.06	0.817811	3.58986e-113	0.316597	8.08469e-16	-0.633108	1.65387e-42	-0.501214	3.0889e-48	-1.45092	2.87097e-285	-0.949705	2.25293e-103
CL2188.Contig14_All	7.71	11.49	8.86	16.76	19.39	14.02	18.91	18.97	13.77	3.55	4.7	5.71	0.84217	2.70648e-69	0.893609	6.48242e-79	-0.995409	4.58607e-52	0.051439	0.061185	-1.83758	4.73342e-231	-1.88902	3.24806e-247
CL2197.Contig5_All	21.45	18.45	13.39	20.12	36.85	36.72	9.61	14.9	19.79	6.79	11.98	11.52	0.816781	1.80484e-122	-0.253685	7.92189e-10	-0.804345	5.50478e-69	-1.07047	1.00679e-190	-1.62113	0	-0.55066	1.46745e-30
CL2197.Contig7_All	37.14	40.7	26.87	41.43	62.28	53.11	18.65	25.12	37.53	11.48	19.11	17.37	0.585005	4.24766e-149	-0.355317	6.55221e-41	-1.11874	3.72133e-302	-0.940321	0	-1.70374	0	-0.76342	6.66283e-125
CL2197.Contig8_All	24.63	24.62	20.48	32.23	48.34	51.31	16.44	19.84	29.95	9.23	20.36	18.5	0.921997	7.03752e-239	-0.0639141	0.0184879	-0.526762	5.55109e-49	-0.985911	1.13411e-265	-1.44876	0	-0.462848	2.84494e-37
CL2202.Contig4_All	20.13	18.7	23.73	5.96	2.18	2.98	1.62	3.79	5.34	11.69	28.05	27.48	-2.48717	0	-2.52813	0	0.112991	0.000264313	-0.0409662	0.160238	2.60016	0	2.64112	0
CL2209.Contig8_All	5.74	7.46	6.59	15.23	18.02	12.83	18.01	11.96	13.39	4.8	9.76	8.44	1.22161	2.37525e-239	1.13584	1.75605e-200	0.221946	1.83008e-07	-0.0857651	0.00183165	-0.999661	8.17956e-175	-0.913896	2.22293e-141
CL222.Contig92_All	14.95	18.85	14.39	10.86	3.09	14.11	6.16	14.65	10.29	10.59	28.88	22.62	-0.777512	8.31277e-184	-0.621706	3.34981e-124	0.368517	4.82219e-63	0.155805	1.12123e-07	1.14603	0	0.990223	0
CL2220.Contig5_All	15.47	22.96	12.36	41.29	27.43	28.74	13.47	21.68	23.9	4.69	10.74	14.87	0.945125	1.52294e-150	0.232007	8.5992e-09	-0.732533	3.91775e-52	-0.713118	4.644e-93	-1.67766	0	-0.96454	7.69716e-96
CL2220.Contig7_All	20.72	27.56	18.45	53.52	37.92	37.47	26.32	37.6	34.41	8.11	15.61	24.57	0.955193	3.6678e-173	0.575911	3.11189e-56	-0.450972	1.62095e-25	-0.379282	1.28112e-34	-1.40617	0	-1.02688	1.36773e-150
CL2222.Contig5_All	15.43	20.67	17.21	32.85	24.1	21.76	41.86	33.71	36.32	11.74	19.48	30.35	0.566301	8.80971e-67	1.07861	1.18492e-282	0.218399	1.57291e-10	0.512308	1.13518e-78	-0.347902	8.48575e-29	-0.86021	2.18903e-195
CL2232.Contig10_All	28.05	36.21	45.93	58.82	46.42	45.52	11.14	40.91	41.1	13.32	20.36	7.77	0.455775	6.86553e-92	-0.228329	1.29075e-19	-1.4063	0	-0.684104	1.88316e-188	-1.86208	0	-1.17797	3.96034e-294
CL2233.Contig1_All	15.49	30.19	19	77.92	93.83	47.68	112.58	94.73	114.67	8.54	20.96	24.55	1.76726	0	2.32822	0	-0.245823	5.81658e-10	0.560968	1.23098e-188	-2.01308	0	-2.57405	0
CL2233.Contig5_All	23.5	14.37	15.16	27.66	21.94	35.84	6.42	29.29	24.66	3.94	6.07	2.4	0.690162	0	0.198498	7.01129e-24	-2.0936	0	-0.491664	2.36278e-173	-2.78377	0	-2.2921	0
CL2233.Contig7_All	13.1	11.8	12.78	29.55	28.54	24.68	33.32	31.86	41.65	8.25	14.32	11.58	1.137	0	1.50731	0	-0.139395	1.49861e-08	0.370306	1.24502e-123	-1.2764	0	-1.6467	0
CL2233.Contig8_All	15.26	10.96	11.46	19.96	24.9	23.69	14.73	24.12	31.95	2.02	4.73	3.88	0.864642	0	0.91633	0	-1.82173	0	0.051688	0.00184035	-2.68637	0	-2.73806	0
CL2238.Contig9_All	23.24	17.34	11.89	10.85	11.34	7.85	7.36	11.32	12.54	18.5	24.47	21.15	-0.801931	1.40601e-156	-0.740463	3.70396e-136	0.294058	1.62149e-32	0.0614687	0.0230649	1.09599	0	1.03452	8.39177e-294
CL2262.Contig46_All	17.59	19.29	7.26	15.43	24.64	31.16	8.32	21.26	14.28	3.46	4.92	7.15	0.692181	1.4368e-97	0.00575378	0.232165	-1.497	6.59235e-213	-0.686428	1.1402e-95	-2.18918	0	-1.50276	4.45924e-214
CL2266.Contig3_All	10.59	11.51	9.71	16.86	16.9	16.21	8.16	12.69	12.46	3.95	7.48	7.26	0.654808	2.19155e-57	0.0788598	0.0273464	-0.758814	6.71989e-48	-0.575949	9.17309e-46	-1.41362	1.95581e-202	-0.837674	3.24248e-59
CL2267.Contig7_All	17.01	6.68	18.58	7.42	2.75	4.96	7.34	8	9.18	9.86	22.68	14.86	-1.4786	0	-0.781528	1.81324e-180	0.167414	2.0623e-13	0.697068	1.00468e-86	1.64601	0	0.948941	1.99793e-282
CL2275.Contig1_All	4.99	12.98	9.63	7.92	17.22	15.93	27.2	22.47	17.24	8.81	7	4.38	0.576859	5.47259e-24	1.29294	5.67024e-144	-0.442123	4.16318e-11	0.716085	6.20505e-55	-1.01898	8.50513e-62	-1.73507	1.26898e-222
CL2297.Contig2_All	16.58	33.1	16.4	10.41	16	22.28	11.72	10.33	7.03	17.28	31.23	43	-0.438981	7.38511e-40	-1.17496	2.23231e-212	0.478697	2.04367e-64	-0.735976	1.44765e-72	0.917678	1.6984e-199	1.65365	0
CL2297.Contig5_All	48.63	66.86	63.79	21.48	23.91	26.04	14.83	17.35	20.92	24.96	29.88	61.62	-1.32505	0	-1.74593	0	-0.612245	1.61738e-195	-0.420877	2.12212e-40	0.712805	6.46983e-168	1.13368	0
CL2312.Contig1_All	20.7	39.08	24.21	57.47	39.78	26.91	45.38	41.21	56.26	35.22	75.94	74.21	0.571706	8.81148e-52	0.785142	5.72117e-103	1.16028	7.41983e-256	0.213436	6.27717e-11	0.588573	8.53554e-82	0.375136	1.45742e-36
CL2313.Contig13_All	54.31	103.42	57.17	105.49	114.99	83.16	117.64	129.77	168.35	41.56	35.61	99.32	0.503519	1.4895e-136	0.966287	0	-0.267838	2.86095e-31	0.462767	4.16335e-160	-0.771358	5.41552e-292	-1.23412	0
CL2318.Contig1_All	9.77	6.62	12.93	14	5.36	7.21	14.94	10.97	16.16	14.05	25.8	24.57	-0.137025	0.00112708	0.527635	1.25303e-37	1.14298	8.99571e-212	0.664661	7.28603e-56	1.28	4.13254e-253	0.615343	1.45036e-74
CL2330.Contig41_All	18.39	27.02	31.62	8.15	8.6	9.06	3.88	7.05	5.97	7.61	16.42	16.57	-1.57555	0	-2.17753	0	-0.917597	1.88921e-204	-0.601985	4.39586e-34	0.65795	1.77454e-62	1.25993	1.12648e-180
CL2347.Contig7_All	17.02	23.74	9.45	17.72	32.88	22.66	17.44	16.7	21.18	5.58	7.14	10.4	0.546818	1.90534e-76	0.147342	1.69282e-06	-1.11006	3.78955e-176	-0.399476	1.63296e-43	-1.65688	0	-1.2574	2.8215e-236
CL2351.Contig2_All	23.31	38.42	13.3	61.11	44.04	39.68	43.48	46.13	42.55	9.55	22.09	22.14	0.956072	1.26764e-122	0.840206	3.81202e-91	-0.459362	4.1939e-19	-0.115866	0.000400759	-1.41543	2.85157e-229	-1.29957	4.50504e-185
CL238.Contig2_All	5.87	17.51	16.1	97.74	81.62	75.32	172.27	149.21	192.16	6.26	3.28	6.43	2.69312	0	3.71092	0	-1.29679	7.93085e-126	1.0178	0	-3.9899	0	-5.00771	0
CL2392.Contig9_All	9.16	7.49	12.13	12.27	6.24	6.21	18.5	12.47	12.82	5.76	20.52	24.07	-0.214512	6.22192e-05	0.616132	2.62553e-36	0.819036	7.52517e-68	0.830644	7.43229e-60	1.03355	1.16734e-99	0.202904	7.53784e-07
CL2400.Contig1_All	57.84	44.76	99.06	34.17	11.9	26.29	11.45	27.72	21.54	27.28	47.08	36.12	-1.47394	0	-1.71752	0	-0.860802	0	-0.243579	1.63942e-14	0.61314	2.06284e-111	0.856719	3.55998e-197
CL2400.Contig18_All	132.03	71.77	167.18	57.95	27.26	44.26	22.89	42.37	30.91	52.97	86.99	68.06	-1.51372	0	-1.93221	0	-0.825683	0	-0.418493	5.85676e-55	0.688034	2.3224e-215	1.10653	0
CL2400.Contig2_All	41.15	42.8	82.85	30.25	8.55	23.33	8.63	25.66	22.83	28.49	55.16	42.79	-1.42034	0	-1.53168	0	-0.392378	4.60978e-75	-0.111339	0.000365728	1.02796	0	1.1393	0
CL2400.Contig4_All	60.66	16.82	57.84	26.11	15.41	7.22	16.01	7.16	8.5	23.12	45.17	43.31	-1.46651	0	-2.08576	0	-0.266507	3.77072e-23	-0.619245	4.25037e-38	1.2	5.61254e-261	1.81925	0
CL2411.Contig6_All	59.11	41.64	62.1	20.78	23.95	24.93	13.1	16.92	15.16	26.94	47.72	39.97	-1.22227	0	-1.83867	0	-0.499084	3.47833e-116	-0.616397	9.43727e-73	0.723186	2.92168e-159	1.33958	0
CL2412.Contig1_All	24.57	39.12	26.83	35.74	27.53	22.03	27.63	25.83	36.36	53.11	94.78	100.52	-0.0806193	0.00479388	0.000971723	0.255063	1.46829	0	0.081591	0.00453947	1.54891	0	1.46732	0
CL2415.Contig7_All	21.84	21.95	21.39	43.42	42.99	31.42	36.33	36.12	34.6	7.47	13.61	15.35	0.858192	6.23745e-183	0.727323	1.06061e-125	-0.828912	1.49161e-96	-0.130868	3.33613e-07	-1.6871	0	-1.55624	0
CL2418.Contig10_All	36.07	32.3	34.4	219.45	143.74	106.61	98.22	125.79	141.28	4.48	2.77	3.86	2.19788	0	1.84209	0	-3.20062	0	-0.355792	5.43819e-143	-5.39849	0	-5.0427	0
CL2423.Contig7_All	21.97	15.71	10.15	13.44	25.71	17.91	4.63	11.02	13.03	3.45	6.54	5.88	0.256107	9.07119e-16	-0.726741	2.81417e-81	-1.58596	1.4492e-285	-0.982848	2.15736e-160	-1.84206	0	-0.859214	2.84682e-66
CL2423.Contig8_All	28.92	28.42	30.26	31.74	45.97	35.04	11.88	32.98	35.05	8.52	19.11	13.36	0.366045	1.44791e-56	-0.120623	8.3427e-07	-1.08993	7.54561e-297	-0.486668	3.84553e-94	-1.45597	0	-0.969306	1.18288e-224
CL2473.Contig12_All	47.83	38.83	28.2	33.71	69.74	54.07	12.67	35.07	35.81	14.55	23.6	21.8	0.458277	2.81907e-77	-0.443896	1.91521e-53	-0.928506	1.23246e-194	-0.902173	1.54723e-251	-1.38678	0	-0.48461	1.10889e-46
CL2480.Contig6_All	44.38	73.76	45.07	96.98	75.04	64.75	116.81	108.31	112.89	26.11	40.34	83.79	0.541557	1.05697e-136	1.0631	0	-0.104831	6.22575e-06	0.521544	8.91041e-182	-0.646387	1.67887e-188	-1.16793	0
CL2493.Contig1_All	35.83	20.66	35.63	29.37	26.37	30.95	9.04	30.96	30.96	10.3	15.01	8.67	-0.0849711	0.000187986	-0.363753	3.40412e-46	-1.43411	0	-0.278782	4.36569e-27	-1.34914	0	-1.07036	7.32697e-237
CL2494.Contig1_All	10.65	9.42	9.51	15.98	28.13	17.98	13.94	19.55	14.45	7.62	10.18	10.9	1.07187	1.38759e-160	0.708706	8.50667e-63	-0.0354218	0.112485	-0.363162	5.28345e-25	-1.10729	1.94116e-170	-0.744128	1.37251e-68
CL25.Contig10_All	8.2	15.03	8.35	22.5	21.07	14.91	16.53	18.25	14.57	5.42	11.4	12.03	0.891633	5.23467e-163	0.652484	5.5219e-81	-0.12431	0.000488261	-0.23915	2.68677e-16	-1.01594	1.05409e-203	-0.776793	7.28382e-110
CL2500.Contig14_All	4.53	9.29	10.43	21.28	8.6	7.9	32.37	19.41	25.53	9.62	17.81	32.2	0.64515	5.48518e-40	1.68023	0	1.30962	4.52968e-201	1.03508	7.54038e-177	0.664465	2.83872e-66	-0.370618	2.59887e-30
CL2500.Contig8_All	7.92	7.54	10.08	13.28	8.93	9.94	18.3	14.87	17.96	8.17	13.63	17.14	0.334981	9.69417e-18	1.00677	1.76262e-182	0.614774	3.27112e-61	0.671794	6.35275e-92	0.279793	5.63496e-16	-0.392001	6.44181e-36
CL2505.Contig4_All	16.52	17.06	11.06	21.1	23.05	20.11	8.12	12.53	17.21	5.98	11.67	9.99	0.529455	7.26491e-40	-0.224768	4.6048e-07	-0.681931	1.27021e-43	-0.754223	7.91838e-73	-1.21139	2.79524e-160	-0.457163	3.67531e-19
CL2522.Contig65_All	13.99	13.07	31.19	15.52	14.16	15.44	6.68	12.03	5.89	10.44	25.6	19.04	-0.367212	1.4096e-52	-1.23393	0	-0.0785371	0.000204063	-0.86672	2.34098e-185	0.288675	6.70842e-33	1.15539	0
CL2538.Contig14_All	172.75	98.09	195.72	55.15	25.67	40.57	15.64	28.66	31.97	100.3	233.05	161.11	-1.93862	0	-2.60379	0	0.0880352	1.45833e-21	-0.665166	1.13075e-224	2.02666	0	2.69182	0
CL2546.Contig18_All	11.37	8.03	10.28	15.16	16.19	12.38	6.55	16.88	15.69	2.88	3.22	3.5	0.561932	1.89817e-43	0.411147	6.42733e-23	-1.62029	2.59666e-165	-0.150785	3.1647e-05	-2.18223	0	-2.03144	4.9385e-297
CL2605.Contig1_All	22.72	23.37	20.63	32.26	32.06	19.35	10.76	21.81	20.67	5.55	12.83	9.39	0.330841	5.04632e-25	-0.311558	3.06838e-18	-1.25609	7.69092e-196	-0.642399	7.77712e-80	-1.58693	0	-0.944529	7.26183e-100
CL2605.Contig2_All	35.34	37.56	33.64	40.88	28.58	19.53	17.37	24.15	33.29	4.07	14.09	13.38	-0.254839	2.85722e-20	-0.498841	1.804e-66	-1.74677	0	-0.244002	5.66911e-16	-1.49193	0	-1.24793	6.2237e-224
CL2605.Contig5_All	48.38	42.33	49.28	84.79	75.89	66.48	24.81	54.85	52.25	9.79	20.96	19.12	0.702175	6.4832e-273	-0.0719834	0.000659817	-1.48044	0	-0.774158	0	-2.18261	0	-1.40845	0
CL2615.Contig27_All	7.55	5.04	14.6	10.28	5.27	4.79	13.33	8.33	10.36	15.73	35.43	31.27	-0.41344	7.45228e-14	0.244258	4.77499e-07	1.60908	0	0.657697	1.0359e-34	2.02252	0	1.36482	1.50986e-289
CL2616.Contig16_All	27.02	63.91	39.13	21.74	26.37	27.16	4.53	17.37	15.22	18.25	23.49	22.5	-0.787868	0	-1.79729	0	-1.01352	0	-1.00942	0	-0.225651	1.02206e-22	0.783771	9.93007e-176
CL2617.Contig22_All	55.23	18.71	75.79	5.27	6.8	6.76	3.84	8.3	3.09	19.43	61.34	43.44	-2.98973	0	-3.28238	0	-0.26341	2.31558e-39	-0.292654	1.6319e-07	2.72632	0	3.01897	0
CL2617.Contig4_All	56.34	27.7	74.52	12.12	10.98	8.16	8.85	10.6	4.54	45.94	123.3	127.63	-2.33822	0	-2.7097	0	0.915705	0	-0.371472	4.4868e-12	3.25393	0	3.6254	0
CL2622.Contig4_All	8.42	14.81	7.75	17.6	13.8	11.54	15.78	14.45	13.93	13.08	25.93	31.4	0.474287	5.0805e-32	0.519733	1.56262e-38	1.19267	2.82487e-248	0.0454455	0.0632499	0.718383	1.82702e-107	0.672938	2.4209e-95
CL2627.Contig7_All	42.7	28.79	33.13	47.94	45.48	36.56	13.2	47.06	44.18	17.83	19.77	23.73	0.31682	2.99216e-43	0.0117634	0.173914	-0.762595	5.42745e-168	-0.305057	3.53179e-40	-1.07941	0	-0.774358	3.87268e-173
CL2629.Contig3_All	9.8	7.73	11.48	24.56	20.68	13.21	10.31	8.68	8.07	3.1	7.7	10.91	1.01447	8.86189e-137	-0.0907878	0.0223462	-0.408434	2.31222e-15	-1.10525	2.84226e-156	-1.4229	6.19324e-234	-0.317647	1.00999e-09
CL2631.Contig2_All	17.76	18.65	11.28	9.39	13.64	5.57	34.25	36.85	35.61	17.9	19.61	18.57	-0.730086	8.08992e-30	1.18315	5.19555e-144	0.249888	1.6485e-06	1.91324	3.21846e-290	0.979974	1.80252e-57	-0.933263	8.86091e-99
CL2632.Contig6_All	30.1	21.7	21.44	7.87	5.82	3.94	7.88	8.33	9.36	23.39	43.43	58.87	-2.05034	0	-1.50908	0	0.788016	2.76799e-230	0.541265	1.92367e-25	2.83836	0	2.29709	0
CL2634.Contig22_All	8.12	10.14	10.77	23.91	11.6	14.48	12.05	20.71	21.54	3.46	5.79	5.5	0.78731	9.3878e-118	0.912128	7.85748e-164	-0.971587	2.06332e-98	0.124817	8.98066e-06	-1.7589	0	-1.88371	0
CL2661.Contig1_All	343.99	355.46	508.04	470.66	250.33	274.33	881.41	557.08	645.83	702.27	972.05	1180.28	-0.271806	1.14676e-142	0.803699	0	1.25736	0	1.07551	0	1.52917	0	0.45366	0
CL2661.Contig2_All	141.61	130.41	192.4	140.26	93.14	108.23	198.05	166.64	176.55	225.93	286.92	310.82	-0.439824	0	0.227037	1.29063e-120	0.83256	0	0.666862	0	1.27238	0	0.605523	0
CL2662.Contig4_All	9.68	15.39	10.28	26.55	18.39	14.34	19.7	23.93	22.4	3.59	7.7	10.82	0.749932	6.24563e-87	0.912389	1.04448e-134	-0.667132	2.25054e-43	0.162457	2.88142e-07	-1.41706	9.10243e-245	-1.57952	0
CL2666.Contig1_All	426.62	396.44	379.73	805.96	688.85	458.18	430.09	710.54	698.94	101.96	133.69	70.15	0.704676	0	0.62893	0	-1.96707	0	-0.075746	7.00189e-26	-2.67175	0	-2.596	0
CL2668.Contig25_All	9.33	12.58	17.7	3.49	12.85	11.95	8.18	16.74	27.71	9.18	28.56	20.91	-0.483858	2.72123e-22	0.42298	3.66625e-23	0.576498	4.52796e-44	0.906838	1.61633e-84	1.06036	9.4123e-123	0.153517	2.79004e-05
CL2670.Contig1_All	8.3	14.49	6.59	12.4	17.6	13.03	6.71	12.1	12.78	4.13	6.31	8.5	0.55395	3.32111e-31	0.118741	0.00768138	-0.622084	1.0334e-26	-0.435209	1.25232e-20	-1.17603	1.79107e-109	-0.740825	2.41824e-38
CL2676.Contig10_All	740.99	1122.26	928.44	690.62	318.74	523.64	457.06	737.35	641.92	888.34	1154.86	1198.28	-0.858995	0	-0.585747	0	0.229112	1.69632e-300	0.273248	5.45483e-237	1.08811	0	0.814859	0
CL2694.Contig1_All	12.21	13.24	8.85	16.31	17.44	17.96	9.42	12.31	13.52	5.34	9.39	10.61	0.595247	5.88798e-48	0.0507605	0.0790961	-0.427356	1.03176e-18	-0.544487	6.73308e-41	-1.0226	2.94289e-120	-0.478117	3.52945e-23
CL270.Contig1_All	30.6	38.51	55.38	28.58	13.39	14.82	15.41	24.19	21.87	10.69	18.71	26.57	-1.12901	0	-1.01051	0	-1.14845	0	0.1185	2.23115e-07	-0.0194364	0.0680715	-0.137936	2.04519e-09
CL270.Contig2_All	16	16.03	20.26	13.31	5.92	8.01	5.4	9.74	13.12	2.14	6.37	6.5	-0.937423	5.31415e-234	-0.881233	2.41659e-210	-1.796	0	0.05619	0.0290447	-0.858578	3.30464e-107	-0.914768	5.79246e-123
CL270.Contig4_All	27.28	19.64	18.15	15.15	9.63	12.94	6.85	11.92	11.81	3.8	9.66	8.73	-0.782998	9.78597e-191	-1.08109	0	-1.54783	0	-0.298096	1.48259e-20	-0.764837	3.93996e-108	-0.466741	2.56602e-37
CL2701.Contig4_All	10.29	11.82	8.93	17.49	16.63	16.04	4.73	11.79	10.09	3.4	6.12	5.37	0.69516	5.1199e-85	-0.209473	2.62024e-07	-1.05439	6.92174e-107	-0.904633	3.37526e-132	-1.74955	0	-0.844917	2.70276e-64
CL2707.Contig3_All	13.32	17.11	9.55	32.14	31.58	30.67	16.82	22.57	25.76	4.3	7.13	5.92	1.242	0	0.713311	4.76238e-117	-1.19891	3.26028e-171	-0.528686	5.89533e-99	-2.44091	0	-1.91222	0
CL2716.Contig9_All	11.05	17.41	13.14	25.28	22.69	18.46	27.92	28.5	26.22	6.08	9.56	13.81	0.677989	2.13333e-96	0.998531	1.69742e-230	-0.49085	3.54668e-35	0.320542	1.49133e-31	-1.16884	1.08799e-240	-1.48938	0
CL2718.Contig1_All	8.04	7.28	6.54	17.65	15.47	17.71	5.07	15.34	18.77	1.27	5.6	3.84	1.22132	4.20278e-135	0.856208	2.44397e-59	-1.01923	7.47092e-45	-0.365109	8.84303e-18	-2.24055	0	-1.87544	9.52602e-197
CL2718.Contig2_All	10.76	9.8	7.86	13.69	14.93	17.3	9.45	12.72	14.04	2.37	6.66	7.46	0.696102	3.62956e-41	0.363836	2.23539e-11	-0.772343	3.28762e-31	-0.332266	5.95265e-12	-1.46845	6.88359e-137	-1.13618	1.91579e-73
CL2732.Contig4_All	5.79	3.85	7.33	12.92	14.23	11.45	13.76	19.17	16.7	7.08	6.74	7.71	1.18699	2.27697e-254	1.55502	0	0.347707	3.2538e-18	0.368029	3.51567e-43	-0.839283	2.6444e-145	-1.20731	0
CL2735.Contig6_All	14.64	24.36	11.54	15.62	22.33	24.24	6.38	15.04	9.26	7.1	10.54	7.23	0.300949	3.18576e-20	-0.706003	6.43076e-73	-1.01735	1.20963e-135	-1.00695	4.12937e-162	-1.3183	1.90857e-251	-0.311348	1.17886e-11
CL2738.Contig3_All	13.89	22.53	11.21	24.58	29.52	26.16	13.59	21.84	21.38	6.81	11.92	12.19	0.757902	2.41229e-67	0.272496	5.9093e-09	-0.608758	2.07061e-28	-0.485406	3.23959e-31	-1.36666	1.00731e-175	-0.881254	1.3504e-62
CL274.Contig10_All	21.99	22.99	20.19	35.68	36.02	28.38	34.25	38.44	34.08	12.99	15.02	18.58	0.620852	1.64263e-198	0.718714	1.06442e-273	-0.479263	2.30585e-82	0.0978623	4.68985e-08	-1.10011	0	-1.19798	0
CL2747.Contig16_All	8.04	9.36	8.93	10.96	6.57	7.05	22.43	19.43	10.29	10.83	17.03	16.06	-0.0951418	0.014492	0.994869	1.53469e-141	0.744649	2.67338e-74	1.09001	8.26272e-164	0.83979	2.90824e-91	-0.250221	2.18889e-13
CL2752.Contig2_All	5.27	8.14	4.72	17.23	11.32	8.19	16.13	17.08	21.03	3.02	7.76	7.56	1.02531	2.32591e-52	1.59688	7.54421e-151	0.0312159	0.16229	0.571575	5.2671e-29	-0.99409	1.70945e-50	-1.56567	2.25306e-147
CL2753.Contig1_All	11.19	13.56	9.23	13.97	19.71	16.53	10.15	12.41	10.26	5.65	8.83	8.9	0.567483	5.58064e-30	-0.033718	0.153895	-0.527465	1.15708e-18	-0.601201	7.03249e-33	-1.09495	6.2217e-90	-0.493747	2.51866e-16
CL2756.Contig12_All	26.74	12.02	22.73	35.81	19.8	30.88	6.98	10.67	9.82	3.1	9.27	5.7	0.496387	8.64366e-64	-1.15039	1.99471e-189	-1.76023	0	-1.64678	0	-2.25662	0	-0.609837	1.18998e-30
CL2756.Contig6_All	27.07	18.06	15.89	30.92	15.99	20.42	4.57	13.17	15.5	4.47	9.77	5.98	0.146405	1.61854e-07	-0.864263	3.75337e-141	-1.58792	0	-1.01067	5.71759e-202	-1.73432	0	-0.723653	1.85754e-58
CL2756.Contig7_All	24.87	17.82	18.76	25.31	14.45	18.11	3.08	11.57	10.41	3.95	8.72	3.66	-0.0824536	0.00210401	-1.27991	6.53113e-266	-1.9077	0	-1.19746	4.86318e-226	-1.82525	0	-0.627789	8.24724e-35
CL2756.Contig8_All	33.22	34.94	27.54	48.92	25.39	27.47	14.82	21.98	16.96	10.08	22.13	13.03	0.0927457	1.89578e-06	-0.823119	6.55124e-267	-1.0776	0	-0.915865	0	-1.17034	0	-0.25448	2.09729e-19
CL277.Contig4_All	18.35	15.39	14.63	7.18	7.79	16.77	3.21	9.89	10.95	7.2	9.07	7.38	-0.607528	9.40017e-159	-0.999285	0	-1.03026	0	-0.391756	1.05141e-47	-0.422735	1.22351e-55	-0.0309783	0.0758579
CL2784.Contig9_All	60.82	45.37	78.28	31.09	15.72	26.71	41.94	44.46	26.62	48.09	70.21	63.16	-1.32342	0	-0.696782	5.24083e-271	-0.0172477	0.0817984	0.626634	4.35693e-139	1.30617	0	0.679535	1.43919e-257
CL2787.Contig5_All	2.22	7.29	4.95	18.42	13.26	4.54	30.45	15.89	17.83	6.86	11.09	13.1	1.33001	8.76268e-93	2.16014	0	1.11449	1.59615e-61	0.830136	2.48192e-76	-0.215514	1.30509e-05	-1.04565	2.28203e-112
CL2788.Contig2_All	46.75	50.94	48.17	17.57	39.13	22.15	6.66	18.99	10.81	31.78	23.77	48.56	-0.886939	0	-1.98665	0	-0.47921	2.08344e-143	-1.09971	0	0.407729	1.72002e-77	1.50744	0
CL279.Contig3_All	9.53	17.38	9.89	29.7	16.33	10.08	25.36	25.34	29.63	19.66	32.7	36.36	0.61765	2.81167e-23	1.14944	8.92727e-91	1.29081	8.84408e-121	0.53179	2.26386e-25	0.67316	3.06929e-42	0.14137	0.000653352
CL2800.Contig1_All	20.98	17.11	22.39	46.03	23.38	31.43	12.75	31.08	27.17	8.45	18.25	14.72	0.741234	1.44379e-237	0.242237	6.20309e-23	-0.541494	5.83247e-83	-0.498998	2.47647e-117	-1.28273	0	-0.783731	7.21259e-186
CL2818.Contig15_All	12.5	13.19	20.63	17.27	8.21	10.42	33.26	23.75	23.67	18.46	38.57	38.48	-0.36299	1.25248e-19	0.808814	6.48558e-134	1.05245	1.56011e-247	1.1718	5.14425e-246	1.41544	0	0.243638	3.09584e-19
CL2822.Contig13_All	11.82	19.17	6.85	18.84	33.5	19.63	4.4	11.03	16.47	5.25	5.72	4.98	0.929565	2.13992e-164	-0.23587	8.81862e-09	-1.24015	4.59898e-139	-1.16543	3.19908e-236	-2.16971	0	-1.00428	2.12973e-84
CL2822.Contig14_All	8.16	11.58	4.16	14.68	22.69	17.58	7.94	10.72	20.76	4.38	5.05	7.72	1.2023	0	0.727104	2.54137e-123	-0.473542	3.22378e-36	-0.475199	2.35761e-80	-1.67584	0	-1.20065	1.46163e-284
CL2830.Contig4_All	23.17	16.87	18.09	20.63	29.45	26.62	10.83	17.72	17.33	8.33	14.27	12.96	0.400858	1.22695e-79	-0.333439	1.92945e-43	-0.705076	5.37162e-167	-0.734297	1.78087e-233	-1.10593	0	-0.371637	1.48847e-42
CL2833.Contig8_All	44.48	82.34	43.1	56.26	48.26	64.65	46.14	54.49	51.89	17.46	26.64	36.72	-0.0031278	0.217965	-0.143731	4.50184e-11	-1.06121	0	-0.140604	1.18407e-10	-1.05808	0	-0.917478	4.43809e-264
CL2838.Contig5_All	23.83	10.2	21.03	12.24	14.43	10.29	10.25	3.73	6.06	7.27	24.7	22.03	-0.572553	7.87148e-70	-1.45601	0	-0.0217743	0.112066	-0.883453	4.4836e-99	0.550779	5.21796e-65	1.43423	0
CL2842.Contig14_All	46.6	36.41	19.73	67.36	36.84	20.69	36.01	73.07	33.53	8.76	16.33	13.71	0.286834	4.47917e-49	0.486227	6.6702e-147	-1.39957	0	0.199393	1.02527e-28	-1.68641	0	-1.8858	0
CL2842.Contig19_All	144.81	40.65	188.84	97.02	27.73	52.33	86.88	81.77	85.39	133.28	226.7	166.27	-1.0741	0	-0.548954	4.05937e-292	0.499198	0	0.525143	1.75245e-184	1.5733	0	1.04815	0
CL2843.Contig3_All	16.03	26.71	13.13	37.74	31.98	34.47	8.25	29.7	25.68	4.08	11.27	8.97	0.904776	5.78562e-97	0.21071	7.9078e-06	-1.1838	2.4992e-81	-0.694066	1.0219e-61	-2.08857	0	-1.39451	5.82262e-120
CL2846.Contig13_All	394.35	263.66	505.63	166.25	104.1	178.11	119.12	196.75	132.71	305.91	317.91	372.41	-1.37287	0	-1.36477	0	-0.218412	5.25634e-260	0.00809984	0.112282	1.15446	0	1.14636	0
CL2869.Contig12_All	20.96	24.78	23.15	6.77	6.9	11.31	3.19	10.48	8.04	12.17	14.29	13.1	-1.46236	0	-1.65383	0	-0.795998	3.09372e-195	-0.191467	9.26486e-07	0.66636	9.22887e-84	0.857827	6.77088e-128
CL2869.Contig18_All	35.82	62.6	41.72	14.51	14.06	17.28	9.8	19.77	19.5	26.93	35.39	33.38	-1.60999	0	-1.50428	0	-0.545367	3.5061e-183	0.105712	0.000154371	1.06462	0	0.958911	0
CL2875.Contig2_All	18.54	22.86	10.24	44.03	29.35	31.07	30.82	33.55	35.21	9.05	20.56	27.39	1.02294	4.08196e-101	0.969531	4.23172e-89	0.164608	0.000988866	-0.0534096	0.0552655	-0.858333	1.29774e-76	-0.804923	7.378e-66
CL2878.Contig3_All	6.63	10.87	6.5	13.21	16.48	12.15	26.27	17.94	17.96	3.03	6.32	9.37	0.804996	5.86768e-69	1.38125	1.29488e-242	-0.347881	2.26292e-10	0.576252	4.78919e-57	-1.15288	6.01054e-125	-1.72913	0
CL2880.Contig2_All	5.86	22.91	24.5	34.48	14.92	18.1	42.62	26.18	26.13	29.82	78.33	59.19	0.346681	1.22619e-23	0.841577	7.96794e-154	1.65942	0	0.494896	6.14593e-61	1.31274	0	0.817841	2.40206e-258
CL2880.Contig30_All	25.19	9.04	22.73	10.59	8.31	11.79	3.69	10.29	10.67	5.24	15.81	10.11	-0.890318	2.28073e-267	-1.19891	0	-0.868127	1.01843e-257	-0.308596	9.14511e-23	0.0221902	0.0737536	0.330786	2.74705e-26
CL2889.Contig2_All	50.72	42.65	43.91	46.34	60.16	60.8	13.25	38.17	28.8	18.01	24.81	18.05	0.287953	3.09114e-42	-0.759775	5.77849e-197	-1.16616	0	-1.04773	0	-1.45412	0	-0.40639	2.66455e-39
CL2889.Contig4_All	164.96	236.52	162.53	259.17	415.27	318.55	107.65	245.21	160.45	80.09	124.32	114.29	0.818856	0	-0.119758	1.80448e-23	-0.814584	0	-0.938614	0	-1.63344	0	-0.694826	0
CL2891.Contig1_All	3.76	7.69	6.95	9.59	8.48	4.28	19.38	8.47	11.61	10.89	26.04	23.81	0.288507	0.000172552	1.11687	8.35997e-56	1.74009	4.89903e-166	0.828367	1.41343e-34	1.45158	2.28306e-128	0.623213	9.44226e-33
CL2899.Contig3_All	41.33	84.94	48.68	115.54	82.79	71.9	139.39	109.45	118.06	63.77	79.85	125.69	0.631579	2.13271e-246	1.07831	0	0.633221	2.99571e-249	0.446733	1.11389e-178	0.00164212	0.141786	-0.445091	1.06047e-178
CL2900.Contig1_All	20.48	22.12	25.9	25.61	12.09	11.79	49.17	26.45	24.98	23.33	71.76	78.95	-0.46346	4.37646e-38	0.562507	8.6719e-78	1.35569	0	1.02597	8.43273e-217	1.81915	0	0.793185	7.38379e-245
CL2900.Contig14_All	10.23	9.79	13.83	12.67	7.89	5.07	26.95	11.3	9.39	10.93	24.54	25.98	-0.396452	8.02406e-21	0.496792	2.67505e-42	0.86758	1.5273e-143	0.893244	1.21605e-115	1.26403	3.00207e-264	0.370788	1.75329e-32
CL2900.Contig35_All	20.9	12.54	22.64	12.7	7.43	11.82	4.7	12.58	9.68	10.44	15.46	12.93	-0.809093	9.56854e-222	-1.04622	0	-0.527646	1.52905e-105	-0.23713	6.59077e-15	0.281447	1.79794e-24	0.518577	3.10886e-71
CL291.Contig6_All	28.82	79.81	65.19	5.99	2.58	8.57	0.6	1.89	1.02	41.88	26.05	50.72	-3.33978	0	-5.61468	0	-0.543424	3.26967e-175	-2.27491	1.13147e-164	2.79635	0	5.07126	0
CL293.Contig12_All	80.97	80.79	112.62	81.66	51.69	76.15	151.49	156.88	144.87	152.87	185.74	210.07	-0.386594	1.91866e-201	0.730485	0	1.0048	0	1.11708	0	1.39139	0	0.274313	6.34241e-212
CL293.Contig13_All	135.15	125.05	175.99	93.67	54.4	70.17	293.59	213.39	158.91	91.55	196.95	115.19	-0.995426	0	0.617013	0	-0.106946	4.98867e-22	1.61244	0	0.88848	0	-0.723958	0
CL293.Contig30_All	17.36	29.69	19.01	46.94	14.85	42.52	54.43	66.47	60.51	88.85	79.54	103.47	0.662617	4.19655e-171	1.46567	0	2.047	0	0.803052	0	1.38438	0	0.581332	0
CL293.Contig33_All	114.6	72.22	116.09	67.7	37.43	62.64	81.9	149.09	96.4	121.66	142.44	125.19	-0.849608	0	0.121563	7.10327e-36	0.365458	0	0.971171	0	1.21507	0	0.243895	3.25818e-158
CL2932.Contig30_All	105.07	49.16	127.75	48.63	13.56	30.82	47.37	42.15	58.36	103.3	222.05	207.7	-1.59555	0	-0.925972	0	0.923767	0	0.669576	2.21277e-287	2.51932	0	1.84974	0
CL2951.Contig7_All	27.91	27.36	38.36	19.3	10.44	15.13	42.68	35.86	43.51	42.95	72.1	83.87	-1.05637	9.14883e-181	0.394043	7.76837e-43	1.09878	0	1.45042	0	2.15515	0	0.704734	7.35448e-195
CL2955.Contig2_All	26.51	38.86	22.77	10.47	17.2	13.47	4.37	8.68	7	14.95	20.24	23.65	-1.0983	0	-2.1269	0	-0.578118	3.38628e-147	-1.0286	1.12988e-183	0.520183	1.49713e-82	1.54878	0
CL2955.Contig6_All	33	42.65	25.2	11.23	19.25	16.58	5.48	10.05	8.73	15.86	22.91	25.73	-1.09846	0	-2.04526	0	-0.638932	5.06884e-176	-0.946809	1.36986e-160	0.459525	1.0345e-63	1.40633	0
CL2955.Contig7_All	19.12	28.3	13.25	6.7	9.77	7.97	5.44	7.08	8.3	12.25	15.95	21.09	-1.31063	0	-1.53606	0	-0.293772	5.71863e-27	-0.225428	7.69729e-08	1.01686	1.1994e-192	1.24229	6.86057e-264
CL2966.Contig20_All	11.43	7.15	14	10.44	12.73	24.04	7.1	16.34	16.5	2.53	5.68	2.49	0.536507	1.17653e-61	0.303961	1.66964e-19	-1.60444	2.40002e-258	-0.232545	2.88598e-14	-2.14095	0	-1.9084	0
CL2967.Contig2_All	47.56	64.78	48.5	119.01	72.53	65.33	129.53	103.48	103.28	35	80.04	125.86	0.683024	1.87405e-135	1.08496	0	0.605274	1.28736e-104	0.401934	7.83743e-69	-0.0777505	0.000356389	-0.479684	1.93342e-95
CL2981.Contig30_All	6.2	11.07	8.87	15.57	20.26	19.94	11.91	27.51	17.51	4.51	8.38	8.8	1.09448	3.19941e-209	1.13514	2.26196e-227	-0.26333	1.90655e-09	0.0406562	0.0488129	-1.35781	4.17304e-295	-1.39847	0
CL2998.Contig1_All	6.31	11.65	6.95	9.34	8.74	4.53	6.31	6.69	10.04	12.12	17.25	20.73	-0.13448	0.015432	-0.098784	0.0461661	1.02117	9.66884e-76	0.0356955	0.157724	1.15565	1.96901e-92	1.11995	2.44608e-87
CL3001.Contig5_All	10.47	12.71	9.37	13.74	18.4	13.92	8.86	12.74	11.06	4.84	8.52	8.53	0.502733	2.3888e-39	0.0150881	0.195022	-0.565787	6.27792e-35	-0.487645	4.03363e-37	-1.06852	2.79656e-142	-0.580875	1.05953e-36
CL3003.Contig16_All	44.29	27.36	47.6	17.83	8.66	6.53	13.31	11.53	11.14	45.12	65.43	56.17	-1.84671	0	-1.7188	0	0.491552	1.62496e-106	0.127906	0.00186808	2.33826	0	2.21036	0
CL3005.Contig2_All	17.46	31.28	15.78	48.33	35.79	34.88	40.42	37.5	41.93	10.37	15.9	32.42	0.888985	3.33939e-121	0.910247	1.64521e-127	-0.117969	0.00279149	0.021262	0.136598	-1.00695	4.99297e-150	-1.02822	1.38878e-156
CL3005.Contig3_All	24.76	33.9	22.03	69.59	45.82	45.53	39.77	42.74	42.58	10.14	22.62	34.46	1.00224	3.89005e-198	0.650265	1.08706e-74	-0.24515	1.42787e-09	-0.351974	5.53792e-32	-1.24739	5.18716e-283	-0.895415	2.01675e-129
CL3005.Contig5_All	15.93	19.2	11	33.35	27.84	32.55	20.21	30.38	23.2	6.58	10.3	20.25	1.02788	7.62241e-128	0.696585	3.03396e-53	-0.295378	1.61934e-08	-0.331297	2.03822e-18	-1.32326	9.02921e-192	-0.991963	1.85845e-96
CL3009.Contig12_All	29.53	46.28	27.93	50.44	28.52	34.29	26.52	51.87	66.63	26.05	21.79	15.99	0.130932	2.20977e-07	0.495411	8.15446e-92	-0.694183	5.93177e-120	0.364479	1.12887e-52	-0.825115	1.0699e-176	-1.18959	0
CL3009.Contig5_All	11.99	32.98	15.05	42.71	30.23	31.79	74.16	66.64	66.51	21.69	16.81	18.29	0.80701	2.85561e-165	1.79776	0	-0.0727408	0.00977774	0.990754	0	-0.879751	1.32224e-192	-1.87051	0
CL3011.Contig8_All	320.47	277.52	488.12	375.88	233.7	235.73	516.87	442.45	447.09	443.8	665.46	677.71	-0.356252	1.08772e-296	0.385356	0	0.729401	0	0.741607	0	1.08565	0	0.344046	0
CL3017.Contig3_All	14.63	13.87	13.83	19.12	20.14	18.56	26.83	28.26	27.76	8.92	13.86	13.13	0.452047	3.02162e-47	0.976506	1.98297e-255	-0.231483	2.26255e-11	0.524458	3.98638e-87	-0.68353	1.43171e-98	-1.20799	0
CL3026.Contig1_All	10.92	17.83	5.64	34.27	51.84	37.41	10.32	17.7	33.06	4.12	5.42	7	1.84706	0	0.838721	5.16729e-95	-1.04706	3.94731e-78	-1.00833	4.50129e-257	-2.89412	0	-1.88578	0
CL3037.Contig10_All	10.94	13.16	7.99	15.58	18.31	14.4	5.51	11.86	11.92	7.52	7.16	6.56	0.594659	5.08093e-29	-0.113537	0.0201919	-0.583662	1.93899e-19	-0.708196	1.09668e-38	-1.17832	7.61763e-90	-0.470124	9.12633e-13
CL3037.Contig7_All	364.69	427.7	485.73	307.01	265.07	306.66	113.75	282.68	173.78	292.58	384.14	339.95	-0.538593	0	-1.15281	0	-0.326196	0	-0.614214	0	0.212397	2.66431e-258	0.826611	0
CL3038.Contig1_All	5.76	7.81	8.03	13.4	7.44	7.06	18.65	16.58	13.2	9.75	15.13	18.86	0.373752	1.70083e-14	1.17356	7.4478e-166	1.02617	4.22338e-122	0.799808	2.54508e-88	0.652418	1.73346e-57	-0.14739	1.50729e-05
CL3051.Contig6_All	13.81	15.63	13.03	10.98	24.01	17.34	11.7	18.32	15.02	4.49	7.99	10.89	0.301342	3.82708e-25	0.093642	0.000804106	-0.855973	1.6496e-128	-0.2077	3.26167e-13	-1.15732	4.05102e-259	-0.949615	3.28551e-162
CL3053.Contig39_All	366.46	158.65	455.71	134.71	94.47	154.68	50.33	135.29	100.56	155.28	248.65	178.89	-1.35095	0	-1.76522	0	-0.746957	0	-0.414274	0	0.603988	0	1.01826	0
CL3053.Contig41_All	670.9	303.8	811.62	369.07	229.62	278.19	196.67	342.82	291.08	406.55	631.94	587.21	-1.02353	0	-1.0958	0	-0.131611	1.32893e-184	-0.0722755	3.63289e-29	0.891916	0	0.964192	0
CL3054.Contig1_All	16.97	31.18	14.67	8.6	19.51	19.38	2.5	9.04	7.1	2.53	5.64	3.39	-0.402194	1.68849e-26	-1.73555	2.22867e-290	-2.4344	0	-1.33336	1.34492e-149	-2.03221	1.54881e-274	-0.698849	4.28907e-22
CL3064.Contig4_All	25.28	29.66	33.52	42.86	18.81	30.18	108.46	54.51	52.19	36.32	44.73	44.13	0.0590465	0.011405	1.28946	0	0.5092	4.91505e-87	1.23042	0	0.450154	4.35746e-70	-0.780263	0
CL3066.Contig4_All	14.48	26.19	24.79	53.46	27.9	20.61	65.31	54.47	58.72	19.28	30.69	57.46	0.645925	2.5967e-76	1.46078	0	0.730171	1.73452e-100	0.814854	1.18921e-197	0.0842455	0.00121551	-0.730608	5.19006e-165
CL3079.Contig22_All	36.97	9.95	44.26	5.86	3.02	5	1.72	5.36	4.72	19.18	28.34	28.18	-2.71174	0	-2.93761	0	-0.262463	1.91279e-28	-0.225872	8.81653e-05	2.44927	0	2.67515	0
CL3096.Contig2_All	86.39	52.09	112.89	59.92	21.32	30.66	61.96	62.49	51.28	109.13	178.62	159.94	-1.16183	0	-0.504177	6.06459e-150	0.841994	0	0.657654	5.25032e-170	2.00383	0	1.34617	0
CL3096.Contig6_All	33.19	19.49	43.32	20.46	10.31	14.73	17.71	25.63	25.84	35.12	57.71	49.05	-1.07282	9.49591e-280	-0.462159	2.71983e-65	0.570476	1.70254e-141	0.61066	4.71124e-78	1.64329	0	1.03263	0
CL3105.Contig11_All	19.94	40.52	14.98	39.17	45.44	42.97	16.67	42.19	24.06	8.08	12.64	15.68	0.761111	1.86719e-149	0.153763	1.16061e-06	-1.04076	1.44737e-150	-0.607348	2.01168e-100	-1.80187	0	-1.19452	1.19062e-207
CL3105.Contig2_All	13.11	12.14	7.25	25.41	26.08	18.49	9.41	19.9	14.57	9.46	15.63	11.02	1.1106	2.79077e-169	0.448871	1.65223e-23	0.15982	0.000242997	-0.661726	7.258e-71	-0.950776	1.39998e-132	-0.28905	1.96957e-11
CL3119.Contig3_All	8.54	15.51	9.43	24.64	19.31	19.17	12.34	11.43	10.03	2.02	8.97	8.32	0.919302	8.86367e-102	0.0261927	0.167501	-0.782831	2.47789e-42	-0.893109	1.61899e-96	-1.70213	5.6859e-265	-0.809023	3.02728e-45
CL3119.Contig4_All	9.75	14.32	10.72	21.69	14.07	19.33	10.95	11.67	16.42	3.49	11.26	10.77	0.666933	1.39178e-52	0.177309	8.80294e-05	-0.436132	7.90853e-17	-0.489625	9.03581e-31	-1.10307	3.06046e-122	-0.613441	4.32017e-33
CL3122.Contig12_All	13.7	8.45	12.68	8.55	7.42	9.62	21.16	14.38	19.84	5.89	10.94	14.03	-0.442094	1.76357e-24	0.674647	3.42385e-79	-0.166887	1.98067e-05	1.11674	1.86029e-183	0.275207	1.7872e-10	-0.841534	4.77677e-116
CL3122.Contig14_All	28.39	18.09	29.69	21.05	14.26	14.87	56.46	34.06	53.89	16.79	26.46	34.6	-0.598385	1.48698e-88	0.928229	0	0.0397141	0.0370131	1.52661	0	0.638099	9.62496e-103	-0.888514	0
CL3125.Contig11_All	15.23	11.68	14.65	10.79	13.02	14.33	4.97	9.38	7.61	5.77	10.04	2.81	-0.121442	0.000854657	-0.908257	2.30219e-88	-1.15483	1.6073e-131	-0.786815	6.03449e-64	-1.03339	1.13531e-101	-0.246576	3.81488e-06
CL3130.Contig1_All	14.44	35.33	19.19	18.2	24.42	22.75	15.54	23.55	25.38	11.26	6.35	11.4	-0.0759913	0.000844575	-0.0890801	0.000152226	-1.24318	0	-0.0130888	0.157214	-1.16719	0	-1.1541	0
CL3137.Contig18_All	44.3	51.62	38.42	18.55	11.42	14.32	9.99	14.13	14.1	15.03	34.04	32.3	-1.59775	0	-1.80555	0	-0.718299	2.48207e-297	-0.207798	1.79425e-11	0.879448	1.38201e-256	1.08725	0
CL3139.Contig23_All	5.02	14.53	6.4	16.43	14.39	10.93	14.27	12.27	18.84	4.93	3.91	7.3	0.687942	3.76631e-89	0.810413	6.85018e-128	-0.679064	3.3806e-55	0.122471	1.94131e-05	-1.36701	2.53133e-276	-1.48948	0
CL314.Contig19_All	8.1	18.53	8.17	21.14	20.93	17.01	21.18	24.3	19.1	7.29	10.23	13.84	0.766337	3.99195e-99	0.901913	1.1405e-142	-0.142269	0.000271173	0.135575	6.09763e-06	-0.908606	4.0278e-133	-1.04418	1.81163e-182
CL314.Contig21_All	149.14	169.69	68.93	81.15	228.16	110.98	32.87	85.3	52.68	58.44	50.24	70.57	0.118173	7.2669e-19	-1.16624	0	-1.10402	0	-1.28441	0	-1.2222	0	0.0622151	0.000738186
CL3141.Contig3_All	28.18	11.83	21.16	17.4	24.93	24.82	8.98	17.52	15.85	5.79	13.94	10.49	0.13575	1.16629e-09	-0.521195	2.5127e-93	-1.01366	1.54977e-296	-0.656945	5.88077e-154	-1.14941	0	-0.492465	1.24435e-59
CL3141.Contig5_All	14.67	8.91	8.46	8.43	19.16	19.94	5.22	9.4	10	5.16	8.2	6.03	0.569873	5.86083e-89	-0.371306	1.89999e-28	-0.720409	1.85867e-91	-0.941179	6.85262e-210	-1.29028	0	-0.349103	2.62009e-20
CL3153.Contig16_All	54.93	55.4	43.72	88.02	92.72	101.14	48.74	89.38	88.07	23.91	36.5	27.45	0.874923	0	0.56768	1.32515e-174	-0.802118	2.10703e-218	-0.307243	3.5799e-70	-1.67704	0	-1.3698	0
CL3165.Contig1_All	58.8	134.03	88.8	25.56	28.02	38.79	30.29	23.5	29.69	86.85	54.44	87.58	-1.60547	0	-1.74396	0	-0.289198	5.02983e-57	-0.138496	3.93586e-06	1.31627	0	1.45476	0
CL3165.Contig2_All	38.06	78.14	67.57	33.34	16.35	22.83	42.63	23.29	38.81	77.52	62.39	85.86	-1.33714	0	-0.805144	1.94247e-291	0.305245	1.45059e-63	0.531996	4.08235e-81	1.64238	0	1.11039	0
CL3168.Contig6_All	9.74	8.46	9.89	14.21	10.75	13.05	10.64	14.75	15.36	2.9	6.51	5.34	0.438725	1.21525e-59	0.542916	2.44003e-93	-0.926881	1.19899e-163	0.10419	1.0324e-05	-1.36561	0	-1.4698	0
CL318.Contig99_All	12.08	21.19	9.51	12.81	16.17	11.02	11.13	11.7	13.45	5.8	2.16	5.18	-0.0948614	0.00400161	-0.229463	1.32135e-09	-1.69514	6.26289e-260	-0.134602	0.000235165	-1.60028	1.36672e-224	-1.46568	2.93547e-179
CL3180.Contig13_All	36.21	35.58	40.02	21.35	14.61	16	5.07	14.79	13.08	35.8	52.62	26.64	-1.10253	0	-1.75214	0	0.0442702	0.0057496	-0.649618	3.67823e-95	1.1468	0	1.79641	0
CL3184.Contig4_All	138.81	79.06	212.39	66.47	25.06	30.46	48.08	45.64	58.51	129.59	278.27	261.3	-1.81148	0	-1.48472	0	0.650319	0	0.326763	1.63043e-32	2.4618	0	2.13504	0
CL3186.Contig9_All	62.51	55.01	67.77	25.22	21.91	17.26	18.37	11.18	11.88	26.16	52.33	76.21	-1.52211	0	-2.15681	0	-0.253354	5.02555e-58	-0.634699	4.36838e-108	1.26876	0	1.90346	0
CL3193.Contig6_All	13.49	8.18	8.19	20.92	25.03	24.18	11.53	16.58	29.45	2.47	2.35	1.86	1.23495	3.67372e-222	0.956779	1.78972e-121	-2.15518	2.76935e-210	-0.278174	2.52513e-17	-3.39014	0	-3.11196	0
CL3194.Contig24_All	104.01	169.85	172	149.55	71.79	59.5	183.81	129.93	150.63	252.66	330.82	219.2	-0.660685	0	0.0700789	4.06944e-07	0.857081	0	0.730764	0	1.51777	0	0.787003	0
CL3194.Contig60_All	19.5	17.52	21.84	12.56	5.25	5.78	10.4	14.73	14.88	27.8	34.63	24.97	-1.31507	0	-0.54932	8.69566e-86	0.573718	2.61576e-138	0.765751	4.72271e-105	1.88879	0	1.12304	0
CL3195.Contig6_All	26.66	23.75	20.45	24.28	12.74	15.44	4.13	8.45	12.92	10.77	15.88	7.04	-0.430203	5.41042e-79	-1.4674	0	-1.07062	0	-1.0372	1.64934e-270	-0.64042	7.34998e-121	0.396777	1.49336e-33
CL3203.Contig14_All	19.98	7.27	13.44	10.63	11.37	13.68	4.34	10.76	15.2	3.43	6.96	5.9	-0.18625	7.07483e-07	-0.414089	7.30579e-25	-1.31328	4.70696e-173	-0.227839	2.40368e-08	-1.12704	2.64283e-120	-0.899196	4.57507e-71
CL323.Contig25_All	18.77	10.12	23.55	6.16	3.44	4.56	0.89	3.29	3.31	12.18	19.53	17.98	-1.886	0	-2.7962	0	-0.0735617	0.00167776	-0.910204	5.78456e-54	1.81244	0	2.72264	0
CL3238.Contig5_All	16.84	16.4	18.69	7.41	6.85	7.04	5.51	5.89	8.03	14.94	24.25	21.32	-1.28135	2.50173e-136	-1.4065	1.5819e-156	0.230686	2.60381e-09	-0.125152	0.018492	1.51203	3.3944e-206	1.63719	4.32079e-230
CL3243.Contig30_All	12.1	43.88	36.89	11.55	7.46	9.45	6.67	8.49	6.15	35.13	83.45	85.93	-1.69972	4.83057e-247	-2.10274	0	1.1565	0	-0.403021	1.94798e-08	2.85622	0	3.25924	0
CL3243.Contig31_All	10.88	14.95	8.72	11.47	6.02	8.23	19.55	14.1	15.29	12.27	29.98	22.67	-0.419312	3.80897e-10	0.520222	1.74955e-19	0.92602	7.87682e-67	0.939534	1.79697e-51	1.34533	1.13989e-120	0.405799	9.13602e-17
CL326.Contig16_All	2.22	3.43	1.1	19.31	16.19	13.42	41.86	29.63	31.14	0.34	0.71	0.69	2.86081	0	3.92963	0	-1.94837	4.09493e-152	1.06881	0	-4.80918	0	-5.87799	0
CL326.Contig24_All	7.42	5.09	5.28	35.91	47.42	54.46	26.99	99.88	75.58	3.43	3.83	4.42	2.95429	0	3.52088	0	-0.602524	2.11248e-32	0.566588	0	-3.55682	0	-4.12341	0
CL326.Contig8_All	12.57	14.85	6.44	63.02	92.19	109.63	79	174.32	145.41	1.58	1.94	2.14	2.9679	0	3.56684	0	-2.57553	0	0.598942	0	-5.54343	0	-6.14237	0
CL3270.Contig13_All	10.48	12.03	13.17	22.65	22.5	21.67	20.85	27.76	24.85	2.05	2.87	2.63	0.907072	9.98326e-202	1.05001	1.76359e-282	-2.23547	0	0.142942	6.26714e-09	-3.14255	0	-3.28549	0
CL3271.Contig4_All	20.49	29.39	23.86	51.57	45.39	35.35	58.94	45.68	63.2	29.73	38.43	49.37	0.846147	0	1.19132	0	0.678745	3.95265e-212	0.345176	6.8235e-88	-0.167402	2.5084e-19	-0.512577	2.61427e-182
CL3271.Contig7_All	16.1	19.33	15.15	37.93	35.8	23.66	37.01	40.14	43.59	20.11	18.53	21.01	0.947624	0	1.26096	0	0.242349	6.50783e-24	0.313333	1.22101e-73	-0.705275	9.5434e-261	-1.01861	0
CL3290.Contig5_All	8.66	10.99	12.96	19.9	18.77	14.45	9.99	18.48	13.3	4.42	11.58	7.17	0.710133	1.47558e-40	0.377525	1.4903e-11	-0.479819	1.06411e-13	-0.332608	1.80653e-11	-1.18995	8.73278e-95	-0.857343	1.55173e-44
CL3300.Contig1_All	61.25	23.06	38.94	25.15	18.24	40.12	23.04	24.62	28.52	36.52	42.31	76.17	-0.557443	1.68892e-57	-0.677194	2.09927e-80	0.347782	9.21381e-32	-0.119751	0.000899082	0.905224	8.85842e-169	1.02498	4.76695e-206
CL3300.Contig2_All	63.68	64.43	79.54	70.37	53.07	51.82	83.56	78.4	106.13	76.38	144.42	128.31	-0.238923	2.22559e-23	0.383238	2.49194e-70	0.762703	0	0.622161	8.68543e-168	1.00163	0	0.379464	8.85514e-90
CL3309.Contig2_All	11.58	11.47	11.35	17.41	17.82	20.61	5.18	13.77	12.4	3.23	4.61	5.93	0.703721	3.79818e-44	-0.114847	0.0167054	-1.3054	6.65928e-75	-0.818567	1.5243e-56	-2.00912	6.86685e-223	-1.19055	5.6619e-60
CL3309.Contig4_All	8.03	10.73	9.7	17.01	15.24	12.76	13.54	19.92	15.72	5.03	9.07	9.67	0.667353	1.78452e-30	0.808792	7.40954e-46	-0.244748	0.000114772	0.141438	0.001977	-0.912101	1.29674e-51	-1.05354	7.87503e-71
CL3323.Contig5_All	208.8	92.65	332.02	159.62	103.39	46.75	121.1	113.74	87.67	112.58	213.94	138.31	-1.02525	0	-0.959243	0	-0.436206	6.45459e-238	0.0660102	6.6172e-05	0.589047	9.2086e-304	0.523036	2.98856e-244
CL333.Contig5_All	9.43	11.82	11.23	36.79	30.28	20.36	52.03	41.21	31.83	6.93	3.98	9.01	1.43522	1.11233e-195	1.96258	0	-0.688816	1.9745e-23	0.527359	3.52844e-53	-2.12404	0	-2.65139	0
CL3337.Contig2_All	7.43	8.24	13.77	13.8	15.76	25.69	6.51	21.01	18.13	2.79	7.18	5.34	0.907929	2.13416e-254	0.642327	1.13353e-116	-0.941866	8.51762e-146	-0.265602	1.13427e-28	-1.84979	0	-1.58419	0
CL3337.Contig28_All	38.58	30.53	48.48	76.27	37.7	58.36	47.04	66.73	80.51	16.34	31.22	29.32	0.554616	4.51436e-303	0.730798	0	-0.609418	3.66667e-246	0.176182	9.7531e-41	-1.16403	0	-1.34022	0
CL3337.Contig37_All	28.09	27.14	36.42	80.29	52.52	78.75	103.07	112.94	102.4	9.56	26.69	27.86	1.20912	0	1.80245	0	-0.511133	3.37921e-141	0.59334	0	-1.72025	0	-2.31359	0
CL3349.Contig23_All	31.78	34.45	35.24	27.25	31.26	24.61	8.47	20.61	17.35	16.65	19.96	19.21	-0.285639	4.43978e-35	-1.11571	0	-0.856494	1.03671e-248	-0.830074	1.10812e-191	-0.570855	2.0328e-101	0.259219	3.51259e-17
CL3349.Contig8_All	10.8	21.51	7.62	7.09	6.72	5.95	7.16	11.13	16.73	14.12	15.73	10.13	-1.01236	7.30327e-140	-0.181447	1.05764e-07	0.00546238	0.198016	0.83091	1.18276e-88	1.01782	9.76415e-143	0.186909	3.61779e-08
CL3362.Contig78_All	3.24	8.74	4.89	13.49	8.24	4.23	10.17	14.48	16.98	9.72	11.01	23.59	0.62642	3.49397e-34	1.31302	1.21646e-181	1.40305	1.25953e-215	0.686597	9.67312e-63	0.77663	1.68728e-83	0.0900334	0.00384929
CL3369.Contig1_All	6.44	12.38	5.23	22.87	32.89	18.18	37.01	33.87	33.64	5.67	7.82	7.14	1.62224	0	2.12753	0	-0.21481	8.303e-06	0.505283	5.43344e-87	-1.83705	0	-2.34234	0
CL3369.Contig4_All	17.65	13.96	19.01	28.79	49.09	34.65	29.97	41.46	31.36	9.72	10.76	14.37	1.15382	0	1.03145	0	-0.532021	3.98471e-59	-0.122374	1.64989e-09	-1.68584	0	-1.56347	0
CL3369.Contig6_All	17.41	27.33	17.36	31.05	47.09	27.98	49.42	34.56	40.22	29.56	24.71	27.18	0.774638	1.57782e-221	1.0052	0	0.396843	9.41558e-53	0.230563	3.04636e-29	-0.377795	1.89344e-62	-0.608358	1.63966e-170
CL3379.Contig6_All	23.58	41.91	23.94	20.74	21.39	31.78	11.91	26.73	18.13	12.24	14.37	16.8	-0.27265	3.13205e-22	-0.641261	9.75703e-101	-1.03474	9.86505e-229	-0.368611	1.67557e-31	-0.762086	4.64573e-114	-0.393475	4.9673e-28
CL3379.Contig7_All	21.79	35.53	40.34	27.87	17.94	9.98	28.7	33.33	36.65	42.34	69.2	67.55	-0.802333	4.74919e-132	0.0268207	0.102535	0.884412	1.38976e-287	0.829154	1.74972e-141	1.68675	0	0.857591	6.5332e-272
CL3380.Contig10_All	68.59	110.74	100.04	106.58	66.49	54.05	157.69	124.41	109.49	144.71	211.56	197.2	-0.294697	3.81699e-87	0.494418	0	0.992643	0	0.789115	0	1.28734	0	0.498225	0
CL3380.Contig6_All	152.48	218.46	202.42	192.42	119.16	112.89	245.6	241.67	210.23	272.25	345.74	399.09	-0.430755	0	0.288262	0	0.831438	0	0.719016	0	1.26219	0	0.543176	0
CL3389.Contig11_All	21.54	29.74	19.44	4.95	4.71	6.14	4.76	5.57	3.93	13.83	32.31	21.92	-2.1598	0	-2.30103	0	-0.0507151	0.0140266	-0.141236	0.00403022	2.10908	0	2.25032	0
CL3397.Contig9_All	26.59	13.52	27.9	11.22	8.76	10.76	4.35	8.16	11.95	11.08	30.65	21.14	-1.1417	8.63617e-172	-1.463	8.53857e-251	-0.104641	0.000713273	-0.321306	6.80604e-10	1.03705	3.92657e-138	1.35836	8.27298e-210
CL3404.Contig4_All	21.98	11.74	13.29	11.62	8.64	13.29	4.71	11.88	10.67	3.28	5.91	11.44	-0.483107	1.00683e-39	-0.773322	2.40092e-89	-1.17846	3.60392e-180	-0.290215	3.04291e-12	-0.695355	1.14109e-54	-0.40514	6.11944e-18
CL3404.Contig6_All	42.25	23.9	57.58	37.62	16.6	26.51	38.65	42.31	44.81	41.4	61.02	60.05	-0.611397	1.27833e-123	0.0338483	0.0460673	0.401123	8.77885e-77	0.645245	2.21112e-138	1.01252	0	0.367275	4.05477e-65
CL3409.Contig26_All	24.6	20.74	31.02	12.99	13.46	14.44	18.79	25.63	19.55	21.93	39.41	67.51	-0.898422	9.91245e-158	-0.243897	3.33862e-16	0.764991	2.97204e-204	0.654525	2.02946e-77	1.66341	0	1.00889	0
CL3422.Contig5_All	16.08	25.75	9.74	16.1	27.17	27.25	5.85	12.37	19.69	5.04	6.45	7.45	0.453564	4.08645e-41	-0.433075	4.29109e-28	-1.43609	9.16984e-208	-0.886639	2.21521e-130	-1.88965	0	-1.00301	6.72569e-88
CL3434.Contig5_All	8.11	10.88	10.74	21.89	17.76	18.19	26.14	20.55	21.41	8.67	17.32	19.73	0.962211	8.93826e-204	1.20021	0	0.625914	2.40439e-78	0.238001	1.84808e-20	-0.336297	5.31713e-33	-0.574298	5.07805e-99
CL3434.Contig9_All	14.87	13.98	16.77	26.12	21	27	18.93	19.25	21.12	7.15	8.93	19.88	0.702345	4.14412e-168	0.384347	2.90898e-46	-0.335712	1.38687e-28	-0.317999	1.52563e-40	-1.03806	0	-0.720059	2.07266e-141
CL3448.Contig1_All	72.45	99.07	79.87	172.82	123.56	121.8	180.97	162.35	175.32	38.39	64.73	70.61	0.740081	0	1.06086	0	-0.518333	1.89623e-106	0.320777	2.75735e-90	-1.25841	0	-1.57919	0
CL3448.Contig4_All	13.94	20.6	15.14	37.34	32.97	29.3	50.24	41.84	44.92	5.09	9.66	12.77	1.00598	0	1.46789	0	-0.846583	3.61865e-177	0.461919	5.46031e-165	-1.85256	0	-2.31448	0
CL3451.Contig10_All	22.97	23.36	17.38	9.73	12.84	21.12	6.33	8.52	12.98	5.35	11.45	8.88	-0.543437	3.50843e-81	-1.18795	1.77903e-304	-1.30636	0	-0.644512	2.24188e-75	-0.762924	3.31028e-102	-0.118412	0.00104449
CL3451.Contig2_All	27.69	29.75	20.57	5.13	11.56	18.56	1.92	4.63	6.45	5.8	12.55	6.31	-1.14574	2.61797e-274	-2.57442	0	-1.65657	0	-1.42867	1.83744e-174	-0.510826	7.50312e-33	0.917848	6.26736e-62
CL3451.Contig38_All	130.91	180.86	83.13	65.55	95.62	137.41	60.28	74.11	74.86	45.43	89.68	50.48	-0.401833	6.76557e-199	-0.906095	0	-1.0838	0	-0.504261	2.02518e-227	-0.681966	0	-0.177705	3.85544e-24
CL3451.Contig6_All	75.02	176.26	63.28	61.5	66.21	51.88	43.69	46.08	67.38	56.43	134.99	130.49	-0.802651	1.1616e-238	-0.983319	0	0.0505179	0.00482832	-0.180668	2.5724e-10	0.853169	6.53991e-276	1.03384	0
CL3452.Contig1_All	37.14	36.23	46.17	90.73	73.9	70.67	81.56	103.54	97.39	24.83	30.76	34.74	0.981267	0	1.25342	0	-0.394531	2.6112e-47	0.272149	6.02815e-55	-1.3758	0	-1.64795	0
CL3455.Contig23_All	18.37	17.92	20.73	5.1	1.96	4.34	1.84	4.79	4.26	24.99	39.34	28.7	-2.31748	0	-2.37517	0	0.712242	1.48961e-145	-0.0576907	0.113444	3.02972	0	3.08741	0
CL3456.Contig1_All	32.41	31.5	34.92	10.66	10.33	11.52	4.76	7.02	7.63	11.25	39.11	31.71	-1.60138	0	-2.33762	0	-0.260023	2.35046e-22	-0.736243	4.65534e-47	1.34136	0	2.0776	0
CL3459.Contig7_All	17.36	24.93	5.93	5.97	15.77	16.64	14.05	7.57	10.18	1.08	3.02	1.83	-0.328733	4.27262e-22	-0.596319	2.38816e-62	-3.01658	0	-0.267586	1.08159e-12	-2.68785	0	-2.42027	0
CL3481.Contig13_All	9.61	7.89	7.03	16.5	11.87	19.8	27.32	11.22	17.85	4.77	13	10.74	0.978499	2.8116e-71	1.21202	4.97945e-117	0.229616	8.17079e-05	0.233521	8.23251e-08	-0.748884	1.66827e-46	-0.982404	3.30409e-84
CL3481.Contig19_All	20.13	27.3	19.3	42.74	38.31	35.47	19.59	41.17	28.14	6.35	13.35	19.42	0.809677	4.15996e-106	0.434678	3.82283e-28	-0.753255	1.01685e-54	-0.374999	1.06085e-27	-1.56293	2.88929e-303	-1.18793	5.53288e-154
CL3488.Contig16_All	9.31	15.21	5.47	26.27	26.81	19.12	23.07	24.75	23.05	11.38	19.06	18.87	1.27204	3.44383e-164	1.2552	1.71716e-158	0.729368	2.2077e-46	-0.0168362	0.168415	-0.542673	1.89696e-40	-0.525837	1.94763e-37
CL3493.Contig13_All	29.87	49.12	19.6	35.92	73.41	55.56	32.2	36.85	52.18	15.01	22.98	23.37	0.744172	2.71763e-197	0.30897	1.05577e-30	-0.674819	1.05402e-100	-0.435202	8.84879e-76	-1.41899	0	-0.983788	8.87054e-235
CL3498.Contig1_All	8.33	8.81	6.66	19.23	14.75	14.73	6.95	11.86	19.87	4.42	10.4	10.58	1.03886	1.00665e-62	0.717761	9.11091e-28	0.110962	0.0342893	-0.321103	2.97856e-09	-0.927902	5.61675e-53	-0.606799	3.03366e-21
CL3505.Contig7_All	7	7	9.05	13.66	14.43	6.62	15	16.63	12.79	3.85	6.15	7.96	0.591751	9.50705e-63	0.953014	1.83969e-180	-0.355235	7.7184e-18	0.361263	2.93304e-33	-0.946986	6.13747e-141	-1.30825	4.61823e-301
CL3519.Contig4_All	26.09	18.82	22.22	30.82	26.04	13.54	17.74	24.36	23.93	7.49	17.44	8.77	0.0744258	0.0166191	-0.00802032	0.22269	-0.984326	2.66281e-102	-0.0824461	0.0106396	-1.05875	2.33611e-121	-0.976306	5.86255e-100
CL3521.Contig12_All	23.33	34.97	24.54	35.79	56.15	25.83	55.56	35.16	40.4	38.94	100.56	79.1	0.51359	8.61467e-47	0.678167	1.45441e-84	1.41469	0	0.164577	1.24992e-07	0.901097	1.55956e-229	0.73652	4.77104e-162
CL3521.Contig2_All	31.23	20.3	21.94	14.2	39.44	32.82	8.71	21.8	14.93	6.44	12.01	9.72	0.235601	7.38108e-21	-0.679593	1.22132e-116	-1.37744	0	-0.915194	1.70664e-227	-1.61304	0	-0.697848	2.5169e-77
CL3521.Contig5_All	11.68	11.96	13.24	17.69	14.42	14.04	9.56	14.72	12.95	6.78	6.88	8.81	0.325377	1.31287e-41	0.0202362	0.123605	-0.711664	1.57847e-135	-0.305141	7.2026e-37	-1.03704	0	-0.7319	1.26049e-143
CL3524.Contig9_All	9.46	8.94	13.52	10.54	8.31	8.06	17.8	11.49	16.05	10.12	23.98	25.08	-0.243658	3.23234e-14	0.5087	1.48681e-71	0.894956	5.11733e-251	0.752357	9.05171e-142	1.13861	0	0.386256	5.91423e-57
CL353.Contig23_All	70.06	87.67	86.15	115.9	66.96	61.78	169.76	123.69	121.97	135.42	209.52	240.96	0.0123757	0.160805	0.789143	1.39254e-284	1.28367	0	0.776767	1.70388e-276	1.2713	0	0.49453	6.84947e-176
CL3532.Contig9_All	6.82	12.13	6.46	13.16	12.87	11.82	14.13	12.61	13.81	3.66	7.52	9.05	0.577451	3.31252e-55	0.680004	2.74146e-78	-0.323316	3.01427e-14	0.102553	0.000710506	-0.900767	5.63789e-119	-1.00332	1.86632e-151
CL3536.Contig26_All	31.82	43.03	52.28	53.94	23.47	28.76	141.36	60.5	57.61	79.27	106.86	130.59	-0.256882	7.01143e-82	1.02711	0	1.3198	0	1.28399	0	1.57668	0	0.292693	8.14685e-259
CL354.Contig17_All	8.97	18.88	8.88	22.35	17.48	12.27	24.14	21.6	25.29	4.72	8.81	13.66	0.507946	1.60764e-41	0.959336	6.39386e-167	-0.424953	3.72186e-22	0.45139	2.71666e-45	-0.932899	2.19947e-118	-1.38429	4.0322e-300
CL3554.Contig2_All	12.8	11.91	15.55	14.23	17.44	16.95	5.2	20.96	17.94	3.95	6.88	5.16	0.274695	4.45028e-14	0.146143	4.53622e-05	-1.32616	1.63178e-166	-0.128552	0.000141143	-1.60085	5.46197e-266	-1.4723	1.71434e-214
CL3563.Contig4_All	31.81	28	47.29	15.14	16.02	14.17	16.34	14.41	15.1	18.27	16.91	35.74	-1.2385	0	-1.21804	0	-0.587311	6.00479e-152	0.020463	0.135982	0.65119	3.15014e-122	0.630727	7.62005e-115
CL3566.Contig4_All	12.51	13.56	9.94	20.54	19	16.42	14.38	15.92	15.21	4.49	7.67	10.77	0.638411	1.93706e-123	0.344148	1.2196e-33	-0.645636	4.70763e-82	-0.294263	8.77715e-31	-1.28405	0	-0.989784	2.35445e-213
CL3586.Contig3_All	14.18	13.38	15.88	18.33	13.9	8.56	17.33	23.48	27.72	17.61	41.31	31.8	-0.0870539	0.00431767	0.666918	1.0175e-105	1.06849	0	0.753972	2.00767e-130	1.15554	0	0.401568	1.12848e-56
CL3594.Contig4_All	115.36	49.13	130.34	146.33	56.7	119.1	128.43	178.72	176.22	31.55	55.64	53.41	0.131243	3.476e-41	0.720045	0	-1.06449	0	0.588801	0	-1.19573	0	-1.78454	0
CL3594.Contig5_All	65.8	27.36	78.55	148.93	78.86	116.92	163.66	186.16	193.3	19.16	34.58	42.74	1.00847	0	1.66687	0	-0.827097	0	0.658401	0	-1.83556	0	-2.49397	0
CL3603.Contig2_All	20.68	40.86	29.36	3.04	6.21	6.44	2.22	3.03	1.19	3.74	9.64	5.66	-2.5288	0	-3.79522	0	-2.23927	0	-1.26641	2.62196e-25	0.289533	0.000374333	1.55594	2.58421e-41
CL3615.Contig12_All	10.56	15.58	14.99	19.05	10.05	7.29	15.47	18.14	18.85	12.67	32.71	37.52	-0.170637	0.000168944	0.36429	1.02004e-16	1.02364	6.73818e-151	0.534927	5.26311e-32	1.19428	2.56601e-193	0.659348	1.07109e-71
CL3618.Contig15_All	82.34	109.34	50.75	98.23	184.69	158.77	41.4	87.07	116.14	21.14	39.84	46.5	0.867152	0	0.0240089	0.0426049	-1.165	0	-0.843143	0	-2.03215	0	-1.18901	0
CL3618.Contig16_All	33.52	42.55	16.59	42.84	62.58	61.61	30.36	36.41	78.84	9.9	17.84	24.4	0.851713	0	0.658107	4.92508e-249	-0.822402	5.18531e-235	-0.193606	1.72498e-30	-1.67411	0	-1.48051	0
CL3618.Contig20_All	15.92	14.57	8.28	12.83	29.61	28.5	5.44	10.94	19.87	3.35	4.74	3.99	0.87204	1.75907e-254	-0.089842	0.00121739	-1.67825	0	-0.961882	2.12891e-298	-2.55029	0	-1.58841	0
CL3630.Contig10_All	63.73	33.8	60.13	24.33	20.76	36.22	9.76	33	26.68	34.71	37.62	29.55	-0.952288	0	-1.16727	0	-0.622536	1.34864e-152	-0.214981	2.04519e-12	0.329752	1.37875e-32	0.544733	1.60795e-78
CL3630.Contig13_All	69.25	102.97	151.52	109.53	66.86	50.48	123.48	124.79	120.85	168.11	232.77	244.64	-0.507714	7.81935e-193	0.201002	5.8568e-40	1.0053	0	0.708716	0	1.51301	0	0.804298	0
CL3646.Contig2_All	17.01	18.67	16.36	6.47	11.46	12.9	3.67	9.21	9.07	10.93	12.81	11.71	-0.751887	9.40271e-53	-1.22832	1.03033e-116	-0.543455	1.06753e-30	-0.476435	3.93692e-15	0.208431	2.49695e-05	0.684866	1.31644e-31
CL3646.Contig5_All	5.79	14.41	6.46	8.67	6.01	6	25.38	10.15	15.62	13.78	26.77	28.52	-0.360832	1.55348e-07	0.952415	2.52774e-64	1.3882	9.16319e-158	1.31325	1.76218e-106	1.74903	1.72767e-220	0.435788	3.63463e-23
CL365.Contig16_All	38.32	16.69	51.85	3.41	2.66	2.85	1.12	2.26	4.1	20.11	40.06	38.75	-3.57993	0	-3.82996	0	-0.105064	7.43663e-07	-0.250028	0.000568267	3.47486	0	3.72489	0
CL365.Contig4_All	128.77	83.74	174.85	34.54	20.19	35.42	12.14	43.43	38.66	47.86	82.15	67.83	-2.10032	0	-2.02691	0	-0.964128	0	0.0734057	0.000455255	1.13619	0	1.06278	0
CL3660.Contig1_All	19.9	25.11	18.35	40.98	31.83	27.35	32.65	33.06	22.46	9.65	3.86	3.66	0.666799	2.19523e-63	0.495554	8.89506e-34	-1.87402	9.52128e-205	-0.171245	1.32096e-06	-2.54082	0	-2.36957	0
CL367.Contig19_All	5.7	6.77	2.91	14.94	13.05	3.77	12.1	7.73	15.49	12.54	13.99	15.94	1.05098	3.36775e-110	1.20432	1.86129e-151	1.47219	1.62894e-249	0.153342	2.84275e-05	0.421205	2.33895e-31	0.267863	2.7961e-14
CL367.Contig3_All	11.71	10.98	10.55	13.19	10.59	11.1	26.35	18.88	25.06	6.73	15.12	17.96	0.0727798	0.0235788	1.08697	4.18316e-220	0.268371	5.0393e-12	1.01419	2.50382e-196	0.195591	1.28159e-07	-0.818598	2.48969e-138
CL3672.Contig1_All	17.7	11.05	11.46	11.11	22.4	16.41	6.97	10.29	13.92	4.03	9.68	5.82	0.316113	1.51266e-11	-0.352112	2.4026e-11	-1.03203	4.52565e-67	-0.668225	5.57045e-40	-1.34814	3.02199e-126	-0.679918	8.02507e-27
CL3681.Contig19_All	102.88	42.19	135.6	43.56	40.23	54.8	34.57	40.01	66.36	49.62	104.19	78.86	-1.01569	0	-0.986503	0	-0.265053	4.58984e-79	0.0291912	0.0385517	0.750641	0	0.72145	0
CL3683.Contig2_All	16.43	10.53	14.53	13.23	11.17	16	5.62	10.33	9.35	5.56	8.45	5.28	-0.0356823	0.095326	-0.701889	1.47452e-61	-1.09937	9.24277e-131	-0.666207	7.44476e-55	-1.06369	2.65351e-121	-0.39748	4.78855e-15
CL3683.Contig4_All	142.35	96.12	207.91	70.44	31.25	45.63	79.76	66.85	58.08	132.04	237.69	249.6	-1.59413	0	-1.11371	0	0.482573	0	0.480421	6.05583e-113	2.0767	0	1.59628	0
CL3697.Contig21_All	38.1	19.61	38.85	3.37	2.42	5.33	1.06	2.02	2.98	27.29	54.1	40.53	-3.11593	0	-3.98827	0	0.339981	9.80149e-85	-0.872342	1.0994e-42	3.45591	0	4.32825	0
CL3697.Contig25_All	21.33	18.32	26.62	11.63	7.42	7.83	6.18	10.15	9.39	16.82	32.11	27.57	-1.29897	0	-1.35712	0	0.210853	1.23924e-21	-0.0581453	0.0343838	1.50982	0	1.56797	0
CL3699.Contig10_All	11.63	5.82	4.16	13.9	12.14	8.72	10.82	25.73	19.06	5.99	3.34	9.52	0.68921	1.07317e-83	1.37518	0	-0.189042	1.89687e-06	0.685972	8.24002e-132	-0.878252	2.07364e-127	-1.56422	0
CL3700.Contig9_All	37.04	55.06	59.08	9.28	2.62	5.25	7.76	6.31	5.97	14.39	33	16.64	-3.13567	0	-2.91044	0	-1.23676	0	0.225226	1.35092e-06	1.89891	0	1.67368	0
CL3708.Contig9_All	15.35	15.02	10.96	13.83	18.36	18.93	6.65	11.91	12.42	6.11	9.2	9.18	0.307712	3.31223e-35	-0.407968	1.87455e-47	-0.750589	2.59223e-140	-0.71568	8.4464e-158	-1.0583	0	-0.342621	8.05883e-27
CL3717.Contig5_All	12.33	21.88	10.37	13.48	21.85	16.98	8.49	13.64	13.95	6.28	9.23	10.35	0.232603	8.2137e-12	-0.294947	3.86252e-15	-0.778463	5.70677e-81	-0.52755	7.62213e-48	-1.01107	9.53033e-147	-0.483516	2.59678e-29
CL3731.Contig2_All	13.31	22.22	8.19	17.72	45.38	39.77	8.52	18.13	31.6	2.61	8.15	8.68	1.23541	0	0.423451	2.16182e-35	-1.16087	6.94227e-149	-0.811957	6.59435e-191	-2.39627	0	-1.58432	0
CL3736.Contig2_All	15.51	10.49	11.73	32.76	29.77	38.44	21.21	27.66	25.98	4.04	11.17	9.79	1.42262	0	0.99722	1.40224e-251	-0.587706	2.09044e-52	-0.425401	5.20115e-76	-2.01033	0	-1.58493	0
CL3740.Contig6_All	13.65	17.51	9.08	21.36	35.04	22.21	10.86	13.12	23.16	5.53	8.49	9.74	0.967029	7.00119e-294	0.234394	4.29597e-15	-0.754105	3.49084e-100	-0.732635	1.22113e-182	-1.72113	0	-0.988499	2.33178e-184
CL3746.Contig1_All	11.57	11.82	8.93	14.3	18.37	14.72	9.14	11.93	9.76	4.86	9.76	7.95	0.555104	7.49404e-37	-0.0554429	0.0779088	-0.509582	1.86335e-22	-0.610546	3.71588e-43	-1.06469	9.19043e-111	-0.454139	8.07762e-18
CL375.Contig2_All	74.33	59.02	96.92	49.02	34.24	40.23	50.05	62.67	50.68	76.83	92.21	82.75	-0.894875	0	-0.482488	1.22892e-135	0.137046	1.98622e-15	0.412386	2.5206e-73	1.03192	0	0.619534	1.91998e-234
CL3772.Contig4_All	10.74	17.75	10.15	25.94	14.64	10.41	15.97	22.43	6.16	4.78	6.94	12.3	0.40855	7.45463e-12	0.233273	7.97401e-05	-0.663103	3.20181e-20	-0.175277	0.000978426	-1.07165	3.25614e-57	-0.896376	5.88451e-38
CL3786.Contig19_All	5.97	10.62	6.91	6.93	5.93	2.52	17.06	7.15	11.17	11.74	22.88	18.11	-0.603982	2.29905e-11	0.608529	1.68168e-16	1.18373	3.13001e-70	1.21251	6.25662e-49	1.78771	1.41003e-128	0.575202	9.8847e-22
CL3789.Contig5_All	20.09	23.55	17.04	48.98	19.71	29.03	16.65	20.84	23.02	6.07	9.9	18.36	0.693068	4.82209e-93	0.00923647	0.216311	-0.808131	4.85556e-76	-0.683831	1.95478e-90	-1.5012	0	-0.817367	1.23321e-77
CL3795.Contig6_All	28.76	40.12	26.17	44.91	33.3	61.02	18.44	47.43	32.81	7.76	8.91	6.71	0.552901	4.39539e-182	0.0662803	0.000643151	-2.01926	0	-0.48662	6.20743e-144	-2.57216	0	-2.08554	0
CL38.Contig2_All	10.69	4.98	13.47	8.53	4.15	4.21	9.62	4.54	7.02	13.79	25.48	23.91	-0.783308	2.55256e-88	-0.459909	4.41662e-35	1.12048	0	0.323399	2.39886e-14	1.90379	0	1.58039	0
CL38.Contig6_All	15.99	8.13	21.71	9.49	5	6.34	8.62	5.71	8.43	12.87	22.79	22.57	-1.13422	6.56661e-186	-1.00474	2.13781e-152	0.351394	1.18411e-31	0.129481	0.00202322	1.48561	0	1.35613	0
CL3804.Contig3_All	37.14	57.82	39.79	109.44	62.02	56.04	101.3	84.49	83.84	23.62	52.12	87.24	0.765385	4.81673e-107	1.0296	6.14346e-210	0.305011	2.94842e-16	0.264211	1.1635e-19	-0.460374	9.5316e-45	-0.724585	6.2979e-117
CL3825.Contig8_All	15.02	11.73	8.84	13.06	22.64	17.81	3.82	6.91	10.79	3.72	5.55	3.73	0.591025	3.43333e-46	-0.714226	6.5422e-43	-1.446	9.15457e-134	-1.30525	5.636e-170	-2.03702	0	-0.731771	3.84651e-28
CL3837.Contig2_All	34.26	44.06	31.66	63.06	68.62	54.84	41.29	58.45	62.51	18.91	31.21	39.08	0.768315	6.08668e-134	0.580943	2.31089e-72	-0.28415	1.5172e-14	-0.187372	2.14918e-11	-1.05247	4.14121e-228	-0.865093	2.40821e-144
CL3837.Contig3_All	23.59	23.62	18.76	45.08	35.32	40.65	24.47	28.19	38.34	10.31	15.54	14.24	0.881122	9.93544e-121	0.480714	1.54622e-32	-0.704257	5.1544e-46	-0.400408	1.11441e-30	-1.58538	1.55208e-305	-1.18497	8.96617e-149
CL3840.Contig12_All	20.11	8.3	15.17	8.51	8.36	6.25	5	7.2	4.96	9.62	19.15	11.38	-0.910975	1.07179e-93	-1.33244	3.41876e-171	-0.112206	0.00117415	-0.421461	3.62355e-14	0.798769	1.64414e-70	1.22023	3.99981e-139
CL3840.Contig13_All	39.71	12.75	27.47	9.78	14.91	15.55	3.99	10.7	10.95	4.18	8.82	11.63	-0.987527	5.98569e-156	-1.6257	0	-1.68726	0	-0.63817	2.96091e-38	-0.699735	1.51609e-45	-0.0615653	0.0716124
CL3840.Contig8_All	52.83	21.41	43.93	17.19	19.59	21.07	11.08	16.91	13.79	11.9	26.02	19.96	-1.02695	3.29259e-226	-1.48498	0	-1.01976	6.196e-225	-0.45803	2.37059e-28	0.00719596	0.131512	0.465226	1.67018e-29
CL3844.Contig9_All	151.39	304.82	90.49	106.17	171.98	145.96	171.33	277.91	392.62	302.94	368.95	710.98	-0.362877	1.41753e-137	0.637114	0	1.35344	0	0.999991	0	1.71631	0	0.716322	0
CL3852.Contig1_All	11.58	12.15	9.41	8.94	13.6	16.47	11.12	13.8	12.23	2.67	5.48	4.79	0.236722	6.02807e-10	0.174362	4.44959e-06	-1.34996	6.7261e-155	-0.0623601	0.0303831	-1.58669	1.36823e-231	-1.52432	2.60226e-208
CL3858.Contig63_All	60.47	29.71	96.88	32.48	14.94	19	14.16	18.19	21.14	54.18	105.22	99.13	-1.48991	0	-1.7985	0	0.472142	1.3907e-244	-0.30859	1.15486e-29	1.96205	0	2.27064	0
CL3863.Contig6_All	23.65	12.6	32.49	11.28	6.1	10.35	3.58	12.65	14.35	19.22	33.22	20.54	-1.30679	0	-1.15818	0	0.089186	2.63239e-05	0.148613	1.05443e-05	1.39598	0	1.24736	0
CL3863.Contig7_All	6.51	4.91	2.69	10.16	5.6	2.73	16.69	10.8	12.91	17.52	39.4	42.83	0.394543	1.17264e-11	1.5233	1.60971e-217	2.82858	0	1.12876	2.76181e-137	2.43403	0	1.30527	0
CL3870.Contig3_All	26.42	20.83	21.46	30.75	38.86	34.09	14.13	36.4	33.25	10.64	20.26	11.57	0.596367	1.81401e-110	0.299334	1.89062e-26	-0.688732	2.98858e-95	-0.297033	1.44203e-31	-1.2851	0	-0.988066	3.0735e-214
CL3873.Contig10_All	6.22	18.84	11.04	14.7	14.24	7.84	11.56	8.98	10.88	16.95	31.2	33.07	0.0308105	0.13592	-0.190987	4.14918e-05	1.17935	1.92939e-208	-0.221798	2.40279e-06	1.14854	4.23284e-200	1.37034	7.0966e-262
CL3879.Contig2_All	6.56	13.69	6.9	22.08	15.68	9.4	31.62	14.8	19.88	11.8	17.53	26.99	0.801676	7.21516e-63	1.29572	1.35611e-190	1.0639	2.41119e-120	0.49404	5.84039e-38	0.262228	1.17258e-11	-0.231812	1.16752e-10
CL3885.Contig6_All	7.86	8.83	7.01	18.11	21.75	13.42	10.77	16.03	22.56	4.77	8.28	15.81	1.17351	5.28813e-103	1.07323	2.71221e-83	0.300075	8.46047e-07	-0.10028	0.00908749	-0.873436	9.90368e-65	-0.773156	5.20821e-49
CL3889.Contig2_All	11.2	21.08	16.58	35.37	27.45	17.57	39.78	30.4	30.95	20.74	33.47	36.76	0.727553	5.60227e-43	1.07355	1.61102e-102	0.91875	2.0087e-72	0.346001	2.84839e-15	0.191197	5.13142e-06	-0.154804	0.000102944
CL3901.Contig7_All	26.01	26.53	32.13	21.24	17.02	14.65	18.93	24.86	18.59	25.34	40.71	44.8	-0.675214	1.32019e-137	-0.431243	6.95162e-62	0.394925	1.39358e-69	0.243971	5.04635e-17	1.07014	0	0.826168	4.52079e-256
CL3914.Contig9_All	13.09	11.46	9.81	16.41	18.08	17.38	8.41	12.62	12.62	4.38	7.97	6.62	0.596678	2.32712e-63	-0.0198342	0.171036	-0.851292	3.49488e-78	-0.616512	1.02309e-66	-1.44797	1.27327e-273	-0.831458	7.79517e-74
CL3915.Contig1_All	3.33	10.95	5.68	18.26	9.47	6.58	13.63	17.39	10.13	17.11	9.23	18.43	0.792272	3.1787e-18	1.07665	4.30338e-35	1.18974	1.54561e-44	0.284374	7.92478e-05	0.397466	2.19357e-08	0.113092	0.0313396
CL3927.Contig14_All	6.42	9.12	5.12	11.98	13.53	11.58	13.84	19.42	16.86	6.73	6.44	10.91	0.847594	3.88216e-62	1.29091	1.56974e-164	0.230962	1.68304e-05	0.44332	1.64644e-27	-0.616632	5.54348e-37	-1.05995	3.03835e-121
CL3927.Contig22_All	19.19	19.94	15.24	29.27	31.44	31.64	13.17	40.88	34	10.71	11.22	13.37	0.767274	7.08236e-133	0.710548	1.16809e-111	-0.614444	2.91123e-54	-0.0567263	0.013406	-1.38172	0	-1.32499	0
CL3939.Contig24_All	10.28	30.45	17.35	6.35	8.68	13.1	12.47	17.13	17.39	17.29	24.45	29.33	-1.04448	7.0811e-144	-0.294889	1.8048e-16	0.299638	1.15523e-20	0.749593	1.70342e-67	1.34412	1.20095e-264	0.594527	3.68346e-68
CL394.Contig19_All	56.19	62.43	41.7	108.03	141.65	140.52	40.64	105.32	81.83	18.08	20.9	12.68	1.28739	0	0.526008	2.10767e-109	-1.62418	0	-0.761385	0	-2.91157	0	-2.15019	0
CL394.Contig20_All	216.83	189.5	169.1	319.35	324.27	322.72	159.35	284.01	286.2	79.93	187.33	112.68	0.751456	0	0.356011	8.94061e-233	-0.591003	0	-0.395446	0	-1.34246	0	-0.947014	0
CL394.Contig23_All	14.61	15	10.31	30.65	42.93	33.11	15.23	28.74	22.2	4.74	10.55	6.41	1.42099	0	0.742977	2.3521e-90	-0.872655	2.6883e-72	-0.678014	3.05445e-122	-2.29365	0	-1.61563	0
CL394.Contig26_All	24.73	23.24	16.75	51.31	72.3	71.18	17.62	48.66	43.52	6.95	14.56	6.74	1.5926	0	0.778515	2.71832e-135	-1.18906	9.51928e-161	-0.814083	5.48461e-255	-2.78166	0	-1.96757	0
CL394.Contig35_All	12.69	5.11	11.47	36.52	25.31	16.96	16.96	29.57	25.55	2.68	6.64	6.14	1.43391	6.0378e-303	1.31415	1.24376e-243	-0.910565	4.77584e-56	-0.119758	4.46165e-05	-2.34448	0	-2.22472	0
CL3941.Contig15_All	181.22	109.58	281.16	89.63	60.94	59.02	195.85	208.72	111.76	178.18	221.83	173.55	-1.44324	0	-0.133005	3.72712e-26	0.0131872	0.0715389	1.31024	0	1.45643	0	0.146192	1.53914e-31
CL3941.Contig28_All	17.85	8.93	29.03	4.95	11.62	6.82	16.66	12.64	13.61	15.78	10.42	6.79	-1.25489	0	-0.376789	1.44735e-58	-0.75691	1.60066e-204	0.878104	4.42486e-201	0.497983	6.20538e-59	-0.380122	1.64008e-46
CL3958.Contig12_All	6.61	8.77	16.73	11.09	5.71	6.67	20.45	13.69	13.26	13.03	19.82	30.59	-0.447155	4.87661e-20	0.570176	9.12235e-44	0.992378	2.57194e-150	1.01733	6.02817e-116	1.43953	1.21362e-269	0.422202	1.79756e-34
CL3964.Contig4_All	30.86	18.99	27.16	17.59	17.11	41.11	93.19	38.73	69.79	55.78	48.3	33.91	-0.0204051	0.138116	1.39567	0	0.848467	1.01268e-213	1.41607	0	0.868872	1.13574e-222	-0.5472	3.65552e-144
CL3978.Contig1_All	17.55	17.94	14.56	43.85	36.96	33.98	17.67	22.08	27.33	6.03	8.87	9.41	1.20063	0	0.430829	2.26767e-50	-1.03522	4.16879e-172	-0.769802	1.41495e-236	-2.23585	0	-1.46605	0
CL3978.Contig2_All	17.11	16.15	15.03	32.86	24.39	26.29	11.93	17.27	21.65	6.72	9.91	10.81	0.794057	1.12657e-187	0.0831737	0.00266903	-0.809504	2.77328e-113	-0.710883	2.55671e-154	-1.60356	0	-0.892678	1.00195e-140
CL3978.Contig4_All	17.97	15.51	20.53	25.39	22.4	25.05	6.79	14.86	17.42	6.8	8.54	8.79	0.434488	1.60413e-45	-0.45564	5.12452e-37	-1.15481	6.26489e-181	-0.890128	1.10147e-157	-1.5893	0	-0.699167	1.1846e-57
CL3987.Contig4_All	18.83	14.17	12.17	15.46	25.29	21.42	9.3	14.95	20.18	5.45	11.58	10.61	0.465153	5.6039e-24	-0.00771897	0.232282	-0.695518	3.28347e-35	-0.472872	1.58048e-24	-1.16067	4.51143e-111	-0.687799	3.29996e-34
CL3988.Contig30_All	15.3	13.97	13.84	12.37	13.19	12.1	4.09	11.3	11.53	4.78	7.53	4.95	-0.193463	3.06533e-13	-0.669562	3.7767e-117	-1.31798	0	-0.476099	3.25356e-56	-1.12452	2.43231e-247	-0.64842	1.10842e-70
CL402.Contig71_All	13.32	13.15	15.32	4.58	3.1	3.44	4.04	3.91	2.51	19.55	30.13	30.01	-1.90588	5.08726e-275	-1.98703	1.25356e-289	0.939116	1.25596e-180	-0.0811577	0.0811001	2.84499	0	2.92615	0
CL4033.Contig7_All	13.1	22.69	18.03	31.31	24.41	17.2	43.4	28.78	35.59	14.72	27.51	27.53	0.44318	2.43847e-31	1.01239	7.68126e-189	0.385422	6.26452e-24	0.569206	1.46679e-70	-0.0577578	0.0183046	-0.626964	3.42053e-84
CL4059.Contig9_All	9.15	35.01	20.51	32.55	13.15	25.6	28.64	32.21	31.25	13.85	8.45	10.93	0.144578	1.13853e-06	0.519739	5.20006e-73	-0.953938	3.98834e-147	0.375161	9.75783e-41	-1.09852	1.23781e-204	-1.47368	0
CL4064.Contig31_All	69.57	89.25	66.96	22.96	22.44	26.98	16.68	18.31	19.32	31.25	65.5	66.98	-1.63818	0	-2.04469	0	-0.454384	6.82867e-123	-0.406517	4.15063e-33	1.18379	0	1.59031	0
CL4077.Contig8_All	17.03	19.98	12	34.01	40.14	42.79	13.72	23.17	29.31	5.43	9.77	12.96	1.25609	0	0.4415	3.97115e-68	-0.794074	5.80351e-143	-0.814594	0	-2.05017	0	-1.23557	0
CL4085.Contig1_All	6.56	15.65	8.68	16.75	13.46	9	24.15	17.88	18.1	13.59	23.89	27.83	0.350893	3.10161e-09	0.977668	5.98327e-73	1.09636	6.03313e-96	0.626775	9.02807e-35	0.745468	2.72326e-51	0.118693	0.0026113
CL4098.Contig11_All	58.7	62.85	65.14	3.89	5.61	6.84	0.96	2.28	0.88	19.66	24.43	24.73	-3.51352	0	-5.48979	0	-1.4349	0	-1.97628	1.34879e-183	2.07862	0	4.05489	0
CL4109.Contig10_All	21.48	27.94	18.81	44.98	34.98	33.98	22.22	33.16	35.03	9.47	17.91	22.96	0.742741	2.17452e-226	0.415169	3.29765e-64	-0.431798	1.10184e-52	-0.327572	5.99905e-52	-1.17454	0	-0.846966	1.18173e-226
CL4109.Contig4_All	10.71	12.49	8.35	13.99	22.31	21.51	19.77	18.79	16.57	6.21	10.04	10.45	0.874943	6.03681e-151	0.812696	2.57071e-127	-0.234717	2.97982e-09	-0.0622472	0.0108562	-1.10966	1.57967e-224	-1.04741	5.08885e-195
CL4110.Contig42_All	4.11	6.25	2.56	19.75	27.89	23.57	20.5	15.26	17.57	2.57	4.49	5.17	2.46434	0	2.05152	0	-0.0715428	0.0646797	-0.412823	5.014e-48	-2.53589	0	-2.12306	0
CL4115.Contig1_All	36.73	51.54	43.18	73.43	46.6	36.51	116.3	76	96.55	59.14	94.39	140.28	0.25745	3.01097e-25	1.14621	0	1.17301	0	0.888764	0	0.915555	0	0.0267917	0.0347993
CL4115.Contig4_All	9.02	10.58	8.08	12.16	17.31	17.43	17.19	24.72	20.24	9.03	11.15	16.17	0.764233	1.13214e-49	1.18283	5.92315e-134	0.406085	6.26721e-14	0.4186	2.35033e-23	-0.358149	2.43432e-14	-0.776749	9.37445e-68
CL4141.Contig3_All	41.4	79.45	38.83	78.64	85.43	75.72	60.84	87.95	95.46	21.09	20.07	49.38	0.591555	7.10479e-128	0.630396	1.839e-146	-0.801289	1.93285e-145	0.0388403	0.024781	-1.39284	0	-1.43168	0
CL4153.Contig1_All	9.58	15.57	9.5	24.7	19.4	27	22.1	25.75	21.59	3.64	4.99	7.51	1.04039	1.39568e-184	1.01361	3.9314e-173	-1.09211	1.41083e-98	-0.02678	0.103268	-2.13251	0	-2.10573	0
CL4153.Contig2_All	12.38	12.78	10.89	33.45	36.16	34.59	19.2	34.9	37.37	2.96	4.73	4.27	1.53448	0	1.35556	0	-1.58371	5.40456e-178	-0.178928	2.57869e-12	-3.1182	0	-2.93927	0
CL4158.Contig2_All	17.8	20.72	17.12	60.05	29.3	31.81	32.35	35.11	34.66	7	17.99	21.3	1.12762	0	0.886524	6.11346e-193	-0.256102	9.51542e-13	-0.241098	1.11633e-22	-1.38372	0	-1.14263	6.91472e-294
CL4160.Contig1_All	18.45	28.92	12.98	21.82	35.74	26.4	10.94	17.65	28.88	8.43	13.21	12.24	0.479623	5.51552e-41	-0.0577499	0.0454956	-0.822674	1.11214e-75	-0.537373	9.75979e-50	-1.3023	1.61338e-220	-0.764924	3.99959e-64
CL4160.Contig4_All	17.05	29.53	16.66	18.62	21	20.53	6.1	10.09	10.47	12.83	22.2	21.78	-0.0685975	0.0227319	-1.23223	3.5352e-153	-0.144045	6.85257e-05	-1.16364	2.40758e-133	-0.0754478	0.00961555	1.08819	1.137e-114
CL4163.Contig12_All	18.94	16.86	18.87	47.36	22.69	27.83	21.67	26.63	28.94	8.54	19.06	20.27	0.845777	2.21165e-130	0.511927	1.23116e-43	-0.1798	5.76701e-06	-0.33385	1.26827e-25	-1.02558	8.92753e-181	-0.691727	6.21797e-74
CL4163.Contig3_All	8.08	10.86	3.6	32.31	27.56	11.95	27.81	17.24	31.06	5.14	5.5	3.12	1.67734	2.93873e-255	1.76589	1.39958e-290	-0.703588	1.43768e-21	0.088555	0.00519308	-2.38093	0	-2.46948	0
CL4177.Contig1_All	59.55	41.96	60.18	539.21	547.27	626.08	557.35	864.61	597.38	7.28	19.95	15.35	3.40739	0	3.65441	0	-1.91857	0	0.247021	0	-5.32596	0	-5.57299	0
CL4177.Contig2_All	10.51	7.51	9.67	46.72	44.69	26.74	54.99	58.95	61.59	3.67	5.53	2.65	2.09678	0	2.67366	0	-1.21949	5.95835e-101	0.576883	1.03047e-176	-3.31627	0	-3.89315	0
CL4177.Contig3_All	461.92	262.46	487.29	1453.49	1458.62	1401.42	1209.98	2085.66	1935.01	69.63	99.85	68.34	1.83503	0	2.12216	0	-2.34275	0	0.287123	0	-4.17778	0	-4.4649	0
CL4177.Contig4_All	61.88	53.85	68.91	683.27	522.75	532.27	915.18	861.18	950.83	19.55	26.68	18.87	3.23841	0	3.89297	0	-1.49792	0	0.654567	0	-4.73632	0	-5.39089	0
CL4180.Contig3_All	10.03	8.29	10.59	13.15	8.22	9.35	8.79	17.76	15.05	3.56	8.76	7.85	0.091884	0.015635	0.538091	1.1741e-35	-0.510931	2.52223e-23	0.446207	8.49792e-26	-0.602815	6.1384e-33	-1.04902	4.34759e-110
CL420.Contig2_All	22.68	17.91	19.71	12.96	25.3	19.31	5.85	16.95	15.41	7.29	11.11	7.02	-0.0639757	0.0300072	-0.641956	5.67389e-51	-1.23807	5.86419e-152	-0.577981	1.04484e-40	-1.17409	3.91283e-134	-0.59611	1.29654e-29
CL4211.Contig1_All	122	125.48	80.78	124.21	167.25	238.94	31.53	139.79	133.71	39.26	44.05	20.92	0.695883	0	-0.0858053	3.88021e-06	-1.64584	0	-0.781689	0	-2.34172	0	-1.56003	0
CL4214.Contig1_All	28.59	27.25	29.59	13.71	13.14	14	14.92	13.53	15.8	20.25	43.12	39.29	-1.06095	1.08913e-215	-0.939952	2.77994e-176	0.273552	1.25896e-24	0.121002	0.00095473	1.33451	0	1.2135	0
CL4227.Contig10_All	13.8	15.06	13.2	9.58	8.76	13.37	2.93	9.36	7.65	6.56	11.9	8.74	-0.404734	6.08621e-25	-1.06249	3.66528e-128	-0.62283	6.45564e-53	-0.657754	8.39776e-44	-0.218096	1.50133e-07	0.439658	2.08043e-19
CL423.Contig2_All	82.2	35.81	124.95	55.19	27.18	37.55	43.46	29.74	38.28	22.99	100.55	78.16	-1.01407	0	-1.1161	0	-0.260224	1.31774e-50	-0.102025	1.14377e-05	0.753847	8.83589e-290	0.855873	0
CL4230.Contig39_All	107.6	75.28	108.85	14.96	8.29	10.49	2.63	5.47	7.2	47.13	123.41	110.22	-3.10831	0	-4.24396	0	-0.0503479	6.28664e-06	-1.13565	2.00237e-164	3.05796	0	4.19361	0
CL4243.Contig17_All	7.48	8.98	7.5	15.05	15.94	15.51	9.71	14.96	13.31	2.67	5.24	5.94	0.959595	2.55975e-121	0.675869	2.28336e-55	-0.782809	1.23203e-45	-0.283726	5.66344e-15	-1.7424	2.59362e-304	-1.45868	4.88886e-193
CL4251.Contig9_All	11.49	12.67	9.54	17.53	18.27	16.08	11.76	14.33	13.78	4.83	9.25	10.11	0.624669	1.83084e-99	0.249689	1.71016e-15	-0.47335	1.83692e-40	-0.37498	5.5534e-40	-1.09802	9.86792e-260	-0.723039	1.62053e-99
CL4267.Contig6_All	13.47	20.3	13.62	9.06	11.03	10.77	2.65	7.63	6.75	4.83	13.43	9.96	-0.616831	1.42688e-74	-1.46468	6.32542e-307	-0.743429	1.2279e-103	-0.847846	4.09239e-84	-0.126598	0.000202637	0.721249	2.91969e-59
CL4281.Contig1_All	43.65	13.55	52.33	16.16	7.26	12.48	9.27	10.83	15.59	23.34	56.38	41.53	-1.60395	0	-1.60533	0	0.156722	4.06069e-09	-0.00137293	0.238172	1.76067	0	1.76205	0
CL430.Contig11_All	9.07	20	11.21	18.59	14.2	10.86	32.05	18.83	16.55	24.35	31.25	32.71	0.119585	0.000450507	0.749401	3.5509e-114	1.13945	4.22903e-302	0.629816	2.41824e-84	1.01987	1.04553e-252	0.390051	2.94536e-47
CL4303.Contig20_All	51.51	47.97	88.63	24.28	19.44	22.99	24.57	39.2	30.12	34.44	66.8	58.15	-1.49368	0	-0.993938	0	-0.23514	4.99028e-61	0.499741	7.88759e-123	1.25854	0	0.758798	0
CL4303.Contig3_All	61.76	41.12	92.71	21.27	24.77	28.53	21.93	33.62	32.26	31.07	52.25	49.46	-1.39	0	-1.14712	0	-0.554196	8.2629e-279	0.242877	2.86368e-28	0.835806	0	0.592928	5.94658e-214
CL4303.Contig5_All	148.35	129.07	195.62	78.87	52.48	74.59	35.38	92.59	68.44	77.71	100.31	86.76	-1.19773	0	-1.25816	0	-0.834463	0	-0.0604335	5.74822e-08	0.363263	3.14924e-262	0.423696	0
CL4310.Contig11_All	27.33	18.81	25.14	9.13	8.43	14.63	4.69	8.05	9.23	12.88	15.57	19.91	-1.14461	1.24684e-235	-1.68667	0	-0.551536	6.52804e-69	-0.542063	7.02637e-31	0.593073	2.6889e-54	1.13514	1.81581e-159
CL4310.Contig2_All	32.04	25.35	32.57	11.06	20.13	16.28	6.37	10.31	11.33	21.61	25.6	27.89	-0.919318	1.83433e-148	-1.6697	0	-0.250392	1.01207e-15	-0.750378	2.84089e-56	0.668926	9.48206e-74	1.4193	1.89018e-249
CL4310.Contig23_All	18.44	51.15	21.94	33.34	23.8	12.17	46.35	29.32	30.46	59.93	96.86	156.95	-0.392061	3.64607e-17	0.236216	1.04873e-08	1.80109	0	0.628277	2.86448e-44	2.19315	0	1.56487	0
CL4315.Contig20_All	13.46	10.85	7.87	30.66	15.91	20.82	7.57	8.57	7.18	4.16	2.89	5.31	1.0708	2.69109e-184	-0.454186	4.05111e-21	-1.37177	4.9986e-131	-1.52499	0	-2.44257	0	-0.917585	5.10846e-51
CL4317.Contig12_All	6.49	3.84	10.03	17.61	13.96	10.56	18.73	13.49	8.93	5.2	13.58	13.28	1.05349	7.04789e-97	1.02573	8.70342e-91	0.664789	3.37334e-35	-0.0277562	0.1363	-0.388697	1.42039e-18	-0.360941	7.82716e-16
CL4323.Contig10_All	8.39	4.39	10.86	6.27	8.84	8.3	7.73	11.89	14.26	17.05	16.73	13.19	-0.0125654	0.193356	0.527716	3.91545e-41	0.995085	9.4042e-168	0.540282	9.41657e-43	1.00765	1.83646e-171	0.467369	1.32051e-45
CL4323.Contig8_All	14.24	4.6	19.33	3.57	6.21	4.44	3.34	4.55	6.31	24.55	23.34	20.16	-1.425	0	-1.42062	0	0.837667	1.73597e-268	0.00438002	0.226552	2.26267	0	2.25829	0
CL4330.Contig3_All	34.8	24.51	28.32	24.81	22.35	35.64	16.5	15.4	18.28	26.84	60.2	68.75	-0.0800981	9.04262e-06	-0.799578	0	0.834717	0	-0.71948	2.61297e-243	0.914815	0	1.6343	0
CL4331.Contig15_All	3.38	8.05	8.88	12.74	6.73	5.37	14.14	8.69	10.96	14.51	23.27	25.75	0.297209	1.01932e-05	0.747955	1.00891e-30	1.65931	1.04864e-198	0.450746	1.91043e-13	1.3621	4.03292e-149	0.911351	1.88041e-78
CL4370.Contig22_All	54.84	20.5	54.99	38.52	48.25	51.61	18.17	38.12	21.49	8.65	25.16	23.09	0.0884461	1.04213e-06	-0.731765	3.75936e-253	-1.18919	0	-0.820211	0	-1.27764	0	-0.457429	3.69114e-67
CL4370.Contig8_All	59.78	59.59	139.84	165.96	92.46	58.51	232.97	193.47	181.49	99.41	166.49	193.38	0.294761	2.38711e-94	1.23758	0	0.832951	0	0.942816	0	0.538191	0	-0.404625	0
CL4382.Contig6_All	4.12	2.66	1.01	19	24.01	12.84	24.21	44.08	12.97	1.19	3.56	4.4	2.8455	0	3.39606	0	0.238354	1.73645e-05	0.550564	4.30636e-155	-2.60714	0	-3.15771	0
CL4418.Contig10_All	11.21	20.25	14.99	28.65	51.58	27.76	26.68	27.62	22.83	6.91	14.16	16.8	1.21833	0	0.739637	1.00506e-145	-0.287737	2.55789e-17	-0.478693	1.52578e-93	-1.50607	0	-1.02737	1.74881e-254
CL4419.Contig2_All	28.23	37.64	20.96	35.4	39.31	32.2	15.97	25.65	30.01	12.08	20.84	16.87	0.302823	2.90727e-39	-0.268031	8.02442e-26	-0.796301	8.10661e-180	-0.570854	1.98524e-122	-1.09912	0	-0.52827	6.66865e-73
CL4419.Contig7_All	121.72	113.99	80.16	86.36	78.23	82.76	21.6	54.79	46.77	34.72	73.37	60.43	-0.349602	7.7668e-123	-1.34505	0	-0.899254	0	-0.99545	0	-0.549652	1.87537e-222	0.445798	4.68968e-104
CL4425.Contig3_All	13.99	12.17	12.31	20.53	19.13	17.51	15.7	16.56	14.72	5	11.25	9.82	0.57491	2.47322e-60	0.297899	4.57275e-16	-0.554007	7.01634e-39	-0.277011	7.95537e-17	-1.12892	1.77172e-189	-0.851907	2.32319e-98
CL4425.Contig4_All	7.52	10.23	8.56	18.88	14.62	11.7	18.16	13.65	12.77	4.15	8.79	9.57	0.783907	1.02585e-103	0.765987	3.37e-98	-0.218822	1.56007e-07	-0.0179199	0.150022	-1.00273	1.33479e-157	-0.984809	2.74619e-150
CL443.Contig24_All	33.88	26.64	42.93	21.25	10.62	21.31	8.91	20.97	19.18	15.26	31.3	32.15	-0.956366	2.99592e-259	-1.06384	0	-0.386991	1.64402e-53	-0.107472	0.000541115	0.569375	2.34505e-82	0.676848	1.36134e-110
CL4457.Contig3_All	11.56	7.46	5.93	12.99	15.38	11.97	19.47	14.72	20.71	6.34	16.44	12.88	0.695833	1.83048e-56	1.14523	2.54275e-174	0.522175	4.49483e-31	0.449393	1.52184e-35	-0.173658	3.4198e-06	-0.623051	2.58379e-63
CL4466.Contig17_All	10.13	6.16	14.93	17.28	7.91	9.75	23.01	20.08	19.23	12.05	23.99	27.75	0.165968	2.70666e-06	1.00315	4.26059e-220	1.03689	6.13125e-240	0.837178	1.71235e-162	0.870922	5.78947e-180	0.0337441	0.0551071
CL4470.Contig11_All	6.42	15.94	7.76	21.9	13.3	8.03	35.31	22.54	18.59	12.11	36.24	33.38	0.529654	1.78129e-15	1.36503	2.4851e-122	1.4605	8.83205e-146	0.835373	6.51681e-56	0.930844	2.18495e-72	0.0954714	0.0103225
CL4487.Contig5_All	12.52	10.07	13.22	30.45	23.77	28.14	21.94	30.96	33.18	2.17	4.63	4.74	1.20368	0	1.27185	0	-1.62969	0	0.0681745	0.000102865	-2.83336	0	-2.90154	0
CL4496.Contig11_All	26.48	13.22	24.62	2.91	7.49	9.24	5.24	11.93	4.23	9.81	18.94	14.8	-1.71023	0	-1.57025	1.04827e-299	-0.555086	2.94861e-55	0.139984	0.00506612	1.15515	6.96375e-130	1.01516	5.51197e-105
CL4519.Contig1_All	15.8	13.29	12.33	11.38	19.57	13.41	12.75	15.25	6.23	7.11	6.45	5.73	0.101762	0.00309908	-0.262109	1.35365e-10	-1.09528	1.21155e-117	-0.363871	2.61438e-19	-1.19705	2.24554e-145	-0.833175	9.14169e-63
CL4534.Contig10_All	41.78	21.93	41.4	8.44	6	6.69	2.05	5.31	4	9.58	19.46	20.57	-2.31058	0	-3.19511	0	-1.0744	9.58327e-277	-0.884524	1.86194e-41	1.23618	2.00248e-165	2.12071	0
CL4539.Contig1_All	41.36	33.61	61.82	31.68	20.73	19.45	31.21	36.52	33.86	37.06	60.87	82.34	-0.925863	0	-0.422793	4.98859e-135	0.403486	6.64516e-165	0.50307	2.24511e-138	1.32935	0	0.826279	0
CL4546.Contig3_All	12.93	13.41	4.68	13.07	29.08	27.7	9.43	16.31	15.37	3.66	3.54	5.74	1.17078	0	0.413643	1.93276e-59	-1.25658	7.28153e-303	-0.757132	2.75649e-291	-2.42736	0	-1.67023	0
CL455.Contig15_All	53.62	73.46	58.79	58.18	53.46	39.19	33.22	22.62	39.76	51.86	110.49	127.02	-0.296947	3.46543e-41	-0.950207	0	0.649618	4.4936e-265	-0.65326	3.51424e-138	0.946565	0	1.59982	0
CL455.Contig20_All	24.05	19.26	22.2	16.56	13.28	14.23	3.16	6.32	8.78	9.82	23.75	18.14	-0.569324	1.73611e-92	-1.83496	0	-0.33644	1.90012e-36	-1.26564	4.79954e-238	0.232884	9.30802e-16	1.49852	0
CL455.Contig21_All	23.26	20.02	25.9	22.86	14.78	12.52	18.76	13.37	14.33	33.25	43.82	29.98	-0.460413	8.06496e-71	-0.570334	1.95683e-103	0.633417	6.86646e-194	-0.109921	5.39548e-05	1.09383	0	1.20375	0
CL455.Contig22_All	51.29	51.6	64.65	47.37	29.51	24.66	19.52	30.23	28.63	46.79	104.04	71.07	-0.718496	7.29712e-304	-1.08627	0	0.41023	3.1677e-148	-0.367779	8.91105e-56	1.12873	0	1.4965	0
CL455.Contig25_All	25.35	20.27	26.48	12.01	13.41	16.39	2.49	3.88	6.36	8.83	18.93	12.45	-0.784433	1.15438e-177	-2.49424	0	-0.838394	3.64749e-200	-1.70981	0	-0.0539615	0.0159828	1.65585	0
CL4555.Contig5_All	7.38	16.44	9.87	30.89	17.46	16.59	14.66	18.52	18.18	3.94	8.95	14.58	0.953698	2.41677e-69	0.627793	6.85646e-28	-0.274876	1.50513e-05	-0.325904	1.37412e-11	-1.22857	1.22111e-104	-0.902669	4.52532e-51
CL4555.Contig6_All	6.1	9.12	5.46	22.6	12.92	13.29	11.4	13.82	14.4	2.46	5.1	9.22	1.24465	3.2375e-98	0.953744	7.90463e-53	-0.284655	7.84825e-05	-0.290905	4.05597e-09	-1.5293	8.78888e-135	-1.2384	3.69325e-80
CL4571.Contig3_All	11.45	8.91	12.12	21.23	15.42	30.75	49.09	27.17	28	11.7	18.84	19.35	1.05572	2.27153e-201	1.68795	0	0.626181	1.04138e-62	0.632235	1.44871e-129	-0.429539	1.91551e-43	-1.06177	0
CL4571.Contig7_All	8.15	7.38	9.46	22.27	11.56	17.71	23.79	15.37	16.91	5.23	15.55	14.06	1.04821	3.21248e-129	1.17336	4.89556e-168	0.488133	8.20372e-25	0.125151	0.000174584	-0.560077	1.6567e-45	-0.685228	2.71753e-69
CL4580.Contig1_All	33.69	36.25	26.88	15.34	14.27	15.34	7.31	9.45	10.33	7.69	13.6	21	-1.10327	1.02929e-229	-1.82606	0	-1.18338	2.42393e-258	-0.722788	1.93425e-53	-0.0801046	0.00997484	0.642683	7.52304e-42
CL4583.Contig7_All	16.79	15.73	10.85	11.21	11.81	11.92	8.09	8.07	8.7	3.16	9.16	7.2	-0.309379	2.49468e-25	-0.796337	7.3215e-133	-1.14727	5.60495e-245	-0.486959	9.91041e-46	-0.837887	1.41914e-118	-0.350928	4.51457e-19
CL4599.Contig6_All	11.86	13.2	10.05	13.67	19.79	14.51	4.87	12.25	10.51	4.47	10.15	6.44	0.451847	1.82874e-38	-0.333361	5.57062e-17	-0.732483	3.921e-66	-0.785209	7.30144e-100	-1.18433	1.4418e-198	-0.399122	8.17469e-19
CL4600.Contig12_All	78.77	127.92	77.08	34.1	20.24	30.44	7.3	33.84	32.09	16.08	24.96	42.84	-1.7402	0	-1.94277	0	-1.75228	0	-0.202571	9.16949e-23	-0.0120771	0.0874704	0.190494	1.89793e-20
CL4624.Contig10_All	10.96	11.39	8.6	14.03	15.6	16.51	9.82	19.15	14.49	2.87	5.87	6.96	0.578145	9.39098e-60	0.501211	4.33536e-44	-0.971749	4.13121e-98	-0.0769345	0.00632583	-1.54989	2.69688e-301	-1.47296	5.74665e-264
CL4625.Contig8_All	25.59	28.67	18.26	3.35	5.58	3.84	1.48	3.01	3	5.88	9.69	16.9	-2.5039	0	-3.26627	0	-1.15278	0	-0.762378	8.89736e-40	1.35112	5.69069e-253	2.1135	0
CL4637.Contig1_All	26.28	33.48	13.63	21.59	44.14	28.24	15.56	17.42	42.77	11.9	11.77	12.63	0.359246	3.00806e-29	0.0552283	0.0334704	-1.00652	1.04778e-136	-0.304018	9.64712e-22	-1.36576	2.53506e-283	-1.06175	3.61516e-154
CL464.Contig10_All	30.22	20.13	42.05	20.85	8.45	11.9	16.73	12.25	15.34	19.47	38.4	39.14	-1.16168	0	-1.05745	0	0.0736149	5.05184e-06	0.104222	1.64249e-05	1.23529	0	1.13107	0
CL464.Contig13_All	14.61	29	22.07	53	22.47	19.96	65.56	35.87	38.66	20.06	43.25	56.95	0.545914	3.75409e-48	1.10603	3.62636e-232	0.887999	9.86817e-141	0.560119	5.51871e-73	0.342085	4.35018e-27	-0.218035	4.02412e-14
CL4640.Contig1_All	13.7	12.08	19.31	18.04	10.61	11.67	26.42	24.05	26.09	26.77	30	47.62	-0.156862	3.15597e-05	0.773214	1.37271e-116	1.22081	0	0.930076	7.97605e-159	1.37767	0	0.447593	7.50753e-61
CL465.Contig39_All	11.7	6.69	12.71	10.54	4.06	6.45	16.19	14.57	12.19	13.99	22.71	21.34	-0.558914	1.41288e-52	0.471082	3.49578e-53	0.904535	4.76359e-224	1.03	7.10294e-204	1.46345	0	0.433453	1.20678e-61
CL4657.Contig2_All	8.46	9.8	7.73	12.34	15.21	13.45	11.49	16.69	14.51	3.24	6.5	7.08	0.659994	4.90663e-54	0.726929	1.91576e-66	-0.620462	1.0382e-31	0.0669354	0.0238266	-1.28046	1.32069e-161	-1.34739	7.01769e-182
CL4661.Contig3_All	20.03	22.38	15.94	32.67	38.59	33.69	20.22	24.85	24.25	6.97	10.69	13.25	0.851399	2.28768e-119	0.264348	4.81962e-11	-0.903051	2.6734e-74	-0.587051	1.01223e-62	-1.75445	0	-1.1674	6.10374e-134
CL4661.Contig4_All	22.87	25.93	16.44	29.37	43.28	33.73	27.88	28.12	27.68	8.08	13.72	13.86	0.709533	4.8242e-85	0.374265	2.17331e-22	-0.8585	4.55935e-73	-0.335267	6.97484e-23	-1.56803	7.35946e-306	-1.23277	2.62343e-168
CL4663.Contig5_All	32.03	37.17	26.26	22.22	24.58	21.32	14.92	16.08	14.36	6.9	16	13.27	-0.484215	2.86993e-78	-1.06451	2.47553e-303	-1.39343	0	-0.580292	2.47558e-77	-0.909216	1.90037e-169	-0.328924	1.00717e-19
CL4698.Contig5_All	36.97	16.36	36.24	11.31	10.39	21.95	5.31	7.89	7.35	12.41	18.64	12.69	-1.03463	8.38781e-248	-2.11305	0	-1.02803	1.19309e-246	-1.07841	1.46342e-129	0.0066081	0.132504	1.08502	2.33696e-132
CL472.Contig16_All	22.75	29.03	17.5	44.8	29.6	37.14	8.21	25.38	23.16	4.28	11.09	13.57	0.691313	3.10393e-118	-0.272094	1.04207e-14	-1.24807	8.37957e-197	-0.963407	1.25521e-206	-1.93939	0	-0.975979	7.60303e-110
CL4725.Contig14_All	16.02	13.31	13.24	12.03	12.15	12.58	7	13.48	12.85	4.61	9.39	6.91	-0.208469	2.67854e-07	-0.340143	1.01756e-15	-1.01824	4.01516e-101	-0.131674	0.00111765	-0.809767	1.46569e-60	-0.678093	8.04978e-41
CL4725.Contig15_All	22.51	17.14	20.32	17.2	18.86	18.53	8.42	20.59	16.5	7.54	12.39	8.42	-0.132708	3.62345e-05	-0.383715	1.31681e-27	-1.07373	3.13569e-162	-0.251007	2.38843e-12	-0.941019	9.46114e-120	-0.690013	1.4122e-59
CL4738.Contig9_All	116.24	305.23	159.32	22.91	70.82	59.43	58.07	28.35	26.17	19.43	62.6	39.29	-1.92199	0	-2.36018	0	-2.25202	0	-0.438196	1.84444e-78	-0.330038	7.77466e-48	0.108158	4.83163e-06
CL4754.Contig3_All	15.78	13.62	14.1	24.82	23.18	19.76	10.95	16.52	15.29	4.01	12.77	8.08	0.642701	1.96251e-79	-0.0131826	0.197866	-0.801061	1.97414e-75	-0.655884	7.51473e-82	-1.44376	1.06132e-300	-0.787879	2.24157e-72
CL476.Contig12_All	7.38	16.9	16.79	30.55	19.43	12.28	32.63	33.71	25.74	34.2	59.81	82.68	0.60506	1.07239e-57	1.17593	1.85868e-258	2.11517	0	0.57087	3.47723e-76	1.51011	0	0.939237	0
CL476.Contig6_All	47.77	26.83	48.34	13	14.13	20.96	2.83	10.11	12.9	15.52	14.64	5.86	-1.35207	0	-2.23845	0	-1.76776	0	-0.886378	2.22567e-116	-0.415683	3.50401e-32	0.470696	4.79787e-30
CL4778.Contig2_All	22.42	12.42	26.34	19.41	13.6	19.82	5.76	14.33	13.15	3.5	6.75	3.24	-0.208809	3.21687e-12	-0.868175	4.66311e-144	-2.17711	0	-0.659366	6.08523e-78	-1.9683	0	-1.30894	1.22583e-154
CL4778.Contig4_All	44.48	24.55	53.24	52.76	46.36	54.17	18.59	65.84	48.67	12.48	33.09	18.31	0.329817	2.21044e-46	0.139251	3.12488e-09	-0.929379	5.1148e-232	-0.190566	2.2686e-17	-1.2592	0	-1.06863	0
CL4810.Contig3_All	26.73	15.67	23.26	26.41	19.13	26.71	15.24	26.14	24.29	8.63	15	12.35	0.141415	4.43565e-07	0.0116951	0.189083	-0.860964	2.09622e-140	-0.12972	3.18938e-06	-1.00238	2.48527e-199	-0.872659	3.65923e-144
CL4810.Contig5_All	22.89	12.41	25.35	29.76	19.06	24.51	15.24	31.01	30.2	4.31	8.53	6.63	0.277811	6.12135e-22	0.345716	1.38516e-33	-1.63289	0	0.0679053	0.00458288	-1.9107	0	-1.97861	0
CL482.Contig5_All	40.17	31.27	30.18	10.82	18.63	18.8	7.7	15.8	13.34	6.69	17.61	17.28	-1.0721	8.65369e-226	-1.44887	0	-1.27858	3.71175e-300	-0.376771	1.75201e-18	-0.206479	1.78913e-07	0.170292	5.14379e-05
CL482.Contig6_All	26.71	41.76	11.52	23.87	26.13	16.36	10.85	17.89	19.37	7.9	13.16	11.88	-0.267116	2.09322e-25	-0.724088	3.62727e-149	-1.27392	0	-0.456973	3.55586e-55	-1.00681	1.1036e-218	-0.549833	9.60365e-57
CL4824.Contig6_All	9.77	11.44	7.84	10.96	14.81	14.48	8.75	15.65	10.51	3.35	5.38	7.38	0.472429	2.24277e-36	0.276586	7.33199e-13	-0.843343	4.50798e-72	-0.195843	2.52956e-08	-1.31577	2.18728e-203	-1.11993	1.57971e-137
CL4828.Contig4_All	20.78	29.73	19.51	22.94	15.56	10.46	34.07	41.06	39.27	11.77	32.08	34.74	-0.510604	3.60461e-37	0.722429	6.06353e-110	0.179069	1.92104e-07	1.23303	1.85726e-265	0.689674	3.58761e-71	-0.54336	2.99198e-67
CL4832.Contig6_All	8.12	9.55	7.01	15.54	15.66	14.62	9.99	15.26	14.08	4.77	6.41	6.3	0.896525	1.17685e-85	0.684901	3.78482e-47	-0.489766	1.69839e-17	-0.211623	1.03478e-07	-1.38629	2.57388e-172	-1.17467	6.28424e-115
CL4836.Contig18_All	5.4	5.4	10.82	10.83	4.53	5.86	10.76	10.36	11.43	15.33	28.51	24.43	-0.0226941	0.171156	0.598361	3.63639e-36	1.66547	0	0.621055	1.92456e-38	1.68817	0	1.06711	2.13559e-197
CL4848.Contig3_All	9.62	17.47	6.54	26.39	21.12	13.35	17.11	13.37	11.31	4.46	9.39	14.35	0.862763	1.20564e-52	0.332617	4.45112e-08	-0.234061	0.000208136	-0.530146	2.92198e-23	-1.09682	2.34795e-78	-0.566678	9.5345e-19
CL4848.Contig5_All	13.17	29.38	12.97	44.56	23.7	27.73	16.07	23.07	29.09	5.75	13.02	20.86	0.796082	3.62713e-77	0.315416	8.19005e-12	-0.467355	8.61159e-19	-0.480666	2.60283e-32	-1.26344	1.59619e-164	-0.782771	2.11368e-54
CL485.Contig37_All	41.29	24.86	48.21	37.29	32.19	41.51	19.63	38.79	40.74	8.8	30.11	17.06	-0.0404749	0.0204158	-0.194713	3.92853e-18	-1.02554	0	-0.154238	6.74678e-12	-0.98507	0	-0.830832	6.91913e-211
CL485.Contig41_All	8.24	6.81	8.88	18.18	10.92	8.47	14.96	19.9	16.24	5.89	9.7	11.58	0.65639	2.21014e-33	1.1088	8.5592e-107	0.194722	0.000329516	0.452406	9.9206e-24	-0.461668	5.58377e-19	-0.914074	1.52129e-78
CL4858.Contig9_All	3.29	8.21	6.44	7.06	10.22	6.95	21.02	14.16	17.42	9.84	17.72	25.29	0.441568	6.9915e-08	1.57113	7.97568e-115	1.57948	1.8448e-117	1.12956	1.00667e-69	1.13791	4.526e-72	0.00835273	0.206413
CL4863.Contig1_All	32.8	16.52	46.07	16.11	9.29	14.25	14.27	21.29	22.52	22.27	47.19	39.04	-1.26156	4.9363e-261	-0.702142	6.60716e-99	0.195617	2.6689e-12	0.559418	1.55775e-41	1.45718	0	0.897758	1.34262e-172
CL4871.Contig1_All	22.68	30.2	35.6	6.76	17.89	26.45	18.42	14.4	4.77	3.97	4.41	4.16	-0.790475	2.18352e-112	-1.22224	7.87863e-229	-2.81001	0	-0.431766	2.55965e-23	-2.01953	2.7103e-276	-1.58777	3.66506e-147
CL4871.Contig3_All	13.1	20.5	13.33	8.63	11.43	16.63	10.48	8.55	6.77	3.96	7.45	6.35	-0.351893	2.13319e-13	-0.849722	2.669e-58	-1.39032	2.04924e-128	-0.497829	5.74987e-19	-1.03842	1.19915e-64	-0.540594	4.39095e-16
CL4872.Contig1_All	14.83	23.31	15.49	24.71	24.16	19.85	19.21	22	21.6	5.94	8.95	17.58	0.36464	1.54998e-13	0.248987	5.09152e-07	-0.701573	5.35661e-32	-0.115653	0.00545459	-1.06621	5.64586e-81	-0.95056	8.72438e-62
CL4915.Contig12_All	49.52	32.93	19.62	12.03	23.07	9.83	8.49	16.53	11.88	18.34	14.77	14.7	-1.18213	0	-1.45608	0	-1.08832	0	-0.273946	4.63872e-16	0.0938129	0.00062559	0.367758	1.53417e-28
CL494.Contig2_All	7.33	12.07	3.07	24.24	62.35	32.66	16.65	58.01	48.57	0.93	1.41	2.54	2.41308	0	2.47776	0	-2.18482	5.52559e-78	0.0646745	0.0193784	-4.5979	0	-4.66258	0
CL4963.Contig1_All	14.58	15.02	15.04	27.38	23.02	21.62	15.5	19.14	20.21	3.78	9.93	15.5	0.693677	1.36155e-90	0.307862	4.35363e-17	-0.600725	1.13092e-44	-0.385816	3.20437e-32	-1.2944	1.14177e-254	-0.908587	3.03657e-110
CL4976.Contig11_All	90.45	61.11	127.26	39.07	14.24	24.9	9.42	23.69	20.75	99.79	196.56	147.8	-1.82873	0	-2.35717	0	0.679969	0	-0.528448	4.3917e-55	2.50869	0	3.03714	0
CL4976.Contig5_All	170.21	98.97	212.41	107.73	49.15	74.31	47.06	99.3	88.74	124.33	227.97	175.13	-1.05413	0	-1.02139	0	0.138267	7.10017e-35	0.0327324	0.0157091	1.19239	0	1.15966	0
CL4984.Contig10_All	16.4	13.52	24.11	16.9	6.71	7.74	10.67	13.27	12.6	20.9	40.25	43.72	-0.7794	6.85823e-70	-0.551423	1.36904e-38	0.967223	3.88791e-195	0.227977	1.3537e-06	1.74662	0	1.51865	0
CL4985.Contig6_All	7.33	11.8	4.97	13.68	25.58	19.45	9.11	11.28	12.13	3.04	5.25	6.97	1.28715	7.09997e-203	0.444042	1.23007e-19	-0.649153	3.31561e-28	-0.843104	7.60583e-102	-1.9363	0	-1.0932	2.04387e-88
CL4990.Contig2_All	7.51	8.6	5.34	20.76	10.13	10.5	17.33	16.38	15.95	1.68	5.44	4.27	0.95332	6.56108e-116	1.21924	6.73319e-206	-0.906237	2.46946e-56	0.265924	2.58686e-15	-1.85956	0	-2.12548	0
CL4993.Contig7_All	4.08	9.81	7.29	9.86	8.17	6.99	14.21	18.07	15.47	5.75	12.41	19.3	0.243579	4.77191e-06	1.18381	4.19733e-140	0.832922	4.74086e-63	0.940229	1.64421e-96	0.589343	1.66547e-35	-0.350886	3.49219e-18
CL5007.Contig3_All	10.68	7.24	7.21	17.24	17.69	14.57	11.91	10.99	15.86	3.29	7.6	7.42	0.983949	1.18281e-62	0.641263	1.03388e-24	-0.44156	1.99134e-09	-0.342686	5.28687e-11	-1.42551	2.25006e-112	-1.08282	4.24856e-58
CL501.Contig17_All	269.34	281.07	293.39	76.37	123.36	178.44	23.85	99.89	93.69	117.14	97.97	95.63	-1.15531	0	-1.93885	0	-1.43187	0	-0.783535	0	-0.276563	1.18953e-66	0.506972	2.27316e-166
CL501.Contig21_All	17.91	20.33	17.77	7.57	9.34	13.57	2.69	8.12	8.21	10.3	8.67	9.22	-0.877257	8.99759e-240	-1.5484	0	-0.986674	2.3322e-293	-0.671139	9.51293e-83	-0.109418	0.000108649	0.561722	7.85111e-57
CL501.Contig29_All	100.64	106.95	93.72	44.19	59.33	72.25	18.64	44.56	38.98	48.71	55	64.67	-0.774473	0	-1.54368	0	-0.828677	0	-0.76921	2.54008e-195	-0.0542034	0.00324723	0.715007	5.17862e-167
CL5064.Contig6_All	76.32	91.84	70.79	13.03	4.92	9.12	3.2	6.97	6.01	14.43	27.65	21.32	-3.13782	0	-3.87408	0	-1.91044	0	-0.736257	1.07754e-68	1.22738	0	1.96364	0
CL5092.Contig1_All	9.21	18.23	15.15	10.03	9.55	8.1	10.24	16.49	12.03	4.51	6.52	6.13	-0.618074	1.22734e-51	-0.124006	0.000406893	-1.30418	7.93295e-178	0.494068	3.67302e-32	-0.686101	1.74988e-41	-1.18017	2.73798e-139
CL5095.Contig12_All	60.15	118.14	85.56	55.29	66.18	34.18	20.84	54.65	33.18	38.67	47.42	53.07	-0.759159	0	-1.26638	0	-0.916886	0	-0.507218	8.64842e-150	-0.157727	1.64663e-18	0.349491	8.33259e-69
CL510.Contig3_All	12.91	19.68	5.12	13.12	35.28	23.79	4.98	13.09	13.92	1.85	1.78	3.65	0.938162	2.67657e-164	-0.224884	5.00013e-08	-2.36194	0	-1.16305	9.86142e-232	-3.3001	0	-2.13706	7.82561e-251
CL5127.Contig3_All	25.71	49.88	27.74	46.65	47.91	44.73	47.76	59.45	57.43	16.64	19.05	40.13	0.434209	1.38976e-64	0.684365	2.09461e-171	-0.434521	1.06295e-48	0.250156	4.19113e-28	-0.868729	1.41387e-219	-1.11889	0
CL5155.Contig2_All	170.68	219.95	128.35	284.74	315.51	285.2	176.17	278.52	276.26	44.81	73.09	85.01	0.77453	0	0.508606	0	-1.34333	0	-0.265924	5.05746e-140	-2.11786	0	-1.85193	0
CL5164.Contig1_All	30.18	20.41	47.68	21.45	13.19	10.96	17.82	23.9	27.9	32.16	21.54	48.12	-1.10466	0	-0.492065	8.82552e-170	0.0563457	0.000158991	0.612599	5.23398e-179	1.16101	0	0.548411	1.14292e-215
CL517.Contig19_All	7.83	10.89	7.68	27.11	11.34	11.42	6.19	9.38	6.31	19.39	5.51	14.1	0.923057	1.2191e-127	-0.259136	2.24794e-08	0.570506	1.08784e-44	-1.18219	1.38798e-189	-0.352551	1.09488e-24	0.829642	3.33188e-84
CL5183.Contig25_All	218.75	173.19	269.46	38.14	33.96	33.73	13.12	12.63	20.05	56.16	99.04	63.9	-2.64056	0	-3.84421	0	-1.58779	0	-1.20365	0	1.05276	0	2.25642	0
CL5192.Contig7_All	19.52	10.37	23.9	8.15	5.08	6.65	6.74	9.02	7.29	17.08	26.33	21.13	-1.43267	5.20334e-300	-1.21286	1.19515e-231	0.268128	7.42871e-21	0.219803	2.18048e-06	1.70079	0	1.48099	0
CL5196.Contig17_All	81.1	55.83	114.71	29.33	21.42	36.58	52.09	55.49	36.6	88.84	140.49	145.26	-1.52458	0	-0.795854	0	0.579321	0	0.72873	0	2.10391	0	1.37517	0
CL5196.Contig21_All	22.27	17.41	41.59	7.26	7.28	13.87	5.89	8.89	11.64	15.79	21.91	34.78	-1.51537	0	-1.61452	0	-0.159353	3.43059e-13	-0.0991539	0.00285279	1.35601	0	1.45517	0
CL5196.Contig26_All	6.52	6.13	9.82	4.9	3.76	3.35	14.22	7.53	6.4	13.76	26.93	29.99	-0.900754	4.62784e-68	0.328509	2.75019e-15	1.65937	0	1.22926	2.10165e-139	2.56012	0	1.33086	0
CL5196.Contig6_All	180.14	180.87	290.74	108.49	84.61	105.82	159.58	173.76	130.48	264.38	448.4	444.81	-1.12113	0	-0.479611	0	0.837066	0	0.64152	0	1.9582	0	1.31668	0
CL5204.Contig6_All	22.82	27.46	21.73	33.85	39.26	25.57	11.66	24.93	12.77	10.21	15.47	17.99	0.455633	5.49418e-162	-0.534601	9.39465e-158	-0.718183	2.08306e-268	-0.990234	0	-1.17382	0	-0.183582	2.69401e-16
CL5206.Contig4_All	7.6	6.38	9.96	20.57	12.46	10.83	12.61	16.43	18.07	4.53	7.84	9.83	0.880656	1.04326e-50	0.994087	2.11178e-66	-0.0927132	0.0476669	0.113431	0.00760072	-0.973369	2.37174e-60	-1.0868	5.65727e-77
CL521.Contig43_All	16.24	20.24	27	19.49	9.4	17.57	2.63	11.38	7.79	6.21	8.22	5.58	-0.448086	8.28712e-94	-1.53009	0	-1.66405	0	-1.08201	0	-1.21597	0	-0.13396	5.23549e-05
CL521.Contig61_All	273.91	135.66	257.82	118.08	51.27	107.52	29.08	97.88	53.83	44.37	98.86	59.61	-1.26364	0	-1.86095	0	-1.70551	0	-0.597304	8.15487e-148	-0.441862	2.19418e-87	0.155442	2.01092e-10
CL5218.Contig11_All	16.56	30.26	28.35	37.02	21.99	15.16	54.83	33.31	34.06	42.31	60.06	70.39	-0.0142361	0.167732	0.709226	1.49198e-143	1.21001	0	0.723462	2.72949e-148	1.22425	0	0.500786	7.6408e-110
CL523.Contig14_All	19.15	28.78	17.41	42.85	25.12	20.41	44.75	38.02	57.64	23.7	44.2	56.13	0.439661	4.01818e-72	1.109	0	0.931413	0	0.669344	3.71424e-240	0.491752	2.4448e-124	-0.177591	6.65785e-22
CL523.Contig6_All	25.09	15.54	13.41	13.88	18.59	20.5	3.87	13.02	13.84	6.38	10.34	10.05	-0.0273711	0.0950673	-0.802687	2.63899e-130	-1.00692	5.5123e-192	-0.775316	2.61565e-120	-0.979544	2.60662e-180	-0.204228	9.20483e-08
CL5230.Contig1_All	17.66	12.9	15.04	11.34	20.23	21.44	3.59	14.02	11.38	2.89	6.07	4.62	0.218832	6.6817e-11	-0.638874	5.59898e-59	-1.74175	1.34612e-294	-0.857706	9.60497e-113	-1.96058	0	-1.10287	1.85037e-95
CL526.Contig3_All	18.14	21.81	11.93	28.95	26.12	17.26	10.09	21.24	18	7.52	11.85	12.87	0.481738	1.45633e-135	-0.0639921	0.00112622	-0.682467	3.06317e-182	-0.54573	7.27954e-169	-1.16421	0	-0.618475	4.0475e-146
CL527.Contig1_All	32.17	12.96	34.4	10.08	6.63	11.32	11.19	16.54	15.3	18.42	28.72	15.21	-1.50259	0	-0.879552	0	-0.349439	1.36802e-81	0.623035	1.04291e-125	1.15315	0	0.530112	1.5262e-136
CL527.Contig10_All	31.22	20.7	44.21	21.6	9.84	14.51	29.87	30.39	27.74	43.37	68.29	67.65	-1.06169	0	-0.123168	1.25838e-14	0.902342	0	0.938524	0	1.96403	0	1.02551	0
CL527.Contig2_All	49.33	20.66	49.1	15.33	10.14	19.8	4.15	19.65	17.06	17.6	31.29	20.97	-1.39196	0	-1.52728	0	-0.762477	5.71615e-174	-0.135318	0.000263688	0.629487	1.49985e-74	0.764805	2.17179e-103
CL527.Contig3_All	66.66	38.47	73.78	33.89	18.06	25.12	31.73	36.91	40.47	49.95	85.89	70.69	-1.21196	0	-0.708345	0	0.210024	4.25613e-71	0.50361	5.33665e-190	1.42198	0	0.91837	0
CL528.Contig10_All	79.77	70.88	75.06	37.86	40.89	41.6	21.12	29.38	27.46	40.85	64.26	58.47	-0.905221	0	-1.52489	0	-0.459251	4.84147e-208	-0.619664	2.3894e-189	0.44597	3.75133e-144	1.06563	0
CL528.Contig3_All	26.7	32.94	22.54	20.81	20.98	16.6	14.07	13.07	10.94	18.16	29.58	17.27	-0.490363	1.05379e-83	-1.10268	0	-0.334335	2.47267e-42	-0.612316	1.762e-88	0.156028	1.44768e-09	0.768344	5.96548e-147
CL528.Contig4_All	16.31	34.31	13.45	22.06	34.93	22.48	20.18	14.63	14.58	5.56	5.03	10.34	0.312025	1.50816e-35	-0.370112	3.69905e-39	-1.60675	0	-0.682137	7.2403e-143	-1.91878	0	-1.23664	5.58514e-242
CL5288.Contig1_All	45.75	20.54	55.55	23.5	12.17	17.34	18.74	27.59	21.74	21.38	45.16	26.66	-1.1971	0	-0.830951	0	-0.383216	3.82529e-91	0.366149	2.23616e-47	0.813884	4.5623e-268	0.447735	7.92507e-93
CL5290.Contig15_All	13.89	14.37	12.31	13.61	26.59	21.63	7.59	12.02	15.99	6.05	10.82	9.4	0.607478	1.50189e-199	-0.183243	1.8265e-15	-0.624259	7.16313e-139	-0.790721	0	-1.23174	0	-0.441016	9.63727e-66
CL533.Contig8_All	10.44	12	6.11	11.61	33.06	24.43	8.38	12.58	9.91	2.71	4.27	5.61	1.27622	1.26825e-289	0.124123	0.00152875	-1.1732	1.80326e-106	-1.15209	2.00934e-245	-2.44941	0	-1.29732	7.98731e-135
CL5339.Contig9_All	13.71	10.62	14.87	21.67	18.78	19.4	6.92	23.73	22.11	3.99	5.75	5.23	0.613855	9.79153e-62	0.442906	3.8585e-31	-1.38125	9.35849e-155	-0.170949	3.32222e-07	-1.99511	0	-1.82416	0
CL5351.Contig1_All	52.44	37.17	34.93	59.49	102.69	95.04	17.47	44.05	45.89	32.62	62.17	57.26	1.05071	0	-0.194328	8.2442e-10	0.30213	4.53495e-25	-1.24503	0	-0.748576	1.26781e-206	0.496458	5.03814e-60
CL5373.Contig5_All	6.73	11.19	6.97	14.29	12.75	7.82	21.92	13.68	13.95	7.07	14.23	19.04	0.490375	9.31437e-24	1.00143	1.4378e-110	0.706899	2.82319e-51	0.51106	2.55469e-35	0.216524	1.32455e-07	-0.294536	5.71396e-14
CL5388.Contig1_All	28.21	33.72	52.58	5.99	8.07	11.4	2.46	5.28	4.81	19.86	20.82	17.5	-2.16656	0	-3.17545	0	-0.969185	3.15309e-227	-1.0089	7.79867e-55	1.19737	2.07834e-164	2.20627	0
CL5390.Contig5_All	22.27	19.22	39.34	24.49	15.19	16.43	38.78	26.42	26.81	20.88	54.91	51.74	-0.522654	1.05224e-67	0.194122	1.88887e-13	0.665653	3.22812e-164	0.716776	1.0245e-133	1.18831	0	0.471532	1.3297e-88
CL5393.Contig3_All	9.86	10.68	9.87	22.96	16.41	15.9	10.45	20.25	20.33	2.46	3.53	4.87	0.864666	5.61904e-215	0.755294	7.25723e-158	-1.48047	1.04719e-280	-0.109372	3.29555e-06	-2.34513	0	-2.23576	0
CL5400.Contig13_All	13.87	20.82	11.21	18.8	22.46	23.28	8.14	18.98	15.25	7.12	16.24	8.17	0.493355	1.27062e-63	-0.103755	0.000591702	-0.538276	1.14867e-53	-0.59711	1.07844e-88	-1.03163	9.27634e-228	-0.43452	2.7934e-34
CL541.Contig10_All	49.34	72.9	70.01	40.34	20.17	26.94	75.21	40.5	51.12	50.07	113.17	105.3	-1.13151	0	-0.195519	1.91681e-19	0.492538	5.28338e-145	0.93599	3.67815e-274	1.62405	0	0.688057	6.4846e-262
CL541.Contig18_All	42.29	53.58	65.76	65.96	29.83	32.54	143.22	58.59	72.86	74.32	102.62	126.87	-0.328285	2.37989e-60	0.768586	0	0.918078	0	1.09687	0	1.24636	0	0.149492	2.47335e-26
CL541.Contig20_All	16.7	18.32	18.41	7.34	5.64	7.32	10.99	11.68	9.76	8.29	20.01	17.8	-1.3927	6.40941e-268	-0.711179	2.43319e-89	-0.206527	8.70272e-11	0.681518	2.63348e-51	1.18617	9.35277e-183	0.504652	4.29834e-43
CL5410.Contig10_All	20.55	16.83	14.78	15.72	17.61	29.98	5.22	6.65	8.07	5.18	4.5	6.68	0.282778	6.33723e-11	-1.37235	5.90666e-122	-1.65968	2.15323e-162	-1.65513	2.81722e-194	-1.94246	1.23878e-244	-0.287335	8.44447e-05
CL5410.Contig11_All	14.15	21.93	13.75	21.4	17.5	32	9.33	21.2	21.45	8.26	5.99	12.07	0.512257	3.60276e-32	0.0787476	0.0305515	-0.90623	2.63789e-60	-0.43351	4.80521e-24	-1.41849	4.71154e-173	-0.984978	1.81573e-72
CL5410.Contig13_All	11	14.24	8.87	13.57	18.1	24.52	2.9	6.49	7.11	6.84	3.12	8.61	0.723648	1.27782e-45	-1.02996	5.55732e-50	-0.862848	4.63152e-38	-1.75361	5.65747e-181	-1.5865	3.63045e-159	0.167116	0.0113716
CL542.Contig2_All	133.1	151.21	163.8	96.54	78.38	90.11	31.34	71.21	68.82	83.47	104.21	126.63	-0.755135	0	-1.37607	0	-0.505504	0	-0.62093	0	0.249632	1.07726e-88	0.870562	0
CL5422.Contig1_All	87.69	163.93	50.28	28.99	50.64	36.68	14.03	38.44	50.55	70.74	65.13	81.65	-1.37138	0	-1.53255	0	-0.458624	1.02237e-92	-0.161177	1.46089e-06	0.912752	7.79922e-226	1.07393	1.11906e-293
CL5425.Contig3_All	16.83	21.86	16.68	15.11	11.51	10.62	15.95	17.71	13.63	19.04	28.23	28.06	-0.568966	1.99389e-63	-0.21812	5.02832e-12	0.450559	3.07728e-57	0.350846	1.90882e-23	1.01952	8.34244e-235	0.668679	2.09703e-114
CL5426.Contig27_All	38.75	12.37	31.29	2.49	1.79	3.02	1.92	2.88	4.19	12.6	8.39	10.78	-3.49291	0	-3.18575	0	-1.3678	0	0.307166	0.000173244	2.12511	5.36032e-249	1.81795	4.95095e-202
CL5426.Contig9_All	45.75	15.07	38.63	5.55	2.08	3.06	3	4.23	4.94	19.29	18.56	28.13	-3.21345	0	-3.0212	0	-0.583436	3.52454e-106	0.192246	0.00259958	2.63001	0	2.43777	0
CL5429.Contig29_All	18.72	20.56	15.89	9.72	6.89	6.86	4.34	7.13	9.78	6.6	15.86	17.53	-1.23043	0	-1.37001	0	-0.45964	4.98601e-71	-0.139582	8.81532e-05	0.770786	4.53087e-129	0.910369	6.65585e-170
CL5439.Contig9_All	9.92	13.44	6.72	12.23	17.88	16.91	8.77	15.29	16.42	4.06	4.58	6.3	0.646443	8.5509e-65	0.439358	7.92311e-29	-1.00061	1.17349e-87	-0.207085	2.57321e-09	-1.64705	5.94894e-293	-1.43997	6.11716e-208
CL5447.Contig3_All	16.41	15.1	26.64	36.11	16.4	22	26.08	57.8	31.08	22.51	21.61	23.66	0.363349	6.14759e-23	1.00175	2.65914e-201	0.231499	3.87132e-10	0.638397	1.8541e-93	-0.13185	4.35727e-05	-0.770247	3.2264e-130
CL5453.Contig3_All	18	11.68	22.13	4.58	4.62	9.05	4.18	7.7	5.33	6.06	25.78	17.24	-1.50302	3.18741e-185	-1.57432	1.65189e-197	-0.0685327	0.0244517	-0.071307	0.0835331	1.43448	3.62574e-166	1.50579	1.66557e-177
CL5456.Contig3_All	41.8	18.66	49.35	14.68	13.79	24.18	8.78	31.22	18.22	18.33	24.27	22.23	-1.05752	3.38653e-257	-0.897493	1.42728e-195	-0.751695	4.36245e-146	0.16003	4.63361e-06	0.305827	9.97646e-19	0.145797	8.41734e-06
CL5456.Contig5_All	17.96	15.25	27.89	15.18	8.65	10.18	27.52	21.45	20.43	18.19	37.66	36.21	-0.839101	5.58578e-66	0.198699	6.11939e-07	0.60504	2.93744e-57	1.0378	1.99539e-106	1.44414	5.76364e-238	0.406341	1.60538e-28
CL5456.Contig6_All	77.39	55.21	99.58	58.53	39.82	45.12	104.67	74.41	68.36	85.86	142.41	121.68	-0.689711	2.8663e-227	0.102922	2.13957e-08	0.601696	7.16231e-272	0.792632	0	1.29141	0	0.498774	2.67926e-193
CL5456.Contig8_All	30.16	23.93	45.13	31.96	15.13	16.56	60.51	33.68	41.89	47.57	91.84	75.75	-0.635259	7.44161e-99	0.463301	4.20494e-77	1.12497	0	1.09856	0	1.76023	0	0.661668	6.97503e-230
CL55.Contig40_All	10.91	10.49	6.29	11.68	2.96	7.28	19.34	19.2	30.7	15.4	27.27	49.31	-0.331839	1.93942e-15	1.32809	0	1.73989	0	1.65993	0	2.07173	0	0.411799	5.95938e-70
CL5505.Contig2_All	19.05	26.25	19.76	46.37	45.02	40.49	30.96	40.02	34.58	8.05	13.02	13.41	1.02353	1.26018e-247	0.712206	3.02753e-108	-0.905488	5.66126e-101	-0.311327	9.2238e-31	-1.92902	0	-1.61769	0
CL5505.Contig3_All	22	12.78	21.57	24.75	56.83	46.22	8.12	25.61	20.59	3.36	7.57	10.56	1.18515	1.18521e-259	-0.0339447	0.12357	-1.37559	1.25649e-145	-1.21909	3.9312e-270	-2.56074	0	-1.34165	1.95266e-136
CL5505.Contig4_All	20.01	29.35	16.08	69.84	31.8	30.1	47.87	63.14	57.07	11.12	22.47	9.56	1.01519	1.51606e-252	1.37438	0	-0.594011	2.66512e-51	0.359191	4.84805e-52	-1.6092	0	-1.96839	0
CL5508.Contig10_All	2.84	7.83	5.83	21.3	17.33	6.49	19.44	18.68	18.95	3.48	5.88	7.78	1.45724	6.07562e-128	1.80379	3.95303e-219	0.0673373	0.0946024	0.346553	4.26933e-15	-1.3899	2.89812e-120	-1.73646	5.55072e-209
CL5521.Contig13_All	9.22	7.37	10.67	6.58	5.56	5.69	2.75	3.67	6	14.31	32.49	23.6	-0.610419	2.68955e-42	-1.12788	5.9786e-117	1.37293	0	-0.517466	2.07797e-21	1.98335	0	2.50082	0
CL5523.Contig18_All	27.66	14.33	20.34	29.11	23.84	23.54	14.66	15.61	18.05	5.69	13.7	7.81	0.298542	5.89977e-29	-0.359721	4.54954e-33	-1.1915	3.15616e-261	-0.658263	1.35733e-117	-1.49004	0	-0.831775	6.47063e-113
CL5523.Contig6_All	35.13	42.6	23.09	49.12	54.99	52.11	20.34	27.91	30.85	6.57	16.58	10.56	0.633758	2.19502e-250	-0.341866	3.44239e-53	-1.57639	0	-0.975624	0	-2.21014	0	-1.23452	0
CL553.Contig12_All	66.54	51.52	81.71	57.92	31.56	30.33	54.66	45.85	50.49	59.25	96.01	90.98	-0.733003	9.90005e-302	-0.395761	1.10729e-99	0.308991	9.67547e-79	0.337243	8.32654e-57	1.04199	0	0.704752	0
CL5531.Contig1_All	17.29	11.08	21.18	9.35	6.3	9.12	12.95	15.09	13.73	14.53	28.36	20.83	-0.996978	6.61571e-140	-0.237321	5.61311e-12	0.368668	2.09059e-32	0.759657	3.08837e-75	1.36565	2.85026e-298	0.605989	2.16017e-77
CL5531.Contig16_All	19.96	15.68	31.68	23.2	10.37	12.28	28.72	23.84	23.55	26.85	46.16	50.32	-0.549536	3.50152e-64	0.184601	7.08938e-11	0.880812	1.25622e-266	0.734136	7.04808e-120	1.43035	0	0.696211	1.99119e-177
CL5532.Contig9_All	11.33	8.19	13.41	17.89	14.52	16.88	20.53	21.84	28	6.42	12	9.65	0.584247	6.09511e-78	1.10167	0	-0.225687	1.52274e-10	0.517418	8.04486e-89	-0.809934	3.04603e-138	-1.32735	0
CL5534.Contig3_All	6.44	8.26	7.23	12.18	17.15	14.57	13.49	9.22	17.62	5.4	4.25	10.16	1.00567	8.48248e-60	0.892097	1.5031e-45	-0.13084	0.0222757	-0.113577	0.0106532	-1.13651	2.36326e-73	-1.02294	4.53131e-57
CL5542.Contig3_All	145.19	84.09	197.11	118.27	58.18	84.61	113.63	128.84	137.09	106.86	210.03	208.59	-0.704029	0	-0.160193	1.59963e-50	0.307352	1.04387e-214	0.543836	0	1.01138	0	0.467545	0
CL5550.Contig7_All	28.88	48.12	24.81	93.19	59.7	70.05	42.99	56.81	47.83	9.41	22.2	36.01	1.13541	0	0.550927	1.60909e-88	-0.576264	1.16469e-66	-0.584482	3.24723e-146	-1.71167	0	-1.12719	8.73226e-301
CL5550.Contig9_All	8.75	12.06	7.32	23.67	14.71	22.15	4.7	13.51	9.55	1.64	4.19	6.72	1.10929	3.76552e-146	-0.00300223	0.250109	-1.15226	2.09956e-73	-1.1123	4.90665e-146	-2.26155	0	-1.14925	1.26094e-72
CL5563.Contig1_All	11.3	9.37	13.11	14.08	12.81	11.57	8.01	13.12	12.48	4.61	5.81	7.62	0.190295	2.13978e-07	0.00332151	0.244934	-0.897276	2.3074e-87	-0.186973	3.58691e-07	-1.08757	2.76499e-136	-0.900597	1.05208e-87
CL5570.Contig1_All	23.08	22.84	28.47	12.21	7.26	7.32	2.54	3.83	3.71	11.97	30.11	20.72	-1.4696	0	-2.8732	0	-0.238433	2.11886e-17	-1.4036	1.09975e-129	1.23117	4.86033e-250	2.63477	0
CL5576.Contig5_All	8.47	10.33	5.02	15.61	25.42	21.87	11.76	14.1	16.6	2.03	2.27	2.96	1.40351	6.38084e-181	0.846607	2.38145e-55	-1.7028	3.30692e-92	-0.556907	2.04129e-39	-3.10631	0	-2.5494	2.02369e-272
CL5583.Contig2_All	121.61	141.05	152.08	139.47	105.88	101.59	232.79	177.18	180.78	176.49	262.67	326.58	-0.253278	2.26755e-70	0.520297	0	0.894909	0	0.773575	0	1.14819	0	0.374611	6.06865e-270
CL5586.Contig12_All	7.2	9.67	8.07	36.94	30.76	25.58	36.14	24.92	30.54	5.85	16.13	12.91	1.90717	0	1.88578	0	0.492982	5.54872e-23	-0.0213962	0.121986	-1.41419	0	-1.3928	0
CL5611.Contig2_All	11.88	11.15	9.58	14.53	17.91	14.63	9.34	8.75	14.15	4.94	9.92	7.53	0.533163	1.50615e-26	-0.00437879	0.245997	-0.531966	4.92669e-19	-0.537542	8.92439e-27	-1.06513	1.21514e-84	-0.527587	1.27663e-18
CL5612.Contig1_All	17.56	22.85	14.69	34.76	34.69	26.84	14.07	23.17	19.88	7.84	15.2	14.41	0.809349	1.69708e-122	0.0666212	0.0294021	-0.546631	1.59201e-36	-0.742727	2.90666e-105	-1.35598	4.43363e-284	-0.613253	3.00988e-46
CL5614.Contig1_All	107.23	90.91	100.41	80.65	65.49	64.06	63.8	79.83	173.26	172.76	198.48	178.06	-0.501659	1.54428e-156	0.0970416	6.44546e-09	0.889249	0	0.5987	1.14336e-228	1.39091	0	0.792208	0
CL5624.Contig3_All	8.32	14.69	4.06	13.44	19	13.19	7.41	17.52	8.04	3.36	5.6	9.71	0.754623	6.44781e-94	0.298535	4.20475e-14	-0.528348	4.88552e-31	-0.456088	6.22418e-39	-1.28297	3.87812e-225	-0.826883	1.33249e-80
CL5647.Contig13_All	21.75	33.53	11.05	19.32	35.22	32.32	9.95	19.64	14.42	5.99	6.14	10.6	0.390298	2.90254e-49	-0.579713	2.31757e-76	-1.53722	0	-0.97001	1.60736e-240	-1.92751	0	-0.957503	7.98073e-122
CL5648.Contig3_All	17.62	22.45	12.96	24.64	31.59	23.94	13.44	17.91	36.4	8.95	15.17	13.12	0.601173	2.29743e-45	0.367784	8.04786e-17	-0.496697	2.29392e-22	-0.233389	3.03502e-09	-1.09787	4.05473e-125	-0.864481	7.00379e-72
CL5677.Contig3_All	18.1	20.06	19.25	28.3	57.28	17.8	10.66	18.75	18.5	8.19	17.36	14.25	0.851177	3.13098e-176	-0.248348	6.15868e-12	-0.520909	9.81707e-43	-1.09953	1.19358e-267	-1.37209	0	-0.27256	4.2207e-12
CL5677.Contig4_All	12.72	9.91	9.23	14.27	29.86	15.78	5.91	7.73	8.22	3.68	9.92	7.65	0.913217	1.45614e-142	-0.533107	8.67552e-31	-0.577116	1.20976e-35	-1.44632	4.58922e-294	-1.49033	0	-0.0440094	0.1005
CL5692.Contig1_All	27.72	17.9	29.81	15.08	10.54	10.95	7.03	7.84	13.23	19.24	36.67	32.37	-1.04152	2.01152e-301	-1.4183	0	0.231981	3.7414e-25	-0.37678	1.14332e-25	1.2735	0	1.65028	0
CL5698.Contig6_All	14.89	20.93	9.89	33.67	48.13	56.7	16.66	23.82	35.97	6.27	7.99	8.89	1.60124	0	0.751723	3.30242e-112	-0.973399	1.33579e-104	-0.849519	3.99893e-247	-2.57464	0	-1.72512	0
CL5700.Contig2_All	10.69	7.01	11.02	10.37	3.22	6.97	12.83	12.19	18.48	14.26	27.27	20.11	-0.477228	1.63294e-24	0.605767	8.27956e-55	1.10748	1.24004e-214	1.083	3.95281e-145	1.5847	0	0.501709	1.78217e-55
CL5700.Contig59_All	36.81	15.8	39.08	23.65	10.56	11.13	15.2	16.73	26.78	23.94	57.82	27.99	-1.01166	0	-0.638506	8.85561e-220	0.261298	3.45886e-52	0.373156	4.34576e-54	1.27296	0	0.899804	0
CL5700.Contig67_All	28.59	21.76	59.19	40.58	26.11	34.33	46.31	50.04	46.83	14.48	23.57	14.15	-0.112599	1.4503e-05	0.398258	7.70781e-58	-1.06185	2.79769e-244	0.510857	2.81172e-90	-0.949249	2.27638e-188	-1.46011	0
CL5704.Contig25_All	23.92	18.63	17.13	10.1	16.88	15.99	5.09	10.96	11.11	6.5	10.28	11.63	-0.472114	1.12935e-58	-1.1251	1.02002e-258	-1.06442	9.18819e-239	-0.652989	4.56981e-75	-0.592304	2.02378e-64	0.0606842	0.0347846
CL5705.Contig1_All	53.6	78.06	47.71	23.84	27.07	31.82	9.98	12.95	21.91	19.48	38.16	55.77	-1.11283	0	-1.98701	0	-0.647129	6.83353e-134	-0.874184	1.2633e-103	0.465702	1.15049e-48	1.33989	4.30161e-285
CL5707.Contig6_All	31.61	19.49	37.18	61.13	33.81	30.07	82.76	64.36	78.76	34.48	29.43	72.77	0.50614	2.1037e-130	1.36098	0	0.63919	6.20414e-218	0.854844	0	0.13305	2.56259e-13	-0.721794	0
CL5715.Contig4_All	7.74	8.59	8.61	17.73	19.1	18.2	15.52	18.71	17.14	3.24	3.11	3.29	1.14595	1.06684e-122	1.05635	4.59837e-101	-1.36079	8.47854e-74	-0.0896047	0.00922575	-2.50674	0	-2.41713	0
CL5727.Contig2_All	11.38	6.68	14.25	9.49	12.81	6.77	23.82	20.19	27.39	6.91	18.21	19.85	-0.14871	0.000411596	1.15248	2.2262e-222	0.486158	2.4294e-33	1.30119	1.92288e-268	0.634867	4.56165e-53	-0.666319	1.75231e-89
CL5733.Contig1_All	27.13	27.06	17.3	17.49	28.01	33.24	6.23	20.83	16.29	7.41	14.23	10.09	0.140492	6.08244e-09	-0.708377	4.88687e-136	-1.16754	0	-0.848869	7.12816e-204	-1.30803	0	-0.459163	1.13689e-39
CL5740.Contig10_All	19.39	42.59	17.9	61.21	51.13	35.37	91.89	76.23	66.33	23.91	31.89	69.82	0.892401	8.15903e-170	1.56859	0	0.670051	4.73735e-90	0.676191	4.33653e-167	-0.22235	2.10733e-15	-0.898541	5.59062e-274
CL5740.Contig6_All	5.91	13.78	6.45	20.02	17.09	13.43	29.86	27.21	24.89	7.75	11.77	20.61	0.954173	3.36939e-131	1.65642	0	0.627218	4.1988e-52	0.702252	1.35731e-125	-0.326955	3.55879e-21	-1.02921	5.42943e-241
CL5740.Contig9_All	20.95	50.3	23.31	55.95	54.01	37.75	82.85	68.32	64.99	26.01	32.76	64.64	0.647182	1.65585e-150	1.20245	0	0.39561	4.15729e-53	0.555265	4.96341e-167	-0.251572	4.17861e-28	-0.806837	0
CL5762.Contig3_All	16.19	9.87	15.3	8.36	6.06	3.83	12.13	6.31	8.07	30.84	45.12	58.73	-1.17477	8.51682e-106	-0.632726	4.164e-38	1.71437	0	0.542039	1.59731e-19	2.88913	0	2.34709	0
CL5769.Contig7_All	8.62	6.77	14.64	8.49	8.65	4.3	17.61	10.72	9.64	15.89	11.61	16.45	-0.483412	2.70683e-24	0.344616	5.44117e-17	0.556497	8.04569e-45	0.828028	1.24393e-75	1.03991	7.17548e-129	0.211881	7.41853e-09
CL5775.Contig12_All	12.35	13.27	17.02	27.98	16.99	14.78	43.38	33.89	35.53	26.6	49.92	48.29	0.491524	8.2413e-44	1.41178	0	1.55754	0	0.920255	7.07176e-241	1.06601	0	0.145759	1.29689e-10
CL5787.Contig1_All	7.59	8.58	9.06	14.83	11.17	11.05	8.23	22.33	14.3	4.05	4.76	4.32	0.558226	3.5853e-31	0.845897	5.33114e-76	-0.934935	3.08299e-51	0.287672	3.15537e-12	-1.49316	7.77257e-155	-1.78083	5.79611e-241
CL5790.Contig3_All	16.91	10.5	11.12	11.56	13.91	14.25	5.84	9.33	10.4	4.33	7.71	6.73	0.0449271	0.0227367	-0.585079	1.71486e-97	-1.03385	4.95787e-260	-0.630006	2.90052e-114	-1.07877	1.5419e-287	-0.448767	2.14587e-41
CL581.Contig7_All	30.17	20.9	27.02	14.26	22.61	5.48	9.06	12.51	15.92	20.74	37.3	34.54	-0.880941	1.66586e-210	-1.05089	5.64773e-281	0.251317	3.31014e-27	-0.169951	3.52675e-07	1.13226	0	1.30221	0
CL5814.Contig2_All	5.44	9.42	5.6	21.46	17.47	16.3	12.52	16.8	14.43	2.05	4.34	5.05	1.43596	4.70421e-206	1.10855	4.46474e-110	-0.828641	4.10946e-33	-0.327412	2.42777e-17	-2.2646	0	-1.93719	2.77395e-251
CL5828.Contig3_All	21.49	17.57	22.16	25.74	27.39	26.21	13.07	27.18	29.75	9.25	11.45	9.51	0.376442	1.52003e-45	0.203842	7.15354e-14	-1.0133	8.48558e-199	-0.1726	1.19429e-11	-1.38974	0	-1.21714	1.1979e-305
CL583.Contig1_All	34.38	89.75	41.47	95.91	80.44	63.56	122.34	114.51	118.67	40.16	48.87	103.93	0.538411	1.29e-183	1.11178	0	0.231724	2.29428e-32	0.573364	1.38074e-303	-0.306687	1.96508e-66	-0.880052	0
CL583.Contig5_All	13.54	18.75	10.62	14.48	19.59	21.64	5.15	19.83	21.39	5.44	4.37	7.83	0.378961	6.38652e-25	0.125799	0.000458991	-1.27236	1.54179e-149	-0.253162	1.53844e-12	-1.65132	8.93309e-286	-1.39815	2.26085e-187
CL5840.Contig5_All	19.24	11.12	12.13	19.32	18.17	31.16	11.75	29.45	15.23	7.48	6.27	8.07	0.695522	1.59369e-73	0.4275	1.90468e-26	-0.951052	4.0951e-78	-0.268022	3.99376e-14	-1.64657	5.75754e-293	-1.37855	6.89003e-187
CL5847.Contig2_All	6.61	10.39	3.37	15.99	27.69	20.08	6.45	14.89	18.52	1.51	2.24	2.05	1.64764	0	0.97868	7.08483e-124	-1.80804	6.51933e-162	-0.668963	1.53727e-102	-3.45568	0	-2.78672	0
CL5848.Contig22_All	7.95	6.77	13.79	12.55	5.38	5.18	20.77	9.04	13.75	13.18	20.71	25.75	-0.297408	1.71768e-09	0.616796	7.27746e-47	1.07377	2.66186e-163	0.914204	6.97236e-91	1.37117	1.44578e-239	0.45697	6.44959e-38
CL5854.Contig5_All	395.35	312.69	556.44	173.58	81.2	97.95	134.81	159.23	173.2	267.98	409	418.82	-1.8362	0	-1.42288	0	-0.195576	2.87521e-113	0.413315	5.17688e-172	1.64062	0	1.22731	0
CL5864.Contig2_All	26.97	20.99	29.46	26.56	12.94	14.45	18.36	23.83	28.83	24.86	74.33	60.09	-0.516957	4.8417e-79	-0.116018	3.02039e-06	1.04653	0	0.400939	3.35475e-46	1.56348	0	1.16254	0
CL5868.Contig1_All	8.78	18.74	12.21	25.38	16.21	15.25	24.36	13.51	17.16	5.16	7.92	10.78	0.523025	2.07287e-24	0.485056	6.24342e-21	-0.718947	8.20493e-30	-0.0379687	0.114778	-1.24197	6.55865e-102	-1.204	5.38181e-94
CL5868.Contig3_All	26.39	47.12	25.43	74.25	43.11	51.41	48.11	38.11	49.83	12.93	27.81	31.85	0.778044	1.80824e-98	0.482062	3.2963e-35	-0.424288	5.45826e-21	-0.295981	2.76737e-18	-1.20233	1.42973e-202	-0.90635	3.26067e-104
CL5876.Contig4_All	15.27	10.95	10.35	13.83	19.69	17.56	7.5	13.48	14.93	4.32	8.01	7.66	0.484426	1.12719e-42	-0.0151233	0.190024	-0.864116	8.11821e-84	-0.499549	8.50157e-45	-1.34854	3.47901e-238	-0.848993	3.3717e-80
CL5883.Contig3_All	195.14	275.82	100.99	188.52	115.3	126.57	55.74	77.07	119.37	160.65	146.12	182.5	-0.406224	0	-1.17254	0	-0.217903	2.10076e-96	-0.766318	0	0.188321	1.70766e-63	0.954639	0
CL5916.Contig3_All	38.68	11.74	38.56	16.35	9.92	19.38	9.47	13.75	13.51	11.63	30.51	27.63	-0.960847	0	-1.27085	0	-0.348345	9.78906e-120	-0.310001	7.3808e-50	0.612502	2.52878e-263	0.922502	0
CL5926.Contig5_All	24.36	25.11	17.09	24.78	37.14	29.66	15.4	25	22.05	11.81	17.34	15.13	0.462126	3.25207e-76	-0.0813164	0.00125114	-0.582152	1.3725e-84	-0.543442	2.51436e-101	-1.04428	0	-0.500836	4.07257e-61
CL593.Contig1_All	202.08	90.04	277.9	191.11	100.98	174.39	179.57	238.52	172.93	60.42	96.67	83.88	-0.286516	0	0.0593213	6.25473e-17	-1.23891	0	0.345837	0	-0.952392	0	-1.29823	0
CL593.Contig19_All	72.29	31.12	75.5	57.16	36.83	54.12	50.69	57.8	46.93	21.57	40.51	26.82	-0.270047	4.65068e-102	-0.197294	1.64179e-56	-1.00682	0	0.0727538	1.38626e-08	-0.736769	0	-0.809523	0
CL593.Contig32_All	164.34	97.9	270.44	335.6	130.26	188.3	356.66	261.12	292.46	109.82	166	161.84	0.299965	0	0.775309	0	-0.280295	3.87038e-304	0.475344	0	-0.58026	0	-1.0556	0
CL593.Contig33_All	91.52	50.75	168.98	75.45	38.81	67.29	22.07	79.29	47.05	30.55	38.61	36.43	-0.775371	0	-1.05645	0	-1.55659	0	-0.281083	8.26594e-104	-0.781219	0	-0.500136	4.91275e-250
CL5931.Contig1_All	44.13	84.62	49.46	103.35	85.68	68.06	153.12	123.33	133.05	58.07	65.23	113.36	0.534509	3.25313e-113	1.21596	0	0.425454	3.03156e-70	0.681448	1.19282e-276	-0.109055	1.61552e-07	-0.790503	0
CL5935.Contig7_All	30.57	22.9	25.87	39.83	41.36	38.17	17.53	26.88	24.19	9.79	16.14	19.41	0.592362	2.99048e-116	-0.197718	1.71329e-11	-0.798206	5.90304e-131	-0.790081	5.03357e-191	-1.39057	0	-0.600488	8.95645e-70
CL5935.Contig8_All	18.75	27.67	15.21	24.95	31.99	23.85	8.74	15.75	18.41	9.65	13.83	13.61	0.392842	3.9431e-41	-0.511957	1.89953e-50	-0.725317	2.32296e-93	-0.904799	1.31167e-175	-1.11816	2.79719e-251	-0.213359	1.78747e-08
CL5940.Contig6_All	13.25	15.08	12.45	19.29	26.1	26.2	14.09	19.16	20.19	5.86	11.51	10.04	0.813721	2.86201e-159	0.399336	1.46366e-34	-0.567256	1.39885e-49	-0.414384	1.93601e-48	-1.38098	0	-0.966593	3.27341e-160
CL5947.Contig3_All	73.35	23.94	84.78	40.56	19.38	21.16	39.23	33.1	44.72	47.56	103.78	76.76	-1.16033	0	-0.624258	7.01032e-127	0.336702	4.05705e-53	0.536068	2.38044e-63	1.49703	0	0.96096	0
CL5959.Contig3_All	28.21	28.24	13.44	36.59	61.51	45.37	27.43	33.06	39.28	9.91	14.07	25.47	1.03971	0	0.5234	5.68011e-80	-0.48881	2.43091e-50	-0.516309	1.19776e-110	-1.52852	0	-1.01221	5.58624e-250
CL5979.Contig3_All	16.26	45.84	19.41	8.35	8.12	12.43	11.13	6.16	6.53	6.16	9.61	12.55	-1.48968	9.40056e-133	-1.75227	1.00461e-166	-1.50215	3.30105e-135	-0.26259	0.000581758	-0.0124612	0.134919	0.250129	0.000850466
CL5979.Contig4_All	44.22	66.59	54.35	11.76	17.91	32.31	11.75	8.88	13.35	13.21	21.68	16.65	-1.41185	0	-2.27032	0	-1.67014	0	-0.858466	1.33918e-82	-0.258286	2.93232e-11	0.60018	3.11001e-38
CL5990.Contig2_All	11.47	13.57	11.88	29.44	21.7	20.52	23.89	25.11	24.92	7.89	15.95	15.08	0.96419	1.02351e-66	1.02401	2.5438e-76	0.0960634	0.0369876	0.0598231	0.0589188	-0.868127	6.77903e-57	-0.92795	2.03624e-65
CL5994.Contig7_All	12.31	13.92	10.96	11.79	19.28	14.29	3.46	12.35	8.65	6.06	6.52	4.78	0.287889	9.37402e-16	-0.58992	9.43561e-45	-1.09401	5.43898e-127	-0.877809	1.25036e-106	-1.3819	1.03565e-222	-0.504087	1.90139e-23
CL6007.Contig5_All	30.09	21.32	43.42	10.12	9.8	10.64	12.7	12.52	10.8	35.52	62.16	62.33	-1.63075	0	-1.38778	0	0.76173	5.19366e-282	0.242974	1.98375e-09	2.39248	0	2.14951	0
CL6007.Contig7_All	19.99	10.1	29.88	8.21	5.35	8.57	3.25	6.89	6.18	10.28	25.15	18.81	-1.43515	2.27338e-292	-1.86588	0	-0.138478	3.91157e-06	-0.430728	1.82817e-15	1.29667	2.32969e-229	1.7274	0
CL6007.Contig8_All	8.84	7.34	13.37	7.14	3.37	4.23	4.69	5.21	6.75	10.93	31.08	28.22	-0.99945	8.92722e-75	-0.819073	8.12078e-54	1.25611	2.42434e-255	0.180377	0.0016042	2.25556	0	2.07518	0
CL6036.Contig18_All	12.65	13.09	5.52	21.94	17.25	22.05	9.38	13.33	25.03	3.19	4.92	7.23	0.973415	5.11911e-152	0.619763	1.72026e-55	-1.01798	1.00813e-84	-0.353652	2.84856e-26	-1.99139	0	-1.63774	1.03449e-266
CL6036.Contig8_All	21.9	31.34	10.99	33.81	43.17	56.43	16.57	27.15	38.94	4.1	6.02	10.25	1.05684	0	0.375066	2.04678e-32	-1.64555	5.73289e-297	-0.68177	2.50013e-147	-2.70238	0	-2.02061	0
CL6044.Contig1_All	10.05	11.97	3.38	17.65	47.66	34.73	5.06	15.05	15.9	1.48	3.42	3.28	1.98243	2.41386e-276	0.525843	1.90928e-13	-1.61743	1.20444e-54	-1.45658	1.1312e-178	-3.59986	0	-2.14327	1.57843e-112
CL6045.Contig8_All	10.44	14.59	6.17	17.1	11.4	17.77	7.93	13.72	13.92	4.61	10.73	6.13	0.571171	1.64481e-116	0.196609	9.91178e-14	-0.537355	2.02514e-71	-0.374562	2.53933e-54	-1.10853	0	-0.733965	3.62785e-140
CL6053.Contig1_All	9.29	9.73	8.33	13.31	17.04	20.43	6.48	10.01	8.21	4.49	8.21	7.22	0.896349	3.30954e-64	-0.130392	0.0138138	-0.445078	1.22187e-11	-1.02674	1.21234e-79	-1.34143	1.27488e-122	-0.314686	1.7659e-06
CL6053.Contig2_All	12.75	13.27	10.45	19.95	23.42	21.12	10.37	16.15	17.01	6.58	11.56	10.65	0.826739	9.22127e-70	0.27164	7.66427e-08	-0.329111	3.67007e-09	-0.555099	2.64712e-35	-1.15585	2.38972e-121	-0.600752	2.44413e-28
CL6055.Contig14_All	29.46	16.76	42.01	68.85	37.16	56.13	73.68	76.46	63.61	27.6	37.49	36.81	0.881413	0	1.28486	0	0.213872	1.36999e-20	0.403449	4.91828e-131	-0.667541	6.76511e-249	-1.07099	0
CL6069.Contig3_All	9.68	3.88	11.24	10.66	3.94	9.85	2.35	6.64	10.1	13.12	27.84	23.71	-0.015167	0.203343	-0.361866	1.0599e-07	1.39535	1.74362e-164	-0.346699	3.47919e-07	1.41051	2.10393e-167	1.75721	1.78351e-228
CL6069.Contig9_All	79.65	67.47	118.17	102.47	48.74	46.35	121.18	92.1	81.26	109.11	151.7	170.26	-0.418667	3.64008e-87	0.164961	5.22099e-18	0.713246	0	0.583628	1.26333e-176	1.13191	0	0.548284	7.8101e-232
CL607.Contig13_All	19.08	31.75	23.54	42.33	33.74	25.66	44.49	39.71	50.09	14.68	20.56	30.24	0.45639	5.00533e-47	0.863769	8.44823e-188	-0.171788	4.55308e-07	0.407379	3.83905e-50	-0.628178	2.50869e-83	-1.03556	5.36152e-255
CL6087.Contig4_All	10.11	12.03	3.96	14.23	11.25	12.73	20.19	20.13	8.65	3.82	2.85	7.14	0.554562	2.96289e-19	0.926559	6.53847e-57	-0.901128	7.75097e-30	0.371997	1.40513e-12	-1.45569	2.00286e-90	-1.82769	1.54383e-159
CL6090.Contig3_All	6.82	7.51	4.7	9.64	13.35	21.49	6.47	11.49	12.2	4	12.35	12.35	1.22629	1.51719e-178	0.674936	6.95344e-46	0.600239	3.45648e-36	-0.551358	1.07778e-46	-0.626055	3.39532e-59	-0.0746967	0.0233027
CL6098.Contig2_All	50.49	55.24	39.88	138.42	105.98	104.85	85.55	73.43	119.47	30.77	28.92	20.65	1.26882	0	0.953675	1.211e-269	-0.844402	2.06576e-115	-0.315149	4.42091e-47	-2.11323	0	-1.79808	0
CL6105.Contig3_All	35.24	84.73	35.11	147.51	175.67	105.8	118.76	165.44	128.23	20.18	7.86	20.95	1.47317	0	1.42925	0	-1.64851	0	-0.0439231	0.0029642	-3.12168	0	-3.07776	0
CL6112.Contig3_All	11	16.96	4.69	21.8	31.6	29.27	4.74	12.91	18.94	2.87	4.03	4.99	1.34075	0	0.171906	4.58582e-10	-1.4539	0	-1.16884	0	-2.79464	0	-1.6258	0
CL6119.Contig2_All	8.95	11.24	8.02	10.55	21.65	15.68	7.19	11.5	13.53	3.57	5.51	7.68	0.764646	1.49446e-77	0.202103	3.95453e-06	-0.741522	2.01008e-44	-0.562543	1.50357e-45	-1.50617	8.865e-231	-0.943625	2.20603e-75
CL6119.Contig5_All	12.04	15.68	10.39	18.81	24.21	20.2	11.94	16.11	18.39	5.61	9.84	10.85	0.732551	9.62626e-96	0.294986	6.98683e-15	-0.527429	1.43603e-33	-0.437566	9.65611e-39	-1.25998	5.66442e-235	-0.822415	9.98783e-87
CL6140.Contig1_All	59.16	25.91	66.99	35.26	13.31	25.73	37.72	31.54	36.01	34.33	75.93	55.04	-1.02868	0	-0.522392	2.81793e-125	0.127177	3.65758e-11	0.506292	8.2744e-83	1.15586	0	0.649569	2.19408e-202
CL6146.Contig2_All	14.26	15.57	13.91	23.28	20.3	18.11	17.19	19.41	26.05	5.98	10.27	14.42	0.501121	7.95696e-30	0.532476	1.13093e-33	-0.497698	1.42204e-21	0.0313554	0.118482	-0.998819	2.84151e-96	-1.03017	1.18957e-102
CL616.Contig21_All	267.94	177.53	397.09	20.01	10.18	9.05	4.33	10.01	10.06	139.58	240.46	229.03	-4.41881	0	-5.09585	0	-0.459295	0	-0.677041	1.95123e-44	3.95951	0	4.63655	0
CL616.Contig22_All	24.71	10.76	28.11	13.02	5.21	6.66	8.3	6.38	5.81	15.67	33.47	39.75	-1.34746	2.86449e-248	-1.62509	0	0.492586	1.56228e-64	-0.277631	9.66741e-08	1.84004	0	2.11767	0
CL6160.Contig1_All	6.01	10.32	4.48	35.07	30.9	25.73	8.7	13.51	14.07	2.35	3.93	5.7	2.14494	0	0.8189	8.50433e-38	-0.781827	6.29283e-21	-1.32605	6.56235e-200	-2.92677	0	-1.60073	3.47658e-107
CL6177.Contig1_All	17.66	17.4	26.2	24.98	13.35	10.01	15.25	17.11	19.95	23.42	42.41	41.76	-0.336948	3.19728e-25	-0.219349	4.06186e-12	0.81957	1.13623e-209	0.117599	0.000214315	1.15652	0	1.03892	0
CL6177.Contig3_All	18.99	11.63	22.32	13.7	8.42	9.86	5.26	10.03	9.58	16.08	30.39	27.9	-0.723844	9.58433e-107	-1.0802	8.59335e-208	0.495576	2.22529e-77	-0.356355	3.09055e-19	1.21942	0	1.57577	0
CL6177.Contig6_All	25.23	7.96	27.08	8.31	9.82	13.63	1.8	8.09	6.2	4.07	6.8	4.22	-0.922772	7.2569e-185	-1.89069	0	-1.99341	0	-0.96792	8.31026e-106	-1.07064	2.67908e-126	-0.102721	0.0158358
CL6194.Contig8_All	9.87	18.56	7.17	37.04	32.7	24.73	33.34	34.04	27.44	6.31	4.57	12.17	1.41179	0	1.42357	0	-0.616471	1.10937e-40	0.0117807	0.166502	-2.02826	0	-2.04004	0
CL6201.Contig5_All	8.45	5.96	11.06	14.54	9.19	10.54	32.23	16.25	23.14	15.32	15.69	21.79	0.433892	5.81651e-14	1.50262	1.18013e-211	1.06437	4.19813e-93	1.06873	6.92612e-125	0.630482	2.17361e-39	-0.438247	8.28961e-28
CL6202.Contig6_All	33.09	33.91	19.32	12.79	39.15	38.94	23.28	22.68	19.92	5.41	6.95	5.89	0.0762431	0.00490851	-0.377462	2.77147e-29	-2.23247	0	-0.453705	1.88604e-42	-2.30872	0	-1.85501	0
CL6202.Contig7_All	24.1	37.52	31.4	25.19	44.93	52.79	24.78	30.2	19.57	8.01	7.72	8.72	0.402914	3.72526e-70	-0.309036	3.80305e-33	-1.92099	0	-0.71195	1.13631e-192	-2.32391	0	-1.61196	0
CL6203.Contig4_All	9	9.73	7.42	17.81	16.6	19.06	8.61	20.79	17.19	2.47	4.16	4.37	1.03386	1.47552e-289	0.843359	2.11685e-180	-1.2442	4.29101e-192	-0.190504	7.59855e-15	-2.27806	0	-2.08756	0
CL6203.Contig8_All	18.97	21.26	16.43	27.84	31.12	33.83	18.9	24.13	17.32	4.83	11.49	11.65	0.713125	3.92072e-235	0.0988194	2.20394e-05	-1.01408	1.24079e-262	-0.614305	4.99875e-180	-1.7272	0	-1.1129	0
CL6204.Contig12_All	14.66	34.48	14.17	33.93	32.7	23.89	29.79	44.07	34.69	11.5	13.02	28.17	0.51863	1.76451e-83	0.788413	1.65947e-208	-0.255546	3.51742e-17	0.269783	1.02033e-30	-0.774176	1.11297e-169	-1.04396	0
CL6204.Contig8_All	16.03	31.15	16.25	40.22	25.59	24.08	49.92	47.19	50.57	11.45	18.54	37.92	0.50699	4.44751e-66	1.22831	0	0.10931	0.000187005	0.721325	4.59281e-200	-0.39768	1.69626e-43	-1.119	0
CL6211.Contig4_All	22.49	32.32	21.94	41.78	41.92	41.08	26.11	68.2	49.55	12.45	14.86	12.62	0.704136	1.38237e-171	0.920851	0	-0.935635	1.2016e-172	0.216714	7.72877e-24	-1.63977	0	-1.85649	0
CL6211.Contig7_All	6.04	8.91	6.4	19.53	16.11	16.86	16.46	20.05	17.04	1.64	4.52	7	1.30136	1.47468e-195	1.33723	2.71922e-208	-0.688247	2.90493e-29	0.0358755	0.0849126	-1.9896	0	-2.02548	0
CL6212.Contig1_All	13.72	19.26	10.19	17.86	24.26	22.59	9.58	14.9	16.02	7.82	10.82	10.6	0.586904	3.37824e-50	-0.0790763	0.0247975	-0.552663	5.36009e-31	-0.66598	4.28774e-62	-1.13957	1.23866e-153	-0.473587	1.4227e-22
CL6215.Contig1_All	27.45	19.08	49.01	27.14	20.04	21.7	20.23	21.68	31.42	40.27	66.92	61.89	-0.464273	1.1807e-27	-0.361306	5.47055e-18	0.841954	3.51119e-136	0.102966	0.0080746	1.30623	2.30903e-277	1.20326	5.54315e-243
CL6238.Contig2_All	14.27	11.7	19.03	11.39	6.21	8.24	12.83	4.91	12.4	17.62	43.23	41.52	-0.795478	9.31158e-66	-0.572543	1.67279e-37	1.19553	9.88245e-292	0.222935	6.76273e-06	1.99101	0	1.76807	0
CL6243.Contig5_All	51.37	84.42	24.93	138.26	226.59	182.63	139.21	201.99	260.79	21.06	38.51	52.82	1.77084	0	1.91702	0	-0.505061	1.12333e-97	0.146174	9.2314e-36	-2.2759	0	-2.42208	0
CL625.Contig3_All	9.56	12.53	10.93	18.07	16.43	12.61	20.33	23.46	18.03	6.38	11.36	9.62	0.518219	6.54451e-22	0.922306	1.10168e-74	-0.258603	1.05086e-05	0.404087	1.51617e-18	-0.776823	1.20248e-43	-1.18091	1.27847e-111
CL6256.Contig3_All	10.85	14.3	19.57	20.56	16.75	16.29	16.48	25.15	23.75	2.21	6.44	6.29	0.264524	1.00793e-14	0.558282	4.2707e-65	-1.57426	1.80529e-244	0.293759	5.30752e-21	-1.83879	0	-2.13254	0
CL6257.Contig18_All	56.08	26.79	98.68	10.18	3.99	7.15	4.96	10.06	3.61	33.49	46.08	55.2	-3.08618	0	-3.26911	0	-0.4222	7.76172e-108	-0.182931	0.000277439	2.66398	0	2.84691	0
CL6300.Contig1_All	124.69	64.69	74.58	41.62	53.06	54.1	30.95	50.99	34	48.89	95.2	71.6	-0.821537	3.70622e-197	-1.16368	0	-0.275132	1.52139e-28	-0.342141	2.43616e-24	0.546405	3.95758e-81	0.888547	1.24029e-186
CL6312.Contig1_All	22.02	16.92	47.44	21.22	13.03	15.89	27.01	27.31	38.01	20.08	16.39	8.07	-0.780039	3.51721e-113	0.106657	0.000140127	-0.949999	1.53713e-158	0.886696	2.12847e-150	-0.16996	6.57391e-06	-1.05666	3.48128e-202
CL6317.Contig14_All	3.67	11.18	12.23	20.16	16.31	10.65	20.33	20.41	24.95	8.75	15.01	17.1	0.80041	7.96031e-169	1.28164	0	0.596484	8.85925e-89	0.48123	2.07647e-95	-0.203926	1.40412e-15	-0.685156	6.09942e-180
CL6318.Contig6_All	35.58	29.59	28.7	17.4	18.98	11.78	8.51	10.35	10.9	7.31	18.16	13.68	-0.960004	4.13593e-256	-1.64826	0	-1.25557	0	-0.688258	3.527e-75	-0.295562	7.3373e-18	0.392696	1.33574e-23
CL632.Contig22_All	6.7	11.32	4.09	20.24	21.53	23.14	15.34	16.19	26.51	3.63	6.09	10.3	1.5582	3.12152e-175	1.40658	1.95238e-135	-0.127008	0.0234924	-0.151618	0.000198329	-1.6852	2.58671e-197	-1.53359	1.32221e-154
CL6328.Contig1_All	50.38	57.53	31.81	15.46	44.81	32.36	13.12	19.49	10.61	15.58	22.47	18.72	-0.591811	8.62321e-135	-1.67977	0	-1.29224	0	-1.08796	8.86466e-252	-0.700426	7.72182e-122	0.387529	6.53299e-27
CL6375.Contig6_All	5.32	5.28	9.02	15.36	10.31	8.77	17.8	16.41	20.52	3.71	13.06	8.84	0.818852	7.80867e-32	1.49726	2.59249e-128	0.399579	4.13189e-08	0.678404	3.10029e-36	-0.419273	3.07208e-11	-1.09768	2.6236e-80
CL6376.Contig4_All	20.68	15.63	26.28	14.45	8.12	10.84	8.8	13.13	13.88	26.17	45.59	37	-0.900607	1.83996e-89	-0.790803	8.64051e-72	0.8075	5.24914e-130	0.109804	0.0111217	1.70811	0	1.5983	0
CL6385.Contig6_All	91.22	40.32	52.49	166.29	134.21	83.19	77.88	108.06	96.64	35.91	28.62	62.09	1.06429	0	0.629553	0	-0.529911	6.56512e-172	-0.434737	1.21505e-246	-1.5942	0	-1.15946	0
CL6387.Contig19_All	14.28	7.43	11.7	19.74	15.92	15.33	26.05	21.4	21.17	9.58	13.77	14.63	0.613648	1.71997e-72	1.0454	1.82514e-239	0.191455	7.13088e-08	0.431748	8.27268e-52	-0.422193	3.75095e-38	-0.853941	4.47719e-172
CL6390.Contig1_All	15.56	15.15	15.94	32.19	26.25	25.23	17.49	25.52	26.11	3.03	7.61	5.94	0.847276	2.26981e-114	0.581351	5.53122e-50	-1.48193	2.17032e-156	-0.265926	2.49211e-15	-2.32921	0	-2.06328	0
CL6403.Contig4_All	218.28	362.47	243.25	169.12	131.53	107.07	110.35	249.4	108.23	99.72	184.63	199.95	-1.01074	0	-0.798712	0	-0.75687	0	0.212026	4.38554e-57	0.253868	1.79856e-83	0.0418418	0.000358219
CL6421.Contig19_All	7.26	5.29	13.58	18.85	5.22	17.27	8.66	23.03	32.33	1.87	2.65	4.46	0.665908	1.03441e-63	1.30288	1.23001e-296	-1.53237	8.1242e-156	0.636975	2.63549e-90	-2.19828	0	-2.83526	0
CL6421.Contig29_All	55.95	80.18	61.4	68.64	42.81	23.96	77.31	50.37	64.01	62.9	136.48	116.33	-0.540181	8.78018e-187	-0.0374456	0.00989608	0.683047	0	0.502735	3.9679e-159	1.22323	0	0.720492	0
CL6421.Contig52_All	28.79	35.46	46.74	49.11	30.47	39.29	47.63	48.87	66.46	12.45	27.34	16.85	0.102391	1.65441e-06	0.561852	4.88088e-167	-0.965305	8.19493e-292	0.459461	5.01126e-116	-1.0677	0	-1.52716	0
CL6421.Contig58_All	144.9	66.65	162.84	179.5	107.51	144.59	71.37	190.91	179.9	32.35	58.7	27.69	0.209453	7.15796e-58	0.254386	1.54755e-85	-1.65075	0	0.0449329	0.000140941	-1.8602	0	-1.90513	0
CL6421.Contig59_All	63.28	38.15	69.83	66.21	46.28	76.89	44.96	103.6	109.29	16.96	27.36	20.86	0.147852	1.95293e-19	0.60135	0	-1.38847	0	0.453498	1.05821e-204	-1.53632	0	-1.98982	0
CL6421.Contig6_All	46.17	14.74	43.71	41.26	18.36	58.51	21.73	73.56	42.54	5.56	7.15	6.12	0.179505	3.58839e-10	0.417939	1.04516e-50	-2.46369	0	0.238434	9.72964e-19	-2.64319	0	-2.88163	0
CL6422.Contig2_All	22.74	15.68	26.39	11.68	5.01	9.57	4.68	11.81	12.75	20.6	37.66	33.14	-1.29951	3.98837e-248	-1.13606	2.35078e-200	0.503222	3.11716e-71	0.163451	0.000220844	1.80274	0	1.63928	0
CL6424.Contig4_All	4.92	7	5.97	31.55	25.59	30.53	47.01	31.23	37.61	2.55	3.6	6.56	2.29531	0	2.69941	0	-0.485879	2.12595e-19	0.404097	1.19506e-81	-2.78119	0	-3.18529	0
CL6438.Contig1_All	22.47	25.77	19.9	7.83	3.9	4.61	1.87	4.36	4.05	7.46	12.49	14.68	-2.05582	0	-2.71737	0	-0.969007	2.56217e-183	-0.661549	3.32064e-24	1.08681	4.76625e-114	1.74836	2.77242e-231
CL6438.Contig3_All	20.32	34.19	19.24	6.14	3.07	4.24	2.12	2.78	3.79	5.98	12.46	14.75	-2.45206	0	-3.0775	0	-1.14561	7.52696e-295	-0.625434	1.00268e-20	1.30645	6.33985e-165	1.93188	1.89664e-287
CL6465.Contig12_All	100.04	30.63	138.06	13.83	13.47	15.34	5.54	18.35	12.82	25.57	49.59	32.5	-2.65416	0	-2.86031	0	-1.31695	0	-0.206148	1.08625e-13	1.33721	0	1.54336	0
CL6465.Contig2_All	76.59	36.04	110.57	34.93	18.35	17.13	29.59	28.55	38.45	50.13	90.57	87.81	-1.66109	0	-1.20436	0	0.0375132	0.000329355	0.456728	2.11615e-129	1.6986	0	1.24188	0
CL6465.Contig5_All	48.01	26.65	81.34	27.5	8.77	23.73	9.69	34.41	30.08	34.8	84.17	54.43	-1.37534	0	-1.06206	0	0.154545	6.8916e-32	0.313279	2.1641e-51	1.52989	0	1.21661	0
CL6471.Contig1_All	20.79	34.54	48.78	84.95	45.46	30.3	90.81	60.43	69.6	41.85	85.12	93.47	0.636103	4.06662e-73	1.10676	2.57016e-255	1.1038	5.4649e-256	0.47066	8.61099e-59	0.467697	5.07971e-59	-0.00296331	0.214564
CL649.Contig1_All	37.92	39.5	37.68	57.63	83.15	52.52	41.69	48.14	38.21	14.46	21.82	18.36	0.751891	4.0097e-207	0.167912	3.72211e-10	-1.06497	1.49167e-222	-0.583979	2.36947e-132	-1.81686	0	-1.23288	0
CL649.Contig2_All	67.19	85.94	60.84	166.2	174.35	114.71	127	129.16	110.1	25.79	39.26	38.8	1.09462	0	0.791486	0	-1.03001	0	-0.303133	4.99392e-76	-2.12463	0	-1.8215	0
CL649.Contig4_All	12.41	17.13	16.41	40.35	13.93	23.54	40.25	26.35	28.47	8.49	9.21	16.96	0.766125	3.31427e-76	1.06148	1.41204e-159	-0.392441	4.54526e-15	0.295354	9.89864e-18	-1.15857	1.60882e-151	-1.45392	1.52288e-261
CL649.Contig5_All	16.24	15.69	17	20.48	29.21	26.18	8.82	21.36	16.65	4.51	9.22	5.09	0.636896	2.52342e-53	-0.0449234	0.0997087	-1.368	3.33787e-121	-0.681819	1.28949e-59	-2.0049	0	-1.32308	2.74925e-111
CL65.Contig6_All	10.25	10.57	12.12	18.28	14.57	16.73	6.28	8.14	8.36	7.96	8.67	9.11	0.593259	1.40871e-47	-0.521022	9.55248e-26	-0.348193	2.30336e-13	-1.11428	6.65865e-136	-0.941451	6.96114e-105	0.17283	0.000379117
CL652.Contig14_All	32.63	61.71	27.6	107.99	99.92	63.68	93.84	158.42	130.85	9.42	5.31	10.41	1.15809	0	1.66164	0	-2.27151	0	0.50355	0	-3.4296	0	-3.93315	0
CL652.Contig2_All	29.13	50.76	22.38	91.58	123.26	60.54	55.61	152.19	75.7	4.88	3.01	5.36	1.43121	0	1.48537	0	-2.94115	0	0.0541636	1.64723e-05	-4.37236	0	-4.42652	0
CL6522.Contig1_All	20.33	22.03	38.22	39.13	39.8	25.87	15.51	35.48	28.31	18.41	15.22	13.4	0.382071	2.2435e-54	-0.0104883	0.188884	-0.771223	2.44736e-146	-0.392559	8.5339e-57	-1.15329	0	-0.760734	2.52857e-141
CL6522.Contig2_All	145.51	140.42	191.95	176.27	102.44	104.76	162	174.73	224.21	208.48	264.39	301.23	-0.313551	2.44148e-169	0.239166	1.86042e-119	0.702856	0	0.552718	0	1.01641	0	0.463689	0
CL6522.Contig9_All	22.33	17.29	19.14	16.67	15.35	28.32	5.22	20.7	21.03	4.99	13.2	6.73	0.0402778	0.0399517	-0.311589	7.08171e-28	-1.23381	2.28912e-301	-0.351867	1.99046e-35	-1.27409	0	-0.922219	2.28622e-151
CL653.Contig14_All	12.29	15.99	16.15	13.43	16.82	18.44	6.51	28.33	28.7	4.11	2.54	5.93	0.134812	0.000357204	0.53189	1.21789e-44	-1.80796	7.68637e-224	0.397078	8.74337e-27	-1.94277	1.24438e-270	-2.33985	0
CL6562.Contig1_All	128.01	139.94	116.43	58.13	55.58	68.27	74.4	80.74	64.37	78.66	136.21	85.97	-1.07504	0	-0.794519	0	-0.344791	1.34961e-102	0.280521	1.11239e-40	0.730249	0	0.449728	1.9887e-131
CL6563.Contig11_All	11.8	18.87	12.72	19.52	10.96	18.18	26.3	14.33	19.71	3.87	5.93	5.15	0.168717	2.60731e-07	0.479933	4.08988e-51	-1.53101	3.73118e-254	0.311217	9.08158e-24	-1.69973	0	-2.01095	0
CL6563.Contig26_All	12.44	9.28	7.25	14.79	8.35	13.92	12.79	22.14	17.23	1.35	3.62	4.28	0.358957	1.36039e-20	0.859813	2.30704e-129	-1.63956	1.02139e-198	0.500856	1.03676e-50	-1.99851	0	-2.49937	0
CL6572.Contig45_All	12.21	10.73	11.93	19.05	12.79	15.1	23.77	19.42	24.39	5.81	15.99	9.75	0.432777	1.33878e-24	0.963481	5.71492e-137	-0.137042	0.00107976	0.530704	2.43492e-49	-0.569819	5.00183e-40	-1.10052	7.49755e-171
CL6575.Contig22_All	15.2	27.01	13	19.28	15	24.6	4.32	15.37	14.7	9.36	5.76	6.14	0.0954382	0.00162189	-0.668711	2.34604e-68	-1.37037	4.42592e-223	-0.764149	1.96007e-91	-1.46581	1.13767e-263	-0.701659	1.20128e-47
CL6578.Contig4_All	12.45	11.03	8.94	17.53	26.16	18.3	11.5	15.4	25.47	3.34	3.55	7.85	0.93931	2.21726e-83	0.705674	3.81545e-44	-1.12129	3.84157e-59	-0.233636	3.10767e-08	-2.0606	6.79371e-270	-1.82696	3.29917e-195
CL6590.Contig2_All	31.05	13.56	44.68	17.59	7.02	11.6	5.81	12.14	9.52	13.39	27.79	15.32	-1.29758	0	-1.69027	0	-0.656785	6.30861e-158	-0.392689	2.02384e-26	0.640798	7.074e-97	1.03349	4.13278e-216
CL6592.Contig4_All	23.89	13.24	23.58	28.1	28.73	40.05	7.36	29.72	28.57	5.79	9.03	5.41	0.676772	7.90258e-119	0.127582	3.36829e-05	-1.57917	3.07214e-295	-0.54919	6.62221e-82	-2.25595	0	-1.70676	0
CL660.Contig2_All	31.87	15.28	48.47	22.92	9.92	13.31	8.25	13.68	16.72	12.28	28.62	19.35	-1.04569	8.94235e-233	-1.29532	0	-0.658933	2.71963e-107	-0.24963	3.48883e-10	0.38676	1.82147e-27	0.63639	2.3906e-64
CL660.Contig7_All	18.73	9.29	33.65	10.32	4.28	7.8	3.26	10.1	8.79	8.89	7.22	3.49	-1.45641	1.98043e-258	-1.46249	3.38131e-259	-1.64861	0	-0.00607187	0.224007	-0.192194	0.000140207	-0.186122	0.000361153
CL6601.Contig8_All	18.29	17.9	13.27	23.56	39.11	31.47	9.14	16.48	22.34	5.72	13.63	11.25	0.930329	3.74147e-240	-0.0344927	0.090538	-0.685936	2.90219e-76	-0.964821	7.16372e-254	-1.61626	0	-0.651443	7.27934e-68
CL6618.Contig10_All	0.89	2.48	1.41	17.72	25.98	20.1	9.61	24.49	19.85	0.48	1.46	1.41	3.74007	0	3.50744	0	-0.503371	8.6651e-09	-0.23263	3.49161e-23	-4.24344	0	-4.01081	0
CL663.Contig5_All	10.69	3.77	6.33	15.56	10.47	12	14.36	20.82	20.86	4.64	16.18	14.44	0.874709	4.32527e-123	1.43931	0	0.767565	2.21887e-92	0.564602	1.4599e-84	-0.107143	0.000200237	-0.671745	1.57209e-115
CL663.Contig7_All	13.18	5.46	8.8	20.31	12.99	17.66	21.22	25.94	34.93	4.16	8.17	10.74	0.896481	1.95072e-248	1.5866	0	-0.244804	2.26453e-14	0.69012	7.33043e-254	-1.14129	0	-1.83141	0
CL6630.Contig1_All	8.98	8.83	13.16	14.05	9.97	10.99	14.27	22.06	20.38	5.37	5.96	11.79	0.18124	4.61017e-05	0.885805	2.97791e-101	-0.410598	1.10457e-15	0.704566	1.2058e-68	-0.591838	1.26346e-32	-1.2964	1.46625e-187
CL6630.Contig3_All	30.98	23.96	45.38	41.85	24.28	35.58	76.29	69.36	64	29.59	35.3	44.52	0.024666	0.111488	1.07634	0	0.136811	1.15607e-06	1.05168	0	0.112146	2.61966e-05	-0.93953	0
CL6630.Contig4_All	16.94	28.89	22.51	47.73	38.38	29.18	31.24	38.21	32.81	10.75	11.8	20.19	0.759043	8.00281e-138	0.594479	2.40423e-80	-0.665229	5.11034e-66	-0.164564	1.21228e-09	-1.42427	0	-1.25971	1.90172e-283
CL6630.Contig5_All	7.07	8.65	13.47	16.2	9.84	9.63	35.22	18.2	18.77	16.42	20.37	17.17	0.292757	1.6781e-14	1.30948	0	0.891108	5.66383e-147	1.01672	4.97054e-241	0.598351	1.47444e-74	-0.418368	5.4144e-52
CL6642.Contig8_All	6.13	9.24	7.03	16.23	8.31	5.78	13.94	9.1	12.85	10.57	19.12	19.33	0.441412	1.39318e-37	0.682482	1.93804e-94	1.13433	5.00977e-304	0.241071	2.80324e-15	0.692914	1.89332e-133	0.451844	2.67376e-62
CL6658.Contig10_All	27.62	28.72	20.07	61.87	42	52.7	22.56	34.2	37.62	5.99	12.95	17.6	1.03869	0	0.315509	5.7306e-33	-1.05529	1.53832e-220	-0.723182	4.80825e-236	-2.09398	0	-1.3708	0
CL6674.Contig7_All	35.97	52.31	47.81	12.79	16.13	16.72	5.02	11.14	10.27	13.05	23.85	34.85	-1.57502	0	-2.35416	0	-0.917049	0	-0.779138	3.45e-115	0.657972	1.13939e-136	1.43711	0
CL6684.Contig4_All	10.82	21.37	8.62	10.51	15.31	17.49	4.78	11.25	18.82	3.2	3.41	5.34	0.0885873	0.0194285	-0.213891	8.82783e-06	-1.75897	1.37506e-161	-0.302478	4.66241e-10	-1.84756	8.24476e-184	-1.54508	8.65309e-116
CL669.Contig4_All	18.39	17.74	16.89	32.36	22.27	20.47	37.81	40.8	41.74	14.39	24.83	30.37	0.505003	7.54815e-117	1.18807	0	0.397126	8.2343e-71	0.683072	0	-0.107877	3.51207e-08	-0.790949	0
CL669.Contig7_All	20.04	21.41	28.33	37.66	24.12	21.98	54.57	43.69	42.56	23.71	27.97	33.29	0.266239	1.81752e-44	1.01622	0	0.288128	1.59309e-52	0.749978	0	0.0218897	0.0382839	-0.728088	0
CL6694.Contig6_All	8.1	10.07	11.56	15.4	6.23	15.77	11.91	14.75	16.52	5.65	8.19	6.18	0.334967	2.12006e-14	0.548726	5.57495e-38	-0.563275	4.49118e-28	0.213759	5.70341e-08	-0.898242	7.71378e-77	-1.112	1.32916e-124
CL6722.Contig3_All	17.94	32.78	19.03	40.64	38.47	28.09	59.56	47.81	52.37	21.55	27.39	62.8	0.625976	8.95718e-63	1.21154	6.60497e-281	0.698513	3.45117e-80	0.585566	1.47517e-82	0.0725372	0.0052865	-0.513028	7.30085e-66
CL6734.Contig4_All	40.74	50.13	60.92	112.87	74.8	79.28	115.75	110.43	108.61	63.65	66.33	86.08	0.818445	0	1.15058	0	0.517668	6.20298e-166	0.332133	3.00374e-112	-0.300776	1.0725e-75	-0.632909	0
CL6742.Contig8_All	9.25	10.19	8.25	24.07	18.48	17.62	15.42	17.47	22.97	4.59	9.82	9.29	1.12376	4.17088e-150	1.02345	3.26422e-120	-0.215171	2.70218e-05	-0.100307	0.00206614	-1.33893	1.24969e-198	-1.23862	1.26963e-163
CL6744.Contig2_All	17.86	14.49	22.46	8.66	6.11	5.39	7.88	8.45	6.96	13.2	18.6	16.25	-1.44035	0	-1.22915	0	-0.187247	1.20931e-16	0.211203	1.15831e-09	1.2531	0	1.0419	2.05197e-298
CL6748.Contig4_All	46.51	15.81	63.66	4.3	2.01	5.25	0.63	1.29	2.09	36.04	71.56	77.53	-3.44454	0	-4.97133	0	0.558953	0	-1.52679	1.33326e-133	4.0035	0	5.53029	0
CL6755.Contig4_All	26	14.71	24.76	15.58	23.79	18.59	6.2	13	11.48	9.71	29.12	17.45	-0.172496	1.51148e-06	-1.07796	2.03359e-136	-0.209097	8.29449e-09	-0.905468	4.63336e-91	-0.0366002	0.0561463	0.868867	1.4442e-83
CL6776.Contig5_All	20.82	22.8	18.15	31.35	31.35	35.51	25.62	27.73	27.82	8.39	16.69	17.77	0.672781	1.85159e-91	0.407058	1.15165e-31	-0.516482	4.14011e-37	-0.265724	7.36789e-18	-1.18926	9.57506e-238	-0.923539	6.72156e-131
CL6784.Contig3_All	12.93	12.61	13.73	14.3	15.93	22.71	14.83	21.13	22.45	3.78	6.74	6.64	0.432538	1.15663e-32	0.582975	1.26136e-60	-1.18713	3.84391e-135	0.150437	2.40283e-06	-1.61967	2.40068e-290	-1.7701	0
CL6784.Contig5_All	23.82	23.68	24.65	36.46	12.37	35.87	54.9	48.33	41.59	9.73	13.99	11.99	0.235593	2.22893e-15	1.01531	0	-1.0067	1.94023e-163	0.779715	1.4935e-211	-1.24229	4.36411e-269	-2.02201	0
CL6793.Contig2_All	32.05	35.37	25.32	55.06	41.75	45.91	27.55	33.43	30.76	10.89	20.75	35.74	0.625742	7.09271e-138	-0.00396492	0.234511	-0.449351	1.62508e-50	-0.629706	1.05325e-138	-1.07509	0	-0.445386	2.36832e-49
CL6793.Contig6_All	46.75	71	38.19	96.8	70.15	82.52	61.94	79.62	62.59	16.69	35.3	53.9	0.682109	2.51855e-236	0.402647	1.07572e-75	-0.545616	1.95333e-100	-0.279462	8.46678e-47	-1.22772	0	-0.948263	0
CL6793.Contig7_All	27.41	34.7	23.5	48.2	36.05	39.75	23	49.95	35.7	8.55	20.73	30.54	0.538644	1.95401e-88	0.359371	6.0105e-38	-0.505742	2.19454e-55	-0.179273	1.1945e-12	-1.04439	4.39462e-277	-0.865113	1.92739e-178
CL6798.Contig2_All	17.88	28.16	18.53	40.71	39.34	28.31	31.39	29.9	31.92	9.66	13.08	17.47	0.754719	5.53712e-65	0.551926	3.18982e-33	-0.662534	6.8827e-32	-0.202793	2.61158e-07	-1.41725	2.94282e-180	-1.21446	2.88137e-123
CL6798.Contig4_All	11.69	14.87	5.19	17.21	17.89	13.31	19.11	21.61	23.77	8.61	19.17	23.19	0.615289	4.10887e-19	1.04589	1.54502e-59	0.705876	1.64267e-25	0.430598	6.3407e-14	0.0905869	0.0239486	-0.340011	1.03945e-09
CL6818.Contig1_All	23.13	13.82	32.76	4.96	2.36	2.82	5.87	5.5	4.86	16.01	26.56	19.37	-2.77766	0	-2.09613	0	-0.166444	5.37605e-12	0.681529	1.6511e-34	2.61121	0	1.92968	0
CL6818.Contig2_All	49.88	27.91	81.11	10.98	3.49	8.39	7.57	10.99	9.76	19.7	39.65	29.29	-2.7929	0	-2.47794	0	-0.836532	0	0.314967	3.30234e-12	1.95637	0	1.6414	0
CL6820.Contig2_All	27.4	46.41	26.01	92.23	48.81	57.65	28.87	45.5	48.86	9.31	22.7	33.59	0.998582	0	0.319417	1.96059e-26	-0.591016	7.03251e-64	-0.679165	9.12915e-159	-1.5896	0	-0.910433	1.5655e-165
CL6820.Contig4_All	25.51	40.07	24.07	60.67	41.91	46.57	36.12	44.73	52.03	10.7	26.25	36.97	0.739364	3.3894e-139	0.582283	3.13939e-82	-0.26358	2.50127e-14	-0.15708	2.24735e-09	-1.00294	3.47973e-234	-0.845863	1.55449e-157
CL6850.Contig1_All	16.22	15.95	9.76	22.5	30.91	39.33	17.33	32.01	28.88	3.55	2.56	6.09	1.14741	6.74289e-301	0.912012	2.53951e-175	-1.7721	1.21205e-262	-0.235395	5.32383e-19	-2.91951	0	-2.68411	0
CL6850.Contig6_All	8.75	9.37	5.57	17.82	20.43	23.05	10.39	18.08	15.46	2.34	3.59	4.56	1.37354	0	0.899761	2.10557e-194	-1.16948	4.32554e-162	-0.47378	1.54443e-87	-2.54302	0	-2.06924	0
CL6877.Contig4_All	19.4	17.45	12.87	14.74	9.01	13.73	5.99	7.94	8.42	8.07	10.33	18.91	-0.40476	3.52972e-60	-1.14697	0	-0.40874	1.1027e-61	-0.742209	4.86737e-133	-0.00398052	0.135824	0.738229	2.20192e-132
CL6887.Contig13_All	8.16	15.43	5.47	13.44	21.41	11.67	9.93	16.79	13.25	4.92	7.26	10.37	0.68019	4.21595e-95	0.469277	5.76763e-43	-0.360143	2.84049e-20	-0.210913	2.45818e-12	-1.04033	6.70269e-196	-0.82942	7.42396e-116
CL6888.Contig1_All	58.83	37.43	34.78	60.31	49.39	76.63	9.17	24.87	26.12	5.65	13.35	12.82	0.510688	1.47043e-170	-1.11104	0	-2.03497	0	-1.62173	0	-2.54566	0	-0.923931	1.29902e-157
CL6888.Contig2_All	195.27	271.11	145.52	407.22	316.42	317.24	113.47	298.07	262.16	58.86	101.17	150.57	0.769702	0	0.151476	1.97673e-61	-0.969863	0	-0.618227	0	-1.73957	0	-1.12134	0
CL6888.Contig4_All	116.87	104.97	106.94	96.25	86.2	102.99	36.01	64.36	60.91	21.8	50.72	56.23	-0.201121	2.31492e-51	-1.01639	0	-1.34496	0	-0.815264	0	-1.14384	0	-0.328579	1.67431e-64
CL6888.Contig5_All	33.71	12.47	19.19	11.81	19.84	21.03	6.29	13.4	11.51	4.02	7.86	9.66	-0.309759	1.0521e-29	-1.05566	4.03717e-251	-1.59432	0	-0.745899	2.63555e-113	-1.28456	1.38903e-279	-0.538659	2.23016e-39
CL6888.Contig7_All	20.89	22.75	11.84	37.6	25.78	25.87	10.92	23.42	21.25	5.6	8.24	16.06	0.689068	1.17349e-200	0.0128635	0.171147	-0.884342	8.77781e-193	-0.676204	3.53109e-193	-1.57341	0	-0.897206	1.94121e-198
CL6892.Contig6_All	16.73	8.09	23.43	22.62	12.11	10.82	15.66	17.31	26.33	5.32	11.01	11.02	-0.0777388	0.0177486	0.307997	4.05506e-16	-0.809298	1.91569e-69	0.385736	1.35046e-23	-0.731559	6.58124e-56	-1.1173	1.51516e-144
CL6893.Contig1_All	9.51	18.03	10	28.86	26.4	21.16	24.4	30.25	32.83	5.21	8.09	13.39	1.02948	5.63099e-146	1.23333	3.09257e-223	-0.479018	1.54475e-20	0.203849	1.87973e-10	-1.5085	7.98108e-266	-1.71235	0
CL691.Contig2_All	39.78	20.82	39.59	32.31	18.12	21.82	31.52	36.89	29.38	32.42	65.7	56.87	-0.467283	6.82978e-69	-0.0241345	0.0976539	0.636856	1.06054e-185	0.443149	2.56753e-61	1.10414	0	0.66099	1.94137e-197
CL6910.Contig45_All	0.12	0.09	0.15	10.99	17.47	17.73	20.35	25.31	31.05	0.07	0.13	0.16	6.97884	0	7.71857	0	-0.0160893	0.217979	0.739735	2.91404e-113	-6.99493	0	-7.73466	0
CL6913.Contig11_All	3.24	7.48	3.07	7.29	5.95	4.27	9.66	5.25	5.78	11.51	44.31	53.48	0.352298	7.39129e-05	0.60199	1.41931e-11	3.0064	0	0.249692	0.00123084	2.6541	0	2.40441	0
CL6913.Contig2_All	23.62	10.18	28.77	6.01	5.84	10.18	3.92	3.99	5.37	8.6	32.21	24.84	-1.50415	0	-2.22948	0	0.0748868	0.0019302	-0.725331	1.56212e-42	1.57903	0	2.30436	0
CL6926.Contig29_All	24.82	19.72	34.43	15.8	11.77	16.04	11.28	23.97	27.31	25.63	44.64	30.8	-0.853643	4.24759e-166	-0.325005	2.48035e-30	0.361484	4.84985e-47	0.528638	8.97233e-58	1.21513	0	0.686489	1.03286e-146
CL6927.Contig2_All	13.46	20.01	12.72	26.84	26.84	26.78	35.6	30.42	32.74	7.09	14.73	16.25	0.803761	1.72405e-114	1.10628	3.01822e-238	-0.269158	1.12276e-10	0.302518	3.95809e-25	-1.07292	4.25124e-186	-1.37544	0
CL6931.Contig6_All	11.53	12.44	15.22	25.9	18.27	15.5	14.33	17.04	14.25	3.09	9.08	7.5	0.610101	2.20854e-94	0.227409	4.63665e-13	-0.989611	1.30072e-142	-0.382692	5.136e-41	-1.59971	0	-1.21702	2.70485e-231
CL6932.Contig9_All	35.13	24.97	42.86	21.7	15.4	24.88	25.84	30.65	24.62	31.44	55.89	47.79	-0.729144	1.15153e-154	-0.3335	2.24971e-38	0.399099	5.68877e-70	0.395644	1.10837e-41	1.12824	0	0.7326	1.84368e-205
CL6953.Contig2_All	95.11	74.26	118.54	45.86	84.89	112.28	41.94	48.14	25.34	15.29	17.92	17.54	-0.241972	5.06614e-40	-1.30347	0	-2.49404	0	-1.0615	0	-2.25207	0	-1.19057	3.80432e-272
CL6968.Contig2_All	8.69	15.26	8.93	26.05	20.85	19.97	16.08	19.48	18.8	3.08	7.84	12.26	1.02881	9.53763e-119	0.739427	2.84234e-56	-0.490421	1.02956e-17	-0.289381	9.94219e-14	-1.51923	1.59027e-218	-1.22985	1.35277e-129
CL6969.Contig1_All	17.07	24.4	13.24	11.62	20.94	11.55	6.99	10.21	18.98	17.83	39.39	47.18	-0.305336	7.40175e-10	-0.580893	4.00764e-28	0.948643	4.26288e-122	-0.275557	3.99598e-07	1.25398	4.17246e-191	1.52954	1.78234e-256
CL7015.Contig1_All	60.64	76.19	41.64	26.69	33.72	28.68	38.03	16.96	32.04	36.52	39.51	21.26	-1.00051	0	-1.03437	0	-0.871871	0	-0.0338603	0.0364162	0.128635	2.71409e-10	0.162495	1.09025e-14
CL7017.Contig2_All	14.26	14.39	13.05	27.96	23.75	16.22	18.27	18.35	21.73	6.34	12.24	12.64	0.708927	2.04855e-71	0.496506	1.8957e-33	-0.406391	1.46329e-17	-0.212421	3.26631e-09	-1.11532	1.12581e-152	-0.902896	4.03291e-93
CL7029.Contig7_All	8.85	10.12	6.74	16.36	17.63	16.06	11.55	14.56	12.74	1.79	4.2	5.23	0.96417	2.68805e-124	0.606226	1.8839e-44	-1.18633	2.17805e-90	-0.357943	1.49324e-22	-2.1505	0	-1.79255	2.73576e-250
CL7057.Contig4_All	20.53	37.14	10.91	20.35	35.74	48.01	11.96	35.1	18.69	10.22	10.92	18.47	0.602294	1.80592e-236	-0.0483397	0.00687791	-0.786488	1.58067e-250	-0.650634	8.24866e-270	-1.38878	0	-0.738149	2.37998e-216
CL7058.Contig5_All	17.08	14.23	18.05	13.88	26.25	20.09	10.95	17.58	20.01	5.31	14.62	8.94	0.289455	9.56227e-16	-0.0115904	0.205306	-0.765976	8.82379e-70	-0.301046	9.88134e-17	-1.05543	1.21511e-144	-0.754385	3.62537e-67
CL706.Contig1_All	8.86	9.86	6.71	13.3	15.56	17.04	10.61	14.98	12.65	4.31	7.29	6.28	0.852835	3.24604e-266	0.594905	5.19211e-119	-0.505639	3.13624e-60	-0.25793	2.27994e-31	-1.35847	0	-1.10054	0
CL706.Contig14_All	14.46	7.82	9.62	12.45	24.04	15.74	8.47	11.18	11.34	4.56	8.26	7.31	0.712228	6.89493e-170	-0.0346207	0.0727167	-0.660372	3.63084e-92	-0.746848	1.656e-183	-1.3726	0	-0.625752	1.2913e-81
CL706.Contig3_All	9.74	13.91	6.32	12.14	23.28	17.94	10.88	15.77	12.95	3.91	6.99	6.13	0.832535	8.7264e-268	0.409358	4.00802e-57	-0.812253	8.71597e-146	-0.423176	1.63387e-80	-1.64479	0	-1.22161	0
CL7082.Contig3_All	14.96	19.06	20.94	51.47	25	23.69	53.93	44.88	56.92	8.84	23.94	25.1	0.870109	1.36963e-230	1.50883	0	0.0815423	0.00250053	0.638719	1.0178e-208	-0.788567	1.91276e-196	-1.42729	0
CL7082.Contig5_All	12.65	16.16	20.18	32.37	16.87	15.77	40.37	31.81	38.3	11.14	28.19	32.46	0.412319	4.20651e-41	1.17948	0	0.558679	3.39913e-78	0.76716	1.53676e-205	0.14636	3.65408e-08	-0.620799	4.30503e-143
CL7088.Contig2_All	17.35	34.14	21.78	44.23	55.86	36.54	61.84	47.48	63.32	15.11	13.51	36.84	0.907132	1.48974e-105	1.25884	6.67436e-227	-0.13723	0.00184117	0.351708	7.90227e-26	-1.04436	5.07203e-134	-1.39607	3.89242e-267
CL7088.Contig3_All	19.11	35.18	9.81	46.3	45.46	39.91	45.9	47.64	55.12	18	21.64	41.63	1.04496	6.35647e-133	1.23503	7.27305e-197	0.364486	1.34601e-14	0.190074	1.91868e-08	-0.680471	1.31309e-65	-0.870545	2.66932e-112
CL7088.Contig4_All	20.82	40.64	21.34	49.89	45.96	38.81	75.67	65.34	64.61	21.47	23.94	39.48	0.704844	2.74393e-180	1.32098	0	0.0453236	0.0272226	0.61614	2.41198e-216	-0.65952	9.74958e-162	-1.27566	0
CL7093.Contig10_All	33.99	21.85	31.44	15.77	15.11	19.35	9.33	14.12	17.75	15.66	33	23.66	-0.794429	3.58665e-171	-1.07327	1.12992e-281	-0.265212	9.98763e-25	-0.278845	3.835e-16	0.529217	4.28568e-71	0.808062	3.5346e-147
CL7103.Contig1_All	24.52	66.62	29.02	88.77	80.06	86.4	90.47	102.8	108.16	13.92	11.43	31.27	1.09043	0	1.3389	0	-1.07273	1.10599e-255	0.248473	4.06602e-47	-2.16315	0	-2.41163	0
CL7131.Contig13_All	17.34	28.01	14.18	7.36	7.15	10.46	3.81	6.51	7.37	13.35	24.65	22.4	-1.25166	0	-1.74243	0	0.0246481	0.0694356	-0.490767	4.4284e-38	1.27631	0	1.76708	0
CL7131.Contig5_All	23.02	15.51	23.22	4	2.97	3.54	2.97	5.12	4.37	12.13	22.9	25.69	-2.55152	0	-2.29943	0	-0.0187577	0.112098	0.25209	8.3818e-06	2.53276	0	2.28067	0
CL7164.Contig2_All	30.16	54.69	29.68	61.61	64.29	54.22	37.98	70.06	62.76	12.9	19.15	39.26	0.655733	8.15449e-260	0.587595	1.87966e-203	-0.674366	7.08713e-175	-0.0681387	3.50548e-05	-1.3301	0	-1.26196	0
CL7190.Contig2_All	11.54	11.93	9.95	15.46	20.47	17.05	12.34	14.1	16.06	5.01	6.6	7.47	0.668988	2.65438e-41	0.361603	3.63128e-12	-0.796079	9.22375e-36	-0.307385	3.11454e-11	-1.46507	1.14101e-146	-1.15768	1.23061e-82
CL7191.Contig7_All	13.03	17.77	7.07	10.94	31.61	29.61	6.92	16.84	16.67	7.98	7.11	9.07	0.931349	9.57567e-145	0.107683	0.00391239	-0.639526	3.11902e-41	-0.823666	3.16181e-117	-1.57088	0	-0.747209	2.44083e-57
CL7192.Contig1_All	19.44	16.51	8.63	16.01	24.11	15.84	4.55	16.62	12.76	5.31	8.53	10.39	0.331168	5.23633e-16	-0.376133	4.39826e-16	-0.868711	1.53869e-66	-0.707301	3.47504e-58	-1.19988	1.78255e-140	-0.492578	4.64228e-20
CL7196.Contig10_All	9.53	14.97	7.45	15.71	10.51	11.4	8.24	20.71	23.86	7.03	2.97	8.63	0.238382	8.48959e-25	0.732649	1.6223e-258	-0.773722	3.51059e-173	0.494267	2.21726e-128	-1.0121	0	-1.50637	0
CL7230.Contig10_All	24.26	25.7	21.92	10.61	23.49	20.05	10.06	13.49	10.88	13.9	27.75	24.09	-0.40773	1.4409e-45	-1.05219	3.03442e-234	-0.122877	2.7531e-06	-0.644462	2.68525e-77	0.284853	9.00679e-23	0.929315	2.11156e-176
CL7252.Contig9_All	49.87	34.58	33.83	36.06	29.28	27.77	8.06	15.16	27.71	7.78	19.16	9.46	-0.339691	6.67314e-25	-1.20035	6.40579e-215	-1.68934	0	-0.860656	6.09377e-99	-1.34965	5.00917e-206	-0.48899	1.14854e-21
CL726.Contig2_All	11.53	8.17	12.27	6.22	4.48	11.1	16.08	18.93	15.01	4.1	8.53	5.02	-0.550386	3.72016e-30	0.656106	9.43269e-63	-0.851218	2.78718e-63	1.20649	7.77954e-172	-0.300832	1.84059e-08	-1.50732	1.23938e-242
CL7264.Contig4_All	34.79	9.96	23.44	6.75	3.46	9.34	2.85	3.38	3.9	13.91	44.05	25.9	-1.79939	0	-2.74276	0	0.304377	9.25449e-30	-0.943367	4.21816e-51	2.10377	0	3.04714	0
CL7274.Contig5_All	14.18	17.28	11.88	19.24	17.7	12.64	19.94	19.2	19.24	7.06	9.59	10.59	0.198361	2.26303e-07	0.440311	1.83038e-31	-0.66143	5.77432e-48	0.241951	2.12042e-11	-0.859791	1.60558e-85	-1.10174	3.98204e-150
CL7289.Contig8_All	4.18	8.22	6.68	12.19	9.41	3.93	15.42	12.2	15.61	8.1	10.69	13.6	0.422948	1.05114e-22	1.18407	4.34629e-214	0.768869	4.70921e-80	0.761124	4.20838e-103	0.34592	1.65717e-20	-0.415203	4.32262e-36
CL729.Contig11_All	51.21	22.94	68.58	6.64	15.27	10.64	6.9	6.17	9.84	26.35	21.65	20.23	-2.13023	0	-2.63001	0	-1.05704	0	-0.499778	2.92186e-22	1.0732	2.10176e-166	1.57298	1.35496e-297
CL7290.Contig5_All	100.62	172.43	91.98	20.14	27.31	40	37.67	19.62	18.77	37.62	64.22	63.61	-2.06027	0	-2.25875	0	-1.13557	0	-0.198477	9.6911e-16	0.924702	0	1.12318	0
CL7306.Contig8_All	14	13.92	16.91	19.14	12.58	10.89	10.09	15.31	12.09	4.39	7.3	8.86	-0.0690776	0.0173142	-0.246291	1.84932e-11	-1.11773	7.18869e-150	-0.177213	1.14633e-06	-1.04865	2.61935e-129	-0.871435	4.30858e-84
CL7308.Contig1_All	20.38	10.41	13.34	7.57	20.8	25.33	3.03	13.56	10.2	1.48	4.07	4.14	0.283885	3.37992e-20	-0.705209	6.31159e-82	-2.17958	0	-0.989094	1.89956e-175	-2.46346	0	-1.47437	3.15071e-167
CL7317.Contig11_All	17.31	10.81	26.53	20.86	6.43	9.91	17.73	19.4	27.9	27.55	53.84	53.07	-0.548506	1.53512e-32	0.264295	3.01504e-11	1.31115	0	0.812801	2.63486e-75	1.85966	0	1.04686	6.60495e-236
CL7317.Contig13_All	49.66	27.03	56.26	25.37	13.92	23.01	14.88	30.25	27.53	35.49	58.89	48.25	-1.08988	0	-0.859029	2.09675e-253	0.108455	1.51417e-07	0.23085	2.94209e-14	1.19833	0	0.967485	0
CL7317.Contig14_All	37.34	25.38	43.74	18.14	13.56	19.59	12.87	24.01	20.99	35.96	51.14	43.84	-1.04974	1.9208e-253	-0.866039	1.06139e-183	0.306521	2.00678e-36	0.183698	1.72146e-07	1.35626	0	1.17256	0
CL7317.Contig2_All	35.89	21.08	47.76	23.94	7.82	13.44	6.69	17.86	22.85	34.48	58.79	26.41	-1.20692	0	-1.13143	7.35419e-306	0.197706	9.15369e-17	0.0754915	0.0141806	1.40463	0	1.32914	0
CL7355.Contig13_All	20.02	19.87	14.95	32.68	39.79	28.56	22.7	31.34	35.28	5.86	8.31	6.25	0.885446	1.41037e-145	0.717188	1.7607e-90	-1.41618	1.82502e-168	-0.168258	1.9168e-08	-2.30163	0	-2.13337	0
CL7355.Contig16_All	14.96	15.19	12.87	19.28	20.02	19.02	10.5	19.7	18.88	5.67	10.48	9.18	0.442856	2.80092e-27	0.204715	8.6907e-07	-0.754068	6.68993e-51	-0.238141	1.09837e-09	-1.19692	4.54723e-146	-0.958783	1.56059e-86
CL7379.Contig1_All	9.13	12.7	8.72	15.41	16.02	20.34	12.24	11.36	16.39	3.96	8.19	10.12	0.766838	1.34315e-34	0.407734	5.61594e-10	-0.435517	6.5272e-09	-0.359104	4.58896e-10	-1.20236	7.69304e-72	-0.843252	5.16972e-32
CL738.Contig1_All	59.59	104.8	127.06	130.5	56.02	52.03	214.3	79.91	138.48	171.97	261.08	267.17	-0.282231	3.23298e-47	0.579914	1.31679e-259	1.27691	0	0.862145	0	1.55914	0	0.696991	0
CL738.Contig17_All	71.66	32.18	76.62	25.5	22.74	28.7	14.43	39.91	26.62	32.69	48.45	31.34	-1.22715	0	-1.14194	0	-0.676855	3.443e-265	0.0852063	0.00046974	0.550296	7.73522e-116	0.465089	3.79268e-85
CL738.Contig27_All	231.55	84.28	228.54	79.12	60.69	96.9	30.87	129.12	83.92	87.44	116.31	78.27	-1.19844	0	-1.14207	0	-0.943029	0	0.0563658	0.00011307	0.25541	1.33417e-66	0.199045	1.32521e-41
CL738.Contig39_All	104.98	52.64	134.23	66.8	42.64	47.14	79.1	76.33	72.47	62.19	153.8	100.95	-0.894779	0	-0.349258	7.06761e-141	0.123916	9.76044e-23	0.54552	2.65781e-250	1.01869	0	0.473174	9.96504e-270
CL7415.Contig5_All	36.84	19.36	39.12	7.99	3.5	5.38	10.72	8.74	18.13	44.47	31.97	39.46	-2.49108	0	-1.32711	5.64557e-181	0.296028	1.03687e-17	1.16398	8.84343e-60	2.78711	0	1.62313	2.29976e-300
CL742.Contig2_All	52.74	18.95	50.02	36.17	17.24	23.46	95	44.4	38.01	31.61	63.9	82.43	-0.656632	9.99762e-82	0.557603	2.56023e-89	0.563936	2.12672e-92	1.21423	0	1.22057	0	0.00633332	0.191191
CL7420.Contig2_All	24.97	49.53	30.86	66.65	39.99	49.64	94.98	70.95	55.52	33.94	69.68	79.77	0.573936	2.5771e-92	1.08548	0	0.812887	2.53907e-200	0.511542	5.30915e-106	0.238951	4.18539e-23	-0.272591	3.08368e-34
CL7427.Contig2_All	21.74	32.41	31.89	5.35	7.29	15.32	9.6	6.33	5.81	10.2	32.61	19.04	-1.6191	4.54158e-288	-1.97187	0	-0.465753	2.01535e-37	-0.352765	1.20813e-08	1.15335	2.32081e-126	1.50611	1.35764e-188
CL7427.Contig3_All	75.49	80.74	68.17	28.07	34.76	37.13	33.33	24.16	25.8	28.5	47.45	50.02	-1.16279	0	-1.4172	0	-0.820878	3.1067e-255	-0.254411	6.49443e-15	0.341911	1.49119e-31	0.596323	2.77535e-83
CL7460.Contig1_All	75.21	65.76	83.45	63.19	46.17	55.62	25.61	43.48	38.41	33.08	58.11	46.65	-0.440357	2.6974e-134	-1.04991	0	-0.696366	6.00299e-307	-0.609552	2.28519e-177	-0.256009	1.4577e-37	0.353542	3.05108e-56
CL7460.Contig4_All	25.5	21.84	32.4	36.3	29.95	32.22	8.44	21.27	18.7	11.91	14.49	13.67	0.307343	7.1453e-35	-0.70748	1.32225e-124	-0.986657	1.08087e-220	-1.01482	1.38655e-282	-1.294	0	-0.279177	1.53396e-15
CL7475.Contig1_All	11.05	9.38	9.85	25.35	27.43	23.37	11.83	21.55	21.14	6.08	9.07	9.15	1.33734	2.63687e-129	0.870662	1.2415e-47	-0.299997	1.60804e-05	-0.466678	1.02481e-22	-1.63734	2.33109e-175	-1.17066	7.36807e-77
CL7485.Contig4_All	10.83	11.95	4.42	10.23	18.11	15.52	5.83	12.95	11.63	4.24	6.01	8.65	0.691395	4.02778e-52	0.175277	0.000189361	-0.515542	1.89962e-20	-0.516118	1.85302e-31	-1.20694	4.09843e-131	-0.690818	4.68245e-37
CL7497.Contig1_All	14.24	16.03	15.14	32.49	29.72	19.33	29.25	22.63	23.65	7.33	12.22	19.99	0.851794	2.29382e-70	0.752926	2.05817e-53	-0.179631	0.000577056	-0.0988685	0.00667223	-1.03142	3.66629e-97	-0.932556	1.36504e-76
CL751.Contig7_All	22.29	28.15	23.07	13.21	20.69	25.06	8.02	15.32	6.61	2.43	7.96	6.44	-0.317442	1.33713e-38	-1.28335	0	-2.12158	0	-0.965907	4.35348e-219	-1.80414	0	-0.838236	6.05815e-90
CL751.Contig9_All	18.28	27.85	19.62	17.6	15.84	24.33	9.05	24.86	10.91	3.99	9.74	6.89	-0.184917	9.32551e-14	-0.539465	3.72855e-91	-1.66882	0	-0.354548	6.16004e-38	-1.48391	0	-1.12936	1.26226e-222
CL7511.Contig8_All	68.04	37.11	92.9	57.38	19.36	32.82	62.36	49.08	56.7	68.25	129.27	123.98	-0.847826	2.951e-244	-0.223544	1.10993e-22	0.71092	3.77787e-296	0.624282	9.35962e-123	1.55875	0	0.934464	0
CL7520.Contig4_All	33.02	53.5	15.48	30.11	24.82	31.79	8.6	24.98	19.9	5.3	16.97	16.81	-0.231131	1.53916e-20	-0.917588	1.93701e-233	-1.37646	0	-0.686457	3.69884e-121	-1.14533	1.07156e-288	-0.458873	5.6934e-38
CL7528.Contig2_All	24.29	37.1	20.09	57.09	41.94	48.69	23.61	41.17	37.92	8.23	19.91	31.93	0.863009	8.02482e-184	0.350142	7.97749e-27	-0.424949	2.56166e-30	-0.512867	5.8976e-74	-1.28796	0	-0.775091	4.64773e-108
CL7547.Contig4_All	24.81	23.61	22.57	11.74	8.23	10.78	9.19	12.12	6.49	17.57	25.86	22.07	-1.20303	5.32403e-223	-1.33948	1.50425e-262	-0.108476	0.000176885	-0.136449	0.00161113	1.09455	2.08961e-179	1.231	6.3623e-215
CL7559.Contig6_All	44.27	12.77	49.82	18.96	12.04	14.68	20.2	29.76	39.45	65.06	77.23	56.26	-1.22139	5.53464e-298	-0.245041	1.71834e-18	0.901611	0	0.976346	1.09074e-174	2.123	0	1.14665	0
CL7559.Contig8_All	30.63	19.99	32.49	17.95	10.96	8.19	35.97	30.58	41.41	55.87	103.07	48.58	-1.15855	5.58997e-274	0.38512	5.83115e-53	1.32524	0	1.54367	0	2.48378	0	0.940118	0
CL7560.Contig2_All	21.73	26.96	22.1	68.23	38.3	31.32	27.14	30.03	36.22	11.37	24.77	18.72	0.967561	4.39341e-192	0.414343	1.57043e-30	-0.355936	2.71362e-18	-0.553218	3.43253e-73	-1.3235	0	-0.770279	5.97967e-90
CL7573.Contig1_All	60.15	59.27	18.52	14.78	41.28	28.62	16.06	18.71	23.62	7.4	12.21	24.11	-0.699618	1.59686e-86	-1.22253	4.77275e-217	-1.63816	0	-0.522913	1.21758e-32	-0.938542	4.5328e-89	-0.41563	4.69752e-16
CL761.Contig10_All	7.33	14.64	13.97	5.44	3.16	2.54	1.43	3.15	2.56	21.98	43.95	39.88	-1.68607	7.27298e-199	-2.318	3.86317e-300	1.56536	0	-0.631925	3.66083e-14	3.25143	0	3.88336	0
CL761.Contig11_All	10.72	7.11	13.55	9.92	5.49	7.2	4.81	8.05	8.18	10.36	24.48	20.72	-0.468481	5.30987e-23	-0.565246	1.61507e-31	0.83135	4.95376e-107	-0.0967645	0.0208539	1.29983	1.12425e-220	1.3966	6.25326e-245
CL7619.Contig2_All	206.75	355.1	177.37	155.36	122.85	124.51	117.96	171.04	153.96	54.13	98.09	135.56	-0.872307	0	-0.72565	0	-1.34997	0	0.146657	5.47481e-27	-0.477663	1.68302e-219	-0.62432	0
CL7619.Contig4_All	63.95	86.43	61.71	93.95	77.51	73.9	82.54	98.01	98.72	23.18	33.51	39.99	0.214232	3.96953e-31	0.408987	1.12618e-115	-1.12342	0	0.194755	1.41319e-29	-1.33765	0	-1.5324	0
CL762.Contig11_All	5.83	15.22	13.02	10.47	11.46	4.76	6.96	8.84	8.29	9.31	28.42	40.9	-0.3499	1.35283e-18	-0.491411	3.53561e-33	1.21409	0	-0.141511	0.00046572	1.56399	0	1.7055	0
CL762.Contig5_All	18.57	18.44	14.96	13.68	5.01	9.98	3.16	10.73	6.61	14.52	24.68	25.52	-0.853235	4.07137e-110	-1.32585	3.1508e-223	0.324168	1.41834e-25	-0.472613	1.03433e-22	1.1774	2.97595e-234	1.65002	0
CL7650.Contig1_All	30.4	43.16	33.15	26.96	13.62	13.96	17.37	11.36	15.76	25	50.33	54.37	-0.961291	2.43174e-112	-1.24531	1.9943e-169	0.299153	1.35809e-18	-0.284021	4.69265e-08	1.26044	3.71084e-214	1.54446	2.45575e-289
CL7653.Contig21_All	15.6	23.03	25.81	16.07	13.5	12.85	20.45	18.91	25.23	30.29	49.69	66.75	-0.599178	9.25296e-52	0.0139694	0.189921	1.19836	0	0.613148	4.42551e-54	1.79754	0	1.18439	0
CL7653.Contig26_All	35.81	32.89	38.08	37.86	26.74	28.57	55.88	34.83	33.84	62.9	189.17	189.4	-0.186656	3.59214e-05	0.25285	5.17962e-09	2.07732	0	0.439506	3.60398e-22	2.26397	0	1.82447	0
CL7653.Contig6_All	52.63	54.44	59.98	48.66	34.88	32.92	74	53.69	56.13	79.63	126.81	185.78	-0.515855	2.6266e-106	0.147753	1.38124e-12	1.24262	0	0.663608	5.61633e-183	1.75847	0	1.09487	0
CL7656.Contig1_All	15.29	32.19	19.47	44	34.96	29.9	61.61	48.42	51.17	12.11	15.43	34.73	0.706435	3.58893e-99	1.28029	0	-0.0895095	0.00581061	0.573854	2.06961e-101	-0.795945	1.15637e-122	-1.3698	0
CL7656.Contig2_All	32.6	65.18	35.87	69.86	61.29	52.92	116.86	85.2	92.57	33.46	46.34	87.52	0.465786	5.99099e-94	1.15037	0	0.336491	3.74689e-48	0.684584	3.58501e-297	-0.129294	3.61697e-10	-0.813878	0
CL7688.Contig1_All	13.04	24.85	8.93	10.01	30.83	20.57	45.71	29.67	34.28	9.05	10.45	12.63	0.395387	4.98598e-17	1.24256	2.41685e-202	-0.529549	8.33684e-22	0.847172	1.90754e-108	-0.924937	1.05096e-71	-1.77211	0
CL7688.Contig5_All	8.37	16.11	11.85	27.23	21.63	14.83	37.2	26.04	27.9	8.89	17.41	32.3	0.813088	5.73524e-137	1.33234	0	0.698463	2.83727e-98	0.519253	8.57405e-89	-0.114625	1.63112e-05	-0.633877	2.53955e-127
CL7709.Contig1_All	28.88	35.88	22.03	28.57	42.87	38.43	21.36	30.51	26.09	10.69	14.54	24.7	0.343515	7.31389e-29	-0.139779	1.49545e-05	-0.784503	8.89187e-98	-0.483294	1.70299e-52	-1.12802	1.74901e-225	-0.644725	2.67839e-63
CL7709.Contig4_All	21.95	28.68	17.72	22.7	53.74	38.72	16.66	27.91	23.7	13.02	18.23	18.08	0.753812	3.32399e-181	0.0101962	0.198663	-0.462982	1.55671e-46	-0.743616	4.15343e-176	-1.21679	0	-0.473178	1.9161e-48
CL7727.Contig1_All	17.32	28.02	20.81	42.9	33.21	27.83	40.38	44.95	48.78	16.92	17.86	26.01	0.657776	1.05461e-71	1.03555	9.2748e-199	-0.107664	0.00313054	0.377776	1.1726e-34	-0.76544	7.18282e-94	-1.14322	3.14443e-234
CL7741.Contig3_All	24.18	40.45	19.27	39.39	41.7	38.69	21.99	47.3	47.32	8.95	11.77	24.15	0.517397	3.40563e-70	0.489758	2.60294e-62	-0.889501	9.69059e-127	-0.0276392	0.0856384	-1.4069	0	-1.37926	0
CL7741.Contig5_All	38.25	58.32	36.07	81.06	42.66	43.79	65.93	93.03	103.28	20.4	29.09	49.53	0.341813	1.04533e-49	0.995842	0	-0.409962	2.67429e-55	0.654029	2.21293e-248	-0.751775	2.64241e-204	-1.4058	0
CL777.Contig1_All	20.12	13.47	22.53	7.03	9	5.02	2.9	8.43	7.66	8.21	16.41	21.93	-1.40997	5.65354e-157	-1.54534	4.15556e-179	-0.256206	1.3616e-09	-0.135377	0.0163027	1.15376	9.59969e-98	1.28914	2.9354e-115
CL7771.Contig2_All	16.43	21.74	19.96	22.39	18.82	12.78	12.08	16.8	21.14	23.46	35.79	42.74	-0.101057	0.00633771	-0.201754	1.93219e-06	0.824178	1.51475e-113	-0.100697	0.00805348	0.925235	5.0555e-138	1.02593	1.45326e-162
CL7772.Contig1_All	8.21	8.32	6.03	11.39	17.79	15.12	17.61	12.4	10.05	2.89	4.69	6.51	0.973933	1.19134e-183	0.832397	7.69843e-128	-0.672755	3.35644e-51	-0.141536	6.59448e-07	-1.64669	0	-1.50515	0
CL7772.Contig11_All	6.25	11.82	4.77	18.06	19.82	12.49	36.64	27.85	23.55	4.49	7.41	8.14	1.14328	2.43419e-254	1.95164	0	-0.183177	5.51733e-06	0.808363	6.9836e-249	-1.32646	0	-2.13482	0
CL7786.Contig4_All	20.22	15.25	6.49	7.29	27.91	20.6	11.07	45.58	39.14	9.08	12.44	8.85	0.412515	2.48737e-30	1.20618	0	-0.459839	3.00694e-28	0.793664	2.90505e-161	-0.872354	1.9458e-111	-1.66602	0
CL7786.Contig5_All	19.88	23.11	17.86	10.07	2.76	6.84	6.79	20.13	14.01	13.98	16.52	11.54	-1.62403	0	-0.556756	1.03752e-55	-0.527263	3.50803e-51	1.06728	2.13483e-114	1.09677	1.3677e-123	0.029493	0.113981
CL7808.Contig2_All	9.49	5.8	6.28	17.09	18.28	11.47	9.84	11.98	17.23	4.16	5.64	5.79	1.12456	2.24931e-72	0.872787	1.17777e-40	-0.453713	1.37719e-08	-0.25177	1.43553e-06	-1.57827	1.29693e-121	-1.3265	7.19015e-79
CL7815.Contig4_All	7.42	7.96	8.92	14.15	11.03	16.05	31.94	14.01	29.94	6.42	5.95	8.73	0.765419	7.89737e-63	1.64751	0	-0.195077	0.000106007	0.882088	1.4864e-144	-0.960496	1.74556e-92	-1.84258	0
CL7818.Contig5_All	63.42	80.7	33.51	48.47	77.36	64.61	24.21	30.11	44.35	15.18	30.39	42.43	0.102223	1.009e-09	-0.840015	0	-1.00498	0	-0.942238	0	-1.10721	0	-0.164968	2.31686e-12
CL782.Contig3_All	34.32	38.63	74.02	34.04	18.37	22.07	91.58	33.34	71.69	48.59	149.29	125.2	-0.977913	0	0.417855	6.78624e-225	1.139	0	1.39577	0	2.11691	0	0.721146	0
CL7824.Contig1_All	16.55	21.8	11.39	62.52	83.16	90.65	12.89	32.72	36.99	5.18	4.91	4.13	2.24957	0	0.741291	7.63922e-223	-1.80199	0	-1.50828	0	-4.05155	0	-2.54328	0
CL7845.Contig2_All	26.59	21.45	34.86	10.37	6.28	6.66	6.3	9.26	9.06	12.79	19.48	20.37	-1.82829	0	-1.74613	0	-0.652726	9.4975e-303	0.0821605	0.00189344	1.17556	0	1.0934	0
CL7845.Contig4_All	47.56	36.97	64.02	53.97	29.69	28.29	60.16	44.08	54.81	50.27	95.23	95.65	-0.403308	8.79105e-68	0.106977	2.51272e-07	0.707766	1.92973e-302	0.510285	7.47588e-111	1.11107	0	0.600789	1.17565e-225
CL786.Contig14_All	10.95	21.64	9.33	32.89	20.57	19.41	14.44	22.49	20.5	4.28	7.27	14.45	0.801784	1.67288e-109	0.466329	3.74199e-34	-0.677463	3.22762e-48	-0.335455	7.10308e-24	-1.47925	1.01242e-293	-1.14379	2.04787e-156
CL786.Contig4_All	15.86	22.71	16.2	40.84	26.99	23.66	25.62	29.13	25.84	6.88	15.55	21.25	0.744978	1.5348e-114	0.569264	1.53063e-63	-0.315236	5.50798e-16	-0.175714	1.99167e-09	-1.06021	5.13083e-208	-0.8845	3.97719e-136
CL7873.Contig1_All	13.46	17.89	17.83	34.07	29.37	20.91	28.61	37.97	28.13	7.57	22.21	16.52	0.782515	1.15593e-117	0.958391	5.46021e-186	-0.0788294	0.0127974	0.175876	6.03615e-10	-0.861345	1.63657e-139	-1.03722	8.6276e-213
CL7884.Contig1_All	16.87	20.84	16.92	66.99	45.07	44.71	82.36	69.62	84.79	5.39	4.65	6.75	1.52551	0	2.12654	0	-1.69118	8.19392e-229	0.601038	1.78227e-182	-3.21668	0	-3.81772	0
CL7907.Contig133_All	12.46	26.32	10	26.17	9.48	14.57	7.96	22.35	12.81	24.77	46.76	27.66	0.0469089	0.0645422	-0.161184	2.58314e-05	1.03067	1.12239e-222	-0.208093	8.37524e-08	0.983764	1.5778e-206	1.19186	5.2964e-280
CL7907.Contig94_All	67.28	34.43	79.65	68.52	31.56	67.04	61.78	86.12	98.31	23.62	40.88	32.02	-0.114124	2.59546e-10	0.451081	2.5325e-162	-0.903462	0	0.565205	1.04787e-243	-0.789338	3.36825e-300	-1.35454	0
CL7907.Contig95_All	51.81	34.33	57.5	55.95	28.67	41.24	45.97	68.77	49.27	9.68	7.61	17.1	-0.186389	7.61479e-19	0.203301	6.62388e-25	-2.05276	0	0.38969	4.30588e-81	-1.86638	0	-2.25607	0
CL7915.Contig6_All	21.44	23.36	17.58	27.11	38.59	36.5	18.97	38.98	33.46	8.48	19.93	17.61	0.712783	0	0.559667	2.96582e-223	-0.435789	8.99079e-98	-0.153116	5.34083e-23	-1.14857	0	-0.995455	0
CL7924.Contig1_All	131.72	62.8	59.79	53.74	62.83	50.78	32.94	37.15	76.24	93.64	137.06	202.96	-0.597398	1.89128e-99	-0.778479	4.46794e-157	0.790828	1.77739e-280	-0.181081	1.22349e-08	1.38823	0	1.56931	0
CL7941.Contig2_All	315.47	458.79	153.25	94.87	183.18	178.26	19.04	46.03	76.72	49.53	88.33	96.88	-1.02058	0	-2.69577	0	-1.97027	0	-1.67519	0	-0.949682	0	0.725505	7.15725e-220
CL7976.Contig2_All	16.39	12.28	15.93	26.43	25.4	23.3	24.89	26.59	20.95	2.63	8	6.74	0.75475	2.39204e-172	0.70721	1.3249e-148	-1.35582	2.88613e-268	-0.0475399	0.0152637	-2.11057	0	-2.06303	0
CL7976.Contig3_All	11.81	8.93	10.61	17.05	17.38	18.22	14.63	22.08	28.46	1.95	5.13	6.56	0.750333	4.6032e-120	1.06383	3.95317e-266	-1.194	2.06561e-155	0.3135	1.63684e-31	-1.94433	0	-2.25783	0
CL7978.Contig1_All	20.16	11.76	14.64	10.64	30.3	26.57	5.64	10.54	7.93	4.73	6.83	4.43	0.538518	9.59627e-40	-0.932883	6.29648e-70	-1.53272	1.28914e-152	-1.4714	8.89584e-206	-2.07124	0	-0.599836	1.5751e-18
CL7978.Contig4_All	39.32	34.57	25.08	17.21	79.59	63.24	5.6	18.06	8.97	6.86	14.34	10.79	0.695583	7.85083e-144	-1.58041	0	-1.61891	0	-2.27599	0	-2.31449	0	-0.0384956	0.119895
CL7987.Contig5_All	10.61	13.57	8.58	18.99	15.5	13.9	13.48	16.69	15.15	3.16	7.93	9.22	0.569136	3.46682e-22	0.488273	2.38936e-16	-0.67127	1.90335e-20	-0.0808628	0.0410793	-1.24041	3.59446e-79	-1.15954	5.11107e-67
CL7987.Contig6_All	13.48	21.83	13.27	36.55	25.73	28.37	25.97	28.45	30.66	5.75	13.85	18.26	0.905947	4.21974e-90	0.82717	3.3325e-73	-0.341015	4.44272e-10	-0.0787775	0.0143167	-1.24696	1.22832e-151	-1.16818	5.26553e-129
CL8.Contig9_All	22.4	30.94	31.76	38.57	34.87	33.93	35.06	47.17	44.23	15.88	19.15	21.76	0.336868	4.76626e-88	0.577685	7.69194e-277	-0.579942	4.93597e-189	0.240818	2.32777e-55	-0.91681	0	-1.15763	0
CL8022.Contig9_All	11.17	13.45	8.35	11.6	21.4	20.82	5.77	9.15	13.42	3.55	7.85	6.67	0.708715	6.04402e-78	-0.208833	1.36764e-06	-0.860976	1.71236e-67	-0.917548	6.48014e-120	-1.56969	5.99788e-281	-0.652143	9.78085e-37
CL803.Contig15_All	36.42	37.17	50.78	42.63	25.21	27.44	91.16	68.7	64.62	63.72	97.83	108.16	-0.380678	6.56383e-64	0.858804	0	1.12378	0	1.23948	0	1.50446	0	0.264973	3.21177e-70
CL803.Contig16_All	19.14	18.51	31.61	21.88	13.4	14.63	27.72	36.31	36.55	37.61	53	50.48	-0.468739	1.12786e-50	0.548368	1.21463e-96	1.03342	0	1.01711	6.9709e-279	1.50216	0	0.485056	1.5861e-108
CL8035.Contig2_All	26.48	35.01	19.91	5.09	7.18	6.21	3.54	6.19	6.18	9.57	11.88	16.07	-2.13645	0	-2.34396	0	-1.10925	1.0455e-254	-0.207518	0.000171941	1.0272	1.69798e-105	1.23472	2.92766e-140
CL8044.Contig10_All	47.16	52.96	66.83	19.04	9.46	12.85	21.39	12.01	10.66	37.46	66.56	86.16	-2.0094	0	-1.91579	0	0.196593	1.45493e-26	0.093605	0.00484063	2.20599	0	2.11238	0
CL8044.Contig7_All	31.45	22.99	36.78	8.86	3.87	8.52	9.4	10.79	11.15	28.26	55.67	55.06	-2.09783	0	-1.53187	0	0.614811	7.8894e-162	0.56596	1.32042e-32	2.71264	0	2.14668	0
CL8044.Contig9_All	7.43	6.79	7.87	2.96	1.25	2.82	5.36	5.56	5.02	16.28	40.92	30.78	-1.65084	1.20762e-156	-0.463202	3.59998e-20	1.99891	0	1.18764	1.15018e-69	3.64975	0	2.46211	0
CL8073.Contig2_All	23.63	37.51	20.7	67.14	44.07	44.91	47.3	49.93	46.98	11.41	23.33	39.32	0.938384	3.94148e-158	0.83688	1.94737e-121	-0.123705	0.00106259	-0.101504	0.000339876	-1.06209	4.70127e-195	-0.960585	1.34969e-153
CL8073.Contig6_All	19.82	28.84	20.04	55.72	38.86	45.44	21.43	36.67	31.43	7.94	14.77	22.81	1.03448	1.72305e-141	0.40663	3.86209e-19	-0.570621	1.97699e-26	-0.627845	1.03673e-60	-1.6051	1.15989e-279	-0.977251	2.99492e-84
CL8076.Contig2_All	19.83	11.91	24.17	11.63	5.91	10.54	6.4	12.89	11.32	14.16	25.86	21.59	-0.990661	1.48627e-196	-0.858513	2.14439e-154	0.144832	4.24091e-08	0.132148	0.000251211	1.13549	1.26444e-272	1.00334	4.16284e-222
CL8097.Contig2_All	15.98	19.44	12.52	19.42	41.49	26.04	7.25	11.57	19.91	5.69	14.35	7.3	0.861239	2.15543e-144	-0.297004	3.82508e-13	-0.803549	5.54795e-72	-1.15824	2.08363e-233	-1.66479	0	-0.506545	6.54186e-27
CL8098.Contig4_All	12.89	13.39	10.38	11.53	21.21	14.07	6.42	11.12	10.55	3.53	5.33	5.97	0.353991	1.66059e-27	-0.374479	4.44067e-24	-1.29842	7.85367e-198	-0.72847	9.06666e-97	-1.65241	0	-0.923937	1.31422e-88
CL8100.Contig2_All	12.29	12.11	11.16	16.44	23.46	15.2	9.03	13.31	12.33	6.96	9.06	10.08	0.636918	8.4042e-37	-0.0188388	0.19989	-0.432513	4.03708e-13	-0.655757	1.8682e-38	-1.06943	1.58396e-87	-0.413674	5.04421e-12
CL8103.Contig1_All	19.6	21.58	16.9	43.4	40.81	35.95	33.16	39.08	32.83	8.3	17.29	14.27	1.05242	1.95666e-260	0.86752	4.83468e-166	-0.534454	1.36543e-40	-0.184898	1.48168e-12	-1.58687	0	-1.40197	0
CL8103.Contig2_All	10.09	9.78	10.81	17.77	19.37	25.62	4.11	13.94	9.27	1.81	4.72	2.06	1.03535	3.19284e-132	-0.150237	0.00154445	-1.8292	1.37369e-153	-1.18558	2.46494e-163	-2.86454	0	-1.67896	1.14325e-122
CL8112.Contig3_All	143.84	124.19	160.99	196.65	90.47	101.42	243.97	217.3	322.97	174.02	351.17	310.73	-0.136507	3.53835e-17	0.884194	0	0.975393	0	1.0207	0	1.1119	0	0.0911994	1.39261e-15
CL8116.Contig3_All	5.2	2.32	2.54	19.72	19.24	12.66	35.97	26.05	17.92	2.95	1.57	3.09	2.36709	2.30472e-211	3.00985	0	-0.38761	0.000538483	0.64276	2.09833e-45	-2.7547	1.35202e-251	-3.39746	0
CL8116.Contig4_All	689.31	469.29	885.01	1511.37	555.83	955.71	1245.18	1554.72	2051.4	568.65	661.74	781.34	0.571889	0	1.26567	0	-0.00661287	0.100815	0.693777	0	-0.578501	0	-1.27228	0
CL8116.Contig5_All	503.49	361.67	603.8	2505.75	1503.82	1558.36	2580.2	2515.79	2976.02	181.77	291.78	288.91	1.92958	0	2.47704	0	-0.929375	0	0.547459	0	-2.85896	0	-3.40642	0
CL8125.Contig7_All	5.3	10.84	8.89	19.93	17.05	11.32	24.73	16.36	13.1	10.08	18.06	18.64	0.953564	1.9513e-69	1.12728	7.06991e-102	0.914578	1.24792e-63	0.173714	4.37877e-05	-0.0389859	0.0652767	-0.212699	8.99825e-07
CL8132.Contig4_All	20.72	20.52	17.34	13.22	17.34	15.92	4.19	9.58	8.7	9.75	13.48	14.55	-0.330988	5.94479e-19	-1.36833	2.66517e-205	-0.623945	3.9592e-57	-1.03734	8.07185e-106	-0.292957	5.08912e-13	0.744388	1.40302e-50
CL8135.Contig9_All	8.32	10.25	9.39	17.79	10.65	6.7	32.14	17.73	20.35	18.22	30.07	34.1	0.334631	5.54187e-11	1.33728	7.40157e-208	1.56952	0	1.00265	1.42161e-131	1.23489	8.03496e-218	0.232242	1.21256e-12
CL8143.Contig2_All	20.72	12.77	26.9	14.7	9.56	10.68	13.03	15.06	16.88	18.3	37.4	35.13	-0.785998	3.17868e-167	-0.418527	6.80644e-55	0.593589	6.50309e-155	0.367471	6.39505e-33	1.37959	0	1.01212	0
CL815.Contig19_All	29.24	15.73	42.44	5.71	4.66	7.34	4.48	15.04	11.01	13.7	17.67	18.08	-2.29872	0	-1.49969	0	-0.811671	9.62571e-117	0.799032	6.52238e-41	1.48705	5.99236e-176	0.688017	9.90278e-51
CL815.Contig20_All	15.13	7.17	26.1	9.09	5.4	5.8	14.57	14.18	17.61	25.7	53.42	53.52	-1.24952	3.00404e-166	-0.0526048	0.0494359	1.46311	0	1.19692	3.42046e-149	2.71263	0	1.51572	0
CL815.Contig26_All	12.32	5.38	16.2	8.72	3.46	5.84	4.52	5.83	8.76	14.98	28.04	21.05	-0.906313	8.28949e-55	-0.814963	6.58268e-46	0.927418	2.86298e-107	0.0913502	0.0511348	1.83373	3.82586e-303	1.74238	2.46601e-281
CL8157.Contig2_All	14.34	11.41	15.4	6.54	10.31	12.04	5.78	8.5	5.31	5.9	17.77	11.94	-0.508504	1.05914e-29	-1.05706	4.65353e-101	-0.201462	8.93845e-07	-0.548554	3.3899e-24	0.307042	1.09928e-11	0.855596	8.8095e-63
CL816.Contig42_All	16.63	10.61	26.83	11.68	4.45	8.59	9.43	10.72	13.29	11.98	25.61	25.23	-1.12502	4.0126e-243	-0.687069	3.63093e-106	0.221518	6.32998e-17	0.437947	1.78941e-30	1.34653	0	0.908586	6.09815e-200
CL8160.Contig2_All	20.58	25.83	9.55	25.08	54.63	42.99	7.34	14.48	22.03	6.57	8.56	7	1.13488	1.08384e-305	-0.339632	4.26055e-18	-1.33028	1.78457e-180	-1.47451	0	-2.46516	0	-0.990648	1.65049e-89
CL8162.Contig7_All	65.06	120.05	75.37	111.59	105.56	82.28	219.25	159.11	149.13	108.73	118.05	214.41	0.206248	2.45371e-25	1.03237	0	0.775459	0	0.826126	0	0.569211	1.16059e-237	-0.256915	1.81351e-65
CL8195.Contig1_All	11.08	21.27	17.56	34.11	21.05	13.94	41.41	27.47	33.34	17.44	33.43	36.64	0.4755	1.44293e-30	1.0466	5.37728e-171	0.823222	1.34321e-99	0.571104	4.70189e-61	0.347723	9.54426e-23	-0.223382	3.46269e-12
CL8198.Contig3_All	17.55	16.37	13.21	22.8	29.72	26.31	16.22	15.39	26.85	5.79	12.58	11.51	0.743749	3.91916e-192	0.315838	2.59574e-31	-0.652705	1.05305e-92	-0.427911	1.11442e-71	-1.39645	0	-0.968543	3.69191e-224
CL8198.Contig5_All	21.91	17.06	15.74	23.75	32.24	31.93	11.13	16.95	28.39	5.37	10.89	10.78	0.685608	1.0488e-189	0.0524985	0.0152759	-1.01138	2.9879e-230	-0.63311	4.06923e-164	-1.69699	0	-1.06388	3.49076e-258
CL82.Contig10_All	73.06	59.4	66.55	29.44	23.13	22.65	15.54	29.11	22.7	34.11	47.35	43.35	-1.39872	0	-1.54618	0	-0.662105	1.13253e-159	-0.14746	2.68514e-05	0.73662	2.11071e-122	0.88408	8.22382e-166
CL82.Contig4_All	33.28	23.32	23.45	17.47	3.7	16.3	12.91	15.23	23.7	25.18	27.29	52.82	-1.09052	2.73967e-162	-0.614655	1.01385e-61	0.408596	5.32158e-40	0.475867	2.18391e-26	1.49912	0	1.02325	3.71646e-194
CL8200.Contig6_All	15.07	36.98	16.93	50.25	33.72	32.25	58.16	58.28	55.83	15.71	25.33	35.98	0.757248	5.32604e-140	1.3322	0	0.170417	1.23372e-07	0.574953	1.48025e-127	-0.586831	1.10014e-90	-1.16178	0
CL822.Contig36_All	15.62	10.96	15.48	12.8	10.05	10.87	6.52	10.41	8.89	10.18	29.07	15.82	-0.315822	1.56492e-22	-0.694771	2.54693e-89	0.392484	5.48647e-43	-0.378949	4.05035e-25	0.708306	4.73182e-122	1.08725	9.83641e-249
CL8255.Contig6_All	10.18	14.61	10.13	25.26	17	12.18	27.34	20.43	25.77	12.46	30.34	38.92	0.649062	1.14683e-25	1.096	7.14637e-81	1.24951	3.04656e-111	0.446938	2.86221e-18	0.600447	8.15672e-34	0.153509	0.00032916
CL828.Contig20_All	40.5	52.39	26.99	40.43	79.43	26.74	21	40.58	32.65	13.17	23.17	20.4	0.29178	5.34339e-54	-0.336275	2.16511e-57	-1.07354	0	-0.628055	4.68581e-216	-1.36532	0	-0.737267	5.68504e-187
CL8285.Contig1_All	16.83	14.55	15.82	26.53	29.73	24.58	17.74	19.11	21.97	4.84	13.56	11.54	0.780546	3.28625e-94	0.330566	5.69827e-16	-0.645459	1.10211e-40	-0.449981	4.48953e-36	-1.42601	3.46286e-250	-0.976025	7.49066e-101
CL8285.Contig2_All	16.34	13.93	14.45	29.09	27.82	25.66	22.05	22.36	27.96	6.69	13.93	11.99	0.889213	2.39856e-115	0.707309	4.90523e-69	-0.444376	6.80645e-20	-0.181904	7.36786e-08	-1.33359	2.47882e-222	-1.15169	2.00667e-155
CL8288.Contig2_All	23.81	15.11	22.54	7.83	7.14	17.83	5.38	8.92	7.79	5.31	7.79	5.61	-0.902513	5.43316e-83	-1.45939	2.4074e-176	-1.70591	8.3261e-223	-0.556872	2.2257e-20	-0.803394	5.15915e-38	-0.246522	0.000137912
CL8288.Contig3_All	30.3	53.76	37.12	13.73	16.19	25.64	25.69	15.43	17.17	13.96	38.26	27.83	-1.1235	0	-1.05053	0	-0.592363	9.35986e-139	0.0729698	0.00676628	0.531136	1.05246e-76	0.458166	1.66144e-58
CL8332.Contig16_All	36.95	33.99	51.13	53.07	21.01	31.69	85.92	57.59	69.81	65.17	116.56	101.75	-0.201445	2.64838e-14	0.815006	4.53255e-291	1.22503	0	1.01645	0	1.42647	0	0.410023	3.00591e-114
CL8332.Contig27_All	24.8	37.23	34.84	36.51	23.31	22.09	66.8	37.42	48.36	41.26	67.67	71.49	-0.237403	2.11384e-16	0.663309	1.41126e-156	0.906739	0	0.900712	2.56144e-264	1.14414	0	0.24343	1.49774e-30
CL8332.Contig3_All	34.82	41.45	46.34	35.8	20.83	27.92	42.18	45.47	43.65	52.13	85.43	73.63	-0.531198	6.0293e-72	0.11226	1.10131e-05	0.794748	4.77186e-252	0.643458	2.94254e-108	1.32595	0	0.682488	7.48394e-193
CL8332.Contig4_All	20.86	15.78	26.48	28.54	14.77	15.65	42.32	38.03	36.46	32.83	60.23	52.37	-0.0932094	0.00452237	0.899895	1.13921e-178	1.21414	0	0.993105	5.23355e-210	1.30735	0	0.314244	7.19841e-35
CL8347.Contig2_All	57.4	108.76	72.67	111.07	96.83	83.44	249.94	128.75	139.06	81.7	91.9	192.55	0.291645	4.48124e-50	1.12774	0	0.631514	4.65933e-258	0.836094	0	0.339869	3.29027e-84	-0.496225	9.95813e-235
CL8353.Contig1_All	85.94	65.99	89.83	160.2	156.42	113.5	267.36	271.24	292.33	110.51	37.96	60.01	0.836611	0	1.79617	0	-0.20349	2.6917e-21	0.959554	0	-1.0401	0	-1.99966	0
CL8353.Contig2_All	88.83	68.01	73.12	124.38	120.43	82.01	140.15	144.53	164.71	89.4	52.12	42.14	0.513433	2.07733e-126	0.983978	0	-0.313843	4.56689e-37	0.470546	2.96221e-148	-0.827275	5.58733e-294	-1.29782	0
CL8360.Contig2_All	17.25	19.64	15	9.47	13.88	11.5	4.99	7.52	8.87	6.02	13.51	13.94	-0.573591	5.13187e-77	-1.27128	3.16255e-291	-0.627488	9.61138e-91	-0.697689	4.83593e-73	-0.0538976	0.0204025	0.643792	8.30265e-62
CL8363.Contig3_All	12.48	17.47	5.6	27.04	7.7	20.28	5.2	20.35	14.62	2.97	7.97	3.92	0.635077	1.50893e-45	0.194509	2.76846e-05	-1.24998	1.53579e-90	-0.440569	3.15015e-24	-1.88506	1.93019e-253	-1.44449	5.4182e-128
CL8363.Contig5_All	35.34	51.95	35.83	88.72	74.77	79.09	28.16	41.75	56.68	11.46	18.12	32.13	0.982683	0	0.053503	0.0168992	-0.982571	8.41666e-202	-0.92918	0	-1.96525	0	-1.03607	2.0632e-227
CL8366.Contig2_All	29.91	45.05	28.42	76.53	57.91	59.15	32.83	58.78	55.79	12.37	25.91	39.86	0.910742	6.66512e-206	0.531128	1.94663e-62	-0.385791	2.03802e-25	-0.379614	3.46656e-44	-1.29653	0	-0.916919	9.74084e-161
CL8390.Contig16_All	17.39	25.89	19.63	44.32	19.91	21.59	21.22	31.46	30.33	7.18	12.36	12.89	0.455018	2.7304e-28	0.419079	6.33231e-24	-0.940188	6.29072e-72	-0.0359393	0.097034	-1.39521	9.90023e-183	-1.35927	1.75723e-170
CL8391.Contig4_All	53.89	78.69	74.42	115.74	70.88	61.31	178.31	128.41	138.21	85.02	88.23	96.48	0.265069	5.838e-48	1.11315	0	0.390556	4.00527e-107	0.84808	0	0.125487	4.43807e-14	-0.722592	0
CL8391.Contig8_All	20.6	22.41	17.61	32.52	18.66	24.94	47.09	35.02	39	25.63	18.42	22.32	0.332787	1.82382e-23	1.00774	1.06041e-251	0.139341	1.99885e-05	0.674957	2.72088e-127	-0.193446	7.4802e-10	-0.868402	1.72866e-197
CL841.Contig3_All	115.04	209.5	59.9	149.35	236.04	246.68	71.39	173.86	124.35	37.87	36.39	92.17	0.719427	0	-0.0414976	0.00117446	-1.19589	0	-0.760925	0	-1.91532	0	-1.15439	0
CL8410.Contig1_All	19.82	12.79	24.61	16.1	9.5	12.46	17.58	17.29	17.03	18.38	27.04	32.38	-0.583918	6.23935e-60	-0.131634	3.23175e-05	0.451451	6.21164e-52	0.452284	5.82943e-35	1.03537	4.28007e-217	0.583085	2.95033e-81
CL8425.Contig1_All	44.57	25.12	35.04	20.5	36.79	35.94	10.42	31.5	22.35	7.28	16.96	10.94	-0.165576	3.78737e-10	-0.688188	3.57107e-121	-1.56594	0	-0.522612	1.18967e-66	-1.40036	0	-0.877753	3.04632e-115
CL843.Contig1_All	165.6	127.9	116.17	73.02	118.05	144.68	46.01	161.33	85.66	72.54	58.48	28.88	-0.284563	7.56379e-83	-0.46457	3.31435e-204	-1.35119	0	-0.180007	2.74449e-29	-1.06663	0	-0.886621	0
CL843.Contig10_All	74.29	90.46	108.55	84.12	68.91	69.22	148.6	120.63	89.76	122.51	169.51	187.65	-0.294088	6.03052e-59	0.405029	1.70239e-139	0.821675	0	0.699118	0	1.11576	0	0.416646	1.54695e-196
CL8431.Contig4_All	11.69	14.69	8.27	29.76	19.41	19.37	9.5	18.84	22.28	4.99	10.26	16.92	0.991332	3.72506e-64	0.569785	1.40671e-19	-0.0834139	0.0609979	-0.421547	1.67338e-15	-1.07475	8.98839e-74	-0.653199	1.19764e-24
CL8442.Contig1_All	14.12	12.49	11.32	16.39	19.46	7.85	43.8	17.61	22.96	4.46	7.09	13.9	0.206448	3.11392e-13	1.15353	0	-0.568601	2.70705e-68	0.947082	0	-0.775049	1.1344e-134	-1.72213	0
CL8442.Contig4_All	46.25	39.37	26.05	37.75	95.45	44.72	63.44	64.2	67.91	20.99	14.05	37.5	0.672453	0	0.814393	0	-0.615004	1.32109e-217	0.14194	2.26566e-25	-1.28746	0	-1.4294	0
CL8442.Contig9_All	51.86	16.91	51.31	10.12	4.42	14.1	6.17	11.55	9.15	7.72	14.27	13.77	-2.06526	0	-2.14958	0	-1.74258	0	-0.0843178	0.00844034	0.322683	6.84986e-21	0.407	1.17259e-30
CL845.Contig11_All	18.22	11.72	19.5	15.13	12.92	12.58	6.82	9.09	8.48	8.77	18.9	14.02	-0.280895	2.51543e-28	-1.01309	1.76395e-268	-0.242797	4.23963e-22	-0.732195	7.48716e-128	0.0380983	0.0261031	0.770294	3.48621e-144
CL8470.Contig3_All	8.68	16.88	12.9	21.11	21.83	15.54	33.86	27.58	29.5	10.13	10.89	21.02	0.607105	1.01381e-84	1.2475	0	0.135899	2.07686e-05	0.640392	2.87709e-143	-0.471206	7.7111e-55	-1.1116	0
CL8474.Contig2_All	11.83	22.08	15.21	47.18	29.98	31.02	38.26	50.55	62.77	5.84	11.49	10.81	1.14754	3.84811e-117	1.65043	4.35469e-285	-0.78197	1.60319e-29	0.502882	7.59514e-41	-1.92951	2.98202e-252	-2.4324	0
CL850.Contig4_All	55.7	132.06	113.1	146.21	118.07	106.59	60.75	107.64	71.87	125.65	160.84	208.98	0.305167	1.56072e-109	-0.311479	3.82361e-92	0.727962	0	-0.616647	0	0.422795	7.82073e-270	1.03944	0
CL8505.Contig3_All	8.67	8.4	4.79	29.2	20.92	20.97	10.14	15.5	15.34	0.53	1.74	1.65	1.70484	0	0.915467	1.69828e-131	-2.47479	2.49445e-297	-0.789369	1.30036e-175	-4.17963	0	-3.39026	0
CL8527.Contig15_All	12.59	9.97	9.55	19.35	24.17	16.16	6.7	11.5	16.87	3.51	8.14	8.17	0.897881	6.86863e-99	0.13936	0.00162988	-0.685445	8.57688e-35	-0.758522	4.00399e-74	-1.58333	1.35832e-241	-0.824805	1.32556e-51
CL8533.Contig2_All	70.44	28.83	69.06	10.48	9.42	12.58	2.47	10.2	11.46	41.7	86.56	35.28	-2.37217	0	-2.79148	0	-0.0400603	0.000969387	-0.419303	3.26651e-37	2.33211	0	2.75141	0
CL8533.Contig7_All	53.18	44.3	94.99	72.44	32.46	34.86	102.38	66.47	88.66	106.37	172.88	179.03	-0.455089	8.56673e-76	0.43233	2.42068e-92	1.26428	0	0.887419	0	1.71937	0	0.831951	0
CL8541.Contig2_All	11.53	13	9.37	13.98	15.84	11.09	6.23	11.72	11.52	3.79	8.14	7.83	0.275763	3.26828e-08	-0.186279	0.000320496	-0.766796	1.68632e-36	-0.462042	1.51386e-18	-1.04256	1.68719e-72	-0.580518	2.15132e-20
CL8543.Contig42_All	30.45	52.68	27.04	96.81	40.18	65.15	85.21	107.67	119.15	9.56	27	26.97	0.881062	1.74542e-238	1.51718	0	-0.780763	6.65873e-107	0.636122	1.80402e-209	-1.66183	0	-2.29795	0
CL8547.Contig7_All	18.26	22.54	21.72	19.94	25.2	26.78	12.43	29.96	29.04	12.55	7.97	7.6	0.204782	4.07541e-10	0.20644	3.268e-10	-1.14526	5.7853e-165	0.00165762	0.234201	-1.35004	2.0698e-245	-1.3517	5.71647e-245
CL8549.Contig5_All	14.92	11.18	19.05	9.75	6	6.35	13.43	10.97	12.01	16.08	24.52	28	-1.02793	2.48055e-191	-0.305757	2.71015e-23	0.60853	1.261e-119	0.722168	1.88283e-85	1.63646	0	0.914287	4.6441e-240
CL8574.Contig5_All	28.1	13.4	32.09	28.04	9.92	13.9	9.02	18.77	11.08	3.09	6.35	3.28	-0.499999	1.67637e-89	-0.909217	8.10461e-253	-2.52939	0	-0.409218	1.90478e-44	-2.02939	0	-1.62017	0
CL8575.Contig8_All	3.99	6.05	3.15	24.95	16.59	16.69	22.75	27.32	33.04	0.41	0.99	1.55	2.14534	0	2.66086	0	-2.15867	8.68085e-244	0.515524	2.54635e-154	-4.304	0	-4.81953	0
CL8579.Contig11_All	12.88	16.62	19.53	17.09	21.69	20.73	13.12	18.63	17.59	4.21	6.27	10.2	0.281158	1.38519e-19	0.0188251	0.158547	-1.23728	4.64064e-206	-0.262333	2.67039e-17	-1.51844	0	-1.25611	7.95481e-213
CL8587.Contig4_All	6.76	13.6	4.54	8.67	28.8	17.49	5.47	15.01	14.04	4.33	1.09	3.86	1.14261	1.68852e-186	0.483937	4.18167e-28	-1.41602	2.26585e-119	-0.658671	5.82013e-74	-2.55862	0	-1.89995	4.16668e-251
CL8595.Contig21_All	10.09	17.7	5.83	14.44	28.64	19.72	8.16	8.17	20.28	4.58	5.37	9.65	0.902975	3.10666e-124	0.129982	0.00116098	-0.768503	7.19041e-52	-0.772992	3.79621e-95	-1.67148	0	-0.898485	5.32567e-73
CL8595.Contig23_All	13.05	15.97	7.93	10.19	27.95	23.1	6.13	10.56	16.13	4.5	5.23	8.89	0.729867	3.99293e-85	-0.160675	0.000102093	-0.978709	3.08868e-85	-0.890542	1.58043e-118	-1.70858	0	-0.818033	1.05772e-56
CL8595.Contig43_All	6.29	12.39	5.63	12.02	35.13	20.87	8.97	12.03	12.1	5.05	7.98	12.07	1.48513	1.6569e-295	0.455484	4.30496e-21	0.0559686	0.0711665	-1.02965	3.41165e-166	-1.42916	7.35086e-281	-0.399515	4.5233e-17
CL8601.Contig3_All	14.44	13.14	7.3	35.38	28.36	30.39	20.96	29.46	29.45	7.35	14.64	11.09	1.43654	0	1.20805	4.65104e-222	-0.0675207	0.0406546	-0.228494	9.09532e-15	-1.50406	0	-1.27557	6.77259e-243
CL8611.Contig1_All	22.64	53.38	21.1	5.61	6.72	4.15	12.79	5.56	11.73	17.57	31.94	19.25	-2.55563	0	-1.68483	0	-0.491067	5.5094e-60	0.870796	4.60604e-51	2.06456	0	1.19376	1.37981e-192
CL8618.Contig10_All	24.15	16.69	17.32	22.03	26.74	30.12	13.11	20.24	16.79	3.8	9.06	9.35	0.44117	1.37649e-92	-0.20538	1.63935e-17	-1.38412	0	-0.646549	1.51617e-182	-1.82529	0	-1.17874	0
CL8618.Contig6_All	29.4	20.98	24	25.79	26.95	27.54	12.61	22.04	18.83	5.66	12.35	11.95	0.112093	1.81263e-08	-0.466961	9.97096e-96	-1.30751	0	-0.579054	1.07207e-151	-1.41961	0	-0.840554	2.70545e-196
CL8638.Contig1_All	10.49	14.1	9.23	25.76	12.68	12.19	21.73	13.51	25.33	8.36	14.49	6.43	0.589211	1.09138e-22	0.857852	3.7394e-50	-0.195214	0.00148049	0.268641	1.27584e-07	-0.784425	6.46276e-37	-1.05307	2.94204e-70
CL8646.Contig4_All	23.26	20.25	18.35	10.91	17.86	16.17	13.58	14.96	17.3	19.03	47.3	39.88	-0.460032	7.67324e-63	-0.425616	1.62663e-54	0.784717	5.15151e-277	0.0344165	0.0706129	1.24475	0	1.21033	0
CL8651.Contig9_All	12.06	16.36	16.11	44.39	22.89	20.16	41	38.64	43.44	6.19	17.91	17.94	0.979054	1.5619e-161	1.47812	0	-0.0723598	0.0258401	0.499068	1.11369e-70	-1.05141	8.93823e-183	-1.55048	0
CL8667.Contig1_All	9.72	11.18	4.02	22.04	13.22	11.09	10.52	12.72	14.93	2.98	8.34	6.13	0.900385	1.19121e-101	0.62494	2.13147e-45	-0.50602	2.068e-21	-0.275445	2.21732e-13	-1.4064	9.41079e-208	-1.13096	3.29776e-122
CL8677.Contig7_All	5.73	11.08	9.5	16.91	10.8	7.74	19.32	18.01	16.21	11.07	19.19	21.53	0.434583	2.92668e-21	1.03422	9.5211e-137	0.985071	2.67497e-123	0.599636	2.05291e-54	0.550487	2.90547e-46	-0.0491491	0.0444647
CL8684.Contig3_All	26.44	32.42	29.01	68.46	60.63	55.41	49.46	76.06	58.13	23.65	32.62	36.21	1.07639	5.79421e-248	1.08436	1.65012e-251	0.0895811	0.00546973	0.0079692	0.192356	-0.986813	1.17161e-216	-0.994782	1.22474e-219
CL8688.Contig2_All	17.48	16.63	10.78	27.09	21.52	22.34	9.41	19.32	15.22	5.86	10.7	6.38	0.663952	2.95152e-85	-0.0172622	0.179523	-0.962505	2.87498e-102	-0.681214	1.15934e-88	-1.62646	0	-0.945242	1.08239e-97
CL8688.Contig4_All	20.35	18.16	16.2	25.64	25.73	29.08	6.56	26.97	24.21	10.68	15.62	12.97	0.559811	2.17935e-65	0.0935303	0.00326665	-0.470298	1.65951e-33	-0.466281	3.92972e-47	-1.03011	4.00365e-186	-0.563828	1.47685e-48
CL8708.Contig2_All	17.86	15.91	15.45	13.63	13.39	13.19	5.87	10.69	12.61	12.7	25.2	22.68	-0.289684	4.60634e-27	-0.74671	1.98683e-144	0.30375	3.49619e-36	-0.457026	5.1454e-50	0.593435	1.97235e-120	1.05046	0
CL8709.Contig2_All	18.98	17.52	21.56	34.49	33.54	38.34	27.09	44.87	47.54	3.39	6.08	6.61	0.875139	0	1.04889	0	-1.8484	0	0.173752	3.28251e-26	-2.72354	0	-2.89729	0
CL8722.Contig5_All	91.6	70.81	96.33	78.83	29.49	45.52	78.76	68.97	81.63	102.44	139.38	192.68	-0.744803	0	-0.16461	8.95689e-23	0.757552	0	0.580194	1.74803e-202	1.50236	0	0.922162	0
CL8725.Contig3_All	5.13	7.86	4.94	18.94	20.74	22.96	9.9	25.16	22.75	0.69	1.51	1.05	1.80719	0	1.70069	0	-2.45638	2.58964e-226	-0.106497	4.4248e-05	-4.26357	0	-4.15707	0
CL8734.Contig12_All	17.75	15.73	18.94	27.77	26.61	33.88	23.59	33.6	26.16	6.39	6.68	8.64	0.75331	4.00437e-212	0.677751	4.40034e-167	-1.26649	8.59141e-299	-0.0755593	0.000197295	-2.0198	0	-1.94424	0
CL8754.Contig21_All	51.75	29.14	62	36.7	15.8	28.57	33.76	44.79	38.31	45.46	64.53	59.11	-0.813932	0	-0.281178	5.33744e-51	0.248295	2.11238e-48	0.532754	9.76187e-135	1.06223	0	0.529473	6.24482e-193
CL8754.Contig3_All	100.46	101.71	221.32	73.26	28.43	78.16	25.12	100.99	64.97	71.03	83.32	33.13	-1.23117	0	-1.12942	0	-1.16944	0	0.101742	6.76891e-07	0.0617206	0.000705526	-0.0400213	0.0160196
CL8785.Contig2_All	5.57	9.25	3.65	37.08	43.92	37.9	39.62	37.33	42.09	0.95	1.36	2.54	2.68937	0	2.69758	0	-1.92117	1.87823e-115	0.00821863	0.185026	-4.61054	0	-4.61876	0
CL882.Contig39_All	30.72	37.36	29.32	21.73	35.97	41.88	5.15	17.84	17.97	14.64	33.19	18.87	0.0329308	0.0384678	-1.23792	0	-0.542444	2.92346e-115	-1.27085	0	-0.575375	3.61419e-131	0.695477	1.03766e-122
CL882.Contig50_All	17.28	19.2	11.45	31.15	33.61	30.34	12.24	20.31	19.77	4.83	10.23	10.15	0.991075	2.97917e-293	0.136815	6.72018e-06	-0.920227	4.39384e-132	-0.85426	1.12963e-227	-1.9113	0	-1.05704	2.70752e-181
CL8822.Contig1_All	16.52	18.8	25.48	19.88	12.59	10.85	24.26	20.76	23.37	23.71	39.48	37.74	-0.483387	6.34554e-29	0.182817	1.16134e-06	0.742781	2.81896e-100	0.666204	2.52711e-56	1.22617	6.26971e-229	0.559964	3.50607e-61
CL883.Contig22_All	10	12.86	8.53	29.29	17.35	15.57	11.25	20.23	21.53	3.32	4.45	6.1	0.9905	8.04077e-284	0.764197	1.95328e-156	-1.17239	1.46916e-189	-0.226303	6.62185e-21	-2.16289	0	-1.93659	0
CL883.Contig9_All	14.09	18.52	14.77	36.11	27.13	25.73	44.13	46.7	36.33	4.38	8.03	14.27	0.912536	1.57281e-213	1.43376	0	-0.819119	5.56687e-96	0.521222	1.09329e-114	-1.73166	0	-2.25288	0
CL8869.Contig5_All	21.04	43.31	18.9	48.1	44.28	28.04	37.07	43.49	35.84	6.37	12.29	15.99	0.535554	2.06655e-123	0.492549	8.21393e-103	-1.25714	0	-0.043005	0.0129681	-1.79269	0	-1.74969	0
CL8869.Contig6_All	19.25	29.47	14.11	24.46	30.19	24.86	18.16	25.31	20.59	5	9.37	10.02	0.341627	8.53027e-37	0.0381182	0.0566484	-1.35821	0	-0.303509	1.20038e-29	-1.69983	0	-1.39632	0
CL8870.Contig1_All	27.99	10.87	36.58	9.89	4.5	11.64	3.62	10.25	12.88	16.41	28.81	20.55	-1.532	0	-1.48447	0	-0.192687	3.10791e-13	0.0475276	0.0789864	1.33932	0	1.29179	9.67982e-305
CL894.Contig14_All	15.71	22.32	19.11	27.32	19.21	11.39	24.99	31.17	31.03	16.94	48.97	51.77	0.0246582	0.135908	0.622379	2.41115e-75	1.05333	9.13769e-249	0.597721	4.63783e-70	1.02867	1.53923e-239	0.430952	6.77291e-53
CL8943.Contig1_All	6.77	7.01	6.45	12.65	12.93	10.23	19.42	14.93	17.37	6.16	11.13	9.24	0.828339	1.38548e-41	1.3673	5.2884e-132	0.402421	4.69593e-10	0.538961	1.00766e-28	-0.425918	2.51031e-14	-0.964879	9.77321e-77
CL8952.Contig6_All	24.04	37.38	18.98	11.19	25.06	19.34	9.46	11.03	12.19	10.68	15.93	12.58	-0.529496	2.62769e-44	-1.28522	6.3508e-194	-1.02678	3.76305e-137	-0.755726	6.0515e-57	-0.497288	1.34065e-28	0.258438	2.49632e-07
CL8960.Contig8_All	70.32	120.61	92.15	99.06	76.03	74.82	155.72	114.2	130.74	108.25	216.4	315.35	-0.176301	1.60225e-30	0.508586	8.66507e-304	1.18629	0	0.684888	0	1.36259	0	0.677702	0
CL8974.Contig4_All	12.07	31.77	29	41.2	41.07	38.02	50.41	48.11	32.71	14.32	9.2	9.78	0.7278	7.96255e-124	0.862769	5.74978e-181	-1.12058	3.38818e-155	0.134969	1.91202e-07	-1.84838	0	-1.98335	0
CL8982.Contig2_All	13.04	15.7	12.01	31.32	24.67	22.62	20.58	24.82	23.27	4.68	10.5	15.65	0.953937	3.17468e-93	0.771054	1.09148e-57	-0.384623	2.57187e-11	-0.182882	3.61015e-06	-1.33856	1.36345e-160	-1.15568	2.97214e-112
CL90.Contig38_All	7.03	17.44	10.58	20.59	16.48	12.22	40.98	29.83	22.27	11.1	13.94	31.1	0.496098	7.21663e-28	1.4202	5.79593e-295	0.693241	1.22886e-56	0.924103	7.6763e-149	0.197143	2.28351e-07	-0.72696	6.46887e-100
CL900.Contig3_All	11.33	8.51	9.66	15.62	16.52	12.71	6.05	12.69	13.39	4.68	6.77	4.84	0.609936	1.28484e-26	0.141985	0.00803684	-0.844434	8.8259e-31	-0.467951	4.44196e-17	-1.45437	6.82233e-108	-0.986419	4.70401e-43
CL9014.Contig6_All	11.74	11.52	9.27	15.26	19.67	16.06	10.2	13.01	12.84	4.11	8.31	8.42	0.650203	3.60084e-108	0.155603	6.48249e-07	-0.638041	8.37428e-68	-0.494601	2.08824e-66	-1.28824	0	-0.793643	4.83451e-109
CL9027.Contig10_All	9.67	9.47	14.54	19.2	20.65	12.88	14.64	23.49	25.94	6.92	12.32	10.23	0.650796	2.16211e-50	0.940965	9.28402e-114	-0.183013	9.72668e-05	0.290169	3.77536e-15	-0.833809	1.95014e-77	-1.12398	1.61984e-152
CL9027.Contig13_All	18.6	25.33	17.63	33.83	25.33	26.26	48.41	33.43	48.31	16.24	24.96	38.75	0.476605	1.39245e-48	1.08887	6.44302e-303	0.388377	3.22085e-32	0.612268	8.59595e-114	-0.0882279	0.000743749	-0.700496	5.05522e-145
CL9027.Contig2_All	13.61	13.91	11.46	17.54	15.25	16.91	12.09	15.3	20.36	8.41	5.79	8.65	0.354408	4.64537e-16	0.305133	3.75219e-12	-0.760531	1.25247e-46	-0.0492747	0.0684482	-1.11494	8.04686e-111	-1.06566	4.78651e-99
CL9038.Contig3_All	13.3	17.3	6.85	14.76	32.36	32.8	12.39	15.84	15.66	4.35	6.85	6.02	1.09451	1.02962e-295	0.238067	4.02056e-12	-1.11425	2.89711e-144	-0.856444	3.47836e-196	-2.20876	0	-1.35231	9.08483e-229
CL906.Contig34_All	16.19	12.14	7.25	12.74	28.82	11.35	3.88	11.63	12.83	4	8.93	6.29	0.572743	2.71674e-114	-0.318806	2.4523e-27	-0.885718	4.16773e-165	-0.891549	8.47183e-245	-1.45846	0	-0.566912	1.81557e-61
CL9071.Contig1_All	30.23	37.91	34.93	23.75	44.75	34.21	14.15	24.78	28.55	31.84	52.29	56.21	-0.00325681	0.220809	-0.599571	2.20464e-101	0.453662	9.53191e-85	-0.596314	5.5179e-100	0.456919	4.0731e-86	1.05323	0
CL9071.Contig2_All	11.7	14.69	7.41	2.83	2.58	4.98	13.98	6.9	5.13	15.13	25.87	21.18	-1.69964	1.94552e-164	-0.370154	5.09952e-14	0.887741	3.01361e-111	1.32949	7.79919e-89	2.58738	0	1.2579	2.86898e-194
CL9082.Contig3_All	15.4	16.58	12.76	27.69	37.07	21.81	18.1	16.77	22.6	7.02	14.38	15.46	0.959343	3.41655e-84	0.380921	1.99395e-12	-0.26082	6.9983e-06	-0.578423	8.13155e-36	-1.22016	1.31224e-124	-0.64174	1.72877e-29
CL909.Contig11_All	4.17	11.9	6.17	16.83	15.23	13.83	13.97	12.64	12.96	4.31	8.73	8.95	1.04754	2.30225e-129	0.839014	1.12937e-77	-0.00855831	0.197594	-0.208529	1.50637e-08	-1.0561	3.87473e-132	-0.847572	2.04681e-79
CL909.Contig8_All	12.59	10.93	7.09	14.91	20	17.83	4.74	14.18	8.77	2.97	5.56	4.9	0.786703	5.21958e-114	-0.130659	0.000552186	-1.18249	9.93953e-131	-0.917362	6.80844e-147	-1.96919	0	-1.05183	7.10294e-99
CL9093.Contig4_All	103.82	41.23	116.45	30.21	22.38	34.71	10.13	39.13	35.1	45.54	78.96	47.71	-1.57941	0	-1.617	0	-0.596075	6.61917e-248	-0.037584	0.0527959	0.983337	0	1.02092	0
CL9118.Contig1_All	43.61	16.17	62.99	20.74	16.32	14.86	15.5	32.78	17.42	13.59	39.79	36.28	-1.23585	3.88562e-265	-0.881806	8.11054e-153	-0.440118	3.92255e-46	0.354042	1.155e-17	0.79573	2.39039e-96	0.441688	1.50327e-34
CL9123.Contig5_All	15.13	13.06	16.49	20.88	13.28	26.29	3.48	7.7	11.94	7.8	11.5	5.96	0.438945	2.09689e-46	-0.941099	1.8282e-128	-0.818706	8.87677e-103	-1.38004	0	-1.25765	2.16875e-279	0.122392	0.00214947
CL9143.Contig4_All	12.72	11.59	9.61	21.63	17.98	19.61	13.29	13.18	9.74	5.44	9.27	9.23	0.80832	1.04854e-72	0.108385	0.0114225	-0.491195	1.02679e-18	-0.699935	1.04991e-56	-1.29952	1.29765e-157	-0.59958	9.62198e-28
CL9143.Contig5_All	6.87	7.53	6.13	20.66	13.95	14.62	15.19	14	11.51	2.69	6.32	8.06	1.26631	2.68096e-132	0.999323	1.21924e-75	-0.253737	5.82903e-05	-0.266989	5.47351e-10	-1.52005	2.62217e-175	-1.25306	1.10083e-108
CL9159.Contig2_All	31.59	46.01	21.79	55.38	68.92	35.03	26.75	41.9	29.46	4.03	7.64	7.61	0.686925	5.23506e-102	0.00178134	0.251588	-2.35095	0	-0.685144	5.04141e-101	-3.03787	0	-2.35273	0
CL9173.Contig4_All	11.83	14.64	10.64	17.65	18.11	16.59	8.81	14.53	15.82	5.93	10.97	9.13	0.49977	8.86975e-42	0.0892373	0.0088071	-0.504572	7.56832e-31	-0.410533	1.72887e-29	-1.00434	2.09253e-138	-0.593809	5.22448e-43
CL9181.Contig1_All	12.8	13.02	17.68	23.59	33.93	9.84	32.84	26.28	22	13.38	6.72	17.14	0.640805	1.02008e-30	0.923043	1.10051e-67	-0.202321	0.000554395	0.282238	1.66891e-09	-0.843125	4.56647e-49	-1.12536	1.39233e-93
CL9194.Contig1_All	11.78	23.08	12.98	43.69	35.82	32.21	39.45	43.77	51.12	6.37	6.72	11.55	1.22859	2.97316e-245	1.50369	0	-0.943807	6.68929e-70	0.275103	2.87065e-22	-2.1724	0	-2.4475	0
CL9194.Contig3_All	12.79	21.75	17.54	38.48	31.7	32.11	37.72	51.9	53.47	10.38	13.76	21.5	0.978567	4.37874e-155	1.47314	0	-0.176484	3.24746e-05	0.494574	1.13951e-66	-1.15505	3.88994e-204	-1.64963	0
CL9202.Contig11_All	102.86	189.26	98.27	99.58	136.52	132.1	253.45	148.95	167.33	193.02	300.62	275.84	-0.0805691	6.40739e-07	0.557724	5.34005e-306	0.990854	0	0.638293	0	1.07142	0	0.433129	1.06541e-261
CL9205.Contig3_All	6.51	9.25	6.98	22.01	17.33	17.29	12.69	13.95	13.95	3.23	5.9	6.19	1.32316	2.92108e-104	0.855398	4.06107e-38	-0.552963	2.61032e-11	-0.467765	5.7043e-19	-1.87613	3.49749e-173	-1.40836	1.81735e-83
CL9205.Contig4_All	13.95	15.04	14.34	30.23	30.97	25.29	18.88	18.35	15.07	6.3	12.87	9.2	1.00278	4.56694e-114	0.288763	4.61533e-09	-0.598024	5.52333e-25	-0.714013	2.29857e-64	-1.6008	5.07177e-236	-0.886787	1.18015e-57
CL9231.Contig11_All	127.41	74	78.87	59.21	96.43	55.72	20.46	89.48	69.27	29.07	25.03	38.43	-0.405237	2.59622e-191	-0.630983	0	-1.59163	0	-0.225746	8.66544e-49	-1.18639	0	-0.960645	0
CL9236.Contig1_All	259.94	163.52	123.43	457.43	214.79	202.43	101.55	133.36	92.95	118.49	110.32	228.83	0.68286	0	-0.726173	0	-0.246767	2.9575e-109	-1.40903	0	-0.929627	0	0.479406	0
CL9237.Contig5_All	10.67	31.58	27.99	2.77	7.65	3.41	5.26	8.64	13.41	11.86	24.04	35.54	-2.34442	0	-1.35648	0	0.0303849	0.051794	0.987942	3.12572e-105	2.3748	0	1.38686	0
CL9254.Contig6_All	18.43	19.39	24.22	7.95	3.95	3.83	1.89	4.03	6.04	15.99	21.76	16.94	-1.97598	0	-2.36709	0	-0.177623	9.66894e-12	-0.39111	5.89208e-13	1.79836	0	2.18947	0
CL9260.Contig14_All	37.2	45.02	33.21	3.42	3.55	6.98	1.88	2.22	2.3	7.31	13.58	10.99	-3.04673	0	-4.16094	0	-1.84876	0	-1.11421	2.37419e-39	1.19797	6.30083e-100	2.31218	1.54537e-248
CL9265.Contig2_All	17.28	29.41	14.17	30.19	29.37	23.96	14.22	30.41	28.88	5.76	7.47	10.7	0.459611	3.16861e-51	0.285237	1.07473e-19	-1.33735	1.06509e-227	-0.174374	1.22e-09	-1.79696	0	-1.62259	0
CL9265.Contig3_All	22.46	24.11	20.33	17.73	20.9	24.29	5.99	20.2	19.08	5.39	8.28	9.84	-0.0862476	0.00194527	-0.549457	2.77816e-60	-1.50091	0	-0.463209	4.62838e-42	-1.41466	3.8183e-275	-0.95145	1.40395e-106
CL9273.Contig5_All	17.74	22.05	21.08	21.13	27.4	32.68	8.21	19.9	18.67	8.16	10.42	9.6	0.417672	1.22728e-47	-0.367101	1.02846e-28	-1.10412	5.43533e-192	-0.784773	1.50709e-143	-1.52179	0	-0.737018	4.13824e-76
CL9273.Contig6_All	27.92	23.02	21.32	30.66	21.38	36.98	12.33	20.49	19.09	6.31	9.89	9.58	0.303825	1.38355e-28	-0.465685	8.66165e-50	-1.4793	0	-0.76951	4.23167e-147	-1.78312	0	-1.01361	1.19926e-138
CL9275.Contig2_All	8.38	12.78	9.96	26.8	17.44	16.2	7.5	13.9	16.46	4.55	7.86	11.24	0.964086	2.3889e-73	0.301203	2.45632e-07	-0.379165	6.84222e-09	-0.662883	3.66007e-39	-1.34325	1.22885e-124	-0.680367	9.31856e-27
CL9275.Contig5_All	23	28.02	21.77	51.51	32.31	44.55	25.86	32.79	36.94	9.12	16.55	27.52	0.824012	9.28716e-124	0.41008	6.51212e-28	-0.435286	4.76466e-24	-0.413932	4.24434e-37	-1.2593	1.70984e-248	-0.845367	1.26664e-97
CL9283.Contig3_All	10.2	11.53	13.25	7.08	8.78	4.96	34.67	28.48	43.61	7.75	17.74	28.33	-0.742015	1.00748e-26	1.62617	1.04646e-272	0.641056	4.30221e-32	2.36818	0	1.38307	9.81857e-111	-0.985112	1.6131e-126
CL9293.Contig1_All	19.2	32.67	13.66	35.83	26.94	14.71	10.34	18.41	11.61	12.84	12.13	9.11	0.248153	2.75799e-09	-0.678076	4.86512e-42	-0.93179	4.554e-72	-0.926229	2.09305e-83	-1.17994	8.65378e-125	-0.253714	6.08367e-06
CL9301.Contig1_All	113.5	53.84	61.18	34.18	60.7	53.17	14	39.84	38.97	39.83	54.79	55.23	-0.624358	5.05314e-294	-1.28704	0	-0.601771	5.75337e-277	-0.662685	2.05666e-211	0.0225873	0.0392977	0.685273	2.95434e-229
CL9309.Contig4_All	12.6	17.3	6.93	24.06	18.02	19.87	7.79	12.13	13.95	3.47	4.88	7.28	0.753345	1.16669e-144	-0.112486	0.000428395	-1.2291	2.78474e-194	-0.865831	2.10607e-182	-1.98245	0	-1.11662	6.13913e-154
CL9310.Contig4_All	20.39	17.78	12.4	17.75	38.9	25.77	11.93	16.69	18.48	9.28	13.17	12.97	0.707846	2.40594e-77	-0.0885722	0.0147632	-0.502785	3.98617e-27	-0.796418	4.70244e-94	-1.21063	7.31179e-189	-0.414213	2.0785e-18
CL9310.Contig5_All	18.89	18.04	16.94	19.91	36.44	24.02	12.36	19.46	11.08	8.86	13.93	13.59	0.580399	3.8197e-53	-0.31159	1.17237e-12	-0.555188	8.5592e-34	-0.891989	4.44213e-110	-1.13559	3.34535e-165	-0.243597	2.38781e-07
CL9315.Contig1_All	15.45	26.97	8.39	21.67	44.88	42.35	6.71	16.34	18.98	5.07	5.76	10.86	1.10086	0	-0.262523	4.76143e-15	-1.21909	2.55568e-208	-1.36338	0	-2.31994	0	-0.956564	2.17637e-117
CL9325.Contig8_All	13.48	16.58	14.32	27.36	24.76	18.14	14.53	21.18	22.09	7.47	13.63	13.22	0.666531	3.10923e-82	0.392645	3.89499e-27	-0.362568	1.09759e-18	-0.273886	2.56274e-17	-1.0291	3.23113e-172	-0.755213	8.41871e-85
CL9326.Contig2_All	21.32	32.98	24.2	48.63	44.48	29.43	44.67	42.79	44.35	8.66	16.09	25.35	0.648741	3.57868e-75	0.764738	1.30149e-107	-0.629975	1.39078e-46	0.115997	8.04346e-05	-1.27872	1.23956e-232	-1.39471	2.63985e-286
CL9334.Contig5_All	22.91	33.52	20.44	58.98	34.57	33.13	27.51	55.53	49.64	7.29	13.19	10.82	0.725148	2.68229e-171	0.800638	2.91608e-213	-1.28887	7.04014e-270	0.07549	0.000356327	-2.01402	0	-2.08951	0
CL9345.Contig2_All	61.56	40.02	72.82	36.18	16.43	24.14	18.44	37.71	34.18	37.65	57.34	47.86	-1.18014	0	-0.938648	0	-0.282984	4.49026e-65	0.24149	6.47799e-26	0.897154	0	0.655664	5.71417e-246
CL9366.Contig5_All	18.54	16.96	13.84	25.48	33.58	26.2	12.85	15.94	21.63	7.97	15.16	14.32	0.792861	1.47634e-94	0.0444818	0.092876	-0.386706	1.12978e-16	-0.748379	2.84126e-85	-1.17957	9.97897e-183	-0.431188	1.97892e-20
CL9384.Contig1_All	35.78	31.22	35	10.24	15.47	30	13.51	15.07	15.78	11.23	26.69	27.54	-0.871352	4.66297e-232	-1.19257	0	-0.632573	2.17789e-134	-0.321222	2.06726e-22	0.238779	3.89969e-16	0.560002	2.99499e-70
CL9384.Contig3_All	20.27	19.58	18.94	5.6	9.3	17.41	5.18	6.25	8.86	3.75	11.56	7.89	-0.862675	4.61869e-137	-1.5269	0	-1.33616	6.25667e-279	-0.664229	8.81638e-49	-0.473481	5.61449e-28	0.190748	3.84947e-05
CL9403.Contig1_All	5.38	9.22	5.95	17.22	10.94	10.05	21.31	17.37	11.64	2.03	4.44	5.95	0.902123	6.47162e-39	1.31111	8.494e-92	-0.707674	4.56272e-15	0.408988	8.75128e-14	-1.6098	4.15537e-95	-2.01878	1.17203e-169
CL9403.Contig2_All	10.87	12.82	12.32	15.4	19.61	21.5	7.97	17.68	19.58	3.38	7.24	6.31	0.654664	5.20405e-38	0.347265	5.97389e-11	-1.0748	9.05979e-56	-0.307399	8.74263e-11	-1.72946	3.75271e-177	-1.42206	8.84456e-108
CL9436.Contig3_All	23.5	18.63	26.92	15.22	9.67	10.12	17.43	16.4	17.82	16.55	30.88	27.15	-0.977207	0	-0.414465	7.01283e-78	0.114318	6.43746e-09	0.562742	1.49742e-101	1.09152	0	0.528783	2.53977e-131
CL9449.Contig7_All	18.6	16.02	15.53	21.14	37.39	27.83	16.59	22.54	18.15	9.24	9.36	8.92	0.786146	2.42429e-131	0.203809	6.5856e-09	-0.858319	1.05678e-89	-0.582337	1.17047e-77	-1.64447	0	-1.06213	1.33939e-145
CL945.Contig6_All	28.52	56.09	28.65	75.93	53.7	44.13	94.99	69.96	74.89	48.27	72.1	82.46	0.625067	1.05906e-77	1.10317	3.74017e-280	0.859789	1.3868e-158	0.478104	1.54433e-66	0.234722	1.11082e-16	-0.243382	3.24151e-20
CL9450.Contig3_All	32.42	45.95	52.93	75.05	66.83	73.06	40.32	65.44	75.72	8.46	13.81	17.73	0.714821	7.14216e-233	0.479988	1.75693e-97	-1.70375	0	-0.234833	4.21189e-31	-2.41857	0	-2.18374	0
CL9466.Contig1_All	10.46	21.68	11.12	14.18	20.94	27.58	8.96	13.46	21.22	4.99	6.11	8.24	0.53762	2.32607e-43	0.0239992	0.160473	-1.15111	1.45211e-108	-0.51362	7.63993e-40	-1.68873	8.33712e-279	-1.17511	1.70485e-113
CL948.Contig10_All	5.33	13.58	6.62	15.98	14.7	4.63	22.33	12.86	17.44	7.73	18.75	14.36	0.476102	6.4011e-12	1.06196	5.12209e-63	0.695294	3.04041e-25	0.58586	9.26546e-24	0.219192	8.77968e-05	-0.366668	3.23672e-11
CL9496.Contig2_All	7.79	15.72	23.44	11.03	6.28	8.54	28.51	12.5	12.39	9.19	35.36	20.34	-0.853272	2.8727e-39	0.205281	6.96931e-05	0.484767	2.94068e-21	1.05855	2.39324e-63	1.33804	1.06484e-111	0.279486	9.59636e-09
CL95.Contig34_All	189.05	104.79	280.2	63.91	72.73	94.29	89.26	150.98	89.42	47.45	189.89	131.33	-1.3118	0	-0.788138	0	-0.633233	0	0.52366	0	0.678565	0	0.154905	3.87273e-37
CL95.Contig35_All	79.56	22.72	86.75	18.24	13.03	39.1	15.7	30.82	19.1	18.4	36.78	27.42	-1.42342	0	-1.51357	0	-1.18868	0	-0.0901447	0.00044679	0.234744	5.87904e-20	0.324888	9.90483e-35
CL95.Contig47_All	163.38	72.12	231.58	58.26	47.79	89.59	53.28	98.16	71.06	72.64	118.38	77.77	-1.25339	0	-1.0584	0	-0.792543	0	0.19499	1.00982e-36	0.460852	2.45354e-218	0.265862	1.66218e-78
CL950.Contig1_All	7.16	4.08	11.1	11.78	9.46	13.46	56.16	28.61	20.82	24.14	18.38	32.32	0.638403	2.90213e-48	2.2458	0	1.75216	0	1.60739	0	1.11376	3.71727e-263	-0.493638	5.67054e-91
CL950.Contig13_All	22.43	21.86	44.13	1.9	1.35	0.78	2.25	1.36	2.07	26.55	47.61	56.07	-4.45183	0	-3.95958	0	0.563675	2.96551e-197	0.492251	2.16897e-08	5.01551	0	4.52326	0
CL9500.Contig1_All	19.11	13.93	7.25	18.32	28.07	22.98	9.14	24.95	23.59	4.94	9.7	7.69	0.787536	8.74854e-73	0.535183	9.08507e-32	-0.840739	3.49573e-48	-0.252354	1.46505e-10	-1.62828	3.26775e-230	-1.37592	1.8068e-150
CL9518.Contig1_All	12.47	6.66	13.65	8.51	5.56	5.91	7.55	7.4	6.65	11.25	23.13	21.43	-0.710758	5.66012e-61	-0.594007	1.02843e-44	0.773586	8.33037e-120	0.11675	0.00522304	1.48434	0	1.36759	8.27619e-301
CL9518.Contig13_All	15.28	8.11	19.85	6.43	2.56	4.34	5.41	8.02	7.5	16.48	21.4	22.15	-1.69394	0	-1.03873	9.42526e-193	0.477892	7.6971e-71	0.655205	6.14987e-44	2.17183	0	1.51662	0
CL9518.Contig2_All	17.8	7.58	28.92	13.44	5.26	11.69	8.6	8.07	12.47	14.37	38.45	32.23	-0.83368	8.16362e-132	-0.892338	2.68171e-147	0.6528	4.45339e-136	-0.0586581	0.0427304	1.48648	0	1.54514	0
CL9538.Contig2_All	12.18	15.89	9.73	17.43	24.31	12.42	12.57	15.52	18.23	6.16	9.17	8.63	0.522132	1.43802e-37	0.304414	4.61197e-13	-0.648752	6.63446e-39	-0.217719	1.07418e-08	-1.17088	1.57782e-146	-0.953166	3.28358e-90
CL9544.Contig5_All	16.3	18.83	14.99	15.64	24.92	18.87	12.07	17.84	15.99	6.18	11.47	11.11	0.249117	3.82911e-11	-0.113164	0.00210233	-0.791497	1.01432e-67	-0.362281	1.19827e-20	-1.04061	3.40754e-126	-0.678332	3.70106e-48
CL9544.Contig7_All	16.83	21.98	13.84	23.23	35.47	30.07	15.5	20.02	23.3	6.58	11.09	13.46	0.756469	7.77112e-109	0.171774	2.77793e-06	-0.747932	2.29856e-64	-0.584695	2.69825e-69	-1.5044	0	-0.919706	1.07554e-101
CL9548.Contig2_All	9.78	25.56	14.07	10.73	17.99	20	6.12	9.98	11.13	3.2	7.19	9.45	-0.0185376	0.160627	-0.848094	1.61674e-85	-1.3075	3.99364e-173	-0.829557	3.30868e-81	-1.28896	1.81346e-167	-0.459405	1.39711e-17
CL9553.Contig1_All	17.51	7.34	15.9	40.06	47.5	35.83	34.75	38.74	55.68	12.49	26.65	30.59	1.6038	0	1.6799	0	0.790262	6.10851e-66	0.0760945	0.00407519	-0.813539	1.74989e-120	-0.889634	1.42575e-146
CL9589.Contig6_All	11.8	21.65	9.53	34.29	19.47	21.21	14.04	15.47	15.15	5.09	10.97	7.54	0.807447	9.60711e-91	0.068182	0.0430776	-0.856249	2.06913e-58	-0.739265	9.98033e-78	-1.6637	1.93077e-284	-0.924431	5.10346e-69
CL9599.Contig2_All	14.93	16.12	13.34	23.7	26.85	24.94	9.9	18.15	18.24	6.56	13.57	11.28	0.77021	9.88863e-77	0.0767022	0.0333531	-0.48745	1.88548e-21	-0.693508	7.48081e-64	-1.25766	7.4574e-172	-0.564152	1.26777e-28
CL9599.Contig3_All	13.03	13.44	9.72	23.04	25.35	19.31	7.9	13.38	13.8	5.06	10.47	8.28	0.908206	5.22314e-91	-0.0294363	0.161524	-0.592593	1.2363e-24	-0.937643	2.02179e-95	-1.5008	1.15509e-201	-0.563157	4.20885e-22
CL9610.Contig3_All	13.86	18.41	13.58	22.6	21.99	17.97	17.4	19.86	19.54	5.72	7.7	12.66	0.453802	3.38998e-23	0.325625	2.59099e-12	-0.798076	5.96956e-45	-0.128177	0.00121213	-1.25188	4.37548e-126	-1.1237	5.61375e-97
CL9671.Contig1_All	52.07	81	62.84	108.85	98.68	91.38	127.7	138.23	165.44	47.26	52.96	85.61	0.614541	3.3272e-190	1.15349	0	-0.0618737	0.00261283	0.538952	7.09084e-217	-0.676414	9.48479e-227	-1.21537	0
CL9671.Contig3_All	62.03	87.17	69.55	119.99	103.19	95.49	148.95	145.76	171.48	50.88	62.93	109.5	0.547601	6.16537e-173	1.10538	0	0.0440871	0.0110443	0.557779	4.58731e-261	-0.503514	7.52201e-150	-1.06129	0
CL969.Contig15_All	44.02	40.2	65.74	24.43	26.3	25.76	54.72	43.24	53.77	59.5	101.64	82.14	-0.966466	1.25286e-212	0.0304823	0.0749973	0.709829	2.53977e-206	0.996948	2.10117e-227	1.67629	0	0.679346	2.48755e-190
CL9751.Contig5_All	26.75	21.13	17.44	34.63	33.68	30.4	15.86	30.47	27.29	6.13	10.46	8.95	0.59842	1.09166e-143	0.183313	2.5349e-13	-1.3496	0	-0.415107	3.83366e-74	-1.94802	0	-1.53291	0
CL9755.Contig1_All	18.39	27.38	16.15	37.93	41.3	38.34	22.79	25.91	30.34	6.09	9.64	14.17	0.931225	5.1078e-110	0.372389	4.77958e-16	-1.0304	2.09716e-69	-0.558836	6.56069e-46	-1.96162	0	-1.40279	1.16979e-143
CL9777.Contig2_All	60.56	45.5	75.91	151.82	97.03	160.43	165.66	195.64	114.7	15.08	35.35	26.73	1.17436	0	1.40505	0	-1.22527	0	0.230685	1.16191e-49	-2.39963	0	-2.63032	0
CL9795.Contig5_All	29.1	9.72	35.37	8.09	2.94	5.66	4.11	5.3	5.05	20.81	46.74	40.16	-2.14768	0	-2.35247	0	0.54165	8.56227e-185	-0.204784	2.61719e-06	2.68933	0	2.89412	0
CL9797.Contig3_All	70.52	48.69	92.3	63.27	39.13	35.38	72.03	58.8	66.75	73.34	150.11	105.51	-0.612512	1.02623e-145	-0.0852476	4.17785e-05	0.647965	1.15776e-252	0.527265	8.97214e-105	1.26048	0	0.733213	0
CL981.Contig7_All	161.87	45.89	106.34	54.91	98.74	78.19	37.4	73.09	84.21	27.95	49.74	33.03	-0.435864	3.94297e-184	-0.678113	0	-1.4978	0	-0.24225	4.46692e-46	-1.06193	0	-0.819684	0
CL9825.Contig2_All	73.37	51.22	107.53	83.83	29.64	48.57	162.8	146.08	137.6	182.01	413.68	302.06	-0.51375	8.92471e-212	0.95133	0	1.95709	0	1.46508	0	2.47084	0	1.00576	0
CL9825.Contig23_All	65.9	29.84	100.92	28.94	16.21	33.57	44.13	47.79	31.87	69.42	57.98	74.93	-1.31631	0	-0.653282	7.50588e-168	0.0517104	0.00404351	0.66303	6.20646e-110	1.36802	0	0.704993	1.09462e-199
CL984.Contig61_All	6.78	13.92	9.52	33.28	21.18	13.67	67.03	26.09	28.42	15.67	42.59	49.68	1.18172	3.83967e-84	2.02875	0	1.85948	2.35962e-261	0.847031	8.4256e-87	0.677766	4.50023e-54	-0.169264	3.58073e-06
CL9846.Contig1_All	46.64	25.78	55.62	18.3	13.27	14.79	5.62	11.23	9.14	20.2	41.07	44.29	-1.46187	0	-2.28603	0	-0.268923	9.67002e-28	-0.824157	1.339e-73	1.19295	0	2.01711	0
CL9870.Contig1_All	26.61	15.63	34.96	14.76	8.33	6.82	14.35	11.5	13.02	26.91	39.7	37.77	-1.36308	0	-0.982867	1.14174e-209	0.441646	3.10427e-71	0.380217	3.51611e-21	1.80473	0	1.42451	0
CL9883.Contig1_All	16.22	12.6	13	10.24	23.83	16.84	5.22	16.16	12.37	3.68	7.38	5.34	0.286168	9.20275e-13	-0.293178	3.60184e-11	-1.34213	3.09909e-139	-0.579347	5.1706e-42	-1.6283	2.17114e-225	-1.04895	2.53589e-77
CL9900.Contig9_All	6.17	11.11	6.03	12.83	21.34	11.95	9.35	12.36	17.3	3.87	7.22	7.78	0.987522	1.3184e-90	0.754485	1.7852e-49	-0.294481	5.60228e-07	-0.233037	3.27084e-08	-1.282	4.5998e-138	-1.04897	1.93883e-85
CL9911.Contig4_All	206.68	104.75	191.27	140.97	96.37	96.82	27.18	121.68	98.2	59.69	40.73	53.25	-0.585769	0	-1.01131	0	-1.70418	0	-0.425542	3.27329e-271	-1.11841	0	-0.692872	0
CL9926.Contig3_All	11.55	7.91	9.06	16.16	17.66	17.24	12.96	13.83	12.78	3.09	9.13	12.18	0.845632	4.93305e-50	0.490318	4.00791e-16	-0.206612	0.000797044	-0.355313	7.13462e-12	-1.05224	4.53888e-72	-0.696931	6.98034e-29
CL9940.Contig4_All	12.04	12.32	15.85	9.86	12.35	8.25	23.9	18.9	15.81	15.22	22.61	28.83	-0.394782	7.82801e-12	0.560281	9.49623e-30	0.744706	5.95162e-55	0.955063	2.14831e-72	1.13949	1.79408e-110	0.184425	8.88679e-06
CL9942.Contig3_All	26.24	22.27	8.69	22.52	20.06	17.07	5.55	10.06	8.69	8.71	14.34	13.29	0.0636932	0.0105907	-1.22443	2.04645e-238	-0.647931	1.79969e-83	-1.28812	4.29014e-269	-0.711624	9.23439e-103	0.576497	6.10426e-44
CL9959.Contig2_All	11.33	14.77	9.52	21.81	19.03	20.83	9.58	14.34	18.73	8.17	9.12	11.1	0.798337	8.73195e-42	0.281651	6.24695e-06	-0.308142	5.96499e-06	-0.516686	3.38631e-20	-1.10648	1.48075e-71	-0.589793	2.62381e-18
CL996.Contig19_All	11.12	22.61	8.43	11.88	17.61	17.64	8.85	10.46	9.2	2.1	6.29	4.17	0.162304	3.14099e-06	-0.55473	5.98789e-42	-1.7416	1.61454e-266	-0.717034	1.43499e-72	-1.9039	0	-1.18687	8.66864e-103
CL9988.Contig4_All	71.77	66.09	54.26	61.12	47.2	35	45.55	52.35	78.71	79.93	116.18	148.36	-0.418154	1.45398e-83	-0.110771	3.57168e-08	0.852766	0	0.307383	4.22544e-44	1.27092	0	0.963537	0
CL999.Contig3_All	2.29	5.75	7.42	12.67	7.9	3.51	14.43	9.74	11.17	10.16	22.23	22.92	0.643241	1.79281e-35	1.19772	9.41353e-143	1.84507	0	0.554474	1.77322e-39	1.20183	4.4761e-226	0.647352	2.97487e-80
CL9992.Contig4_All	15.42	10.88	15.43	28.65	28.63	29.71	18.11	41.26	34.4	2.01	3.73	2.2	1.06222	0	1.17987	0	-2.38975	0	0.11765	1.90832e-07	-3.45197	0	-3.56962	0
CL9997.Contig2_All	15.42	41.68	17.49	14.6	35.31	34.18	39.24	19.41	12.36	4.61	12.54	9	0.175156	1.41458e-07	-0.0606885	0.0291075	-1.50245	6.33469e-240	-0.235845	5.42651e-12	-1.6776	0	-1.44176	1.29058e-215
CL9999.Contig4_All	12.18	14.28	14.79	21.38	17.06	14.04	28.92	20.99	25.66	8.09	14.68	14.95	0.352124	2.41197e-18	0.8826	5.58798e-126	-0.119524	0.00202476	0.530476	2.28893e-52	-0.471648	9.47304e-31	-1.00212	3.38976e-156
Unigene10045_All	22.86	28.7	11.65	54.46	33.36	41.27	26.52	37.55	45.37	8.75	19.51	32.84	1.03492	5.62472e-242	0.805174	1.4705e-135	-0.0352528	0.0866191	-0.229748	2.15921e-17	-1.07018	3.6982e-257	-0.840427	1.6853e-146
Unigene10129_All	18.13	35.82	24.78	58.83	48.59	21.79	132.12	63.24	66.71	63.51	132.37	176.72	0.719251	3.70629e-168	1.74133	0	2.25255	0	1.02208	0	1.5333	0	0.511223	8.1268e-264
Unigene10283_All	12.03	9.72	11.63	6.55	8.52	7.73	6.85	10.7	10.39	14.68	18.96	17.86	-0.547865	1.14611e-36	-0.246937	1.18533e-09	0.631761	5.08029e-72	0.300927	1.9617e-11	1.17963	2.22714e-204	0.878698	6.83e-126
Unigene1044_All	17.64	40.57	18.88	6.77	15.03	20.88	21.42	12.74	8.06	5.33	7.62	7.08	-0.851798	1.4263e-136	-0.861006	1.26382e-138	-1.9371	0	-0.00920771	0.203687	-1.0853	1.43706e-114	-1.07609	1.42437e-111
Unigene10499_All	17.11	14.08	13.86	7.74	4.2	7.5	1.72	2.59	3.01	12.18	17.81	19.11	-1.20884	4.04652e-155	-2.61146	0	0.132461	8.60152e-05	-1.40262	7.9732e-85	1.3413	7.4068e-201	2.74392	0
Unigene10527_All	55.18	60.54	74.23	145.16	73.24	73.63	142.47	113.91	145.48	46.52	87.89	89.34	0.626962	1.51235e-189	1.09507	0	0.249895	3.08394e-28	0.468104	5.86572e-154	-0.377067	1.32192e-76	-0.845171	0
Unigene1061_All	6.04	8.08	4.02	9.5	7.21	5.12	17.66	7.52	16.67	12.05	17.78	25.48	0.272022	1.93063e-05	1.21378	5.30151e-102	1.62053	1.98415e-209	0.941761	6.19668e-68	1.34851	5.09581e-160	0.406744	1.03163e-21
Unigene10660_All	11.27	13.27	9.48	6.21	8.58	5.04	23.65	14.93	20.64	11.96	20.94	33.62	-0.777867	2.06662e-198	0.800141	0	0.971567	0	1.57801	0	1.74943	0	0.171426	5.11254e-25
Unigene1070_All	13.34	8.46	9.32	21.52	21.22	20.77	7.11	14.09	19.2	2.43	5.54	6.29	1.03147	3.17201e-270	0.384755	1.46773e-31	-1.12062	6.2585e-153	-0.646715	1.14883e-121	-2.15209	0	-1.50537	0
Unigene10708_All	66.16	34.7	71.79	14.73	25.53	25.05	9.49	17.25	14.96	18.71	31.02	16.69	-1.40259	0	-2.04145	0	-1.37644	0	-0.638866	1.14393e-192	0.0261498	0.0295362	0.665016	6.0967e-212
Unigene10725_All	9.35	9.77	12.14	9.18	8.69	9.01	17.71	14.16	13.12	14.32	21.93	20.47	-0.216054	5.71359e-09	0.530598	2.27656e-57	0.864401	6.06175e-169	0.746652	1.12069e-103	1.08046	2.65177e-244	0.333804	1.08465e-31
Unigene10852_All	17.93	16.28	23.26	12.26	5.88	7.32	17.75	14.17	15.08	26.51	55.98	50.87	-1.16975	6.89088e-209	-0.282656	3.21396e-18	1.22145	0	0.887098	3.61389e-109	2.39121	0	1.50411	0
Unigene10988_All	95.3	64.18	112.41	38.56	26.22	50.61	19.63	38.34	33.02	70.95	108.14	66.52	-1.23399	0	-1.56803	0	-0.142218	1.86722e-25	-0.334042	7.35194e-53	1.09177	0	1.42581	0
Unigene11360_All	522.86	657.71	779.64	26.82	43.87	12.73	2.67	3.63	3.02	44.01	26.54	50.4	-4.55251	0	-7.70724	0	-4.01126	0	-3.15473	0	0.541251	7.12212e-128	3.69598	0
Unigene11559_All	715.31	1405.06	928.1	687.93	362.06	256.37	164.69	502.12	354.53	1135.93	1572.69	1938.76	-1.21735	0	-1.5618	0	0.617449	0	-0.344447	0	1.8348	0	2.17925	0
Unigene11653_All	27.93	16.43	33.8	10.63	6.05	6.92	4.09	10	7.62	19.62	35.07	12.36	-1.72399	0	-1.8362	0	-0.218596	1.1333e-19	-0.112207	0.00354225	1.5054	0	1.61761	0
Unigene11709_All	425.7	173.91	573.12	141.96	48.08	118.47	53.22	116.94	141.98	213.44	344.29	376.41	-1.92242	0	-1.89958	0	-0.321816	0	0.0228335	0.0208971	1.6006	0	1.57777	0
Unigene11987_All	8.82	14.85	5.53	12.71	15.61	17.58	9.27	9.12	16.56	2.56	6.44	6.11	0.654951	2.83366e-48	0.267693	1.40247e-08	-0.940787	2.34415e-57	-0.387259	1.44629e-19	-1.59574	2.31319e-202	-1.20848	7.68177e-102
Unigene11995_All	37.42	41.83	27.93	37.17	49.81	65	22.71	33.13	41.74	8.01	23.43	16.09	0.505369	1.00347e-138	-0.126295	1.16117e-08	-1.16752	0	-0.631664	1.39064e-205	-1.67289	0	-1.04122	0
Unigene1203_All	83.42	50.6	65.25	62.43	52.17	34.11	30.41	30.01	56.98	28.73	37.9	29.83	-0.417631	3.18541e-93	-0.754215	1.80301e-266	-1.03893	0	-0.336584	2.77283e-47	-0.621303	4.17919e-144	-0.284719	2.65463e-28
Unigene12311_All	357.17	551.94	293.02	229.25	188.01	163.26	40.4	118.6	98.94	233.17	308.62	354.64	-1.0467	0	-2.20647	0	-0.415535	0	-1.15977	0	0.631166	0	1.79093	0
Unigene12460_All	30.04	20.21	33.89	26	18.57	21.45	26.75	49.05	53.77	10.09	16.79	7.65	-0.347582	2.83236e-68	0.630446	0	-1.28344	0	0.978029	0	-0.935861	0	-1.91389	0
Unigene12485_All	15	13.56	11.56	11.21	16.62	14.75	6.05	11.69	10.6	3.86	6.98	4.67	0.0870074	0.000727975	-0.492238	8.58084e-57	-1.36725	0	-0.579245	4.22743e-80	-1.45426	0	-0.875016	1.49873e-110
Unigene1261_All	106.2	207.38	66.3	100.7	289.68	225.91	66.71	146.92	78.77	38.41	59.85	83.59	0.699344	0	-0.361795	2.83544e-134	-1.05277	0	-1.06114	0	-1.75212	0	-0.69098	0
Unigene1263_All	30.99	45.07	12.2	33.44	72.39	51.44	22.6	26.14	23.82	7.98	14.88	16.72	0.835348	6.71159e-247	-0.271113	2.31557e-19	-1.14726	1.06311e-235	-1.10646	0	-1.98261	0	-0.876147	1.95164e-125
Unigene12731_All	26.74	25.06	37.9	3.5	1.68	3.47	2.45	2.34	2.76	27.96	50.09	30.96	-3.37028	0	-3.5644	0	0.286436	1.62266e-34	-0.194125	0.006361	3.65672	0	3.85084	0
Unigene12912_All	20.26	12.82	15.88	13.21	15.99	17.77	4.33	10.75	10.42	6.63	11.19	6.42	-0.0580113	0.0185081	-0.929393	7.5886e-150	-1.01025	1.71934e-173	-0.871382	4.39573e-129	-0.952242	1.51538e-151	-0.0808603	0.0167153
Unigene12930_All	3.53	8.18	5.63	10.98	14.86	9.15	18.4	16.4	18.28	5.84	11.81	12.02	1.01641	2.4481e-84	1.62361	4.34521e-261	0.783912	1.83546e-47	0.607199	3.1147e-53	-0.232498	8.12367e-08	-0.839696	3.16203e-93
Unigene1367_All	13.37	12.79	12.64	19.64	11.95	13.29	47.55	35.39	22.99	20.99	22.4	21.92	0.216099	8.50748e-06	1.46416	1.4555e-283	0.763097	2.05674e-62	1.24806	5.12406e-222	0.546998	1.05238e-35	-0.701064	2.41274e-86
Unigene13670_All	98.01	151.33	79.77	60.95	63.66	74.78	43.59	50.35	56.79	52.7	109.64	84.84	-0.719455	0	-1.11361	0	-0.403048	1.59661e-114	-0.394157	1.07123e-66	0.316408	2.84368e-56	0.710564	5.44843e-239
Unigene13691_All	10.39	22.85	22.09	22.69	23.93	21.22	49	41.6	30.25	18.66	13.59	17.89	0.295936	5.11398e-27	1.13341	0	-0.136452	1.63327e-06	0.837473	2.8237e-299	-0.432389	9.63775e-54	-1.26986	0
Unigene13784_All	14.36	18.87	14.04	12.93	22.77	18.56	4.18	18.3	13.56	4.05	3.18	6.07	0.200694	1.27026e-08	-0.375494	3.0789e-21	-1.8191	1.28091e-280	-0.576188	1.12283e-50	-2.01979	0	-1.4436	2.73666e-155
Unigene1389_All	32	42.54	22.88	35.25	39.85	45.5	24.95	27.63	29.7	10.24	16.11	21.48	0.309885	1.19835e-49	-0.23601	1.00533e-24	-1.01939	0	-0.545896	6.55169e-138	-1.32927	0	-0.783375	6.78517e-180
Unigene14015_All	9.22	19.71	10.29	15.44	18.73	11.89	14.5	16.08	18.74	19.08	30.78	30.59	0.233885	1.44403e-12	0.338017	5.66194e-25	1.04236	1.87574e-285	0.104132	0.00038658	0.808478	4.80485e-187	0.704346	9.05192e-147
Unigene14191_All	5.31	7.91	6.34	16.27	15.66	16.08	13.32	11.93	10.31	4.63	7.7	10.57	1.29893	5.76084e-133	0.874565	5.78628e-53	0.23916	6.02648e-05	-0.42437	1.08833e-20	-1.05977	1.55415e-97	-0.635405	2.35701e-31
Unigene1431_All	143.6	71.09	161	52.02	20.74	27.52	52.91	47.76	61.28	139.75	233.25	209.87	-1.8993	0	-1.20109	0	0.645041	0	0.698214	6.74666e-144	2.54434	0	1.84613	0
Unigene1432_All	131.49	79.31	168.77	69.37	23.27	32.58	50.15	44.9	57.93	152.43	252.63	242.4	-1.59334	0	-1.2982	0	0.782073	0	0.29514	1.75528e-29	2.37541	0	2.08027	0
Unigene1436_All	16.23	15.49	16.4	11.16	16.4	17.06	2.89	11.13	9.52	5.25	5.01	2.47	-0.106188	0.00441063	-1.01407	5.4618e-92	-1.91185	6.26171e-239	-0.90788	2.54954e-71	-1.80566	7.11289e-206	-0.89778	1.75194e-38
Unigene1439_All	66.76	108.71	67.74	170.37	122.81	139.6	107.98	141.82	119.93	35.2	64.45	107.32	0.837338	0	0.624179	2.49457e-193	-0.213638	7.42768e-19	-0.213158	1.32225e-31	-1.05098	0	-0.837818	0
Unigene14397_All	46.78	37.16	28.73	31.39	24.49	14.71	75.36	44.89	100.48	60.78	61.42	79.43	-0.671275	4.69914e-238	0.972747	0	0.845209	0	1.64402	0	1.51648	0	-0.127538	4.06496e-22
Unigene14417_All	16.38	13.24	18.07	20.85	30.5	23.55	15	19.33	17.11	2.18	5.33	5.39	0.654153	1.21842e-73	0.121926	0.000840409	-1.87518	4.22044e-249	-0.532227	3.78298e-51	-2.52933	0	-1.9971	3.03503e-293
Unigene14501_All	11.81	9.74	12.78	13.59	15.75	16.37	4.64	11.19	10.13	3.34	7.73	4.82	0.413785	9.20341e-68	-0.394764	4.90763e-47	-1.10958	2.15522e-283	-0.808549	1.72914e-220	-1.52336	0	-0.714814	2.86841e-103
Unigene14526_All	15.41	10.32	12.35	70.84	137.91	108.42	87.11	128.83	116.31	0.66	2.96	2.14	3.05929	0	3.13489	0	-2.72066	0	0.0755985	3.15748e-10	-5.77995	0	-5.85555	0
Unigene14945_All	21.78	19.81	24.35	14.62	7.87	8.42	21.72	20.55	33.1	14.77	35.51	31.71	-1.09026	0	0.193939	1.18224e-63	0.315531	3.2951e-174	1.28419	0	1.40579	0	0.121592	3.92188e-29
Unigene14954_All	12.97	19.15	12.55	20.51	22.22	12.7	26.7	25.47	24.69	12.11	11.81	9.5	0.312421	3.52239e-69	0.78576	0	-0.41681	1.4533e-95	0.473339	5.73488e-204	-0.729231	0	-1.20257	0
Unigene14958_All	5.61	5.8	5.91	14.58	11.32	8.99	31.23	13.29	17.18	5.73	9.01	14.03	1.01299	9.07069e-151	1.83319	0	0.73759	4.52521e-74	0.820201	2.98536e-185	-0.275398	1.78867e-16	-1.0956	1.79936e-301
Unigene15301_All	13.22	11.13	8.49	12.4	17.65	15.18	6.79	9.97	14.73	3.98	6.9	6.97	0.463985	2.35906e-29	-0.0503942	0.0806168	-0.870845	2.78985e-63	-0.514379	7.05089e-35	-1.33483	1.55461e-171	-0.820451	3.53898e-55
Unigene15478_All	9.11	8.23	4.5	22.99	18.93	13	14.06	19.99	23.68	4.69	6.56	7.36	1.33389	1.99563e-226	1.41224	1.01972e-259	-0.223146	1.51524e-05	0.0783516	0.00570037	-1.55703	6.17095e-287	-1.63538	0
Unigene15584_All	22.58	19.54	21.73	39.09	27.33	23.97	17.77	23.81	22.77	9.65	16.3	15.67	0.50513	2.4234e-95	0.0201073	0.129636	-0.611607	1.54289e-95	-0.485023	3.52076e-88	-1.11674	0	-0.631714	4.76713e-102
Unigene15595_All	6.05	6.74	6.8	13.54	10.1	7.11	17.99	16.59	15.41	6.09	9.71	14.36	0.655215	1.59098e-31	1.36256	2.05203e-165	0.633969	1.11587e-29	0.70734	5.40361e-57	-0.0212461	0.10599	-0.728587	2.18088e-60
Unigene1563_All	11.63	18.31	15.74	31.45	17.73	19.02	59	36.01	38.64	15.61	25.67	33.37	0.583866	1.11587e-43	1.56097	0	0.722058	1.93576e-69	0.9771	2.8534e-202	0.138192	4.33488e-05	-0.838908	7.22205e-158
Unigene15650_All	25	22.67	25.28	30.2	20.54	13.93	10.26	13.15	12.36	8.74	18.37	14.25	-0.168527	5.96964e-07	-1.01495	3.59405e-140	-0.809098	3.78788e-97	-0.846419	2.31446e-92	-0.640571	1.69446e-58	0.205848	3.60907e-06
Unigene15656_All	79.65	67.64	126.09	44.63	35.26	34.59	32.29	27.75	35.64	83.63	137.39	71.81	-1.25337	0	-1.50997	0	0.101939	3.06696e-18	-0.2566	1.13376e-39	1.35531	0	1.61191	0
Unigene15758_All	27.71	9.67	28.69	15.07	6.58	19.78	4.15	8.05	7.12	11.8	25.46	12.43	-0.668948	1.94951e-60	-1.75836	7.74771e-279	-0.402754	2.27125e-25	-1.08941	6.85046e-86	0.266194	2.88551e-10	1.3556	1.1498e-145
Unigene15777_All	39.57	32.65	54.5	64.12	39.3	16.68	106.76	39.93	66.23	84.55	133.81	195.19	-0.0731888	2.30579e-05	0.749154	0	1.71275	0	0.822343	0	1.78594	0	0.963595	0
Unigene1588_All	10.69	15.23	8.56	18.11	27.81	22.14	12.01	14.53	19.37	6.1	8.04	10.3	0.984079	2.09455e-123	0.425062	1.82494e-20	-0.485577	8.03848e-20	-0.559017	4.9997e-47	-1.46966	1.16814e-232	-0.910639	1.85778e-74
Unigene1605_All	17.62	14.43	14.88	13	23.65	20.45	6.62	15.04	16.02	6.17	11.7	6.65	0.284389	2.52136e-18	-0.304971	3.10218e-17	-0.931466	1.57172e-118	-0.589361	4.00663e-65	-1.21586	1.72159e-221	-0.626495	3.88631e-49
Unigene1613_All	13.43	16.04	10.98	11.21	20.16	17.39	5.17	10.38	8.51	4.4	8.43	7.76	0.270172	8.32173e-20	-0.738767	3.67317e-96	-0.969546	2.85179e-153	-1.00894	8.47983e-195	-1.23972	5.89458e-274	-0.230779	1.74565e-08
Unigene1615_All	30	37.6	21.84	37.72	54.38	59.97	36.46	51.8	59.82	10.28	17.51	18.1	0.766807	0	0.735135	0	-0.957568	0	-0.0316727	0.0167018	-1.72438	0	-1.6927	0
Unigene1616_All	33.68	42.46	16.21	60.76	81.32	69.18	15.89	47.72	68.13	13.52	15.61	23.47	1.19656	0	0.525184	1.87202e-91	-0.802014	4.63261e-135	-0.671373	2.45245e-223	-1.99857	0	-1.3272	0
Unigene1629_All	18.73	23	17.62	6.14	6.61	5.53	3.72	6.89	8.26	18.71	28.44	35.26	-1.69657	0	-1.64343	0	0.481056	5.88642e-69	0.0531429	0.0892924	2.17762	0	2.12448	0
Unigene16457_All	30.7	17.95	35.91	6.11	6.65	7.03	3.1	7.22	4.7	16.34	19.12	23.38	-2.09191	0	-2.47737	0	-0.513313	9.29651e-55	-0.385462	4.69056e-09	1.57859	2.79969e-244	1.96405	0
Unigene1649_All	23.92	34.93	24.46	64.54	36.34	42.2	23.51	42.17	39.31	9.95	23.43	30.56	0.785437	2.62242e-155	0.349578	6.93609e-28	-0.368294	1.11446e-24	-0.435859	7.371e-55	-1.15373	2.59473e-295	-0.717872	5.1011e-99
Unigene16586_All	22.5	23.12	23.39	54.74	52.84	78.15	43.6	33.22	30.23	8.03	10.79	11.16	1.43069	0	0.640816	2.61222e-137	-1.19565	8.32525e-254	-0.789873	0	-2.62633	0	-1.83646	0
Unigene1660_All	14.44	17.78	24.46	32	18.35	23.52	38.91	49.66	46.17	22.75	59.95	50.45	0.387816	1.16937e-22	1.2652	2.42057e-301	1.24479	2.61567e-292	0.877381	3.49384e-166	0.856976	1.6464e-159	-0.0204043	0.116688
Unigene1661_All	48.56	32.53	56.98	48.65	40.86	28.44	51.99	87.83	80.22	60.15	127.21	92.67	-0.220827	2.83883e-13	0.691399	5.19355e-155	1.03368	0	0.912226	1.59589e-248	1.25451	0	0.342284	7.98946e-56
Unigene1662_All	26.25	21.59	14.37	33.17	36.2	34.52	8.96	22.66	26.11	7.35	10.92	10.23	0.74432	3.532e-96	-0.0912062	0.00981829	-1.11437	1.33167e-113	-0.835526	1.99816e-116	-1.85869	0	-1.02316	1.01299e-92
Unigene16638_All	11.16	12.91	11.08	22.84	15.19	12.78	12.52	14.06	18.01	4.72	9.58	7.54	0.537558	1.75486e-27	0.35772	1.81993e-12	-0.674096	1.41147e-28	-0.179837	5.14266e-05	-1.21165	6.9412e-106	-1.03182	3.06767e-72
Unigene1666_All	15.39	13.44	17.28	12.45	14.69	13.76	8.32	16.45	15.59	4.28	10.37	7.28	-0.170661	1.29772e-06	-0.180264	4.0476e-07	-1.06578	7.0233e-140	-0.0096032	0.199622	-0.895118	6.78788e-94	-0.885515	5.76266e-91
Unigene1667_All	15.53	13.84	11.28	16.41	24.95	20.47	11.66	17.64	11.81	4.91	9.01	6.85	0.610036	1.0388e-33	0.0366764	0.145645	-0.954922	1.38661e-47	-0.573359	3.37703e-30	-1.56496	1.04395e-153	-0.991598	1.55576e-51
Unigene1679_All	45.87	24.93	36.05	29.23	17.87	15.63	11.4	14.59	24.59	14.04	27.28	43.96	-0.763904	7.90681e-194	-1.07073	0	-0.316062	1.65118e-40	-0.30683	4.36328e-23	0.447842	1.23909e-61	0.754672	4.45061e-153
Unigene1683_All	10	11.56	8.25	14.02	18.12	14.15	8.16	11.53	12.6	4.03	9.3	9.02	0.640405	1.0022e-28	0.133235	0.0121378	-0.400201	2.86429e-09	-0.50717	2.09062e-19	-1.04061	2.51023e-64	-0.533436	1.54477e-15
Unigene1691_All	10.81	10.95	13.98	21.79	9.72	11.42	24.16	20.69	28.37	11.49	18.59	24.15	0.271002	1.40616e-07	1.0489	2.58558e-114	0.616321	1.18016e-35	0.777899	1.27504e-69	0.345319	8.42441e-14	-0.43258	1.08585e-25
Unigene16914_All	15.51	10.18	11.51	25.26	9.41	26.98	31.24	31.09	33.57	13.62	35.88	50.2	0.733098	1.41746e-89	1.37605	0	1.43266	0	0.642955	5.1945e-110	0.69956	3.22167e-134	0.0566045	0.00816581
Unigene1693_All	38.37	62.09	40.2	82.74	65.29	55.16	28.36	73.92	90.51	24.27	24.94	37.71	0.53494	9.36556e-128	0.469005	4.05472e-96	-0.683406	2.07075e-137	-0.0659347	0.00053605	-1.21835	0	-1.15241	0
Unigene16946_All	16.16	9.73	9.87	6	11.49	11.24	3.05	9.99	5.09	12.27	14.55	34.09	-0.314689	1.67773e-17	-0.964864	6.56651e-119	0.777527	3.10282e-142	-0.650175	2.22801e-49	1.09222	1.76844e-250	1.74239	0
Unigene1706_All	15.07	22.71	19.67	36.01	21.55	21.52	45.07	43.18	30.4	16.49	24.39	35.94	0.466898	1.29135e-32	1.06209	4.59848e-197	0.433647	2.49487e-28	0.59519	1.06695e-73	-0.0332506	0.0594555	-0.628441	1.21041e-81
Unigene1741_All	111.97	37.03	141.04	17.82	13.66	22.02	6.87	27.29	22.34	66.87	90.1	66.57	-2.43516	0	-2.3433	0	-0.367872	1.52851e-103	0.0918641	0.00443697	2.06729	0	1.97542	0
Unigene1753_All	11.57	8.74	13.41	17.62	12.18	11.35	11.69	19.95	17.57	4.48	6.27	7.4	0.291931	6.63288e-11	0.559111	3.60133e-38	-0.884285	1.59012e-57	0.26718	5.34496e-11	-1.17622	4.8158e-111	-1.4434	4.55777e-181
Unigene1754_All	11.67	14.49	10.24	17.75	23.79	15.78	12.24	13.92	17.04	5	10.11	8.37	0.660021	2.39136e-43	0.261732	1.78199e-07	-0.6205	1.2978e-25	-0.398289	2.60601e-18	-1.28052	6.08282e-129	-0.882232	4.57734e-54
Unigene17542_All	5.29	8.17	6.89	11.47	7.95	10.81	26.68	17.89	13.13	10.17	20.46	18.36	0.5764	2.24954e-17	1.51955	5.46058e-151	1.28191	1.62734e-100	0.943151	8.29434e-72	0.705507	1.14196e-38	-0.237643	1.39622e-07
Unigene17628_All	21.79	13.22	11.92	69.45	86.28	73.8	94.59	90.52	94.14	3.86	9.23	6.55	2.29278	0	2.58159	0	-1.25042	4.69046e-187	0.288809	2.13389e-83	-3.5432	0	-3.83201	0
Unigene17925_All	50.45	17.73	76.49	19.92	5.4	13.58	5.09	22.16	22.25	19.2	29.76	30.62	-1.891	0	-1.53751	0	-0.859492	0	0.35349	9.9852e-56	1.03151	0	0.678016	1.05878e-287
Unigene1794_All	47.33	48.07	47.07	17.82	18.18	17.23	6.98	14.14	14.73	15.7	35.52	32.44	-1.41374	3.15393e-255	-1.96864	0	-0.749571	5.10555e-92	-0.554903	1.87845e-21	0.664169	1.5431e-45	1.21907	7.19911e-122
Unigene17940_All	24.68	17.51	21.09	13.86	10.09	21.38	42.26	29.22	23.24	12.6	16.36	22.31	-0.478027	3.35182e-40	0.591206	1.43366e-86	-0.293719	1.83193e-17	1.06923	1.82071e-236	0.184308	2.71866e-07	-0.884926	2.89136e-174
Unigene18024_All	91.66	88.38	168.3	46.74	37.33	47.1	115.95	60.82	96.63	126.96	232.27	209.1	-1.40441	0	-0.339411	5.24155e-85	0.717491	0	1.065	0	2.1219	0	1.0569	0
Unigene18336_All	7.71	9.86	14.89	5.99	4.15	4.11	6.1	6.23	4.61	16.82	21	26.32	-1.18488	9.90151e-158	-0.931823	1.01803e-106	0.988321	1.25374e-233	0.253058	6.22009e-07	2.1732	0	1.92014	0
Unigene18951_All	31.25	11.14	18.59	20.32	36.76	26.28	20.3	25.67	45.33	7.89	3.57	4	0.452644	3.32978e-76	0.589276	1.27067e-133	-1.9747	0	0.136631	4.20331e-10	-2.42735	0	-2.56398	0
Unigene18999_All	14.76	23.82	10.23	9.74	3.08	8.58	17.85	14.72	14.62	12.79	9.08	5.27	-1.18562	1.71855e-171	-0.0410611	0.07356	-0.842266	7.28916e-99	1.14456	6.76906e-157	0.343351	7.55048e-13	-0.801205	5.25953e-88
Unigene1920_All	831.75	766.81	897.24	157.21	59.01	132.84	20.69	51.67	37.46	576.55	701.47	741.03	-2.83369	0	-4.49206	0	-0.298297	0	-1.65837	0	2.53539	0	4.19376	0
Unigene19240_All	16.64	6.77	15.4	11.18	8.74	6.08	10.38	11.67	13.59	14.34	22.7	16.36	-0.574766	3.06278e-73	-0.117157	3.06183e-05	0.46388	5.67257e-69	0.457608	4.64365e-45	1.03865	9.59025e-278	0.581038	1.71489e-102
Unigene19343_All	14.36	23.44	7.51	11.49	40.51	28.51	5.87	19.89	14.04	4.15	6.32	9.75	0.829358	2.82885e-178	-0.172731	3.42735e-07	-1.15679	2.5242e-175	-1.00209	2.47736e-243	-1.98614	0	-0.984055	1.44599e-119
Unigene19448_All	11.5	11.62	14.47	23.18	12.61	11.97	55.38	36.26	31.35	21.47	50.5	48.24	0.351256	2.53139e-13	1.72305	0	1.68989	0	1.3718	0	1.33863	2.69009e-303	-0.0331642	0.0657167
Unigene19800_All	11.33	14.42	8.74	14.27	12.89	11.55	14.79	15.79	14.44	4.44	4.33	9.78	0.169742	2.01674e-06	0.39292	2.00574e-28	-0.885706	2.04585e-89	0.223177	6.49324e-11	-1.05545	5.688e-134	-1.27863	4.07379e-210
Unigene19818_All	37.46	21.19	52.15	18.96	11.7	10.07	10.6	11.73	17.17	30.6	43.88	46.9	-1.43965	0	-1.48083	0	0.138111	1.41175e-11	-0.0411811	0.070413	1.57776	0	1.61894	0
Unigene19863_All	76.83	55.3	101.48	6	3.12	4.1	1.96	1.82	3.01	51.04	61.13	90.33	-4.13747	0	-5.0927	0	-0.191971	8.29827e-19	-0.955237	7.32599e-20	3.9455	0	4.90073	0
Unigene199_All	12.17	12.59	8.48	13.08	18.36	15.58	7.53	8.12	15.11	4.33	9.34	8.04	0.503485	4.98274e-28	-0.101339	0.0162237	-0.60459	8.46957e-28	-0.604824	4.09833e-38	-1.10807	1.27448e-105	-0.503251	3.978e-19
Unigene20009_All	36.45	41.65	44.97	12.66	5.7	5.41	4.71	7.07	6.86	18.09	25.73	37.31	-2.36736	0	-2.71358	0	-0.593873	3.81106e-157	-0.346228	7.40475e-13	1.77348	0	2.11971	0
Unigene20063_All	6.26	13.09	9.73	38.92	56.9	40.82	50.62	40.8	59.54	3.88	3	1.58	2.23304	0	2.38	0	-1.77726	2.47986e-282	0.146962	3.35922e-19	-4.0103	0	-4.15726	0
Unigene20467_All	94.22	48.13	99.31	36.97	25.47	42.98	5.83	25.93	22.38	28	44.77	30.63	-1.19381	0	-2.14367	0	-1.21897	0	-0.949867	2.92829e-272	-0.0251589	0.0455823	0.924708	1.42398e-257
Unigene20512_All	16.54	8.15	20.12	8.99	7.8	9.48	4.05	7.32	7.9	7.77	12.56	12.99	-0.767931	2.47942e-83	-1.20718	2.43259e-174	-0.420767	1.08368e-29	-0.439247	2.66978e-19	0.347164	1.15519e-16	0.786411	2.04054e-65
Unigene20538_All	35.86	19.98	45.77	12.96	8.45	12.28	4.98	14.85	11.51	19.61	32.14	23.34	-1.59002	0	-1.68442	0	-0.431533	3.43643e-80	-0.0944001	0.00417904	1.15849	0	1.25289	0
Unigene20609_All	191.25	302.01	117.08	383.04	313.12	292.1	106.97	297.58	175.57	56.36	108.5	199.05	0.699868	0	-0.0539199	1.17038e-05	-0.731097	0	-0.753788	0	-1.43096	0	-0.677177	0
Unigene20659_All	726.78	303.62	965.65	403.48	102.06	299.34	104.97	364.01	336.06	332.01	528.66	452.72	-1.306	0	-1.29838	0	-0.599391	0	0.00761465	0.0786374	0.706605	0	0.69899	0
Unigene20679_All	43.94	26.34	49.56	54.08	61.88	62.93	67.63	81.69	70.1	19.93	33.67	31.35	0.580217	9.03446e-198	0.882191	0	-0.489841	8.76135e-99	0.301974	1.92095e-73	-1.07006	0	-1.37203	0
Unigene20696_All	73.97	152.51	57.86	7.01	9.47	16.71	0.72	2.62	3.1	5.71	12.6	21.65	-3.09829	0	-5.45315	0	-2.82432	0	-2.35486	0	0.273969	3.10742e-20	2.62883	0
Unigene20715_All	22.7	33.86	27.61	86.07	110.53	142.28	73.92	81.12	126.75	4.16	4.05	10.16	2.01108	0	1.75092	0	-2.18595	0	-0.26016	2.43262e-82	-4.19703	0	-3.93687	0
Unigene20777_All	408.54	517.92	504.03	337.07	294.64	277.65	104.73	320.37	210.1	354.83	464.33	452.54	-0.649925	0	-1.15481	0	-0.161486	3.70672e-110	-0.504881	0	0.488439	0	0.99332	0
Unigene20797_All	12.84	5	9.19	31.87	28.47	25.27	7.81	32.39	22.06	0.38	1.74	1.37	1.66666	0	1.21859	4.34992e-289	-2.94644	0	-0.448072	8.39109e-71	-4.6131	0	-4.16503	0
Unigene21_All	34.26	29.4	33.16	6.07	7.79	10.37	1.92	6.13	7.35	4.94	2.35	4.14	-1.99699	0	-2.64123	0	-3.07719	0	-0.644238	1.99364e-42	-1.0802	2.04816e-101	-0.435962	8.99863e-15
Unigene21045_All	41.03	29.37	41.42	4.75	2.1	3.39	1.66	2.36	3.38	32.51	64.01	50.74	-3.4438	0	-3.90909	0	0.40357	2.76886e-84	-0.465284	3.41012e-09	3.84737	0	4.31266	0
Unigene21364_All	37.81	18.33	47.68	6.22	4.3	7.59	5.59	9.88	7.18	24.94	39.81	24.61	-2.51636	0	-2.1852	0	-0.211905	2.13476e-21	0.331163	9.33979e-12	2.30446	0	1.9733	0
Unigene21626_All	55.55	52.2	53.89	13.05	4.84	7.84	7.34	7.19	8.66	30.14	48.41	53.2	-2.64394	0	-2.7815	0	-0.276859	1.21735e-18	-0.13756	0.0239729	2.36708	0	2.50464	0
Unigene21800_All	4.51	14.51	7.99	27.02	14.79	8.58	28.77	20.48	26.26	8.94	16.23	18.85	0.904375	2.89086e-112	1.48936	0	0.712137	2.46825e-66	0.58499	8.01985e-79	-0.192237	1.49722e-08	-0.777227	5.88051e-130
Unigene22050_All	15.79	10.74	19.84	14.1	16.53	15.05	8.56	9.09	15.37	18.06	29.74	31.38	-0.0193468	0.147526	-0.482734	3.3886e-40	0.778644	7.01491e-158	-0.463388	7.2305e-37	0.797991	7.13316e-165	1.26138	0
Unigene22067_All	11.72	11.91	9.7	21.4	21.35	15.98	11.74	17.34	14.71	4.1	9.63	7.85	0.820182	3.779e-134	0.403713	1.71773e-29	-0.621723	2.66781e-48	-0.416469	7.60367e-41	-1.4419	0	-1.02544	1.93057e-146
Unigene22290_All	8.73	10.78	9.36	14.42	18.25	16.18	11.44	18.71	21.31	7.8	7.59	5.56	0.766579	6.22168e-29	0.858876	7.84026e-37	-0.445839	5.96121e-08	0.0922968	0.0365748	-1.21242	1.39291e-60	-1.30472	2.11243e-71
Unigene22312_All	17.5	10.57	20.93	11.51	7.89	9.81	13.8	17.2	15.59	15.42	22.2	24.38	-0.743907	2.14599e-176	-0.0671047	0.00164003	0.342883	3.00715e-56	0.676802	3.03525e-142	1.08679	0	0.409988	1.88052e-77
Unigene2309_All	9.64	17.05	7.53	10.68	24.25	11.69	28.87	30.63	26.44	11.08	16.95	28.64	0.448466	4.02248e-27	1.33951	0	0.738817	3.29454e-78	0.891046	8.05693e-160	0.290351	6.02423e-16	-0.600695	8.87449e-82
Unigene23179_All	46.9	47.46	43.35	18.31	15.58	20.9	5.36	16.72	17.36	20.07	36.39	37.13	-1.32741	0	-1.79219	0	-0.551216	3.43953e-163	-0.464784	2.2831e-48	0.776192	5.04289e-204	1.24098	0
Unigene24374_All	366.76	493.84	491.46	335.89	250.44	280.49	120.51	309.17	207.79	375.19	511.85	442.92	-0.638989	0	-1.07324	0	-0.0198384	5.53972e-05	-0.434249	0	0.61915	0	1.0534	0
Unigene24408_All	286.64	246.17	383.54	316.7	192.39	211.28	358.65	372.27	419.83	422.79	580.81	558.93	-0.342366	2.2489e-264	0.340079	0	0.779211	0	0.682445	0	1.12158	0	0.439132	0
Unigene24534_All	19.59	25.89	25.02	15.91	15.45	5.53	16.14	19.34	9.21	17.16	40.26	41.94	-0.930838	2.7226e-170	-0.646462	3.59793e-91	0.502564	4.88402e-83	0.284376	2.45442e-14	1.4334	0	1.14903	0
Unigene24558_All	63.86	94.77	97.99	98.13	125.87	150.07	79.19	96.74	173.96	28.7	29.93	45.94	0.546386	1.3511e-261	0.457445	9.47825e-178	-1.28465	0	-0.0889408	7.54838e-10	-1.83104	0	-1.7421	0
Unigene24589_All	34.91	116.2	71.65	196.06	89.15	117.12	97.94	151.94	197.95	65.22	129.83	51.27	0.857385	0	1.01812	0	0.149922	9.4922e-19	0.160735	1.36729e-36	-0.707462	0	-0.868197	0
Unigene24650_All	67.01	92.41	97.75	12.53	18.54	31.98	20.18	18.36	8.27	19.84	37.55	46.09	-2.02748	0	-2.4489	0	-1.30581	0	-0.421425	4.49096e-40	0.721665	9.69097e-171	1.14309	0
Unigene24740_All	13.01	14.86	9.09	24.54	17.92	9.06	43.58	23.7	30.75	15.05	18.14	26.29	0.484	9.25195e-34	1.41415	0	0.696016	2.28865e-73	0.930147	1.9018e-193	0.212015	5.50259e-10	-0.718132	1.42515e-125
Unigene24784_All	35.63	11.29	45.45	25.78	8.75	14.68	7.35	13.85	22.26	22.47	35.61	36.17	-0.901728	1.7345e-119	-1.07258	2.90742e-158	0.0419533	0.0525944	-0.170847	0.000112915	0.943681	1.16065e-133	1.11453	4.27753e-174
Unigene25298_All	39.07	28.04	36.2	24.94	28.19	32.42	6.3	20.93	18.41	21.94	37.91	22.39	-0.267905	1.22874e-16	-1.16011	8.55063e-205	-0.319119	1.16308e-22	-0.892201	6.03166e-111	-0.0512131	0.0235507	0.840988	9.09005e-98
Unigene25304_All	8.76	9.93	14.7	2.61	11.74	9.46	6.72	6.07	5.72	10.72	24.84	14.97	-0.48842	1.45812e-38	-0.84518	1.02703e-98	0.600616	2.19287e-83	-0.35676	2.18702e-16	1.08904	2.21103e-228	1.4458	0
Unigene25328_All	23.21	14.66	18.74	27.99	29.6	24.04	22.06	23.65	20.86	6.74	19.17	8.45	0.530735	8.19724e-85	0.242526	1.79262e-17	-0.716784	1.03521e-100	-0.288209	2.59458e-28	-1.24752	0	-0.95931	1.12791e-193
Unigene25468_All	8.01	24.4	13.41	41.38	26.82	15.26	12.52	17.38	8.7	0.63	1.11	0.96	0.86997	4.30535e-137	-0.233427	1.95422e-08	-4.07797	0	-1.1034	1.4317e-201	-4.94794	0	-3.84454	0
Unigene25625_All	10.15	12.68	9.93	18.55	17.1	16.8	10.93	12.88	16.91	5.33	7.34	7.02	0.682824	6.02179e-53	0.325573	4.54391e-12	-0.724788	1.70149e-37	-0.357251	1.99574e-17	-1.40761	3.65724e-172	-1.05036	3.8027e-85
Unigene25833_All	15.13	15.41	14.41	23.72	15.25	18.5	10.97	23.29	24.55	4.62	13.35	10.45	0.357799	2.96863e-33	0.398334	3.41461e-41	-0.656375	9.98958e-77	0.0405353	0.043852	-1.01417	2.05018e-204	-1.05471	6.76579e-223
Unigene25906_All	187.97	156.15	190.55	90.51	53.85	157.83	126.87	226.21	217.36	208.18	372.63	178.59	-0.821496	0	0.100904	3.44021e-51	0.507508	0	0.9224	0	1.329	0	0.406604	0
Unigene26630_All	11.94	13.46	7.27	23.51	25.27	28.31	17.75	21.71	21.5	6.72	7.81	12.81	1.2421	1.12047e-190	0.913551	1.20667e-92	-0.245011	2.74536e-06	-0.328553	7.17412e-20	-1.48712	3.52674e-252	-1.15856	1.01189e-136
Unigene26777_All	23.02	12.4	24.46	13.68	6.97	12.98	14.28	19.46	14.93	18.45	27.39	24.62	-0.829779	1.7303e-283	-0.292293	9.26033e-44	0.237771	1.43009e-35	0.537486	5.79327e-108	1.06755	0	0.530065	2.18765e-152
Unigene26827_All	25.64	15.29	22.68	13.67	15.24	18.11	4.02	12.47	12.29	12.63	19.89	15.07	-0.432832	1.93659e-28	-1.12843	1.84416e-143	-0.409563	4.45092e-26	-0.695594	5.01527e-48	0.0232697	0.0924211	0.718864	5.75154e-52
Unigene26973_All	13.58	19.86	10.45	31.76	20.07	27.82	9.98	27.15	21.46	2.58	4.15	6.34	0.862775	6.3123e-263	0.428045	7.1078e-57	-1.74197	0	-0.43473	3.13965e-78	-2.60474	0	-2.17001	0
Unigene27_All	41.58	116.54	59.01	89.15	56.04	43.14	160.98	73.25	69.05	103.11	131.12	184.06	-0.201959	1.37007e-46	0.483561	0	0.951707	0	0.68552	0	1.15367	0	0.468146	0
Unigene27183_All	9.9	11.04	11.71	17.41	8.57	8.27	13.98	13.34	19.26	16.14	33.88	31.56	0.0751841	0.0479304	0.52486	4.20745e-26	1.33286	6.62078e-211	0.449676	4.3866e-20	1.25768	4.13997e-193	0.808001	1.4025e-93
Unigene27715_All	3.53	9.57	5.87	72.1	64.61	55.03	140.51	116.35	105.97	4.17	3.98	9.78	3.34055	0	4.26538	0	-0.0718497	0.0519237	0.924829	0	-3.4124	0	-4.33723	0
Unigene2776_All	8.24	16.67	11.74	27.86	18.35	13.87	87.19	39.52	28.83	9.44	19.41	31.09	0.717555	1.59342e-79	2.09145	0	0.720208	1.03908e-80	1.37389	0	0.00265259	0.143837	-1.37124	0
Unigene27901_All	19.82	16.91	17.03	9.68	9.38	8.48	9.2	7.85	6.56	6.34	13.35	14.49	-0.961835	2.75162e-160	-1.18012	2.36611e-222	-0.646531	3.38083e-82	-0.218288	3.30757e-07	0.315305	7.30292e-16	0.533593	4.64724e-38
Unigene27961_All	69.5	44.71	65.35	103.44	79.67	73.2	34.52	57.58	55.83	20.64	55.18	42.19	0.519327	4.00422e-113	-0.261419	2.76964e-23	-0.591991	7.44658e-101	-0.780746	1.36574e-230	-1.11132	0	-0.330573	5.95896e-30
Unigene27998_All	36.56	23.31	30.68	14.37	14.65	13.1	7.12	11.77	11.67	11.18	24.13	18.54	-1.10243	0	-1.5603	0	-0.747214	0	-0.457868	9.6762e-77	0.355217	1.25819e-62	0.813086	3.40075e-271
Unigene28645_All	10.97	11.46	13.06	7.37	4.55	3.62	8.66	3.95	4.74	12.07	21.42	19.9	-1.18818	0	-1.03396	1.11328e-247	0.591805	1.39293e-144	0.154219	2.09836e-05	1.77998	0	1.62577	0
Unigene287_All	36.71	15.18	45.17	7.88	10.03	6.4	9.21	18.61	21.88	28.81	52.79	40.2	-1.99448	0	-0.953772	1.7239e-217	0.334596	9.53846e-44	1.04071	3.88351e-130	2.32908	0	1.28837	0
Unigene28745_All	10.23	15.89	8.96	15.95	18.95	14.09	18.67	20.15	16.86	4.3	6.04	12.1	0.48587	4.13899e-25	0.680479	1.75472e-50	-0.630747	1.04021e-28	0.19461	1.65364e-06	-1.11662	1.75113e-101	-1.31123	8.30878e-148
Unigene28788_All	6.99	13.94	13.24	17.47	11.57	8.4	32.18	22.36	28.43	12.63	20.68	25.01	0.137102	0.00162498	1.28996	4.82173e-235	0.782481	1.80645e-74	1.15286	8.90669e-197	0.64538	5.8868e-54	-0.507482	2.11629e-49
Unigene29136_All	15.51	13.77	14.35	31.15	25.15	25	19.24	20.04	24.6	7.87	14.86	16.68	0.904281	2.33751e-76	0.568927	5.06466e-28	-0.128535	0.00809239	-0.335354	2.91764e-14	-1.03282	1.03693e-95	-0.697462	1.07644e-39
Unigene29138_All	36.32	17.49	48.84	4.5	5.46	6.5	2.28	3.72	4.99	17	15.81	24.72	-2.63854	0	-3.2135	0	-0.827013	9.36392e-197	-0.574964	3.6878e-18	1.81152	0	2.38649	0
Unigene29873_All	14.21	9.81	11.7	15.4	19.4	24.95	7.56	14.33	12.89	2.53	4.15	3.3	0.743797	1.22894e-151	-0.0284179	0.112073	-1.83563	0	-0.772215	6.54039e-161	-2.57942	0	-1.80721	0
Unigene29972_All	22.17	15.04	15.86	29.68	22.54	21.97	7.03	24.35	21.71	7.75	17.22	7.42	0.4877	2.87154e-44	0.0164596	0.182454	-0.705914	4.84699e-61	-0.47124	1.84132e-41	-1.19361	2.15485e-202	-0.722373	6.9702e-64
Unigene30085_All	871.2	1036.48	1149.25	767.1	590.12	603.3	240.33	631.13	439.78	734.96	1040.53	976.56	-0.638003	0	-1.20845	0	-0.146149	5.45373e-291	-0.570444	0	0.491854	0	1.0623	0
Unigene30093_All	1988.7	3280.09	1128.93	12224.1	20987.5	17895.5	4209.16	14229.4	7301.9	124.41	316.14	309.28	3.00139	0	2.02974	0	-3.07989	0	-0.97165	0	-6.08128	0	-5.10963	0
Unigene30301_All	15.69	12.17	22	11.96	4.93	9.32	14.81	12.48	15.06	19.25	33.25	31.95	-0.92402	1.95646e-134	-0.229194	3.545e-12	0.766416	9.40346e-167	0.694825	1.10721e-70	1.69044	0	0.99561	6.93428e-258
Unigene30335_All	21.45	10.32	12.94	15.31	17.12	18.88	2.78	10.32	12.57	8.87	9.17	6.01	0.202548	5.28229e-07	-0.784666	6.9482e-57	-0.886761	2.1448e-70	-0.987213	3.99809e-95	-1.08931	4.87909e-113	-0.102096	0.0220218
Unigene30463_All	33.18	11.44	34.57	16.7	19.83	25.56	15.18	18.57	16.82	9.68	10.95	11.66	-0.349239	6.75621e-44	-0.638653	1.05458e-128	-1.2888	0	-0.289414	7.19317e-25	-0.939557	4.11112e-198	-0.650143	2.25653e-86
Unigene30689_All	15.87	15.16	14.88	24.16	39.89	23.42	23.61	21.37	32.16	15.46	10.64	12.26	0.93467	4.57004e-122	0.761746	8.68217e-77	-0.2484	1.4656e-07	-0.172924	3.81283e-07	-1.18307	6.24901e-180	-1.01015	1.99105e-123
Unigene30696_All	30.81	11.15	27.78	11.77	14.7	16.96	4.45	12.73	9.39	8.59	20.64	8.87	-0.681285	5.72018e-108	-1.37838	0	-0.868161	2.04559e-164	-0.6971	2.32286e-70	-0.186877	4.56793e-08	0.510223	1.54059e-36
Unigene30843_All	48.27	35.75	42.95	19.18	12.06	7.81	6.88	19.45	11.87	24.08	48.55	47.39	-1.69686	0	-1.71902	0	-0.0752473	3.69538e-05	-0.0221643	0.138785	1.62161	0	1.64377	0
Unigene30859_All	5.89	7.05	5.27	19.88	16.51	11.28	16.06	17.23	17.36	1.63	3.19	3.55	1.3909	4.77795e-209	1.48425	8.27636e-245	-1.11329	6.24424e-58	0.0933537	0.002775	-2.50418	0	-2.59754	0
Unigene31_All	60.82	134.86	73.3	50.92	44.99	35.23	31.78	44.95	43.97	48.85	47.24	78.86	-1.03331	0	-1.14581	0	-0.612141	2.81269e-303	-0.112501	1.15485e-07	0.421172	8.1259e-102	0.533673	3.72402e-155
Unigene31166_All	1425.38	2440.27	1348.51	486.3	560.05	423.45	201.88	526	554.36	588.21	1060.8	939.39	-1.82457	0	-2.01242	0	-1.00452	0	-0.187852	1.26305e-209	0.82005	0	1.0079	0
Unigene31185_All	7.01	7.68	3.65	11.25	22.4	12.78	25.81	23.29	23.12	2.06	3.31	5.19	1.34192	3.26362e-167	1.98628	0	-0.787308	2.70543e-29	0.644355	2.79304e-77	-2.12923	0	-2.77359	0
Unigene31334_All	16.46	12.77	24.48	15.92	13.11	10.64	16.48	15.02	12.73	23.28	48.06	46.6	-0.432844	3.69013e-26	-0.268633	1.03046e-11	1.14484	1.09537e-297	0.164211	5.91408e-05	1.57768	0	1.41347	0
Unigene31343_All	26.75	9.27	22.49	16.59	12.5	8.19	14.38	19.94	18.66	27.26	42.39	29.41	-0.645568	1.97343e-64	-0.131105	7.66766e-05	0.766916	6.13315e-147	0.514462	1.27786e-39	1.41248	0	0.898021	3.55557e-191
Unigene31608_All	8.32	13	5.02	16.9	18.34	17.38	6.42	13.52	16.4	2.19	4.01	4.37	1.00252	1.14378e-88	0.479156	2.45739e-18	-1.30489	2.02925e-68	-0.523359	1.25261e-29	-2.30741	1.21788e-296	-1.78405	4.26453e-148
Unigene31715_All	12.99	23.17	12.09	32.49	25.64	26.59	12.49	35.31	41.14	6.72	8.27	10.69	0.815852	1.30436e-142	0.895376	1.31038e-175	-0.900598	4.6778e-97	0.0795247	0.00147621	-1.71645	0	-1.79597	0
Unigene31716_All	10.54	13.67	4.72	17.61	19.7	18.03	5.55	14.2	15.29	1.92	2.22	4.81	0.939065	1.39165e-102	0.290589	1.67182e-09	-1.6797	9.77504e-133	-0.648476	1.15059e-54	-2.61877	0	-1.97029	3.19354e-200
Unigene31722_All	12.56	14.36	18.8	8.18	5.69	8.01	4.92	9.02	9.61	14.44	27.29	18.58	-1.06159	1.56144e-201	-0.948906	3.52464e-167	0.402937	5.86905e-50	0.112683	0.00241258	1.46453	0	1.35184	0
Unigene31746_All	33.29	27.78	32.6	10.85	7.68	8.08	4.52	6.2	6.95	7.72	16.77	18.69	-1.8126	0	-2.39842	0	-1.11125	0	-0.585811	4.97105e-41	0.701351	6.02597e-91	1.28716	4.16463e-245
Unigene31789_All	31.71	41.01	30.58	83.05	64.16	53.5	61.62	64.89	60.19	15.37	32.54	49.28	0.96433	2.46925e-240	0.871344	9.90094e-190	-0.0703967	0.0122969	-0.0929863	9.25924e-05	-1.03473	1.48867e-271	-0.941741	4.02023e-217
Unigene32190_All	37.19	25.75	24.24	7.4	5.95	6.05	8.74	6.59	4.46	28.88	52.47	54.9	-2.16556	0	-2.1347	0	0.64909	0	0.030858	0.12178	2.81465	0	2.78379	0
Unigene32371_All	16.88	21.6	8.09	47.19	48.07	43.27	38.89	44.7	43.83	7.21	13	14.68	1.57634	0	1.46465	0	-0.406113	2.17443e-19	-0.111688	4.08649e-06	-1.98245	0	-1.87077	0
Unigene32439_All	15.89	18.08	10.61	30.18	29.09	17.73	11.66	23.28	22.51	4.75	10.39	14.19	0.791619	9.14441e-168	0.376782	2.84419e-34	-0.596436	1.91619e-60	-0.414837	1.93771e-53	-1.38805	0	-0.973218	8.25845e-179
Unigene32444_All	12.42	6.77	14.68	15.25	19.04	18.15	9.16	14.27	11.62	4.78	6.19	6.12	0.632213	2.20085e-94	0.0583902	0.028308	-0.981647	3.32268e-130	-0.573823	3.29023e-79	-1.61386	0	-1.04004	2.98025e-148
Unigene3251_All	102.29	100.33	31.19	51.38	33.37	25.9	74.32	64.31	40.3	45.35	105.89	89.49	-1.07376	0	-0.370579	4.14851e-59	0.0542808	0.00318853	0.703184	9.25283e-144	1.12804	0	0.42486	5.77792e-79
Unigene32511_All	8.81	5.75	9.34	19.35	12.76	15.01	27.12	17.04	12.61	5.77	9.88	4.97	0.985191	1.53464e-62	1.26423	1.24453e-111	-0.201627	0.00170262	0.279043	2.43481e-09	-1.18682	8.01496e-85	-1.46586	3.25391e-140
Unigene32609_All	23.47	15.88	28.39	12.91	13.86	12.75	11.31	16.03	12	23.1	42.3	36.76	-0.773969	4.61376e-91	-0.770192	4.98963e-90	0.601787	2.57705e-89	0.00377711	0.228252	1.37576	0	1.37198	0
Unigene32656_All	24.34	17.84	28.66	18.35	16.25	19.51	13.1	25.51	23.07	37.31	32.39	46.34	-0.384851	1.38454e-28	-0.185622	1.84804e-08	0.721734	9.73478e-141	0.199228	1.64398e-08	1.10658	7.95116e-288	0.907356	7.24863e-207
Unigene32873_All	4.05	6.68	8.09	13.26	13.71	7.64	17.14	16.14	14.88	7.18	8.83	8.51	0.881338	2.1079e-102	1.36198	6.77824e-285	0.386409	2.59225e-18	0.480641	1.62171e-49	-0.494929	1.14647e-38	-0.975571	1.23867e-168
Unigene32886_All	90.4	63.08	143.51	31.78	21.34	14.77	5.28	17.5	21.64	94.23	85.81	73.67	-2.12445	0	-2.72765	0	-0.220174	2.25741e-44	-0.603205	4.30673e-65	1.90428	0	2.50748	0
Unigene33265_All	56.74	22.4	91.05	22.54	18.62	23.21	14.77	20.13	25.44	42.53	74.65	54.45	-1.3988	0	-1.48406	0	0.0204194	0.0825132	-0.0852556	0.00500675	1.41922	0	1.50448	0
Unigene33325_All	21.8	26.71	24.84	14.92	10.31	12.65	6.32	11	12.99	7.44	10.91	13.04	-0.951005	0	-1.26788	0	-1.22014	0	-0.316876	3.46419e-25	-0.26914	1.66635e-19	0.0477368	0.0381026
Unigene33388_All	1658.55	1561.14	2245.64	1564.73	522.82	1041.61	2270.09	1957.79	1942.14	1974.83	2714.43	2413.8	-0.800012	0	0.182397	0	0.3842	0	0.982409	0	1.18421	0	0.201803	0
Unigene33584_All	31.58	26.36	27.68	23.99	36.73	27.19	12.89	15.81	15.58	6.27	15.69	7.74	0.0431089	0.0716037	-0.933564	8.32899e-98	-1.51576	1.23274e-210	-0.976673	3.0748e-108	-1.55887	3.29707e-226	-0.5822	4.51452e-24
Unigene33607_All	81.06	56.76	132.3	48.42	58.54	43.27	27.66	39.45	41.16	20.69	60.4	40.6	-0.840343	1.0709e-261	-1.30052	0	-1.13622	0	-0.460174	3.69012e-51	-0.295878	4.95511e-24	0.164296	1.38964e-07
Unigene33710_All	20.68	9.76	19.74	8.59	7.05	7.29	5.14	9.61	7.24	13.38	16.89	13.93	-1.12574	1.01689e-159	-1.17703	7.30898e-171	-0.176565	2.57293e-07	-0.0512937	0.088924	0.949171	2.52483e-108	1.00046	2.90801e-117
Unigene33717_All	20.29	29.63	22.27	26.4	51.33	41.49	34.26	26.47	32.87	11.96	12.9	23.02	0.725808	4.61671e-150	0.383677	1.71257e-38	-0.581654	9.51806e-63	-0.342131	3.11168e-39	-1.30746	0	-0.965331	1.36819e-192
Unigene33944_All	6.37	10.07	10.32	9.92	12.72	10.77	24.3	20.56	11.15	7.95	11.41	19.25	0.320857	1.06484e-20	1.07068	2.28718e-273	0.534451	1.50315e-58	0.749823	2.6878e-150	0.213594	2.84326e-12	-0.536229	3.6813e-84
Unigene34005_All	8.82	14.77	9.06	11.55	28.73	17.52	7.89	13.93	18.26	4.42	9.41	10.27	0.825118	2.60129e-122	0.305644	1.33555e-15	-0.43065	2.7195e-23	-0.519474	1.29822e-54	-1.25577	6.01068e-244	-0.736293	5.48352e-71
Unigene34119_All	100.03	221.97	77.85	24.1	25.56	43.11	11.53	15.12	4.4	11.76	30.16	30.48	-2.10433	0	-3.66671	0	-2.45101	0	-1.56238	1.55012e-251	-0.346677	4.09116e-21	1.2157	9.66672e-137
Unigene34138_All	29.57	25.31	22.62	32.54	35.84	42.22	18.03	30.81	27.53	8.47	17.54	15.98	0.514873	2.97513e-152	-0.0123001	0.158926	-0.879704	2.26987e-274	-0.527173	4.69575e-158	-1.39458	0	-0.867404	1.36274e-264
Unigene34167_All	6.74	8.87	8.31	19.53	14.4	16.39	15.58	13.82	22.83	4.93	11.74	10.59	1.07646	6.32332e-174	1.13337	8.33326e-196	0.195378	4.50981e-06	0.0569156	0.0225308	-0.881079	3.36698e-126	-0.937994	1.099e-144
Unigene34254_All	724.25	1072.26	381.98	4241.51	6194.81	4025.02	1138.58	3303.02	2100.23	47.02	72.58	60.37	2.73441	0	1.60473	0	-3.58771	0	-1.12967	0	-6.32212	0	-5.19244	0
Unigene34331_All	93.86	81.2	89.82	33	32.41	39.83	54.65	38.38	55.52	57.77	133.61	93.51	-1.32865	0	-0.826638	0	0.112456	3.65788e-13	0.502009	9.38226e-103	1.4411	0	0.939094	0
Unigene34355_All	14.69	20.97	13.82	60	30.32	28.76	13.75	19.1	13.98	5.66	7.84	9.71	1.27281	1.2137e-272	-0.063088	0.0525806	-1.07961	1.53237e-88	-1.3359	2.64721e-292	-2.35242	0	-1.01652	1.06025e-76
Unigene34535_All	30.96	42.99	25.76	63.62	37.21	54.62	16.93	42.37	41.06	12.24	21.92	25.18	0.645995	1.43844e-97	0.0286853	0.117966	-0.733792	6.35406e-79	-0.61731	1.18662e-89	-1.37979	0	-0.762477	1.64487e-85
Unigene34541_All	41.07	48.34	32.35	92.93	177.27	118.9	66.82	123.18	164.98	4.51	7.17	10.78	1.67863	0	1.55585	0	-2.42747	0	-0.122777	4.58948e-18	-4.1061	0	-3.98332	0
Unigene34626_All	19.14	15.04	14.41	10.91	6.48	10.11	2.49	9.31	8.48	9.78	14.92	10.64	-0.817743	1.44233e-134	-1.24857	1.14035e-267	-0.45527	7.95599e-49	-0.430824	1.31828e-25	0.362472	1.35872e-24	0.793297	6.9253e-94
Unigene34837_All	2.12	1.94	1.37	32.28	29.56	32.67	24.46	48.68	39.78	0.7	0.91	0.81	4.12609	0	4.39351	0	-1.15801	1.28202e-16	0.267417	5.23871e-24	-5.28411	0	-5.55153	0
Unigene35068_All	34.06	26.56	31.01	166.96	66.61	100.46	88.69	229.72	186.53	21.77	54.75	25.65	1.8712	0	2.47733	0	0.163403	8.17845e-10	0.606123	0	-1.7078	0	-2.31392	0
Unigene35176_All	39.49	17.02	57.1	13.96	17.3	16.95	7.08	11.76	15.35	21.78	29.64	29.56	-1.23421	0	-1.72109	0	-0.480292	2.45926e-73	-0.48688	1.28486e-32	0.753921	6.37575e-117	1.2408	1.48878e-263
Unigene35553_All	43.02	25.91	40.18	12.23	13.91	26.94	2.72	8.91	6.58	9.29	11.64	9.34	-1.03798	0	-2.56994	0	-1.84486	0	-1.53196	0	-0.806881	5.07604e-133	0.725076	9.67177e-64
Unigene35610_All	13.64	16.15	13.51	18.34	14.15	11.46	24.73	14.28	19.97	15.26	35.71	40.78	0.0260979	0.144061	0.454645	9.23133e-30	1.09447	8.2489e-206	0.428548	8.08433e-27	1.06837	3.56498e-198	0.639824	4.49811e-83
Unigene35703_All	14.7	17.04	12.86	13.9	17.95	19.09	6.24	14.89	14.66	5.03	9.48	7.55	0.192778	8.76122e-14	-0.307728	2.54337e-27	-1.0115	1.11526e-219	-0.500507	9.97921e-74	-1.20427	0	-0.703767	3.40882e-96
Unigene35845_All	6.29	3.05	7.59	13.48	8.72	9.41	15.01	17.38	19.66	4.72	8.45	6.87	0.904272	7.97937e-110	1.6268	0	0.247189	2.30535e-08	0.722531	2.26096e-122	-0.657083	1.16391e-64	-1.37961	0
Unigene35859_All	8.92	8.21	6.69	17.43	9.6	7.76	23.46	9.59	13.04	24.84	35.83	41.52	0.550167	2.76157e-39	0.954573	3.70602e-131	2.10729	0	0.404407	7.42205e-30	1.55712	0	1.15272	0
Unigene36077_All	53.23	62.62	52.19	35.78	44.55	35.06	18.3	22.62	24.99	23.64	47.18	41.36	-0.540538	6.07665e-215	-1.34279	0	-0.578104	7.06013e-244	-0.802252	3.0822e-295	-0.0375656	0.00885555	0.764687	1.15663e-266
Unigene36175_All	20.79	16.29	20.24	3.68	4.96	9.42	8.5	15	15.39	22.43	27.58	25.6	-1.66525	0	-0.550557	2.40129e-77	0.404125	4.52684e-59	1.1147	2.03139e-175	2.06938	0	0.954681	1.41174e-264
Unigene36775_All	29.23	22.88	48.14	20.79	12.54	17.37	22.57	19.81	29.7	23.69	31.84	45.9	-0.979835	2.84287e-240	-0.468069	1.55243e-66	0.0257772	0.0759462	0.511766	8.86244e-57	1.00561	6.72192e-257	0.493846	6.68791e-75
Unigene3696_All	16.78	9.28	17.52	15.33	14.9	16.56	12.46	21.43	23.8	10.32	6.38	7.49	0.105137	0.000290141	0.414028	1.05092e-44	-0.843628	4.52346e-118	0.308891	1.55373e-26	-0.948765	1.50979e-154	-1.25766	6.73195e-299
Unigene37108_All	46.49	36.72	20.77	18.38	17.64	22.69	5.58	9.93	16.9	12.42	29.28	22.43	-0.821691	5.08283e-158	-1.67116	0	-0.688938	1.68315e-117	-0.849472	7.81144e-95	0.132753	2.69806e-05	0.982225	5.21464e-133
Unigene3713_All	31.22	44.39	57.62	9.28	4.57	11.26	3.33	6.89	3.89	11.92	23.34	10.78	-2.40558	0	-3.22829	0	-1.53024	0	-0.822711	5.54719e-68	0.875337	1.30748e-138	1.69805	0
Unigene37140_All	14.77	21.32	13.29	20.31	12.86	14.03	13.49	15.67	12.32	18.51	33.39	35.69	-0.0618795	0.00882543	-0.244117	1.64088e-17	0.831974	9.53149e-269	-0.182238	2.30309e-10	0.893854	1.48704e-303	1.07609	0
Unigene37185_All	26.98	23.94	34.37	6.73	4.45	5.35	7.64	8.79	6.49	32.27	39	48.87	-2.36533	0	-1.88961	0	0.498563	1.63958e-189	0.475717	2.44118e-34	2.86389	0	2.38817	0
Unigene37407_All	23.26	32.8	12.06	44.82	23.49	51	22.28	39.94	67.46	13.47	16.57	21.16	0.812094	5.0032e-158	0.940611	2.73865e-220	-0.401504	3.86185e-27	0.128517	3.32431e-07	-1.2136	0	-1.34211	0
Unigene37575_All	16.46	16.77	13.67	18.09	34.21	21.74	11.43	20.99	17.19	7.75	11.88	11.56	0.660727	7.2924e-86	0.0941464	0.004238	-0.580693	2.21625e-44	-0.566581	2.55182e-65	-1.24142	3.22801e-246	-0.674839	7.24778e-61
Unigene37686_All	10.81	11.56	11.12	19.42	5.17	12.05	15.44	14.84	18.22	2.66	5.81	5.85	0.134134	0.000100953	0.54114	1.01935e-56	-1.21902	1.16879e-154	0.407007	2.72282e-34	-1.35315	2.49221e-199	-1.76016	0
Unigene3786_All	35.78	41.02	41.39	42.38	54.31	66.5	35.45	79.82	45.8	9.41	16.07	21.01	0.468034	1.2437e-91	0.462888	3.12063e-89	-1.33582	0	-0.00514668	0.201935	-1.80386	0	-1.79871	0
Unigene38049_All	14.19	15.02	10.53	7.32	10.43	19.02	8.78	9.11	11.09	2.9	8.21	6.34	-0.110925	0.000862169	-0.447758	3.01822e-31	-1.18226	2.45826e-162	-0.336832	7.96195e-18	-1.07133	6.53614e-129	-0.734502	1.17643e-54
Unigene38050_All	33.36	68.17	25.36	43.28	66.58	68.67	30.43	48.79	53.17	18.07	31.07	35.02	0.495896	2.66802e-80	0.0767515	0.00246325	-0.579427	3.84536e-76	-0.419144	4.3901e-59	-1.07532	6.60539e-306	-0.656179	3.03978e-99
[truncated: 359 more rows]
