# Supplementary material for: Transcriptome-Wide Gene Expression Plasticity in Stipa grandis in Response to Grazing Intensity Differences
Source: Int J Mol Sci. 2021 Nov 2;22(21):11882. doi: 10.3390/ijms222111882 (PMC8611654; doi:10.3390/ijms222111882)
Supplement: Supplementary file 1 [file ijms-22-11882-s001.zip › Table S5. K-means clustering analysis of the differentially expressed genes.xlsx]

## Sheet: Sheet1
Gene ID	Clusters	CK	LG	MG	HG
CL455.Contig15_All	1	61.96	50.28	31.87	96.46
CL8044.Contig9_All	1	7.36	2.34	5.31	29.33
Unigene32609_All	1	22.58	13.17	13.11	34.05
CL9870.Contig1_All	1	25.73	9.97	12.96	34.79
Unigene26777_All	1	19.96	11.21	16.22	23.49
CL16033.Contig5_All	1	21.59	11.73	18.9	34.98
CL9518.Contig2_All	1	18.1	10.13	9.71	28.35
CL14093.Contig20_All	1	79.16	36.5	62.96	89.39
CL1571.Contig4_All	1	38.78	13.38	16.77	53.32
CL3096.Contig2_All	1	83.79	37.3	58.58	149.23
CL6932.Contig9_All	1	34.32	20.66	27.04	45.04
Unigene63915_All	1	17.28	17.57	16.5	34.96
CL4863.Contig1_All	1	31.8	13.22	19.36	36.17
Unigene38713_All	1	22.76	13.44	19.24	27.24
CL15160.Contig60_All	1	18.17	8.59	10.58	33.02
CL581.Contig7_All	1	26.03	14.12	12.5	30.86
Unigene31722_All	1	15.24	7.29	7.85	20.1
CL6421.Contig29_All	1	65.84	45.14	63.9	105.24
CL14977.Contig1_All	1	538.98	355.15	474.03	765.89
CL9071.Contig1_All	1	34.36	34.24	22.49	46.78
CL11735.Contig4_All	1	19.44	3.01	12.49	27.39
CL5521.Contig13_All	1	9.09	5.94	4.14	23.47
CL3243.Contig30_All	1	30.96	9.49	7.1	68.17
CL6140.Contig1_All	1	50.69	24.77	35.09	55.1
CL761.Contig11_All	1	10.46	7.54	7.01	18.52
Unigene30301_All	1	16.62	8.74	14.12	28.15
CL9518.Contig1_All	1	10.93	6.66	7.2	18.6
CL7511.Contig8_All	1	66.02	36.52	56.05	107.17
CL1150.Contig51_All	1	16.04	6.1	8.54	32.95
Unigene24534_All	1	23.5	12.3	14.9	33.12
CL850.Contig4_All	1	100.29	123.62	80.09	165.16
CL1988.Contig85_All	1	20.45	8.5	16.25	35.98
Unigene52962_All	1	17.1	5.89	5.31	26.8
CL15271.Contig1_All	1	23.43	17.15	13.12	30.29
CL9797.Contig3_All	1	70.5	45.93	65.86	109.65
CL7924.Contig1_All	1	84.77	55.78	48.78	144.55
CL6007.Contig5_All	1	31.61	10.19	12.01	53.34
Unigene3251_All	1	77.94	36.88	59.64	80.24
Unigene36175_All	1	19.11	6.02	12.96	25.2
CL12877.Contig2_All	1	59.92	40.54	42.11	89.46
Unigene1432_All	1	126.52	41.74	50.99	215.82
CL1789.Contig3_All	1	17.34	5.76	8.01	27.47
Unigene19240_All	1	12.94	8.67	11.88	17.8
CL1058.Contig37_All	1	47.83	13.76	17.35	70.11
CL15482.Contig6_All	1	11.8	6.9	7.74	21.62
CL2412.Contig1_All	1	30.17	28.43	29.94	82.8
CL5542.Contig3_All	1	142.13	87.02	126.52	175.16
CL14445.Contig2_All	1	15.21	9.27	5.93	20.55
CL222.Contig92_All	1	16.06	9.35	10.37	20.7
CL6926.Contig29_All	1	26.32	14.54	20.85	33.69
CL5864.Contig2_All	1	25.81	17.98	23.67	53.09
CL8722.Contig5_All	1	86.25	51.28	76.45	144.83
CL14594.Contig43_All	1	19.68	14.67	10.78	32.07
CL4330.Contig3_All	1	29.21	27.6	16.73	51.93
CL616.Contig22_All	1	21.19	8.3	6.83	29.63
CL3873.Contig10_All	1	12.03	12.26	10.47	27.07
CL815.Contig26_All	1	11.3	6.01	6.37	21.36
CL16360.Contig6_All	1	12.95	7.93	7.01	18.99
CL691.Contig2_All	1	33.4	24.08	32.6	51.66
CL3858.Contig63_All	1	62.35	22.14	17.83	86.18
CL4539.Contig1_All	1	45.6	23.95	33.86	60.09
Unigene18336_All	1	10.82	4.75	5.65	21.38
CL527.Contig3_All	1	59.64	25.69	36.37	68.84
Unigene21045_All	1	37.27	3.41	2.47	49.09
CL950.Contig13_All	1	29.47	1.34	1.89	43.41
Unigene45583_All	1	84.12	44.08	79.61	114.87
CL3300.Contig1_All	1	41.08	27.84	25.39	51.67
CL5192.Contig7_All	1	17.93	6.63	7.68	21.51
Unigene22050_All	1	15.46	15.23	11.01	26.39
Unigene6880_All	1	66.69	21.13	24.33	95.27
Unigene641_All	1	26.46	22	16.81	36.36
CL1846.Contig1_All	1	16.22	3.08	5.15	35.16
Unigene44836_All	1	51.89	38.23	24.15	79.81
CL8754.Contig21_All	1	47.63	27.02	38.95	56.37
CL1227.Contig1_All	1	21.99	6.84	4.7	33.06
CL15316.Contig8_All	1	32.18	14.02	29.46	71.09
CL16039.Contig15_All	1	24.16	16.98	20.39	41.68
CL4976.Contig11_All	1	92.94	26.07	17.95	148.05
Unigene7480_All	1	16.64	13.45	15.44	27.86
CL3003.Contig16_All	1	39.75	11.01	11.99	55.57
Unigene1431_All	1	125.23	33.43	53.98	194.29
CL12374.Contig1_All	1	25.25	8.53	8.21	32.76
CL16574.Contig15_All	1	124.79	63.59	77.27	147.24
CL11979.Contig5_All	1	23.15	12.71	10.48	31.8
Unigene61630_All	1	25.11	12.58	21.13	32.39
Unigene37185_All	1	28.43	5.51	7.64	40.05
Unigene57116_All	1	23.47	10.65	11.94	31.59
CL13586.Contig1_All	1	26.01	15.44	12.75	36.04
CL455.Contig21_All	1	23.06	16.72	15.49	35.68
CL1227.Contig18_All	1	13.63	6.05	6	33.24
CL6422.Contig2_All	1	21.6	8.75	9.75	30.47
Unigene10283_All	1	11.13	7.6	9.31	17.17
CL2932.Contig30_All	1	93.99	31	49.29	177.68
CL375.Contig2_All	1	76.76	41.16	54.47	83.93
CL11028.Contig1_All	1	23.37	5.21	8.18	39.58
CL8708.Contig2_All	1	16.41	13.4	9.72	20.19
CL762.Contig11_All	1	11.36	8.9	8.03	26.21
CL6376.Contig4_All	1	20.86	11.14	11.94	36.25
CL9436.Contig3_All	1	23.02	11.67	17.22	24.86
CL1567.Contig84_All	1	17.83	9.63	15.89	21.17
CL6177.Contig3_All	1	17.65	10.66	8.29	24.79
CL1736.Contig82_All	1	78.69	13.9	11.24	118.69
CL16030.Contig2_All	1	40.26	18.8	32.44	50.09
Unigene11559_All	1	1016.16	435.45	340.45	1549.13
CL1445.Contig17_All	1	12.72	9.14	10.65	19.67
CL553.Contig12_All	1	66.59	39.94	50.33	82.08
CL2267.Contig7_All	1	14.09	5.04	8.17	15.8
CL13027.Contig2_All	1	31.81	13.05	24.57	52.78
Unigene4982_All	1	212.93	84.81	97.38	253.03
CL1058.Contig41_All	1	284.03	126.17	236.32	837.22
CL17135.Contig11_All	1	101.03	24.31	34.13	204.04
CL8143.Contig2_All	1	20.13	11.65	14.99	30.28
Unigene86664_All	1	63.35	39.14	35.01	147.45
CL2676.Contig10_All	1	930.56	511	612.11	1080.49
CL16824.Contig5_All	1	13.42	4.57	10.73	18.8
CL1083.Contig37_All	1	29.56	20.69	27.64	60.52
Unigene22312_All	1	16.33	9.74	15.53	20.67
CL12122.Contig1_All	1	22.93	11.15	16.74	33.31
CL7415.Contig5_All	1	31.77	5.62	12.53	38.63
CL4214.Contig1_All	1	28.48	13.62	14.75	34.22
Unigene38769_All	1	58.49	21.17	41.75	95.44
CL1206.Contig64_All	1	112.98	48.78	55.66	138.16
Unigene61573_All	1	77.46	40.46	62.97	115.39
CL5947.Contig3_All	1	60.69	27.03	39.02	76.03
CL15357.Contig9_All	1	17.84	9.09	8.66	21.62
Unigene32656_All	1	23.61	18.04	20.56	38.68
CL1857.Contig1_All	1	36.05	16.48	10.48	53.78
CL3165.Contig2_All	1	61.26	24.17	34.91	75.26
Unigene87272_All	1	11.79	7.06	7.61	18.23
CL3901.Contig7_All	1	28.22	17.64	20.79	36.95
Unigene61672_All	1	41.23	12.04	12.54	68.68
CL7559.Contig6_All	1	35.62	15.23	29.8	66.18
CL16228.Contig5_All	1	47.82	33.34	34.89	94.4
CL1834.Contig3_All	1	93.14	44.47	45.19	123.96
CL2146.Contig6_All	1	17.89	9.55	14.27	19.3
Unigene67754_All	1	8.74	5.15	4.48	23.73
CL10252.Contig8_All	1	51.79	34.04	48.43	125.6
CL10150.Contig4_All	1	8.33	3.32	6.48	27.51
CL2297.Contig2_All	1	22.03	16.23	9.69	30.5
Unigene86674_All	1	16.47	11.61	15.47	33.14
CL9988.Contig4_All	1	64.04	47.77	58.87	114.82
CL15523.Contig3_All	1	28.65	20.44	27.94	45.24
CL8410.Contig1_All	1	19.07	12.69	17.3	25.93
Unigene64889_All	1	15.26	11.88	13.23	27.45
CL14773.Contig6_All	1	17.52	11.72	9.73	22.23
CL6215.Contig1_All	1	31.85	22.96	24.44	56.36
Unigene54465_All	1	22.57	13.65	13.46	32.28
CL8549.Contig5_All	1	15.05	7.37	12.14	22.87
CL10944.Contig6_All	1	34.8	18.02	21.45	44.51
CL15357.Contig8_All	1	16.57	10.18	13.26	23.61
CL5425.Contig3_All	1	18.46	12.41	15.76	25.11
CL455.Contig22_All	1	55.85	33.85	26.13	73.97
Unigene28645_All	1	11.83	5.18	5.78	17.8
Unigene78018_All	1	28.79	15.39	17.66	39.15
CL164.Contig17_All	1	12.24	6.67	8.03	14.21
CL4984.Contig10_All	1	18.01	10.45	12.18	34.96
Unigene31343_All	1	19.5	12.43	17.66	33.02
CL1202.Contig13_All	1	10.23	2.73	5.65	27.27
CL2998.Contig1_All	1	8.3	7.54	7.68	16.7
CL210.Contig30_All	1	24.37	10.63	13.24	43.72
CL10150.Contig2_All	1	25.23	13.88	18.07	54.66
CL5196.Contig17_All	1	83.88	29.11	48.06	124.86
Unigene86737_All	1	22.28	16.3	18.86	34.71
Unigene16946_All	1	11.92	9.58	6.04	20.3
Unigene18024_All	1	116.11	43.72	91.13	189.44
CL9518.Contig13_All	1	14.41	4.44	6.98	20.01
Unigene287_All	1	32.35	8.1	16.57	40.6
CL2013.Contig15_All	1	12.5	11.06	6.22	16.09
CL822.Contig36_All	1	14.02	11.24	8.61	18.36
CL402.Contig71_All	1	13.93	3.71	3.49	26.56
CL2238.Contig9_All	1	17.49	10.01	10.41	21.37
CL6238.Contig2_All	1	15	8.61	10.05	34.12
CL3939.Contig24_All	1	19.36	9.38	15.66	23.69
CL11690.Contig5_All	1	10.45	6.92	9.45	14.11
CL16644.Contig1_All	1	9.44	5.11	7.69	18.65
CL738.Contig39_All	1	97.28	52.19	75.97	105.65
CL7771.Contig2_All	1	19.38	18	16.67	34
CL1606.Contig1_All	1	34.51	15.83	24.64	52.77
CL9071.Contig2_All	1	11.27	3.46	8.67	20.73
Unigene48588_All	1	560.38	139.93	121.14	1099.92
CL6069.Contig3_All	1	8.27	8.15	6.36	21.56
CL815.Contig20_All	1	16.13	6.76	15.45	44.21
CL2632.Contig6_All	1	24.41	5.88	8.52	41.9
CL816.Contig42_All	1	18.02	8.24	11.15	20.94
CL7650.Contig1_All	1	35.57	18.18	14.83	43.23
CL761.Contig10_All	1	11.98	3.71	2.38	35.27
CL10363.Contig5_All	1	14.32	8	7.94	18.18
CL3941.Contig15_All	1	190.65	69.86	172.11	191.19
CL3096.Contig6_All	1	32	15.17	23.06	47.29
CL1297.Contig1_All	1	42.56	17.5	28.38	45.28
Unigene42563_All	1	23.48	13.02	8.81	33.26
CL1715.Contig1_All	1	11.18	5.36	9.26	15.64
CL9795.Contig5_All	1	24.73	5.56	4.82	35.9
CL6007.Contig8_All	1	9.85	4.91	5.55	23.41
Unigene9420_All	1	18.74	8.17	8.3	38.06
CL2842.Contig19_All	1	124.77	59.03	84.68	175.42
CL11198.Contig5_All	1	7.74	11.11	5.58	16.02
CL38.Contig6_All	1	15.28	6.94	7.59	19.41
CL151.Contig8_All	1	13.03	7.52	7.59	41.64
Unigene46575_All	1	13.42	3.59	5.57	21.17
CL7907.Contig133_All	1	16.26	16.74	14.37	33.06
Unigene10852_All	1	19.16	8.49	15.67	44.45
CL16420.Contig1_All	1	36.4	20.88	28.02	49.13
CL8044.Contig7_All	1	30.41	7.08	10.45	46.33
Unigene9358_All	1	15.43	9.09	7.18	25.72
Unigene37140_All	1	16.46	15.73	13.83	29.2
CL206.Contig8_All	1	19.32	10.86	14.81	24.38
CL6969.Contig1_All	1	18.24	14.7	12.06	34.8
Unigene71744_All	1	36.39	17.93	27.23	113.91
CL6748.Contig4_All	1	41.99	3.85	1.34	61.71
CL3184.Contig4_All	1	143.42	40.66	50.74	223.05
CL12414.Contig3_All	1	19.3	15.13	13.83	27.82
Unigene90047_All	1	40.74	19.82	14.69	51.24
CL82.Contig4_All	1	26.68	12.49	17.28	35.1
CL3683.Contig4_All	1	148.79	49.11	68.23	206.44
Unigene9470_All	1	29.19	11.49	21.08	119.37
CL3349.Contig8_All	1	13.31	6.59	11.67	13.33
CL541.Contig10_All	1	64.08	29.15	55.61	89.51
CL5531.Contig1_All	1	16.52	8.26	13.92	21.24
Unigene32190_All	1	29.06	6.47	6.6	45.42
CL15578.Contig4_All	1	18.21	10.69	15.45	35.48
CL3409.Contig26_All	1	25.45	13.63	21.32	42.95
CL8646.Contig4_All	1	20.62	14.98	15.28	35.4
CL15083.Contig5_All	1	36.36	8.39	13.78	95.06
Unigene25304_All	1	11.13	7.94	6.17	16.84
CL1717.Contig8_All	1	13.17	3.94	2.73	20.76
CL38.Contig2_All	1	9.71	5.63	7.06	21.06
CL762.Contig5_All	1	17.32	9.56	6.83	21.57
CL14047.Contig1_All	1	74.89	20.7	27.47	92.28
CL4323.Contig8_All	1	12.72	4.74	4.73	22.68
CL3455.Contig23_All	1	19.01	3.8	3.63	31.01
CL151.Contig52_All	1	10.97	4.04	3.85	28.43
CL17067.Contig83_All	1	18.28	8.04	9.27	23.81
CL17079.Contig11_All	1	122.91	25.29	17.71	181.15
CL5196.Contig6_All	1	217.25	99.64	154.61	385.86
Unigene57929_All	1	56	17.75	26.51	69.83
CL2617.Contig4_All	1	52.85	10.42	8	98.96
CL7317.Contig14_All	1	35.49	17.1	19.29	43.65
CL3194.Contig60_All	1	19.62	7.86	13.34	29.13
CL1096.Contig104_All	1	25.85	11.53	22.79	40.23
CL5700.Contig59_All	1	30.56	15.11	19.57	36.58
Unigene1629_All	1	19.78	6.09	6.29	27.47
CL1187.Contig1_All	1	20.86	15.61	12.06	25.45
CL527.Contig10_All	1	32.04	15.32	29.33	59.77
CL1123.Contig81_All	1	74.52	37.72	56.93	106.97
CL1046.Contig26_All	1	35.99	23.98	19.88	54.4
CL6177.Contig1_All	1	20.42	16.11	17.44	35.86
Unigene31334_All	1	17.9	13.22	14.74	39.31
CL5762.Contig3_All	1	13.79	6.08	8.84	44.9
Unigene32371_All	2	15.52	46.18	42.47	11.63
Unigene64178_All	2	22.73	34.09	25.52	12.82
CL10067.Contig4_All	2	12.83	17.75	14.33	6.8
CL5393.Contig3_All	2	10.14	18.42	17.01	3.62
Unigene25328_All	2	18.87	27.21	22.19	11.45
Unigene38230_All	2	11.89	18.5	14.92	6.02
CL7741.Contig3_All	2	27.97	39.93	38.87	14.96
Unigene72384_All	2	9.03	30.49	27.28	7.6
CL12177.Contig4_All	2	9.01	18.64	15.88	5.55
Unigene20797_All	2	9.01	28.54	20.75	1.16
CL4872.Contig1_All	2	17.88	22.91	20.94	10.82
CL12416.Contig2_All	2	16.91	29.27	29.14	9.54
CL7976.Contig2_All	2	14.87	25.04	24.14	5.79
CL2418.Contig10_All	2	34.26	156.6	121.76	3.7
CL7915.Contig6_All	2	20.79	34.07	30.47	15.34
CL7017.Contig2_All	2	13.9	22.64	19.45	10.41
CL7987.Contig6_All	2	16.19	30.22	28.36	12.62
CL2415.Contig7_All	2	21.73	39.28	35.68	12.14
CL4153.Contig2_All	2	12.02	34.73	30.49	3.99
Unigene38689_All	2	9.32	12.16	13.31	5.55
CL5339.Contig9_All	2	13.07	19.95	17.59	4.99
CL8547.Contig7_All	2	20.84	23.97	23.81	9.37
CL1109.Contig10_All	2	71.08	134.95	148.92	21.93
CL6820.Contig4_All	2	29.88	49.72	44.29	24.64
CL6592.Contig4_All	2	20.24	32.29	21.88	6.74
Unigene7872_All	2	7.2	18.11	14.25	3.15
CL7355.Contig16_All	2	14.34	19.44	16.36	8.44
CL8869.Contig5_All	2	27.75	40.14	38.8	11.55
CL5439.Contig9_All	2	10.03	15.67	13.49	4.98
CL11462.Contig35_All	2	11.22	19.43	20.31	6.88
CL2666.Contig1_All	2	400.93	651	613.19	101.93
CL4810.Contig3_All	2	21.89	24.08	21.89	11.99
CL2842.Contig14_All	2	34.25	41.63	47.54	12.93
CL15932.Contig2_All	2	26.87	48.48	42.28	18.19
CL9751.Contig5_All	2	21.77	32.9	24.54	8.51
CL15005.Contig1_All	2	9.3	16.28	14.05	1.45
CL3795.Contig6_All	2	31.68	46.41	32.89	7.79
Unigene61567_All	2	10.56	19.02	15.96	6.72
Unigene69281_All	2	48.08	72.83	65.69	28.94
Unigene60653_All	2	23.94	38.94	37.48	18.76
CL3270.Contig13_All	2	11.89	22.27	24.49	2.52
CL9997.Contig2_All	2	24.86	28.03	23.67	8.72
CL5505.Contig2_All	2	21.69	43.96	35.19	11.49
CL10934.Contig2_All	2	69.83	125.06	113.17	55.14
CL15028.Contig2_All	2	103.86	177.98	159	47.59
CL4141.Contig3_All	2	53.23	79.93	81.42	30.18
Unigene18951_All	2	20.33	27.79	30.43	5.15
CL8579.Contig11_All	2	16.34	19.84	16.45	6.89
Unigene49920_All	2	29.98	44.64	35.27	19.64
CL15405.Contig2_All	2	9.46	13.12	13.17	6.52
Unigene53724_All	2	17.5	26.15	19.89	10.01
CL8103.Contig1_All	2	19.36	40.05	35.02	13.29
CL9265.Contig2_All	2	20.29	27.84	24.5	7.98
CL883.Contig22_All	2	10.46	20.74	17.67	4.62
CL13192.Contig2_All	2	12.05	22.36	19.93	3.57
CL6146.Contig2_All	2	14.58	20.56	20.88	10.22
Unigene66024_All	2	8.17	17.86	14.51	3.9
CL6742.Contig8_All	2	9.23	20.06	18.62	7.9
Unigene57909_All	2	19.35	32.58	29.42	15.43
CL8667.Contig1_All	2	8.31	15.45	12.72	5.82
Unigene84618_All	2	14.33	24.34	20.08	9.27
CL8709.Contig2_All	2	19.35	35.46	39.83	5.36
CL1751.Contig6_All	2	11.88	17.2	13.52	6.3
CL7619.Contig4_All	2	70.7	81.79	93.09	32.23
Unigene69373_All	2	10.3	12.29	14.15	5.84
CL6390.Contig1_All	2	15.55	27.89	23.04	5.53
CL15028.Contig1_All	2	142.44	196.43	222.39	43.18
CL583.Contig5_All	2	14.3	18.57	15.46	5.88
CL10679.Contig1_All	2	29.02	35.51	28.84	15.23
CL4243.Contig17_All	2	7.99	15.5	12.66	4.62
CL2181.Contig4_All	2	13.35	22.56	19.61	8.95
CL6630.Contig4_All	2	22.78	38.43	34.09	14.25
CL4624.Contig10_All	2	10.32	15.38	14.49	5.23
CL1540.Contig8_All	2	34.07	49.34	43.59	21.65
Unigene45897_All	2	15.78	23.57	17.04	5.77
Unigene61750_All	2	21.72	25.54	25.57	12.17
CL16429.Contig7_All	2	12.33	11.95	16.14	3.01
CL1987.Contig16_All	2	19.24	27.31	28.14	12
CL1725.Contig7_All	2	13.02	21.37	16.54	5.23
CL4810.Contig5_All	2	20.22	24.44	25.48	6.49
CL11077.Contig2_All	2	14.3	28.35	22.34	6.54
CL2546.Contig18_All	2	9.89	14.58	13.04	3.2
CL4637.Contig1_All	2	24.46	31.32	25.25	12.1
CL7355.Contig13_All	2	18.28	33.68	29.77	6.81
Unigene16638_All	2	11.72	16.94	14.86	7.28
CL16207.Contig1_All	2	10.01	18.45	17.28	6.35
CL4661.Contig4_All	2	21.75	35.46	27.89	11.89
CL8073.Contig2_All	2	27.28	52.04	48.07	24.69
CL9403.Contig2_All	2	12	18.84	15.08	5.64
CL3618.Contig16_All	2	30.89	55.68	48.54	17.38
CL12069.Contig20_All	2	169.89	255.53	203	103.92
CL3870.Contig3_All	2	22.9	34.57	27.93	14.16
Unigene45624_All	2	31.39	48.21	43.38	23.19
CL10597.Contig8_All	2	46.14	72.53	58.35	25.28
CL11057.Contig3_All	2	7.64	29.86	26.74	2.1
CL3554.Contig2_All	2	13.42	16.21	14.7	5.33
CL6578.Contig4_All	2	10.81	20.66	17.46	4.91
CL16143.Contig14_All	2	9.56	13.5	13.86	5.32
CL12506.Contig2_All	2	22.84	35.62	30.75	16.85
Unigene24558_All	2	85.54	124.69	116.63	34.86
CL3369.Contig4_All	2	16.87	37.51	34.26	11.62
CL3168.Contig6_All	2	9.36	12.67	13.58	4.92
CL11148.Contig2_All	2	57.66	106.57	87.85	32.02
CL13765.Contig2_All	2	6.74	26.39	23.72	0.62
CL6098.Contig2_All	2	48.54	116.42	92.82	26.78
Unigene38128_All	2	9.31	23.94	23.14	3.34
CL14785.Contig12_All	2	19.4	24.95	25.5	10.15
Unigene30689_All	2	15.3	29.16	25.71	12.79
Unigene50638_All	2	22.7	35.84	34.72	17.73
CL7164.Contig2_All	2	38.18	60.04	56.93	23.77
Unigene44850_All	2	9.51	15.28	14.46	6.34
Unigene6313_All	2	9.79	15.76	13.84	6.33
Unigene9680_All	2	11.89	15.24	13.85	6.33
CL13765.Contig1_All	2	11.11	19.91	17.74	3.66
CL2634.Contig22_All	2	9.68	16.66	18.1	4.92
Unigene25833_All	2	14.98	19.16	19.6	9.47
Unigene14417_All	2	15.9	24.97	17.15	4.3
CL12820.Contig1_All	2	38.02	61.21	59.04	15.64
CL6421.Contig6_All	2	34.87	39.38	45.94	6.28
CL2351.Contig2_All	2	25.01	48.28	44.05	17.93
CL3153.Contig16_All	2	51.35	93.96	75.4	29.29
Unigene26973_All	2	14.63	26.55	19.53	4.36
Unigene49733_All	2	12.59	22.91	20.09	4.93
CL5868.Contig1_All	2	13.24	18.95	18.34	7.95
CL5828.Contig3_All	2	20.41	26.45	23.33	10.07
CL6798.Contig2_All	2	21.52	36.12	31.07	13.4
CL11156.Contig8_All	2	35.51	41.3	36.42	19.74
CL14259.Contig1_All	2	11.02	21.04	17.95	3.72
CL16605.Contig17_All	2	113.61	127.74	131.11	51.65
CL9334.Contig5_All	2	25.62	42.23	44.23	10.43
Unigene25625_All	2	10.92	17.48	13.57	6.56
CL2718.Contig2_All	2	9.47	15.31	12.07	5.5
CL2233.Contig5_All	2	17.68	28.48	20.12	4.14
CL786.Contig4_All	2	18.26	30.5	26.86	14.56
CL1399.Contig2_All	2	11.64	15.28	14.95	4.85
CL11244.Contig1_All	2	26.68	45.22	41.63	19.5
CL1968.Contig9_All	2	15.09	24.08	24.27	8.29
CL9450.Contig3_All	2	43.77	71.65	60.49	13.33
CL11105.Contig5_All	2	15.08	16.39	14.44	7.11
CL4109.Contig4_All	2	10.52	19.27	18.38	8.9
CL6563.Contig11_All	2	14.46	16.22	20.11	4.98
CL5563.Contig1_All	2	11.26	12.82	11.2	6.01
CL11709.Contig5_All	2	22.87	28.76	32.71	13.57
CL4425.Contig3_All	2	12.82	19.06	15.66	8.69
CL7274.Contig5_All	2	14.45	16.53	19.46	9.08
Unigene76487_All	2	14.81	23.87	21.47	9.73
CL12416.Contig6_All	2	11.04	14.88	13.18	5.36
CL8363.Contig3_All	2	11.85	18.34	13.39	4.95
Unigene1753_All	2	11.24	13.72	16.4	6.05
CL2347.Contig7_All	2	16.74	24.42	18.44	7.71
CL9610.Contig3_All	2	15.28	20.85	18.93	8.69
CL7907.Contig95_All	2	47.88	41.95	54.67	11.46
CL4153.Contig1_All	2	11.55	23.7	23.15	5.38
CL1365.Contig6_All	2	10.67	14.72	15.37	5.69
CL8734.Contig12_All	2	17.47	29.42	27.78	7.24
CL1408.Contig1_All	2	10.76	14.02	11.72	6.85
CL2089.Contig3_All	2	8.04	17.81	15.49	4.44
CL11539.Contig2_All	2	11.16	18.79	17	7.02
Unigene52692_All	2	16.95	17.34	17.74	8.84
CL5534.Contig3_All	2	7.31	14.63	13.44	6.6
CL3852.Contig1_All	2	11.05	13	12.38	4.31
CL3566.Contig4_All	2	12	18.65	15.17	7.64
CL2233.Contig8_All	2	12.56	22.85	23.6	3.54
CL8982.Contig2_All	2	13.58	26.2	22.89	10.28
Unigene65719_All	2	85.65	119.05	136.38	16.31
CL3772.Contig4_All	2	12.88	17	14.85	8.01
Unigene65372_All	2	11.54	16.8	13.49	7.49
Unigene46455_All	2	10.02	14.78	12.94	6.27
Unigene83666_All	2	35.88	160.68	142.31	16.2
Unigene19800_All	2	11.5	12.9	15.01	6.18
CL16741.Contig13_All	2	23.18	51.23	44.98	6.71
CL11364.Contig2_All	2	8.49	13.96	12.45	5.54
CL3337.Contig2_All	2	9.81	18.42	15.22	5.1
CL7497.Contig1_All	2	15.14	27.18	25.18	13.18
CL1223.Contig11_All	2	21.36	31.09	22.38	3.62
CL4824.Contig6_All	2	9.68	13.42	11.64	5.37
CL3927.Contig22_All	2	18.12	30.78	29.35	11.77
CL6793.Contig6_All	2	51.98	83.16	68.05	35.3
CL1236.Contig8_All	2	18.56	31.69	28.91	12.4
Unigene31715_All	2	16.08	28.24	29.65	8.56
CL653.Contig14_All	2	14.81	16.23	21.18	4.19
CL10531.Contig8_All	2	11.44	17.57	18.35	5.93
CL16127.Contig3_All	2	14.47	25.28	25.5	10.57
CL5155.Contig2_All	2	172.99	295.15	243.65	67.64
Unigene3786_All	2	39.4	54.4	53.69	15.5
CL15662.Contig6_All	2	20.21	46.93	42.41	4.07
Unigene1615_All	2	29.81	50.69	49.36	15.3
CL6203.Contig4_All	2	8.72	17.82	15.53	3.67
CL4778.Contig4_All	2	40.76	51.1	44.37	21.29
CL6784.Contig3_All	2	13.09	17.65	19.47	5.72
Unigene57874_All	2	15.23	27.61	27.36	11.62
Unigene46066_All	2	18.38	24.33	23.45	10.11
CL16802.Contig3_All	2	44.64	48.95	56.04	14.81
CL9027.Contig2_All	2	12.99	16.57	15.92	7.62
CL7772.Contig1_All	2	7.52	14.77	13.35	4.7
Unigene4969_All	2	11.47	28.71	24.31	5.36
Unigene20715_All	2	28.06	112.96	93.93	6.12
CL4832.Contig6_All	2	8.23	15.27	13.11	5.83
Unigene46271_All	2	19.91	29.45	24.24	13.82
Unigene65646_All	2	191.8	230.08	203.21	75.81
CL652.Contig2_All	2	34.09	91.79	94.5	4.42
CL10871.Contig1_All	2	25.56	27.58	33.85	11.09
CL12434.Contig1_All	2	13.19	23.14	18.62	8.26
Unigene6064_All	2	14.81	22.41	18.78	9.93
CL5840.Contig5_All	2	14.16	22.88	18.81	7.27
CL2966.Contig20_All	2	10.86	15.74	13.31	3.57
Unigene72072_All	2	20.03	41.97	41.99	12.14
Unigene3696_All	2	14.53	15.6	19.23	8.06
CL9992.Contig4_All	2	13.91	29	31.26	2.65
CL13302.Contig1_All	2	5.68	38.63	33.55	1.71
CL16446.Contig8_All	2	37.43	43.37	37.46	20.46
CL3193.Contig6_All	2	9.95	23.38	19.19	2.23
CL8869.Contig6_All	2	20.94	26.5	21.35	8.13
CL9538.Contig2_All	2	12.6	18.05	15.44	7.99
CL2188.Contig14_All	2	9.35	16.72	17.22	4.65
CL649.Contig2_All	2	71.32	151.75	122.09	34.62
CL8390.Contig16_All	2	20.97	28.61	27.67	10.81
CL3660.Contig1_All	2	21.12	33.39	29.39	5.72
Unigene65727_All	2	32.47	58	54.29	23.2
CL6850.Contig1_All	2	13.98	30.91	26.07	4.07
CL8725.Contig3_All	2	5.98	20.88	19.27	1.08
Unigene11987_All	2	9.73	15.3	11.65	5.04
Unigene49234_All	2	11.17	24.68	19.01	3.92
CL11148.Contig3_All	2	43.8	89.85	79.93	24.25
CL6105.Contig3_All	2	51.69	142.99	137.48	16.33
CL8974.Contig4_All	2	24.28	40.1	43.74	11.1
CL706.Contig1_All	2	8.48	15.3	12.75	5.96
Unigene65641_All	2	17.98	26.85	25.92	11.02
CL11156.Contig13_All	2	18.24	25.52	19.18	5.84
CL5648.Contig3_All	2	17.68	26.72	22.58	12.41
Unigene57795_All	2	12.42	24.9	23.04	10.83
CL6036.Contig18_All	2	10.42	20.41	15.91	5.11
CL4657.Contig2_All	2	8.66	13.67	14.23	5.61
CL6887.Contig13_All	2	9.69	15.51	13.32	7.52
Unigene41343_All	2	18.94	22.14	20.09	8.53
CL4487.Contig5_All	2	11.94	27.45	28.69	3.85
CL13320.Contig7_All	2	22.11	18.78	23.98	8.4
CL3837.Contig2_All	2	36.66	62.17	54.08	29.73
CL11118.Contig1_All	2	7.63	14.83	13.29	4.94
CL16638.Contig17_All	2	24.86	44.87	45.79	14.37
Unigene50607_All	2	18.27	33.94	28.55	12.53
CL3521.Contig5_All	2	12.29	15.38	12.41	7.49
Unigene46220_All	2	19.98	36.51	30.5	14.65
CL6421.Contig58_All	2	124.8	143.87	147.39	39.58
CL9500.Contig1_All	2	13.43	23.12	19.23	7.44
CL7987.Contig5_All	2	10.92	16.13	15.11	6.77
CL9326.Contig2_All	2	26.17	40.85	43.94	16.7
CL632.Contig22_All	2	7.37	21.64	19.35	6.67
Unigene54560_All	2	34.33	41.6	44.51	22.09
CL3519.Contig4_All	2	22.38	23.47	22.01	11.23
CL3051.Contig6_All	2	14.16	17.44	15.01	7.79
Unigene34541_All	2	40.59	129.7	118.33	7.49
CL6256.Contig3_All	2	14.91	17.87	21.79	4.98
CL11156.Contig11_All	2	30.52	41.63	39.9	15.19
CL12142.Contig19_All	2	33.24	31.98	40.03	10.16
CL14829.Contig1_All	2	18.81	24.81	23.84	11.88
CL2718.Contig1_All	2	7.29	16.94	13.06	3.57
CL7029.Contig7_All	2	8.57	16.68	12.95	3.74
CL6931.Contig6_All	2	13.06	19.89	15.21	6.56
CL5715.Contig4_All	2	8.31	18.34	17.12	3.21
CL786.Contig14_All	2	13.97	24.29	19.14	8.67
CL14537.Contig7_All	2	17.25	25.74	20.6	11.6
CL394.Contig35_All	2	9.76	26.26	24.03	5.15
CL7190.Contig2_All	2	11.14	17.66	14.17	6.36
Unigene57539_All	2	9.9	15.01	15.7	4.46
CL8285.Contig2_All	2	14.91	27.52	24.12	10.87
Unigene1693_All	2	46.89	67.73	64.26	28.97
CL6776.Contig5_All	2	20.59	32.74	27.06	14.28
CL12648.Contig1_All	2	15.25	26.06	24.61	11.37
CL6793.Contig7_All	2	28.54	41.33	36.22	19.94
CL2400.Contig18_All	3	123.66	43.16	32.06	69.34
CL1317.Contig48_All	3	81	40.46	82.49	68.38
Unigene24650_All	3	85.72	21.02	15.6	34.49
CL6465.Contig12_All	3	89.58	14.21	12.24	35.89
CL7290.Contig5_All	3	121.68	29.15	25.35	55.15
CL13185.Contig8_All	3	23.02	12.48	10.94	16.15
CL4098.Contig11_All	3	62.23	5.45	1.37	22.94
CL815.Contig19_All	3	29.14	5.9	10.18	16.48
CL4534.Contig10_All	3	35.04	7.04	3.79	16.54
CL3323.Contig5_All	3	211.16	103.25	107.5	154.94
CL8288.Contig3_All	3	40.39	18.52	19.43	26.68
Unigene53065_All	3	24.55	6.83	4.09	14.37
Unigene42218_All	3	48.73	29.46	24.07	33.71
CL3700.Contig9_All	3	50.39	5.72	6.68	21.34
Unigene15758_All	3	22.02	13.81	6.44	16.56
CL1992.Contig1_All	3	83.8	33.8	23.68	45.11
CL1935.Contig34_All	3	16.99	8.36	7.54	11.97
CL2955.Contig2_All	3	29.38	13.71	6.68	19.61
CL5456.Contig3_All	3	36.6	17.55	19.41	21.61
CL2955.Contig6_All	3	33.62	15.69	8.09	21.5
CL16038.Contig10_All	3	60.23	3.93	1.62	17.95
CL14977.Contig2_All	3	266.81	129.36	96.05	196.69
CL5429.Contig29_All	3	18.39	7.82	7.08	13.33
CL9118.Contig1_All	3	40.92	17.31	21.9	29.89
CL2330.Contig41_All	3	25.68	8.6	5.63	13.53
CL9260.Contig14_All	3	38.48	4.65	2.13	10.63
CL738.Contig27_All	3	181.46	78.9	81.3	94.01
CL16945.Contig9_All	3	37.92	18.56	19.74	29.93
CL660.Contig2_All	3	31.87	15.38	12.88	20.08
CL528.Contig10_All	3	75.24	40.12	25.99	54.53
CL15837.Contig5_All	3	20.47	7.4	5.15	11.21
CL7845.Contig2_All	3	27.63	7.77	8.21	17.55
CL2869.Contig18_All	3	46.71	15.28	16.36	31.9
CL738.Contig17_All	3	60.15	25.65	26.99	37.49
CL16965.Contig10_All	3	22.75	11.76	10.65	13.9
CL542.Contig2_All	3	149.37	88.34	57.12	104.77
CL5422.Contig1_All	3	100.63	38.77	34.34	72.51
Unigene38720_All	3	20.6	6.46	5.81	13.07
CL1225.Contig45_All	3	127.09	47.98	36.88	88.1
CL5288.Contig1_All	3	40.61	17.67	22.69	31.07
CL845.Contig11_All	3	16.48	13.54	8.13	13.9
CL1317.Contig19_All	3	38.78	17.63	23.47	30.28
Unigene54517_All	3	17.84	8.66	5.28	11.4
CL8611.Contig1_All	3	32.37	5.49	10.03	22.92
CL3630.Contig10_All	3	52.55	27.1	23.15	33.96
CL95.Contig34_All	3	191.35	76.98	109.89	122.89
Unigene40747_All	3	19.79	7.74	5.52	11.85
Unigene20659_All	3	665.35	268.29	268.35	437.8
CL82.Contig10_All	3	66.34	25.07	22.45	41.6
CL1140.Contig4_All	3	86.81	9.37	3.49	40.87
CL3646.Contig2_All	3	17.35	10.28	7.32	11.82
CL1898.Contig4_All	3	91.21	38.32	30.68	46.75
CL6438.Contig1_All	3	22.71	5.45	3.43	11.54
CL2788.Contig2_All	3	48.62	26.28	12.15	34.7
Unigene56512_All	3	29.77	3.32	2.93	13.83
Unigene50304_All	3	19.3	7.14	5.14	13.22
Unigene29138_All	3	34.22	5.49	3.66	19.18
CL14617.Contig26_All	3	200.86	93.13	55.25	120.11
CL1862.Contig3_All	3	45.58	12.64	12.53	32.17
CL2400.Contig1_All	3	67.22	24.12	20.24	36.83
Unigene50570_All	3	46.96	21.68	16.02	28.2
Unigene65652_All	3	40.53	4.8	2.38	19.04
CL1338.Contig13_All	3	150.79	58.79	107.45	119.08
CL5705.Contig1_All	3	59.79	27.58	14.95	37.8
CL7786.Contig5_All	3	20.28	6.56	13.64	14.01
Unigene31166_All	3	1738.05	489.93	427.41	862.8
CL10200.Contig1_All	3	25.91	11.53	12.02	17.56
Unigene53088_All	3	78.49	27.91	20.47	49.65
CL528.Contig3_All	3	27.39	19.46	12.69	21.67
CL95.Contig47_All	3	155.69	65.21	74.17	89.6
CL16383.Contig19_All	3	99.19	44.17	25.81	62.02
CL2869.Contig12_All	3	22.96	8.33	7.24	13.19
Unigene17925_All	3	48.22	12.97	16.5	26.53
CL1316.Contig3_All	3	47.62	22.17	27.03	38.67
CL2297.Contig5_All	3	59.76	23.81	17.7	38.82
CL8035.Contig2_All	3	27.13	6.16	5.3	12.51
Unigene57904_All	3	321.57	52.77	29.7	119.9
CL1717.Contig14_All	3	154.75	53.44	70.83	97.33
CL4496.Contig11_All	3	21.44	6.55	7.13	14.52
CL10173.Contig1_All	3	57.62	21.98	35.84	36.35
CL4303.Contig3_All	3	65.2	24.86	29.27	44.26
CL6562.Contig1_All	3	128.13	60.66	73.17	100.28
CL3053.Contig39_All	3	326.94	127.95	95.39	194.27
Unigene58276_All	3	146.81	46.91	30.84	70.89
CL1413.Contig17_All	3	29.37	14.33	18.95	19.2
Unigene60142_All	3	20.33	8.48	6.17	10.92
Unigene20512_All	3	14.94	8.76	6.42	11.11
Unigene27901_All	3	17.92	9.18	7.87	11.39
CL12045.Contig4_All	3	27.72	13.84	6.02	16.89
CL5426.Contig27_All	3	27.47	2.43	3	10.59
Unigene18999_All	3	16.27	7.13	15.73	9.05
CL3941.Contig28_All	3	18.6	7.8	14.3	11
Unigene23179_All	3	45.9	18.26	13.15	31.2
CL6438.Contig3_All	3	24.58	4.48	2.9	11.06
CL2411.Contig6_All	3	54.28	23.22	15.06	38.21
CL1862.Contig4_All	3	84.75	11.42	7.86	30.77
CL443.Contig24_All	3	34.48	17.73	16.35	26.24
CL16676.Contig2_All	3	154.04	22.36	15.44	67.82
Unigene41002_All	3	30.66	16.35	7.09	18.4
Unigene27998_All	3	30.18	14.04	10.19	17.95
Unigene42359_All	3	23.59	6.9	4.4	10.54
Unigene56529_All	3	31.07	5.82	4.82	16.76
CL3563.Contig4_All	3	35.7	15.11	15.28	23.64
CL16038.Contig15_All	3	164.14	32.15	29.64	81.25
CL4310.Contig11_All	3	23.76	10.73	7.32	16.12
CL3037.Contig7_All	3	426.04	292.91	190.07	338.89
CL14861.Contig5_All	3	26.6	17.17	8.82	18.8
Unigene7123_All	3	71.03	36.55	35.23	43.78
CL15837.Contig4_All	3	29.24	10.76	8.16	15.89
CL16901.Contig27_All	3	43.34	19.7	12.81	23.95
Unigene3713_All	3	44.41	8.37	4.7	15.35
CL1596.Contig11_All	3	20.73	7.08	7.37	13.51
Unigene34626_All	3	16.2	9.17	6.76	11.78
CL9384.Contig1_All	3	34	18.57	14.79	21.82
Unigene64097_All	3	22.25	12.97	8.88	16.73
Unigene13670_All	3	109.7	66.46	50.24	82.39
Unigene61041_All	3	30.74	9.67	8.75	17.14
CL1975.Contig3_All	3	25.37	11.01	9.5	17.31
Unigene20009_All	3	41.02	7.92	6.21	27.04
Unigene1679_All	3	35.62	20.91	16.86	28.43
CL729.Contig11_All	3	47.58	10.85	7.64	22.74
CL527.Contig2_All	3	39.7	15.09	13.62	23.29
CL5183.Contig25_All	3	220.47	35.28	15.27	73.03
CL5388.Contig1_All	3	38.17	8.49	4.18	19.39
CL16241.Contig1_All	3	20.81	12.2	7.95	15.14
CL6403.Contig4_All	3	274.67	135.91	155.99	161.43
Unigene54791_All	3	28	8.9	7.86	16.91
CL6590.Contig2_All	3	29.76	12.07	9.16	18.83
Unigene31746_All	3	31.22	8.87	5.89	14.39
Unigene72002_All	3	32.23	5.05	3.01	10.25
CL365.Contig4_All	3	129.12	30.05	31.41	65.95
CL9093.Contig4_All	3	87.17	29.1	28.12	57.4
CL12164.Contig3_All	3	58.92	21.7	44.03	39.07
CL6818.Contig2_All	3	52.97	7.62	9.44	29.55
CL13719.Contig2_All	3	18.94	9.79	8.65	11.62
Unigene60143_All	3	31.62	11	10.38	14.42
CL2900.Contig35_All	3	18.69	10.65	8.99	12.94
CL527.Contig1_All	3	26.51	9.34	14.34	20.78
Unigene46063_All	3	29.91	16.73	10	22.33
CL6674.Contig7_All	3	45.36	15.21	8.81	23.92
Unigene1794_All	3	47.49	17.74	11.95	27.89
CL3137.Contig18_All	3	44.78	14.76	12.74	27.12
Unigene999_All	3	36.35	1.17	0.59	16.05
Unigene61438_All	3	19.66	9.36	10.28	11.54
Unigene35176_All	3	37.87	16.07	11.4	26.99
Unigene759_All	3	30.25	1.7	0.68	12.51
CL4625.Contig8_All	3	24.17	4.26	2.5	10.82
Unigene37108_All	3	34.66	19.57	10.8	21.38
Unigene4592_All	3	27.18	5.18	3.43	14.38
Unigene31_All	3	89.66	43.71	40.23	58.32
CL5064.Contig6_All	3	79.65	9.02	5.39	21.13
Unigene42057_All	3	16.85	8.94	6.49	10.02
CL4303.Contig5_All	3	157.68	68.65	65.47	88.26
Unigene9241_All	3	406.69	242.6	196.99	297.38
CL7427.Contig3_All	3	74.8	33.32	27.76	41.99
CL13677.Contig1_All	4	49.15	39.59	70.78	98.84
Unigene38913_All	4	10.51	11.22	13.49	22.79
Unigene1661_All	4	46.02	39.32	73.35	93.34
CL1046.Contig57_All	4	10.24	5.61	10.08	22.99
Unigene10660_All	4	11.34	6.61	19.74	22.17
CL3404.Contig6_All	4	41.24	26.91	41.92	54.16
Unigene48420_All	4	52.75	49.49	64.16	116.46
CL2119.Contig70_All	4	11.74	12.85	16.72	23.62
Unigene65407_All	4	14.36	10.69	18.84	27.2
CL3536.Contig26_All	4	42.38	35.39	86.49	105.57
Unigene64285_All	4	202.91	141.73	228.68	356.98
Unigene63217_All	4	209.94	135.99	244.8	335.39
CL16095.Contig25_All	4	130.79	78.81	133.92	159.2
CL3524.Contig9_All	4	10.64	8.97	15.11	19.73
CL11260.Contig8_All	4	24.61	17.47	25.08	37.94
CL3521.Contig12_All	4	27.61	39.26	43.71	72.87
CL10065.Contig3_All	4	30.25	22.85	34.79	45.89
CL3586.Contig3_All	4	14.48	13.6	22.84	30.24
CL293.Contig12_All	4	91.46	69.83	151.08	182.89
CL3863.Contig7_All	4	4.7	6.16	13.47	33.25
CL2312.Contig1_All	4	28	41.39	47.62	61.79
CL4310.Contig23_All	4	30.51	23.1	35.38	104.58
CL3011.Contig8_All	4	362.04	281.77	468.8	595.66
CL2818.Contig15_All	4	15.44	11.97	26.89	31.84
CL5456.Contig6_All	4	77.39	47.82	82.48	116.65
CL894.Contig14_All	4	19.05	19.31	29.06	39.23
Unigene45337_All	4	14.83	8.65	19.62	27.04
CL14900.Contig8_All	4	47.24	47.01	79.11	114.67
CL12806.Contig1_All	4	24.98	18.06	27.59	39.64
Unigene42502_All	4	26.9	14.57	28.24	44.4
CL6642.Contig8_All	4	7.47	10.11	11.96	16.34
Unigene25906_All	4	178.22	100.73	190.15	253.13
Unigene95476_All	4	59.99	77.82	123.22	155.25
CL2622.Contig4_All	4	10.33	14.31	14.72	23.47
CL541.Contig18_All	4	53.88	42.78	91.56	101.27
CL5218.Contig11_All	4	25.06	24.72	40.73	57.59
CL5700.Contig2_All	4	9.57	6.85	14.5	20.55
CL1935.Contig10_All	4	9.71	6.81	13.16	15.44
Unigene83186_All	4	11.35	13.37	12.78	28.99
CL430.Contig11_All	4	13.43	14.55	22.48	29.44
CL2891.Contig1_All	4	6.13	7.45	13.15	20.25
CL1853.Contig5_All	4	282.69	242.32	395.08	565.35
Unigene15777_All	4	42.24	40.03	70.97	137.85
CL106.Contig7_All	4	7.58	6.09	11.65	18.99
CL7845.Contig4_All	4	49.52	37.32	53.02	80.38
CL6913.Contig11_All	4	4.6	5.84	6.9	36.43
CL8960.Contig8_All	4	94.36	83.3	133.55	213.33
CL1648.Contig49_All	4	185.81	118.93	191.64	243.47
CL5456.Contig8_All	4	33.07	21.22	45.36	71.72
CL1096.Contig56_All	4	8.77	6.26	13.15	17.93
CL15609.Contig4_All	4	46.78	30.53	50.05	63.7
Unigene75403_All	4	7.19	9.01	12.63	19.42
CL3300.Contig2_All	4	69.22	58.42	89.36	116.37
Unigene1061_All	4	6.05	7.28	13.95	18.44
CL2318.Contig1_All	4	9.77	8.86	14.02	21.47
Unigene46277_All	4	24.77	18.5	36.73	77.21
CL3379.Contig7_All	4	32.55	18.6	32.89	59.7
CL4640.Contig1_All	4	15.03	13.44	25.52	34.8
CL4836.Contig18_All	4	7.21	7.07	10.85	22.76
CL4331.Contig15_All	4	6.77	8.28	11.26	21.18
CL5769.Contig7_All	4	10.01	7.15	12.66	14.65
CL11562.Contig2_All	4	6.8	4.74	7.44	22.68
CL15523.Contig9_All	4	45.55	21.67	52.84	127.46
CL16574.Contig28_All	4	63.42	43.77	69.9	150.81
CL1878.Contig11_All	4	18.1	16.31	24.43	41.44
Unigene10725_All	4	10.42	8.96	15	18.91
CL738.Contig1_All	4	97.15	79.52	144.23	233.41
CL9496.Contig2_All	4	15.65	8.62	17.8	21.63
CL476.Contig12_All	4	13.69	20.75	30.69	58.9
Unigene7371_All	4	19.58	11.2	18.86	26.1
Unigene35859_All	4	7.94	11.6	15.36	34.06
CL1317.Contig17_All	4	206.33	155.86	408.03	570.5
Unigene90062_All	4	10.03	8.11	12.51	27.06
CL15160.Contig74_All	4	12.77	7.57	14.97	28.81
CL8332.Contig16_All	4	40.69	35.26	71.11	94.49
CL803.Contig15_All	4	41.46	31.76	74.83	89.9
Unigene73271_All	4	9.88	15.97	23.69	41.74
CL13121.Contig11_All	4	198.87	149.27	283.1	363.7
CL8332.Contig3_All	4	40.87	28.18	43.77	70.4
CL15908.Contig48_All	4	18.35	11.45	18.46	23.32
Unigene65734_All	4	39.04	52.4	48.3	95.14
Unigene33388_All	4	1821.78	1043.05	2056.67	2367.69
CL5531.Contig16_All	4	22.44	15.28	25.37	41.11
CL293.Contig30_All	4	22.02	34.77	60.47	90.62
CL353.Contig23_All	4	81.29	81.55	138.47	195.3
CL5583.Contig2_All	4	138.25	115.65	196.92	255.25
CL1847.Contig3_All	4	10.67	13.42	13.78	22.81
CL2055.Contig1_All	4	13.47	6.95	13.47	17.43
Unigene5250_All	4	9.87	9.16	17.18	20.49
Unigene40809_All	4	13.39	7.61	14.54	21.29
CL999.Contig3_All	4	5.15	8.03	11.78	18.44
CL8332.Contig4_All	4	21.04	19.65	38.94	48.48
CL7653.Contig6_All	4	55.68	38.82	61.27	130.74
CL7653.Contig21_All	4	21.48	14.14	21.53	48.91
CL7653.Contig26_All	4	35.59	31.06	41.52	147.16
CL2615.Contig27_All	4	9.06	6.78	10.67	27.48
CL9940.Contig4_All	4	13.4	10.15	19.54	22.22
CL3243.Contig31_All	4	11.52	8.57	16.31	21.64
Unigene38215_All	4	22.33	12.49	22.84	29.36
CL15916.Contig19_All	4	10.89	5.5	16.04	15.63
CL3646.Contig5_All	4	8.89	6.89	17.05	23.02
CL1338.Contig4_All	4	39.78	37.88	84.2	99.04
CL4323.Contig10_All	4	7.88	7.8	11.29	15.66
CL803.Contig16_All	4	23.09	16.64	33.53	47.03
Unigene8635_All	4	63.44	43.37	77.39	94.24
CL17171.Contig10_All	4	9.51	6.44	10.13	21.65
CL55.Contig40_All	4	9.23	7.31	23.08	30.66
CL1096.Contig103_All	4	74.93	50.64	176.6	223.18
CL293.Contig33_All	4	100.97	55.92	109.13	129.76
Unigene67912_All	4	12.67	7.18	13.29	18.35
CL2951.Contig7_All	4	31.21	14.96	40.68	66.31
CL2661.Contig1_All	4	402.5	331.77	694.77	951.53
CL206.Contig9_All	4	21.22	12.03	24.07	34.77
Unigene49426_All	4	8.72	12.82	18.32	27.01
CL782.Contig3_All	4	48.99	24.83	65.54	107.69
CL1462.Contig14_All	4	440.03	248.94	438.1	754.21
CL2392.Contig9_All	4	9.59	8.24	14.6	16.78
CL8533.Contig7_All	4	64.16	46.59	85.84	152.76
CL3380.Contig10_All	4	93.12	75.71	130.53	184.49
CL9202.Contig11_All	4	130.13	122.73	189.91	256.49
CL2668.Contig25_All	4	13.2	9.43	17.54	19.55
CL7317.Contig11_All	4	18.22	12.4	21.68	44.82
CL3958.Contig12_All	4	10.7	7.82	15.8	21.15
CL1338.Contig23_All	4	12.4	7.75	13.28	19.98
CL969.Contig15_All	4	49.99	25.5	50.58	81.09
Unigene65405_All	4	20.4	13.82	30.88	43.53
CL3615.Contig12_All	4	13.71	12.13	17.49	27.63
CL1479.Contig8_All	4	18.09	16.63	28.43	40.3
CL3380.Contig6_All	4	191.12	141.49	232.5	339.03
CL11294.Contig7_All	4	13.36	16.58	15.56	26.71
CL15916.Contig45_All	4	31.55	19.85	45.31	60.25
CL3786.Contig19_All	4	7.83	5.13	11.79	17.58
Unigene53155_All	4	7.99	6.9	11.8	15.05
CL7559.Contig8_All	4	27.7	12.37	35.99	69.17
Unigene53513_All	4	814.46	541.78	933.75	1710.03
CL16798.Contig14_All	4	6.49	6.6	12.4	18.08
CL16158.Contig29_All	4	19.49	12.94	31.47	50.21
CL1058.Contig40_All	4	21.43	15.91	28.32	90.33
CL10894.Contig1_All	4	20.05	13.42	20.7	30.15
CL6069.Contig9_All	4	88.43	65.85	98.18	143.69
CL2153.Contig1_All	4	2309.53	1729.17	4911.67	6702.5
CL1136.Contig9_All	4	17.68	16.39	40.1	55.93
CL8822.Contig1_All	4	20.27	14.44	22.8	33.64
CL465.Contig39_All	4	10.37	7.02	14.32	19.35
CL13684.Contig1_All	4	12.51	12.73	27.38	32.99
CL2900.Contig1_All	4	22.83	16.5	33.53	58.01
Unigene53512_All	4	11.87	12.05	17.27	41.67
CL1935.Contig5_All	4	11.42	7.82	11.17	15.95
CL1032.Contig9_All	4	10.34	6.24	11.78	16.57
CL15592.Contig1_All	4	19.9	16.02	29.78	36.65
Unigene24408_All	4	305.45	240.12	383.58	520.84
CL3194.Contig24_All	4	148.62	93.61	154.79	267.56
CL17229.Contig33_All	4	40.52	35.66	64.62	79.16
Unigene10129_All	4	26.24	43.07	87.36	124.2
Unigene14945_All	4	21.98	10.3	25.12	27.33
CL5390.Contig5_All	4	26.94	18.7	30.67	42.51
CL9825.Contig2_All	4	77.37	54.01	148.83	299.25
CL15812.Contig20_All	4	13.97	13.07	22.38	29.99
CL3630.Contig13_All	4	107.91	75.62	123.04	215.17
Unigene53514_All	4	88.58	97.2	147.86	184.79
CL14980.Contig2_All	4	12.14	12.08	14.76	26.42
Unigene92000_All	4	13.51	12.97	24.39	78.08
CL6522.Contig2_All	4	159.29	127.82	186.98	258.03
Unigene95465_All	4	19.58	18.86	24.44	75.56
CL2661.Contig2_All	4	154.81	113.88	180.41	274.56
CL5614.Contig1_All	4	99.52	70.07	105.63	183.1
CL5848.Contig22_All	4	9.5	7.7	14.52	19.88
Unigene27_All	4	72.38	62.78	101.09	139.43
CL8332.Contig27_All	4	32.29	27.3	50.86	60.14
CL17212.Contig7_All	4	8.17	9.21	15.14	23.12
CL1058.Contig42_All	4	51.01	81.61	148.98	404.06
CL10065.Contig4_All	4	28.4	23.57	39.48	58.32
CL13121.Contig18_All	4	27.19	22.92	41.42	46.23
CL843.Contig10_All	4	91.1	74.08	119.66	159.89
CL2900.Contig14_All	4	11.28	8.54	15.88	20.48
CL5196.Contig26_All	4	7.49	4	9.38	23.56
CL1046.Contig56_All	4	21.1	23.36	46.48	69.06
CL2880.Contig2_All	4	17.76	22.5	31.64	55.78
CL1940.Contig6_All	4	31.2	21.81	36.42	46.4
CL742.Contig2_All	4	40.57	25.62	59.14	59.31
Unigene53087_All	4	41.85	32.58	44.72	67.94
CL12621.Contig2_All	4	10.14	7.52	10.21	16.97
CL3844.Contig9_All	4	182.23	141.37	280.62	460.96
Unigene27183_All	4	10.88	11.42	15.53	27.19
CL15523.Contig6_All	4	77.87	33	95.35	181.65
Unigene14015_All	4	13.07	15.35	16.44	26.82
CL2153.Contig7_All	4	4316.15	3309.66	6219.92	9028.56
Unigene5893_All	4	8.13	7.25	12.91	15.03
CL13279.Contig5_All	4	20.49	17.13	22.19	40.76
CL5456.Contig5_All	4	20.37	11.34	23.13	30.69
Unigene35610_All	4	14.43	14.65	19.66	30.58
CL16101.Contig32_All	5	22.24	35.15	49.38	23.25
CL17008.Contig9_All	5	21.72	47.62	75.05	28
CL8391.Contig8_All	5	20.21	25.37	40.37	22.12
CL1168.Contig3_All	5	105.78	93.28	192.35	67.14
CL13301.Contig2_All	5	7.82	11.32	24.36	8.58
Unigene46488_All	5	52	81.7	120.83	49.95
CL17129.Contig13_All	5	9.36	11.59	18.18	6.58
Unigene51576_All	5	14.39	20.5	32.39	17.87
CL2275.Contig1_All	5	9.2	13.69	22.3	6.73
CL15796.Contig1_All	5	0.2	4.68	35.95	0.37
CL15028.Contig3_All	5	40.26	53.32	108.28	34.38
CL6630.Contig3_All	5	33.44	33.9	69.88	36.47
Unigene49248_All	5	19.12	26.36	38.25	20.71
CL11156.Contig9_All	5	25.91	50.81	94.6	57.56
Unigene32873_All	5	6.27	11.54	16.05	8.17
Unigene46329_All	5	8.19	15.15	23.78	15.28
CL7815.Contig4_All	5	8.1	13.74	25.3	7.03
CL7656.Contig2_All	5	44.55	61.36	98.21	55.77
CL13891.Contig3_All	5	5.59	11.12	15.6	10.9
CL11443.Contig12_All	5	10.09	13.28	22	8.47
CL10012.Contig4_All	5	6.62	11.23	15.62	9.06
Unigene14958_All	5	5.77	11.63	20.57	9.59
CL5447.Contig3_All	5	19.38	24.84	38.32	22.59
CL17089.Contig1_All	5	16.73	32.82	49.84	34.24
CL9671.Contig1_All	5	65.3	99.64	143.79	61.94
CL485.Contig41_All	5	7.98	12.52	17.03	9.06
CL6317.Contig14_All	5	9.03	15.71	21.9	13.62
CL593.Contig32_All	5	177.56	218.05	303.41	145.89
CL2787.Contig5_All	5	4.82	12.07	21.39	10.35
CL8943.Contig1_All	5	6.74	11.94	17.24	8.84
Unigene58009_All	5	25.28	32.35	50.77	23.59
CL161.Contig2_All	5	2.48	24.86	55.94	1.97
CL6630.Contig1_All	5	10.32	11.67	18.9	7.71
Unigene21800_All	5	9	16.8	25.17	14.67
CL7082.Contig5_All	5	16.33	21.67	36.83	23.93
Unigene15595_All	5	6.53	10.25	16.66	10.05
CL8200.Contig6_All	5	22.99	38.74	57.42	25.67
Unigene77854_All	5	8.81	13.08	18.66	9.85
CL1360.Contig1_All	5	17.47	19.36	47.94	16.47
CL4115.Contig4_All	5	9.23	15.63	20.72	12.12
CL16101.Contig35_All	5	54.58	85.56	152.19	65.47
CL2631.Contig2_All	5	15.9	9.53	35.57	18.69
Unigene38832_All	5	6.15	10.54	15.57	11.36
CL1833.Contig4_All	5	5.36	11.63	19.09	6.61
Unigene2776_All	5	12.22	20.03	51.85	19.98
CL3122.Contig14_All	5	25.39	16.73	48.14	25.95
CL5931.Contig1_All	5	59.4	85.7	136.5	78.89
Unigene77241_All	5	46.77	55.61	94.22	33.24
CL17121.Contig3_All	5	7	14.3	21.79	8.51
CL6204.Contig8_All	5	21.14	29.96	49.23	22.64
CL3009.Contig5_All	5	20.01	34.91	69.1	18.93
CL6312.Contig1_All	5	28.79	16.71	30.78	14.85
CL10173.Contig7_All	5	29.15	18.44	40.26	17.73
Unigene10527_All	5	63.32	97.34	133.95	74.58
CL7741.Contig5_All	5	44.21	55.84	87.41	33.01
CL15679.Contig31_All	5	17.56	59.94	112.78	44.94
CL1709.Contig14_All	5	9.86	13.69	26.32	5.33
CL16571.Contig4_All	5	5.19	13.47	21.2	7.19
Unigene24740_All	5	12.32	17.17	32.68	19.83
CL1994.Contig7_All	5	29.34	43.97	72.6	30.31
CL9671.Contig3_All	5	72.92	106.22	155.4	74.44
CL238.Contig2_All	5	13.16	84.89	171.21	5.32
Unigene1563_All	5	15.23	22.73	44.55	24.88
CL15693.Contig1_All	5	19.62	26.88	44.32	24.17
CL583.Contig1_All	5	55.2	79.97	118.51	64.32
CL3017.Contig3_All	5	14.11	19.27	27.62	11.97
CL669.Contig4_All	5	17.67	25.03	40.12	23.2
CL7088.Contig4_All	5	27.6	44.89	68.54	28.3
CL5740.Contig6_All	5	8.71	16.85	27.32	13.38
CL726.Contig2_All	5	10.66	7.27	16.67	5.88
CL367.Contig3_All	5	11.08	11.63	23.43	13.27
CL3927.Contig14_All	5	6.89	12.36	16.71	8.03
Unigene13691_All	5	18.44	22.61	40.28	16.71
CL13319.Contig1_All	5	28.86	62.88	132.22	18.58
Unigene33944_All	5	8.92	11.14	18.67	12.87
CL11369.Contig5_All	5	22.15	29.58	44.94	26.01
Unigene49625_All	5	48.23	66.12	101.07	54.77
Unigene76444_All	5	8.39	10.04	22.79	13.03
CL14450.Contig74_All	5	18.92	23.88	38.3	19.7
CL663.Contig7_All	5	9.15	16.99	27.36	7.69
Unigene46547_All	5	15.73	20.01	29.84	13.74
CL210.Contig36_All	5	8.01	9.99	23.86	12.71
Unigene50609_All	5	47.58	83.71	99.68	66.93
CL6734.Contig4_All	5	50.6	88.98	111.6	72.02
CL7786.Contig4_All	5	13.99	18.6	31.93	10.12
CL12534.Contig2_All	5	15.86	20.53	28.25	14.07
CL3066.Contig4_All	5	21.82	33.99	59.5	35.81
CL1783.Contig19_All	5	7.31	17.78	31.59	14.68
CL1380.Contig2_All	5	8.44	23.63	49.48	4.19
CL293.Contig13_All	5	145.4	72.75	221.96	134.56
CL10407.Contig2_All	5	5.97	18.33	25.67	11.66
CL7082.Contig3_All	5	18.32	33.39	51.91	19.29
CL5707.Contig6_All	5	29.43	41.67	75.29	45.56
CL669.Contig7_All	5	23.26	27.92	46.94	28.32
CL16429.Contig6_All	5	7.33	11.06	23.09	11.98
CL1999.Contig9_All	5	15.71	22.09	32.43	18.37
CL10448.Contig5_All	5	6.25	14.03	23.38	10.47
CL14273.Contig10_All	5	0.54	11.02	40.33	0.45
Unigene17940_All	5	21.09	15.11	31.57	17.09
Unigene1706_All	5	19.15	26.36	39.55	25.61
CL326.Contig16_All	5	2.25	16.31	34.21	0.58
CL90.Contig38_All	5	11.68	16.43	31.03	18.71
CL5740.Contig10_All	5	26.63	49.24	78.15	41.87
CL1100.Contig35_All	5	9.99	13.75	21.54	14.23
CL5740.Contig9_All	5	31.52	49.24	72.05	41.14
CL8442.Contig1_All	5	12.64	14.57	28.12	8.48
CL9027.Contig13_All	5	20.52	28.47	43.38	26.65
Unigene9650_All	5	143.59	194.6	443.96	256.77
CL15028.Contig4_All	5	67.37	95.92	193.53	57.34
Unigene12930_All	5	5.78	11.66	17.69	9.89
CL12436.Contig2_All	5	6.08	13.18	22.24	5.87
Unigene86384_All	5	22.99	27.83	41.36	18.64
Unigene35845_All	5	5.64	10.54	17.35	6.68
CL8470.Contig3_All	5	12.82	19.49	30.31	14.01
CL15796.Contig2_All	5	0.62	8.14	78.06	0.66
Unigene48937_All	5	27.18	25.12	52.41	30.77
CL663.Contig5_All	5	6.93	12.68	18.68	11.75
CL7656.Contig1_All	5	22.32	36.29	53.73	20.76
CL8353.Contig1_All	5	80.59	143.37	276.98	69.49
CL14498.Contig1_All	5	22.9	30.67	95.41	18.92
CL3271.Contig4_All	5	24.58	44.1	55.94	39.18
Unigene2309_All	5	11.41	15.54	28.65	18.89
CL7688.Contig1_All	5	15.61	20.47	36.55	10.71
CL8116.Contig4_All	5	681.2	1007.64	1617.1	670.58
CL2967.Contig2_All	5	53.61	85.62	112.1	80.3
CL7688.Contig5_All	5	12.11	21.23	30.38	19.53
CL6387.Contig19_All	5	11.14	17	22.87	12.66
CL9999.Contig4_All	5	13.75	17.49	25.19	12.57
CL14609.Contig4_All	5	10.99	18.42	34.51	15.14
CL6798.Contig4_All	5	10.58	16.14	21.5	16.99
CL10476.Contig2_All	5	97.4	137.92	202.67	122.03
CL1218.Contig8_All	5	10.47	13.27	18.85	8.6
CL2899.Contig3_All	5	58.32	90.08	122.3	89.77
Unigene65016_All	5	13.67	19.73	28.68	21.42
Unigene67993_All	5	6.16	10.23	14.66	9.45
Unigene46031_All	5	44.41	60.39	93.81	46.89
CL3064.Contig4_All	5	29.49	30.62	71.72	41.73
CL1547.Contig18_All	5	6.78	13.52	20.51	13.47
CL15631.Contig1_All	5	41.33	93.4	155.64	46.14
CL14661.Contig8_All	5	8.28	9.48	18.4	11.29
CL2222.Contig5_All	5	17.77	26.24	37.3	20.52
CL8391.Contig4_All	5	69	82.64	148.31	89.91
CL6722.Contig3_All	5	23.25	35.73	53.25	37.25
CL6572.Contig45_All	5	11.62	15.65	22.53	10.52
CL4457.Contig3_All	5	8.32	13.45	18.3	11.89
CL6375.Contig6_All	5	6.54	11.48	18.24	8.54
CL3699.Contig10_All	5	7.2	11.59	18.54	6.28
CL2480.Contig6_All	5	54.4	78.92	112.67	50.08
CL7772.Contig11_All	5	7.61	16.79	29.35	6.68
Unigene12460_All	5	28.05	22.01	43.19	11.51
CL161.Contig8_All	5	2.61	19.3	39.89	1.37
CL1168.Contig11_All	5	100.01	170.93	235.44	119.02
CL3434.Contig5_All	5	9.91	19.28	22.7	15.24
CL14273.Contig17_All	5	0.4	10.08	49.74	1.09
CL14312.Contig1_All	5	5.59	8.38	21.49	9.87
CL4571.Contig3_All	5	10.83	22.47	34.75	16.63
CL4033.Contig7_All	5	17.94	24.31	35.92	23.25
CL3122.Contig12_All	5	11.61	8.53	18.46	10.29
CL2880.Contig30_All	6	18.99	10.23	8.22	10.39
CL501.Contig17_All	6	281.27	126.06	72.48	103.58
Unigene57768_All	6	18.57	11.96	4.28	10.4
CL15411.Contig3_All	6	16.39	12.77	6.47	9.49
Unigene41048_All	6	157.83	75.65	29.65	66.84
CL2013.Contig18_All	6	23.87	17.53	3.67	10.97
Unigene6691_All	6	292.64	176.27	143.44	119.41
CL4227.Contig10_All	6	14.02	10.57	6.65	9.07
CL171.Contig16_All	6	41.81	36.09	14.41	24.61
CL593.Contig33_All	6	103.75	60.52	49.47	35.2
Unigene53999_All	6	22.52	17.42	10.94	16.11
CL16945.Contig1_All	6	28.04	14.27	10.52	8.72
CL8288.Contig2_All	6	20.49	10.93	7.36	6.24
Unigene35553_All	6	36.37	17.69	6.07	10.09
CL16798.Contig12_All	6	52.12	36.45	24.61	22.14
CL11690.Contig7_All	6	16.54	10.97	6.97	7.97
CL11866.Contig1_All	6	39.97	22.85	28.34	18.16
Unigene20696_All	6	94.78	11.06	2.15	13.32
CL8952.Contig6_All	6	26.8	18.53	10.89	13.06
Unigene50134_All	6	20.25	8.82	6.5	6.94
CL6318.Contig6_All	6	31.29	16.05	9.92	13.05
Unigene26827_All	6	21.2	15.67	9.59	15.86
CL10663.Contig3_All	6	133.46	92.32	33.46	58.44
CL171.Contig10_All	6	62.54	20.04	8.96	19.63
Unigene30696_All	6	23.25	14.48	8.86	12.7
CL1505.Contig26_All	6	22.84	12.19	6.29	11.26
CL11545.Contig2_All	6	192.14	116.39	90.01	71.17
Unigene50012_All	6	57.8	28.51	13.14	18.25
CL8442.Contig9_All	6	40.03	9.55	8.96	11.92
CL9384.Contig3_All	6	19.6	10.77	6.76	7.73
CL10576.Contig10_All	6	119.78	96.34	53.37	63.56
Unigene42290_All	6	21.4	12.8	9.98	11.8
CL12069.Contig26_All	6	100.77	52.65	29.49	40.18
CL501.Contig29_All	6	100.44	58.59	34.06	56.13
CL14020.Contig1_All	6	20.83	13.41	7.57	8.83
CL12069.Contig28_All	6	56.39	36.03	16.98	32.43
CL8360.Contig2_All	6	17.3	11.62	7.13	11.16
CL7573.Contig1_All	6	45.98	28.23	19.46	14.57
Unigene50460_All	6	1094.59	376.33	272.98	401.67
Unigene89910_All	6	451.09	276.85	179.04	263.07
Unigene33607_All	6	90.04	50.08	36.09	40.56
CL10208.Contig3_All	6	20.5	10.79	4.23	8.2
CL6328.Contig1_All	6	46.57	30.88	14.41	18.92
Unigene48533_All	6	45.69	31.18	21.96	31.28
CL501.Contig21_All	6	18.67	10.16	6.34	9.4
Unigene67918_All	6	147.97	94.58	52.39	73.09
CL14617.Contig15_All	6	213.83	165.64	98.14	120.28
CL10510.Contig1_All	6	98.3	54.13	38.99	43
CL1140.Contig3_All	6	23.91	11.53	5.18	8.85
Unigene36077_All	6	56.01	38.46	21.97	37.39
CL10491.Contig3_All	6	18.4	14.39	6.37	8.27
Unigene21_All	6	32.27	8.08	5.13	3.81
CL482.Contig5_All	6	33.87	16.08	12.28	13.86
CL660.Contig7_All	6	20.56	7.47	7.38	6.53
CL1439.Contig19_All	6	15.39	9.59	8.68	6.61
CL16847.Contig14_All	6	39.2	15.97	19.86	7.76
CL270.Contig4_All	6	21.69	12.57	10.19	7.4
Unigene57739_All	6	43.29	32.75	21.47	28.95
Unigene56801_All	6	26.53	9.51	1.97	9.76
CL6877.Contig4_All	6	16.57	12.49	7.45	12.44
CL4738.Contig9_All	6	193.6	51.05	37.53	40.44
CL2113.Contig5_All	6	43.95	22.67	12.78	23.81
CL1338.Contig12_All	6	30.6	19.24	18.81	15.2
CL4600.Contig12_All	6	94.59	28.26	24.41	27.96
CL12731.Contig1_All	6	18.43	12.97	7.92	7.68
CL5704.Contig25_All	6	19.89	14.32	9.05	9.47
CL4698.Contig5_All	6	29.86	14.55	6.85	14.58
CL14861.Contig7_All	6	26.84	20.5	9.46	18.89
CL17117.Contig14_All	6	56.96	40	27.59	30.75
CL16038.Contig35_All	6	70.43	11.6	2.24	12.09
CL1370.Contig2_All	6	38.64	19.79	4.85	12.08
Unigene33325_All	6	24.45	12.63	10.1	10.46
CL3195.Contig6_All	6	23.62	17.49	8.5	11.23
Unigene53089_All	6	58.89	24.84	13.99	12.28
Unigene25298_All	6	34.44	28.52	15.21	27.41
Unigene11360_All	6	653.4	27.81	3.11	40.32
CL5095.Contig12_All	6	87.95	51.88	36.22	46.39
CL14617.Contig3_All	6	175.04	85.31	51.08	94.35
CL2616.Contig16_All	6	43.35	25.09	12.37	21.41
CL7619.Contig2_All	6	246.41	134.24	147.65	95.93
Unigene48434_All	6	44.86	15.72	30.1	19.47
CL8132.Contig4_All	6	19.53	15.49	7.49	12.59
CL4267.Contig6_All	6	15.8	10.29	5.68	9.41
CL1898.Contig2_All	6	21.31	8.36	3.65	6.96
CL9301.Contig1_All	6	76.17	49.35	30.94	49.95
CL3840.Contig13_All	6	26.64	13.41	8.55	8.21
CL3451.Contig2_All	6	26	11.75	4.33	8.22
CL4419.Contig7_All	6	105.29	82.45	41.05	56.17
CL1439.Contig6_All	6	20.59	7.94	6.31	5.87
CL476.Contig6_All	6	40.98	16.03	8.61	12.01
CL13468.Contig1_All	6	61.89	23.54	10.28	7.98
CL13571.Contig2_All	6	30.55	16.45	13.31	11.25
CL15842.Contig1_All	6	102.67	53.79	47.13	34.29
CL4580.Contig1_All	6	32.27	14.98	9.03	14.1
Unigene65694_All	6	19.19	9.96	6.55	10.07
CL12069.Contig29_All	6	32.6	22.59	12.83	17.5
Unigene34119_All	6	133.28	30.92	10.35	24.13
CL5979.Contig3_All	6	27.17	9.63	7.94	9.44
CL16676.Contig3_All	6	60.88	23.15	16.5	27.43
CL7460.Contig1_All	6	74.81	54.99	35.83	45.95
Unigene5218_All	6	29.92	12.61	7.88	11.67
CL1670.Contig5_All	6	122.55	96.86	51.64	88.21
CL16038.Contig21_All	6	150.03	13.12	8.41	24.47
CL4915.Contig12_All	6	34.02	14.98	12.3	15.94
CL3349.Contig23_All	6	33.82	27.71	15.48	18.61
CL270.Contig1_All	6	41.5	18.93	20.49	18.66
CL10960.Contig3_All	6	18.81	8.44	6.91	9.65
CL16539.Contig2_All	6	24.85	16.05	11.34	13.61
Unigene20467_All	6	80.55	35.14	18.05	34.47
CL521.Contig61_All	6	222.46	92.29	60.26	67.61
CL95.Contig35_All	6	63.01	23.46	21.87	27.53
CL7941.Contig2_All	6	309.17	152.1	47.26	78.25
CL1058.Contig14_All	6	36.71	12.57	4.05	6.97
Unigene71031_All	6	36.23	22.11	14.14	17.73
CL455.Contig25_All	6	24.03	13.94	4.24	13.4
CL7015.Contig1_All	6	59.49	29.7	29.01	32.43
Unigene10708_All	6	57.55	21.77	13.9	22.14
CL12422.Contig3_All	6	15.24	12.12	6.62	9.14
Unigene4009_All	6	17.89	10.79	4.59	10.72
CL3840.Contig8_All	6	39.39	19.28	13.93	19.29
CL11545.Contig4_All	6	35.65	17.62	9.3	4.92
CL3451.Contig10_All	6	21.24	14.56	9.28	8.56
Unigene67694_All	6	36.46	23.36	11.74	16.56
CL2125.Contig5_All	6	21.38	13.31	8.79	12.01
CL16038.Contig24_All	6	143.3	3.89	0.55	21.67
CL277.Contig4_All	6	16.12	10.58	8.02	7.88
CL11545.Contig1_All	6	177.88	82.71	47.9	28.19
CL12.Contig29_All	6	37.95	17.87	14.84	17.05
CL8754.Contig3_All	6	141.16	59.95	63.69	62.49
Unigene65758_All	6	19.47	11.27	4.97	11.01
CL5979.Contig4_All	6	55.05	20.66	11.33	17.18
CL3603.Contig2_All	6	30.3	5.23	2.15	6.35
CL6177.Contig6_All	6	20.09	10.59	5.36	5.03
CL1147.Contig14_All	7	38.59	70.42	26.79	13.44
CL10316.Contig2_All	7	27.1	31.88	20.54	10.56
CL10037.Contig2_All	7	19.27	35.67	15.5	9.59
Unigene19343_All	7	15.1	26.84	13.27	6.74
CL6053.Contig1_All	7	9.12	16.93	8.23	6.64
Unigene46548_All	7	31.77	48.28	27.62	11.5
CL10768.Contig4_All	7	25.59	33.16	22.68	16.04
CL12416.Contig4_All	7	12.18	14.43	11.41	4.79
CL15605.Contig4_All	7	15.94	23.27	11.12	5.93
Unigene41282_All	7	14.92	17.46	13.4	8.3
CL3708.Contig9_All	7	13.78	17.04	10.33	8.16
Unigene820_All	7	16.42	20.84	14.15	9.84
Unigene95376_All	7	41.26	59.53	27.83	33.07
CL5876.Contig4_All	7	12.19	17.03	11.97	6.66
CL906.Contig34_All	7	11.86	17.64	9.45	6.41
CL5204.Contig6_All	7	24	32.89	16.45	14.56
CL13432.Contig9_All	7	11.91	18.68	11.64	8.35
CL7057.Contig4_All	7	22.86	34.7	21.92	13.2
CL12128.Contig1_All	7	55.65	72.22	46.93	19.23
CL14938.Contig1_All	7	49.07	80.42	47.89	22.97
Unigene57822_All	7	15.27	21.02	13.5	9.53
CL2103.Contig2_All	7	21.53	32.9	15.53	12.86
CL8100.Contig2_All	7	11.85	18.37	11.56	8.7
CL12277.Contig3_All	7	16	21.35	12.25	10.11
CL9273.Contig6_All	7	24.09	29.67	17.3	8.59
CL649.Contig5_All	7	16.31	25.29	15.61	6.27
CL1321.Contig1_All	7	19.15	26.51	13.04	12.23
Unigene54442_All	7	22.64	33.31	15.29	13.79
CL5994.Contig7_All	7	12.4	15.12	8.15	5.79
CL2830.Contig4_All	7	19.38	25.57	15.29	11.85
Unigene46370_All	7	181.5	241.43	118.59	174.6
CL8688.Contig2_All	7	14.96	23.65	14.65	7.65
CL65.Contig6_All	7	10.98	16.53	7.59	8.58
CL9310.Contig5_All	7	17.96	26.79	14.3	12.13
CL517.Contig19_All	7	8.8	16.62	7.29	13
CL5647.Contig13_All	7	22.11	28.95	14.67	7.58
CL2266.Contig3_All	7	10.6	16.66	11.1	6.23
CL3618.Contig20_All	7	12.92	23.65	12.08	4.03
CL9293.Contig1_All	7	21.84	25.83	13.45	11.36
CL9599.Contig2_All	7	14.8	25.16	15.43	10.47
CL510.Contig3_All	7	12.57	24.06	10.66	2.43
CL2473.Contig12_All	7	38.29	52.51	27.85	19.98
CL882.Contig39_All	7	32.47	33.19	13.65	22.23
CL5290.Contig15_All	7	13.52	20.61	11.87	8.76
CL13512.Contig3_All	7	11.3	14.81	11.34	7.12
CL5523.Contig6_All	7	33.61	52.07	26.37	11.24
Unigene48955_All	7	41.63	48.99	21.25	25.08
CL9883.Contig1_All	7	13.94	16.97	11.25	5.47
CL12772.Contig4_All	7	24.88	32.11	18.28	15.1
Unigene25468_All	7	15.27	27.82	12.87	0.9
CL2889.Contig2_All	7	45.76	55.77	26.74	20.29
CL8098.Contig4_All	7	12.22	15.6	9.36	4.94
CL15729.Contig2_All	7	12.18	17.43	6.38	4.28
CL11434.Contig3_All	7	11.65	19.73	9.79	6.08
CL17001.Contig3_All	7	68.24	104.94	63.73	18.33
CL7058.Contig5_All	7	16.45	20.07	16.18	9.62
CL6522.Contig1_All	7	26.86	34.93	26.43	15.68
Unigene60472_All	7	12.09	17.6	8.09	6.81
CL6888.Contig1_All	7	43.68	62.11	20.05	10.61
CL9273.Contig5_All	7	20.29	27.07	15.59	9.39
Unigene32444_All	7	11.29	17.48	11.68	5.7
CL4160.Contig1_All	7	20.12	27.99	19.16	11.29
CL2605.Contig1_All	7	22.24	27.89	17.75	9.26
CL2197.Contig7_All	7	34.9	52.27	27.1	15.99
Unigene46587_All	7	13.34	21.64	14.14	7.55
CL6888.Contig7_All	7	18.49	29.75	18.53	9.97
CL2197.Contig5_All	7	17.76	31.23	14.77	10.1
Unigene61544_All	7	49.27	127.35	48.69	12.03
CL7978.Contig4_All	7	32.99	53.35	10.88	10.66
CL17117.Contig2_All	7	56.95	65.6	30.41	26.05
Unigene38050_All	7	42.3	59.51	44.13	28.05
Unigene48967_All	7	13.03	19.91	9.03	10.1
CL16886.Contig2_All	7	37.67	46.39	21.13	11.87
Unigene65801_All	7	12.12	19.66	11.15	6.49
Unigene14501_All	7	11.44	15.24	8.65	5.3
Unigene65772_All	7	20.44	24.13	11.83	8.85
CL8363.Contig5_All	7	41.04	80.86	42.2	20.57
Unigene35703_All	7	14.87	16.98	11.93	7.35
CL10067.Contig2_All	7	14.83	23.59	15.93	7.35
Unigene15301_All	7	10.95	15.08	10.5	5.95
CL2423.Contig8_All	7	29.2	37.58	26.64	13.66
CL528.Contig4_All	7	21.36	26.49	16.46	6.98
CL2889.Contig4_All	7	188	331	171.1	106.23
CL526.Contig3_All	7	17.29	24.11	16.44	10.75
Unigene13784_All	7	15.76	18.09	12.01	4.43
CL706.Contig14_All	7	10.63	17.41	10.33	6.71
CL12458.Contig2_All	7	10.9	17.42	10.81	7.84
CL10067.Contig5_All	7	11.15	18.52	10.95	5.32
CL3987.Contig4_All	7	15.06	20.72	14.81	9.21
CL16472.Contig3_All	7	15.5	34.6	10.12	4.25
CL10576.Contig9_All	7	56.87	61.84	18.15	17.49
CL3521.Contig2_All	7	24.49	28.82	15.15	9.39
Unigene29972_All	7	17.69	24.73	17.7	10.8
CL11492.Contig1_All	7	16.83	28.28	11.95	4.52
CL10877.Contig2_All	7	13.45	17.41	10.88	8.4
CL6203.Contig8_All	7	18.89	30.93	20.12	9.32
CL5550.Contig9_All	7	9.38	20.18	9.25	4.18
CL3914.Contig9_All	7	11.45	17.29	11.22	6.32
Unigene20609_All	7	203.45	329.42	193.37	121.3
Unigene53882_All	7	13.78	22.6	12.81	6.71
Unigene46603_All	7	22.02	32.65	10.54	24.17
CL10484.Contig5_All	7	11.8	17.73	9.16	6.13
CL4754.Contig3_All	7	14.5	22.59	14.25	8.29
CL15084.Contig5_All	7	15.95	21.12	13.69	9.18
Unigene34355_All	7	16.49	39.69	15.61	7.74
CL15669.Contig2_All	7	13.38	15.15	10.47	6.75
CL11332.Contig3_All	7	14.31	25.02	12.13	10.04
CL5612.Contig1_All	7	18.37	32.1	19.04	12.48
CL2605.Contig5_All	7	46.66	75.72	43.97	16.62
CL7308.Contig1_All	7	14.71	17.9	8.93	3.23
Unigene64618_All	7	15.37	18.71	9.33	5.35
CL4315.Contig20_All	7	10.73	22.46	7.77	4.12
Unigene34138_All	7	25.83	36.87	25.46	14
Unigene34535_All	7	33.24	51.82	33.45	19.78
CL3141.Contig3_All	7	20.39	22.38	14.12	10.07
Unigene5992_All	7	28.09	37.66	28.81	15.79
Unigene1605_All	7	15.64	19.03	12.56	8.17
CL7978.Contig1_All	7	15.52	22.5	8.04	5.33
CL153.Contig5_All	7	32.28	49.16	23.15	11.97
CL1588.Contig14_All	7	11.16	14.28	9.82	6.02
CL4211.Contig1_All	7	109.42	176.8	101.68	34.74
CL13314.Contig5_All	7	11.55	15.43	7.5	6.1
CL1408.Contig2_All	7	10.47	16.05	10.23	7.55
CL2694.Contig1_All	7	11.43	17.24	11.75	8.45
Unigene983_All	7	17.4	19.35	6.59	5.73
CL2629.Contig3_All	7	9.67	19.48	9.02	7.24
CL3978.Contig4_All	7	18	24.28	13.02	8.04
Unigene42561_All	7	15.76	31.94	10.58	12.71
CL3618.Contig15_All	7	80.81	147.23	81.54	35.83
CL9366.Contig5_All	7	16.45	28.42	16.81	12.48
CL12113.Contig14_All	7	61.13	91.6	36.22	25.12
Unigene50584_All	7	11.01	31.24	2.22	2.61
Unigene54500_All	7	33.8	37.84	24.87	12.49
CL6601.Contig8_All	7	16.49	31.38	15.99	10.2
CL15598.Contig3_All	7	18.76	23.3	10.94	10.33
CL5523.Contig18_All	7	20.78	25.5	16.11	9.07
Unigene11995_All	7	35.73	50.66	32.53	15.84
Unigene1263_All	7	29.42	52.42	24.19	13.19
CL8198.Contig5_All	7	18.24	29.31	18.82	9.01
CL3672.Contig1_All	7	13.4	16.64	10.39	6.51
Unigene50618_All	7	15.68	19.83	7.26	6.78
CL5677.Contig3_All	7	19.14	34.46	15.97	13.27
CL4419.Contig2_All	7	28.94	35.64	23.88	16.6
CL3001.Contig5_All	7	10.85	15.35	10.89	7.3
CL14974.Contig19_All	7	10.71	15.71	11.18	5.78
CL5400.Contig13_All	7	15.3	21.51	14.12	10.51
Unigene4601_All	7	10.68	22.5	10.86	2.43
Unigene199_All	7	11.08	15.67	10.25	7.24
Unigene77842_All	7	22.97	35.61	23.57	16.91
Unigene61678_All	7	33.93	39.26	14.06	21.96
Unigene45898_All	7	22.37	30.96	23.01	11.9
Unigene44052_All	7	9.01	16.87	8.85	6.22
CL2262.Contig46_All	7	14.71	23.74	14.62	5.18
CL2232.Contig10_All	7	36.73	50.25	31.05	13.82
Unigene49351_All	7	17.58	21.4	6.87	8.6
CL8103.Contig2_All	7	10.23	20.92	9.11	2.86
CL8618.Contig10_All	7	19.39	26.3	16.71	7.4
CL9466.Contig1_All	7	14.42	20.9	14.55	6.45
CL2701.Contig4_All	7	10.35	16.72	8.87	4.96
CL5935.Contig8_All	7	20.54	26.93	14.3	12.36
CL3746.Contig1_All	7	10.77	15.8	10.28	7.52
CL9123.Contig5_All	7	14.89	20.15	7.71	8.42
CL2753.Contig1_All	7	11.33	16.74	10.94	7.79
CL16026.Contig3_All	7	13.92	19.92	9.97	5.35
CL5611.Contig2_All	7	10.87	15.69	10.75	7.46
CL10179.Contig1_All	7	10.78	19.01	8.71	4.62
CL3422.Contig5_All	7	17.19	23.51	12.64	6.31
CL14350.Contig3_All	7	26.66	34.71	20.94	10.38
CL3978.Contig2_All	7	16.1	27.85	16.95	9.15
CL3141.Contig5_All	7	10.68	15.84	8.21	6.46
CL5410.Contig11_All	7	16.61	23.63	17.33	8.77
CL2756.Contig6_All	7	20.34	22.44	11.08	6.74
CL6212.Contig1_All	7	14.39	21.57	13.5	9.75
CL5677.Contig4_All	7	10.62	19.97	7.29	7.08
Unigene40707_All	7	22.61	26.54	12.8	9.25
CL15463.Contig23_All	7	29.91	40.66	28.4	16.55
CL2423.Contig7_All	7	15.94	19.02	9.56	5.29
CL4599.Contig6_All	7	11.7	15.99	9.21	7.02
CL1176.Contig19_All	7	22.06	27.37	10.33	9.96
CL9315.Contig1_All	7	16.94	36.3	14.01	7.23
CL10024.Contig1_All	7	20.68	28.64	16.77	13.06
CL13119.Contig6_All	7	28.88	34.69	10.29	6.43
CL2627.Contig7_All	7	34.87	43.33	34.81	20.44
CL314.Contig21_All	7	129.25	140.1	56.95	59.75
CL1640.Contig2_All	7	14.57	23.72	13.43	4.8
CL9309.Contig4_All	7	12.28	20.65	11.29	5.21
CL3309.Contig2_All	7	11.47	18.61	10.45	4.59
CL10532.Contig1_All	7	21.55	32.7	22.32	9.84
CL11742.Contig2_All	7	13.37	18.2	13.01	6.13
Unigene1389_All	7	32.47	40.2	27.43	15.94
CL8022.Contig9_All	7	10.99	17.94	9.45	6.02
CL3789.Contig5_All	7	20.23	32.57	20.17	11.44
CL996.Contig19_All	7	14.05	15.71	9.5	4.19
CL14191.Contig4_All	7	14.62	16.66	13.17	6.77
CL6793.Contig2_All	7	30.91	47.57	30.58	22.46
CL15129.Contig1_All	7	23.82	44.83	15.55	13.41
CL2103.Contig3_All	7	18.11	26.93	17.97	9.32
Unigene1613_All	7	13.48	16.25	8.02	6.86
CL533.Contig8_All	7	9.52	23.03	10.29	4.2
Unigene57314_All	7	21.12	38.38	21.37	10.36
CL5505.Contig3_All	7	18.78	42.6	18.11	7.16
CL3037.Contig10_All	7	10.7	16.1	9.76	7.08
Unigene65654_All	7	20.65	40.96	17.36	13.65
Unigene1261_All	7	126.63	205.43	97.47	60.62
CL14614.Contig1_All	7	21.99	26.85	15.34	4.99
CL2505.Contig4_All	7	14.88	21.42	12.62	9.21
CL15453.Contig2_All	7	12.57	20.86	11	6.2
CL12249.Contig3_All	7	11.35	15.05	8.77	5.05
Unigene40806_All	7	19.27	22.08	11.2	10.18
Unigene65492_All	7	20.72	23.78	15.1	8.37
CL14188.Contig2_All	7	14.45	25.67	14	9.79
CL16095.Contig17_All	7	10.45	18.25	9.56	5.11
CL14556.Contig5_All	7	9.17	20.42	6.71	5.41
CL5410.Contig13_All	7	11.37	18.73	5.5	6.19
Unigene29873_All	7	11.91	19.92	11.59	3.33
CL164.Contig23_All	7	150.24	174.92	90.46	73.38
CL1697.Contig4_All	7	48.82	76.58	45.19	24.94
CL1697.Contig10_All	7	11.69	25.51	9.16	6.25
Unigene65614_All	7	13.81	15.71	11.28	6.83
CL7818.Contig5_All	7	59.21	63.48	32.89	29.33
CL5410.Contig10_All	7	17.39	21.1	6.65	5.45
CL2181.Contig5_All	7	14.84	21.23	12.43	6.45
CL9544.Contig5_All	7	16.71	19.81	15.3	9.59
CL6202.Contig7_All	7	31.01	40.97	24.85	8.15
CL1655.Contig4_All	7	15.67	22.43	13.89	10.58
Unigene27961_All	7	59.85	85.44	49.31	39.34
CL909.Contig8_All	7	10.2	17.58	9.23	4.48
Unigene38502_All	7	11.53	14.32	9.44	5.61
CL8160.Contig2_All	7	18.65	40.9	14.62	7.38
CL16038.Contig30_All	7	66.08	100.02	34.25	34.07
CL5733.Contig1_All	7	23.83	26.25	14.45	10.58
CL2822.Contig13_All	7	12.61	23.99	10.63	5.32
CL472.Contig16_All	7	23.09	37.18	18.92	9.65
Unigene9607_All	7	19.2	27.88	17.79	11.64
CL5351.Contig1_All	7	41.51	85.74	35.8	50.68
CL11810.Contig2_All	7	11.61	15.76	11.69	7.48
CL11151.Contig7_All	7	27.57	49.61	12.79	3.78
Unigene15584_All	7	21.28	30.13	21.45	13.87
CL9942.Contig3_All	7	19.07	19.88	8.1	12.11
CL5935.Contig7_All	7	26.45	39.79	22.87	15.11
CL2024.Contig11_All	7	63.52	96.15	59.42	44.29
CL164.Contig20_All	7	15.68	17.9	8.83	6.34
CL1176.Contig7_All	7	33.3	49.08	18.51	14.73
CL9159.Contig2_All	7	33.13	53.11	32.7	6.43
CL7709.Contig1_All	7	28.93	36.62	25.99	16.64
CL120.Contig9_All	7	11.15	14.75	8.96	5.67
CL9236.Contig1_All	7	182.3	291.55	109.29	152.55
CL2735.Contig6_All	7	16.85	20.73	10.23	8.29
CL16936.Contig16_All	7	17.95	39.52	15.64	14.52
CL15019.Contig1_All	7	30.18	42.88	23.63	9.96
CL3119.Contig3_All	7	11.16	21.04	11.27	6.44
CL12458.Contig3_All	7	12.65	21.49	13.2	8.65
CL9599.Contig3_All	7	12.06	22.57	11.69	7.94
CL5926.Contig5_All	7	22.19	30.53	20.82	14.76
CL9589.Contig6_All	7	14.33	24.99	14.89	7.87
CL8097.Contig2_All	7	15.98	28.98	12.91	9.11
CL9310.Contig4_All	7	16.86	27.47	15.7	11.81
CL16477.Contig3_All	7	13.49	23.35	12.15	5.85
CL10661.Contig1_All	7	13.73	25.02	8.72	3.16
CL5230.Contig1_All	7	15.2	17.67	9.66	4.53
Unigene40851_All	7	13.23	17.02	12.31	7.53
CL12069.Contig23_All	7	23.08	30.25	16.94	10.65
CL15040.Contig2_All	7	80.19	96.21	43.2	31.03
CL15773.Contig2_All	7	13.08	22.11	12.24	6.33
CL3825.Contig8_All	7	11.86	17.84	7.17	4.33
CL3717.Contig5_All	7	14.86	17.44	12.03	8.62
CL1233.Contig4_All	7	11.45	15.84	9.86	6.3
CL10569.Contig1_All	7	14.27	17.14	11.43	8.07
CL841.Contig3_All	7	128.15	210.69	123.2	55.48
CL12712.Contig53_All	7	12.73	19.46	12.39	8.09
CL15569.Contig2_All	7	22.23	34	22.42	16.33
CL7709.Contig4_All	7	22.78	38.39	22.76	16.44
CL1288.Contig3_All	7	10.71	18.86	10.03	7.38
CL2756.Contig12_All	7	20.5	28.83	9.16	6.02
CL2197.Contig8_All	7	23.24	43.96	22.08	16.03
CL8541.Contig2_All	7	11.3	13.64	9.82	6.59
Unigene62554_All	7	15.31	16.91	12.39	7
Unigene1667_All	7	13.55	20.61	13.7	6.92
CL10968.Contig3_All	7	12.92	16.28	8.76	7.81
CL8595.Contig23_All	7	12.32	20.41	10.94	6.21
Unigene42669_All	7	40.99	53.9	37.77	20.71
CL10316.Contig1_All	7	26.36	31.94	16.64	8.55
CL828.Contig20_All	7	39.96	48.87	31.41	18.91
CL12980.Contig3_All	7	12.55	17.44	8.15	2.93
CL7460.Contig4_All	7	26.58	32.82	16.14	13.36
CL12069.Contig17_All	7	22.02	24.67	11.29	7.69
Unigene44823_All	7	23.45	31.18	19.58	12.98
Unigene30335_All	7	14.9	17.1	8.56	8.02
Unigene1662_All	7	20.74	34.63	19.24	9.5
CL7192.Contig1_All	7	14.86	18.65	11.31	8.08
CL14073.Contig2_All	7	11.96	20.61	12.72	6.1
CL14644.Contig1_All	7	18.11	28.23	17.05	7.42
CL1176.Contig5_All	7	97.8	140.29	52.08	31.22
CL12659.Contig2_All	7	15.16	25.52	13.8	8.17
Unigene33584_All	8	28.54	29.3	14.76	9.9
Unigene12485_All	8	13.37	14.19	9.45	5.17
CL3125.Contig11_All	8	13.85	12.71	7.32	6.21
Unigene49149_All	8	161.01	121.99	87.76	46.33
CL8618.Contig6_All	8	24.79	26.76	17.83	9.99
CL6888.Contig5_All	8	21.79	17.56	10.4	7.18
CL12069.Contig11_All	8	25.54	26.33	12.71	12
CL4370.Contig22_All	8	43.44	46.13	25.93	18.97
CL4519.Contig1_All	8	13.81	14.79	11.41	6.43
CL5092.Contig1_All	8	14.2	9.23	12.92	5.72
CL17129.Contig6_All	8	23.6	24.15	15.1	4.73
Unigene54448_All	8	19.06	18.87	10.87	8.39
CL4583.Contig7_All	8	14.46	11.65	8.29	6.51
CL15812.Contig40_All	8	13.78	10.69	12.07	6.67
CL1314.Contig21_All	8	28.52	26.39	16.55	11.58
Unigene1666_All	8	15.37	13.63	13.45	7.31
CL10692.Contig5_All	8	57.53	39.47	27.88	18.41
CL12069.Contig27_All	8	21.12	21.59	10.46	12.44
CL482.Contig6_All	8	26.66	22.12	16.04	10.98
CL593.Contig19_All	8	59.64	49.37	51.81	29.63
CL7252.Contig9_All	8	39.43	31.04	16.98	12.13
CL270.Contig2_All	8	17.43	9.08	9.42	5
CL1419.Contig5_All	8	27.37	25.28	10.32	10.92
CL16901.Contig1_All	8	30.63	23.41	14.03	12.83
Unigene38049_All	8	13.25	12.26	9.66	5.82
CL6684.Contig4_All	8	13.6	14.44	11.62	3.98
CL5790.Contig3_All	8	12.84	13.24	8.52	6.26
CL13195.Contig1_All	8	33.58	30.3	17.63	6.51
CL14680.Contig9_All	8	35.72	23.34	27.22	17.44
CL13630.Contig1_All	8	20.51	20.59	12.31	7.33
CL6953.Contig2_All	8	95.97	81.01	38.47	16.92
Unigene56882_All	8	14.89	13.43	8.31	6.69
CL1021.Contig13_All	8	37.8	22.88	14.28	9.12
CL3988.Contig30_All	8	14.37	12.55	8.97	5.75
Unigene50594_All	8	19.28	19.98	12.47	4
CL9265.Contig3_All	8	22.3	20.97	15.09	7.84
CL485.Contig37_All	8	38.12	37	33.05	18.66
CL6575.Contig22_All	8	18.4	19.63	11.46	7.09
Unigene41856_All	8	16.31	16.08	12.36	6.31
CL4663.Contig5_All	8	31.82	22.71	15.12	12.06
CL14324.Contig4_All	8	16.48	16.43	11.13	7.5
CL3451.Contig38_All	8	131.63	99.53	69.75	61.86
CL2605.Contig2_All	8	35.51	29.66	24.94	10.51
CL6522.Contig9_All	8	19.59	20.11	15.65	8.31
CL593.Contig1_All	8	190.01	155.49	197.01	80.32
CL8574.Contig5_All	8	24.53	17.29	12.96	4.24
CL3404.Contig4_All	8	15.67	11.18	9.09	6.88
Unigene50526_All	8	23.82	23.48	13.25	11.17
CL1395.Contig7_All	8	23.91	24.13	12.4	9.99
CL3054.Contig1_All	8	20.94	15.83	6.21	3.85
CL12069.Contig14_All	8	27.11	28.34	13.37	11.05
CL12248.Contig2_All	8	24.13	19.73	14.07	4.36
CL751.Contig9_All	8	21.92	19.26	14.94	6.87
CL4871.Contig3_All	8	15.64	12.23	8.6	5.92
Unigene56495_All	8	21.81	18.45	14.07	10.47
Unigene12912_All	8	16.32	15.66	8.5	8.08
CL11673.Contig4_All	8	27.23	16.91	9.39	4.87
CL9231.Contig11_All	8	93.43	70.45	59.74	30.84
Unigene57892_All	8	14.1	13.83	11.95	5.43
Unigene44804_All	8	29.39	19.33	15.11	11.41
Unigene1044_All	8	25.7	14.23	14.07	6.68
CL4725.Contig15_All	8	19.99	18.2	15.17	9.45
Unigene50728_All	8	34.56	35.94	16.69	12.93
CL4871.Contig1_All	8	29.49	17.03	12.53	4.18
CL521.Contig43_All	8	21.16	15.49	7.27	6.67
CL15759.Contig1_All	8	21.15	20.51	14.83	7.19
CL1444.Contig5_All	8	23.68	19.34	3.45	6.85
Unigene1203_All	8	66.42	49.57	39.13	32.15
CL2756.Contig7_All	8	20.48	19.29	8.35	5.44
Unigene46261_All	8	13.81	14.74	9.75	6.3
CL10731.Contig3_All	8	31.08	24.39	17	8.46
Unigene46482_All	8	118.36	95.41	122.07	41.88
Unigene54330_All	8	44.53	37.1	21.88	23.43
Unigene49153_All	8	132.76	118.28	106.34	41.59
CL11697.Contig7_All	8	21.78	18.8	9.12	5.26
Unigene52317_All	8	26.18	18.14	9.83	6.16
CL7520.Contig4_All	8	34	28.91	17.83	13.03
CL2168.Contig24_All	8	39.12	24.26	21.48	14.31
CL10731.Contig5_All	8	41.26	36.21	19.38	11.29
CL15397.Contig1_All	8	67.44	60.18	46.99	22.36
CL12069.Contig33_All	8	68.92	67.96	33.09	32.69
CL4725.Contig14_All	8	14.19	12.25	11.11	6.97
Unigene30463_All	8	26.4	20.7	16.86	10.76
Unigene46497_All	8	17.11	11.61	10.31	7.34
CL318.Contig99_All	8	14.26	13.33	12.09	4.38
Unigene49346_All	8	29.27	30.66	15.07	8.65
CL1046.Contig14_All	8	16.72	10.8	8.97	5.37
CL751.Contig7_All	8	24.5	19.65	9.98	5.61
Unigene61753_All	8	96.1	61.53	68.2	40.32
CL4778.Contig2_All	8	20.39	17.61	11.08	4.5
CL3203.Contig14_All	8	13.56	11.89	10.1	5.43
Unigene71032_All	8	14.4	14.13	7.98	5.73
CL8425.Contig1_All	8	34.91	31.08	21.42	11.73
CL16901.Contig17_All	8	18.4	17.68	9.24	6.58
CL7306.Contig8_All	8	14.94	14.2	12.5	6.85
CL14812.Contig6_All	8	82.15	59.42	64.83	40.07
CL10500.Contig4_All	8	27.52	19.07	9.91	7.69
CL12748.Contig120_All	8	14.63	11.44	8.56	6.63
CL14804.Contig1_All	8	19.16	20.07	12.07	6.82
CL15397.Contig2_All	8	14.7	15.69	8.52	3.53
CL3130.Contig1_All	8	22.99	21.79	21.49	9.67
Unigene1436_All	8	16.04	14.87	7.85	4.24
CL12022.Contig3_All	8	18.62	14.11	8.75	7.14
CL122.Contig17_All	8	19.02	17.57	8.33	6.53
CL2493.Contig1_All	8	30.71	28.9	23.65	11.33
CL9548.Contig2_All	8	16.47	16.24	9.08	6.61
CL981.Contig7_All	8	104.7	77.28	64.9	36.91
CL1637.Contig2_All	8	16.01	14.49	5.87	7.66
CL2756.Contig8_All	8	31.9	33.93	17.92	15.08
CL3379.Contig6_All	8	29.81	24.64	18.92	14.47
CL11673.Contig3_All	8	35.23	20.29	9.65	4.4
CL6888.Contig4_All	8	109.59	95.15	53.76	42.92
CL1990.Contig2_All	8	20.48	16.5	12.28	9.79
CL3683.Contig2_All	8	13.83	13.47	8.43	6.43
Unigene59880_All	8	15.47	14.54	8.94	7.09
CL843.Contig1_All	8	136.56	111.92	97.67	53.3
CL6202.Contig6_All	8	28.77	30.29	21.96	6.08
Unigene50564_All	8	167.79	107.24	58.43	46.51
CL15397.Contig3_All	8	19.62	15.51	13.34	7.2
CL523.Contig6_All	8	18.01	17.66	10.24	8.92
Unigene61344_All	8	12.05	11.87	11.67	5.31
Unigene15650_All	8	24.32	21.56	11.92	13.79
CL2833.Contig8_All	8	56.64	56.39	50.84	26.94
CL9911.Contig4_All	8	167.57	111.39	82.35	51.22
CL420.Contig2_All	8	20.1	19.19	12.74	8.47
CL16217.Contig1_All	8	15.24	16.01	9.61	6.78
CL3459.Contig7_All	8	16.07	12.79	10.6	1.98
Unigene43547_All	9	14.6	25.95	17.02	11.04
CL1073.Contig3_All	9	14.22	22.95	18.31	10.16
CL5698.Contig6_All	9	15.24	46.17	25.48	7.72
Unigene1439_All	9	81.07	144.26	123.24	68.99
CL1522.Contig1_All	9	11.07	28.72	16.01	7.63
CL4251.Contig9_All	9	11.23	17.29	13.29	8.06
CL11183.Contig1_All	9	93.07	179.46	105.01	52.78
CL15501.Contig5_All	9	11.44	21.08	13.48	5.49
Unigene1616_All	9	30.78	70.42	43.91	17.53
CL11151.Contig1_All	9	26.58	47.9	28.71	19.97
CL3434.Contig9_All	9	15.21	24.71	19.77	11.99
CL5868.Contig3_All	9	32.98	56.26	45.35	24.2
Unigene32439_All	9	14.86	25.67	19.15	9.78
CL706.Contig3_All	9	9.99	17.79	13.2	5.68
CL16331.Contig4_All	9	7.89	18.37	11.37	7.4
CL6090.Contig3_All	9	6.34	14.83	10.05	9.57
Unigene38937_All	9	12.77	19.8	14.89	8.42
CL9173.Contig4_All	9	12.37	17.45	13.05	8.68
CL3005.Contig3_All	9	26.9	53.65	41.7	22.41
Unigene63995_All	9	16.72	35.18	20.74	10.83
CL3005.Contig5_All	9	15.38	31.25	24.6	12.38
CL4555.Contig6_All	9	6.89	16.27	13.21	5.59
Unigene50001_All	9	12.39	28.97	20.42	10.38
CL25.Contig10_All	9	10.53	19.49	16.45	9.62
Unigene38521_All	9	19.94	34.2	25.66	15.49
Unigene8746_All	9	96.56	165.37	109.76	39.58
Unigene58042_All	9	10.46	18.53	12.42	5.38
CL2707.Contig3_All	9	13.33	31.46	21.72	5.78
CL6658.Contig10_All	9	25.47	52.19	31.46	12.18
CL2738.Contig3_All	9	15.88	26.75	18.94	10.31
CL14188.Contig3_All	9	8.64	15.2	10.2	6.76
CL394.Contig26_All	9	21.57	64.93	36.6	9.42
CL4109.Contig10_All	9	22.74	37.98	30.14	16.78
CL12568.Contig5_All	9	10.29	20.14	14.69	5.75
CL4848.Contig3_All	9	11.21	20.29	13.93	9.4
CL3731.Contig2_All	9	14.57	34.29	19.42	6.48
Unigene34254_All	9	726.16	4820.45	2180.61	59.99
CL4418.Contig10_All	9	15.48	36	25.71	12.62
CL11266.Contig3_All	9	15.51	31.64	14.87	18.86
CL2181.Contig3_All	9	13.49	24.68	17.64	9.6
CL7191.Contig7_All	9	12.62	24.05	13.48	8.05
Unigene42342_All	9	31.86	60.7	35.3	23.07
Unigene54214_All	9	10.92	15.49	11.79	6.9
CL649.Contig1_All	9	38.37	64.43	42.68	18.21
CL4661.Contig3_All	9	19.45	34.98	23.11	10.3
Unigene50478_All	9	14.97	28.67	22.97	13.57
CL7528.Contig2_All	9	27.16	49.24	34.23	20.02
Unigene45872_All	9	11.78	20.8	12.79	6.81
Unigene65132_All	9	23.46	46.59	25.9	12.98
CL9959.Contig2_All	9	11.87	20.56	14.22	9.46
Unigene65422_All	9	17.03	25.73	20.26	11.71
CL9205.Contig4_All	9	14.44	28.83	17.43	9.46
CL8601.Contig3_All	9	11.63	31.38	26.62	11.03
CL3740.Contig6_All	9	13.41	26.2	15.71	7.92
CL6045.Contig8_All	9	10.4	15.42	11.86	7.16
CL16706.Contig3_All	9	8.71	17.82	9.3	7.78
CL13433.Contig4_All	9	31.67	61.48	42.67	25.58
CL9082.Contig3_All	9	14.91	28.86	19.16	12.29
CL16037.Contig1_All	9	23.15	47.34	26.4	11.69
CL13842.Contig2_All	9	8.16	17.07	13.39	5.13
CL8073.Contig6_All	9	22.9	46.67	29.84	15.17
CL2220.Contig5_All	9	16.93	32.49	19.68	10.1
CL6160.Contig1_All	9	6.94	30.57	12.09	3.99
CL8505.Contig3_All	9	7.29	23.7	13.66	1.31
CL1317.Contig3_All	9	10.94	21.32	15.57	8.54
CL12888.Contig3_All	9	32.63	70.3	47.43	20.81
CL16863.Contig2_All	9	8.31	17.44	9.47	10.03
Unigene37575_All	9	15.63	24.68	16.54	10.4
CL9755.Contig1_All	9	20.64	39.19	26.35	9.97
CL4163.Contig12_All	9	18.22	32.63	25.75	15.96
CL4158.Contig2_All	9	18.55	40.39	34.04	15.43
CL2163.Contig6_All	9	9.86	20.02	11.21	9.47
Unigene46476_All	9	10.26	20.04	11.62	7.28
CL3105.Contig11_All	9	25.15	42.53	27.64	12.13
CL10105.Contig2_All	9	18.3	39.87	20.76	12.79
CL7824.Contig1_All	9	16.58	78.78	27.53	4.74
CL16612.Contig11_All	9	20.67	225.54	148.67	1.87
Unigene54458_All	9	527.11	826.44	631.96	363.23
CL5959.Contig3_All	9	23.3	47.82	33.26	16.48
CL12952.Contig3_All	9	8.33	19.42	13.5	7.64
CL5814.Contig2_All	9	6.82	18.41	14.58	3.81
CL5007.Contig3_All	9	8.38	16.5	12.92	6.1
CL10162.Contig2_All	9	7.87	23.28	12.57	1.61
CL6112.Contig3_All	9	10.88	27.56	12.2	3.96
Unigene34005_All	9	10.88	19.27	13.36	8.03
Unigene69241_All	9	11	24.96	20.47	10.69
Unigene33717_All	9	24.06	39.74	31.2	15.96
CL8587.Contig4_All	9	8.3	18.32	11.51	3.09
Unigene26630_All	9	10.89	25.7	20.32	9.11
CL5847.Contig2_All	9	6.79	21.25	13.29	1.93
Unigene64948_All	9	16.73	29.82	21.47	10.14
CL13216.Contig1_All	9	6.79	20.77	12.64	2.93
Unigene38724_All	9	12.44	22.43	17.5	10.69
CL8366.Contig2_All	9	34.46	64.53	49.13	26.05
CL5576.Contig5_All	9	7.94	20.97	14.15	2.42
Unigene46508_All	9	77.98	118.58	89.72	56.38
CL8527.Contig15_All	9	10.7	19.89	11.69	6.61
Unigene3810_All	9	9.89	20.04	12.41	8.15
Unigene57430_All	9	9.42	19.6	13.46	4.8
CL12199.Contig1_All	9	10.69	19.47	15.2	8.5
Unigene38402_All	9	10.95	21.64	16.28	8.14
CL10442.Contig2_All	9	22.54	40.53	28.33	11.03
CL4077.Contig8_All	9	16.34	38.98	22.07	9.39
CL12069.Contig34_All	9	11.78	17.57	13.48	7.38
CL15769.Contig8_All	9	8.07	17.84	14.24	6.59
CL11244.Contig5_All	9	16.92	25.28	18.36	12.05
CL4546.Contig3_All	9	10.34	23.28	13.7	4.31
CL6820.Contig2_All	9	33.27	66.23	41.08	21.87
CL6119.Contig5_All	9	12.7	21.07	15.48	8.77
CL3481.Contig19_All	9	22.24	38.84	29.63	13.04
Unigene22067_All	9	11.11	19.58	14.6	7.19
CL3837.Contig3_All	9	21.99	40.35	30.33	13.36
CL6044.Contig1_All	9	8.47	33.35	12	2.73
Unigene1070_All	9	10.37	21.17	13.47	4.75
CL15195.Contig2_All	9	25.5	67.63	47.93	32.78
CL13319.Contig2_All	9	196.83	456.33	309.41	130.75
CL8595.Contig43_All	9	8.1	22.67	11.03	8.37
CL7560.Contig2_All	9	23.6	45.95	31.13	18.29
CL9014.Contig6_All	9	10.84	17	12.02	6.95
CL10889.Contig2_All	9	16.06	24	17.15	11.16
CL3026.Contig1_All	9	11.46	41.17	20.36	5.51
CL1432.Contig10_All	9	14.5	26.28	16.92	10.66
CL9275.Contig5_All	9	24.26	42.79	31.86	17.73
Unigene38791_All	9	3.77	29.73	20.73	0.25
CL10760.Contig1_All	9	8.7	18.42	13.17	13.3
CL2670.Contig1_All	9	9.79	14.34	10.53	6.31
CL8595.Contig21_All	9	11.21	20.93	12.2	6.53
CL14349.Contig1_All	9	8.14	14.1	11.52	6.77
Unigene10045_All	9	21.07	43.03	36.48	20.37
CL9038.Contig3_All	9	12.48	26.64	14.63	5.74
CL12608.Contig4_All	9	9.23	23.82	18.52	7.16
CL11244.Contig6_All	9	13.4	23.71	17.21	8.39
CL2843.Contig3_All	9	18.62	34.73	21.21	8.11
Unigene14191_All	9	6.52	16	11.85	7.63
Unigene50679_All	9	13.15	30.25	19.77	9.4
CL4963.Contig1_All	9	14.88	24.01	18.28	9.74
CL6850.Contig6_All	9	7.9	20.43	14.64	3.5
CL14484.Contig2_All	9	10.16	18.55	12.93	7.55
CL13249.Contig3_All	9	18.46	32.41	21.86	9.35
CL12154.Contig2_All	9	12	38.42	26.76	6.39
CL17075.Contig3_All	9	14.73	26.23	19.89	10.87
Unigene31608_All	9	8.78	17.54	12.11	3.52
CL1093.Contig3_All	9	8.13	16.34	14.21	11.44
CL10235.Contig3_All	9	15.07	27.74	16.85	11.93
CL129.Contig3_All	9	25.74	40.59	29.19	19.68
CL8688.Contig4_All	9	18.24	26.82	19.25	13.09
Unigene54511_All	9	7.46	17.79	15.41	8.33
Unigene30093_All	9	2132.57	17035.7	8580.17	249.94
CL15821.Contig3_All	9	10.16	19.58	11.73	7.01
CL4848.Contig5_All	9	18.51	32	22.74	13.21
CL9900.Contig9_All	9	7.77	15.37	13	6.29
CL12603.Contig1_All	9	13.74	25.84	19.76	7.79
CL2800.Contig1_All	9	20.16	33.61	23.67	13.81
CL11332.Contig2_All	9	11.2	22.38	12.56	6.13
CL12875.Contig4_All	9	31.36	68.34	36.23	17.85
CL17140.Contig8_All	9	6.4	36.86	21.97	1.61
CL12801.Contig1_All	9	15.74	29.25	23.27	13.92
CL6119.Contig2_All	9	9.4	15.96	10.74	5.59
CL9926.Contig3_All	9	9.51	17.02	13.19	8.13
CL6385.Contig6_All	9	61.34	127.9	94.19	42.21
CL3498.Contig1_All	9	7.93	16.24	12.89	8.47
CL5940.Contig6_All	9	13.59	23.86	17.81	9.14
CL14863.Contig1_All	9	21.37	37.47	26.33	17.87
Unigene42514_All	9	26.63	53.36	39.11	17.38
CL900.Contig3_All	9	9.83	14.95	10.71	5.43
CL16173.Contig11_All	9	11.26	20.46	15.53	7.67
CL9143.Contig5_All	9	6.84	16.41	13.57	5.69
CL9544.Contig7_All	9	17.55	29.59	19.61	10.38
CL394.Contig23_All	9	13.31	35.56	22.06	7.23
CL1062.Contig3_All	9	9.1	17.1	11.97	3.78
CL13622.Contig1_All	9	34.68	65.14	44.29	16.96
CL6053.Contig2_All	9	12.16	21.5	14.51	9.6
CL5550.Contig7_All	9	33.94	74.31	49.21	22.54
CL1506.Contig6_All	9	8.14	16.42	14.29	9.8
CL394.Contig19_All	9	53.44	130.07	75.93	17.22
CL10560.Contig5_All	9	11.43	25.69	17.46	6.58
CL6618.Contig10_All	9	1.59	21.27	17.98	1.12
CL11244.Contig9_All	9	24.53	44.48	39.28	21.96
CL7808.Contig2_All	9	7.19	15.61	13.02	5.2
Unigene50463_All	9	10.54	18.84	12.39	7.06
CL4985.Contig6_All	9	8.03	19.57	10.84	5.09
CL2181.Contig7_All	9	10.76	18.93	13.3	6.9
Unigene44814_All	9	19.27	39.41	31.59	19.79
CL6036.Contig8_All	9	21.41	44.47	27.55	6.79
CL12419.Contig2_All	9	14.34	26.56	19.22	8.96
CL1697.Contig6_All	9	23.79	48.17	26.66	15.84
Unigene1754_All	9	12.13	19.11	14.4	7.83
CL2494.Contig1_All	9	9.86	20.7	15.98	9.57
CL9143.Contig4_All	9	11.31	19.74	12.07	7.98
Unigene38756_All	9	21.48	35.18	25.87	13.9
CL16612.Contig5_All	9	1.66	23.62	15.03	0.44
CL11244.Contig8_All	9	15.1	25.58	16.66	8.53
Unigene49384_All	9	11.08	18.23	13.1	8.61
CL9275.Contig2_All	9	10.37	20.15	12.62	7.88
Unigene44818_All	9	126.43	209.29	170.61	95.73
Unigene61435_All	9	7.84	20.17	13.66	4.09
CL14099.Contig1_All	9	9.03	18.45	10.6	6.84
Unigene38404_All	9	12.95	23.86	18.24	9.85
CL3119.Contig4_All	9	11.6	18.36	13.01	8.51
CL10889.Contig3_All	9	7.63	15.62	12.68	9.99
CL12888.Contig4_All	9	24.41	48.62	28.59	17.46
Unigene16586_All	9	23	61.91	35.68	9.99
CL11883.Contig1_All	9	8.85	15.34	11.72	6.9
CL15948.Contig1_All	9	12.31	20.74	15.45	9.73
Unigene40853_All	9	13.89	22.73	16.3	9.13
CL9449.Contig7_All	9	16.72	28.79	19.09	9.17
CL13877.Contig7_All	9	25.83	56	42.26	22.66
CL3493.Contig13_All	9	32.86	54.96	40.41	20.45
CL2822.Contig14_All	9	7.97	18.32	13.14	5.72
Unigene46432_All	9	9.31	16.74	11.68	4.04
CL11883.Contig3_All	9	13.02	19.88	14.51	9.36
CL5624.Contig3_All	9	9.02	15.21	10.99	6.22
Unigene1588_All	9	11.49	22.69	15.3	8.15
Unigene53260_All	9	7.74	17.23	6.94	12.28
CL13462.Contig2_All	9	10.39	21.34	12.28	6.01
CL9205.Contig3_All	9	7.58	18.88	13.53	5.11
CL8198.Contig3_All	9	15.71	26.28	19.49	9.96
CL882.Contig50_All	9	15.98	31.7	17.44	8.4
CL909.Contig11_All	9	7.41	15.3	13.19	7.33
CL7475.Contig1_All	9	10.09	25.38	18.17	8.1
Unigene38248_All	9	12.01	19.61	14.49	9.64
CL3290.Contig5_All	9	10.87	17.71	13.92	7.72
CL3978.Contig1_All	9	16.68	38.26	22.36	8.1
Unigene6437_All	9	10.57	22.75	17.63	8.67
CL394.Contig20_All	9	191.81	322.11	243.19	126.65
CL4110.Contig42_All	9	4.31	23.74	17.78	4.08
CL7485.Contig4_All	9	9.07	14.62	10.14	6.3
CL12177.Contig1_All	9	12.93	25.73	16.42	5.67
CL1722.Contig9_All	9	41.65	68.37	52.21	27.77
Unigene1683_All	9	9.94	15.43	10.76	7.45
CL10861.Contig1_All	9	6.06	46	25.11	1.06
Unigene31716_All	9	9.64	18.45	11.68	2.98
Unigene1649_All	9	27.77	47.69	35	21.31
Unigene57631_All	9	7.26	16.01	10.48	6.92
CL4555.Contig5_All	9	11.23	21.65	17.12	9.16
CL16698.Contig7_All	9	8.16	17.19	10.86	8.6
CL11442.Contig5_All	9	11.29	26.43	16.93	7.88
CL16612.Contig10_All	9	1.73	22.75	16.15	0.44
Unigene61816_All	9	7.74	16.67	13.74	7.96
CL3105.Contig2_All	9	10.83	23.33	14.63	12.04
Unigene5260_All	9	9.9	16.06	12.57	6.82
CL1948.Contig4_All	9	11.56	17.78	14.38	8.43
Unigene86748_All	9	12.53	36.87	17.87	4.79
CL3736.Contig2_All	9	12.58	33.66	24.95	8.33
CL7379.Contig1_All	9	10.18	17.26	13.33	7.42
Unigene69423_All	9	11.17	21.32	17.48	10.02
CL1058.Contig47_All	9	47.02	149.77	76.92	20.81
CL8285.Contig1_All	9	15.73	26.95	19.61	9.98
CL10509.Contig3_All	9	14.67	26.82	16.37	6.37
CL16740.Contig46_All	9	10.11	20.36	15.08	5
CL11629.Contig3_All	9	9.21	17.61	11.05	7.04
CL6968.Contig2_All	9	10.96	22.29	18.12	7.73
CL2220.Contig7_All	9	22.24	42.97	32.78	16.1
CL8431.Contig4_All	9	11.55	22.85	16.87	10.72
CL16965.Contig6_All	9	13.8	26.12	17.28	12.46
CL15973.Contig2_All	9	6.47	28.4	7.05	7.52
CL9325.Contig8_All	9	14.79	23.42	19.27	11.44
Unigene38619_All	9	11.44	17.86	13.02	8.69
Unigene49233_All	9	5.26	23.6	17.09	1
Unigene29136_All	9	14.54	27.1	21.29	13.14
CL6888.Contig2_All	9	203.97	346.96	224.57	103.53
CL16580.Contig27_All	10	40.9	27.03	54.19	45.09
CL6471.Contig1_All	10	34.7	53.57	73.61	73.48
Unigene41344_All	10	18.95	19.95	42.08	36.11
Unigene4428_All	10	18.3	25.68	42.55	43.22
CL3879.Contig2_All	10	9.05	15.72	22.1	18.77
CL4993.Contig7_All	10	7.06	8.34	15.92	12.49
CL4858.Contig9_All	10	5.98	8.08	17.53	17.62
Unigene94838_All	10	12.39	13.5	25.25	17.95
CL948.Contig10_All	10	8.51	11.77	17.54	13.61
CL16659.Contig10_All	10	15.2	22.35	34.56	27.42
CL3964.Contig4_All	10	25.67	25.27	67.24	46
CL1286.Contig9_All	10	9.05	8.4	18.06	19.83
CL8255.Contig6_All	10	11.64	18.15	24.51	27.24
Unigene49261_All	10	6.14	9.4	14.72	11.91
CL1781.Contig40_All	10	14.98	11.75	27.66	20.47
CL9283.Contig3_All	10	11.66	6.94	35.59	17.94
CL7420.Contig2_All	10	35.12	52.09	73.82	61.13
CL16645.Contig30_All	10	4.72	8.22	19.83	21.92
Unigene38895_All	10	8.24	9.69	17.17	15.38
CL6201.Contig5_All	10	8.49	11.42	23.87	17.6
CL1191.Contig5_All	10	6.29	7.32	17.97	13.68
Unigene49249_All	10	10.57	14.89	23	17.27
CL4828.Contig4_All	10	23.34	16.32	38.13	26.2
Unigene59874_All	10	15.18	27.12	36.9	30.5
Unigene69246_All	10	11.1	15.63	30.64	23.55
Unigene66736_All	10	6.97	6.77	14.85	14.18
CL16596.Contig7_All	10	40.24	51.94	93.87	85.29
CL4466.Contig17_All	10	10.41	11.65	20.77	21.26
CL218.Contig23_All	10	6.58	10.4	17.5	20.64
CL3038.Contig1_All	10	7.2	9.3	16.14	14.58
CL4085.Contig1_All	10	10.3	13.07	20.04	21.77
CL17029.Contig33_All	10	10.24	13.31	25.78	24.78
CL12984.Contig3_All	10	5.79	6.04	27.23	14.89
CL7289.Contig8_All	10	6.36	8.51	14.41	10.8
CL15018.Contig3_All	10	16.89	15.83	28.98	31.6
CL4115.Contig1_All	10	43.82	52.18	96.28	97.94
CL2500.Contig14_All	10	8.08	12.59	25.77	19.88
CL950.Contig1_All	10	7.45	11.57	35.2	24.95
Unigene16914_All	10	12.4	20.55	31.97	33.23
Unigene49023_All	10	11.22	14.52	21.01	22.49
Unigene28788_All	10	11.39	12.48	27.66	19.44
CL1338.Contig17_All	10	7.19	8.19	15.46	14.58
CL8125.Contig7_All	10	8.34	16.1	18.06	15.59
CL8347.Contig2_All	10	79.61	97.11	172.58	122.05
CL8135.Contig9_All	10	9.32	11.71	23.41	27.46
CL2051.Contig16_All	10	111.12	145.9	381.3	395.46
CL8677.Contig7_All	10	8.77	11.82	17.85	17.26
Unigene1691_All	10	11.91	14.31	24.41	18.08
CL8112.Contig3_All	10	143.01	129.51	261.41	278.64
CL523.Contig14_All	10	21.78	29.46	46.8	41.34
CL1579.Contig23_All	10	11.69	12.11	23.24	16.36
Unigene1367_All	10	12.93	14.96	35.31	21.77
CL2051.Contig18_All	10	13	12.25	22.54	25.37
CL6630.Contig5_All	10	9.73	11.89	24.06	17.99
CL16941.Contig12_All	10	31.19	26.42	63.56	59
CL2500.Contig8_All	10	8.51	10.72	17.04	12.98
CL16668.Contig63_All	10	8.16	12.75	24.19	18.99
CL1166.Contig19_All	10	7.93	9.06	17.37	17.79
Unigene61550_All	10	13.39	16.67	29.57	25.89
CL11058.Contig6_All	10	8.34	9.82	17.5	14.84
Unigene14397_All	10	37.56	23.53	73.58	67.21
Unigene60041_All	10	8.7	11.81	15.39	17.72
CL3915.Contig1_All	10	6.65	11.44	13.72	14.92
CL1920.Contig2_All	10	7.95	13.31	16.11	20.44
Unigene19448_All	10	12.53	15.92	41	40.07
CL4370.Contig8_All	10	86.4	105.64	202.64	153.09
CL8195.Contig1_All	10	16.64	23.03	34.07	29.17
CL5775.Contig12_All	10	14.21	19.92	37.6	41.6
Unigene94626_All	10	6.17	7.9	21.87	17.49
Unigene1660_All	10	18.89	24.62	44.91	44.38
CL2051.Contig1_All	10	349.3	366.99	716.57	722.95
Unigene78913_All	10	6.51	8.69	12.96	12.63
CL1715.Contig5_All	10	11.91	12.14	22.44	26.12
CL464.Contig13_All	10	21.89	31.81	46.7	40.09
Unigene86733_All	10	19.02	13.95	39.72	30.41
CL14956.Contig14_All	10	71.74	81.01	148.78	167.68
CL8162.Contig7_All	10	86.83	99.81	175.83	147.06
Unigene80214_All	10	6.72	12.82	16.24	14.01
CL984.Contig61_All	10	10.07	22.71	40.51	35.98
CL945.Contig6_All	10	37.75	57.92	79.95	67.61
CL10956.Contig1_All	10	5.28	8.14	15.5	13.78
CL3889.Contig2_All	10	16.29	26.8	33.71	30.32
CL15391.Contig3_All	10	4.37	5.88	17.42	22.33
CL5727.Contig2_All	10	10.77	9.69	23.8	14.99
CL2747.Contig16_All	10	8.78	8.19	17.38	14.64
CL367.Contig19_All	10	5.13	10.59	11.77	14.16
CL1672.Contig9_All	10	127.95	118.37	242.62	269.24
CL13586.Contig2_All	10	3.16	6.54	20.01	23.85
CL5373.Contig5_All	10	8.3	11.62	16.52	13.45
Unigene17542_All	10	6.78	10.08	19.23	16.33
CL4470.Contig11_All	10	10.04	14.41	25.48	27.24
CL279.Contig3_All	10	12.27	18.7	26.78	29.57
CL1137.Contig15_All	10	9.22	11.84	20.81	16.02
CL1289.Contig2_All	10	7.53	12.41	16.36	17.14
CL1859.Contig25_All	10	8.11	11.25	18.97	14.18
CL3362.Contig78_All	10	5.62	8.65	13.88	14.77
CL10909.Contig3_All	10	22.32	27.35	56.32	65.76
Unigene63192_All	10	6.85	11.67	14.23	14.11
CL1547.Contig12_All	10	5.78	8.89	13.72	12.06
CL7317.Contig13_All	11	44.32	20.77	24.22	47.54
CL7230.Contig10_All	11	23.96	18.05	11.48	21.91
Unigene54469_All	11	1248.06	618.92	630.5	1196.05
CL16901.Contig23_All	11	62.61	16.45	14.64	45.53
CL11177.Contig2_All	11	32.95	9.31	4.03	33.99
CL3456.Contig1_All	11	32.94	10.84	6.47	27.36
CL11343.Contig4_All	11	20.56	3.92	2.81	15.08
Unigene11709_All	11	390.91	102.84	104.05	311.38
Unigene6678_All	11	127.15	51.32	46.3	125.33
CL777.Contig1_All	11	18.71	7.02	6.33	15.52
CL541.Contig20_All	11	17.81	6.77	10.81	15.37
CL7317.Contig2_All	11	34.91	15.07	15.8	39.89
CL1571.Contig15_All	11	243.87	90.07	72.07	212.67
CL2097.Contig1_All	11	20.07	6.82	7.07	22.03
CL1670.Contig3_All	11	15.8	9.25	1.74	16.33
CL1495.Contig4_All	11	85.78	26.15	26.91	87.63
CL17079.Contig13_All	11	23.64	4.48	2.26	18.96
Unigene48591_All	11	358.17	165.06	117.6	439.33
CL1507.Contig16_All	11	28.2	10.04	7.18	25.39
Unigene57841_All	11	14.73	9.99	7.04	13.48
CL15562.Contig3_All	11	105.65	49.88	53.23	98.61
Unigene33710_All	11	16.73	7.64	7.33	14.73
CL2838.Contig5_All	11	18.35	12.32	6.68	18
CL1046.Contig46_All	11	22.07	9.52	10.57	17.96
CL3397.Contig9_All	11	22.67	10.25	8.15	20.96
CL4976.Contig5_All	11	160.53	77.06	78.37	175.81
CL7131.Contig5_All	11	20.58	3.5	4.15	20.24
CL1495.Contig6_All	11	1263.78	524.46	577.56	1199.35
CL9345.Contig2_All	11	58.13	25.58	30.11	47.62
Unigene54566_All	11	38.27	7.06	1.42	36.87
CL13137.Contig5_All	11	81.64	22.63	11.77	56.43
CL3238.Contig5_All	11	17.31	7.1	6.48	20.17
CL323.Contig25_All	11	17.48	4.72	2.5	16.56
CL7131.Contig13_All	11	19.84	8.32	5.9	20.13
CL2202.Contig4_All	11	20.85	3.71	3.58	22.41
CL13137.Contig2_All	11	69.83	13.84	6.01	47.99
CL1946.Contig52_All	11	514.16	336.08	246.21	445.31
CL6913.Contig2_All	11	20.86	7.34	4.43	21.88
CL2784.Contig9_All	11	61.49	24.51	37.67	60.49
CL14195.Contig1_All	11	49.65	16.65	10.24	44.73
CL1083.Contig1_All	11	18.94	3.48	4.37	21.35
CL616.Contig21_All	11	280.85	13.08	8.13	203.02
CL9237.Contig5_All	11	23.41	4.61	9.1	23.81
CL4160.Contig4_All	11	21.08	20.05	8.89	18.94
Unigene20538_All	11	33.87	11.23	10.45	25.03
CL2617.Contig22_All	11	49.91	6.28	5.08	41.4
CL12126.Contig3_All	11	30.1	16.35	16.41	32.93
Unigene60353_All	11	143.09	46.83	57.14	116.85
Unigene30085_All	11	1018.98	653.51	437.08	917.35
CL13133.Contig7_All	11	16.85	13.43	8	16.77
CL2400.Contig2_All	11	55.6	20.71	19.04	42.15
CL15938.Contig9_All	11	146.69	80.62	51.06	131.92
Unigene1920_All	11	831.93	116.35	36.61	673.02
CL7093.Contig10_All	11	29.09	16.74	13.73	24.11
CL3186.Contig9_All	11	61.76	21.46	13.81	51.57
CL8533.Contig2_All	11	56.11	10.83	8.04	54.51
Unigene16457_All	11	28.19	6.6	5.01	19.61
Unigene58081_All	11	34.63	18.27	12.77	31.13
CL14227.Contig1_All	11	20.38	7.57	9.14	18.06
CL8044.Contig10_All	11	55.65	13.78	14.69	63.39
CL3165.Contig1_All	11	93.88	30.79	27.83	76.29
CL6300.Contig1_All	11	87.99	49.59	38.65	71.9
[truncated: 358 more rows]
