# Supplementary material for: Transcriptome-Wide Gene Expression Plasticity in Stipa grandis in Response to Grazing Intensity Differences
Source: Int J Mol Sci. 2021 Nov 2;22(21):11882. doi: 10.3390/ijms222111882 (PMC8611654; doi:10.3390/ijms222111882)
Supplement: Supplementary file 1 [file ijms-22-11882-s001.zip › Table S6. Transcripts Related to the Calvin¿CBenson cycle.xlsx]

## Sheet: Sheet1
Gene ID	CK_FPKM	LG_FPKM	MG_FPKM	HG_FPKM	log2(LG/CK)	log2(MG/CK)	log2(HG/CK)	log2(MG/LG)	log2(HG/LG)	log2(HG/MG)	Kegg Orthology	Nt	Nr	Pfam	Swissprot	GO
Rubisco
CL2153.Contig7_All	4316.15	3309.66	6219.92	9028.56	-0.378868	0.535467	1.07223	0.914335	1.45109	0.536759	K01602//ribulose-bisphosphate carboxylase small chain [EC:4.1.1.39]+ko01100//Metabolic pathways+ko00710//Carbon fixation in photosynthetic organisms+ko01200//Carbon metabolism+ko00630//Glyoxylate and dicarboxylate metabolism	AK358672.1 Hordeum vulgare subsp. vulgare mRNA for predicted protein, complete cds, clone: NIASHv1081F05	PREDICTED: ribulose bisphosphate carboxylase small chain, chloroplastic-like [Brachypodium distachyon] >KQJ81957.1 hypothetical protein BRADI_5g04080 [Brachypodium distachyon]	Ribulose bisphosphate carboxylase, small chain	Ribulose bisphosphate carboxylase small chain, chloroplastic OS=Hordeum vulgare PE=2 SV=1	GO:0015977//carbon fixation;GO:0009853//photorespiration;GO:0004497//monooxygenase activity;GO:0015979//photosynthesis;GO:0016984//ribulose-bisphosphate carboxylase activity;GO:0009507//chloroplast
Unigene18834_All	0.276667	0.283333	0.42	0.42	0.0290579	0.602489	0.612156	0.573431	0.583098	0.00966723	K01601//ribulose-bisphosphate carboxylase large chain [EC:4.1.1.39]+ko01100//Metabolic pathways+ko00710//Carbon fixation in photosynthetic organisms+ko01200//Carbon metabolism+ko00630//Glyoxylate and dicarboxylate metabolism	KT692644.1 Stipa lipskyi voucher Stipa lipskyi chloroplast, complete genome	ribulose-1,5-bisphosphate carboxylase/oxygenase large subunit (chloroplast) [Sporobolus helvolus]		Ribulose bisphosphate carboxylase large chain OS=Hordeum vulgare GN=rbcL PE=3 SV=2	GO:0000287//magnesium ion binding;GO:0019253//reductive pentose-phosphate cycle;GO:0009853//photorespiration;GO:0004497//monooxygenase activity;GO:0016984//ribulose-bisphosphate carboxylase activity;GO:0009507//chloroplast
CL2153.Contig2_All	526.727	356	523.423	608.467	-0.561962	-0.00260209	0.2137	0.55936	0.775662	0.216302	K01602//ribulose-bisphosphate carboxylase small chain [EC:4.1.1.39]+ko01100//Metabolic pathways+ko00710//Carbon fixation in photosynthetic organisms+ko01200//Carbon metabolism+ko00630//Glyoxylate and dicarboxylate metabolism	XM_015763923.1 PREDICTED: Oryza sativa Japonica Group ribulose bisphosphate carboxylase small chain A, chloroplastic-like (LOC4352016), mRNA	PREDICTED: ribulose bisphosphate carboxylase small chain, chloroplastic-like [Brachypodium distachyon] >KQJ81957.1 hypothetical protein BRADI_5g04080 [Brachypodium distachyon]	Ribulose-1,5-bisphosphate carboxylase small subunit	Ribulose bisphosphate carboxylase small chain, chloroplastic OS=Hordeum vulgare PE=2 SV=1	GO:0015977//carbon fixation;GO:0009853//photorespiration;GO:0004497//monooxygenase activity;GO:0015979//photosynthesis;GO:0016984//ribulose-bisphosphate carboxylase activity;GO:0009507//chloroplast
Unigene53513_All	814.46	541.777	933.75	1710.03	-0.585424	0.201596	1.07349	0.78702	1.65891	0.871891	K01602//ribulose-bisphosphate carboxylase small chain [EC:4.1.1.39]+ko01100//Metabolic pathways+ko00710//Carbon fixation in photosynthetic organisms+ko01200//Carbon metabolism+ko00630//Glyoxylate and dicarboxylate metabolism	XM_015763922.1 PREDICTED: Oryza sativa Japonica Group ribulose bisphosphate carboxylase small chain A, chloroplastic (LOC4352014), mRNA	PREDICTED: ribulose bisphosphate carboxylase small chain, chloroplastic-like [Brachypodium distachyon] >KQJ81957.1 hypothetical protein BRADI_5g04080 [Brachypodium distachyon]	Ribulose bisphosphate carboxylase, small chain	Ribulose bisphosphate carboxylase small chain A, chloroplastic OS=Oryza sativa subsp. japonica GN=RBCS-A PE=2 SV=2	GO:0015977//carbon fixation;GO:0009853//photorespiration;GO:0004497//monooxygenase activity;GO:0015979//photosynthesis;GO:0016984//ribulose-bisphosphate carboxylase activity;GO:0009507//chloroplast
Unigene84655_All	395.077	279.313	381.983	493.38	-0.484257	0.0101487	0.362285	0.494405	0.846542	0.352136	K01602//ribulose-bisphosphate carboxylase small chain [EC:4.1.1.39]+ko01100//Metabolic pathways+ko00710//Carbon fixation in photosynthetic organisms+ko01200//Carbon metabolism+ko00630//Glyoxylate and dicarboxylate metabolism		chloroplast ribulose-1,5-bisphosphate carboxylase/oxygenase small subunit [Triticum aestivum]		Ribulose bisphosphate carboxylase small chain, chloroplastic OS=Aegilops tauschii GN=RBCS PE=2 SV=1
Unigene53517_All	7299.47	5208.63	5390.77	7044.68	-0.480296	-0.414161	-0.0353538	0.0661346	0.444942	0.378807	K01602//ribulose-bisphosphate carboxylase small chain [EC:4.1.1.39]+ko01100//Metabolic pathways+ko00710//Carbon fixation in photosynthetic organisms+ko01200//Carbon metabolism+ko00630//Glyoxylate and dicarboxylate metabolism	CT830714.1 Oryza sativa (indica cultivar-group) cDNA clone:OSIGCSN038G03, full insert sequence	PREDICTED: ribulose bisphosphate carboxylase small chain, chloroplastic-like [Brachypodium distachyon] >KQJ81957.1 hypothetical protein BRADI_5g04080 [Brachypodium distachyon]		Ribulose bisphosphate carboxylase small chain, chloroplastic OS=Hordeum vulgare PE=2 SV=1	GO:0015977//carbon fixation;GO:0009853//photorespiration;GO:0004497//monooxygenase activity;GO:0015979//photosynthesis;GO:0016984//ribulose-bisphosphate carboxylase activity;GO:0009507//chloroplast
Unigene22582_All	8.78333	12.1133	12.35	9.14	0.464231	0.500659	0.0609026	0.0364271	-0.403329	-0.439756	K01601//ribulose-bisphosphate carboxylase large chain [EC:4.1.1.39]+ko01100//Metabolic pathways+ko00710//Carbon fixation in photosynthetic organisms+ko01200//Carbon metabolism+ko00630//Glyoxylate and dicarboxylate metabolism	KT692644.1 Stipa lipskyi voucher Stipa lipskyi chloroplast, complete genome	ribulose-1,5-bisphosphate carboxylase/oxygenase large subunit, partial (chloroplast) [Festuca rubra]	Ribulose bisphosphate carboxylase large chain, catalytic domain	Ribulose bisphosphate carboxylase large chain OS=Brachypodium distachyon GN=rbcL PE=3 SV=1	GO:0000287//magnesium ion binding;GO:0019253//reductive pentose-phosphate cycle;GO:0009853//photorespiration;GO:0004497//monooxygenase activity;GO:0009536//plastid;GO:0016984//ribulose-bisphosphate carboxylase activity;GO:0009507//chloroplast
CL2617.Contig54_All	1.75333	2.60667	1.23	1.25333	0.575152	-0.506928	-0.476293	-1.08208	-1.05145	0.0306342	K01602//ribulose-bisphosphate carboxylase small chain [EC:4.1.1.39]+ko01100//Metabolic pathways+ko00710//Carbon fixation in photosynthetic organisms+ko01200//Carbon metabolism+ko00630//Glyoxylate and dicarboxylate metabolism	XM_003574902.3 PREDICTED: Brachypodium distachyon VIN3-like protein 2 (LOC100831969), mRNA	PREDICTED: VIN3-like protein 2 [Oryza sativa Japonica Group] >BAD38597.1 putative coiled-coil protein [Oryza sativa Japonica Group] >BAD38062.1 putative coiled-coil protein [Oryza sativa Japonica Group] >BAF07832.1 Os02g0152500 [Oryza sativa Japonica Group] >EAY84508.1 hypothetical protein OsI_05883 [Oryza sativa Indica Group] >EAZ21771.1 hypothetical protein OsJ_05408 [Oryza sativa Japonica Grou…	PHD - plant homeodomain finger protein	VIN3-like protein 1 OS=Arabidopsis thaliana GN=VIL1 PE=1 SV=1
CL2153.Contig3_All	937.12	542.377	575.353	927.33	-0.780475	-0.670387	0.00689658	0.110087	0.787371	0.677284	K01602//ribulose-bisphosphate carboxylase small chain [EC:4.1.1.39]+ko01100//Metabolic pathways+ko00710//Carbon fixation in photosynthetic organisms+ko01200//Carbon metabolism+ko00630//Glyoxylate and dicarboxylate metabolism	XM_020322576.1 PREDICTED: Aegilops tauschii subsp. tauschii ribulose bisphosphate carboxylase small chain clone 512 (LOC109763713), mRNA	Ribulose bisphosphate carboxylase small chain PW9, chloroplastic [Aegilops tauschii]	Ribulose bisphosphate carboxylase, small chain	Ribulose bisphosphate carboxylase small chain A, chloroplastic OS=Oryza sativa subsp. japonica GN=RBCS-A PE=2 SV=2	GO:0015977//carbon fixation;GO:0009853//photorespiration;GO:0004497//monooxygenase activity;GO:0015979//photosynthesis;GO:0016984//ribulose-bisphosphate carboxylase activity;GO:0009507//chloroplast
Unigene2835_All	6.01333	5.46	9.44667	16.7133	-0.119874	0.708968	1.51841	0.828842	1.63828	0.809439	K01602//ribulose-bisphosphate carboxylase small chain [EC:4.1.1.39]+ko01100//Metabolic pathways+ko00710//Carbon fixation in photosynthetic organisms+ko01200//Carbon metabolism+ko00630//Glyoxylate and dicarboxylate metabolism	XM_020322576.1 PREDICTED: Aegilops tauschii subsp. tauschii ribulose bisphosphate carboxylase small chain clone 512 (LOC109763713), mRNA	RecName: Full=Ribulose bisphosphate carboxylase small chain, chloroplastic; Short=RuBisCO small subunit; Flags: Precursor >CAA58150.1 rbcS gene [Aegilops tauschii]		Ribulose bisphosphate carboxylase small chain, chloroplastic OS=Aegilops tauschii GN=RBCS PE=2 SV=1
CL2153.Contig5_All	15620	12169.8	17413.1	22542.2	-0.356214	0.164605	0.536325	0.520819	0.89254	0.37172	K01602//ribulose-bisphosphate carboxylase small chain [EC:4.1.1.39]+ko01100//Metabolic pathways+ko00710//Carbon fixation in photosynthetic organisms+ko01200//Carbon metabolism+ko00630//Glyoxylate and dicarboxylate metabolism	FP096049.1 Phyllostachys edulis cDNA clone: bphylf023p04, full insert sequence	PREDICTED: ribulose bisphosphate carboxylase small chain, chloroplastic-like [Brachypodium distachyon] >KQJ81957.1 hypothetical protein BRADI_5g04080 [Brachypodium distachyon]	Ribulose bisphosphate carboxylase, small chain	Ribulose bisphosphate carboxylase small chain, chloroplastic OS=Hordeum vulgare PE=2 SV=1	GO:0015977//carbon fixation;GO:0009853//photorespiration;GO:0004497//monooxygenase activity;GO:0015979//photosynthesis;GO:0016984//ribulose-bisphosphate carboxylase activity;GO:0009507//chloroplast
Unigene53512_All	11.8733	12.0467	17.2667	41.6733	0.0382499	0.580554	1.84331	0.542304	1.80506	1.26275	K01602//ribulose-bisphosphate carboxylase small chain [EC:4.1.1.39]+ko01100//Metabolic pathways+ko00710//Carbon fixation in photosynthetic organisms+ko01200//Carbon metabolism+ko00630//Glyoxylate and dicarboxylate metabolism	AJ131738.1 Secale cereale mRNA for hypothetical protein, clone 9	ribulose bisphosphate carboxylase small chain PW9, chloroplastic-like [Aegilops tauschii subsp. tauschii]		Ribulose bisphosphate carboxylase small chain, chloroplastic OS=Aegilops tauschii GN=RBCS PE=2 SV=1
CL2617.Contig18_All	2.83333	2.87333	1.46	1.15333	0.022026	-0.946191	-1.29133	-0.968217	-1.31336	-0.34514	K01602//ribulose-bisphosphate carboxylase small chain [EC:4.1.1.39]+ko01100//Metabolic pathways+ko00710//Carbon fixation in photosynthetic organisms+ko01200//Carbon metabolism+ko00630//Glyoxylate and dicarboxylate metabolism	XM_003574902.3 PREDICTED: Brachypodium distachyon VIN3-like protein 2 (LOC100831969), mRNA	PREDICTED: VIN3-like protein 2 [Oryza sativa Japonica Group] >BAD38597.1 putative coiled-coil protein [Oryza sativa Japonica Group] >BAD38062.1 putative coiled-coil protein [Oryza sativa Japonica Group] >BAF07832.1 Os02g0152500 [Oryza sativa Japonica Group] >EAY84508.1 hypothetical protein OsI_05883 [Oryza sativa Indica Group] >EAZ21771.1 hypothetical protein OsJ_05408 [Oryza sativa Japonica Grou…	PHD - plant homeodomain finger protein	VIN3-like protein 1 OS=Arabidopsis thaliana GN=VIL1 PE=1 SV=1
CL2153.Contig4_All	1132.09	753.847	869.58	1211.33	-0.583604	-0.365245	0.103303	0.218359	0.686907	0.468548	K01602//ribulose-bisphosphate carboxylase small chain [EC:4.1.1.39]+ko01100//Metabolic pathways+ko00710//Carbon fixation in photosynthetic organisms+ko01200//Carbon metabolism+ko00630//Glyoxylate and dicarboxylate metabolism	FP096049.1 Phyllostachys edulis cDNA clone: bphylf023p04, full insert sequence	PREDICTED: ribulose bisphosphate carboxylase small chain, chloroplastic-like [Brachypodium distachyon] >KQJ81957.1 hypothetical protein BRADI_5g04080 [Brachypodium distachyon]	Ribulose bisphosphate carboxylase, small chain	Ribulose bisphosphate carboxylase small chain, chloroplastic OS=Hordeum vulgare PE=2 SV=1	GO:0015977//carbon fixation;GO:0009853//photorespiration;GO:0004497//monooxygenase activity;GO:0015979//photosynthesis;GO:0016984//ribulose-bisphosphate carboxylase activity;GO:0009507//chloroplast
CL2617.Contig2_All	3.23667	3.42333	3.53667	0.896667	0.0823223	0.134739	-1.84629	0.0524163	-1.92862	-1.98103	K01602//ribulose-bisphosphate carboxylase small chain [EC:4.1.1.39]+ko01100//Metabolic pathways+ko00710//Carbon fixation in photosynthetic organisms+ko01200//Carbon metabolism+ko00630//Glyoxylate and dicarboxylate metabolism	XM_003574902.3 PREDICTED: Brachypodium distachyon VIN3-like protein 2 (LOC100831969), mRNA	PREDICTED: VIN3-like protein 2 [Oryza sativa Japonica Group] >BAD38597.1 putative coiled-coil protein [Oryza sativa Japonica Group] >BAD38062.1 putative coiled-coil protein [Oryza sativa Japonica Group] >BAF07832.1 Os02g0152500 [Oryza sativa Japonica Group] >EAY84508.1 hypothetical protein OsI_05883 [Oryza sativa Indica Group] >EAZ21771.1 hypothetical protein OsJ_05408 [Oryza sativa Japonica Grou…	PHD - plant homeodomain finger protein	Ribulose bisphosphate carboxylase small chain A, chloroplastic OS=Oryza sativa subsp. japonica GN=RBCS-A PE=2 SV=2
CL2617.Contig53_All	0.213333	0.136667	0.06	0.0533333	-0.652829	-1.85896	-1.99924	-1.20613	-1.34642	-0.140281	K01602//ribulose-bisphosphate carboxylase small chain [EC:4.1.1.39]+ko01100//Metabolic pathways+ko00710//Carbon fixation in photosynthetic organisms+ko01200//Carbon metabolism+ko00630//Glyoxylate and dicarboxylate metabolism	XM_003574902.3 PREDICTED: Brachypodium distachyon VIN3-like protein 2 (LOC100831969), mRNA	PREDICTED: VIN3-like protein 2 [Oryza sativa Japonica Group] >BAD38597.1 putative coiled-coil protein [Oryza sativa Japonica Group] >BAD38062.1 putative coiled-coil protein [Oryza sativa Japonica Group] >BAF07832.1 Os02g0152500 [Oryza sativa Japonica Group] >EAY84508.1 hypothetical protein OsI_05883 [Oryza sativa Indica Group] >EAZ21771.1 hypothetical protein OsJ_05408 [Oryza sativa Japonica Grou…	PHD - plant homeodomain finger protein	Protein VERNALIZATION INSENSITIVE 3 OS=Arabidopsis thaliana GN=VIN3 PE=1 SV=2
Unigene53514_All	88.58	97.2	147.86	184.787	0.140761	0.756832	1.07473	0.616072	0.93397	0.317898	K01602//ribulose-bisphosphate carboxylase small chain [EC:4.1.1.39]+ko01100//Metabolic pathways+ko00710//Carbon fixation in photosynthetic organisms+ko01200//Carbon metabolism+ko00630//Glyoxylate and dicarboxylate metabolism	AK428159.1 Brachypodium distachyon mRNA, clone: PL016C01-A-025_H22 >AK436854.1 Brachypodium distachyon mRNA, clone: PL016C01-A-082_C06	PREDICTED: ribulose bisphosphate carboxylase small chain, chloroplastic-like [Brachypodium distachyon] >KQJ81957.1 hypothetical protein BRADI_5g04080 [Brachypodium distachyon]		Ribulose bisphosphate carboxylase small chain A, chloroplastic OS=Oryza sativa subsp. japonica GN=RBCS-A PE=2 SV=2	GO:0015977//carbon fixation;GO:0009853//photorespiration;GO:0004497//monooxygenase activity;GO:0015979//photosynthesis;GO:0016984//ribulose-bisphosphate carboxylase activity;GO:0009507//chloroplast
Unigene53515_All	200.377	113.93	113.543	181.487	-0.810087	-0.797709	-0.131625	0.0123778	0.678462	0.666085	K01602//ribulose-bisphosphate carboxylase small chain [EC:4.1.1.39]+ko01100//Metabolic pathways+ko00710//Carbon fixation in photosynthetic organisms+ko01200//Carbon metabolism+ko00630//Glyoxylate and dicarboxylate metabolism	CT830714.1 Oryza sativa (indica cultivar-group) cDNA clone:OSIGCSN038G03, full insert sequence	ribulose-1,5-bisphosphate carboxylase/oxygenase small subunit [Oryza punctata]	Ribulose bisphosphate carboxylase, small chain	Ribulose bisphosphate carboxylase small chain A, chloroplastic OS=Oryza sativa subsp. japonica GN=RBCS-A PE=2 SV=2	GO:0015977//carbon fixation;GO:0019253//reductive pentose-phosphate cycle;GO:0009853//photorespiration;GO:0004497//monooxygenase activity;GO:0015979//photosynthesis;GO:0016984//ribulose-bisphosphate carboxylase activity;GO:0009507//chloroplast
CL2153.Contig1_All	2309.53	1729.17	4911.67	6702.5	-0.413334	1.09165	1.54377	1.50498	1.95711	0.452125	K01602//ribulose-bisphosphate carboxylase small chain [EC:4.1.1.39]+ko01100//Metabolic pathways+ko00710//Carbon fixation in photosynthetic organisms+ko01200//Carbon metabolism+ko00630//Glyoxylate and dicarboxylate metabolism	AK428159.1 Brachypodium distachyon mRNA, clone: PL016C01-A-025_H22 >AK436854.1 Brachypodium distachyon mRNA, clone: PL016C01-A-082_C06	PREDICTED: ribulose bisphosphate carboxylase small chain, chloroplastic-like [Brachypodium distachyon] >KQJ81957.1 hypothetical protein BRADI_5g04080 [Brachypodium distachyon]	Ribulose bisphosphate carboxylase, small chain	Ribulose bisphosphate carboxylase small chain, chloroplastic OS=Hordeum vulgare PE=2 SV=1	GO:0015977//carbon fixation;GO:0009853//photorespiration;GO:0004497//monooxygenase activity;GO:0015979//photosynthesis;GO:0016984//ribulose-bisphosphate carboxylase activity;GO:0009507//chloroplast
PGKase
CL3380.Contig1_All	40.37	26.9033	28.08	42.67	-0.583955	-0.514814	0.082027	0.069141	0.665982	0.596841	K00927//phosphoglycerate kinase [EC:2.7.2.3]+ko00010//Glycolysis / Gluconeogenesis+ko01230//Biosynthesis of amino acids+ko01100//Metabolic pathways+ko01110//Biosynthesis of secondary metabolites+ko00710//Carbon fixation in photosynthetic organisms+ko01200//Carbon metabolism	FP097231.1 Phyllostachys edulis cDNA clone: bphylf049e19, full insert sequence	hypothetical protein BRADI_2g21120 [Brachypodium distachyon]	Phosphoglycerate kinase	Phosphoglycerate kinase, chloroplastic OS=Triticum aestivum PE=2 SV=1	GO:0005524//ATP binding;GO:0006096//glycolytic process;GO:0004618//phosphoglycerate kinase activity
CL3380.Contig10_All	93.1233	75.7067	130.53	184.49	-0.294697	0.494418	0.992643	0.789115	1.28734	0.498225	K00927//phosphoglycerate kinase [EC:2.7.2.3]+ko00010//Glycolysis / Gluconeogenesis+ko01230//Biosynthesis of amino acids+ko01100//Metabolic pathways+ko01110//Biosynthesis of secondary metabolites+ko00710//Carbon fixation in photosynthetic organisms+ko01200//Carbon metabolism	FP097231.1 Phyllostachys edulis cDNA clone: bphylf049e19, full insert sequence	hypothetical protein BRADI_2g21120 [Brachypodium distachyon]	Phosphoglycerate kinase	Phosphoglycerate kinase, chloroplastic OS=Triticum aestivum PE=2 SV=1	GO:0005524//ATP binding;GO:0006096//glycolytic process;GO:0004618//phosphoglycerate kinase activity
CL3380.Contig6_All	191.12	141.49	232.5	339.027	-0.430755	0.288262	0.831438	0.719016	1.26219	0.543176	K00927//phosphoglycerate kinase [EC:2.7.2.3]+ko00010//Glycolysis / Gluconeogenesis+ko01230//Biosynthesis of amino acids+ko01100//Metabolic pathways+ko01110//Biosynthesis of secondary metabolites+ko00710//Carbon fixation in photosynthetic organisms+ko01200//Carbon metabolism	FP097231.1 Phyllostachys edulis cDNA clone: bphylf049e19, full insert sequence	PREDICTED: phosphoglycerate kinase, chloroplastic [Brachypodium distachyon] >KQK05600.1 hypothetical protein BRADI_2g21120 [Brachypodium distachyon] >KQK05602.1 hypothetical protein BRADI_2g21120 [Brachypodium distachyon]	Phosphoglycerate kinase	Phosphoglycerate kinase, chloroplastic OS=Triticum aestivum PE=2 SV=1	GO:0005524//ATP binding;GO:0006096//glycolytic process;GO:0004618//phosphoglycerate kinase activity
CL3380.Contig13_All	9.7	6.24667	6.05	7.78333	-0.632332	-0.670844	-0.312898	-0.0385116	0.319434	0.357946	K00927//phosphoglycerate kinase [EC:2.7.2.3]+ko00010//Glycolysis / Gluconeogenesis+ko01230//Biosynthesis of amino acids+ko01100//Metabolic pathways+ko01110//Biosynthesis of secondary metabolites+ko00710//Carbon fixation in photosynthetic organisms+ko01200//Carbon metabolism	XM_003568141.3 PREDICTED: Brachypodium distachyon phosphoglycerate kinase, chloroplastic (LOC100831948), mRNA	PREDICTED: phosphoglycerate kinase, chloroplastic [Brachypodium distachyon] >KQK05600.1 hypothetical protein BRADI_2g21120 [Brachypodium distachyon] >KQK05602.1 hypothetical protein BRADI_2g21120 [Brachypodium distachyon]	Phosphoglycerate kinase	Phosphoglycerate kinase, chloroplastic OS=Triticum aestivum PE=2 SV=1	GO:0005524//ATP binding;GO:0006096//glycolytic process;GO:0004618//phosphoglycerate kinase activity
CL3380.Contig11_All	309.987	212.173	317.653	384.073	-0.543879	0.0433446	0.315712	0.587223	0.859591	0.272368	K00927//phosphoglycerate kinase [EC:2.7.2.3]+ko00010//Glycolysis / Gluconeogenesis+ko01230//Biosynthesis of amino acids+ko01100//Metabolic pathways+ko01110//Biosynthesis of secondary metabolites+ko00710//Carbon fixation in photosynthetic organisms+ko01200//Carbon metabolism	XM_003568141.3 PREDICTED: Brachypodium distachyon phosphoglycerate kinase, chloroplastic (LOC100831948), mRNA	hypothetical protein BRADI_2g21120 [Brachypodium distachyon]	Phosphoglycerate kinase	Phosphoglycerate kinase, chloroplastic OS=Triticum aestivum PE=2 SV=1	GO:0005524//ATP binding;GO:0006096//glycolytic process;GO:0004618//phosphoglycerate kinase activity
CL9301.Contig1_All	76.1733	49.35	30.9367	49.95	-0.624358	-1.28704	-0.601771	-0.662685	0.0225873	0.685273	K00927//phosphoglycerate kinase [EC:2.7.2.3]+ko00010//Glycolysis / Gluconeogenesis+ko01230//Biosynthesis of amino acids+ko01100//Metabolic pathways+ko01110//Biosynthesis of secondary metabolites+ko00710//Carbon fixation in photosynthetic organisms+ko01200//Carbon metabolism	FP097096.1 Phyllostachys edulis cDNA clone: bphylf033h16, full insert sequence	Phosphoglycerate kinase, cytosolic [Dichanthelium oligosanthes]	Phosphoglycerate kinase	Phosphoglycerate kinase, cytosolic OS=Triticum aestivum PE=2 SV=1	GO:0005524//ATP binding;GO:0006096//glycolytic process;GO:0004618//phosphoglycerate kinase activity
GAPDHase
CL293.Contig30_All	22.02	34.77	60.47	90.62	0.662617	1.46567	2.047	0.803052	1.38438	0.581332	K05298//glyceraldehyde-3-phosphate dehydrogenase (NADP+) (phosphorylating) [EC:1.2.1.13]+ko01100//Metabolic pathways+ko00710//Carbon fixation in photosynthetic organisms+ko01200//Carbon metabolism	FP098374.1 Phyllostachys edulis cDNA clone: bphyem213j07, full insert sequence	Glyceraldehyde-3-phosphate dehydrogenase B, chloroplastic [Triticum urartu]	Glyceraldehyde 3-phosphate dehydrogenase, NAD binding domain	Glyceraldehyde-3-phosphate dehydrogenase GAPB, chloroplastic OS=Arabidopsis thaliana GN=GAPB PE=1 SV=2
CL293.Contig21_All	1.3	1.09	8.18	3.83333	-0.25124	2.66222	1.56249	2.91346	1.81373	-1.09973	K05298//glyceraldehyde-3-phosphate dehydrogenase (NADP+) (phosphorylating) [EC:1.2.1.13]+ko01100//Metabolic pathways+ko00710//Carbon fixation in photosynthetic organisms+ko01200//Carbon metabolism	FP098374.1 Phyllostachys edulis cDNA clone: bphyem213j07, full insert sequence	PREDICTED: glyceraldehyde-3-phosphate dehydrogenase B, chloroplastic [Brachypodium distachyon] >KQK23841.1 hypothetical protein BRADI_1g76470 [Brachypodium distachyon]	Glyceraldehyde 3-phosphate dehydrogenase, C-terminal domain	Glyceraldehyde-3-phosphate dehydrogenase GAPB, chloroplastic OS=Arabidopsis thaliana GN=GAPB PE=1 SV=2	GO:0006006//glucose metabolic process;GO:0016620//oxidoreductase activity, acting on the aldehyde or oxo group of donors, NAD or NADP as acceptor;GO:0050661//NADP binding;GO:0051287//NAD binding
Unigene64288_All	521.887	307.21	382.753	568.983	-0.76239	-0.437144	0.131395	0.325246	0.893785	0.568539	K05298//glyceraldehyde-3-phosphate dehydrogenase (NADP+) (phosphorylating) [EC:1.2.1.13]+ko01100//Metabolic pathways+ko00710//Carbon fixation in photosynthetic organisms+ko01200//Carbon metabolism	XM_020313376.1 PREDICTED: Aegilops tauschii subsp. tauschii glyceraldehyde-3-phosphate dehydrogenase A, chloroplastic (LOC109754470), mRNA	PREDICTED: glyceraldehyde-3-phosphate dehydrogenase A, chloroplastic isoform X2 [Brachypodium distachyon] >KQJ82963.1 hypothetical protein BRADI_5g12330 [Brachypodium distachyon]	Glyceraldehyde 3-phosphate dehydrogenase, C-terminal domain	Glyceraldehyde-3-phosphate dehydrogenase A, chloroplastic OS=Zea mays GN=GAPA PE=2 SV=1	GO:0006006//glucose metabolic process;GO:0016620//oxidoreductase activity, acting on the aldehyde or oxo group of donors, NAD or NADP as acceptor;GO:0050661//NADP binding;GO:0051287//NAD binding
CL293.Contig33_All	100.97	55.9233	109.13	129.763	-0.849608	0.121563	0.365458	0.971171	1.21507	0.243895	K05298//glyceraldehyde-3-phosphate dehydrogenase (NADP+) (phosphorylating) [EC:1.2.1.13]+ko01100//Metabolic pathways+ko00710//Carbon fixation in photosynthetic organisms+ko01200//Carbon metabolism	FP098374.1 Phyllostachys edulis cDNA clone: bphyem213j07, full insert sequence	PREDICTED: glyceraldehyde-3-phosphate dehydrogenase B, chloroplastic [Brachypodium distachyon] >KQK23841.1 hypothetical protein BRADI_1g76470 [Brachypodium distachyon]	Glyceraldehyde 3-phosphate dehydrogenase, C-terminal domain	Glyceraldehyde-3-phosphate dehydrogenase GAPB, chloroplastic OS=Arabidopsis thaliana GN=GAPB PE=1 SV=2	GO:0006006//glucose metabolic process;GO:0016620//oxidoreductase activity, acting on the aldehyde or oxo group of donors, NAD or NADP as acceptor;GO:0050661//NADP binding;GO:0051287//NAD binding
Unigene64290_All	365.55	216.813	170.847	316.103	-0.752736	-1.08808	-0.202073	-0.335348	0.550663	0.886011	K05298//glyceraldehyde-3-phosphate dehydrogenase (NADP+) (phosphorylating) [EC:1.2.1.13]+ko01100//Metabolic pathways+ko00710//Carbon fixation in photosynthetic organisms+ko01200//Carbon metabolism	XM_015780502.1 PREDICTED: Oryza sativa Japonica Group glyceraldehyde-3-phosphate dehydrogenase A, chloroplastic (LOC4336044), mRNA	PREDICTED: glyceraldehyde-3-phosphate dehydrogenase A, chloroplastic isoform X2 [Brachypodium distachyon] >KQJ82963.1 hypothetical protein BRADI_5g12330 [Brachypodium distachyon]	Glyceraldehyde 3-phosphate dehydrogenase, NAD binding domain	Glyceraldehyde-3-phosphate dehydrogenase A, chloroplastic OS=Zea mays GN=GAPA PE=2 SV=1	GO:0006006//glucose metabolic process;GO:0016620//oxidoreductase activity, acting on the aldehyde or oxo group of donors, NAD or NADP as acceptor;GO:0050661//NADP binding;GO:0051287//NAD binding
CL293.Contig25_All	50.7133	46.6267	28.6667	43.8167	-0.120048	-0.809089	-0.20593	-0.689041	-0.0858817	0.603159	K05298//glyceraldehyde-3-phosphate dehydrogenase (NADP+) (phosphorylating) [EC:1.2.1.13]+ko01100//Metabolic pathways+ko00710//Carbon fixation in photosynthetic organisms+ko01200//Carbon metabolism	FP098374.1 Phyllostachys edulis cDNA clone: bphyem213j07, full insert sequence	PREDICTED: glyceraldehyde-3-phosphate dehydrogenase B, chloroplastic [Brachypodium distachyon] >KQK23841.1 hypothetical protein BRADI_1g76470 [Brachypodium distachyon]	Glyceraldehyde 3-phosphate dehydrogenase, C-terminal domain	Glyceraldehyde-3-phosphate dehydrogenase GAPB, chloroplastic OS=Arabidopsis thaliana GN=GAPB PE=1 SV=2	GO:0006006//glucose metabolic process;GO:0016620//oxidoreductase activity, acting on the aldehyde or oxo group of donors, NAD or NADP as acceptor;GO:0050661//NADP binding;GO:0051287//NAD binding
CL293.Contig10_All	244.163	185.143	301.38	299.263	-0.395809	0.316084	0.299386	0.711893	0.695195	-0.0166975	K05298//glyceraldehyde-3-phosphate dehydrogenase (NADP+) (phosphorylating) [EC:1.2.1.13]+ko01100//Metabolic pathways+ko00710//Carbon fixation in photosynthetic organisms+ko01200//Carbon metabolism	FP098374.1 Phyllostachys edulis cDNA clone: bphyem213j07, full insert sequence	PREDICTED: glyceraldehyde-3-phosphate dehydrogenase B, chloroplastic [Brachypodium distachyon] >KQK23841.1 hypothetical protein BRADI_1g76470 [Brachypodium distachyon]	Glyceraldehyde 3-phosphate dehydrogenase, C-terminal domain	Glyceraldehyde-3-phosphate dehydrogenase GAPB, chloroplastic OS=Arabidopsis thaliana GN=GAPB PE=1 SV=2	GO:0006006//glucose metabolic process;GO:0016620//oxidoreductase activity, acting on the aldehyde or oxo group of donors, NAD or NADP as acceptor;GO:0050661//NADP binding;GO:0051287//NAD binding
CL293.Contig12_All	91.46	69.8333	151.08	182.893	-0.386594	0.730485	1.0048	1.11708	1.39139	0.274313	K05298//glyceraldehyde-3-phosphate dehydrogenase (NADP+) (phosphorylating) [EC:1.2.1.13]+ko01100//Metabolic pathways+ko00710//Carbon fixation in photosynthetic organisms+ko01200//Carbon metabolism	XM_020342416.1 PREDICTED: Aegilops tauschii subsp. tauschii glyceraldehyde-3-phosphate dehydrogenase B, chloroplastic (LOC109783816), mRNA	Glyceraldehyde-3-phosphate dehydrogenase B, chloroplastic [Triticum urartu]	Glyceraldehyde 3-phosphate dehydrogenase, NAD binding domain	Glyceraldehyde-3-phosphate dehydrogenase GAPB, chloroplastic OS=Arabidopsis thaliana GN=GAPB PE=1 SV=2
Unigene64285_All	202.913	141.73	228.677	356.983	-0.514018	0.178632	0.820033	0.69265	1.33405	0.641401	K05298//glyceraldehyde-3-phosphate dehydrogenase (NADP+) (phosphorylating) [EC:1.2.1.13]+ko01100//Metabolic pathways+ko00710//Carbon fixation in photosynthetic organisms+ko01200//Carbon metabolism	FP100252.1 Phyllostachys edulis cDNA clone: bphylf046f07, full insert sequence	PREDICTED: glyceraldehyde-3-phosphate dehydrogenase A, chloroplastic isoform X2 [Brachypodium distachyon] >KQJ82963.1 hypothetical protein BRADI_5g12330 [Brachypodium distachyon]	Glyceraldehyde 3-phosphate dehydrogenase, NAD binding domain	Glyceraldehyde-3-phosphate dehydrogenase A, chloroplastic OS=Zea mays GN=GAPA PE=2 SV=1	GO:0006006//glucose metabolic process;GO:0016620//oxidoreductase activity, acting on the aldehyde or oxo group of donors, NAD or NADP as acceptor;GO:0050661//NADP binding;GO:0051287//NAD binding
Unigene64280_All	476.82	313.04	369.087	592.293	-0.604243	-0.362178	0.318747	0.242065	0.922989	0.680925	K05298//glyceraldehyde-3-phosphate dehydrogenase (NADP+) (phosphorylating) [EC:1.2.1.13]+ko01100//Metabolic pathways+ko00710//Carbon fixation in photosynthetic organisms+ko01200//Carbon metabolism	XM_020313376.1 PREDICTED: Aegilops tauschii subsp. tauschii glyceraldehyde-3-phosphate dehydrogenase A, chloroplastic (LOC109754470), mRNA	PREDICTED: glyceraldehyde-3-phosphate dehydrogenase A, chloroplastic isoform X2 [Brachypodium distachyon] >KQJ82963.1 hypothetical protein BRADI_5g12330 [Brachypodium distachyon]	Glyceraldehyde 3-phosphate dehydrogenase, C-terminal domain	Glyceraldehyde-3-phosphate dehydrogenase A, chloroplastic OS=Zea mays GN=GAPA PE=2 SV=1	GO:0006006//glucose metabolic process;GO:0016620//oxidoreductase activity, acting on the aldehyde or oxo group of donors, NAD or NADP as acceptor;GO:0050661//NADP binding;GO:0051287//NAD binding
CL293.Contig13_All	145.397	72.7467	221.963	134.563	-0.995426	0.617013	-0.106946	1.61244	0.88848	-0.723958	K05298//glyceraldehyde-3-phosphate dehydrogenase (NADP+) (phosphorylating) [EC:1.2.1.13]+ko01100//Metabolic pathways+ko00710//Carbon fixation in photosynthetic organisms+ko01200//Carbon metabolism	FP098374.1 Phyllostachys edulis cDNA clone: bphyem213j07, full insert sequence	PREDICTED: glyceraldehyde-3-phosphate dehydrogenase A, chloroplastic [Oryza sativa Japonica Group] >CAD40906.1 OSJNBa0036B21.24 [Oryza sativa Japonica Group] >CAE01532.1 OSJNBa0072F16.1 [Oryza sativa Japonica Group] >BAF14898.1 Os04g0459500 [Oryza sativa Japonica Group] >CAH67076.1 OSIGBa0097P08.6 [Oryza sativa] >CAH67444.1 H0219H12.1 [Oryza sativa] >EAY94393.1 hypothetical protein OsI_16160 [Ory…	Glyceraldehyde 3-phosphate dehydrogenase, NAD binding domain	Glyceraldehyde-3-phosphate dehydrogenase A, chloroplastic OS=Zea mays GN=GAPA PE=2 SV=1	GO:0006006//glucose metabolic process;GO:0016620//oxidoreductase activity, acting on the aldehyde or oxo group of donors, NAD or NADP as acceptor;GO:0050661//NADP binding;GO:0051287//NAD binding
CL293.Contig26_All	1.74667	2.07333	4.77333	4.48667	0.255346	1.47632	1.37985	1.22097	1.12451	-0.096465	K05298//glyceraldehyde-3-phosphate dehydrogenase (NADP+) (phosphorylating) [EC:1.2.1.13]+ko01100//Metabolic pathways+ko00710//Carbon fixation in photosynthetic organisms+ko01200//Carbon metabolism	FP098374.1 Phyllostachys edulis cDNA clone: bphyem213j07, full insert sequence	hypothetical protein BRADI_1g76470 [Brachypodium distachyon]	Glyceraldehyde 3-phosphate dehydrogenase, C-terminal domain	Glyceraldehyde-3-phosphate dehydrogenase B, chloroplastic (Fragment) OS=Nicotiana tabacum GN=GAPB PE=2 SV=1	GO:0006006//glucose metabolic process;GO:0016620//oxidoreductase activity, acting on the aldehyde or oxo group of donors, NAD or NADP as acceptor;GO:0050661//NADP binding;GO:0051287//NAD binding
ALDase
Unigene48591_All	358.167	165.057	117.603	439.333	-1.11501	-1.59974	0.299847	-0.484731	1.41485	1.89958	K01623//fructose-bisphosphate aldolase, class I [EC:4.1.2.13]+ko00010//Glycolysis / Gluconeogenesis+ko00030//Pentose phosphate pathway+ko01230//Biosynthesis of amino acids+ko01100//Metabolic pathways+ko00051//Fructose and mannose metabolism+ko01110//Biosynthesis of secondary metabolites+ko00710//Carbon fixation in photosynthetic organisms+ko01200//Carbon metabolism	XM_020328039.1 PREDICTED: Aegilops tauschii subsp. tauschii fructose-bisphosphate aldolase, chloroplastic (LOC109769287), mRNA	Fructose-bisphosphate aldolase, chloroplastic [Dichanthelium oligosanthes]	Fructose-bisphosphate aldolase class-I	Fructose-bisphosphate aldolase, chloroplastic OS=Oryza sativa subsp. japonica GN=ALDP PE=1 SV=2	GO:0010287//plastoglobule;GO:0006094//gluconeogenesis;GO:0004332//fructose-bisphosphate aldolase activity;GO:0006096//glycolytic process;GO:0005737//cytoplasm
Unigene48588_All	560.377	139.93	121.14	1099.92	-1.99878	-2.2041	0.979794	-0.205321	2.97858	3.1839	K01623//fructose-bisphosphate aldolase, class I [EC:4.1.2.13]+ko00010//Glycolysis / Gluconeogenesis+ko00030//Pentose phosphate pathway+ko01230//Biosynthesis of amino acids+ko01100//Metabolic pathways+ko00051//Fructose and mannose metabolism+ko01110//Biosynthesis of secondary metabolites+ko00710//Carbon fixation in photosynthetic organisms+ko01200//Carbon metabolism	AF216582.2 Avena sativa fructose 1,6-bisphosphate aldolase precursor, mRNA, complete cds	chloroplast fructose-1,6-biphosphate aldolase [Triticum aestivum]	Fructose-bisphosphate aldolase class-I	Fructose-bisphosphate aldolase, chloroplastic OS=Oryza sativa subsp. japonica GN=ALDP PE=1 SV=2	GO:0010287//plastoglobule;GO:0006094//gluconeogenesis;GO:0004332//fructose-bisphosphate aldolase activity;GO:0006096//glycolytic process;GO:0005737//cytoplasm
CL15268.Contig2_All	4.75	9.39667	7.00667	4.98333	0.989455	0.583429	0.085422	-0.406026	-0.904033	-0.498007	K01623//fructose-bisphosphate aldolase, class I [EC:4.1.2.13]+ko00010//Glycolysis / Gluconeogenesis+ko00030//Pentose phosphate pathway+ko01230//Biosynthesis of amino acids+ko01100//Metabolic pathways+ko00051//Fructose and mannose metabolism+ko01110//Biosynthesis of secondary metabolites+ko00710//Carbon fixation in photosynthetic organisms+ko01200//Carbon metabolism;K04733//interleukin-1 receptor-…	FP097086.1 Phyllostachys edulis cDNA clone: bphyem002o15, full insert sequence	PREDICTED: UPF0329 protein ECU05_1680/ECU11_0050 isoform X1 [Brachypodium distachyon] >KQJ97371.1 hypothetical protein BRADI_3g30340 [Brachypodium distachyon]	Heavy-metal-associated domain	Heavy metal-associated isoprenylated plant protein 39 OS=Arabidopsis thaliana GN=HIPP39 PE=2 SV=1	GO:0046914//transition metal ion binding;GO:0030001//metal ion transport;GO:0005737//cytoplasm;GO:0046916//cellular transition metal ion homeostasis
CL15268.Contig1_All	0.673333	0.603333	0.656667	1.14333	-0.150512	-0.0163391	0.777293	0.134173	0.927805	0.793632	K01623//fructose-bisphosphate aldolase, class I [EC:4.1.2.13]+ko00010//Glycolysis / Gluconeogenesis+ko00030//Pentose phosphate pathway+ko01230//Biosynthesis of amino acids+ko01100//Metabolic pathways+ko00051//Fructose and mannose metabolism+ko01110//Biosynthesis of secondary metabolites+ko00710//Carbon fixation in photosynthetic organisms+ko01200//Carbon metabolism;K04733//interleukin-1 receptor-…	FP097086.1 Phyllostachys edulis cDNA clone: bphyem002o15, full insert sequence	PREDICTED: UPF0329 protein ECU05_1680/ECU11_0050 isoform X1 [Brachypodium distachyon] >KQJ97371.1 hypothetical protein BRADI_3g30340 [Brachypodium distachyon]	Heavy-metal-associated domain	Heavy metal-associated isoprenylated plant protein 39 OS=Arabidopsis thaliana GN=HIPP39 PE=2 SV=1	GO:0046872//metal ion binding;GO:0046914//transition metal ion binding;GO:0030001//metal ion transport;GO:0005737//cytoplasm;GO:0046916//cellular transition metal ion homeostasis
CL1648.Contig45_All	60.6267	43.0867	68.7533	39.4533	-0.490074	0.192131	-0.614458	0.682205	-0.124384	-0.806589	K01623//fructose-bisphosphate aldolase, class I [EC:4.1.2.13]+ko00010//Glycolysis / Gluconeogenesis+ko00030//Pentose phosphate pathway+ko01230//Biosynthesis of amino acids+ko01100//Metabolic pathways+ko00051//Fructose and mannose metabolism+ko01110//Biosynthesis of secondary metabolites+ko00710//Carbon fixation in photosynthetic organisms+ko01200//Carbon metabolism	XM_020343165.1 PREDICTED: Aegilops tauschii subsp. tauschii fructose-bisphosphate aldolase 5, cytosolic-like (LOC109784565), mRNA	predicted protein [Hordeum vulgare subsp. vulgare] >BAJ88466.1 predicted protein [Hordeum vulgare subsp. vulgare]	Fructose-bisphosphate aldolase class-I	Fructose-bisphosphate aldolase 5, cytosolic OS=Arabidopsis thaliana GN=FBA5 PE=1 SV=1	GO:0004332//fructose-bisphosphate aldolase activity;GO:0006096//glycolytic process
CL1648.Contig49_All	185.813	118.93	191.64	243.473	-0.640265	0.0499321	0.393539	0.690197	1.0338	0.343607	K01623//fructose-bisphosphate aldolase, class I [EC:4.1.2.13]+ko00010//Glycolysis / Gluconeogenesis+ko00030//Pentose phosphate pathway+ko01230//Biosynthesis of amino acids+ko01100//Metabolic pathways+ko00051//Fructose and mannose metabolism+ko01110//Biosynthesis of secondary metabolites+ko00710//Carbon fixation in photosynthetic organisms+ko01200//Carbon metabolism	XM_020343165.1 PREDICTED: Aegilops tauschii subsp. tauschii fructose-bisphosphate aldolase 5, cytosolic-like (LOC109784565), mRNA	predicted protein [Hordeum vulgare subsp. vulgare] >BAJ88466.1 predicted protein [Hordeum vulgare subsp. vulgare]	Fructose-bisphosphate aldolase class-I	Fructose-bisphosphate aldolase 5, cytosolic OS=Arabidopsis thaliana GN=FBA5 PE=1 SV=1	GO:0004332//fructose-bisphosphate aldolase activity;GO:0006096//glycolytic process
CL1717.Contig15_All	237.813	71.4833	72.8067	196.387	-1.73061	-1.69601	-0.269896	0.0345992	1.46072	1.42612	K01623//fructose-bisphosphate aldolase, class I [EC:4.1.2.13]+ko00010//Glycolysis / Gluconeogenesis+ko00030//Pentose phosphate pathway+ko01230//Biosynthesis of amino acids+ko01100//Metabolic pathways+ko00051//Fructose and mannose metabolism+ko01110//Biosynthesis of secondary metabolites+ko00710//Carbon fixation in photosynthetic organisms+ko01200//Carbon metabolism	XM_020329088.1 PREDICTED: Aegilops tauschii subsp. tauschii fructose-bisphosphate aldolase, chloroplastic-like (LOC109770387), mRNA	PREDICTED: fructose-bisphosphate aldolase, chloroplastic [Oryza brachyantha]	Fructose-bisphosphate aldolase class-I	Fructose-bisphosphate aldolase, chloroplastic OS=Oryza sativa subsp. japonica GN=ALDP PE=1 SV=2	GO:0010287//plastoglobule;GO:0006094//gluconeogenesis;GO:0004332//fructose-bisphosphate aldolase activity;GO:0006096//glycolytic process;GO:0005737//cytoplasm
CL1648.Contig17_All	25.4233	22.5367	39.57	34.3267	-0.171613	0.643397	0.435635	0.81501	0.607249	-0.207762	K01623//fructose-bisphosphate aldolase, class I [EC:4.1.2.13]+ko00010//Glycolysis / Gluconeogenesis+ko00030//Pentose phosphate pathway+ko01230//Biosynthesis of amino acids+ko01100//Metabolic pathways+ko00051//Fructose and mannose metabolism+ko01110//Biosynthesis of secondary metabolites+ko00710//Carbon fixation in photosynthetic organisms+ko01200//Carbon metabolism	XM_020343165.1 PREDICTED: Aegilops tauschii subsp. tauschii fructose-bisphosphate aldolase 5, cytosolic-like (LOC109784565), mRNA	predicted protein [Hordeum vulgare subsp. vulgare] >BAJ88466.1 predicted protein [Hordeum vulgare subsp. vulgare]	Fructose-bisphosphate aldolase class-I	Fructose-bisphosphate aldolase 5, cytosolic OS=Arabidopsis thaliana GN=FBA5 PE=1 SV=1	GO:0004332//fructose-bisphosphate aldolase activity;GO:0006096//glycolytic process
Unigene48589_All	1.68667	0.556667	0.633333	3.67667	-1.59068	-1.41193	1.12544	0.178745	2.71612	2.53738	K01623//fructose-bisphosphate aldolase, class I [EC:4.1.2.13]+ko00010//Glycolysis / Gluconeogenesis+ko00030//Pentose phosphate pathway+ko01230//Biosynthesis of amino acids+ko01100//Metabolic pathways+ko00051//Fructose and mannose metabolism+ko01110//Biosynthesis of secondary metabolites+ko00710//Carbon fixation in photosynthetic organisms+ko01200//Carbon metabolism	XM_020328039.1 PREDICTED: Aegilops tauschii subsp. tauschii fructose-bisphosphate aldolase, chloroplastic (LOC109769287), mRNA	Fructose-bisphosphate aldolase, chloroplastic [Dichanthelium oligosanthes]	Fructose-bisphosphate aldolase class-I	Fructose-bisphosphate aldolase, chloroplastic OS=Oryza sativa subsp. japonica GN=ALDP PE=1 SV=2	GO:0010287//plastoglobule;GO:0006094//gluconeogenesis;GO:0004332//fructose-bisphosphate aldolase activity;GO:0006096//glycolytic process;GO:0005737//cytoplasm
CL7818.Contig5_All	59.21	63.48	32.89	29.3333	0.102223	-0.840015	-1.00498	-0.942238	-1.10721	-0.164968	K01623//fructose-bisphosphate aldolase, class I [EC:4.1.2.13]+ko00010//Glycolysis / Gluconeogenesis+ko00030//Pentose phosphate pathway+ko01230//Biosynthesis of amino acids+ko01100//Metabolic pathways+ko00051//Fructose and mannose metabolism+ko01110//Biosynthesis of secondary metabolites+ko00710//Carbon fixation in photosynthetic organisms+ko01200//Carbon metabolism	XM_003564823.3 PREDICTED: Brachypodium distachyon fructose-bisphosphate aldolase cytoplasmic isozyme (LOC100825584), mRNA	PREDICTED: fructose-bisphosphate aldolase cytoplasmic isozyme [Brachypodium distachyon] >KQK11092.1 hypothetical protein BRADI_2g58050 [Brachypodium distachyon]	Fructose-bisphosphate aldolase class-I	Fructose-bisphosphate aldolase 1, cytoplasmic OS=Oryza sativa subsp. japonica GN=FBA1 PE=1 SV=2	GO:0006094//gluconeogenesis;GO:0004332//fructose-bisphosphate aldolase activity;GO:0005829//cytosol;GO:0006096//glycolytic process;GO:0048364//root development;GO:0005737//cytoplasm
CL1717.Contig9_All	4.31	2.34333	2.41333	11.6933	-0.87421	-0.826515	1.44527	0.0476948	2.31948	2.27178	K01623//fructose-bisphosphate aldolase, class I [EC:4.1.2.13]+ko00010//Glycolysis / Gluconeogenesis+ko00030//Pentose phosphate pathway+ko01230//Biosynthesis of amino acids+ko01100//Metabolic pathways+ko00051//Fructose and mannose metabolism+ko01110//Biosynthesis of secondary metabolites+ko00710//Carbon fixation in photosynthetic organisms+ko01200//Carbon metabolism	NM_001147640.1 Zea mays Fructose-bisphosphate aldolase (IDP1438), mRNA >BT040423.1 Zea mays full-length cDNA clone ZM_BFc0090G17 mRNA, complete cds	PREDICTED: fructose-bisphosphate aldolase, chloroplastic [Oryza brachyantha]	Fructose-bisphosphate aldolase class-I	Fructose-bisphosphate aldolase, chloroplastic OS=Oryza sativa subsp. japonica GN=ALDP PE=1 SV=2	GO:0010287//plastoglobule;GO:0006094//gluconeogenesis;GO:0004332//fructose-bisphosphate aldolase activity;GO:0006096//glycolytic process;GO:0005737//cytoplasm
Unigene48616_All	1.02	0.616667	0.483333	2.69667	-0.727561	-1.0694	1.40352	-0.341836	2.13108	2.47292	K01623//fructose-bisphosphate aldolase, class I [EC:4.1.2.13]+ko00010//Glycolysis / Gluconeogenesis+ko00030//Pentose phosphate pathway+ko01230//Biosynthesis of amino acids+ko01100//Metabolic pathways+ko00051//Fructose and mannose metabolism+ko01110//Biosynthesis of secondary metabolites+ko00710//Carbon fixation in photosynthetic organisms+ko01200//Carbon metabolism	KR139997.1 Triticum aestivum chloroplast fructose-1,6-biphosphate aldolase (FBA) gene, complete cds; nuclear gene for chloroplast product	chloroplast fructose-1,6-biphosphate aldolase [Triticum aestivum]	Fructose-bisphosphate aldolase class-I	Fructose-bisphosphate aldolase, chloroplastic OS=Oryza sativa subsp. japonica GN=ALDP PE=1 SV=2
CL1717.Contig8_All	13.17	3.94	2.73333	20.7567	-1.73852	-2.25236	0.661405	-0.513842	2.39992	2.91376	K01623//fructose-bisphosphate aldolase, class I [EC:4.1.2.13]+ko00010//Glycolysis / Gluconeogenesis+ko00030//Pentose phosphate pathway+ko01230//Biosynthesis of amino acids+ko01100//Metabolic pathways+ko00051//Fructose and mannose metabolism+ko01110//Biosynthesis of secondary metabolites+ko00710//Carbon fixation in photosynthetic organisms+ko01200//Carbon metabolism	XM_020328039.1 PREDICTED: Aegilops tauschii subsp. tauschii fructose-bisphosphate aldolase, chloroplastic (LOC109769287), mRNA	fructose-bisphosphate aldolase, chloroplastic [Aegilops tauschii subsp. tauschii] >EMT21318.1 Fructose-bisphosphate aldolase, chloroplastic [Aegilops tauschii]	Fructose-bisphosphate aldolase class-I	Fructose-bisphosphate aldolase, chloroplastic OS=Oryza sativa subsp. japonica GN=ALDP PE=1 SV=2	GO:0004332//fructose-bisphosphate aldolase activity;GO:0006096//glycolytic process
Unigene48624_All	10.4633	2.9	3.44667	22.0533	-1.84674	-1.59574	1.08298	0.251	2.92972	2.67872	K01623//fructose-bisphosphate aldolase, class I [EC:4.1.2.13]+ko00010//Glycolysis / Gluconeogenesis+ko00030//Pentose phosphate pathway+ko01230//Biosynthesis of amino acids+ko01100//Metabolic pathways+ko00051//Fructose and mannose metabolism+ko01110//Biosynthesis of secondary metabolites+ko00710//Carbon fixation in photosynthetic organisms+ko01200//Carbon metabolism	XM_020328039.1 PREDICTED: Aegilops tauschii subsp. tauschii fructose-bisphosphate aldolase, chloroplastic (LOC109769287), mRNA	chloroplast fructose-1,6-biphosphate aldolase [Triticum aestivum]	Fructose-bisphosphate aldolase class-I	Fructose-bisphosphate aldolase, chloroplastic OS=Oryza sativa subsp. japonica GN=ALDP PE=1 SV=2
CL1717.Contig14_All	154.747	53.4367	70.8267	97.3267	-1.5317	-1.11136	-0.663122	0.420341	0.86858	0.448239	K01623//fructose-bisphosphate aldolase, class I [EC:4.1.2.13]+ko00010//Glycolysis / Gluconeogenesis+ko00030//Pentose phosphate pathway+ko01230//Biosynthesis of amino acids+ko01100//Metabolic pathways+ko00051//Fructose and mannose metabolism+ko01110//Biosynthesis of secondary metabolites+ko00710//Carbon fixation in photosynthetic organisms+ko01200//Carbon metabolism	AK359580.1 Hordeum vulgare subsp. vulgare mRNA for predicted protein, complete cds, clone: NIASHv1099G05	fructose-bisphosphate aldolase, chloroplastic-like [Aegilops tauschii subsp. tauschii]	Fructose-bisphosphate aldolase class-I	Fructose-bisphosphate aldolase, chloroplastic OS=Oryza sativa subsp. japonica GN=ALDP PE=1 SV=2	GO:0010287//plastoglobule;GO:0006094//gluconeogenesis;GO:0004332//fructose-bisphosphate aldolase activity;GO:0006096//glycolytic process;GO:0005737//cytoplasm
Unigene48595_All	1500.74	347.733	283.653	1181.09	-2.1068	-2.38889	-0.338493	-0.282087	1.76831	2.05039	K01623//fructose-bisphosphate aldolase, class I [EC:4.1.2.13]+ko00010//Glycolysis / Gluconeogenesis+ko00030//Pentose phosphate pathway+ko01230//Biosynthesis of amino acids+ko01100//Metabolic pathways+ko00051//Fructose and mannose metabolism+ko01110//Biosynthesis of secondary metabolites+ko00710//Carbon fixation in photosynthetic organisms+ko01200//Carbon metabolism	XM_020328039.1 PREDICTED: Aegilops tauschii subsp. tauschii fructose-bisphosphate aldolase, chloroplastic (LOC109769287), mRNA	fructose-bisphosphate aldolase, chloroplastic [Aegilops tauschii subsp. tauschii] >EMT21318.1 Fructose-bisphosphate aldolase, chloroplastic [Aegilops tauschii]	Fructose-bisphosphate aldolase class-I	Fructose-bisphosphate aldolase, chloroplastic OS=Oryza sativa subsp. japonica GN=ALDP PE=1 SV=2	GO:0004332//fructose-bisphosphate aldolase activity;GO:0006096//glycolytic process
FBPase
CL9825.Contig37_All	1.95333	1.79333	3.25667	9.98333	-0.120284	0.744587	2.35924	0.864871	2.47952	1.61465	K03841//fructose-1,6-bisphosphatase I [EC:3.1.3.11]+ko00010//Glycolysis / Gluconeogenesis+ko00030//Pentose phosphate pathway+ko01100//Metabolic pathways+ko00051//Fructose and mannose metabolism+ko01110//Biosynthesis of secondary metabolites+ko00710//Carbon fixation in photosynthetic organisms+ko01200//Carbon metabolism	FP092308.1 Phyllostachys edulis cDNA clone: bphyem201d09, full insert sequence	PREDICTED: fructose-1,6-bisphosphatase, cytosolic [Brachypodium distachyon] >KQK10761.1 hypothetical protein BRADI_2g56030 [Brachypodium distachyon]	Fructose-1-6-bisphosphatase, N-terminal domain	Fructose-1,6-bisphosphatase, cytosolic OS=Oryza coarctata PE=2 SV=1	GO:0005986//sucrose biosynthetic process;GO:0006002//fructose 6-phosphate metabolic process;GO:0006094//gluconeogenesis;GO:0006000//fructose metabolic process;GO:0005829//cytosol;GO:0042132//fructose 1,6-bisphosphate 1-phosphatase activity;GO:0030388//fructose 1,6-bisphosphate metabolic process
CL9825.Contig40_All	0.84	0.683333	1.30667	2.21	-0.298276	0.643405	1.3989	0.94168	1.69718	0.755499	K03841//fructose-1,6-bisphosphatase I [EC:3.1.3.11]+ko00010//Glycolysis / Gluconeogenesis+ko00030//Pentose phosphate pathway+ko01100//Metabolic pathways+ko00051//Fructose and mannose metabolism+ko01110//Biosynthesis of secondary metabolites+ko00710//Carbon fixation in photosynthetic organisms+ko01200//Carbon metabolism	XM_020300570.1 PREDICTED: Aegilops tauschii subsp. tauschii fructose-1,6-bisphosphatase, cytosolic (LOC109741479), transcript variant X1, mRNA	fructose-1,6-bisphosphatase, cytosolic isoform X1 [Aegilops tauschii subsp. tauschii]	Fructose-1-6-bisphosphatase, N-terminal domain	Fructose-1,6-bisphosphatase, cytosolic OS=Oryza coarctata PE=2 SV=1	GO:0005986//sucrose biosynthetic process;GO:0006002//fructose 6-phosphate metabolic process;GO:0006094//gluconeogenesis;GO:0006000//fructose metabolic process;GO:0005829//cytosol;GO:0042132//fructose 1,6-bisphosphate 1-phosphatase activity;GO:0030388//fructose 1,6-bisphosphate metabolic process
CL9825.Contig2_All	77.3733	54.0133	148.827	299.25	-0.51375	0.95133	1.95709	1.46508	2.47084	1.00576	K03841//fructose-1,6-bisphosphatase I [EC:3.1.3.11]+ko00010//Glycolysis / Gluconeogenesis+ko00030//Pentose phosphate pathway+ko01100//Metabolic pathways+ko00051//Fructose and mannose metabolism+ko01110//Biosynthesis of secondary metabolites+ko00710//Carbon fixation in photosynthetic organisms+ko01200//Carbon metabolism	XM_020300570.1 PREDICTED: Aegilops tauschii subsp. tauschii fructose-1,6-bisphosphatase, cytosolic (LOC109741479), transcript variant X1, mRNA	fructose-1,6-bisphosphatase, cytosolic isoform X1 [Aegilops tauschii subsp. tauschii]	Fructose-1-6-bisphosphatase, N-terminal domain	Fructose-1,6-bisphosphatase, cytosolic OS=Oryza coarctata PE=2 SV=1	GO:0005986//sucrose biosynthetic process;GO:0006002//fructose 6-phosphate metabolic process;GO:0006094//gluconeogenesis;GO:0006000//fructose metabolic process;GO:0005829//cytosol;GO:0042132//fructose 1,6-bisphosphate 1-phosphatase activity;GO:0030388//fructose 1,6-bisphosphate metabolic process
CL9825.Contig80_All	0.613333	0.606667	1.70333	2.1	-0.00293936	1.48096	1.7834	1.4839	1.78634	0.302439	K03841//fructose-1,6-bisphosphatase I [EC:3.1.3.11]+ko00010//Glycolysis / Gluconeogenesis+ko00030//Pentose phosphate pathway+ko01100//Metabolic pathways+ko00051//Fructose and mannose metabolism+ko01110//Biosynthesis of secondary metabolites+ko00710//Carbon fixation in photosynthetic organisms+ko01200//Carbon metabolism	FP092308.1 Phyllostachys edulis cDNA clone: bphyem201d09, full insert sequence	PREDICTED: fructose-1,6-bisphosphatase, cytosolic [Brachypodium distachyon] >KQK10761.1 hypothetical protein BRADI_2g56030 [Brachypodium distachyon]	Fructose-1-6-bisphosphatase, N-terminal domain	Fructose-1,6-bisphosphatase, cytosolic OS=Oryza coarctata PE=2 SV=1	GO:0005986//sucrose biosynthetic process;GO:0006002//fructose 6-phosphate metabolic process;GO:0006094//gluconeogenesis;GO:0006000//fructose metabolic process;GO:0005829//cytosol;GO:0042132//fructose 1,6-bisphosphate 1-phosphatase activity;GO:0030388//fructose 1,6-bisphosphate metabolic process
CL3745.Contig1_All	5.69333	7.23667	11.8867	11.11	0.350138	1.06911	0.971776	0.718972	0.621638	-0.0973345	K03841//fructose-1,6-bisphosphatase I [EC:3.1.3.11]+ko00010//Glycolysis / Gluconeogenesis+ko00030//Pentose phosphate pathway+ko01100//Metabolic pathways+ko00051//Fructose and mannose metabolism+ko01110//Biosynthesis of secondary metabolites+ko00710//Carbon fixation in photosynthetic organisms+ko01200//Carbon metabolism	AK065201.1 Oryza sativa Japonica Group cDNA clone:J013002E24, full insert sequence	PREDICTED: fructose-1,6-bisphosphatase, chloroplastic [Brachypodium distachyon] >KQK22408.1 hypothetical protein BRADI_1g67020 [Brachypodium distachyon]	Fructose-1-6-bisphosphatase, N-terminal domain	Fructose-1,6-bisphosphatase, chloroplastic OS=Oryza sativa subsp. indica GN=OsI_10887 PE=1 SV=1	GO:0005986//sucrose biosynthetic process;GO:0009773//photosynthetic electron transport in photosystem I;GO:0048046//apoplast;GO:0009409//response to cold;GO:0006094//gluconeogenesis;GO:0006000//fructose metabolic process;GO:0006002//fructose 6-phosphate metabolic process;GO:0005829//cytosol;GO:0009735//response to cytokinin;GO:0010319//stromule;GO:0042132//fructose 1,6-bisphosphate 1-phosphatase …
CL1369.Contig2_All	4.99333	10.1067	12.5133	3.68	1.02059	1.33611	-0.431766	0.315523	-1.45235	-1.76787	K03841//fructose-1,6-bisphosphatase I [EC:3.1.3.11]+ko00010//Glycolysis / Gluconeogenesis+ko00030//Pentose phosphate pathway+ko01100//Metabolic pathways+ko00051//Fructose and mannose metabolism+ko01110//Biosynthesis of secondary metabolites+ko00710//Carbon fixation in photosynthetic organisms+ko01200//Carbon metabolism	FP092749.1 Phyllostachys edulis cDNA clone: bphyem105h06, full insert sequence	PREDICTED: fructose-1,6-bisphosphatase class 1 [Brachypodium distachyon] >KQK16990.1 hypothetical protein BRADI_1g31810 [Brachypodium distachyon]	Fructose-1-6-bisphosphatase, N-terminal domain	Fructose-1,6-bisphosphatase, chloroplastic OS=Spinacia oleracea PE=1 SV=2	GO:0005986//sucrose biosynthetic process;GO:0006002//fructose 6-phosphate metabolic process;GO:0006094//gluconeogenesis;GO:0006000//fructose metabolic process;GO:0005829//cytosol;GO:0042132//fructose 1,6-bisphosphate 1-phosphatase activity;GO:0030388//fructose 1,6-bisphosphate metabolic process;GO:0009570//chloroplast stroma
Unigene30518_All	1.20333	0.806667	0.806667	0.5	-0.573756	-0.564941	-1.25461	0.00881458	-0.680855	-0.689669	K03841//fructose-1,6-bisphosphatase I [EC:3.1.3.11]+ko00010//Glycolysis / Gluconeogenesis+ko00030//Pentose phosphate pathway+ko01100//Metabolic pathways+ko00051//Fructose and mannose metabolism+ko01110//Biosynthesis of secondary metabolites+ko00710//Carbon fixation in photosynthetic organisms+ko01200//Carbon metabolism	FP101047.1 Phyllostachys edulis cDNA clone: bphyem201p23, full insert sequence	PREDICTED: fructose-1,6-bisphosphatase, cytosolic-like [Brachypodium distachyon] >KQK06044.1 hypothetical protein BRADI_2g24090 [Brachypodium distachyon]	Fructose-1-6-bisphosphatase, N-terminal domain	Fructose-1,6-bisphosphatase, cytosolic OS=Oryza coarctata PE=2 SV=1	GO:0005975//carbohydrate metabolic process;GO:0042132//fructose 1,6-bisphosphate 1-phosphatase activity
CL1369.Contig5_All	0.673333	1.55333	2.22	0.66	1.21159	1.72799	-0.0161073	0.516392	-1.2277	-1.74409	K03841//fructose-1,6-bisphosphatase I [EC:3.1.3.11]+ko00010//Glycolysis / Gluconeogenesis+ko00030//Pentose phosphate pathway+ko01100//Metabolic pathways+ko00051//Fructose and mannose metabolism+ko01110//Biosynthesis of secondary metabolites+ko00710//Carbon fixation in photosynthetic organisms+ko01200//Carbon metabolism	AK361825.1 Hordeum vulgare subsp. vulgare mRNA for predicted protein, complete cds, clone: NIASHv1150E15	predicted protein [Hordeum vulgare subsp. vulgare]	CbeA_antitoxin, type IV, cytoskeleton bundling-enhancing factor A	Fructose-1,6-bisphosphatase, chloroplastic OS=Brassica napus GN=FBP PE=2 SV=1	GO:0005986//sucrose biosynthetic process;GO:0006002//fructose 6-phosphate metabolic process;GO:0006094//gluconeogenesis;GO:0006000//fructose metabolic process;GO:0005829//cytosol;GO:0042132//fructose 1,6-bisphosphate 1-phosphatase activity;GO:0030388//fructose 1,6-bisphosphate metabolic process;GO:0009570//chloroplast stroma
CL3745.Contig6_All	58.1267	71.0533	101.793	67.3933	0.292577	0.819049	0.219126	0.526472	-0.0734512	-0.599923	K03841//fructose-1,6-bisphosphatase I [EC:3.1.3.11]+ko00010//Glycolysis / Gluconeogenesis+ko00030//Pentose phosphate pathway+ko01100//Metabolic pathways+ko00051//Fructose and mannose metabolism+ko01110//Biosynthesis of secondary metabolites+ko00710//Carbon fixation in photosynthetic organisms+ko01200//Carbon metabolism	XM_003558220.3 PREDICTED: Brachypodium distachyon fructose-1,6-bisphosphatase, chloroplastic (LOC100840857), mRNA	PREDICTED: fructose-1,6-bisphosphatase, chloroplastic [Brachypodium distachyon] >KQK22408.1 hypothetical protein BRADI_1g67020 [Brachypodium distachyon]	Fructose-1-6-bisphosphatase, N-terminal domain	Fructose-1,6-bisphosphatase, chloroplastic OS=Triticum aestivum GN=FBP PE=2 SV=1	GO:0005986//sucrose biosynthetic process;GO:0009773//photosynthetic electron transport in photosystem I;GO:0048046//apoplast;GO:0009409//response to cold;GO:0006094//gluconeogenesis;GO:0006000//fructose metabolic process;GO:0046872//metal ion binding;GO:0006002//fructose 6-phosphate metabolic process;GO:0005829//cytosol;GO:0009735//response to cytokinin;GO:0019253//reductive pentose-phosphate cyc…
CL1369.Contig1_All	3.26	3.93	3.01	1.71	0.273198	-0.101124	-0.922113	-0.374323	-1.19531	-0.820988	K03841//fructose-1,6-bisphosphatase I [EC:3.1.3.11]+ko00010//Glycolysis / Gluconeogenesis+ko00030//Pentose phosphate pathway+ko01100//Metabolic pathways+ko00051//Fructose and mannose metabolism+ko01110//Biosynthesis of secondary metabolites+ko00710//Carbon fixation in photosynthetic organisms+ko01200//Carbon metabolism	XM_003560361.3 PREDICTED: Brachypodium distachyon fructose-1,6-bisphosphatase class 1 (LOC100833448), mRNA	PREDICTED: fructose-1,6-bisphosphatase class 1 [Brachypodium distachyon] >KQK16990.1 hypothetical protein BRADI_1g31810 [Brachypodium distachyon]	Fructose-1-6-bisphosphatase, N-terminal domain	Fructose-1,6-bisphosphatase, chloroplastic OS=Spinacia oleracea PE=1 SV=2	GO:0005986//sucrose biosynthetic process;GO:0006002//fructose 6-phosphate metabolic process;GO:0006094//gluconeogenesis;GO:0006000//fructose metabolic process;GO:0005829//cytosol;GO:0042132//fructose 1,6-bisphosphate 1-phosphatase activity;GO:0030388//fructose 1,6-bisphosphate metabolic process;GO:0009570//chloroplast stroma
CL9825.Contig23_All	65.5533	26.24	41.2633	67.4433	-1.31631	-0.653282	0.0517104	0.66303	1.36802	0.704993	K03841//fructose-1,6-bisphosphatase I [EC:3.1.3.11]+ko00010//Glycolysis / Gluconeogenesis+ko00030//Pentose phosphate pathway+ko01100//Metabolic pathways+ko00051//Fructose and mannose metabolism+ko01110//Biosynthesis of secondary metabolites+ko00710//Carbon fixation in photosynthetic organisms+ko01200//Carbon metabolism	FP092308.1 Phyllostachys edulis cDNA clone: bphyem201d09, full insert sequence	PREDICTED: fructose-1,6-bisphosphatase, cytosolic [Brachypodium distachyon] >KQK10761.1 hypothetical protein BRADI_2g56030 [Brachypodium distachyon]	Fructose-1-6-bisphosphatase, N-terminal domain	Fructose-1,6-bisphosphatase, cytosolic OS=Oryza coarctata PE=2 SV=1	GO:0005986//sucrose biosynthetic process;GO:0006002//fructose 6-phosphate metabolic process;GO:0006094//gluconeogenesis;GO:0006000//fructose metabolic process;GO:0005829//cytosol;GO:0042132//fructose 1,6-bisphosphate 1-phosphatase activity;GO:0030388//fructose 1,6-bisphosphate metabolic process
CL3745.Contig8_All	63.8	52.7733	75.51	86.6467	-0.270265	0.253878	0.448698	0.524143	0.718962	0.19482	K03841//fructose-1,6-bisphosphatase I [EC:3.1.3.11]+ko00010//Glycolysis / Gluconeogenesis+ko00030//Pentose phosphate pathway+ko01100//Metabolic pathways+ko00051//Fructose and mannose metabolism+ko01110//Biosynthesis of secondary metabolites+ko00710//Carbon fixation in photosynthetic organisms+ko01200//Carbon metabolism	XM_003558220.3 PREDICTED: Brachypodium distachyon fructose-1,6-bisphosphatase, chloroplastic (LOC100840857), mRNA	PREDICTED: fructose-1,6-bisphosphatase, chloroplastic [Brachypodium distachyon] >KQK22408.1 hypothetical protein BRADI_1g67020 [Brachypodium distachyon]	Fructose-1-6-bisphosphatase, N-terminal domain	Fructose-1,6-bisphosphatase, chloroplastic OS=Triticum aestivum GN=FBP PE=2 SV=1	GO:0005986//sucrose biosynthetic process;GO:0009773//photosynthetic electron transport in photosystem I;GO:0048046//apoplast;GO:0009409//response to cold;GO:0006094//gluconeogenesis;GO:0006000//fructose metabolic process;GO:0005985//sucrose metabolic process;GO:0046872//metal ion binding;GO:0006002//fructose 6-phosphate metabolic process;GO:0005829//cytosol;GO:0009735//response to cytokinin;GO:00…
CL1042.Contig10_All	1.61333	0.823333	0.793333	0.876667	-0.969375	-1.01738	-0.877782	-0.0480096	0.0915927	0.139602	K03841//fructose-1,6-bisphosphatase I [EC:3.1.3.11]+ko00010//Glycolysis / Gluconeogenesis+ko00030//Pentose phosphate pathway+ko01100//Metabolic pathways+ko00051//Fructose and mannose metabolism+ko01110//Biosynthesis of secondary metabolites+ko00710//Carbon fixation in photosynthetic organisms+ko01200//Carbon metabolism;K14963//COMPASS component SWD3;K12662//U4/U6 small nuclear ribonucleoprotein P…	XM_020329743.1 PREDICTED: Aegilops tauschii subsp. tauschii uncharacterized WD repeat-containing protein C2A9.03-like (LOC109771025), mRNA	predicted protein [Hordeum vulgare subsp. vulgare]	WD domain, G-beta repeat
CL9825.Contig49_All	1.66	1.38667	2.67667	4.52333	-0.258214	0.701871	1.45236	0.960084	1.71057	0.750485	K03841//fructose-1,6-bisphosphatase I [EC:3.1.3.11]+ko00010//Glycolysis / Gluconeogenesis+ko00030//Pentose phosphate pathway+ko01100//Metabolic pathways+ko00051//Fructose and mannose metabolism+ko01110//Biosynthesis of secondary metabolites+ko00710//Carbon fixation in photosynthetic organisms+ko01200//Carbon metabolism	XM_020300570.1 PREDICTED: Aegilops tauschii subsp. tauschii fructose-1,6-bisphosphatase, cytosolic (LOC109741479), transcript variant X1, mRNA	fructose-1,6-bisphosphatase, cytosolic isoform X1 [Aegilops tauschii subsp. tauschii]	Fructose-1-6-bisphosphatase, N-terminal domain	Fructose-1,6-bisphosphatase, cytosolic OS=Oryza coarctata PE=2 SV=1	GO:0005986//sucrose biosynthetic process;GO:0006002//fructose 6-phosphate metabolic process;GO:0006094//gluconeogenesis;GO:0006000//fructose metabolic process;GO:0005829//cytosol;GO:0042132//fructose 1,6-bisphosphate 1-phosphatase activity;GO:0030388//fructose 1,6-bisphosphate metabolic process
CL1369.Contig3_All	16.9733	19.3	31.8367	23.31	0.189781	0.916353	0.464835	0.726572	0.275054	-0.451518	K03841//fructose-1,6-bisphosphatase I [EC:3.1.3.11]+ko00010//Glycolysis / Gluconeogenesis+ko00030//Pentose phosphate pathway+ko01100//Metabolic pathways+ko00051//Fructose and mannose metabolism+ko01110//Biosynthesis of secondary metabolites+ko00710//Carbon fixation in photosynthetic organisms+ko01200//Carbon metabolism	FP092749.1 Phyllostachys edulis cDNA clone: bphyem105h06, full insert sequence	fructose-1,6-bisphosphatase, chloroplastic [Sorghum bicolor] >EER90172.1 hypothetical protein SORBI_3010G219700 [Sorghum bicolor] >OQU76835.1 hypothetical protein SORBI_3010G219700 [Sorghum bicolor]	Fructose-1-6-bisphosphatase, N-terminal domain	Fructose-1,6-bisphosphatase, chloroplastic OS=Spinacia oleracea PE=1 SV=2	GO:0005986//sucrose biosynthetic process;GO:0006002//fructose 6-phosphate metabolic process;GO:0006094//gluconeogenesis;GO:0006000//fructose metabolic process;GO:0005829//cytosol;GO:0042132//fructose 1,6-bisphosphate 1-phosphatase activity;GO:0030388//fructose 1,6-bisphosphate metabolic process;GO:0009570//chloroplast stroma
CL9825.Contig76_All	0.116667	0.1	0.08	0.263333	-0.239314	-0.513805	1.21375	-0.274491	1.45307	1.72756	K03841//fructose-1,6-bisphosphatase I [EC:3.1.3.11]+ko00010//Glycolysis / Gluconeogenesis+ko00030//Pentose phosphate pathway+ko01100//Metabolic pathways+ko00051//Fructose and mannose metabolism+ko01110//Biosynthesis of secondary metabolites+ko00710//Carbon fixation in photosynthetic organisms+ko01200//Carbon metabolism	FP092308.1 Phyllostachys edulis cDNA clone: bphyem201d09, full insert sequence	fructose-1,6-bisphosphatase, cytosolic isoform X1 [Aegilops tauschii subsp. tauschii]	Inorganic pyrophosphatase	Fructose-1,6-bisphosphatase, cytosolic OS=Oryza coarctata PE=2 SV=1	GO:0005986//sucrose biosynthetic process;GO:0006002//fructose 6-phosphate metabolic process;GO:0006094//gluconeogenesis;GO:0006000//fructose metabolic process;GO:0005829//cytosol;GO:0042132//fructose 1,6-bisphosphate 1-phosphatase activity;GO:0030388//fructose 1,6-bisphosphate metabolic process
CL1042.Contig16_All	19.6133	10.1533	13.6233	12.1933	-0.947559	-0.519204	-0.682447	0.428355	0.265112	-0.163244	K03841//fructose-1,6-bisphosphatase I [EC:3.1.3.11]+ko00010//Glycolysis / Gluconeogenesis+ko00030//Pentose phosphate pathway+ko01100//Metabolic pathways+ko00051//Fructose and mannose metabolism+ko01110//Biosynthesis of secondary metabolites+ko00710//Carbon fixation in photosynthetic organisms+ko01200//Carbon metabolism;K14963//COMPASS component SWD3;K03130//transcription initiation factor TFIID s…	FP100585.1 Phyllostachys edulis cDNA clone: bphylf041k09, full insert sequence	PREDICTED: uncharacterized WD repeat-containing protein C2A9.03-like isoform X1 [Brachypodium distachyon] >XP_014752933.1 PREDICTED: uncharacterized WD repeat-containing protein C2A9.03-like isoform X1 [Brachypodium distachyon] >KQK19405.1 hypothetical protein BRADI_1g48090 [Brachypodium distachyon]	WD domain, G-beta repeat	Proline-rich receptor-like protein kinase PERK9 OS=Arabidopsis thaliana GN=PERK9 PE=1 SV=1
TKase
CL14956.Contig6_All	0.396667	0.483333	0.523333	0.373333	0.279702	0.410688	-0.0755197	0.130986	-0.355222	-0.486208	K00615//transketolase [EC:2.2.1.1]+ko00030//Pentose phosphate pathway+ko01230//Biosynthesis of amino acids+ko01100//Metabolic pathways+ko01110//Biosynthesis of secondary metabolites+ko00710//Carbon fixation in photosynthetic organisms+ko01200//Carbon metabolism	XM_015787721.1 PREDICTED: Oryza sativa Japonica Group transketolase, chloroplastic (LOC4340025), mRNA	transketolase, chloroplastic [Sorghum bicolor] >KXG19207.1 hypothetical protein SORBI_3010G023700 [Sorghum bicolor] >OQU75756.1 hypothetical protein SORBI_3010G023700 [Sorghum bicolor]	Transketolase, thiamine diphosphate binding domain	Transketolase, chloroplastic OS=Zea mays PE=1 SV=1	GO:0008152//metabolic process;GO:0004802//transketolase activity
CL14956.Contig3_All	0.74	0.596667	0.75	1.08	-0.305636	0.0302351	0.558647	0.335871	0.864282	0.528412	K00615//transketolase [EC:2.2.1.1]+ko00030//Pentose phosphate pathway+ko01230//Biosynthesis of amino acids+ko01100//Metabolic pathways+ko01110//Biosynthesis of secondary metabolites+ko00710//Carbon fixation in photosynthetic organisms+ko01200//Carbon metabolism	XM_003557192.3 PREDICTED: Brachypodium distachyon transketolase, chloroplastic (LOC100837200), mRNA	PREDICTED: transketolase, chloroplastic [Brachypodium distachyon] >KQK19985.1 hypothetical protein BRADI_1g51670 [Brachypodium distachyon]	Transketolase, thiamine diphosphate binding domain	Transketolase, chloroplastic OS=Zea mays PE=1 SV=1	GO:0008152//metabolic process;GO:0004802//transketolase activity
CL14956.Contig14_All	71.7367	81.0133	148.777	167.677	0.178107	1.05137	1.22929	0.873262	1.05119	0.177923	K00615//transketolase [EC:2.2.1.1]+ko00030//Pentose phosphate pathway+ko01230//Biosynthesis of amino acids+ko01100//Metabolic pathways+ko01110//Biosynthesis of secondary metabolites+ko00710//Carbon fixation in photosynthetic organisms+ko01200//Carbon metabolism	XM_003557192.3 PREDICTED: Brachypodium distachyon transketolase, chloroplastic (LOC100837200), mRNA	PREDICTED: transketolase, chloroplastic [Brachypodium distachyon] >KQK19985.1 hypothetical protein BRADI_1g51670 [Brachypodium distachyon]	Transketolase, thiamine diphosphate binding domain	Transketolase, chloroplastic OS=Zea mays PE=1 SV=1	GO:0008152//metabolic process;GO:0004802//transketolase activity
CL14956.Contig10_All	82.9933	57.8667	58.11	51.3967	-0.51945	-0.502778	-0.688576	0.0166714	-0.169126	-0.185797	K00615//transketolase [EC:2.2.1.1]+ko00030//Pentose phosphate pathway+ko01230//Biosynthesis of amino acids+ko01100//Metabolic pathways+ko01110//Biosynthesis of secondary metabolites+ko00710//Carbon fixation in photosynthetic organisms+ko01200//Carbon metabolism	XM_003557192.3 PREDICTED: Brachypodium distachyon transketolase, chloroplastic (LOC100837200), mRNA	PREDICTED: transketolase, chloroplastic [Brachypodium distachyon] >KQK19985.1 hypothetical protein BRADI_1g51670 [Brachypodium distachyon]	Transketolase, thiamine diphosphate binding domain	Transketolase, chloroplastic OS=Zea mays PE=1 SV=1	GO:0008152//metabolic process;GO:0004802//transketolase activity
Unigene57640_All	3.93	3.43333	2.56333	1.73	-0.194139	-0.607681	-1.1779	-0.413542	-0.983758	-0.570216	K00615//transketolase [EC:2.2.1.1]+ko00030//Pentose phosphate pathway+ko01230//Biosynthesis of amino acids+ko01100//Metabolic pathways+ko01110//Biosynthesis of secondary metabolites+ko00710//Carbon fixation in photosynthetic organisms+ko01200//Carbon metabolism	XM_003581080.3 PREDICTED: Brachypodium distachyon transketolase, chloroplastic-like (LOC100841910), mRNA	PREDICTED: transketolase, chloroplastic-like [Oryza brachyantha]	Transketolase, thiamine diphosphate binding domain	Transketolase, chloroplastic OS=Zea mays PE=1 SV=1	GO:0008152//metabolic process;GO:0004802//transketolase activity
SBPase
CL5196.Contig27_All	4.55	1.96	1.11667	1.98	-1.21382	-2.02023	-1.19109	-0.806413	0.0227309	0.829144	K01100//sedoheptulose-bisphosphatase [EC:3.1.3.37]+ko01100//Metabolic pathways+ko00710//Carbon fixation in photosynthetic organisms+ko01200//Carbon metabolism	XM_003564577.3 PREDICTED: Brachypodium distachyon sedoheptulose-1,7-bisphosphatase, chloroplastic (LOC100828873), mRNA	RecName: Full=Sedoheptulose-1,7-bisphosphatase, chloroplastic; AltName: Full=SED(1,7)P2ase; AltName: Full=Sedoheptulose bisphosphatase; Short=SBPase; Flags: Precursor >CAA46507.1 sedoheptulose-1,7-bisphosphatase (chloroplast) [Triticum aestivum]	Winged helix-turn-helix DNA-binding	Sedoheptulose-1,7-bisphosphatase, chloroplastic OS=Triticum aestivum PE=2 SV=1
CL5196.Contig26_All	7.49	4.00333	9.38333	23.56	-0.900754	0.328509	1.65937	1.22926	2.56012	1.33086	K01100//sedoheptulose-bisphosphatase [EC:3.1.3.37]+ko01100//Metabolic pathways+ko00710//Carbon fixation in photosynthetic organisms+ko01200//Carbon metabolism	XM_003564577.3 PREDICTED: Brachypodium distachyon sedoheptulose-1,7-bisphosphatase, chloroplastic (LOC100828873), mRNA	RecName: Full=Sedoheptulose-1,7-bisphosphatase, chloroplastic; AltName: Full=SED(1,7)P2ase; AltName: Full=Sedoheptulose bisphosphatase; Short=SBPase; Flags: Precursor >CAA46507.1 sedoheptulose-1,7-bisphosphatase (chloroplast) [Triticum aestivum]	Fructose-1-6-bisphosphatase, N-terminal domain	Sedoheptulose-1,7-bisphosphatase, chloroplastic OS=Triticum aestivum PE=2 SV=1
CL5196.Contig6_All	217.25	99.64	154.607	385.863	-1.12113	-0.479611	0.837066	0.64152	1.9582	1.31668	K01100//sedoheptulose-bisphosphatase [EC:3.1.3.37]+ko01100//Metabolic pathways+ko00710//Carbon fixation in photosynthetic organisms+ko01200//Carbon metabolism	XM_003564577.3 PREDICTED: Brachypodium distachyon sedoheptulose-1,7-bisphosphatase, chloroplastic (LOC100828873), mRNA	predicted protein [Hordeum vulgare subsp. vulgare] >BAJ90667.1 predicted protein [Hordeum vulgare subsp. vulgare] >BAJ94694.1 predicted protein [Hordeum vulgare subsp. vulgare] >BAJ96071.1 predicted protein [Hordeum vulgare subsp. vulgare] >BAJ89227.1 predicted protein [Hordeum vulgare subsp. vulgare]	Fructose-1-6-bisphosphatase, N-terminal domain	Sedoheptulose-1,7-bisphosphatase, chloroplastic OS=Triticum aestivum PE=2 SV=1	GO:0005986//sucrose biosynthetic process;GO:0048046//apoplast;GO:0006094//gluconeogenesis;GO:0006000//fructose metabolic process;GO:0042742//defense response to bacterium;GO:0009579//thylakoid;GO:0005737//cytoplasm;GO:0019252//starch biosynthetic process;GO:0050278//sedoheptulose-bisphosphatase activity;GO:0006002//fructose 6-phosphate metabolic process;GO:0009941//chloroplast envelope;GO:0042132…
CL5196.Contig21_All	27.09	9.47	8.80667	24.16	-1.51537	-1.61452	-0.159353	-0.0991539	1.35601	1.45517	K01100//sedoheptulose-bisphosphatase [EC:3.1.3.37]+ko01100//Metabolic pathways+ko00710//Carbon fixation in photosynthetic organisms+ko01200//Carbon metabolism	XM_020325658.1 PREDICTED: Aegilops tauschii subsp. tauschii sedoheptulose-1,7-bisphosphatase, chloroplastic (LOC109766899), mRNA	PREDICTED: sedoheptulose-1,7-bisphosphatase, chloroplastic [Brachypodium distachyon] >KQK10614.1 hypothetical protein BRADI_2g55150 [Brachypodium distachyon]	Fructose-1-6-bisphosphatase, N-terminal domain	Sedoheptulose-1,7-bisphosphatase, chloroplastic OS=Triticum aestivum PE=2 SV=1	GO:0005986//sucrose biosynthetic process;GO:0048046//apoplast;GO:0006094//gluconeogenesis;GO:0006000//fructose metabolic process;GO:0042742//defense response to bacterium;GO:0009579//thylakoid;GO:0005737//cytoplasm;GO:0019252//starch biosynthetic process;GO:0050278//sedoheptulose-bisphosphatase activity;GO:0006002//fructose 6-phosphate metabolic process;GO:0009941//chloroplast envelope;GO:0042132…
CL5196.Contig17_All	83.88	29.11	48.06	124.863	-1.52458	-0.795854	0.579321	0.72873	2.10391	1.37517	K01100//sedoheptulose-bisphosphatase [EC:3.1.3.37]+ko01100//Metabolic pathways+ko00710//Carbon fixation in photosynthetic organisms+ko01200//Carbon metabolism	XM_003564577.3 PREDICTED: Brachypodium distachyon sedoheptulose-1,7-bisphosphatase, chloroplastic (LOC100828873), mRNA	RecName: Full=Sedoheptulose-1,7-bisphosphatase, chloroplastic; AltName: Full=SED(1,7)P2ase; AltName: Full=Sedoheptulose bisphosphatase; Short=SBPase; Flags: Precursor >CAA46507.1 sedoheptulose-1,7-bisphosphatase (chloroplast) [Triticum aestivum]	Fructose-1-6-bisphosphatase, N-terminal domain	Sedoheptulose-1,7-bisphosphatase, chloroplastic OS=Triticum aestivum PE=2 SV=1
RPEase
CL16574.Contig9_All	149.797	94.1133	96.5633	161.06	-0.667224	-0.624537	0.109864	0.0426872	0.777088	0.7344	K01783//ribulose-phosphate 3-epimerase [EC:5.1.3.1]+ko00030//Pentose phosphate pathway+ko01230//Biosynthesis of amino acids+ko00040//Pentose and glucuronate interconversions+ko01100//Metabolic pathways+ko01110//Biosynthesis of secondary metabolites+ko00710//Carbon fixation in photosynthetic organisms+ko01200//Carbon metabolism	XM_003558677.3 PREDICTED: Brachypodium distachyon ribulose-phosphate 3-epimerase, chloroplastic (LOC100826802), transcript variant X1, mRNA	PREDICTED: ribulose-phosphate 3-epimerase, chloroplastic [Brachypodium distachyon] >XP_014752782.1 PREDICTED: ribulose-phosphate 3-epimerase, chloroplastic [Brachypodium distachyon] >KQK23441.1 hypothetical protein BRADI_1g73770 [Brachypodium distachyon]	Ribulose-phosphate 3 epimerase family	Ribulose-phosphate 3-epimerase, chloroplastic OS=Oryza sativa subsp. japonica GN=RPE PE=1 SV=2	GO:0019323//pentose catabolic process;GO:0048046//apoplast;GO:0009409//response to cold;GO:0044262//cellular carbohydrate metabolic process;GO:0009624//response to nematode;GO:0009579//thylakoid;GO:0006098//pentose-phosphate shunt;GO:0046872//metal ion binding;GO:0009052//pentose-phosphate shunt, non-oxidative branch;GO:0005829//cytosol;GO:0005975//carbohydrate metabolic process;GO:0009941//chlor…
CL16574.Contig15_All	124.79	63.5933	77.27	147.243	-0.968931	-0.679785	0.246015	0.289146	1.21495	0.925801	K01783//ribulose-phosphate 3-epimerase [EC:5.1.3.1]+ko00030//Pentose phosphate pathway+ko01230//Biosynthesis of amino acids+ko00040//Pentose and glucuronate interconversions+ko01100//Metabolic pathways+ko01110//Biosynthesis of secondary metabolites+ko00710//Carbon fixation in photosynthetic organisms+ko01200//Carbon metabolism	XM_003558677.3 PREDICTED: Brachypodium distachyon ribulose-phosphate 3-epimerase, chloroplastic (LOC100826802), transcript variant X1, mRNA	PREDICTED: ribulose-phosphate 3-epimerase, chloroplastic [Brachypodium distachyon] >XP_014752782.1 PREDICTED: ribulose-phosphate 3-epimerase, chloroplastic [Brachypodium distachyon] >KQK23441.1 hypothetical protein BRADI_1g73770 [Brachypodium distachyon]	Ribulose-phosphate 3 epimerase family	Ribulose-phosphate 3-epimerase, chloroplastic OS=Oryza sativa subsp. japonica GN=RPE PE=1 SV=2	GO:0019323//pentose catabolic process;GO:0048046//apoplast;GO:0009409//response to cold;GO:0044262//cellular carbohydrate metabolic process;GO:0009624//response to nematode;GO:0009579//thylakoid;GO:0006098//pentose-phosphate shunt;GO:0046872//metal ion binding;GO:0009052//pentose-phosphate shunt, non-oxidative branch;GO:0005829//cytosol;GO:0005975//carbohydrate metabolic process;GO:0009941//chlor…
Unigene66782_All	25.2833	11.8633	13.55	22.7767	-1.08842	-0.884511	-0.144309	0.20391	0.944111	0.740201	K01783//ribulose-phosphate 3-epimerase [EC:5.1.3.1]+ko00030//Pentose phosphate pathway+ko01230//Biosynthesis of amino acids+ko00040//Pentose and glucuronate interconversions+ko01100//Metabolic pathways+ko01110//Biosynthesis of secondary metabolites+ko00710//Carbon fixation in photosynthetic organisms+ko01200//Carbon metabolism	XM_014897296.1 PREDICTED: Brachypodium distachyon ribulose-phosphate 3-epimerase, chloroplastic (LOC100826802), transcript variant X2, mRNA	PREDICTED: ribulose-phosphate 3-epimerase, chloroplastic [Brachypodium distachyon] >XP_014752782.1 PREDICTED: ribulose-phosphate 3-epimerase, chloroplastic [Brachypodium distachyon] >KQK23441.1 hypothetical protein BRADI_1g73770 [Brachypodium distachyon]	Ribulose-phosphate 3 epimerase family	Ribulose-phosphate 3-epimerase, chloroplastic OS=Oryza sativa subsp. japonica GN=RPE PE=1 SV=2	GO:0019323//pentose catabolic process;GO:0048046//apoplast;GO:0009409//response to cold;GO:0044262//cellular carbohydrate metabolic process;GO:0009624//response to nematode;GO:0009579//thylakoid;GO:0006098//pentose-phosphate shunt;GO:0046872//metal ion binding;GO:0009052//pentose-phosphate shunt, non-oxidative branch;GO:0005829//cytosol;GO:0005975//carbohydrate metabolic process;GO:0009941//chlor…
CL16574.Contig28_All	63.42	43.7667	69.8967	150.813	-0.530867	0.148451	1.25767	0.679318	1.78853	1.10921	K01783//ribulose-phosphate 3-epimerase [EC:5.1.3.1]+ko00030//Pentose phosphate pathway+ko01230//Biosynthesis of amino acids+ko00040//Pentose and glucuronate interconversions+ko01100//Metabolic pathways+ko01110//Biosynthesis of secondary metabolites+ko00710//Carbon fixation in photosynthetic organisms+ko01200//Carbon metabolism	XM_003558677.3 PREDICTED: Brachypodium distachyon ribulose-phosphate 3-epimerase, chloroplastic (LOC100826802), transcript variant X1, mRNA	PREDICTED: ribulose-phosphate 3-epimerase, chloroplastic [Brachypodium distachyon] >XP_014752782.1 PREDICTED: ribulose-phosphate 3-epimerase, chloroplastic [Brachypodium distachyon] >KQK23441.1 hypothetical protein BRADI_1g73770 [Brachypodium distachyon]	Ribulose-phosphate 3 epimerase family	Ribulose-phosphate 3-epimerase, chloroplastic OS=Oryza sativa subsp. japonica GN=RPE PE=1 SV=2	GO:0019323//pentose catabolic process;GO:0048046//apoplast;GO:0009409//response to cold;GO:0044262//cellular carbohydrate metabolic process;GO:0009624//response to nematode;GO:0009579//thylakoid;GO:0006098//pentose-phosphate shunt;GO:0046872//metal ion binding;GO:0009052//pentose-phosphate shunt, non-oxidative branch;GO:0005829//cytosol;GO:0005975//carbohydrate metabolic process;GO:0009941//chlor…
CL8842.Contig2_All	0.806667	0.7	1.18333	0.356667	-0.20063	0.56448	-1.16335	0.765111	-0.962722	-1.72783	K01783//ribulose-phosphate 3-epimerase [EC:5.1.3.1]+ko00030//Pentose phosphate pathway+ko01230//Biosynthesis of amino acids+ko00040//Pentose and glucuronate interconversions+ko01100//Metabolic pathways+ko01110//Biosynthesis of secondary metabolites+ko00710//Carbon fixation in photosynthetic organisms+ko01200//Carbon metabolism	FP100765.1 Phyllostachys edulis cDNA clone: bphyst005c21, full insert sequence	PREDICTED: ribulose-phosphate 3-epimerase, cytoplasmic isoform [Brachypodium distachyon] >KQJ90921.1 hypothetical protein BRADI_4g34610 [Brachypodium distachyon]	Ribulose-phosphate 3 epimerase family	Ribulose-phosphate 3-epimerase, cytoplasmic isoform OS=Oryza sativa subsp. japonica GN=Os09g0505700 PE=1 SV=1	GO:0019323//pentose catabolic process;GO:0046872//metal ion binding;GO:0009052//pentose-phosphate shunt, non-oxidative branch;GO:0005829//cytosol;GO:0044262//cellular carbohydrate metabolic process;GO:0004750//ribulose-phosphate 3-epimerase activity
RPIase
CL750.Contig27_All	4.88333	2.21	1.35	5.03667	-1.14215	-1.8498	0.0460551	-0.707645	1.18821	1.89585	K15363//fanconi-associated nuclease 1 [EC:3.1.21.- 3.1.4.1];K01807//ribose 5-phosphate isomerase A [EC:5.3.1.6]+ko00030//Pentose phosphate pathway+ko01230//Biosynthesis of amino acids+ko01100//Metabolic pathways+ko01110//Biosynthesis of secondary metabolites+ko00710//Carbon fixation in photosynthetic organisms+ko01200//Carbon metabolism	XM_010241277.2 PREDICTED: Brachypodium distachyon probable metal-nicotianamine transporter YSL9-like (YSL9), transcript variant X1, mRNA	probable metal-nicotianamine transporter YSL9-like [Brachypodium distachyon] >XP_010239579.1 PREDICTED: probable metal-nicotianamine transporter YSL9-like isoform X1 [Brachypodium distachyon] >ADO64257.1 yellow stripe-like 9 transporter [Brachypodium distachyon] >KQJ83860.1 hypothetical protein BRADI_5g17210 [Brachypodium distachyon] >KQJ83861.1 hypothetical protein BRADI_5g17210 [Brachypodium di…	OPT oligopeptide transporter protein	Probable metal-nicotianamine transporter YSL9 OS=Oryza sativa subsp. japonica GN=YSL9 PE=2 SV=2	GO:0048316//seed development;GO:0051980//iron-nicotianamine transmembrane transporter activity;GO:0016021//integral component of membrane;GO:0010039//response to iron ion;GO:0005886//plasma membrane
CL2119.Contig104_All	5.64	5.72333	9.69	9.03333	0.0244976	0.79231	0.687169	0.767812	0.662672	-0.105141	K01807//ribose 5-phosphate isomerase A [EC:5.3.1.6]+ko00030//Pentose phosphate pathway+ko01230//Biosynthesis of amino acids+ko01100//Metabolic pathways+ko01110//Biosynthesis of secondary metabolites+ko00710//Carbon fixation in photosynthetic organisms+ko01200//Carbon metabolism	XM_003558266.2 PREDICTED: Brachypodium distachyon probable ribose-5-phosphate isomerase 4, chloroplastic (LOC100828827), mRNA	PREDICTED: probable ribose-5-phosphate isomerase 4, chloroplastic [Brachypodium distachyon] >KQK12901.1 hypothetical protein BRADI_1g06750 [Brachypodium distachyon]	Ribose 5-phosphate isomerase A (phosphoriboisomerase A)	Probable ribose-5-phosphate isomerase 4, chloroplastic OS=Arabidopsis thaliana GN=RPI4 PE=2 SV=1	GO:0009052//pentose-phosphate shunt, non-oxidative branch;GO:0004751//ribose-5-phosphate isomerase activity;GO:0009507//chloroplast
CL750.Contig19_All	1.51667	0.723333	0.903333	0.396667	-1.07237	-0.747497	-1.93984	0.324876	-0.867469	-1.19235	K15363//fanconi-associated nuclease 1 [EC:3.1.21.- 3.1.4.1];K01807//ribose 5-phosphate isomerase A [EC:5.3.1.6]+ko00030//Pentose phosphate pathway+ko01230//Biosynthesis of amino acids+ko01100//Metabolic pathways+ko01110//Biosynthesis of secondary metabolites+ko00710//Carbon fixation in photosynthetic organisms+ko01200//Carbon metabolism;K14325//RNA-binding protein with serine-rich domain 1+ko0301…	XM_014896146.1 PREDICTED: Brachypodium distachyon probable metal-nicotianamine transporter YSL9 (LOC100839579), transcript variant X1, mRNA	PREDICTED: probable metal-nicotianamine transporter YSL9 isoform X1 [Brachypodium distachyon]	OPT oligopeptide transporter protein	Probable metal-nicotianamine transporter YSL9 OS=Oryza sativa subsp. japonica GN=YSL9 PE=2 SV=2	GO:0048316//seed development;GO:0051980//iron-nicotianamine transmembrane transporter activity;GO:0016021//integral component of membrane;GO:0010039//response to iron ion;GO:0005886//plasma membrane
CL2119.Contig93_All	19.0167	14.55	15.6867	18.39	-0.383331	-0.26824	-0.0436999	0.115091	0.339631	0.224541	K01807//ribose 5-phosphate isomerase A [EC:5.3.1.6]+ko00030//Pentose phosphate pathway+ko01230//Biosynthesis of amino acids+ko01100//Metabolic pathways+ko01110//Biosynthesis of secondary metabolites+ko00710//Carbon fixation in photosynthetic organisms+ko01200//Carbon metabolism	XM_003558266.2 PREDICTED: Brachypodium distachyon probable ribose-5-phosphate isomerase 4, chloroplastic (LOC100828827), mRNA	PREDICTED: probable ribose-5-phosphate isomerase 4, chloroplastic [Brachypodium distachyon] >KQK12901.1 hypothetical protein BRADI_1g06750 [Brachypodium distachyon]	Ribose 5-phosphate isomerase A (phosphoriboisomerase A)	Probable ribose-5-phosphate isomerase 4, chloroplastic OS=Arabidopsis thaliana GN=RPI4 PE=2 SV=1	GO:0009052//pentose-phosphate shunt, non-oxidative branch;GO:0004751//ribose-5-phosphate isomerase activity;GO:0009507//chloroplast
CL2119.Contig70_All	11.7367	12.8533	16.72	23.6167	0.137436	0.522163	1.01831	0.384727	0.880879	0.496152	K01807//ribose 5-phosphate isomerase A [EC:5.3.1.6]+ko00030//Pentose phosphate pathway+ko01230//Biosynthesis of amino acids+ko01100//Metabolic pathways+ko01110//Biosynthesis of secondary metabolites+ko00710//Carbon fixation in photosynthetic organisms+ko01200//Carbon metabolism	AK065577.1 Oryza sativa Japonica Group cDNA clone:J013026J06, full insert sequence	PREDICTED: probable ribose-5-phosphate isomerase 4, chloroplastic [Brachypodium distachyon] >KQK12901.1 hypothetical protein BRADI_1g06750 [Brachypodium distachyon]	Ribose 5-phosphate isomerase A (phosphoriboisomerase A)	Probable ribose-5-phosphate isomerase 4, chloroplastic OS=Arabidopsis thaliana GN=RPI4 PE=2 SV=1	GO:0009052//pentose-phosphate shunt, non-oxidative branch;GO:0004751//ribose-5-phosphate isomerase activity;GO:0009507//chloroplast
CL5302.Contig6_All	3.54667	4.9	3.50667	4.4	0.467691	-0.00329558	0.317709	-0.470987	-0.149982	0.321005	K15363//fanconi-associated nuclease 1 [EC:3.1.21.- 3.1.4.1];K01807//ribose 5-phosphate isomerase A [EC:5.3.1.6]+ko00030//Pentose phosphate pathway+ko01230//Biosynthesis of amino acids+ko01100//Metabolic pathways+ko01110//Biosynthesis of secondary metabolites+ko00710//Carbon fixation in photosynthetic organisms+ko01200//Carbon metabolism;K13115//coiled-coil domain-containing protein 130;K02184//fo…	XM_003575374.3 PREDICTED: Brachypodium distachyon probable metal-nicotianamine transporter YSL14 (LOC100821226), mRNA	PREDICTED: probable metal-nicotianamine transporter YSL14 [Brachypodium distachyon] >KQK00455.1 hypothetical protein BRADI_3g49520 [Brachypodium distachyon]	OPT oligopeptide transporter protein	Probable metal-nicotianamine transporter YSL14 OS=Oryza sativa subsp. japonica GN=YSL14 PE=2 SV=1	GO:0016021//integral component of membrane;GO:0005886//plasma membrane;GO:0022857//transmembrane transporter activity
CL2119.Contig57_All	1.17333	1.19333	1.75333	2.00667	0.0253462	0.582896	0.776935	0.55755	0.751589	0.19404	K01807//ribose 5-phosphate isomerase A [EC:5.3.1.6]+ko00030//Pentose phosphate pathway+ko01230//Biosynthesis of amino acids+ko01100//Metabolic pathways+ko01110//Biosynthesis of secondary metabolites+ko00710//Carbon fixation in photosynthetic organisms+ko01200//Carbon metabolism	XM_003558266.2 PREDICTED: Brachypodium distachyon probable ribose-5-phosphate isomerase 4, chloroplastic (LOC100828827), mRNA	predicted protein [Hordeum vulgare subsp. vulgare]	Domain of unknown function (DUF4560)	Probable ribose-5-phosphate isomerase 4, chloroplastic OS=Arabidopsis thaliana GN=RPI4 PE=2 SV=1	GO:0009052//pentose-phosphate shunt, non-oxidative branch;GO:0004751//ribose-5-phosphate isomerase activity;GO:0009507//chloroplast
Unigene5374_All	0.11	1.18667	0.63	0.266667	3.43764	2.52997	1.28176	-0.907669	-2.15589	-1.24822	K01807//ribose 5-phosphate isomerase A [EC:5.3.1.6]+ko00030//Pentose phosphate pathway+ko01230//Biosynthesis of amino acids+ko01100//Metabolic pathways+ko01110//Biosynthesis of secondary metabolites+ko00710//Carbon fixation in photosynthetic organisms+ko01200//Carbon metabolism		hypothetical protein F775_04493 [Aegilops tauschii]	Domain of unknown function (DUF4570)
CL843.Contig6_All	1.84333	2.15333	3.28333	1.43	0.226053	0.842062	-0.361349	0.61601	-0.587402	-1.20341	K01807//ribose 5-phosphate isomerase A [EC:5.3.1.6]+ko00030//Pentose phosphate pathway+ko01230//Biosynthesis of amino acids+ko01100//Metabolic pathways+ko01110//Biosynthesis of secondary metabolites+ko00710//Carbon fixation in photosynthetic organisms+ko01200//Carbon metabolism	XM_020317878.1 PREDICTED: Aegilops tauschii subsp. tauschii probable ribose-5-phosphate isomerase 3, chloroplastic (LOC109759034), mRNA	probable ribose-5-phosphate isomerase 3, chloroplastic [Aegilops tauschii subsp. tauschii]	Ribose 5-phosphate isomerase A (phosphoriboisomerase A)	Probable ribose-5-phosphate isomerase 3, chloroplastic OS=Arabidopsis thaliana GN=RPI3 PE=1 SV=1	GO:0009535//chloroplast thylakoid membrane;GO:0009052//pentose-phosphate shunt, non-oxidative branch;GO:0009735//response to cytokinin;GO:0042742//defense response to bacterium;GO:0004751//ribose-5-phosphate isomerase activity;GO:0009941//chloroplast envelope;GO:0009570//chloroplast stroma
CL2119.Contig106_All	0.43	0.366667	0.793333	0.56	-0.211062	0.898557	0.385034	1.10962	0.596095	-0.513523	K01807//ribose 5-phosphate isomerase A [EC:5.3.1.6]+ko00030//Pentose phosphate pathway+ko01230//Biosynthesis of amino acids+ko01100//Metabolic pathways+ko01110//Biosynthesis of secondary metabolites+ko00710//Carbon fixation in photosynthetic organisms+ko01200//Carbon metabolism	AK065577.1 Oryza sativa Japonica Group cDNA clone:J013026J06, full insert sequence	Ribose-5-phosphate isomerase A [Triticum urartu]	Domain of unknown function (DUF4410)	Probable ribose-5-phosphate isomerase 2 OS=Arabidopsis thaliana GN=RPI2 PE=1 SV=1	GO:0009052//pentose-phosphate shunt, non-oxidative branch;GO:0004751//ribose-5-phosphate isomerase activity;GO:0009507//chloroplast
CL13185.Contig8_All	23.0233	12.4767	10.9367	16.1467	-0.882079	-1.06611	-0.507884	-0.184028	0.374195	0.558223	K15363//fanconi-associated nuclease 1 [EC:3.1.21.- 3.1.4.1];K01807//ribose 5-phosphate isomerase A [EC:5.3.1.6]+ko00030//Pentose phosphate pathway+ko01230//Biosynthesis of amino acids+ko01100//Metabolic pathways+ko01110//Biosynthesis of secondary metabolites+ko00710//Carbon fixation in photosynthetic organisms+ko01200//Carbon metabolism	XM_003579578.3 PREDICTED: Brachypodium distachyon probable metal-nicotianamine transporter YSL6 (LOC100840173), mRNA	PREDICTED: probable metal-nicotianamine transporter YSL6 [Brachypodium distachyon] >KQJ82292.1 hypothetical protein BRADI_5g08260 [Brachypodium distachyon]	OPT oligopeptide transporter protein	Probable metal-nicotianamine transporter YSL6 OS=Oryza sativa subsp. japonica GN=YSL6 PE=2 SV=1	GO:0005774//vacuolar membrane;GO:0055085//transmembrane transport;GO:0016021//integral component of membrane;GO:0022857//transmembrane transporter activity
CL2119.Contig128_All	6.51	4.76667	11.18	17.1333	-0.443302	0.791316	1.40819	1.23462	1.85149	0.616876	K01807//ribose 5-phosphate isomerase A [EC:5.3.1.6]+ko00030//Pentose phosphate pathway+ko01230//Biosynthesis of amino acids+ko01100//Metabolic pathways+ko01110//Biosynthesis of secondary metabolites+ko00710//Carbon fixation in photosynthetic organisms+ko01200//Carbon metabolism	XM_020311939.1 PREDICTED: Aegilops tauschii subsp. tauschii probable ribose-5-phosphate isomerase 4, chloroplastic (LOC109753008), mRNA	PREDICTED: probable ribose-5-phosphate isomerase 4, chloroplastic [Brachypodium distachyon] >KQK12901.1 hypothetical protein BRADI_1g06750 [Brachypodium distachyon]	Ribose 5-phosphate isomerase A (phosphoriboisomerase A)	Probable ribose-5-phosphate isomerase 4, chloroplastic OS=Arabidopsis thaliana GN=RPI4 PE=2 SV=1	GO:0009052//pentose-phosphate shunt, non-oxidative branch;GO:0004751//ribose-5-phosphate isomerase activity;GO:0009507//chloroplast
Unigene4725_All	2.21667	1.33667	4.05	2.28333	-0.722291	0.881364	0.0546865	1.60365	0.776977	-0.826677	K01807//ribose 5-phosphate isomerase A [EC:5.3.1.6]+ko00030//Pentose phosphate pathway+ko01230//Biosynthesis of amino acids+ko01100//Metabolic pathways+ko01110//Biosynthesis of secondary metabolites+ko00710//Carbon fixation in photosynthetic organisms+ko01200//Carbon metabolism	XM_003558266.2 PREDICTED: Brachypodium distachyon probable ribose-5-phosphate isomerase 4, chloroplastic (LOC100828827), mRNA	PREDICTED: probable ribose-5-phosphate isomerase 4, chloroplastic [Brachypodium distachyon] >KQK12901.1 hypothetical protein BRADI_1g06750 [Brachypodium distachyon]		Probable ribose-5-phosphate isomerase 4, chloroplastic OS=Arabidopsis thaliana GN=RPI4 PE=2 SV=1	GO:0009052//pentose-phosphate shunt, non-oxidative branch;GO:0004751//ribose-5-phosphate isomerase activity;GO:0009507//chloroplast
CL13185.Contig10_All	2.53	2.23667	2.30667	1.74667	-0.178047	-0.127644	-0.533301	0.050403	-0.355254	-0.405657	K15363//fanconi-associated nuclease 1 [EC:3.1.21.- 3.1.4.1];K01807//ribose 5-phosphate isomerase A [EC:5.3.1.6]+ko00030//Pentose phosphate pathway+ko01230//Biosynthesis of amino acids+ko01100//Metabolic pathways+ko01110//Biosynthesis of secondary metabolites+ko00710//Carbon fixation in photosynthetic organisms+ko01200//Carbon metabolism;K02902//large subunit ribosomal protein L28+ko03010//Ribosom…	XM_014895846.1 PREDICTED: Brachypodium distachyon probable metal-nicotianamine transporter YSL5 (LOC100828262), transcript variant X3, mRNA	PREDICTED: probable metal-nicotianamine transporter YSL5 [Brachypodium distachyon] >XP_014751331.1 PREDICTED: probable metal-nicotianamine transporter YSL5 [Brachypodium distachyon] >XP_014751332.1 PREDICTED: probable metal-nicotianamine transporter YSL5 [Brachypodium distachyon] >KQJ82297.1 hypothetical protein BRADI_5g08277 [Brachypodium distachyon]	OPT oligopeptide transporter protein	Probable metal-nicotianamine transporter YSL5 OS=Oryza sativa subsp. japonica GN=YSL5 PE=2 SV=3	GO:0055085//transmembrane transport;GO:0016021//integral component of membrane
CL843.Contig1_All	136.557	111.917	97.6667	53.3	-0.284563	-0.46457	-1.35119	-0.180007	-1.06663	-0.886621	K01807//ribose 5-phosphate isomerase A [EC:5.3.1.6]+ko00030//Pentose phosphate pathway+ko01230//Biosynthesis of amino acids+ko01100//Metabolic pathways+ko01110//Biosynthesis of secondary metabolites+ko00710//Carbon fixation in photosynthetic organisms+ko01200//Carbon metabolism	XM_003557455.3 PREDICTED: Brachypodium distachyon probable ribose-5-phosphate isomerase 3, chloroplastic (LOC100840549), mRNA	probable ribose-5-phosphate isomerase 3, chloroplastic [Aegilops tauschii subsp. tauschii]	Ribose 5-phosphate isomerase A (phosphoriboisomerase A)	Probable ribose-5-phosphate isomerase 3, chloroplastic OS=Arabidopsis thaliana GN=RPI3 PE=1 SV=1	GO:0009535//chloroplast thylakoid membrane;GO:0009052//pentose-phosphate shunt, non-oxidative branch;GO:0009735//response to cytokinin;GO:0042742//defense response to bacterium;GO:0004751//ribose-5-phosphate isomerase activity;GO:0009941//chloroplast envelope;GO:0009570//chloroplast stroma
CL2119.Contig22_All	0.563333	0.543333	0.75	0.943333	-0.0532484	0.421555	0.750937	0.474803	0.804185	0.329382	K01807//ribose 5-phosphate isomerase A [EC:5.3.1.6]+ko00030//Pentose phosphate pathway+ko01230//Biosynthesis of amino acids+ko01100//Metabolic pathways+ko01110//Biosynthesis of secondary metabolites+ko00710//Carbon fixation in photosynthetic organisms+ko01200//Carbon metabolism	AK362975.1 Hordeum vulgare subsp. vulgare mRNA for predicted protein, complete cds, clone: NIASHv2011O23	PREDICTED: probable ribose-5-phosphate isomerase 4, chloroplastic [Brachypodium distachyon] >KQK12901.1 hypothetical protein BRADI_1g06750 [Brachypodium distachyon]	Ribose 5-phosphate isomerase A (phosphoriboisomerase A)	Probable ribose-5-phosphate isomerase 4, chloroplastic OS=Arabidopsis thaliana GN=RPI4 PE=2 SV=1	GO:0009052//pentose-phosphate shunt, non-oxidative branch;GO:0004751//ribose-5-phosphate isomerase activity;GO:0009507//chloroplast
CL2119.Contig20_All	3.42333	4.55333	4.86	4.98	0.41565	0.517386	0.546663	0.101737	0.131013	0.0292765	K01807//ribose 5-phosphate isomerase A [EC:5.3.1.6]+ko00030//Pentose phosphate pathway+ko01230//Biosynthesis of amino acids+ko01100//Metabolic pathways+ko01110//Biosynthesis of secondary metabolites+ko00710//Carbon fixation in photosynthetic organisms+ko01200//Carbon metabolism	XM_003558266.2 PREDICTED: Brachypodium distachyon probable ribose-5-phosphate isomerase 4, chloroplastic (LOC100828827), mRNA	PREDICTED: probable ribose-5-phosphate isomerase 4, chloroplastic [Brachypodium distachyon] >KQK12901.1 hypothetical protein BRADI_1g06750 [Brachypodium distachyon]	Ribose 5-phosphate isomerase A (phosphoriboisomerase A)	Probable ribose-5-phosphate isomerase 4, chloroplastic OS=Arabidopsis thaliana GN=RPI4 PE=2 SV=1	GO:0009052//pentose-phosphate shunt, non-oxidative branch;GO:0004751//ribose-5-phosphate isomerase activity;GO:0009507//chloroplast
CL5302.Contig1_All	3.71	0.856667	0.536667	0.556667	-2.11499	-2.7798	-2.72989	-0.664807	-0.614901	0.049906	K15363//fanconi-associated nuclease 1 [EC:3.1.21.- 3.1.4.1];K01807//ribose 5-phosphate isomerase A [EC:5.3.1.6]+ko00030//Pentose phosphate pathway+ko01230//Biosynthesis of amino acids+ko01100//Metabolic pathways+ko01110//Biosynthesis of secondary metabolites+ko00710//Carbon fixation in photosynthetic organisms+ko01200//Carbon metabolism	XM_003575374.3 PREDICTED: Brachypodium distachyon probable metal-nicotianamine transporter YSL14 (LOC100821226), mRNA	PREDICTED: probable metal-nicotianamine transporter YSL14 [Brachypodium distachyon] >KQK00455.1 hypothetical protein BRADI_3g49520 [Brachypodium distachyon]	OPT oligopeptide transporter protein	Probable metal-nicotianamine transporter YSL14 OS=Oryza sativa subsp. japonica GN=YSL14 PE=2 SV=1	GO:0016021//integral component of membrane;GO:0005886//plasma membrane;GO:0022857//transmembrane transporter activity
CL2119.Contig126_All	0.823333	0.716667	0.59	0.853333	-0.195393	-0.473386	0.0568136	-0.277994	0.252206	0.5302	K01807//ribose 5-phosphate isomerase A [EC:5.3.1.6]+ko00030//Pentose phosphate pathway+ko01230//Biosynthesis of amino acids+ko01100//Metabolic pathways+ko01110//Biosynthesis of secondary metabolites+ko00710//Carbon fixation in photosynthetic organisms+ko01200//Carbon metabolism	AK334338.1 Triticum aestivum cDNA, clone: WT009_N11, cultivar: Chinese Spring	Ribose-5-phosphate isomerase A [Triticum urartu]		Probable ribose-5-phosphate isomerase 4, chloroplastic OS=Arabidopsis thaliana GN=RPI4 PE=2 SV=1	GO:0009052//pentose-phosphate shunt, non-oxidative branch;GO:0004751//ribose-5-phosphate isomerase activity
CL2059.Contig34_All	0.306667	0.26	0.2	0.173333	-0.228702	-0.60298	-0.804696	-0.374277	-0.575994	-0.201717	K01807//ribose 5-phosphate isomerase A [EC:5.3.1.6]+ko00030//Pentose phosphate pathway+ko01230//Biosynthesis of amino acids+ko01100//Metabolic pathways+ko01110//Biosynthesis of secondary metabolites+ko00710//Carbon fixation in photosynthetic organisms+ko01200//Carbon metabolism;K07478//putative ATPase	NM_001349555.1 Zea mays kinesin-like protein KIN-5C (LOC541861), mRNA	hypothetical protein SETIT_033147mg [Setaria italica]	Myb/SANT-like DNA-binding domain
CL750.Contig24_All	2.76667	2.62667	2.07333	2.13333	-0.0709443	-0.406374	-0.371157	-0.335429	-0.300212	0.035217	K15363//fanconi-associated nuclease 1 [EC:3.1.21.- 3.1.4.1];K01807//ribose 5-phosphate isomerase A [EC:5.3.1.6]+ko00030//Pentose phosphate pathway+ko01230//Biosynthesis of amino acids+ko01100//Metabolic pathways+ko01110//Biosynthesis of secondary metabolites+ko00710//Carbon fixation in photosynthetic organisms+ko01200//Carbon metabolism;K13172//serine/arginine repetitive matrix protein 2	XM_003572715.3 PREDICTED: Brachypodium distachyon metal-nicotianamine transporter YSL2 (LOC100830952), mRNA	PREDICTED: metal-nicotianamine transporter YSL2 [Brachypodium distachyon] >KQK00555.1 hypothetical protein BRADI_3g50260 [Brachypodium distachyon]	OPT oligopeptide transporter protein	Metal-nicotianamine transporter YSL2 OS=Oryza sativa subsp. japonica GN=YSL2 PE=2 SV=2	GO:0048316//seed development;GO:0055085//transmembrane transport;GO:0051980//iron-nicotianamine transmembrane transporter activity;GO:0016021//integral component of membrane;GO:0010039//response to iron ion;GO:0005886//plasma membrane
CL2119.Contig122_All	1.22667	1.44667	1.63667	1.83333	0.238741	0.41683	0.579988	0.178089	0.341246	0.163158	K01807//ribose 5-phosphate isomerase A [EC:5.3.1.6]+ko00030//Pentose phosphate pathway+ko01230//Biosynthesis of amino acids+ko01100//Metabolic pathways+ko01110//Biosynthesis of secondary metabolites+ko00710//Carbon fixation in photosynthetic organisms+ko01200//Carbon metabolism	AK065577.1 Oryza sativa Japonica Group cDNA clone:J013026J06, full insert sequence	PREDICTED: probable ribose-5-phosphate isomerase 4, chloroplastic [Brachypodium distachyon] >KQK12901.1 hypothetical protein BRADI_1g06750 [Brachypodium distachyon]		Probable ribose-5-phosphate isomerase 4, chloroplastic OS=Arabidopsis thaliana GN=RPI4 PE=2 SV=1	GO:0009052//pentose-phosphate shunt, non-oxidative branch;GO:0004751//ribose-5-phosphate isomerase activity;GO:0009507//chloroplast
CL843.Contig10_All	91.1	74.0833	119.663	159.89	-0.294088	0.405029	0.821675	0.699118	1.11576	0.416646	K01807//ribose 5-phosphate isomerase A [EC:5.3.1.6]+ko00030//Pentose phosphate pathway+ko01230//Biosynthesis of amino acids+ko01100//Metabolic pathways+ko01110//Biosynthesis of secondary metabolites+ko00710//Carbon fixation in photosynthetic organisms+ko01200//Carbon metabolism	XM_003557455.3 PREDICTED: Brachypodium distachyon probable ribose-5-phosphate isomerase 3, chloroplastic (LOC100840549), mRNA	PREDICTED: probable ribose-5-phosphate isomerase 3, chloroplastic [Brachypodium distachyon] >KQK20638.1 hypothetical protein BRADI_1g55740 [Brachypodium distachyon]	Ribose 5-phosphate isomerase A (phosphoriboisomerase A)	Probable ribose-5-phosphate isomerase 3, chloroplastic OS=Arabidopsis thaliana GN=RPI3 PE=1 SV=1	GO:0009535//chloroplast thylakoid membrane;GO:0009052//pentose-phosphate shunt, non-oxidative branch;GO:0009735//response to cytokinin;GO:0042742//defense response to bacterium;GO:0004751//ribose-5-phosphate isomerase activity;GO:0009941//chloroplast envelope;GO:0009570//chloroplast stroma
CL2119.Contig35_All	5.74	4.31333	6.10667	5.64333	-0.410389	0.1008	-0.0162094	0.511188	0.394179	-0.117009	K01807//ribose 5-phosphate isomerase A [EC:5.3.1.6]+ko00030//Pentose phosphate pathway+ko01230//Biosynthesis of amino acids+ko01100//Metabolic pathways+ko01110//Biosynthesis of secondary metabolites+ko00710//Carbon fixation in photosynthetic organisms+ko01200//Carbon metabolism	XM_003558266.2 PREDICTED: Brachypodium distachyon probable ribose-5-phosphate isomerase 4, chloroplastic (LOC100828827), mRNA	PREDICTED: probable ribose-5-phosphate isomerase 4, chloroplastic [Brachypodium distachyon] >KQK12901.1 hypothetical protein BRADI_1g06750 [Brachypodium distachyon]	Ribose 5-phosphate isomerase A (phosphoriboisomerase A)	Probable ribose-5-phosphate isomerase 4, chloroplastic OS=Arabidopsis thaliana GN=RPI4 PE=2 SV=1	GO:0009052//pentose-phosphate shunt, non-oxidative branch;GO:0004751//ribose-5-phosphate isomerase activity;GO:0009507//chloroplast
CL12672.Contig1_All	3.54667	5.59	5.54333	3.94333	0.660651	0.657209	0.162485	-0.00344174	-0.498166	-0.494724	K01807//ribose 5-phosphate isomerase A [EC:5.3.1.6]+ko00030//Pentose phosphate pathway+ko01230//Biosynthesis of amino acids+ko01100//Metabolic pathways+ko01110//Biosynthesis of secondary metabolites+ko00710//Carbon fixation in photosynthetic organisms+ko01200//Carbon metabolism	XM_003579397.3 PREDICTED: Brachypodium distachyon probable ribose-5-phosphate isomerase 2 (LOC100827533), mRNA	PREDICTED: probable ribose-5-phosphate isomerase 2 [Brachypodium distachyon] >KQJ82023.1 hypothetical protein BRADI_5g05070 [Brachypodium distachyon]	Ribose 5-phosphate isomerase A (phosphoriboisomerase A)	Probable ribose-5-phosphate isomerase 2 OS=Arabidopsis thaliana GN=RPI2 PE=1 SV=1	GO:0009052//pentose-phosphate shunt, non-oxidative branch;GO:0004751//ribose-5-phosphate isomerase activity
CL12672.Contig4_All	10.3967	17.2967	19.5867	9.54667	0.738111	0.924417	-0.114013	0.186306	-0.852124	-1.03843	K01807//ribose 5-phosphate isomerase A [EC:5.3.1.6]+ko00030//Pentose phosphate pathway+ko01230//Biosynthesis of amino acids+ko01100//Metabolic pathways+ko01110//Biosynthesis of secondary metabolites+ko00710//Carbon fixation in photosynthetic organisms+ko01200//Carbon metabolism	AK335439.1 Triticum aestivum cDNA, clone: WT012_O13, cultivar: Chinese Spring	PREDICTED: probable ribose-5-phosphate isomerase 2 [Brachypodium distachyon] >KQJ82023.1 hypothetical protein BRADI_5g05070 [Brachypodium distachyon]	Casein kinase substrate phosphoprotein PP28	Probable ribose-5-phosphate isomerase 2 OS=Arabidopsis thaliana GN=RPI2 PE=1 SV=1	GO:0009052//pentose-phosphate shunt, non-oxidative branch;GO:0004751//ribose-5-phosphate isomerase activity
Unigene45775_All	1.03	1.29333	1.94333	1.75333	0.33232	0.921478	0.773403	0.589158	0.441083	-0.148075	K08857//NIMA (never in mitosis gene a)-related kinase 1/4/5 [EC:2.7.11.1];K01807//ribose 5-phosphate isomerase A [EC:5.3.1.6]+ko00030//Pentose phosphate pathway+ko01230//Biosynthesis of amino acids+ko01100//Metabolic pathways+ko01110//Biosynthesis of secondary metabolites+ko00710//Carbon fixation in photosynthetic organisms+ko01200//Carbon metabolism	XM_010229995.2 PREDICTED: Brachypodium distachyon serine/threonine-protein kinase Nek3-like (LOC100840244), transcript variant X1, mRNA	PREDICTED: serine/threonine-protein kinase Nek3-like isoform X1 [Brachypodium distachyon] >KQK20636.1 hypothetical protein BRADI_1g55730 [Brachypodium distachyon]	MutL C terminal dimerisation domain	Serine/threonine-protein kinase Nek3 OS=Oryza sativa subsp. japonica GN=NEK3 PE=2 SV=1	GO:0005524//ATP binding;GO:0004672//protein kinase activity
PRKase
CL2846.Contig13_All	387.88	149.487	149.527	332.077	-1.37287	-1.36477	-0.218412	0.00809984	1.15446	1.14636	K00855//phosphoribulokinase [EC:2.7.1.19]+ko01100//Metabolic pathways+ko00710//Carbon fixation in photosynthetic organisms+ko01200//Carbon metabolism	AK334083.1 Triticum aestivum cDNA, clone: WT009_E11, cultivar: Chinese Spring	PREDICTED: phosphoribulokinase, chloroplastic [Oryza sativa Japonica Group] >AAM94337.2 phosphoribulokinase precursor [Oryza sativa Indica Group] >AAN17353.1 phosphoribulokinase precursor [Oryza sativa Indica Group] >BAD07865.1 phosphoribulokinase precursor [Oryza sativa Japonica Group] >BAF09739.1 Os02g0698000 [Oryza sativa Japonica Group] >EAY87173.1 hypothetical protein OsI_08574 [Oryza sativa…	Phosphoribulokinase / Uridine kinase family	Phosphoribulokinase, chloroplastic OS=Triticum aestivum PE=2 SV=1	GO:0009535//chloroplast thylakoid membrane;GO:0048046//apoplast;GO:0005524//ATP binding;GO:0043097//pyrimidine nucleoside salvage;GO:0042742//defense response to bacterium;GO:0099080//supramolecular complex;GO:0005829//cytosol;GO:0009735//response to cytokinin;GO:0005975//carbohydrate metabolic process;GO:0006206//pyrimidine nucleobase metabolic process;GO:0009941//chloroplast envelope;GO:0008974…
Rubisco activase
Unigene11360_All	653.403	27.8067	3.10667	40.3167	-4.55251	-7.70724	-4.01126	-3.15473	0.541251	3.69598	K02960//small subunit ribosomal protein S16e+ko03010//Ribosome;K14306//nuclear pore complex protein Nup62+ko03013//RNA transport	XM_020316601.1 PREDICTED: Aegilops tauschii subsp. tauschii ribulose bisphosphate carboxylase/oxygenase activase B, chloroplastic (LOC109757774), mRNA	ribulose bisphosphate carboxylase activase B [Triticum aestivum] >AGO59018.1 rubisco activase A (chloroplast) [Triticum aestivum] >AMQ67876.1 ribulose bisphosphate carboxylase activase b [Triticum aestivum]	ATPase family associated with various cellular activities (AAA)	Ribulose bisphosphate carboxylase/oxygenase activase B, chloroplastic OS=Hordeum vulgare GN=RCAB PE=2 SV=1
The DEGs discussed in the main text are shown in bold
