# Supplementary material for: Transcriptome-Wide Gene Expression Plasticity in Stipa grandis in Response to Grazing Intensity Differences
Source: Int J Mol Sci. 2021 Nov 2;22(21):11882. doi: 10.3390/ijms222111882 (PMC8611654; doi:10.3390/ijms222111882)
Supplement: Supplementary file 1 [file ijms-22-11882-s001.zip › Table S7. Transcripts Related to the photorespiratory pathway.xlsx]

## Sheet: Sheet1
Gene ID	CK_FPKM	LG_FPKM	MG_FPKM	HG_FPKM	log2(LG/CK)	log2(MG/CK)	log2(HG/CK)	log2(MG/LG)	log2(HG/LG)	log2(HG/MG)	Kegg Orthology	Nt	Nr	Pfam	Swissprot	GO
PGLPase
Unigene4982_All	212.933	84.8067	97.3833	253.033	-1.32424	-1.11991	0.255195	0.204334	1.57944	1.37511	K19269//phosphoglycolate phosphatase [EC:3.1.3.18 3.1.3.48]+ko01100//Metabolic pathways+ko01110//Biosynthesis of secondary metabolites+ko01200//Carbon metabolism+ko00630//Glyoxylate and dicarboxylate metabolism	XM_003579986.3 PREDICTED: Brachypodium distachyon phosphoglycolate phosphatase 1B, chloroplastic-like (LOC100836828), mRNA	phosphoglycolate phosphatase 1B, chloroplastic-like [Aegilops tauschii subsp. tauschii]	Haloacid dehalogenase-like hydrolase	Phosphoglycolate phosphatase 1A, chloroplastic OS=Arabidopsis thaliana GN=PGLP1A PE=1 SV=1	GO:0005829//cytosol;GO:0016311//dephosphorylation;GO:0016791//phosphatase activity
Unigene7915_All	157.143	78.72	98.74	114.07	-0.994531	-0.657382	-0.453256	0.337149	0.541275	0.204126	K19269//phosphoglycolate phosphatase [EC:3.1.3.18 3.1.3.48]+ko01100//Metabolic pathways+ko01110//Biosynthesis of secondary metabolites+ko01200//Carbon metabolism+ko00630//Glyoxylate and dicarboxylate metabolism	XM_020293493.1 PREDICTED: Aegilops tauschii subsp. tauschii phosphoglycolate phosphatase 1B, chloroplastic-like (LOC109734281), mRNA	phosphoglycolate phosphatase 1B, chloroplastic-like [Aegilops tauschii subsp. tauschii]	Haloacid dehalogenase-like hydrolase	Phosphoglycolate phosphatase 1A, chloroplastic OS=Arabidopsis thaliana GN=PGLP1A PE=1 SV=1	GO:0005829//cytosol;GO:0016311//dephosphorylation;GO:0016791//phosphatase activity
Unigene16639_All	4.57333	7.52	7.01	5.96667	0.722623	0.634023	0.398942	-0.0885997	-0.323682	-0.235082	K19269//phosphoglycolate phosphatase [EC:3.1.3.18 3.1.3.48]+ko01100//Metabolic pathways+ko01110//Biosynthesis of secondary metabolites+ko01200//Carbon metabolism+ko00630//Glyoxylate and dicarboxylate metabolism	AK251270.1 Hordeum vulgare subsp. vulgare cDNA clone: FLbaf115i06, mRNA sequence	phosphoglycolate phosphatase 1B, chloroplastic-like [Aegilops tauschii subsp. tauschii]			GO:0005829//cytosol;GO:0016311//dephosphorylation;GO:0016791//phosphatase activity
GOXase
Unigene15561_All	0.153333	0.356667	0.156667	0.11	1.22824	0.0821565	-0.439876	-1.14608	-1.66811	-0.522032	K11517//(S)-2-hydroxy-acid oxidase [EC:1.1.3.15]+ko04146//Peroxisome+ko01100//Metabolic pathways+ko01110//Biosynthesis of secondary metabolites+ko01200//Carbon metabolism+ko00630//Glyoxylate and dicarboxylate metabolism	XM_010238826.2 PREDICTED: Brachypodium distachyon asparagine synthetase domain-containing protein 1 (LOC100834970), mRNA	hypothetical protein BRADI_4g03827 [Brachypodium distachyon]	Asparagine synthase	Peroxisomal (S)-2-hydroxy-acid oxidase GLO1 OS=Oryza sativa subsp. indica GN=GLO1 PE=3 SV=1
CL95.Contig89_All	26.4167	14.8367	15.5067	20.51	-0.828103	-0.755768	-0.35925	0.0723348	0.468852	0.396517	K11517//(S)-2-hydroxy-acid oxidase [EC:1.1.3.15]+ko04146//Peroxisome+ko01100//Metabolic pathways+ko01110//Biosynthesis of secondary metabolites+ko01200//Carbon metabolism+ko00630//Glyoxylate and dicarboxylate metabolism	FP096063.1 Phyllostachys edulis cDNA clone: bphylfb43l16, full insert sequence	Peroxisomal (S)-2-hydroxy-acid oxidase GLO1 [Dichanthelium oligosanthes]	FMN-dependent dehydrogenase	Peroxisomal (S)-2-hydroxy-acid oxidase GLO1 OS=Oryza sativa subsp. japonica GN=GLO1 PE=1 SV=1	GO:0008891//glycolate oxidase activity;GO:0010181//FMN binding;GO:0009853//photorespiration;GO:0019048//modulation by virus of host morphology or physiology;GO:0005777//peroxisome;GO:0010109//regulation of photosynthesis
CL14974.Contig19_All	10.7067	15.7133	11.18	5.78	0.556498	0.0714577	-0.881163	-0.48504	-1.43766	-0.95262	K13344//peroxin-13+ko04146//Peroxisome;K11517//(S)-2-hydroxy-acid oxidase [EC:1.1.3.15]+ko04146//Peroxisome+ko01100//Metabolic pathways+ko01110//Biosynthesis of secondary metabolites+ko01200//Carbon metabolism+ko00630//Glyoxylate and dicarboxylate metabolism	XM_014897084.1 PREDICTED: Brachypodium distachyon peroxisomal membrane protein 13-like (LOC106865857), transcript variant X1, mRNA	predicted protein [Hordeum vulgare subsp. vulgare]	Domain of unknown function (DUF4418)	Peroxisomal membrane protein 13 OS=Arabidopsis thaliana GN=PEX13 PE=1 SV=1	GO:0016560//protein import into peroxisome matrix, docking;GO:0016021//integral component of membrane;GO:0005777//peroxisome
Unigene6184_All	0.713333	0.513333	0.333333	0.92	-0.482433	-1.08727	0.372247	-0.604841	0.85468	1.45952	K11517//(S)-2-hydroxy-acid oxidase [EC:1.1.3.15]+ko04146//Peroxisome+ko01100//Metabolic pathways+ko01110//Biosynthesis of secondary metabolites+ko01200//Carbon metabolism+ko00630//Glyoxylate and dicarboxylate metabolism	FP096177.1 Phyllostachys edulis cDNA clone: bphylf050n17, full insert sequence	PREDICTED: peroxisomal (S)-2-hydroxy-acid oxidase GLO3 [Oryza brachyantha]	FMN-dependent dehydrogenase	Peroxisomal (S)-2-hydroxy-acid oxidase GLO3 OS=Oryza sativa subsp. indica GN=GLO3 PE=3 SV=1	GO:0010181//FMN binding;GO:0016491//oxidoreductase activity
Unigene35157_All	0.37	0.793333	0.566667	0.303333	1.09704	0.614779	-0.287805	-0.482262	-1.38485	-0.902584	K11517//(S)-2-hydroxy-acid oxidase [EC:1.1.3.15]+ko04146//Peroxisome+ko01100//Metabolic pathways+ko01110//Biosynthesis of secondary metabolites+ko01200//Carbon metabolism+ko00630//Glyoxylate and dicarboxylate metabolism	XM_010238826.2 PREDICTED: Brachypodium distachyon asparagine synthetase domain-containing protein 1 (LOC100834970), mRNA	hypothetical protein BRADI_4g03827 [Brachypodium distachyon]	Asparagine synthase	Peroxisomal (S)-2-hydroxy-acid oxidase GLO1 OS=Oryza sativa subsp. indica GN=GLO1 PE=3 SV=1
CL95.Contig35_All	63.01	23.4567	21.8733	27.5333	-1.42342	-1.51357	-1.18868	-0.0901447	0.234744	0.324888	K11517//(S)-2-hydroxy-acid oxidase [EC:1.1.3.15]+ko04146//Peroxisome+ko01100//Metabolic pathways+ko01110//Biosynthesis of secondary metabolites+ko01200//Carbon metabolism+ko00630//Glyoxylate and dicarboxylate metabolism	FP096063.1 Phyllostachys edulis cDNA clone: bphylfb43l16, full insert sequence	PREDICTED: peroxisomal (S)-2-hydroxy-acid oxidase GLO1 [Oryza sativa Japonica Group]	FMN-dependent dehydrogenase	Peroxisomal (S)-2-hydroxy-acid oxidase GLO1 OS=Oryza sativa subsp. japonica GN=GLO1 PE=1 SV=1	GO:0008891//glycolate oxidase activity;GO:0010181//FMN binding;GO:0009853//photorespiration;GO:0019048//modulation by virus of host morphology or physiology;GO:0005777//peroxisome;GO:0010109//regulation of photosynthesis
CL95.Contig34_All	191.347	76.9767	109.887	122.89	-1.3118	-0.788138	-0.633233	0.52366	0.678565	0.154905	K11517//(S)-2-hydroxy-acid oxidase [EC:1.1.3.15]+ko04146//Peroxisome+ko01100//Metabolic pathways+ko01110//Biosynthesis of secondary metabolites+ko01200//Carbon metabolism+ko00630//Glyoxylate and dicarboxylate metabolism	FP096063.1 Phyllostachys edulis cDNA clone: bphylfb43l16, full insert sequence	Peroxisomal (S)-2-hydroxy-acid oxidase GLO1 [Dichanthelium oligosanthes]	FMN-dependent dehydrogenase	Peroxisomal (S)-2-hydroxy-acid oxidase GLO1 OS=Oryza sativa subsp. indica GN=GLO1 PE=3 SV=1	GO:0008891//glycolate oxidase activity;GO:0010181//FMN binding;GO:0009853//photorespiration;GO:0019048//modulation by virus of host morphology or physiology;GO:0005777//peroxisome;GO:0010109//regulation of photosynthesis
Unigene29536_All	0.88	0.456667	1.34333	0.926667	-0.945275	0.626473	0.0893948	1.57175	1.03467	-0.537078	K11517//(S)-2-hydroxy-acid oxidase [EC:1.1.3.15]+ko04146//Peroxisome+ko01100//Metabolic pathways+ko01110//Biosynthesis of secondary metabolites+ko01200//Carbon metabolism+ko00630//Glyoxylate and dicarboxylate metabolism	XM_020329140.1 PREDICTED: Aegilops tauschii subsp. tauschii peroxisomal (S)-2-hydroxy-acid oxidase GLO5 (LOC109770439), mRNA	hypothetical protein OsJ_23125 [Oryza sativa Japonica Group]		Peroxisomal (S)-2-hydroxy-acid oxidase GLO5 OS=Oryza sativa subsp. indica GN=GLO5 PE=3 SV=1
CL95.Contig45_All	236.537	190.883	178.1	146.723	-0.307171	-0.398896	-0.683622	-0.0917256	-0.376452	-0.284726	K11517//(S)-2-hydroxy-acid oxidase [EC:1.1.3.15]+ko04146//Peroxisome+ko01100//Metabolic pathways+ko01110//Biosynthesis of secondary metabolites+ko01200//Carbon metabolism+ko00630//Glyoxylate and dicarboxylate metabolism	CU406521.1 Oryza rufipogon (W1943) cDNA clone: ORW1943S101P08, full insert sequence	PREDICTED: peroxisomal (S)-2-hydroxy-acid oxidase GLO5 isoform X1 [Oryza sativa Japonica Group] >Q6YT73.1 RecName: Full=Peroxisomal (S)-2-hydroxy-acid oxidase GLO5; AltName: Full=Glycolate oxidase 5; Short=GOX 5; Short=OsGLO5; AltName: Full=Short chain alpha-hydroxy acid oxidase GLO5 >B8B7C5.1 RecName: Full=Peroxisomal (S)-2-hydroxy-acid oxidase GLO5; AltName: Full=Glycolate oxidase 5; Short=GOX …	FMN-dependent dehydrogenase	Peroxisomal (S)-2-hydroxy-acid oxidase GLO5 OS=Oryza sativa subsp. japonica GN=GLO5 PE=2 SV=1	GO:0052852//very-long-chain-(S)-2-hydroxy-acid oxidase activity;GO:0009854//oxidative photosynthetic carbon pathway;GO:0005782//peroxisomal matrix;GO:0005777//peroxisome;GO:0008891//glycolate oxidase activity;GO:0034641//cellular nitrogen compound metabolic process;GO:0010181//FMN binding;GO:0052854//medium-chain-(S)-2-hydroxy-acid oxidase activity;GO:0009853//photorespiration;GO:0019048//modulat…
Unigene9650_All	143.587	194.6	443.957	256.773	0.443489	1.63411	0.846334	1.19062	0.402846	-0.787774	K11517//(S)-2-hydroxy-acid oxidase [EC:1.1.3.15]+ko04146//Peroxisome+ko01100//Metabolic pathways+ko01110//Biosynthesis of secondary metabolites+ko01200//Carbon metabolism+ko00630//Glyoxylate and dicarboxylate metabolism	XM_015791374.1 PREDICTED: Oryza sativa Japonica Group peroxisomal (S)-2-hydroxy-acid oxidase GLO5 (LOC4342420), transcript variant X2, mRNA	PREDICTED: peroxisomal (S)-2-hydroxy-acid oxidase GLO5 [Oryza brachyantha]	FMN-dependent dehydrogenase	Peroxisomal (S)-2-hydroxy-acid oxidase GLO5 OS=Oryza sativa subsp. japonica GN=GLO5 PE=2 SV=1	GO:0052852//very-long-chain-(S)-2-hydroxy-acid oxidase activity;GO:0009854//oxidative photosynthetic carbon pathway;GO:0005782//peroxisomal matrix;GO:0005777//peroxisome;GO:0008891//glycolate oxidase activity;GO:0034641//cellular nitrogen compound metabolic process;GO:0010181//FMN binding;GO:0052854//medium-chain-(S)-2-hydroxy-acid oxidase activity;GO:0009853//photorespiration;GO:0019048//modulat…
CL95.Contig74_All	9.57667	6.87333	6.45667	5.02667	-0.47727	-0.557095	-0.925921	-0.0798253	-0.448651	-0.368825	K11517//(S)-2-hydroxy-acid oxidase [EC:1.1.3.15]+ko04146//Peroxisome+ko01100//Metabolic pathways+ko01110//Biosynthesis of secondary metabolites+ko01200//Carbon metabolism+ko00630//Glyoxylate and dicarboxylate metabolism	XM_015791373.1 PREDICTED: Oryza sativa Japonica Group peroxisomal (S)-2-hydroxy-acid oxidase GLO5 (LOC4342420), transcript variant X1, mRNA	PREDICTED: peroxisomal (S)-2-hydroxy-acid oxidase GLO5 isoform X1 [Oryza sativa Japonica Group] >Q6YT73.1 RecName: Full=Peroxisomal (S)-2-hydroxy-acid oxidase GLO5; AltName: Full=Glycolate oxidase 5; Short=GOX 5; Short=OsGLO5; AltName: Full=Short chain alpha-hydroxy acid oxidase GLO5 >B8B7C5.1 RecName: Full=Peroxisomal (S)-2-hydroxy-acid oxidase GLO5; AltName: Full=Glycolate oxidase 5; Short=GOX …	FMN-dependent dehydrogenase	Peroxisomal (S)-2-hydroxy-acid oxidase GLO5 OS=Oryza sativa subsp. indica GN=GLO5 PE=3 SV=1	GO:0052852//very-long-chain-(S)-2-hydroxy-acid oxidase activity;GO:0009854//oxidative photosynthetic carbon pathway;GO:0005782//peroxisomal matrix;GO:0005777//peroxisome;GO:0008891//glycolate oxidase activity;GO:0034641//cellular nitrogen compound metabolic process;GO:0010181//FMN binding;GO:0052854//medium-chain-(S)-2-hydroxy-acid oxidase activity;GO:0009853//photorespiration;GO:0019048//modulat…
Unigene36721_All	1.22	0.71	1.46	1.08333	-0.782369	0.26262	-0.171475	1.04499	0.610894	-0.434094	K11517//(S)-2-hydroxy-acid oxidase [EC:1.1.3.15]+ko04146//Peroxisome+ko01100//Metabolic pathways+ko01110//Biosynthesis of secondary metabolites+ko01200//Carbon metabolism+ko00630//Glyoxylate and dicarboxylate metabolism	AK438717.1 Brachypodium distachyon mRNA, clone: PL016C01-A-094_J09	hypothetical protein TanjilG_08912 [Lupinus angustifolius]	FMN-dependent dehydrogenase	Peroxisomal (S)-2-hydroxy-acid oxidase GLO1 OS=Oryza sativa subsp. japonica GN=GLO1 PE=1 SV=1	GO:0008891//glycolate oxidase activity;GO:0010181//FMN binding;GO:0009853//photorespiration;GO:0019048//modulation by virus of host morphology or physiology;GO:0005777//peroxisome;GO:0010109//regulation of photosynthesis
CL95.Contig47_All	155.693	65.2133	74.1667	89.5967	-1.25339	-1.0584	-0.792543	0.19499	0.460852	0.265862	K11517//(S)-2-hydroxy-acid oxidase [EC:1.1.3.15]+ko04146//Peroxisome+ko01100//Metabolic pathways+ko01110//Biosynthesis of secondary metabolites+ko01200//Carbon metabolism+ko00630//Glyoxylate and dicarboxylate metabolism	FP096063.1 Phyllostachys edulis cDNA clone: bphylfb43l16, full insert sequence	PREDICTED: peroxisomal (S)-2-hydroxy-acid oxidase GLO1 isoform X1 [Oryza brachyantha]	FMN-dependent dehydrogenase	Peroxisomal (S)-2-hydroxy-acid oxidase GLO1 OS=Oryza sativa subsp. indica GN=GLO1 PE=3 SV=1	GO:0008891//glycolate oxidase activity;GO:0010181//FMN binding;GO:0009853//photorespiration;GO:0019048//modulation by virus of host morphology or physiology;GO:0005777//peroxisome;GO:0010109//regulation of photosynthesis
CL95.Contig12_All	1.48	1.29333	2.40667	2.02333	-0.195737	0.704853	0.451137	0.90059	0.646874	-0.253716	K11517//(S)-2-hydroxy-acid oxidase [EC:1.1.3.15]+ko04146//Peroxisome+ko01100//Metabolic pathways+ko01110//Biosynthesis of secondary metabolites+ko01200//Carbon metabolism+ko00630//Glyoxylate and dicarboxylate metabolism	FP096063.1 Phyllostachys edulis cDNA clone: bphylfb43l16, full insert sequence	PREDICTED: peroxisomal (S)-2-hydroxy-acid oxidase GLO1 isoform X1 [Oryza brachyantha]	FMN-dependent dehydrogenase	Peroxisomal (S)-2-hydroxy-acid oxidase GLO5 OS=Oryza sativa subsp. japonica GN=GLO5 PE=2 SV=1	GO:0052852//very-long-chain-(S)-2-hydroxy-acid oxidase activity;GO:0009854//oxidative photosynthetic carbon pathway;GO:0005782//peroxisomal matrix;GO:0005777//peroxisome;GO:0008891//glycolate oxidase activity;GO:0034641//cellular nitrogen compound metabolic process;GO:0010181//FMN binding;GO:0052854//medium-chain-(S)-2-hydroxy-acid oxidase activity;GO:0009853//photorespiration;GO:0019048//modulat…
Unigene36025_All	0.856667	0.643333	1.62667	1.34333	-0.412477	0.931356	0.657897	1.34383	1.07037	-0.273459	K11517//(S)-2-hydroxy-acid oxidase [EC:1.1.3.15]+ko04146//Peroxisome+ko01100//Metabolic pathways+ko01110//Biosynthesis of secondary metabolites+ko01200//Carbon metabolism+ko00630//Glyoxylate and dicarboxylate metabolism	AK438717.1 Brachypodium distachyon mRNA, clone: PL016C01-A-094_J09	Peroxisomal (S)-2-hydroxy-acid oxidase GLO1 [Triticum urartu]	FMN-dependent dehydrogenase	Peroxisomal (S)-2-hydroxy-acid oxidase GLO1 OS=Oryza sativa subsp. japonica GN=GLO1 PE=1 SV=1
GGTase
CL3941.Contig34_All	0.293333	0.106667	0.266667	0.52	-1.43375	-0.137807	0.85032	1.29594	2.28407	0.988127	K14272//glutamate--glyoxylate aminotransferase [EC:2.6.1.4 2.6.1.2 2.6.1.44]+ko00250//Alanine, aspartate and glutamate metabolism+ko00220//Arginine biosynthesis+ko01230//Biosynthesis of amino acids+ko01100//Metabolic pathways+ko01110//Biosynthesis of secondary metabolites+ko00710//Carbon fixation in photosynthetic organisms+ko01210//2-Oxocarboxylic acid metabolism+ko00260//Glycine, serine and thr…	XM_014896408.1 PREDICTED: Brachypodium distachyon glutamate--glyoxylate aminotransferase 2 (LOC100844005), transcript variant X3, mRNA	PREDICTED: glutamate--glyoxylate aminotransferase 2 isoform X2 [Brachypodium distachyon]	Aminotransferase class I and II	Glutamate--glyoxylate aminotransferase 2 OS=Arabidopsis thaliana GN=GGAT2 PE=1 SV=1	GO:0009058//biosynthetic process;GO:0003824//catalytic activity;GO:0030170//pyridoxal phosphate binding
CL3941.Contig15_All	190.653	69.8633	172.11	191.187	-1.44324	-0.133005	0.0131872	1.31024	1.45643	0.146192	K14272//glutamate--glyoxylate aminotransferase [EC:2.6.1.4 2.6.1.2 2.6.1.44]+ko00250//Alanine, aspartate and glutamate metabolism+ko00220//Arginine biosynthesis+ko01230//Biosynthesis of amino acids+ko01100//Metabolic pathways+ko01110//Biosynthesis of secondary metabolites+ko00710//Carbon fixation in photosynthetic organisms+ko01210//2-Oxocarboxylic acid metabolism+ko00260//Glycine, serine and thr…	XM_020293854.1 PREDICTED: Aegilops tauschii subsp. tauschii glutamate--glyoxylate aminotransferase 2 (LOC109734653), transcript variant X1, mRNA	glutamate--glyoxylate aminotransferase 2 isoform X1 [Aegilops tauschii subsp. tauschii]	Aminotransferase class I and II	Glutamate--glyoxylate aminotransferase 2 OS=Arabidopsis thaliana GN=GGAT2 PE=1 SV=1	GO:0009058//biosynthetic process;GO:0003824//catalytic activity;GO:0030170//pyridoxal phosphate binding
CL3941.Contig7_All	0.713333	0.35	0.576667	1.97	-1.03301	-0.302568	1.46006	0.730438	2.49306	1.76262	K14272//glutamate--glyoxylate aminotransferase [EC:2.6.1.4 2.6.1.2 2.6.1.44]+ko00250//Alanine, aspartate and glutamate metabolism+ko00220//Arginine biosynthesis+ko01230//Biosynthesis of amino acids+ko01100//Metabolic pathways+ko01110//Biosynthesis of secondary metabolites+ko00710//Carbon fixation in photosynthetic organisms+ko01210//2-Oxocarboxylic acid metabolism+ko00260//Glycine, serine and thr…	XM_014896408.1 PREDICTED: Brachypodium distachyon glutamate--glyoxylate aminotransferase 2 (LOC100844005), transcript variant X3, mRNA	PREDICTED: glutamate--glyoxylate aminotransferase 2 isoform X3 [Brachypodium distachyon]	Aminotransferase class I and II	Glutamate--glyoxylate aminotransferase 2 OS=Arabidopsis thaliana GN=GGAT2 PE=1 SV=1	GO:0009058//biosynthetic process;GO:0003824//catalytic activity;GO:0030170//pyridoxal phosphate binding
CL3941.Contig28_All	18.6033	7.79667	14.3033	10.9967	-1.25489	-0.376789	-0.75691	0.878104	0.497983	-0.380122	K14272//glutamate--glyoxylate aminotransferase [EC:2.6.1.4 2.6.1.2 2.6.1.44]+ko00250//Alanine, aspartate and glutamate metabolism+ko00220//Arginine biosynthesis+ko01230//Biosynthesis of amino acids+ko01100//Metabolic pathways+ko01110//Biosynthesis of secondary metabolites+ko00710//Carbon fixation in photosynthetic organisms+ko01210//2-Oxocarboxylic acid metabolism+ko00260//Glycine, serine and thr…	XM_014896408.1 PREDICTED: Brachypodium distachyon glutamate--glyoxylate aminotransferase 2 (LOC100844005), transcript variant X3, mRNA	PREDICTED: glutamate--glyoxylate aminotransferase 2 isoform X3 [Brachypodium distachyon]	Aminotransferase class I and II	Glutamate--glyoxylate aminotransferase 2 OS=Arabidopsis thaliana GN=GGAT2 PE=1 SV=1	GO:0009058//biosynthetic process;GO:0003824//catalytic activity;GO:0030170//pyridoxal phosphate binding
SHMTase
Unigene56448_All	4.57	3.4	2.30333	2.40333	-0.424582	-0.983545	-0.922444	-0.558963	-0.497863	0.0611006	K00600//glycine hydroxymethyltransferase [EC:2.1.2.1]+ko00670//One carbon pool by folate+ko01230//Biosynthesis of amino acids+ko01100//Metabolic pathways+ko01110//Biosynthesis of secondary metabolites+ko00460//Cyanoamino acid metabolism+ko00260//Glycine, serine and threonine metabolism+ko01200//Carbon metabolism+ko00630//Glyoxylate and dicarboxylate metabolism	XM_020345044.1 PREDICTED: Aegilops tauschii subsp. tauschii serine hydroxymethyltransferase 7-like (LOC109786470), mRNA	serine hydroxymethyltransferase 7-like [Aegilops tauschii subsp. tauschii]	Serine hydroxymethyltransferase	Serine hydroxymethyltransferase 7 OS=Arabidopsis thaliana GN=SHM7 PE=2 SV=1	GO:0004372//glycine hydroxymethyltransferase activity;GO:0008168//methyltransferase activity;GO:0035999//tetrahydrofolate interconversion;GO:0006545//glycine biosynthetic process
Unigene56459_All	0.83	0.716667	0.506667	0.603333	-0.208194	-0.707209	-0.45614	-0.499016	-0.247946	0.251069	K00600//glycine hydroxymethyltransferase [EC:2.1.2.1]+ko00670//One carbon pool by folate+ko01230//Biosynthesis of amino acids+ko01100//Metabolic pathways+ko01110//Biosynthesis of secondary metabolites+ko00460//Cyanoamino acid metabolism+ko00260//Glycine, serine and threonine metabolism+ko01200//Carbon metabolism+ko00630//Glyoxylate and dicarboxylate metabolism	XM_020345044.1 PREDICTED: Aegilops tauschii subsp. tauschii serine hydroxymethyltransferase 7-like (LOC109786470), mRNA	unnamed protein product [Triticum aestivum]	Serine hydroxymethyltransferase	Serine hydroxymethyltransferase 7 OS=Arabidopsis thaliana GN=SHM7 PE=2 SV=1	GO:0004372//glycine hydroxymethyltransferase activity;GO:0035999//tetrahydrofolate interconversion;GO:0006545//glycine biosynthetic process
CL2235.Contig4_All	1.90667	3.98333	5.88333	3.78	1.06602	1.63105	0.995807	0.565028	-0.0702134	-0.635241	K00600//glycine hydroxymethyltransferase [EC:2.1.2.1]+ko00670//One carbon pool by folate+ko01230//Biosynthesis of amino acids+ko01100//Metabolic pathways+ko01110//Biosynthesis of secondary metabolites+ko00460//Cyanoamino acid metabolism+ko00260//Glycine, serine and threonine metabolism+ko01200//Carbon metabolism+ko00630//Glyoxylate and dicarboxylate metabolism	XM_003576617.3 PREDICTED: Brachypodium distachyon serine hydroxymethyltransferase 4-like (LOC100825645), mRNA	PREDICTED: serine hydroxymethyltransferase 4-like [Brachypodium distachyon] >KQJ86864.1 hypothetical protein BRADI_4g08097 [Brachypodium distachyon]		Serine hydroxymethyltransferase 4 OS=Arabidopsis thaliana GN=SHM4 PE=1 SV=1	GO:0004372//glycine hydroxymethyltransferase activity;GO:0035999//tetrahydrofolate interconversion;GO:0006545//glycine biosynthetic process;GO:0030170//pyridoxal phosphate binding
Unigene49350_All	6.32667	10.18	8.05667	3.36333	0.688652	0.36147	-0.905328	-0.327182	-1.59398	-1.2668	K00600//glycine hydroxymethyltransferase [EC:2.1.2.1]+ko00670//One carbon pool by folate+ko01230//Biosynthesis of amino acids+ko01100//Metabolic pathways+ko01110//Biosynthesis of secondary metabolites+ko00460//Cyanoamino acid metabolism+ko00260//Glycine, serine and threonine metabolism+ko01200//Carbon metabolism+ko00630//Glyoxylate and dicarboxylate metabolism	XM_003576617.3 PREDICTED: Brachypodium distachyon serine hydroxymethyltransferase 4-like (LOC100825645), mRNA	Serine hydroxymethyltransferase 1 [Triticum urartu]	Serine hydroxymethyltransferase	Serine hydroxymethyltransferase 4 OS=Arabidopsis thaliana GN=SHM4 PE=1 SV=1	GO:0004372//glycine hydroxymethyltransferase activity;GO:0035999//tetrahydrofolate interconversion;GO:0006545//glycine biosynthetic process;GO:0030170//pyridoxal phosphate binding
CL3053.Contig39_All	326.94	127.953	95.3933	194.273	-1.35095	-1.76522	-0.746957	-0.414274	0.603988	1.01826	K00600//glycine hydroxymethyltransferase [EC:2.1.2.1]+ko00670//One carbon pool by folate+ko01230//Biosynthesis of amino acids+ko01100//Metabolic pathways+ko01110//Biosynthesis of secondary metabolites+ko00460//Cyanoamino acid metabolism+ko00260//Glycine, serine and threonine metabolism+ko01200//Carbon metabolism+ko00630//Glyoxylate and dicarboxylate metabolism	XM_003559918.2 PREDICTED: Brachypodium distachyon serine hydroxymethyltransferase 1, mitochondrial (LOC100843106), mRNA	serine hydroxymethyltransferase 1, mitochondrial [Aegilops tauschii subsp. tauschii] >ABJ15727.1 serine hydroxymethyltransferase [Triticum monococcum]	Serine hydroxymethyltransferase	Serine hydroxymethyltransferase 1, mitochondrial OS=Flaveria pringlei PE=2 SV=1	GO:0004372//glycine hydroxymethyltransferase activity;GO:0035999//tetrahydrofolate interconversion;GO:0006545//glycine biosynthetic process;GO:0030170//pyridoxal phosphate binding
Unigene56458_All	2.02333	1.59667	1.53333	2.33	-0.340946	-0.395424	0.207562	-0.0544779	0.548508	0.602986	K00600//glycine hydroxymethyltransferase [EC:2.1.2.1]+ko00670//One carbon pool by folate+ko01230//Biosynthesis of amino acids+ko01100//Metabolic pathways+ko01110//Biosynthesis of secondary metabolites+ko00460//Cyanoamino acid metabolism+ko00260//Glycine, serine and threonine metabolism+ko01200//Carbon metabolism+ko00630//Glyoxylate and dicarboxylate metabolism	XM_003564701.3 PREDICTED: Brachypodium distachyon serine hydroxymethyltransferase 7 (LOC100839382), mRNA	PREDICTED: serine hydroxymethyltransferase 7 [Brachypodium distachyon] >KQK10844.1 hypothetical protein BRADI_2g56557 [Brachypodium distachyon]	Serine hydroxymethyltransferase	Serine hydroxymethyltransferase 7 OS=Arabidopsis thaliana GN=SHM7 PE=2 SV=1	GO:0004372//glycine hydroxymethyltransferase activity;GO:0008168//methyltransferase activity;GO:0035999//tetrahydrofolate interconversion;GO:0006545//glycine biosynthetic process
Unigene49346_All	29.2733	30.66	15.0733	8.65333	0.067458	-0.947582	-1.75292	-1.01504	-1.82038	-0.805336	K00600//glycine hydroxymethyltransferase [EC:2.1.2.1]+ko00670//One carbon pool by folate+ko01230//Biosynthesis of amino acids+ko01100//Metabolic pathways+ko01110//Biosynthesis of secondary metabolites+ko00460//Cyanoamino acid metabolism+ko00260//Glycine, serine and threonine metabolism+ko01200//Carbon metabolism+ko00630//Glyoxylate and dicarboxylate metabolism	XM_020329469.1 PREDICTED: Aegilops tauschii subsp. tauschii serine hydroxymethyltransferase 4 (LOC109770763), mRNA	hypothetical protein BRADI_4g19470 [Brachypodium distachyon]	Serine hydroxymethyltransferase	Serine hydroxymethyltransferase 4 OS=Arabidopsis thaliana GN=SHM4 PE=1 SV=1
Unigene61813_All	2.8	3.12333	2.55	1.77	0.159325	-0.121529	-0.649966	-0.280855	-0.809292	-0.528437	K00600//glycine hydroxymethyltransferase [EC:2.1.2.1]+ko00670//One carbon pool by folate+ko01230//Biosynthesis of amino acids+ko01100//Metabolic pathways+ko01110//Biosynthesis of secondary metabolites+ko00460//Cyanoamino acid metabolism+ko00260//Glycine, serine and threonine metabolism+ko01200//Carbon metabolism+ko00630//Glyoxylate and dicarboxylate metabolism	FP097690.1 Phyllostachys edulis cDNA clone: bphyem103h01, full insert sequence	PITH domain-containing protein 1 [Sorghum bicolor] >XP_021313209.1 PITH domain-containing protein 1 [Sorghum bicolor] >EES00918.2 hypothetical protein SORBI_3003G189700 [Sorghum bicolor] >OQU87018.1 hypothetical protein SORBI_3003G189700 [Sorghum bicolor]	PITH domain
CL3053.Contig41_All	595.44	292.293	276.857	541.9	-1.02353	-1.0958	-0.131611	-0.0722755	0.891916	0.964192	K00600//glycine hydroxymethyltransferase [EC:2.1.2.1]+ko00670//One carbon pool by folate+ko01230//Biosynthesis of amino acids+ko01100//Metabolic pathways+ko01110//Biosynthesis of secondary metabolites+ko00460//Cyanoamino acid metabolism+ko00260//Glycine, serine and threonine metabolism+ko01200//Carbon metabolism+ko00630//Glyoxylate and dicarboxylate metabolism	XM_003559918.2 PREDICTED: Brachypodium distachyon serine hydroxymethyltransferase 1, mitochondrial (LOC100843106), mRNA	putative glycine hydroxymethyltransferase [Oryza sativa Japonica Group]	Serine hydroxymethyltransferase	Serine hydroxymethyltransferase 1, mitochondrial OS=Flaveria pringlei PE=2 SV=1	GO:0004372//glycine hydroxymethyltransferase activity;GO:0035999//tetrahydrofolate interconversion;GO:0006545//glycine biosynthetic process;GO:0030170//pyridoxal phosphate binding
Unigene21853_All	3.4	3.74667	2.34667	1.42333	0.143313	-0.523711	-1.24698	-0.667024	-1.3903	-0.723273	K00600//glycine hydroxymethyltransferase [EC:2.1.2.1]+ko00670//One carbon pool by folate+ko01230//Biosynthesis of amino acids+ko01100//Metabolic pathways+ko01110//Biosynthesis of secondary metabolites+ko00460//Cyanoamino acid metabolism+ko00260//Glycine, serine and threonine metabolism+ko01200//Carbon metabolism+ko00630//Glyoxylate and dicarboxylate metabolism	FP097690.1 Phyllostachys edulis cDNA clone: bphyem103h01, full insert sequence	PREDICTED: PITH domain-containing protein 1 [Brachypodium distachyon] >KQK08326.1 hypothetical protein BRADI_2g41230 [Brachypodium distachyon] >KQK08327.1 hypothetical protein BRADI_2g41230 [Brachypodium distachyon] >KQK08328.1 hypothetical protein BRADI_2g41230 [Brachypodium distachyon]	PITH domain
Unigene49351_All	17.5767	21.4	6.87	8.60333	0.284555	-1.34313	-1.02636	-1.62769	-1.31091	0.316776	K00600//glycine hydroxymethyltransferase [EC:2.1.2.1]+ko00670//One carbon pool by folate+ko01230//Biosynthesis of amino acids+ko01100//Metabolic pathways+ko01110//Biosynthesis of secondary metabolites+ko00460//Cyanoamino acid metabolism+ko00260//Glycine, serine and threonine metabolism+ko01200//Carbon metabolism+ko00630//Glyoxylate and dicarboxylate metabolism	XM_020329469.1 PREDICTED: Aegilops tauschii subsp. tauschii serine hydroxymethyltransferase 4 (LOC109770763), mRNA	serine hydroxymethyltransferase 4-like [Aegilops tauschii subsp. tauschii]	Serine hydroxymethyltransferase	Serine hydroxymethyltransferase 4 OS=Arabidopsis thaliana GN=SHM4 PE=1 SV=1	GO:0004372//glycine hydroxymethyltransferase activity;GO:0035999//tetrahydrofolate interconversion;GO:0006545//glycine biosynthetic process;GO:0030170//pyridoxal phosphate binding
CL2235.Contig6_All	4.44333	4.76333	3.38	2.34	0.102488	-0.38249	-0.920374	-0.484978	-1.02286	-0.537884	K00600//glycine hydroxymethyltransferase [EC:2.1.2.1]+ko00670//One carbon pool by folate+ko01230//Biosynthesis of amino acids+ko01100//Metabolic pathways+ko01110//Biosynthesis of secondary metabolites+ko00460//Cyanoamino acid metabolism+ko00260//Glycine, serine and threonine metabolism+ko01200//Carbon metabolism+ko00630//Glyoxylate and dicarboxylate metabolism	FP092883.1 Phyllostachys edulis cDNA clone: bphyem202a06, full insert sequence	serine hydroxymethyltransferase 4-like [Aegilops tauschii subsp. tauschii]	Serine hydroxymethyltransferase	Serine hydroxymethyltransferase 4 OS=Arabidopsis thaliana GN=SHM4 PE=1 SV=1	GO:0004372//glycine hydroxymethyltransferase activity;GO:0035999//tetrahydrofolate interconversion;GO:0006545//glycine biosynthetic process;GO:0030170//pyridoxal phosphate binding
Unigene30934_All	12.24	10.84	5.92	6.46	-0.17172	-1.03289	-0.915914	-0.861171	-0.744194	0.116977	K00600//glycine hydroxymethyltransferase [EC:2.1.2.1]+ko00670//One carbon pool by folate+ko01230//Biosynthesis of amino acids+ko01100//Metabolic pathways+ko01110//Biosynthesis of secondary metabolites+ko00460//Cyanoamino acid metabolism+ko00260//Glycine, serine and threonine metabolism+ko01200//Carbon metabolism+ko00630//Glyoxylate and dicarboxylate metabolism	FP097690.1 Phyllostachys edulis cDNA clone: bphyem103h01, full insert sequence	PREDICTED: PITH domain-containing protein 1 [Brachypodium distachyon] >KQK08326.1 hypothetical protein BRADI_2g41230 [Brachypodium distachyon] >KQK08327.1 hypothetical protein BRADI_2g41230 [Brachypodium distachyon] >KQK08328.1 hypothetical protein BRADI_2g41230 [Brachypodium distachyon]	PITH domain
CL2235.Contig8_All	9.18667	4.84	7.68667	6.82667	-0.920382	-0.245577	-0.4211	0.674806	0.499282	-0.175524	K00600//glycine hydroxymethyltransferase [EC:2.1.2.1]+ko00670//One carbon pool by folate+ko01230//Biosynthesis of amino acids+ko01100//Metabolic pathways+ko01110//Biosynthesis of secondary metabolites+ko00460//Cyanoamino acid metabolism+ko00260//Glycine, serine and threonine metabolism+ko01200//Carbon metabolism+ko00630//Glyoxylate and dicarboxylate metabolism	FP092883.1 Phyllostachys edulis cDNA clone: bphyem202a06, full insert sequence	Serine hydroxymethyltransferase 4 [Ananas comosus]	Serine hydroxymethyltransferase	Serine hydroxymethyltransferase 4 OS=Arabidopsis thaliana GN=SHM4 PE=1 SV=1
Unigene56442_All	1.99333	3.05333	2.90333	2.60667	0.618162	0.550754	0.392321	-0.0674073	-0.225841	-0.158433	K00600//glycine hydroxymethyltransferase [EC:2.1.2.1]+ko00670//One carbon pool by folate+ko01230//Biosynthesis of amino acids+ko01100//Metabolic pathways+ko01110//Biosynthesis of secondary metabolites+ko00460//Cyanoamino acid metabolism+ko00260//Glycine, serine and threonine metabolism+ko01200//Carbon metabolism+ko00630//Glyoxylate and dicarboxylate metabolism	AK330650.1 Triticum aestivum cDNA, clone: SET4_P13, cultivar: Chinese Spring	unnamed protein product [Triticum aestivum]	Serine hydroxymethyltransferase	Serine hydroxymethyltransferase 7 OS=Arabidopsis thaliana GN=SHM7 PE=2 SV=1	GO:0004372//glycine hydroxymethyltransferase activity;GO:0035999//tetrahydrofolate interconversion;GO:0006545//glycine biosynthetic process
CL18.Contig38_All	7.68333	5.23333	6.62	8.50667	-0.55034	-0.211916	0.149908	0.338424	0.700248	0.361824	K00600//glycine hydroxymethyltransferase [EC:2.1.2.1]+ko00670//One carbon pool by folate+ko01230//Biosynthesis of amino acids+ko01100//Metabolic pathways+ko01110//Biosynthesis of secondary metabolites+ko00460//Cyanoamino acid metabolism+ko00260//Glycine, serine and threonine metabolism+ko01200//Carbon metabolism+ko00630//Glyoxylate and dicarboxylate metabolism	XM_020345044.1 PREDICTED: Aegilops tauschii subsp. tauschii serine hydroxymethyltransferase 7-like (LOC109786470), mRNA	PREDICTED: serine hydroxymethyltransferase 7 [Brachypodium distachyon] >KQK10844.1 hypothetical protein BRADI_2g56557 [Brachypodium distachyon]	Serine hydroxymethyltransferase	Serine hydroxymethyltransferase 7 OS=Arabidopsis thaliana GN=SHM7 PE=2 SV=1	GO:0004372//glycine hydroxymethyltransferase activity;GO:0008168//methyltransferase activity;GO:0035999//tetrahydrofolate interconversion;GO:0006545//glycine biosynthetic process
CL3053.Contig75_All	6.10667	2.36	3.39	10.0867	-1.3635	-0.829663	0.73662	0.533834	2.10012	1.56628	K00600//glycine hydroxymethyltransferase [EC:2.1.2.1]+ko00670//One carbon pool by folate+ko01230//Biosynthesis of amino acids+ko01100//Metabolic pathways+ko01110//Biosynthesis of secondary metabolites+ko00460//Cyanoamino acid metabolism+ko00260//Glycine, serine and threonine metabolism+ko01200//Carbon metabolism+ko00630//Glyoxylate and dicarboxylate metabolism	XM_003559918.2 PREDICTED: Brachypodium distachyon serine hydroxymethyltransferase 1, mitochondrial (LOC100843106), mRNA	PREDICTED: serine hydroxymethyltransferase 1, mitochondrial [Brachypodium distachyon] >KQK13310.1 hypothetical protein BRADI_1g09300 [Brachypodium distachyon] >KQK13311.1 hypothetical protein BRADI_1g09300 [Brachypodium distachyon] >KQK13312.1 hypothetical protein BRADI_1g09300 [Brachypodium distachyon]		Serine hydroxymethyltransferase 2, mitochondrial OS=Arabidopsis thaliana GN=SHM2 PE=1 SV=2	GO:0004372//glycine hydroxymethyltransferase activity;GO:0035999//tetrahydrofolate interconversion;GO:0006545//glycine biosynthetic process;GO:0030170//pyridoxal phosphate binding
SGTase
CL593.Contig37_All	31.4167	36.52	54.2467	31.4867	0.220623	0.790991	0.00804765	0.570368	-0.212576	-0.782943	K00830//alanine-glyoxylate transaminase / serine-glyoxylate transaminase / serine-pyruvate transaminase [EC:2.6.1.44 2.6.1.45 2.6.1.51]+ko00250//Alanine, aspartate and glutamate metabolism+ko04146//Peroxisome+ko01100//Metabolic pathways+ko01110//Biosynthesis of secondary metabolites+ko00260//Glycine, serine and threonine metabolism+ko01200//Carbon metabolism+ko00630//Glyoxylate and dicarboxylate …	XM_020306521.1 PREDICTED: Aegilops tauschii subsp. tauschii serine--glyoxylate aminotransferase (LOC109747472), mRNA	hypothetical protein BRADI_3g39750 [Brachypodium distachyon]	Aminotransferase class-V	Serine--glyoxylate aminotransferase OS=Arabidopsis thaliana GN=AGT1 PE=1 SV=2	GO:0003824//catalytic activity
CL593.Contig19_All	59.6367	49.37	51.8067	29.6333	-0.270047	-0.197294	-1.00682	0.0727538	-0.736769	-0.809523	K00830//alanine-glyoxylate transaminase / serine-glyoxylate transaminase / serine-pyruvate transaminase [EC:2.6.1.44 2.6.1.45 2.6.1.51]+ko00250//Alanine, aspartate and glutamate metabolism+ko04146//Peroxisome+ko01100//Metabolic pathways+ko01110//Biosynthesis of secondary metabolites+ko00260//Glycine, serine and threonine metabolism+ko01200//Carbon metabolism+ko00630//Glyoxylate and dicarboxylate …	XM_020306521.1 PREDICTED: Aegilops tauschii subsp. tauschii serine--glyoxylate aminotransferase (LOC109747472), mRNA	PREDICTED: serine--glyoxylate aminotransferase [Oryza sativa Japonica Group] >BAD08917.1 putative aminotransferase [Oryza sativa Japonica Group] >BAD09269.1 putative aminotransferase [Oryza sativa Japonica Group] >BAF24084.1 Os08g0502700 [Oryza sativa Japonica Group] >EAZ07527.1 hypothetical protein OsI_29783 [Oryza sativa Indica Group] >EAZ43252.1 hypothetical protein OsJ_27850 [Oryza sativa Jap…	Aminotransferase class-V	Serine--glyoxylate aminotransferase OS=Arabidopsis thaliana GN=AGT1 PE=1 SV=2	GO:0004760//serine-pyruvate transaminase activity;GO:0050281//serine-glyoxylate transaminase activity;GO:0048046//apoplast;GO:0008453//alanine-glyoxylate transaminase activity;GO:0019265//glycine biosynthetic process, by transamination of glyoxylate;GO:0005777//peroxisome;GO:0005886//plasma membrane;GO:0009570//chloroplast stroma
CL593.Contig33_All	103.75	60.5167	49.47	35.1967	-0.775371	-1.05645	-1.55659	-0.281083	-0.781219	-0.500136	K00830//alanine-glyoxylate transaminase / serine-glyoxylate transaminase / serine-pyruvate transaminase [EC:2.6.1.44 2.6.1.45 2.6.1.51]+ko00250//Alanine, aspartate and glutamate metabolism+ko04146//Peroxisome+ko01100//Metabolic pathways+ko01110//Biosynthesis of secondary metabolites+ko00260//Glycine, serine and threonine metabolism+ko01200//Carbon metabolism+ko00630//Glyoxylate and dicarboxylate …	XM_020306521.1 PREDICTED: Aegilops tauschii subsp. tauschii serine--glyoxylate aminotransferase (LOC109747472), mRNA	hypothetical protein BRADI_3g39750 [Brachypodium distachyon]	Aminotransferase class-V	Serine--glyoxylate aminotransferase OS=Arabidopsis thaliana GN=AGT1 PE=1 SV=2	GO:0004760//serine-pyruvate transaminase activity;GO:0050281//serine-glyoxylate transaminase activity;GO:0048046//apoplast;GO:0008453//alanine-glyoxylate transaminase activity;GO:0005777//peroxisome;GO:0005886//plasma membrane;GO:0009570//chloroplast stroma
CL593.Contig32_All	177.56	218.053	303.413	145.887	0.299965	0.775309	-0.280295	0.475344	-0.58026	-1.0556	K00830//alanine-glyoxylate transaminase / serine-glyoxylate transaminase / serine-pyruvate transaminase [EC:2.6.1.44 2.6.1.45 2.6.1.51]+ko00250//Alanine, aspartate and glutamate metabolism+ko04146//Peroxisome+ko01100//Metabolic pathways+ko01110//Biosynthesis of secondary metabolites+ko00260//Glycine, serine and threonine metabolism+ko01200//Carbon metabolism+ko00630//Glyoxylate and dicarboxylate …	XM_020306521.1 PREDICTED: Aegilops tauschii subsp. tauschii serine--glyoxylate aminotransferase (LOC109747472), mRNA	predicted protein [Hordeum vulgare subsp. vulgare] >BAJ90413.1 predicted protein [Hordeum vulgare subsp. vulgare] >BAJ95504.1 predicted protein [Hordeum vulgare subsp. vulgare] >BAJ95684.1 predicted protein [Hordeum vulgare subsp. vulgare]	Aminotransferase class-V	Serine--glyoxylate aminotransferase OS=Arabidopsis thaliana GN=AGT1 PE=1 SV=2	GO:0004760//serine-pyruvate transaminase activity;GO:0050281//serine-glyoxylate transaminase activity;GO:0048046//apoplast;GO:0008453//alanine-glyoxylate transaminase activity;GO:0005777//peroxisome;GO:0005886//plasma membrane;GO:0009570//chloroplast stroma
CL593.Contig22_All	203.36	198.623	219.793	206.667	-0.0306749	0.115496	0.0265529	0.146171	0.0572278	-0.088943	K00830//alanine-glyoxylate transaminase / serine-glyoxylate transaminase / serine-pyruvate transaminase [EC:2.6.1.44 2.6.1.45 2.6.1.51]+ko00250//Alanine, aspartate and glutamate metabolism+ko04146//Peroxisome+ko01100//Metabolic pathways+ko01110//Biosynthesis of secondary metabolites+ko00260//Glycine, serine and threonine metabolism+ko01200//Carbon metabolism+ko00630//Glyoxylate and dicarboxylate …	XM_020306521.1 PREDICTED: Aegilops tauschii subsp. tauschii serine--glyoxylate aminotransferase (LOC109747472), mRNA	hypothetical protein BRADI_3g39750 [Brachypodium distachyon]	Aminotransferase class-V	Serine--glyoxylate aminotransferase OS=Arabidopsis thaliana GN=AGT1 PE=1 SV=2	GO:0004760//serine-pyruvate transaminase activity;GO:0050281//serine-glyoxylate transaminase activity;GO:0048046//apoplast;GO:0008453//alanine-glyoxylate transaminase activity;GO:0005777//peroxisome;GO:0005886//plasma membrane;GO:0009570//chloroplast stroma
CL593.Contig40_All	2.72667	4.23667	4.49333	3.06	0.640214	0.731717	0.16871	0.0915032	-0.471505	-0.563008	K00830//alanine-glyoxylate transaminase / serine-glyoxylate transaminase / serine-pyruvate transaminase [EC:2.6.1.44 2.6.1.45 2.6.1.51]+ko00250//Alanine, aspartate and glutamate metabolism+ko04146//Peroxisome+ko01100//Metabolic pathways+ko01110//Biosynthesis of secondary metabolites+ko00260//Glycine, serine and threonine metabolism+ko01200//Carbon metabolism+ko00630//Glyoxylate and dicarboxylate …	XM_020306521.1 PREDICTED: Aegilops tauschii subsp. tauschii serine--glyoxylate aminotransferase (LOC109747472), mRNA	predicted protein [Hordeum vulgare subsp. vulgare] >BAJ90413.1 predicted protein [Hordeum vulgare subsp. vulgare] >BAJ95504.1 predicted protein [Hordeum vulgare subsp. vulgare] >BAJ95684.1 predicted protein [Hordeum vulgare subsp. vulgare]	Aminotransferase class-V	Serine--glyoxylate aminotransferase OS=Arabidopsis thaliana GN=AGT1 PE=1 SV=2	GO:0004760//serine-pyruvate transaminase activity;GO:0050281//serine-glyoxylate transaminase activity;GO:0048046//apoplast;GO:0008453//alanine-glyoxylate transaminase activity;GO:0005777//peroxisome;GO:0005886//plasma membrane;GO:0009570//chloroplast stroma
CL593.Contig1_All	190.007	155.493	197.007	80.3233	-0.286516	0.0593213	-1.23891	0.345837	-0.952392	-1.29823	K00830//alanine-glyoxylate transaminase / serine-glyoxylate transaminase / serine-pyruvate transaminase [EC:2.6.1.44 2.6.1.45 2.6.1.51]+ko00250//Alanine, aspartate and glutamate metabolism+ko04146//Peroxisome+ko01100//Metabolic pathways+ko01110//Biosynthesis of secondary metabolites+ko00260//Glycine, serine and threonine metabolism+ko01200//Carbon metabolism+ko00630//Glyoxylate and dicarboxylate …	XM_006659498.2 PREDICTED: Oryza brachyantha serine--glyoxylate aminotransferase (LOC102706217), mRNA	PREDICTED: serine--glyoxylate aminotransferase [Oryza brachyantha]	Aminotransferase class-V	Serine--glyoxylate aminotransferase OS=Arabidopsis thaliana GN=AGT1 PE=1 SV=2	GO:0004760//serine-pyruvate transaminase activity;GO:0050281//serine-glyoxylate transaminase activity;GO:0048046//apoplast;GO:0008453//alanine-glyoxylate transaminase activity;GO:0005777//peroxisome;GO:0005886//plasma membrane;GO:0009570//chloroplast stroma
CATase
Unigene20659_All	665.35	268.293	268.347	437.797	-1.306	-1.29838	-0.599391	0.00761465	0.706605	0.69899	K03781//catalase [EC:1.11.1.6]+ko04016//MAPK signaling pathway - plant+ko04146//Peroxisome+ko00380//Tryptophan metabolism+ko01110//Biosynthesis of secondary metabolites+ko01200//Carbon metabolism+ko00630//Glyoxylate and dicarboxylate metabolism	FP091584.1 Phyllostachys edulis cDNA clone: bphyem206m23, full insert sequence	PREDICTED: catalase-1 [Oryza brachyantha]	Catalase	Catalase-1 OS=Triticum aestivum GN=CAT1 PE=2 SV=1	GO:0006979//response to oxidative stress;GO:0046872//metal ion binding;GO:0020037//heme binding;GO:0004096//catalase activity;GO:0042744//hydrogen peroxide catabolic process;GO:0005777//peroxisome;GO:0005739//mitochondrion;GO:0042542//response to hydrogen peroxide
CL10067.Contig2_All	14.83	23.5867	15.9333	7.35333	0.670379	0.114943	-1.00766	-0.555436	-1.67804	-1.1226	K03781//catalase [EC:1.11.1.6]+ko04016//MAPK signaling pathway - plant+ko04146//Peroxisome+ko00380//Tryptophan metabolism+ko01110//Biosynthesis of secondary metabolites+ko01200//Carbon metabolism+ko00630//Glyoxylate and dicarboxylate metabolism	XM_003563195.2 PREDICTED: Brachypodium distachyon catalase isozyme 1 (LOC100839582), mRNA	catalase isozyme 1 [Zea mays] >ACG48924.1 catalase isozyme B [Zea mays] >ACN25578.1 unknown [Zea mays] >AQK67315.1 Catalase isozyme 1 [Zea mays]	Catalase	Catalase OS=Triticum aestivum GN=CATA PE=2 SV=1	GO:0006979//response to oxidative stress;GO:0046872//metal ion binding;GO:0020037//heme binding;GO:0004096//catalase activity;GO:0042744//hydrogen peroxide catabolic process
CL3229.Contig5_All	1.88	1.72667	2.52333	2.7	-0.116752	0.435453	0.527092	0.552205	0.643844	0.0916391	K03781//catalase [EC:1.11.1.6]+ko04016//MAPK signaling pathway - plant+ko04146//Peroxisome+ko00380//Tryptophan metabolism+ko01110//Biosynthesis of secondary metabolites+ko01200//Carbon metabolism+ko00630//Glyoxylate and dicarboxylate metabolism;K00430//peroxidase [EC:1.11.1.7]+ko01100//Metabolic pathways+ko01110//Biosynthesis of secondary metabolites+ko00940//Phenylpropanoid biosynthesis;K13171//…	AK335701.1 Triticum aestivum cDNA, clone: WT013_I24, cultivar: Chinese Spring	traB domain-containing protein isoform X2 [Aegilops tauschii subsp. tauschii]	TraB family	Formin-like protein 13 OS=Arabidopsis thaliana GN=FH13 PE=2 SV=3
CL10067.Contig4_All	12.83	17.7533	14.3267	6.8	0.470059	0.168725	-0.910705	-0.301334	-1.38076	-1.07943	K03781//catalase [EC:1.11.1.6]+ko04016//MAPK signaling pathway - plant+ko04146//Peroxisome+ko00380//Tryptophan metabolism+ko01110//Biosynthesis of secondary metabolites+ko01200//Carbon metabolism+ko00630//Glyoxylate and dicarboxylate metabolism	XM_003563195.2 PREDICTED: Brachypodium distachyon catalase isozyme 1 (LOC100839582), mRNA	catalase isozyme 1 [Zea mays] >ACG48924.1 catalase isozyme B [Zea mays] >ACN25578.1 unknown [Zea mays] >AQK67315.1 Catalase isozyme 1 [Zea mays]	Catalase	Catalase OS=Triticum aestivum GN=CATA PE=2 SV=1	GO:0006979//response to oxidative stress;GO:0046872//metal ion binding;GO:0020037//heme binding;GO:0004096//catalase activity;GO:0042744//hydrogen peroxide catabolic process
Unigene17925_All	48.2233	12.9667	16.5	26.5267	-1.891	-1.53751	-0.859492	0.35349	1.03151	0.678016	K03781//catalase [EC:1.11.1.6]+ko04016//MAPK signaling pathway - plant+ko04146//Peroxisome+ko00380//Tryptophan metabolism+ko01110//Biosynthesis of secondary metabolites+ko01200//Carbon metabolism+ko00630//Glyoxylate and dicarboxylate metabolism	FP091584.1 Phyllostachys edulis cDNA clone: bphyem206m23, full insert sequence	hypothetical protein PAHAL_I00275 [Panicum hallii]	Catalase	Catalase-1 OS=Triticum aestivum GN=CAT1 PE=2 SV=1	GO:0006979//response to oxidative stress;GO:0046872//metal ion binding;GO:0020037//heme binding;GO:0004096//catalase activity;GO:0042744//hydrogen peroxide catabolic process;GO:0005777//peroxisome;GO:0005739//mitochondrion;GO:0042542//response to hydrogen peroxide
Unigene11709_All	390.91	102.837	104.047	311.38	-1.92242	-1.89958	-0.321816	0.0228335	1.6006	1.57777	K03781//catalase [EC:1.11.1.6]+ko04016//MAPK signaling pathway - plant+ko04146//Peroxisome+ko00380//Tryptophan metabolism+ko01110//Biosynthesis of secondary metabolites+ko01200//Carbon metabolism+ko00630//Glyoxylate and dicarboxylate metabolism	FP091584.1 Phyllostachys edulis cDNA clone: bphyem206m23, full insert sequence	PREDICTED: catalase-1 [Oryza sativa Japonica Group] >ABF93810.1 Catalase-1, putative, expressed [Oryza sativa Japonica Group] >BAF10775.1 Os03g0131200 [Oryza sativa Japonica Group] >BAG88238.1 unnamed protein product [Oryza sativa Japonica Group] >BAG89941.1 unnamed protein product [Oryza sativa Japonica Group] >EEC74449.1 hypothetical protein OsI_09857 [Oryza sativa Indica Group] >EEE58275.1 hyp…	Catalase	Catalase-1 OS=Triticum aestivum GN=CAT1 PE=2 SV=1	GO:0006979//response to oxidative stress;GO:0046872//metal ion binding;GO:0020037//heme binding;GO:0004096//catalase activity;GO:0042744//hydrogen peroxide catabolic process;GO:0005777//peroxisome;GO:0005739//mitochondrion;GO:0042542//response to hydrogen peroxide
CL10067.Contig1_All	1.78	2.17667	1.4	0.55	0.292178	-0.338774	-1.6905	-0.630952	-1.98268	-1.35173	K03781//catalase [EC:1.11.1.6]+ko04016//MAPK signaling pathway - plant+ko04146//Peroxisome+ko00380//Tryptophan metabolism+ko01110//Biosynthesis of secondary metabolites+ko01200//Carbon metabolism+ko00630//Glyoxylate and dicarboxylate metabolism	XM_003563195.2 PREDICTED: Brachypodium distachyon catalase isozyme 1 (LOC100839582), mRNA	hypothetical protein PAHAL_D00225 [Panicum hallii]	Catalase	Catalase isozyme 1 OS=Zea mays GN=CAT1 PE=2 SV=1
CL3229.Contig23_All	5.76333	3.88667	5.45333	4.91	-0.564981	-0.0686047	-0.222785	0.496376	0.342196	-0.15418	K03781//catalase [EC:1.11.1.6]+ko04016//MAPK signaling pathway - plant+ko04146//Peroxisome+ko00380//Tryptophan metabolism+ko01110//Biosynthesis of secondary metabolites+ko01200//Carbon metabolism+ko00630//Glyoxylate and dicarboxylate metabolism;K13171//serine/arginine repetitive matrix protein 1+ko03015//mRNA surveillance pathway+ko03013//RNA transport	XM_020295098.1 PREDICTED: Aegilops tauschii subsp. tauschii traB domain-containing protein (LOC109735898), transcript variant X2, mRNA	traB domain-containing protein isoform X2 [Aegilops tauschii subsp. tauschii]	TraB family
CL8442.Contig1_All	12.6433	14.5667	28.1233	8.48333	0.206448	1.15353	-0.568601	0.947082	-0.775049	-1.72213	K03781//catalase [EC:1.11.1.6]+ko04016//MAPK signaling pathway - plant+ko04146//Peroxisome+ko00380//Tryptophan metabolism+ko01110//Biosynthesis of secondary metabolites+ko01200//Carbon metabolism+ko00630//Glyoxylate and dicarboxylate metabolism	KM201378.1 Stipa purpurea catalase mRNA, partial cds	PREDICTED: catalase isozyme A [Oryza sativa Japonica Group] >Q0E4K1.1 RecName: Full=Catalase isozyme A; Short=CAT-A >P0C549.1 RecName: Full=Catalase isozyme A; Short=CAT-A >BAD07936.1 putative catalase catA [Oryza sativa Japonica Group] >BAD07711.1 putative catalase catA [Oryza sativa Japonica Group] >BAF07587.1 Os02g0115700 [Oryza sativa Japonica Group] >BAG89357.1 unnamed protein product [Oryza…	Catalase	Catalase isozyme A OS=Oryza sativa subsp. indica PE=2 SV=1	GO:0020037//heme binding;GO:0005777//peroxisome;GO:0042542//response to hydrogen peroxide;GO:0006979//response to oxidative stress;GO:0046872//metal ion binding;GO:0004096//catalase activity;GO:0005739//mitochondrion;GO:0042744//hydrogen peroxide catabolic process;GO:0009514//glyoxysome
CL10067.Contig5_All	11.1533	18.5233	10.9533	5.32333	0.732392	-0.0198291	-1.06153	-0.752221	-1.79392	-1.0417	K03781//catalase [EC:1.11.1.6]+ko04016//MAPK signaling pathway - plant+ko04146//Peroxisome+ko00380//Tryptophan metabolism+ko01110//Biosynthesis of secondary metabolites+ko01200//Carbon metabolism+ko00630//Glyoxylate and dicarboxylate metabolism	XM_003563195.2 PREDICTED: Brachypodium distachyon catalase isozyme 1 (LOC100839582), mRNA	catalase isozyme 1 [Zea mays] >ACG48924.1 catalase isozyme B [Zea mays] >ACN25578.1 unknown [Zea mays] >AQK67315.1 Catalase isozyme 1 [Zea mays]	Catalase	Catalase OS=Triticum aestivum GN=CATA PE=2 SV=1	GO:0006979//response to oxidative stress;GO:0046872//metal ion binding;GO:0020037//heme binding;GO:0004096//catalase activity;GO:0042744//hydrogen peroxide catabolic process
CL3229.Contig15_All	9.4	6.12	10.9233	11.11	-0.615423	0.223989	0.24783	0.839412	0.863252	0.0238406	K03781//catalase [EC:1.11.1.6]+ko04016//MAPK signaling pathway - plant+ko04146//Peroxisome+ko00380//Tryptophan metabolism+ko01110//Biosynthesis of secondary metabolites+ko01200//Carbon metabolism+ko00630//Glyoxylate and dicarboxylate metabolism;K13171//serine/arginine repetitive matrix protein 1+ko03015//mRNA surveillance pathway+ko03013//RNA transport	XM_020295098.1 PREDICTED: Aegilops tauschii subsp. tauschii traB domain-containing protein (LOC109735898), transcript variant X2, mRNA	Os08g0545700, partial [Oryza sativa Japonica Group]	TraB family	Formin-like protein 14 OS=Arabidopsis thaliana GN=FH14 PE=3 SV=3
CL8442.Contig4_All	37.2233	59.3067	65.1833	24.18	0.672453	0.814393	-0.615004	0.14194	-1.28746	-1.4294	K03781//catalase [EC:1.11.1.6]+ko04016//MAPK signaling pathway - plant+ko04146//Peroxisome+ko00380//Tryptophan metabolism+ko01110//Biosynthesis of secondary metabolites+ko01200//Carbon metabolism+ko00630//Glyoxylate and dicarboxylate metabolism	KM201378.1 Stipa purpurea catalase mRNA, partial cds	hypothetical protein OsJ_05114 [Oryza sativa Japonica Group]	Catalase	Catalase isozyme A OS=Oryza sativa subsp. japonica GN=CATA PE=2 SV=1	GO:0020037//heme binding;GO:0005777//peroxisome;GO:0042542//response to hydrogen peroxide;GO:0006979//response to oxidative stress;GO:0046872//metal ion binding;GO:0004096//catalase activity;GO:0005739//mitochondrion;GO:0042744//hydrogen peroxide catabolic process;GO:0009514//glyoxysome
CL10067.Contig3_All	6.72667	8.90667	7.18333	5.25	0.407165	0.100679	-0.351383	-0.306486	-0.758548	-0.452062	K03781//catalase [EC:1.11.1.6]+ko04016//MAPK signaling pathway - plant+ko04146//Peroxisome+ko00380//Tryptophan metabolism+ko01110//Biosynthesis of secondary metabolites+ko01200//Carbon metabolism+ko00630//Glyoxylate and dicarboxylate metabolism	XM_003563195.2 PREDICTED: Brachypodium distachyon catalase isozyme 1 (LOC100839582), mRNA	catalase isozyme 1 [Zea mays] >ACG48924.1 catalase isozyme B [Zea mays] >ACN25578.1 unknown [Zea mays] >AQK67315.1 Catalase isozyme 1 [Zea mays]	Catalase	Catalase OS=Triticum aestivum GN=CATA PE=2 SV=1	GO:0006979//response to oxidative stress;GO:0046872//metal ion binding;GO:0020037//heme binding;GO:0004096//catalase activity;GO:0042744//hydrogen peroxide catabolic process
Unigene15777_All	42.24	40.0333	70.9733	137.85	-0.0731888	0.749154	1.71275	0.822343	1.78594	0.963595	K03781//catalase [EC:1.11.1.6]+ko04016//MAPK signaling pathway - plant+ko04146//Peroxisome+ko00380//Tryptophan metabolism+ko01110//Biosynthesis of secondary metabolites+ko01200//Carbon metabolism+ko00630//Glyoxylate and dicarboxylate metabolism	FP091584.1 Phyllostachys edulis cDNA clone: bphyem206m23, full insert sequence	PREDICTED: catalase-1 [Oryza brachyantha]	Catalase	Catalase-1 OS=Triticum aestivum GN=CAT1 PE=2 SV=1	GO:0006979//response to oxidative stress;GO:0046872//metal ion binding;GO:0020037//heme binding;GO:0004096//catalase activity;GO:0042744//hydrogen peroxide catabolic process
CL8442.Contig9_All	40.0267	9.54667	8.95667	11.92	-2.06526	-2.14958	-1.74258	-0.0843178	0.322683	0.407	K03781//catalase [EC:1.11.1.6]+ko04016//MAPK signaling pathway - plant+ko04146//Peroxisome+ko00380//Tryptophan metabolism+ko01110//Biosynthesis of secondary metabolites+ko01200//Carbon metabolism+ko00630//Glyoxylate and dicarboxylate metabolism	FP091584.1 Phyllostachys edulis cDNA clone: bphyem206m23, full insert sequence	hypothetical protein PAHAL_I00275 [Panicum hallii]	Catalase	Catalase-1 OS=Triticum aestivum GN=CAT1 PE=2 SV=1	GO:0006979//response to oxidative stress;GO:0046872//metal ion binding;GO:0020037//heme binding;GO:0004096//catalase activity;GO:0042744//hydrogen peroxide catabolic process
GSase
CL3536.Contig13_All	635.333	448.433	455.473	662.53	-0.500009	-0.468521	0.0649476	0.0314875	0.564956	0.533469	K01915//glutamine synthetase [EC:6.3.1.2]+ko00250//Alanine, aspartate and glutamate metabolism+ko00910//Nitrogen metabolism+ko00220//Arginine biosynthesis+ko01230//Biosynthesis of amino acids+ko01100//Metabolic pathways+ko00630//Glyoxylate and dicarboxylate metabolism	XM_015779836.1 PREDICTED: Oryza sativa Japonica Group glutamine synthetase, chloroplastic (LOC4337272), transcript variant X1, mRNA	PREDICTED: glutamine synthetase, chloroplastic [Oryza brachyantha]	Glutamine synthetase, catalytic domain	Glutamine synthetase, chloroplastic OS=Oryza sativa subsp. japonica GN=GLN2 PE=1 SV=1	GO:0009535//chloroplast thylakoid membrane;GO:0048046//apoplast;GO:0004356//glutamate-ammonia ligase activity;GO:0005524//ATP binding;GO:0006542//glutamine biosynthetic process;GO:0046686//response to cadmium ion;GO:0009651//response to salt stress;GO:0009735//response to cytokinin;GO:0009941//chloroplast envelope;GO:0005739//mitochondrion;GO:0009570//chloroplast stroma;GO:0022626//cytosolic ribo…
CL3536.Contig1_All	11.3	7.46	9.56	9.81	-0.598221	-0.230329	-0.200599	0.367891	0.397621	0.0297301	K01915//glutamine synthetase [EC:6.3.1.2]+ko00250//Alanine, aspartate and glutamate metabolism+ko00910//Nitrogen metabolism+ko00220//Arginine biosynthesis+ko01230//Biosynthesis of amino acids+ko01100//Metabolic pathways+ko00630//Glyoxylate and dicarboxylate metabolism	XM_003580671.3 PREDICTED: Brachypodium distachyon glutamine synthetase, chloroplastic (LOC100842712), mRNA	PREDICTED: glutamine synthetase, chloroplastic [Brachypodium distachyon] >KQJ85047.1 hypothetical protein BRADI_5g24550 [Brachypodium distachyon] >KQJ85048.1 hypothetical protein BRADI_5g24550 [Brachypodium distachyon] >KQJ85049.1 hypothetical protein BRADI_5g24550 [Brachypodium distachyon]	Cupin superfamily protein	Glutamine synthetase leaf isozyme, chloroplastic OS=Hordeum vulgare PE=2 SV=2	GO:0009535//chloroplast thylakoid membrane;GO:0048046//apoplast;GO:0004356//glutamate-ammonia ligase activity;GO:0005524//ATP binding;GO:0006542//glutamine biosynthetic process;GO:0046686//response to cadmium ion;GO:0009651//response to salt stress;GO:0009735//response to cytokinin;GO:0009941//chloroplast envelope;GO:0005739//mitochondrion;GO:0009570//chloroplast stroma;GO:0022626//cytosolic ribo…
CL3209.Contig5_All	0.68	0.936667	0.87	0.906667	0.46412	0.362235	0.420804	-0.101885	-0.0433163	0.0585687	K01915//glutamine synthetase [EC:6.3.1.2]+ko00250//Alanine, aspartate and glutamate metabolism+ko00910//Nitrogen metabolism+ko00220//Arginine biosynthesis+ko01230//Biosynthesis of amino acids+ko01100//Metabolic pathways+ko00630//Glyoxylate and dicarboxylate metabolism	XM_003573950.3 PREDICTED: Brachypodium distachyon protein fluG (LOC100821727), mRNA	PREDICTED: protein fluG [Brachypodium distachyon] >KQJ96946.1 hypothetical protein BRADI_3g27877 [Brachypodium distachyon]	Amidohydrolase		GO:0016787//hydrolase activity;GO:0004356//glutamate-ammonia ligase activity;GO:0006542//glutamine biosynthetic process
CL3536.Contig15_All	0.703333	0.773333	0.806667	1.34	0.147292	0.217238	0.951113	0.0699467	0.803822	0.733875	K01915//glutamine synthetase [EC:6.3.1.2]+ko00250//Alanine, aspartate and glutamate metabolism+ko00910//Nitrogen metabolism+ko00220//Arginine biosynthesis+ko01230//Biosynthesis of amino acids+ko01100//Metabolic pathways+ko00630//Glyoxylate and dicarboxylate metabolism	GQ169689.1 Triticum aestivum cupin gene, partial cds; and plastid glutamine synthetase 2 (GS2) gene, GS2-D1b allele, complete cds	PREDICTED: glutamine synthetase, chloroplastic [Brachypodium distachyon] >KQJ85047.1 hypothetical protein BRADI_5g24550 [Brachypodium distachyon] >KQJ85048.1 hypothetical protein BRADI_5g24550 [Brachypodium distachyon] >KQJ85049.1 hypothetical protein BRADI_5g24550 [Brachypodium distachyon]		Glutamine synthetase, chloroplastic OS=Oryza sativa subsp. japonica GN=GLN2 PE=1 SV=1	GO:0009535//chloroplast thylakoid membrane;GO:0048046//apoplast;GO:0004356//glutamate-ammonia ligase activity;GO:0005524//ATP binding;GO:0006542//glutamine biosynthetic process;GO:0046686//response to cadmium ion;GO:0009651//response to salt stress;GO:0009735//response to cytokinin;GO:0009941//chloroplast envelope;GO:0005739//mitochondrion;GO:0009570//chloroplast stroma;GO:0022626//cytosolic ribo…
CL3536.Contig24_All	0.44	0.57	0.386667	0.473333	0.377915	-0.189936	0.111986	-0.567851	-0.265929	0.301922	K01915//glutamine synthetase [EC:6.3.1.2]+ko00250//Alanine, aspartate and glutamate metabolism+ko00910//Nitrogen metabolism+ko00220//Arginine biosynthesis+ko01230//Biosynthesis of amino acids+ko01100//Metabolic pathways+ko00630//Glyoxylate and dicarboxylate metabolism	XM_014895977.1 PREDICTED: Brachypodium distachyon uncharacterized LOC100839961 (LOC100839961), mRNA	uncharacterized protein LOC109750077 [Aegilops tauschii subsp. tauschii] >EMT11271.1 JmjC domain-containing protein [Aegilops tauschii]	Cupin superfamily protein	Glutamine synthetase, chloroplastic OS=Oryza sativa subsp. japonica GN=GLN2 PE=1 SV=1
CL3536.Contig26_All	42.3767	35.39	86.49	105.573	-0.256882	1.02711	1.3198	1.28399	1.57668	0.292693	K01915//glutamine synthetase [EC:6.3.1.2]+ko00250//Alanine, aspartate and glutamate metabolism+ko00910//Nitrogen metabolism+ko00220//Arginine biosynthesis+ko01230//Biosynthesis of amino acids+ko01100//Metabolic pathways+ko00630//Glyoxylate and dicarboxylate metabolism	XM_003580671.3 PREDICTED: Brachypodium distachyon glutamine synthetase, chloroplastic (LOC100842712), mRNA	PREDICTED: glutamine synthetase, chloroplastic [Oryza brachyantha]	Cupin superfamily protein	Glutamine synthetase, chloroplastic OS=Oryza sativa subsp. japonica GN=GLN2 PE=1 SV=1	GO:0009535//chloroplast thylakoid membrane;GO:0048046//apoplast;GO:0004356//glutamate-ammonia ligase activity;GO:0005524//ATP binding;GO:0006542//glutamine biosynthetic process;GO:0046686//response to cadmium ion;GO:0009651//response to salt stress;GO:0009735//response to cytokinin;GO:0009941//chloroplast envelope;GO:0005739//mitochondrion;GO:0009570//chloroplast stroma;GO:0022626//cytosolic ribo…
CL12113.Contig17_All	4.11	2.48667	1.31	3.21	-0.722297	-1.63583	-0.345715	-0.913531	0.376583	1.29011	K01915//glutamine synthetase [EC:6.3.1.2]+ko00250//Alanine, aspartate and glutamate metabolism+ko00910//Nitrogen metabolism+ko00220//Arginine biosynthesis+ko01230//Biosynthesis of amino acids+ko01100//Metabolic pathways+ko00630//Glyoxylate and dicarboxylate metabolism	XM_003558418.2 PREDICTED: Brachypodium distachyon glutamine synthetase cytosolic isozyme 1-2 (LOC100824429), mRNA	glutamine synthetase 1b [Lolium perenne]	Glutamine synthetase, catalytic domain	Glutamine synthetase cytosolic isozyme 1-2 OS=Oryza sativa subsp. japonica GN=GLN1-2 PE=1 SV=1	GO:0004356//glutamate-ammonia ligase activity;GO:0005524//ATP binding;GO:0006542//glutamine biosynthetic process;GO:0005737//cytoplasm
CL3536.Contig17_All	99.7633	62.2033	60.5833	65.02	-0.680425	-0.705381	-0.613243	-0.0249555	0.0671821	0.0921376	K01915//glutamine synthetase [EC:6.3.1.2]+ko00250//Alanine, aspartate and glutamate metabolism+ko00910//Nitrogen metabolism+ko00220//Arginine biosynthesis+ko01230//Biosynthesis of amino acids+ko01100//Metabolic pathways+ko00630//Glyoxylate and dicarboxylate metabolism	XM_003580671.3 PREDICTED: Brachypodium distachyon glutamine synthetase, chloroplastic (LOC100842712), mRNA	PREDICTED: glutamine synthetase, chloroplastic [Oryza brachyantha]	Glutamine synthetase, beta-Grasp domain	Glutamine synthetase, chloroplastic OS=Oryza sativa subsp. japonica GN=GLN2 PE=1 SV=1	GO:0009535//chloroplast thylakoid membrane;GO:0048046//apoplast;GO:0004356//glutamate-ammonia ligase activity;GO:0005524//ATP binding;GO:0006542//glutamine biosynthetic process;GO:0046686//response to cadmium ion;GO:0009651//response to salt stress;GO:0009735//response to cytokinin;GO:0009941//chloroplast envelope;GO:0005739//mitochondrion;GO:0009570//chloroplast stroma;GO:0022626//cytosolic ribo…
CL3536.Contig25_All	220.03	125.293	167.307	174.907	-0.809874	-0.38205	-0.326386	0.427824	0.483488	0.055664	K01915//glutamine synthetase [EC:6.3.1.2]+ko00250//Alanine, aspartate and glutamate metabolism+ko00910//Nitrogen metabolism+ko00220//Arginine biosynthesis+ko01230//Biosynthesis of amino acids+ko01100//Metabolic pathways+ko00630//Glyoxylate and dicarboxylate metabolism	XM_015836609.1 PREDICTED: Oryza brachyantha glutamine synthetase, chloroplastic (LOC102717985), mRNA	PREDICTED: glutamine synthetase, chloroplastic [Oryza brachyantha]	Glutamine synthetase, catalytic domain	Glutamine synthetase, chloroplastic OS=Oryza sativa subsp. japonica GN=GLN2 PE=1 SV=1	GO:0009535//chloroplast thylakoid membrane;GO:0048046//apoplast;GO:0004356//glutamate-ammonia ligase activity;GO:0005524//ATP binding;GO:0006542//glutamine biosynthetic process;GO:0046686//response to cadmium ion;GO:0009651//response to salt stress;GO:0009735//response to cytokinin;GO:0009941//chloroplast envelope;GO:0005739//mitochondrion;GO:0009570//chloroplast stroma;GO:0022626//cytosolic ribo…
CL3536.Contig23_All	0.293333	0.273333	0.24	0.25	-0.101847	-0.314894	-0.261675	-0.213048	-0.159828	0.0532192	K01915//glutamine synthetase [EC:6.3.1.2]+ko00250//Alanine, aspartate and glutamate metabolism+ko00910//Nitrogen metabolism+ko00220//Arginine biosynthesis+ko01230//Biosynthesis of amino acids+ko01100//Metabolic pathways+ko00630//Glyoxylate and dicarboxylate metabolism	XM_014895977.1 PREDICTED: Brachypodium distachyon uncharacterized LOC100839961 (LOC100839961), mRNA	uncharacterized protein LOC109750077 [Aegilops tauschii subsp. tauschii] >EMT11271.1 JmjC domain-containing protein [Aegilops tauschii]	Cupin superfamily protein	Glutamine synthetase, chloroplastic OS=Oryza sativa subsp. japonica GN=GLN2 PE=1 SV=1
Unigene45021_All	0.326667	0.31	0.273333	0.28	-0.0701699	-0.24807	-0.203144	-0.1779	-0.132974	0.0449264	K01915//glutamine synthetase [EC:6.3.1.2]+ko00250//Alanine, aspartate and glutamate metabolism+ko00910//Nitrogen metabolism+ko00220//Arginine biosynthesis+ko01230//Biosynthesis of amino acids+ko01100//Metabolic pathways+ko00630//Glyoxylate and dicarboxylate metabolism	XM_015836609.1 PREDICTED: Oryza brachyantha glutamine synthetase, chloroplastic (LOC102717985), mRNA	plastidic glutamine synthetase [Phragmites australis] >BAD12058.1 plastidic glutamine synthetase [Phragmites australis]		Glutamine synthetase, chloroplastic OS=Oryza sativa subsp. japonica GN=GLN2 PE=1 SV=1	GO:0009535//chloroplast thylakoid membrane;GO:0048046//apoplast;GO:0004356//glutamate-ammonia ligase activity;GO:0005524//ATP binding;GO:0006542//glutamine biosynthetic process;GO:0046686//response to cadmium ion;GO:0009651//response to salt stress;GO:0009735//response to cytokinin;GO:0009941//chloroplast envelope;GO:0005739//mitochondrion;GO:0009570//chloroplast stroma;GO:0022626//cytosolic ribo…
CL3209.Contig3_All	2.10333	3.64333	5.48	3.56	0.798184	1.39009	0.765572	0.591906	-0.0326117	-0.624518	K01915//glutamine synthetase [EC:6.3.1.2]+ko00250//Alanine, aspartate and glutamate metabolism+ko00910//Nitrogen metabolism+ko00220//Arginine biosynthesis+ko01230//Biosynthesis of amino acids+ko01100//Metabolic pathways+ko00630//Glyoxylate and dicarboxylate metabolism	XM_003573950.3 PREDICTED: Brachypodium distachyon protein fluG (LOC100821727), mRNA	Protein fluG [Aegilops tauschii]	Glutamine synthetase, catalytic domain		GO:0016787//hydrolase activity;GO:0004356//glutamate-ammonia ligase activity;GO:0006542//glutamine biosynthetic process
CL12113.Contig14_All	61.13	91.6	36.22	25.1167	0.584253	-0.743564	-1.27803	-1.32782	-1.86228	-0.534463	K01915//glutamine synthetase [EC:6.3.1.2]+ko00250//Alanine, aspartate and glutamate metabolism+ko00910//Nitrogen metabolism+ko00220//Arginine biosynthesis+ko01230//Biosynthesis of amino acids+ko01100//Metabolic pathways+ko00630//Glyoxylate and dicarboxylate metabolism	XM_010237849.2 PREDICTED: Brachypodium distachyon glutamine synthetase cytosolic isozyme 1-1 (LOC100845598), mRNA	glutamine synthetase-1, partial [Secale cereale]	Glutamine synthetase, catalytic domain	Glutamine synthetase cytosolic isozyme 1-1 OS=Oryza sativa subsp. japonica GN=GLN1-1 PE=1 SV=1	GO:0004356//glutamate-ammonia ligase activity;GO:0005524//ATP binding;GO:0006542//glutamine biosynthetic process;GO:0005737//cytoplasm
CL3536.Contig16_All	0.906667	0.763333	1.11667	1.18	-0.246126	0.301272	0.382653	0.547398	0.628779	0.0813806	K01915//glutamine synthetase [EC:6.3.1.2]+ko00250//Alanine, aspartate and glutamate metabolism+ko00910//Nitrogen metabolism+ko00220//Arginine biosynthesis+ko01230//Biosynthesis of amino acids+ko01100//Metabolic pathways+ko00630//Glyoxylate and dicarboxylate metabolism	XM_003580671.3 PREDICTED: Brachypodium distachyon glutamine synthetase, chloroplastic (LOC100842712), mRNA	PREDICTED: glutamine synthetase, chloroplastic [Oryza brachyantha]	Glutamine synthetase, beta-Grasp domain	Glutamine synthetase, chloroplastic OS=Oryza sativa subsp. japonica GN=GLN2 PE=1 SV=1	GO:0009535//chloroplast thylakoid membrane;GO:0048046//apoplast;GO:0004356//glutamate-ammonia ligase activity;GO:0005524//ATP binding;GO:0006542//glutamine biosynthetic process;GO:0046686//response to cadmium ion;GO:0009651//response to salt stress;GO:0009735//response to cytokinin;GO:0009941//chloroplast envelope;GO:0005739//mitochondrion;GO:0009570//chloroplast stroma;GO:0022626//cytosolic ribo…
CL3209.Contig7_All	1.03667	1.26667	0.69	0.643333	0.291934	-0.572953	-0.691455	-0.864887	-0.98339	-0.118502	K01915//glutamine synthetase [EC:6.3.1.2]+ko00250//Alanine, aspartate and glutamate metabolism+ko00910//Nitrogen metabolism+ko00220//Arginine biosynthesis+ko01230//Biosynthesis of amino acids+ko01100//Metabolic pathways+ko00630//Glyoxylate and dicarboxylate metabolism	XM_003573950.3 PREDICTED: Brachypodium distachyon protein fluG (LOC100821727), mRNA	PREDICTED: protein fluG [Brachypodium distachyon] >KQJ96946.1 hypothetical protein BRADI_3g27877 [Brachypodium distachyon]	Glutamine synthetase, catalytic domain		GO:0016787//hydrolase activity;GO:0004356//glutamate-ammonia ligase activity;GO:0006542//glutamine biosynthetic process
CL3536.Contig8_All	99.07	57.9	72.0733	78.14	-0.773668	-0.448223	-0.338753	0.325445	0.434915	0.10947	K01915//glutamine synthetase [EC:6.3.1.2]+ko00250//Alanine, aspartate and glutamate metabolism+ko00910//Nitrogen metabolism+ko00220//Arginine biosynthesis+ko01230//Biosynthesis of amino acids+ko01100//Metabolic pathways+ko00630//Glyoxylate and dicarboxylate metabolism	XM_015779836.1 PREDICTED: Oryza sativa Japonica Group glutamine synthetase, chloroplastic (LOC4337272), transcript variant X1, mRNA	PREDICTED: glutamine synthetase, chloroplastic [Oryza brachyantha]	Glutamine synthetase, catalytic domain	Glutamine synthetase, chloroplastic OS=Oryza sativa subsp. japonica GN=GLN2 PE=1 SV=1	GO:0009535//chloroplast thylakoid membrane;GO:0048046//apoplast;GO:0004356//glutamate-ammonia ligase activity;GO:0005524//ATP binding;GO:0006542//glutamine biosynthetic process;GO:0046686//response to cadmium ion;GO:0009651//response to salt stress;GO:0009735//response to cytokinin;GO:0009941//chloroplast envelope;GO:0005739//mitochondrion;GO:0009570//chloroplast stroma;GO:0022626//cytosolic ribo…
Unigene30376_All	16.3067	14.0433	18.8933	17.7	-0.21305	0.214884	0.121373	0.427933	0.334422	-0.0935111	K01915//glutamine synthetase [EC:6.3.1.2]+ko00250//Alanine, aspartate and glutamate metabolism+ko00910//Nitrogen metabolism+ko00220//Arginine biosynthesis+ko01230//Biosynthesis of amino acids+ko01100//Metabolic pathways+ko00630//Glyoxylate and dicarboxylate metabolism	EF552589.1 Bambusa oldhamii phosphoglucomutase (PGM) mRNA, complete cds	hypothetical protein PAHAL_I02027 [Panicum hallii]	Glutamine synthetase, catalytic domain	Glutamine synthetase nodule isozyme OS=Vigna aconitifolia PE=2 SV=1	GO:0004356//glutamate-ammonia ligase activity;GO:0005524//ATP binding;GO:0006542//glutamine biosynthetic process
CL12113.Contig8_All	6.31333	14.09	2.77667	1.33667	1.15846	-1.17298	-2.23499	-2.33143	-3.39345	-1.06202	K01915//glutamine synthetase [EC:6.3.1.2]+ko00250//Alanine, aspartate and glutamate metabolism+ko00910//Nitrogen metabolism+ko00220//Arginine biosynthesis+ko01230//Biosynthesis of amino acids+ko01100//Metabolic pathways+ko00630//Glyoxylate and dicarboxylate metabolism	XM_010237849.2 PREDICTED: Brachypodium distachyon glutamine synthetase cytosolic isozyme 1-1 (LOC100845598), mRNA	hypothetical protein PAHAL_A03327 [Panicum hallii]	Glutamine synthetase, catalytic domain	Glutamine synthetase cytosolic isozyme 1-1 OS=Oryza sativa subsp. japonica GN=GLN1-1 PE=1 SV=1	GO:0004356//glutamate-ammonia ligase activity;GO:0005524//ATP binding;GO:0006542//glutamine biosynthetic process;GO:0005737//cytoplasm
GDCase
CL1834.Contig20_All	0.486667	0.223333	0.183333	0.3	-1.12554	-1.39725	-0.685763	-0.271715	0.439773	0.711488	K00281//glycine dehydrogenase [EC:1.4.4.2]+ko01100//Metabolic pathways+ko01110//Biosynthesis of secondary metabolites+ko00260//Glycine, serine and threonine metabolism+ko01200//Carbon metabolism+ko00630//Glyoxylate and dicarboxylate metabolism	AK335574.1 Triticum aestivum cDNA, clone: WT013_E02, cultivar: Chinese Spring	glycine dehydrogenase (decarboxylating) 1, mitochondrial-like [Aegilops tauschii subsp. tauschii]	Glycine cleavage system P-protein	Glycine dehydrogenase (decarboxylating), mitochondrial OS=Flaveria trinervia GN=GDCSPA PE=3 SV=1	GO:0006546//glycine catabolic process;GO:0005739//mitochondrion;GO:0004375//glycine dehydrogenase (decarboxylating) activity
CL1834.Contig22_All	96.09	36.0667	39.11	84.1	-1.41081	-1.28789	-0.190543	0.122917	1.22027	1.09735	K00281//glycine dehydrogenase [EC:1.4.4.2]+ko01100//Metabolic pathways+ko01110//Biosynthesis of secondary metabolites+ko00260//Glycine, serine and threonine metabolism+ko01200//Carbon metabolism+ko00630//Glyoxylate and dicarboxylate metabolism	XM_003569621.3 PREDICTED: Brachypodium distachyon glycine dehydrogenase (decarboxylating) 2, mitochondrial (LOC100845191), mRNA	unnamed protein product [Triticum aestivum]	Glycine cleavage system P-protein	Glycine dehydrogenase (decarboxylating) A, mitochondrial OS=Flaveria pringlei GN=GDCSPA PE=2 SV=1	GO:0006546//glycine catabolic process;GO:0005739//mitochondrion;GO:0004375//glycine dehydrogenase (decarboxylating) activity
CL1834.Contig3_All	93.14	44.4667	45.1867	123.957	-1.06395	-1.03541	0.414576	0.0285452	1.47853	1.44998	K00281//glycine dehydrogenase [EC:1.4.4.2]+ko01100//Metabolic pathways+ko01110//Biosynthesis of secondary metabolites+ko00260//Glycine, serine and threonine metabolism+ko01200//Carbon metabolism+ko00630//Glyoxylate and dicarboxylate metabolism	XM_003569621.3 PREDICTED: Brachypodium distachyon glycine dehydrogenase (decarboxylating) 2, mitochondrial (LOC100845191), mRNA	glycine dehydrogenase (decarboxylating) 1, mitochondrial-like [Aegilops tauschii subsp. tauschii]	Glycine cleavage system P-protein	Glycine dehydrogenase (decarboxylating), mitochondrial OS=Solanum tuberosum GN=GDCSP PE=2 SV=1	GO:0006546//glycine catabolic process;GO:0005739//mitochondrion;GO:0004375//glycine dehydrogenase (decarboxylating) activity
CL1834.Contig11_All	8.02333	2.54	2.11	5.69	-1.65493	-1.91678	-0.493615	-0.261853	1.16131	1.42317	K00281//glycine dehydrogenase [EC:1.4.4.2]+ko01100//Metabolic pathways+ko01110//Biosynthesis of secondary metabolites+ko00260//Glycine, serine and threonine metabolism+ko01200//Carbon metabolism+ko00630//Glyoxylate and dicarboxylate metabolism	XM_003569621.3 PREDICTED: Brachypodium distachyon glycine dehydrogenase (decarboxylating) 2, mitochondrial (LOC100845191), mRNA	glycine dehydrogenase (decarboxylating) 1, mitochondrial-like [Aegilops tauschii subsp. tauschii]	Glycine cleavage system P-protein	Glycine dehydrogenase (decarboxylating), mitochondrial OS=Solanum tuberosum GN=GDCSP PE=2 SV=1	GO:0006546//glycine catabolic process;GO:0005739//mitochondrion;GO:0004375//glycine dehydrogenase (decarboxylating) activity
CL1834.Contig35_All	0.663333	0.193333	0.21	0.776667	-1.79121	-1.64315	0.232615	0.148052	2.02382	1.87577	K00281//glycine dehydrogenase [EC:1.4.4.2]+ko01100//Metabolic pathways+ko01110//Biosynthesis of secondary metabolites+ko00260//Glycine, serine and threonine metabolism+ko01200//Carbon metabolism+ko00630//Glyoxylate and dicarboxylate metabolism	XM_003569621.3 PREDICTED: Brachypodium distachyon glycine dehydrogenase (decarboxylating) 2, mitochondrial (LOC100845191), mRNA	glycine dehydrogenase (decarboxylating) 1, mitochondrial-like [Aegilops tauschii subsp. tauschii]	Glycine cleavage system P-protein	Glycine dehydrogenase (decarboxylating), mitochondrial OS=Solanum tuberosum GN=GDCSP PE=2 SV=1	GO:0006546//glycine catabolic process;GO:0005739//mitochondrion;GO:0004375//glycine dehydrogenase (decarboxylating) activity
CL1834.Contig38_All	2.44333	0.663333	0.75	2.60333	-1.87653	-1.70376	0.0945043	0.172772	1.97104	1.79826	K00281//glycine dehydrogenase [EC:1.4.4.2]+ko01100//Metabolic pathways+ko01110//Biosynthesis of secondary metabolites+ko00260//Glycine, serine and threonine metabolism+ko01200//Carbon metabolism+ko00630//Glyoxylate and dicarboxylate metabolism	XM_003569621.3 PREDICTED: Brachypodium distachyon glycine dehydrogenase (decarboxylating) 2, mitochondrial (LOC100845191), mRNA	unnamed protein product [Triticum aestivum]	Glycine cleavage system P-protein	Glycine dehydrogenase (decarboxylating), mitochondrial OS=Solanum tuberosum GN=GDCSP PE=2 SV=1	GO:0006546//glycine catabolic process;GO:0005739//mitochondrion;GO:0004375//glycine dehydrogenase (decarboxylating) activity
AMTase
CL14900.Contig8_All	47.24	47.01	79.11	114.67	-0.00477537	0.749195	1.2849	0.75397	1.28968	0.535707	K00605//aminomethyltransferase [EC:2.1.2.10]+ko00670//One carbon pool by folate+ko01100//Metabolic pathways+ko01110//Biosynthesis of secondary metabolites+ko00260//Glycine, serine and threonine metabolism+ko01200//Carbon metabolism+ko00630//Glyoxylate and dicarboxylate metabolism	FP101395.1 Phyllostachys edulis cDNA clone: bphyem206l06, full insert sequence	PREDICTED: aminomethyltransferase, mitochondrial [Oryza brachyantha]	Aminomethyltransferase folate-binding domain	Aminomethyltransferase, mitochondrial OS=Solanum tuberosum GN=GDCST PE=2 SV=1
DIDase
CL6746.Contig1_All	12.5333	14.6867	12.4833	12.0467	0.229515	0.00112012	-0.0542603	-0.228395	-0.283775	-0.0553804	K00382//dihydrolipoamide dehydrogenase [EC:1.8.1.4]+ko00010//Glycolysis / Gluconeogenesis+ko00020//Citrate cycle (TCA cycle)+ko00280//Valine, leucine and isoleucine degradation+ko00640//Propanoate metabolism+ko01100//Metabolic pathways+ko01110//Biosynthesis of secondary metabolites+ko00260//Glycine, serine and threonine metabolism+ko00620//Pyruvate metabolism+ko01200//Carbon metabolism+ko00630//G…	XM_003567596.3 PREDICTED: Brachypodium distachyon dihydrolipoyl dehydrogenase 1, mitochondrial-like (LOC100823154), mRNA	dihydrolipoyl dehydrogenase 1, mitochondrial-like [Aegilops tauschii subsp. tauschii]	Pyridine nucleotide-disulphide oxidoreductase	Dihydrolipoyl dehydrogenase 1, mitochondrial OS=Arabidopsis thaliana GN=LPD1 PE=1 SV=2	GO:0009055//electron transfer activity;GO:0004148//dihydrolipoyl dehydrogenase activity;GO:0005623//cell;GO:0050660//flavin adenine dinucleotide binding;GO:0045454//cell redox homeostasis
CL12727.Contig14_All	7.04333	11.8167	8.75667	2.13	0.747662	0.325014	-1.7213	-0.422648	-2.46896	-2.04631	K00382//dihydrolipoamide dehydrogenase [EC:1.8.1.4]+ko00010//Glycolysis / Gluconeogenesis+ko00020//Citrate cycle (TCA cycle)+ko00280//Valine, leucine and isoleucine degradation+ko00640//Propanoate metabolism+ko01100//Metabolic pathways+ko01110//Biosynthesis of secondary metabolites+ko00260//Glycine, serine and threonine metabolism+ko00620//Pyruvate metabolism+ko01200//Carbon metabolism+ko00630//G…	XM_003567608.3 PREDICTED: Brachypodium distachyon dihydrolipoyl dehydrogenase 1, chloroplastic-like (LOC100826755), mRNA	PREDICTED: dihydrolipoyl dehydrogenase 1, chloroplastic-like [Brachypodium distachyon] >KQK04233.1 hypothetical protein BRADI_2g12520 [Brachypodium distachyon]	Pyridine nucleotide-disulphide oxidoreductase	Dihydrolipoyl dehydrogenase 1, chloroplastic OS=Arabidopsis thaliana GN=LPD1 PE=2 SV=1	GO:0009055//electron transfer activity;GO:0004148//dihydrolipoyl dehydrogenase activity;GO:0005623//cell;GO:0050660//flavin adenine dinucleotide binding;GO:0016668//oxidoreductase activity, acting on a sulfur group of donors, NAD(P) as acceptor;GO:0045454//cell redox homeostasis
CL12727.Contig2_All	0.156667	0.173333	0.153333	0.166667	0.171807	0.00535328	0.0850484	-0.166454	-0.086759	0.0796951	K00382//dihydrolipoamide dehydrogenase [EC:1.8.1.4]+ko00010//Glycolysis / Gluconeogenesis+ko00020//Citrate cycle (TCA cycle)+ko00280//Valine, leucine and isoleucine degradation+ko00640//Propanoate metabolism+ko01100//Metabolic pathways+ko01110//Biosynthesis of secondary metabolites+ko00260//Glycine, serine and threonine metabolism+ko00620//Pyruvate metabolism+ko01200//Carbon metabolism+ko00630//G…	XM_003568839.3 PREDICTED: Brachypodium distachyon dihydrolipoyl dehydrogenase 2, chloroplastic-like (LOC100837564), transcript variant X2, mRNA	hypothetical protein PAHAL_C01428 [Panicum hallii]		Dihydrolipoyl dehydrogenase 1, chloroplastic OS=Arabidopsis thaliana GN=LPD1 PE=2 SV=1	GO:0009055//electron transfer activity;GO:0004148//dihydrolipoyl dehydrogenase activity;GO:0005623//cell;GO:0050660//flavin adenine dinucleotide binding;GO:0045454//cell redox homeostasis
CL16906.Contig2_All	5.40667	7.38667	4.45	3.77	0.451814	-0.271606	-0.514563	-0.723421	-0.966377	-0.242956	K00382//dihydrolipoamide dehydrogenase [EC:1.8.1.4]+ko00010//Glycolysis / Gluconeogenesis+ko00020//Citrate cycle (TCA cycle)+ko00280//Valine, leucine and isoleucine degradation+ko00640//Propanoate metabolism+ko01100//Metabolic pathways+ko01110//Biosynthesis of secondary metabolites+ko00260//Glycine, serine and threonine metabolism+ko00620//Pyruvate metabolism+ko01200//Carbon metabolism+ko00630//G…	XM_020329661.1 PREDICTED: Aegilops tauschii subsp. tauschii leghemoglobin reductase-like (LOC109770946), mRNA	PREDICTED: dihydrolipoyl dehydrogenase, mitochondrial [Brachypodium distachyon] >KQK07356.1 hypothetical protein BRADI_2g34770 [Brachypodium distachyon]	Pyridine nucleotide-disulphide oxidoreductase	Leghemoglobin reductase OS=Vigna unguiculata GN=FLBR PE=1 SV=1	GO:0009055//electron transfer activity;GO:0004148//dihydrolipoyl dehydrogenase activity;GO:0005623//cell;GO:0050660//flavin adenine dinucleotide binding;GO:0045454//cell redox homeostasis
CL12727.Contig15_All	8.66	13.6333	17.8	6.40667	0.659419	1.04952	-0.422168	0.390099	-1.08159	-1.47169	K00382//dihydrolipoamide dehydrogenase [EC:1.8.1.4]+ko00010//Glycolysis / Gluconeogenesis+ko00020//Citrate cycle (TCA cycle)+ko00280//Valine, leucine and isoleucine degradation+ko00640//Propanoate metabolism+ko01100//Metabolic pathways+ko01110//Biosynthesis of secondary metabolites+ko00260//Glycine, serine and threonine metabolism+ko00620//Pyruvate metabolism+ko01200//Carbon metabolism+ko00630//G…	XM_003567608.3 PREDICTED: Brachypodium distachyon dihydrolipoyl dehydrogenase 1, chloroplastic-like (LOC100826755), mRNA	hypothetical protein PAHAL_C01428 [Panicum hallii]	Pyridine nucleotide-disulphide oxidoreductase, dimerisation domain	Dihydrolipoyl dehydrogenase 1, chloroplastic OS=Arabidopsis thaliana GN=LPD1 PE=2 SV=1	GO:0009055//electron transfer activity;GO:0004148//dihydrolipoyl dehydrogenase activity;GO:0005623//cell;GO:0050660//flavin adenine dinucleotide binding;GO:0045454//cell redox homeostasis
CL6746.Contig3_All	40.9567	42.3867	28.8733	27.59	0.0510252	-0.490139	-0.56545	-0.541164	-0.616475	-0.075311	K00382//dihydrolipoamide dehydrogenase [EC:1.8.1.4]+ko00010//Glycolysis / Gluconeogenesis+ko00020//Citrate cycle (TCA cycle)+ko00280//Valine, leucine and isoleucine degradation+ko00640//Propanoate metabolism+ko01100//Metabolic pathways+ko01110//Biosynthesis of secondary metabolites+ko00260//Glycine, serine and threonine metabolism+ko00620//Pyruvate metabolism+ko01200//Carbon metabolism+ko00630//G…	XM_003567596.3 PREDICTED: Brachypodium distachyon dihydrolipoyl dehydrogenase 1, mitochondrial-like (LOC100823154), mRNA	dihydrolipoyl dehydrogenase 1, mitochondrial-like [Aegilops tauschii subsp. tauschii]	Pyridine nucleotide-disulphide oxidoreductase	Dihydrolipoyl dehydrogenase 1, mitochondrial OS=Arabidopsis thaliana GN=LPD1 PE=1 SV=2	GO:0009055//electron transfer activity;GO:0004148//dihydrolipoyl dehydrogenase activity;GO:0005623//cell;GO:0050660//flavin adenine dinucleotide binding;GO:0045454//cell redox homeostasis
CL12727.Contig12_All	0.673333	1.25667	1.30667	0.123333	0.895721	0.956849	-2.45903	0.0611276	-3.35475	-3.41588	K00382//dihydrolipoamide dehydrogenase [EC:1.8.1.4]+ko00010//Glycolysis / Gluconeogenesis+ko00020//Citrate cycle (TCA cycle)+ko00280//Valine, leucine and isoleucine degradation+ko00640//Propanoate metabolism+ko01100//Metabolic pathways+ko01110//Biosynthesis of secondary metabolites+ko00260//Glycine, serine and threonine metabolism+ko00620//Pyruvate metabolism+ko01200//Carbon metabolism+ko00630//G…	XM_003567608.3 PREDICTED: Brachypodium distachyon dihydrolipoyl dehydrogenase 1, chloroplastic-like (LOC100826755), mRNA	PREDICTED: dihydrolipoyl dehydrogenase 1, chloroplastic-like [Brachypodium distachyon] >KQK04233.1 hypothetical protein BRADI_2g12520 [Brachypodium distachyon]	Pyridine nucleotide-disulphide oxidoreductase	Dihydrolipoyl dehydrogenase 1, chloroplastic OS=Arabidopsis thaliana GN=LPD1 PE=2 SV=1	GO:0009055//electron transfer activity;GO:0004148//dihydrolipoyl dehydrogenase activity;GO:0005623//cell;GO:0050660//flavin adenine dinucleotide binding;GO:0016668//oxidoreductase activity, acting on a sulfur group of donors, NAD(P) as acceptor;GO:0045454//cell redox homeostasis
CL16906.Contig3_All	3.13	2.79667	3.77	2.99	-0.160471	0.274188	-0.0575595	0.434659	0.102911	-0.331748	K00382//dihydrolipoamide dehydrogenase [EC:1.8.1.4]+ko00010//Glycolysis / Gluconeogenesis+ko00020//Citrate cycle (TCA cycle)+ko00280//Valine, leucine and isoleucine degradation+ko00640//Propanoate metabolism+ko01100//Metabolic pathways+ko01110//Biosynthesis of secondary metabolites+ko00260//Glycine, serine and threonine metabolism+ko00620//Pyruvate metabolism+ko01200//Carbon metabolism+ko00630//G…	XM_020329661.1 PREDICTED: Aegilops tauschii subsp. tauschii leghemoglobin reductase-like (LOC109770946), mRNA	PREDICTED: dihydrolipoyl dehydrogenase, mitochondrial [Brachypodium distachyon] >KQK07356.1 hypothetical protein BRADI_2g34770 [Brachypodium distachyon]	Pyridine nucleotide-disulphide oxidoreductase	Leghemoglobin reductase OS=Vigna unguiculata GN=FLBR PE=1 SV=1	GO:0009055//electron transfer activity;GO:0004148//dihydrolipoyl dehydrogenase activity;GO:0005623//cell;GO:0050660//flavin adenine dinucleotide binding;GO:0045454//cell redox homeostasis
CL6746.Contig5_All	1.18	1.46333	3.04333	2.87	0.311346	1.36514	1.28232	1.05379	0.970979	-0.0828135	K00382//dihydrolipoamide dehydrogenase [EC:1.8.1.4]+ko00010//Glycolysis / Gluconeogenesis+ko00020//Citrate cycle (TCA cycle)+ko00280//Valine, leucine and isoleucine degradation+ko00640//Propanoate metabolism+ko01100//Metabolic pathways+ko01110//Biosynthesis of secondary metabolites+ko00260//Glycine, serine and threonine metabolism+ko00620//Pyruvate metabolism+ko01200//Carbon metabolism+ko00630//G…	XM_003567596.3 PREDICTED: Brachypodium distachyon dihydrolipoyl dehydrogenase 1, mitochondrial-like (LOC100823154), mRNA	dihydrolipoyl dehydrogenase 1, mitochondrial-like [Aegilops tauschii subsp. tauschii]	Pyridine nucleotide-disulphide oxidoreductase	Dihydrolipoyl dehydrogenase 1, mitochondrial OS=Arabidopsis thaliana GN=LPD1 PE=1 SV=2	GO:0009055//electron transfer activity;GO:0004148//dihydrolipoyl dehydrogenase activity;GO:0005623//cell;GO:0050660//flavin adenine dinucleotide binding;GO:0045454//cell redox homeostasis
CL12727.Contig11_All	0.286667	0.983333	0.76	0.213333	1.78029	1.41558	-0.417942	-0.364712	-2.19823	-1.83352	K00382//dihydrolipoamide dehydrogenase [EC:1.8.1.4]+ko00010//Glycolysis / Gluconeogenesis+ko00020//Citrate cycle (TCA cycle)+ko00280//Valine, leucine and isoleucine degradation+ko00640//Propanoate metabolism+ko01100//Metabolic pathways+ko01110//Biosynthesis of secondary metabolites+ko00260//Glycine, serine and threonine metabolism+ko00620//Pyruvate metabolism+ko01200//Carbon metabolism+ko00630//G…	XM_003568839.3 PREDICTED: Brachypodium distachyon dihydrolipoyl dehydrogenase 2, chloroplastic-like (LOC100837564), transcript variant X2, mRNA	PREDICTED: dihydrolipoyl dehydrogenase 2, chloroplastic-like isoform X2 [Brachypodium distachyon] >KQK07384.1 hypothetical protein BRADI_2g34970 [Brachypodium distachyon]	Pyridine nucleotide-disulphide oxidoreductase, dimerisation domain	Dihydrolipoyl dehydrogenase 1, chloroplastic OS=Arabidopsis thaliana GN=LPD1 PE=2 SV=1	GO:0009055//electron transfer activity;GO:0004148//dihydrolipoyl dehydrogenase activity;GO:0005623//cell;GO:0050660//flavin adenine dinucleotide binding;GO:0045454//cell redox homeostasis
CL12727.Contig9_All	0.363333	0.56	0.26	0.376667	0.618276	-0.497434	0.05007	-1.11571	-0.568206	0.547504	K00382//dihydrolipoamide dehydrogenase [EC:1.8.1.4]+ko00010//Glycolysis / Gluconeogenesis+ko00020//Citrate cycle (TCA cycle)+ko00280//Valine, leucine and isoleucine degradation+ko00640//Propanoate metabolism+ko01100//Metabolic pathways+ko01110//Biosynthesis of secondary metabolites+ko00260//Glycine, serine and threonine metabolism+ko00620//Pyruvate metabolism+ko01200//Carbon metabolism+ko00630//G…	XM_003568839.3 PREDICTED: Brachypodium distachyon dihydrolipoyl dehydrogenase 2, chloroplastic-like (LOC100837564), transcript variant X2, mRNA	hypothetical protein BRADI_2g34970 [Brachypodium distachyon]	Pyridine nucleotide-disulphide oxidoreductase	Dihydrolipoyl dehydrogenase 1, chloroplastic OS=Arabidopsis thaliana GN=LPD1 PE=2 SV=1	GO:0009055//electron transfer activity;GO:0004148//dihydrolipoyl dehydrogenase activity;GO:0005623//cell;GO:0050660//flavin adenine dinucleotide binding;GO:0045454//cell redox homeostasis
CL16906.Contig1_All	6.01333	7.34	4.29667	3.36333	0.289309	-0.474969	-0.833588	-0.764278	-1.1229	-0.358619	K00382//dihydrolipoamide dehydrogenase [EC:1.8.1.4]+ko00010//Glycolysis / Gluconeogenesis+ko00020//Citrate cycle (TCA cycle)+ko00280//Valine, leucine and isoleucine degradation+ko00640//Propanoate metabolism+ko01100//Metabolic pathways+ko01110//Biosynthesis of secondary metabolites+ko00260//Glycine, serine and threonine metabolism+ko00620//Pyruvate metabolism+ko01200//Carbon metabolism+ko00630//G…	XM_003568813.3 PREDICTED: Brachypodium distachyon dihydrolipoyl dehydrogenase, mitochondrial (LOC100830109), mRNA	leghemoglobin reductase-like [Aegilops tauschii subsp. tauschii]	Pyridine nucleotide-disulphide oxidoreductase	Dihydrolipoyl dehydrogenase 1, mitochondrial OS=Arabidopsis thaliana GN=LPD1 PE=1 SV=2	GO:0009055//electron transfer activity;GO:0004148//dihydrolipoyl dehydrogenase activity;GO:0005623//cell;GO:0050660//flavin adenine dinucleotide binding;GO:0045454//cell redox homeostasis
CL6746.Contig2_All	20.8967	19.02	27.45	32.21	-0.132977	0.398626	0.627393	0.531603	0.76037	0.228768	K00382//dihydrolipoamide dehydrogenase [EC:1.8.1.4]+ko00010//Glycolysis / Gluconeogenesis+ko00020//Citrate cycle (TCA cycle)+ko00280//Valine, leucine and isoleucine degradation+ko00640//Propanoate metabolism+ko01100//Metabolic pathways+ko01110//Biosynthesis of secondary metabolites+ko00260//Glycine, serine and threonine metabolism+ko00620//Pyruvate metabolism+ko01200//Carbon metabolism+ko00630//G…	XM_003567596.3 PREDICTED: Brachypodium distachyon dihydrolipoyl dehydrogenase 1, mitochondrial-like (LOC100823154), mRNA	dihydrolipoyl dehydrogenase 1, mitochondrial-like [Aegilops tauschii subsp. tauschii]	Pyridine nucleotide-disulphide oxidoreductase	Dihydrolipoyl dehydrogenase 1, mitochondrial OS=Arabidopsis thaliana GN=LPD1 PE=1 SV=2	GO:0009055//electron transfer activity;GO:0004148//dihydrolipoyl dehydrogenase activity;GO:0005623//cell;GO:0050660//flavin adenine dinucleotide binding;GO:0045454//cell redox homeostasis
HPRase
CL738.Contig23_All	0.223333	0.186667	0.3	0.496667	-0.268952	0.436178	1.14943	0.70513	1.41838	0.71325	K15893//hydroxypyruvate reductase 1+ko01100//Metabolic pathways+ko01110//Biosynthesis of secondary metabolites+ko00260//Glycine, serine and threonine metabolism+ko01200//Carbon metabolism+ko00630//Glyoxylate and dicarboxylate metabolism	XM_020326668.1 PREDICTED: Aegilops tauschii subsp. tauschii glycerate dehydrogenase (LOC109767931), mRNA	PREDICTED: glycerate dehydrogenase [Oryza sativa Japonica Group] >BAD07805.1 putative hydroxypyruvate reductase [Oryza sativa Japonica Group] >BAD08188.1 putative hydroxypyruvate reductase [Oryza sativa Japonica Group] >BAF07503.1 Os02g0101500 [Oryza sativa Japonica Group] >BAG90513.1 unnamed protein product [Oryza sativa Japonica Group] >EEE56124.1 hypothetical protein OsJ_04992 [Oryza sativa Ja…	D-isomer specific 2-hydroxyacid dehydrogenase, NAD binding domain	Glycerate dehydrogenase HPR, peroxisomal OS=Arabidopsis thaliana GN=HPR PE=1 SV=1	GO:0016616//oxidoreductase activity, acting on the CH-OH group of donors, NAD or NADP as acceptor;GO:0005829//cytosol;GO:0051287//NAD binding;GO:0016618//hydroxypyruvate reductase activity;GO:0030267//glyoxylate reductase (NADP) activity
CL9071.Contig1_All	34.3567	34.2367	22.4933	46.78	-0.00325681	-0.599571	0.453662	-0.596314	0.456919	1.05323	K15919//hydroxypyruvate reductase 2+ko01100//Metabolic pathways+ko01110//Biosynthesis of secondary metabolites+ko00260//Glycine, serine and threonine metabolism+ko01200//Carbon metabolism+ko00630//Glyoxylate and dicarboxylate metabolism	XM_003565861.3 PREDICTED: Brachypodium distachyon hydroxyphenylpyruvate reductase (LOC100831724), transcript variant X1, mRNA	predicted protein [Hordeum vulgare subsp. vulgare]	D-isomer specific 2-hydroxyacid dehydrogenase, NAD binding domain	Hydroxyphenylpyruvate reductase OS=Plectranthus scutellarioides GN=HPPR PE=1 SV=2
CL738.Contig31_All	9.56	10.0133	18.7733	12.8167	0.0679777	0.978564	0.428215	0.910586	0.360237	-0.550349	K15893//hydroxypyruvate reductase 1+ko01100//Metabolic pathways+ko01110//Biosynthesis of secondary metabolites+ko00260//Glycine, serine and threonine metabolism+ko01200//Carbon metabolism+ko00630//Glyoxylate and dicarboxylate metabolism	XM_003573338.3 PREDICTED: Brachypodium distachyon glycerate dehydrogenase (LOC100838606), mRNA	hypothetical protein OsI_05455 [Oryza sativa Indica Group]	D-isomer specific 2-hydroxyacid dehydrogenase, NAD binding domain	Glycerate dehydrogenase HPR, peroxisomal OS=Arabidopsis thaliana GN=HPR PE=1 SV=1	GO:0016616//oxidoreductase activity, acting on the CH-OH group of donors, NAD or NADP as acceptor;GO:0005829//cytosol;GO:0051287//NAD binding;GO:0016618//hydroxypyruvate reductase activity;GO:0030267//glyoxylate reductase (NADP) activity
CL4816.Contig2_All	1.10667	1.14667	1.49667	1.21	0.0494309	0.45007	0.13427	0.400639	0.0848391	-0.3158	K15919//hydroxypyruvate reductase 2+ko01100//Metabolic pathways+ko01110//Biosynthesis of secondary metabolites+ko00260//Glycine, serine and threonine metabolism+ko01200//Carbon metabolism+ko00630//Glyoxylate and dicarboxylate metabolism;K13172//serine/arginine repetitive matrix protein 2	XM_003579708.3 PREDICTED: Brachypodium distachyon uncharacterized LOC100828851 (LOC100828851), mRNA	hypothetical protein BRADI_5g10200 [Brachypodium distachyon]	Late embryogenesis abundant protein		GO:0016021//integral component of membrane
CL738.Contig1_All	97.15	79.5167	144.23	233.407	-0.282231	0.579914	1.27691	0.862145	1.55914	0.696991	K15893//hydroxypyruvate reductase 1+ko01100//Metabolic pathways+ko01110//Biosynthesis of secondary metabolites+ko00260//Glycine, serine and threonine metabolism+ko01200//Carbon metabolism+ko00630//Glyoxylate and dicarboxylate metabolism	XM_003573338.3 PREDICTED: Brachypodium distachyon glycerate dehydrogenase (LOC100838606), mRNA	PREDICTED: glycerate dehydrogenase [Brachypodium distachyon] >KQJ92733.1 hypothetical protein BRADI_3g00330 [Brachypodium distachyon]		Glycerate dehydrogenase HPR, peroxisomal OS=Arabidopsis thaliana GN=HPR PE=1 SV=1	GO:0016616//oxidoreductase activity, acting on the CH-OH group of donors, NAD or NADP as acceptor;GO:0005829//cytosol;GO:0051287//NAD binding;GO:0016618//hydroxypyruvate reductase activity;GO:0030267//glyoxylate reductase (NADP) activity
CL738.Contig6_All	1.93	1.2	5.85	3.54	-0.683137	1.6126	0.879967	2.29573	1.5631	-0.732629	K15893//hydroxypyruvate reductase 1+ko01100//Metabolic pathways+ko01110//Biosynthesis of secondary metabolites+ko00260//Glycine, serine and threonine metabolism+ko01200//Carbon metabolism+ko00630//Glyoxylate and dicarboxylate metabolism	XM_021459976.1 PREDICTED: Sorghum bicolor glycerate dehydrogenase (LOC110434935), transcript variant X2, mRNA	PREDICTED: glycerate dehydrogenase [Oryza brachyantha]	D-isomer specific 2-hydroxyacid dehydrogenase, NAD binding domain	Glycerate dehydrogenase HPR, peroxisomal OS=Arabidopsis thaliana GN=HPR PE=1 SV=1	GO:0016616//oxidoreductase activity, acting on the CH-OH group of donors, NAD or NADP as acceptor;GO:0005829//cytosol;GO:0051287//NAD binding;GO:0016618//hydroxypyruvate reductase activity;GO:0030267//glyoxylate reductase (NADP) activity
CL738.Contig17_All	60.1533	25.6467	26.9867	37.4933	-1.22715	-1.14194	-0.676855	0.0852063	0.550296	0.465089	K15893//hydroxypyruvate reductase 1+ko01100//Metabolic pathways+ko01110//Biosynthesis of secondary metabolites+ko00260//Glycine, serine and threonine metabolism+ko01200//Carbon metabolism+ko00630//Glyoxylate and dicarboxylate metabolism	XM_021459976.1 PREDICTED: Sorghum bicolor glycerate dehydrogenase (LOC110434935), transcript variant X2, mRNA	PREDICTED: glycerate dehydrogenase [Oryza sativa Japonica Group] >BAD07805.1 putative hydroxypyruvate reductase [Oryza sativa Japonica Group] >BAD08188.1 putative hydroxypyruvate reductase [Oryza sativa Japonica Group] >BAF07503.1 Os02g0101500 [Oryza sativa Japonica Group] >BAG90513.1 unnamed protein product [Oryza sativa Japonica Group] >EEE56124.1 hypothetical protein OsJ_04992 [Oryza sativa Ja…	D-isomer specific 2-hydroxyacid dehydrogenase, NAD binding domain	Glycerate dehydrogenase HPR, peroxisomal OS=Arabidopsis thaliana GN=HPR PE=1 SV=1	GO:0016616//oxidoreductase activity, acting on the CH-OH group of donors, NAD or NADP as acceptor;GO:0005829//cytosol;GO:0051287//NAD binding;GO:0016618//hydroxypyruvate reductase activity;GO:0030267//glyoxylate reductase (NADP) activity
CL738.Contig47_All	0.336667	0.16	0.956667	0.933333	-1.05727	1.51496	1.47722	2.57222	2.53449	-0.037732	K15893//hydroxypyruvate reductase 1+ko01100//Metabolic pathways+ko01110//Biosynthesis of secondary metabolites+ko00260//Glycine, serine and threonine metabolism+ko01200//Carbon metabolism+ko00630//Glyoxylate and dicarboxylate metabolism	XM_003573338.3 PREDICTED: Brachypodium distachyon glycerate dehydrogenase (LOC100838606), mRNA	PREDICTED: glycerate dehydrogenase [Brachypodium distachyon] >KQJ92733.1 hypothetical protein BRADI_3g00330 [Brachypodium distachyon]	D-isomer specific 2-hydroxyacid dehydrogenase, NAD binding domain	Glycerate dehydrogenase OS=Cucumis sativus GN=HPR-A PE=2 SV=1	GO:0016616//oxidoreductase activity, acting on the CH-OH group of donors, NAD or NADP as acceptor;GO:0005829//cytosol;GO:0051287//NAD binding;GO:0016618//hydroxypyruvate reductase activity;GO:0030267//glyoxylate reductase (NADP) activity
CL7746.Contig3_All	0.81	1.34	1.07333	0.496667	0.733703	0.421339	-0.691164	-0.312364	-1.42487	-1.1125	K15919//hydroxypyruvate reductase 2+ko01100//Metabolic pathways+ko01110//Biosynthesis of secondary metabolites+ko00260//Glycine, serine and threonine metabolism+ko01200//Carbon metabolism+ko00630//Glyoxylate and dicarboxylate metabolism		Glyoxylate/hydroxypyruvate reductase HPR3 [Dichanthelium oligosanthes]	D-isomer specific 2-hydroxyacid dehydrogenase, catalytic domain	Glyoxylate/hydroxypyruvate reductase HPR3 OS=Arabidopsis thaliana GN=HPR3 PE=2 SV=1
CL738.Contig27_All	181.457	78.9033	81.3033	94.0067	-1.19844	-1.14207	-0.943029	0.0563658	0.25541	0.199045	K15893//hydroxypyruvate reductase 1+ko01100//Metabolic pathways+ko01110//Biosynthesis of secondary metabolites+ko00260//Glycine, serine and threonine metabolism+ko01200//Carbon metabolism+ko00630//Glyoxylate and dicarboxylate metabolism	XM_003573338.3 PREDICTED: Brachypodium distachyon glycerate dehydrogenase (LOC100838606), mRNA	PREDICTED: glycerate dehydrogenase [Brachypodium distachyon] >KQJ92733.1 hypothetical protein BRADI_3g00330 [Brachypodium distachyon]	D-isomer specific 2-hydroxyacid dehydrogenase, NAD binding domain	Glycerate dehydrogenase HPR, peroxisomal OS=Arabidopsis thaliana GN=HPR PE=1 SV=1	GO:0016616//oxidoreductase activity, acting on the CH-OH group of donors, NAD or NADP as acceptor;GO:0005829//cytosol;GO:0051287//NAD binding;GO:0016618//hydroxypyruvate reductase activity;GO:0030267//glyoxylate reductase (NADP) activity
CL4816.Contig1_All	0.81	1.33333	1.32667	0.583333	0.718973	0.723961	-0.465382	0.00498774	-1.18435	-1.18934	K15919//hydroxypyruvate reductase 2+ko01100//Metabolic pathways+ko01110//Biosynthesis of secondary metabolites+ko00260//Glycine, serine and threonine metabolism+ko01200//Carbon metabolism+ko00630//Glyoxylate and dicarboxylate metabolism;K13172//serine/arginine repetitive matrix protein 2	XM_020299544.1 PREDICTED: Aegilops tauschii subsp. tauschii uncharacterized LOC109740484 (LOC109740484), mRNA	predicted protein [Hordeum vulgare subsp. vulgare]	Late embryogenesis abundant protein		GO:0016021//integral component of membrane
CL738.Contig33_All	0.946667	0.763333	1.59333	1.89	-0.313503	0.751528	1.00097	1.06503	1.31448	0.249444	K15893//hydroxypyruvate reductase 1+ko01100//Metabolic pathways+ko01110//Biosynthesis of secondary metabolites+ko00260//Glycine, serine and threonine metabolism+ko01200//Carbon metabolism+ko00630//Glyoxylate and dicarboxylate metabolism	XM_006646691.2 PREDICTED: Oryza brachyantha glycerate dehydrogenase (LOC102721512), mRNA	hypothetical protein OsI_05455 [Oryza sativa Indica Group]	D-isomer specific 2-hydroxyacid dehydrogenase, NAD binding domain	Glycerate dehydrogenase HPR, peroxisomal OS=Arabidopsis thaliana GN=HPR PE=1 SV=1	GO:0016616//oxidoreductase activity, acting on the CH-OH group of donors, NAD or NADP as acceptor;GO:0005829//cytosol;GO:0051287//NAD binding;GO:0016618//hydroxypyruvate reductase activity;GO:0030267//glyoxylate reductase (NADP) activity
Unigene13507_All	2.76333	4.17667	4.73667	2.12667	0.599202	0.787877	-0.366462	0.188675	-0.965664	-1.15434	K15919//hydroxypyruvate reductase 2+ko01100//Metabolic pathways+ko01110//Biosynthesis of secondary metabolites+ko00260//Glycine, serine and threonine metabolism+ko01200//Carbon metabolism+ko00630//Glyoxylate and dicarboxylate metabolism	XM_003580937.3 PREDICTED: Brachypodium distachyon glyoxylate/hydroxypyruvate reductase HPR3-like (LOC100833233), mRNA	PREDICTED: glyoxylate/hydroxypyruvate reductase HPR3-like [Brachypodium distachyon]	D-isomer specific 2-hydroxyacid dehydrogenase, NAD binding domain	Glyoxylate/hydroxypyruvate reductase HPR3 OS=Arabidopsis thaliana GN=HPR3 PE=2 SV=1	GO:0005829//cytosol;GO:0051287//NAD binding;GO:0016618//hydroxypyruvate reductase activity;GO:0030267//glyoxylate reductase (NADP) activity
Unigene54537_All	3.29	7.10333	5.18667	7.20667	1.11353	0.661369	1.14006	-0.452161	0.0265319	0.478693	K15919//hydroxypyruvate reductase 2+ko01100//Metabolic pathways+ko01110//Biosynthesis of secondary metabolites+ko00260//Glycine, serine and threonine metabolism+ko01200//Carbon metabolism+ko00630//Glyoxylate and dicarboxylate metabolism	XM_020298036.1 PREDICTED: Aegilops tauschii subsp. tauschii hydroxyphenylpyruvate reductase (LOC109738946), transcript variant X2, mRNA	PREDICTED: hydroxyphenylpyruvate reductase isoform X2 [Brachypodium distachyon] >KQK03404.1 hypothetical protein BRADI_2g07650 [Brachypodium distachyon]	D-isomer specific 2-hydroxyacid dehydrogenase, NAD binding domain	Hydroxyphenylpyruvate reductase OS=Plectranthus scutellarioides GN=HPPR PE=1 SV=2	GO:0009854//oxidative photosynthetic carbon pathway;GO:0005829//cytosol;GO:0051287//NAD binding;GO:0016618//hydroxypyruvate reductase activity;GO:0030267//glyoxylate reductase (NADP) activity
CL7746.Contig4_All	2.07333	3.64333	3.42333	3.07667	0.81737	0.732829	0.576477	-0.0845418	-0.240893	-0.156352	K15919//hydroxypyruvate reductase 2+ko01100//Metabolic pathways+ko01110//Biosynthesis of secondary metabolites+ko00260//Glycine, serine and threonine metabolism+ko01200//Carbon metabolism+ko00630//Glyoxylate and dicarboxylate metabolism	XM_015780671.1 PREDICTED: Oryza sativa Japonica Group glyoxylate/hydroxypyruvate reductase HPR3 (LOC4334914), mRNA	B0616E02-H0507E05.10 [Oryza sativa]	D-isomer specific 2-hydroxyacid dehydrogenase, NAD binding domain	Glyoxylate/hydroxypyruvate reductase HPR3 OS=Arabidopsis thaliana GN=HPR3 PE=2 SV=1	GO:0005829//cytosol;GO:0051287//NAD binding;GO:0016618//hydroxypyruvate reductase activity;GO:0030267//glyoxylate reductase (NADP) activity
CL4850.Contig2_All	1.83	0.493333	0.77	1.36	-1.89827	-1.23569	-0.421064	0.662578	1.47721	0.81463	K15919//hydroxypyruvate reductase 2+ko01100//Metabolic pathways+ko01110//Biosynthesis of secondary metabolites+ko00260//Glycine, serine and threonine metabolism+ko01200//Carbon metabolism+ko00630//Glyoxylate and dicarboxylate metabolism	XM_020298036.1 PREDICTED: Aegilops tauschii subsp. tauschii hydroxyphenylpyruvate reductase (LOC109738946), transcript variant X2, mRNA	PREDICTED: hydroxyphenylpyruvate reductase isoform X2 [Brachypodium distachyon] >KQK03404.1 hypothetical protein BRADI_2g07650 [Brachypodium distachyon]		Hydroxyphenylpyruvate reductase OS=Plectranthus scutellarioides GN=HPPR PE=1 SV=2	GO:0009854//oxidative photosynthetic carbon pathway;GO:0005829//cytosol;GO:0051287//NAD binding;GO:0016618//hydroxypyruvate reductase activity;GO:0030267//glyoxylate reductase (NADP) activity
CL738.Contig39_All	97.2833	52.1933	75.9667	105.647	-0.894779	-0.349258	0.123916	0.54552	1.01869	0.473174	K15893//hydroxypyruvate reductase 1+ko01100//Metabolic pathways+ko01110//Biosynthesis of secondary metabolites+ko00260//Glycine, serine and threonine metabolism+ko01200//Carbon metabolism+ko00630//Glyoxylate and dicarboxylate metabolism	XM_003573338.3 PREDICTED: Brachypodium distachyon glycerate dehydrogenase (LOC100838606), mRNA	PREDICTED: glycerate dehydrogenase [Oryza sativa Japonica Group] >BAD07805.1 putative hydroxypyruvate reductase [Oryza sativa Japonica Group] >BAD08188.1 putative hydroxypyruvate reductase [Oryza sativa Japonica Group] >BAF07503.1 Os02g0101500 [Oryza sativa Japonica Group] >BAG90513.1 unnamed protein product [Oryza sativa Japonica Group] >EEE56124.1 hypothetical protein OsJ_04992 [Oryza sativa Ja…	D-isomer specific 2-hydroxyacid dehydrogenase, NAD binding domain	Glycerate dehydrogenase HPR, peroxisomal OS=Arabidopsis thaliana GN=HPR PE=1 SV=1	GO:0016616//oxidoreductase activity, acting on the CH-OH group of donors, NAD or NADP as acceptor;GO:0005829//cytosol;GO:0051287//NAD binding;GO:0016618//hydroxypyruvate reductase activity;GO:0030267//glyoxylate reductase (NADP) activity
CL9071.Contig2_All	11.2667	3.46333	8.67	20.7267	-1.69964	-0.370154	0.887741	1.32949	2.58738	1.2579	K15919//hydroxypyruvate reductase 2+ko01100//Metabolic pathways+ko01110//Biosynthesis of secondary metabolites+ko00260//Glycine, serine and threonine metabolism+ko01200//Carbon metabolism+ko00630//Glyoxylate and dicarboxylate metabolism	FP099936.1 Phyllostachys edulis cDNA clone: bphyem101d15, full insert sequence	predicted protein [Hordeum vulgare subsp. vulgare]	D-isomer specific 2-hydroxyacid dehydrogenase, NAD binding domain	Hydroxyphenylpyruvate reductase OS=Plectranthus scutellarioides GN=HPPR PE=1 SV=2
Unigene35442_All	1.67333	4.01667	2.54333	0.88	1.26523	0.613571	-0.921861	-0.65166	-2.18709	-1.53543	K04496//C-terminal binding protein;K15919//hydroxypyruvate reductase 2+ko01100//Metabolic pathways+ko01110//Biosynthesis of secondary metabolites+ko00260//Glycine, serine and threonine metabolism+ko01200//Carbon metabolism+ko00630//Glyoxylate and dicarboxylate metabolism	XM_010231988.2 PREDICTED: Brachypodium distachyon C-terminal binding protein AN (LOC100837045), mRNA	PREDICTED: C-terminal binding protein AN [Brachypodium distachyon]	D-isomer specific 2-hydroxyacid dehydrogenase, NAD binding domain	C-terminal binding protein AN OS=Arabidopsis thaliana GN=AN PE=1 SV=1
CL2864.Contig2_All	9.91333	12.43	12.0767	9.28667	0.328155	0.296938	-0.0855782	-0.031217	-0.413734	-0.382516	K15919//hydroxypyruvate reductase 2+ko01100//Metabolic pathways+ko01110//Biosynthesis of secondary metabolites+ko00260//Glycine, serine and threonine metabolism+ko01200//Carbon metabolism+ko00630//Glyoxylate and dicarboxylate metabolism	XM_003580681.2 PREDICTED: Brachypodium distachyon glyoxylate/hydroxypyruvate reductase HPR3-like (LOC100845759), mRNA	PREDICTED: glyoxylate/hydroxypyruvate reductase HPR3-like [Brachypodium distachyon] >KQJ81662.1 hypothetical protein BRADI_5g02150 [Brachypodium distachyon]	D-isomer specific 2-hydroxyacid dehydrogenase, NAD binding domain	Glyoxylate/hydroxypyruvate reductase HPR3 OS=Arabidopsis thaliana GN=HPR3 PE=2 SV=1	GO:0005829//cytosol;GO:0051287//NAD binding;GO:0016618//hydroxypyruvate reductase activity;GO:0030267//glyoxylate reductase (NADP) activity
Unigene7471_All	3.33667	7.01333	4.93333	3.53667	1.07069	0.569202	0.0871949	-0.501484	-0.983491	-0.482007	K04496//C-terminal binding protein;K15919//hydroxypyruvate reductase 2+ko01100//Metabolic pathways+ko01110//Biosynthesis of secondary metabolites+ko00260//Glycine, serine and threonine metabolism+ko01200//Carbon metabolism+ko00630//Glyoxylate and dicarboxylate metabolism	XM_020329003.1 PREDICTED: Aegilops tauschii subsp. tauschii C-terminal binding protein AN-like (LOC109770298), mRNA	C-terminal binding protein AN-like [Aegilops tauschii subsp. tauschii]	D-isomer specific 2-hydroxyacid dehydrogenase, NAD binding domain	C-terminal binding protein AN OS=Arabidopsis thaliana GN=AN PE=1 SV=1	GO:0051287//NAD binding;GO:0055114//oxidation-reduction process
CL738.Contig35_All	48.5167	54.66	41.5133	35.3833	0.176632	-0.219346	-0.452019	-0.395977	-0.628651	-0.232673	K15893//hydroxypyruvate reductase 1+ko01100//Metabolic pathways+ko01110//Biosynthesis of secondary metabolites+ko00260//Glycine, serine and threonine metabolism+ko01200//Carbon metabolism+ko00630//Glyoxylate and dicarboxylate metabolism	XM_003573338.3 PREDICTED: Brachypodium distachyon glycerate dehydrogenase (LOC100838606), mRNA	PREDICTED: glycerate dehydrogenase [Oryza sativa Japonica Group] >BAD07805.1 putative hydroxypyruvate reductase [Oryza sativa Japonica Group] >BAD08188.1 putative hydroxypyruvate reductase [Oryza sativa Japonica Group] >BAF07503.1 Os02g0101500 [Oryza sativa Japonica Group] >BAG90513.1 unnamed protein product [Oryza sativa Japonica Group] >EEE56124.1 hypothetical protein OsJ_04992 [Oryza sativa Ja…	GDSL-like Lipase/Acylhydrolase	Glycerate dehydrogenase HPR, peroxisomal OS=Arabidopsis thaliana GN=HPR PE=1 SV=1	GO:0016616//oxidoreductase activity, acting on the CH-OH group of donors, NAD or NADP as acceptor;GO:0005829//cytosol;GO:0051287//NAD binding;GO:0016618//hydroxypyruvate reductase activity;GO:0030267//glyoxylate reductase (NADP) activity
GLYKase
CL16931.Contig6_All	0.0166667	0	0	0	-3.51123	-3.50136	-3.52719				K15918//D-glycerate 3-kinase [EC:2.7.1.31]+ko01100//Metabolic pathways+ko01110//Biosynthesis of secondary metabolites+ko00260//Glycine, serine and threonine metabolism+ko01200//Carbon metabolism+ko00630//Glyoxylate and dicarboxylate metabolism+ko00561//Glycerolipid metabolism	AK357229.1 Hordeum vulgare subsp. vulgare mRNA for predicted protein, complete cds, clone: NIASHv1048J18	PREDICTED: D-glycerate 3-kinase, chloroplastic [Brachypodium distachyon] >KQK09210.1 hypothetical protein BRADI_2g46690 [Brachypodium distachyon]		D-glycerate 3-kinase, chloroplastic OS=Arabidopsis thaliana GN=GLYK PE=1 SV=2	GO:0004849//uridine kinase activity;GO:0043097//pyrimidine nucleoside salvage;GO:0005829//cytosol;GO:0008887//glycerate kinase activity;GO:0009941//chloroplast envelope;GO:0009853//photorespiration;GO:0006206//pyrimidine nucleobase metabolic process;GO:0009570//chloroplast stroma
Unigene9478_All	58.7267	38.3	48.02	53.7733	-0.613586	-0.27643	-0.121113	0.337157	0.492473	0.155317	K15918//D-glycerate 3-kinase [EC:2.7.1.31]+ko01100//Metabolic pathways+ko01110//Biosynthesis of secondary metabolites+ko00260//Glycine, serine and threonine metabolism+ko01200//Carbon metabolism+ko00630//Glyoxylate and dicarboxylate metabolism+ko00561//Glycerolipid metabolism	AK357229.1 Hordeum vulgare subsp. vulgare mRNA for predicted protein, complete cds, clone: NIASHv1048J18	PREDICTED: D-glycerate 3-kinase, chloroplastic [Brachypodium distachyon] >KQK09210.1 hypothetical protein BRADI_2g46690 [Brachypodium distachyon]	Phosphoribulokinase / Uridine kinase family	D-glycerate 3-kinase, chloroplastic OS=Arabidopsis thaliana GN=GLYK PE=1 SV=2	GO:0004849//uridine kinase activity;GO:0043097//pyrimidine nucleoside salvage;GO:0005829//cytosol;GO:0008887//glycerate kinase activity;GO:0009941//chloroplast envelope;GO:0009853//photorespiration;GO:0006206//pyrimidine nucleobase metabolic process;GO:0009570//chloroplast stroma
CL16931.Contig8_All	1.02	0.73	1.23	1.43333	-0.474662	0.281854	0.49967	0.756516	0.974331	0.217815	K15918//D-glycerate 3-kinase [EC:2.7.1.31]+ko01100//Metabolic pathways+ko01110//Biosynthesis of secondary metabolites+ko00260//Glycine, serine and threonine metabolism+ko01200//Carbon metabolism+ko00630//Glyoxylate and dicarboxylate metabolism+ko00561//Glycerolipid metabolism	AK357229.1 Hordeum vulgare subsp. vulgare mRNA for predicted protein, complete cds, clone: NIASHv1048J18	hypothetical protein BRADI_2g46690 [Brachypodium distachyon]		D-glycerate 3-kinase, chloroplastic OS=Arabidopsis thaliana GN=GLYK PE=1 SV=2	GO:0004849//uridine kinase activity;GO:0043097//pyrimidine nucleoside salvage;GO:0005829//cytosol;GO:0008887//glycerate kinase activity;GO:0009941//chloroplast envelope;GO:0009853//photorespiration;GO:0006206//pyrimidine nucleobase metabolic process;GO:0009570//chloroplast stroma
Unigene28995_All	3.67667	3.68333	4.29	5.00333	0.00484158	0.231252	0.450333	0.226411	0.445491	0.21908	K15918//D-glycerate 3-kinase [EC:2.7.1.31]+ko01100//Metabolic pathways+ko01110//Biosynthesis of secondary metabolites+ko00260//Glycine, serine and threonine metabolism+ko01200//Carbon metabolism+ko00630//Glyoxylate and dicarboxylate metabolism+ko00561//Glycerolipid metabolism	XM_020343564.1 PREDICTED: Aegilops tauschii subsp. tauschii D-glycerate 3-kinase, chloroplastic (LOC109784955), mRNA	PREDICTED: D-glycerate 3-kinase, chloroplastic [Brachypodium distachyon] >KQK09210.1 hypothetical protein BRADI_2g46690 [Brachypodium distachyon]	Phosphoribulokinase / Uridine kinase family	D-glycerate 3-kinase, chloroplastic OS=Arabidopsis thaliana GN=GLYK PE=1 SV=2	GO:0004849//uridine kinase activity;GO:0043097//pyrimidine nucleoside salvage;GO:0005829//cytosol;GO:0008887//glycerate kinase activity;GO:0009941//chloroplast envelope;GO:0009853//photorespiration;GO:0006206//pyrimidine nucleobase metabolic process;GO:0009570//chloroplast stroma
Unigene31726_All	37.0933	29.1333	38.9033	44.9833	-0.345102	0.0817137	0.285387	0.426816	0.630489	0.203673	K15918//D-glycerate 3-kinase [EC:2.7.1.31]+ko01100//Metabolic pathways+ko01110//Biosynthesis of secondary metabolites+ko00260//Glycine, serine and threonine metabolism+ko01200//Carbon metabolism+ko00630//Glyoxylate and dicarboxylate metabolism+ko00561//Glycerolipid metabolism	XM_003569524.3 PREDICTED: Brachypodium distachyon D-glycerate 3-kinase, chloroplastic (LOC100840924), mRNA	PREDICTED: D-glycerate 3-kinase, chloroplastic [Brachypodium distachyon] >KQK09210.1 hypothetical protein BRADI_2g46690 [Brachypodium distachyon]	Phosphoribulokinase / Uridine kinase family	D-glycerate 3-kinase, chloroplastic OS=Arabidopsis thaliana GN=GLYK PE=1 SV=2	GO:0004849//uridine kinase activity;GO:0043097//pyrimidine nucleoside salvage;GO:0005829//cytosol;GO:0008887//glycerate kinase activity;GO:0009941//chloroplast envelope;GO:0009853//photorespiration;GO:0006206//pyrimidine nucleobase metabolic process;GO:0009570//chloroplast stroma
CL16931.Contig14_All	12.1033	9.6	11.4133	12.64	-0.332047	-0.0725142	0.0675313	0.259533	0.399578	0.140045	K15918//D-glycerate 3-kinase [EC:2.7.1.31]+ko01100//Metabolic pathways+ko01110//Biosynthesis of secondary metabolites+ko00260//Glycine, serine and threonine metabolism+ko01200//Carbon metabolism+ko00630//Glyoxylate and dicarboxylate metabolism+ko00561//Glycerolipid metabolism	AK357229.1 Hordeum vulgare subsp. vulgare mRNA for predicted protein, complete cds, clone: NIASHv1048J18	PREDICTED: D-glycerate 3-kinase, chloroplastic [Brachypodium distachyon] >KQK09210.1 hypothetical protein BRADI_2g46690 [Brachypodium distachyon]		D-glycerate 3-kinase, chloroplastic OS=Arabidopsis thaliana GN=GLYK PE=1 SV=2	GO:0004849//uridine kinase activity;GO:0043097//pyrimidine nucleoside salvage;GO:0005829//cytosol;GO:0008887//glycerate kinase activity;GO:0009941//chloroplast envelope;GO:0009853//photorespiration;GO:0006206//pyrimidine nucleobase metabolic process;GO:0009570//chloroplast stroma
The DEGs discussed in the main text are shown in bold
