# Supplementary material for: Transcriptome-Wide Gene Expression Plasticity in Stipa grandis in Response to Grazing Intensity Differences
Source: Int J Mol Sci. 2021 Nov 2;22(21):11882. doi: 10.3390/ijms222111882 (PMC8611654; doi:10.3390/ijms222111882)
Supplement: Supplementary file 1 [file ijms-22-11882-s001.zip › Table S8. Primers used for quantitative real-time PCR.xlsx]

## Sheet: Sheet1
Gene ID	Forward primer（5'→3'）	Reverse primer(5'→3')	Product size (bp)
CL2153.Cotig7_All	GTTCCGTGAGCACAACAGGT	GTCGAAACCGATGATGCGGA	163
Unigene48595_All	ACGTCTCCTTCTCCTACGCC	CTGGTGTACTTGCCGAGCTG	145
CL14956.Contig14_All	TCCTGTTGAGGACTGCGACT	CAGCCCATTGAGCACTTGGT	112
CL5196.Contig6_All	CCTCCGGTGTAACGCAATGT	GGGCAACATTCGACAACCCT	82
Unigene4982_All	GAAATCTGGCTGGATCGCGT	AACAAGAACCGCTGGTCGTC	221
CL95.Cotig34_All	GTATGCGAGGGCGAAACAGG	TGCTCGGCAAGAGAACATGG	173
CL3941.Contig15_All	TTCCCTGCTTAGTGGAGGACC	TCACTGTTCGAGCGATGGTG	215
CL1834.Conig3_All	TGCAGTTCTCCGGCAAGTTC	TAGGGCGTGTACTGCGTGTA	190
CL593.Contig32_All	GTCATCAAGAGGCACACCCG	CTGTCGATATACGGCGGCAC	137
CL16965.Contig10_All	CTCCTTCACAACGACTGCCG	GCAGCTCGTAGCTCTTCTCG	134
